# Supplementary material
Source: publisher site journal article supplement (https://www.dovepress.com/article/353849)
Supplement: Supplementary file 1 [file get_supplementary_file.php]

## Supplementary materials

**Table S1. the 52 pyroptosis-associated genes**

AIM2  
BAK1  
BAX  
CASP1  
CASP3  
CASP4  
CASP5  
CASP6  
CASP8  
CASP9  
CHMP2A  
CHMP2B  
CHMP3  
CHMP4A  
CHMP4B  
CHMP4C  
CHMP6  
CHMP7  
CYCS  
ELANE  
GPX4  
GSDMA  
GSDMB  
GSDMC  
GSDMD  
GSDME  
GZMA  
GZMB  
HMGB1  
IL18  
IL1A  
IL1B  
IL6  
IRF1  
IRF2  
NLRC4  
NLRP1  
NLRP2  
NLRP3  
NLRP6  
NLRP7  
NOD1  
NOD2  
PJVK  
PLCG1  
PRKACA  
PYCARD  
SCAF11  
TIRAP  
TNF

TP53  
TP63

**TABLE S2** The primer sequences information.

| Name           | primer sequences                               |
|----------------|------------------------------------------------|
| CASP4 siRNA 1  | GCUCUCAUCAUCUGCAAUATT<br>UAUUGCAUAUGAUGAGAGCTT |
| CASP4 siRNA 2  | GCGCAAAGAUUCCUCACUTT<br>AGUGAGGAAAUCUUUGCCCTT  |
| CASP4 siRNA 3  | GACACCAUCUCCAGAUAUTT<br>AUAUCUGGAAGAUGGUGUCTT  |
| CHMP4C siRNA 1 | GCAAGUUGGGCAAGUUCUUTT<br>AAGAACUUGCCCAACUUGCTT |
| CHMP4C siRNA 2 | GCUGCAUUACAGGCACUAATT<br>UUAGUGCCUGUAAUGCAGCTT |
| CHMP4C siRNA 3 | CCAAAUGUGCCUCCUCUUTT<br>AAGAGGAAGGCACAUUUGGTT  |
| CASP4 F        | AAGTCCTCTGACAGCACATTCTTGG                      |
| CASP4 R        | GAGGCAGTTGCGGTTGTTGAATATC                      |
| CHMP4C F       | TGCATTACAGGCACTAAAGAGA                         |
| CHMP4C R       | CTTCTCTCTGGA ACTCAATGGT                        |

**TABLE S3. The 9192 DEGs between 168 normal and 151 tumor tissues**

| gene         | logFC    | AveExpr  | t        | P. Value  | adj. P. Val | B        |
|--------------|----------|----------|----------|-----------|-------------|----------|
| RP5-857K21.1 | 2.257353 | 5.465523 | 14.6437  | 1.87E-37  | 1.07E-36    | 72.37571 |
| SAMD11       | 1.643998 | 1.857975 | 18.90763 | 6.23E-54  | 5.05E-53    | 110.2965 |
| NOC2L        | 1.051877 | 4.791405 | 16.16504 | 2.67E-43  | 1.72E-42    | 85.82033 |
| PLEKHN1      | 1.942439 | 1.536973 | 21.18895 | 1.03E-62  | 1.04E-61    | 130.5287 |
| PERM1        | 1.828825 | 1.285498 | 23.8088  | 1.36E-72  | 1.82E-71    | 153.3041 |
| ISG15        | 4.557712 | 4.749479 | 33.87197 | 2.04E-107 | 1.31E-105   | 233.6303 |
| AGRN         | 1.925279 | 5.349104 | 19.77316 | 2.81E-57  | 2.47E-56    | 118.0032 |
| RNF223       | 1.248307 | 0.672549 | 20.90057 | 1.31E-61  | 1.28E-60    | 127.9876 |
| TNFRSF18     | 1.79872  | 1.05299  | 28.37355 | 4.68E-89  | 1.13E-87    | 191.2706 |
| TNFRSF4      | 1.7593   | 1.499702 | 26.37396 | 5.64E-82  | 1.03E-80    | 174.9368 |
| SDF4         | 1.262389 | 6.000318 | 18.40709 | 5.42E-52  | 4.20E-51    | 105.8292 |
| B3GALT6      | 1.16075  | 2.986034 | 21.20117 | 9.25E-63  | 9.37E-62    | 130.6364 |
| FAM132A      | 1.481796 | 1.522723 | 16.96347 | 2.16E-46  | 1.49E-45    | 92.93459 |
| CPTP         | 1.218352 | 3.551898 | 17.96782 | 2.74E-50  | 2.04E-49    | 101.9053 |
| MXRA8        | 3.754103 | 5.336654 | 34.86023 | 1.53E-110 | 1.18E-108   | 240.8454 |
| AURKAIP1     | 1.251716 | 6.08427  | 17.56082 | 1.04E-48  | 7.51E-48    | 98.26892 |
| MRPL20       | 1.307268 | 6.265981 | 18.95164 | 4.21E-54  | 3.42E-53    | 110.6889 |
| P4-758J18.1  | 1.01313  | 1.660595 | 12.0736  | 7.10E-28  | 3.36E-27    | 50.3698  |
| VWA1         | 2.343359 | 5.40788  | 21.94667 | 1.34E-65  | 1.47E-64    | 137.1767 |
| TMEM240      | 1.159077 | 1.161928 | 20.13933 | 1.09E-58  | 9.92E-58    | 121.2538 |
| SSU72        | 1.284628 | 6.028301 | 18.99238 | 2.93E-54  | 2.39E-53    | 111.0523 |
| Clorf233     | 2.240917 | 1.522237 | 36.151   | 1.50E-114 | 1.52E-112   | 250.0901 |
| MMP23B       | 2.359071 | 2.606546 | 25.76767 | 8.71E-80  | 1.48E-78    | 169.8903 |
| MMP23A       | 2.190099 | 1.844035 | 22.47976 | 1.29E-67  | 1.50E-66    | 141.826  |
| GNB1         | 2.309023 | 5.971983 | 31.61415 | 4.47E-100 | 1.88E-98    | 216.6935 |
| TMEM52       | -4.38139 | 4.191071 | -35.9594 | 5.84E-114 | 5.70E-112   | 248.7308 |
| GABRD        | 1.28115  | 0.712583 | 28.5132  | 1.53E-89  | 3.78E-88    | 192.3931 |
| PRKCZ        | 1.184124 | 3.553881 | 18.82688 | 1.28E-53  | 1.03E-52    | 109.5762 |
| FAAP20       | 1.353616 | 4.861045 | 16.03401 | 8.55E-43  | 5.46E-42    | 84.65557 |
| SKI          | 1.723879 | 3.423999 | 24.09024 | 1.23E-73  | 1.70E-72    | 155.7124 |
| RER1         | 1.18024  | 5.965952 | 17.15277 | 3.98E-47  | 2.78E-46    | 94.62439 |
| RP3-395M20.1 | 1.404495 | 2.758727 | 14.50704 | 6.19E-37  | 3.51E-36    | 71.17881 |
| TNFRSF14     | 1.696318 | 5.197197 | 18.87666 | 8.21E-54  | 6.64E-53    | 110.0203 |
| RP3-395M20.2 | 1.761603 | 0.977616 | 23.73202 | 2.62E-72  | 3.48E-71    | 152.6456 |
| FAM213B      | 3.008381 | 3.59743  | 37.51768 | 1.07E-118 | 1.40E-116   | 259.6619 |
| MMEL1        | 2.649827 | 2.322458 | 24.4365  | 6.43E-75  | 9.33E-74    | 158.6641 |
| LINC00982    | -1.45216 | 3.150656 | -14.9704 | 1.05E-38  | 6.20E-38    | 75.24554 |
| ARHGEF16     | 1.839565 | 3.743021 | 21.50845 | 6.23E-64  | 6.50E-63    | 133.3373 |
| MEGF6        | 2.042503 | 3.150046 | 21.84154 | 3.37E-65  | 3.65E-64    | 136.257  |
| TPRG1L       | 1.775357 | 4.654714 | 27.53516 | 4.11E-86  | 8.75E-85    | 184.4811 |
| KCNAB2       | 1.843123 | 2.357308 | 22.29358 | 6.53E-67  | 7.38E-66    | 140.205  |
| RPL22        | 1.06682  | 8.22543  | 12.83824 | 1.14E-30  | 5.68E-30    | 56.78554 |
| ICMT         | 2.008444 | 3.8453   | 32.75718 | 7.94E-104 | 4.15E-102   | 225.3471 |
| GPR153       | 2.528022 | 1.874609 | 34.21078 | 1.71E-108 | 1.17E-106   | 236.1174 |
| ACOT7        | 2.644438 | 3.361333 | 38.69964 | 3.30E-122 | 5.33E-120   | 267.7639 |
| HES2         | 1.058315 | 0.540174 | 15.24923 | 9.00E-40  | 5.40E-39    | 77.70332 |
| ESPN         | 2.67399  | 1.663945 | 24.14128 | 7.93E-74  | 1.11E-72    | 156.1482 |
| TNFRSF25     | 1.356454 | 2.462994 | 15.70827 | 1.54E-41  | 9.59E-41    | 81.7645  |
| PLEKHG5      | 1.274171 | 2.079929 | 19.97631 | 4.63E-58  | 4.14E-57    | 119.8074 |
| PHF13        | 1.518669 | 2.625023 | 27.4631  | 7.38E-86  | 1.56E-84    | 183.8935 |
| CAMTA1       | 1.896232 | 4.831802 | 30.53171 | 1.85E-96  | 6.44E-95    | 208.3478 |

|           |           |           |           |            |            |           |
|-----------|-----------|-----------|-----------|------------|------------|-----------|
| VAMP3     | 2. 317652 | 4. 745577 | 33. 7394  | 5. 41E-107 | 3. 39E-105 | 232. 6533 |
| PARK7     | 1. 34762  | 7. 207541 | 19. 0954  | 1. 17E-54  | 9. 65E-54  | 111. 9707 |
| SLC45A1   | 1. 014412 | 0. 98351  | 19. 70106 | 5. 33E-57  | 4. 66E-56  | 117. 3624 |
| ENO1      | 3. 08665  | 7. 761571 | 31. 40307 | 2. 24E-99  | 9. 04E-98  | 215. 0775 |
| SLC2A5    | 1. 466744 | 1. 016984 | 21. 45233 | 1. 02E-63  | 1. 06E-62  | 132. 8445 |
| GPR157    | 1. 140622 | 1. 859522 | 18. 69956 | 3. 98E-53  | 3. 16E-52  | 108. 4401 |
| H6PD      | 1. 173481 | 3. 484402 | 15. 65304 | 2. 52E-41  | 1. 56E-40  | 81. 27496 |
| SPSB1     | 1. 618882 | 3. 934899 | 16. 26304 | 1. 11E-43  | 7. 24E-43  | 86. 69205 |
| PIK3CD    | 1. 326373 | 1. 815325 | 18. 67548 | 4. 94E-53  | 3. 92E-52  | 108. 2253 |
| CLSTN1    | 1. 792785 | 5. 694122 | 25. 02053 | 4. 59E-77  | 7. 12E-76  | 163. 6135 |
| CTNNBIP1  | 1. 452556 | 3. 937794 | 21. 09907 | 2. 27E-62  | 2. 27E-61  | 129. 7374 |
| LZIC      | 1. 538024 | 3. 274126 | 27. 41721 | 1. 07E-85  | 2. 26E-84  | 183. 519  |
| RN7SL731P | 1. 271413 | 0. 926387 | 19. 59752 | 1. 34E-56  | 1. 16E-55  | 116. 4417 |
| PGD       | 2. 443318 | 4. 883859 | 34. 73521 | 3. 77E-110 | 2. 85E-108 | 239. 9392 |
| APITD1    | 1. 131998 | 3. 274039 | 20. 41833 | 9. 23E-60  | 8. 61E-59  | 123. 7258 |
| DFFA      | 1. 3835   | 3. 060032 | 26. 2707  | 1. 33E-81  | 2. 40E-80  | 174. 0803 |
| PEX14     | 1. 425878 | 3. 048172 | 28. 82631 | 1. 25E-90  | 3. 28E-89  | 194. 9013 |
| TARDBP    | 1. 316257 | 6. 036307 | 20. 06451 | 2. 12E-58  | 1. 91E-57  | 120. 5901 |
| FBXO2     | -1. 22659 | 4. 366525 | -10. 9243 | 8. 53E-24  | 3. 69E-23  | 41. 01644 |
| FBXO6     | 1. 017496 | 3. 061065 | 15. 92227 | 2. 31E-42  | 1. 46E-41  | 83. 66302 |
| AGTRAP    | 1. 346328 | 5. 246329 | 14. 41358 | 1. 40E-36  | 7. 89E-36  | 70. 36162 |
| KIAA2013  | 1. 278799 | 4. 654175 | 21. 31715 | 3. 34E-63  | 3. 42E-62  | 131. 6566 |
| PLOD1     | 2. 235401 | 5. 071382 | 29. 36896 | 1. 68E-92  | 4. 80E-91  | 199. 2193 |
| MFN2      | 1. 452487 | 3. 879051 | 24. 20299 | 4. 69E-74  | 6. 60E-73  | 156. 6749 |
| TNFRSF1B  | 2. 673203 | 3. 021763 | 33. 59938 | 1. 52E-106 | 9. 22E-105 | 231. 6191 |
| DHRS3     | 1. 407143 | 6. 019195 | 15. 80064 | 6. 80E-42  | 4. 26E-41  | 82. 58361 |
| PDPN      | 3. 006972 | 2. 968617 | 28. 25487 | 1. 21E-88  | 2. 88E-87  | 190. 3147 |
| EFHD2     | 1. 842392 | 5. 59471  | 22. 46347 | 1. 49E-67  | 1. 72E-66  | 141. 6842 |
| CTRC      | -7. 41938 | 9. 162793 | -20. 3455 | 1. 76E-59  | 1. 63E-58  | 123. 0807 |
| CELA2A    | -8. 32338 | 8. 803185 | -21. 2658 | 5. 24E-63  | 5. 34E-62  | 131. 2053 |
| CELA2B    | -6. 47668 | 6. 798128 | -19. 8243 | 1. 79E-57  | 1. 58E-56  | 118. 4572 |
| AGMAT     | 1. 169624 | 0. 830206 | 22. 09162 | 3. 79E-66  | 4. 21E-65  | 138. 4432 |
| PLEKHM2   | 1. 122222 | 4. 276361 | 16. 70079 | 2. 25E-45  | 1. 52E-44  | 90. 59143 |
| FBLIM1    | 2. 069146 | 4. 785372 | 28. 30765 | 7. 95E-89  | 1. 90E-87  | 190. 74   |
| CLCNKA    | -1. 14741 | 1. 001832 | -20. 758  | 4. 59E-61  | 4. 44E-60  | 126. 7294 |
| EPHA2     | 3. 322486 | 3. 919941 | 31. 70121 | 2. 30E-100 | 9. 80E-99  | 217. 3583 |
| FBXO42    | 1. 159832 | 2. 954375 | 21. 48151 | 7. 89E-64  | 8. 21E-63  | 133. 1007 |
| SZRD1     | 1. 909742 | 4. 667957 | 29. 38304 | 1. 50E-92  | 4. 31E-91  | 199. 3308 |
| NECAP2    | 2. 285559 | 4. 49423  | 35. 91204 | 8. 17E-114 | 7. 86E-112 | 248. 3938 |
| MST1P2    | -1. 22593 | 2. 287122 | -15. 786  | 7. 74E-42  | 4. 84E-41  | 82. 45413 |
| EIF1AXP1  | 1. 448278 | 2. 097526 | 14. 1594  | 1. 29E-35  | 7. 12E-35  | 68. 14478 |
| MST1L     | -1. 91187 | 3. 853312 | -18. 0124 | 1. 84E-50  | 1. 38E-49  | 102. 3034 |
| MFAP2     | 3. 001231 | 4. 738825 | 26. 93667 | 5. 46E-84  | 1. 08E-82  | 179. 582  |
| SDHB      | 1. 109745 | 5. 466519 | 18. 26559 | 1. 92E-51  | 1. 47E-50  | 104. 5654 |
| PADI2     | 1. 496622 | 1. 290599 | 20. 3566  | 1. 59E-59  | 1. 48E-58  | 123. 1792 |
| PADI1     | 3. 479982 | 1. 722528 | 21. 36422 | 2. 21E-63  | 2. 27E-62  | 132. 0704 |
| RCC2      | 2. 433978 | 4. 279429 | 37. 05652 | 2. 62E-117 | 3. 10E-115 | 256. 4567 |
| ALDH4A1   | 1. 241617 | 2. 002152 | 23. 05857 | 8. 59E-70  | 1. 06E-68  | 146. 8454 |
| UBR4      | 1. 35474  | 5. 773323 | 19. 42743 | 6. 08E-56  | 5. 17E-55  | 114. 9283 |
| EMC1      | 1. 408999 | 3. 404465 | 22. 83192 | 6. 10E-69  | 7. 33E-68  | 144. 8835 |
| AKR7L     | -1. 13154 | 2. 468131 | -11. 2963 | 4. 25E-25  | 1. 89E-24  | 44. 00073 |
| AKR7A3    | -1. 98233 | 5. 361305 | -12. 0404 | 9. 36E-28  | 4. 41E-27  | 50. 09472 |
| AKR7A2    | 1. 186261 | 4. 827405 | 19. 2273  | 3. 61E-55  | 3. 02E-54  | 113. 1461 |
| CAPZB     | 2. 926559 | 6. 590361 | 37. 19867 | 9. 76E-118 | 1. 19E-115 | 257. 4473 |

|              |           |           |           |            |            |           |
|--------------|-----------|-----------|-----------|------------|------------|-----------|
| MINOS1       | 1. 879607 | 6. 048965 | 27. 26378 | 3. 75E-85  | 7. 69E-84  | 182. 2649 |
| MINOS1-NBL1  | 1. 803868 | 1. 345238 | 29. 16372 | 8. 52E-92  | 2. 37E-90  | 197. 5904 |
| NBL1         | 4. 739074 | 5. 538029 | 47. 57427 | 1. 78E-146 | 1. 80E-143 | 323. 776  |
| RNF186       | -2. 26183 | 2. 831155 | -21. 0784 | 2. 72E-62  | 2. 72E-61  | 129. 5555 |
| PLA2G2A      | 1. 269954 | 3. 260985 | 5. 299459 | 2. 18E-07  | 6. 02E-07  | 3. 703135 |
| PLA2G5       | 1. 150866 | 1. 079912 | 15. 78693 | 7. 68E-42  | 4. 80E-41  | 82. 46201 |
| PLA2G2D      | 1. 083953 | 0. 523832 | 13. 12424 | 9. 92E-32  | 5. 08E-31  | 59. 21801 |
| RP3-340N1. 2 | 1. 805281 | 0. 902738 | 16. 62375 | 4. 48E-45  | 3. 00E-44  | 89. 90456 |
| UBXN10-AS1   | 1. 017375 | 0. 610592 | 20. 47276 | 5. 70E-60  | 5. 35E-59  | 124. 2076 |
| UBXN10       | 1. 772713 | 1. 184606 | 27. 10633 | 1. 36E-84  | 2. 73E-83  | 180. 9752 |
| CAMK2N1      | 4. 208563 | 4. 0334   | 46. 7219  | 2. 71E-144 | 2. 41E-141 | 318. 7407 |
| MUL1         | 1. 402334 | 3. 616493 | 24. 23087 | 3. 70E-74  | 5. 23E-73  | 156. 9127 |
| CDA          | 3. 948309 | 2. 418335 | 32. 66587 | 1. 57E-103 | 8. 11E-102 | 224. 6618 |
| PINK1        | 1. 492373 | 4. 806831 | 23. 72052 | 2. 89E-72  | 3. 84E-71  | 152. 547  |
| EIF4G3       | 1. 617282 | 3. 153704 | 25. 38447 | 2. 15E-78  | 3. 51E-77  | 166. 6788 |
| LDLRAD2      | 1. 426201 | 1. 40205  | 21. 14562 | 1. 51E-62  | 1. 52E-61  | 130. 1473 |
| HSPG2        | 2. 733135 | 5. 493439 | 30. 39404 | 5. 40E-96  | 1. 83E-94  | 207. 2758 |
| CELA3B       | -8. 66595 | 9. 208752 | -23. 73   | 2. 67E-72  | 3. 54E-71  | 152. 6283 |
| RN7SL386P    | -5. 48165 | 3. 375075 | -41. 4124 | 5. 25E-130 | 1. 48E-127 | 285. 7629 |
| CELA3A       | -8. 44486 | 10. 67198 | -20. 8544 | 1. 96E-61  | 1. 91E-60  | 127. 58   |
| RN7SL186P    | -6. 25239 | 4. 126062 | -44. 4507 | 2. 47E-138 | 1. 36E-135 | 304. 9828 |
| LINC00339    | -1. 66352 | 4. 713798 | -18. 1744 | 4. 33E-51  | 3. 29E-50  | 103. 7505 |
| CDC42        | 2. 39412  | 5. 942189 | 32. 44536 | 8. 24E-103 | 4. 03E-101 | 223. 0025 |
| WNT4         | 1. 276796 | 1. 551124 | 13. 6911  | 7. 55E-34  | 4. 03E-33  | 64. 0846  |
| C1QA         | 3. 872293 | 5. 347224 | 31. 98341 | 2. 70E-101 | 1. 20E-99  | 219. 507  |
| C1QC         | 3. 468697 | 5. 11969  | 26. 88163 | 8. 59E-84  | 1. 68E-82  | 179. 1293 |
| C1QB         | 3. 479008 | 5. 581799 | 25. 90112 | 2. 86E-80  | 4. 93E-79  | 171. 0047 |
| EPHB2        | 2. 055635 | 2. 033061 | 25. 28665 | 4. 89E-78  | 7. 87E-77  | 165. 8564 |
| KDM1A        | 1. 242155 | 4. 639646 | 19. 59193 | 1. 41E-56  | 1. 22E-55  | 116. 392  |
| LUZP1        | 1. 647921 | 2. 050497 | 29. 47258 | 7. 39E-93  | 2. 15E-91  | 200. 0397 |
| HTR1D        | 1. 600259 | 0. 798178 | 22. 87405 | 4. 23E-69  | 5. 12E-68  | 145. 2486 |
| HNRNPR       | 1. 788823 | 4. 961287 | 28. 36375 | 5. 06E-89  | 1. 22E-87  | 191. 1917 |
| ZNF436       | 1. 018878 | 2. 218796 | 13. 55884 | 2. 37E-33  | 1. 25E-32  | 62. 94413 |
| TCEA3        | -1. 11344 | 5. 730507 | -11. 5639 | 4. 79E-26  | 2. 18E-25  | 46. 17429 |
| ID3          | 1. 567306 | 5. 281135 | 14. 85514 | 2. 91E-38  | 1. 70E-37  | 74. 23172 |
| PITHD1       | 1. 053609 | 4. 549496 | 18. 79301 | 1. 73E-53  | 1. 39E-52  | 109. 274  |
| LYPLA2       | 1. 90443  | 5. 096068 | 27. 55919 | 3. 38E-86  | 7. 22E-85  | 184. 6768 |
| GALE         | 2. 99485  | 4. 507895 | 31. 84581 | 7. 66E-101 | 3. 35E-99  | 218. 4606 |
| HMGCL        | 1. 434752 | 4. 394752 | 24. 58188 | 1. 87E-75  | 2. 76E-74  | 159. 8995 |
| FUCA1        | 2. 562777 | 4. 198483 | 38. 67124 | 4. 01E-122 | 6. 43E-120 | 267. 5711 |
| PNRC2        | 1. 526964 | 4. 672196 | 21. 63851 | 1. 99E-64  | 2. 11E-63  | 134. 4784 |
| MYOM3        | 1. 127146 | 1. 059077 | 16. 69284 | 2. 42E-45  | 1. 63E-44  | 90. 52054 |
| IL22RA1      | -2. 37696 | 4. 874491 | -19. 0304 | 2. 08E-54  | 1. 71E-53  | 111. 3913 |
| STPG1        | 1. 250285 | 2. 047958 | 24. 70516 | 6. 59E-76  | 9. 86E-75  | 160. 9454 |
| RCAN3        | 1. 170789 | 2. 482882 | 21. 67543 | 1. 44E-64  | 1. 53E-63  | 134. 802  |
| CLIC4        | 2. 217819 | 4. 414212 | 23. 57248 | 1. 03E-71  | 1. 34E-70  | 151. 2756 |
| RUNX3        | 2. 03285  | 1. 371108 | 25. 06087 | 3. 27E-77  | 5. 10E-76  | 163. 954  |
| SYF2         | 1. 287748 | 5. 130514 | 19. 38931 | 8. 53E-56  | 7. 23E-55  | 114. 5889 |
| TMEM50A      | 2. 463146 | 5. 379089 | 35. 4896  | 1. 66E-112 | 1. 44E-110 | 245. 3781 |
| MAN1C1       | 1. 612608 | 2. 42403  | 19. 40226 | 7. 60E-56  | 6. 45E-55  | 114. 7042 |
| SEPN1        | 1. 04707  | 4. 880992 | 15. 59791 | 4. 11E-41  | 2. 53E-40  | 80. 78659 |
| PAQR7        | 1. 570466 | 2. 435873 | 27. 51653 | 4. 78E-86  | 1. 02E-84  | 184. 3292 |
| STMN1        | 3. 482397 | 4. 900806 | 41. 48981 | 3. 19E-130 | 9. 14E-128 | 286. 2646 |
| SLC30A2      | -3. 07139 | 3. 464496 | -20. 6438 | 1. 26E-60  | 1. 20E-59  | 125. 7199 |

|              |          |          |          |           |           |          |
|--------------|----------|----------|----------|-----------|-----------|----------|
| RP11-96L14.7 | 1.345159 | 1.270621 | 12.74278 | 2.56E-30  | 1.27E-29  | 55.97738 |
| SH3BGR13     | 2.934615 | 6.835833 | 34.65352 | 6.81E-110 | 5.11E-108 | 239.3461 |
| CD52         | 4.577154 | 3.922332 | 34.78899 | 2.55E-110 | 1.94E-108 | 240.3292 |
| AIM1L        | 3.1573   | 1.762091 | 33.57568 | 1.81E-106 | 1.09E-104 | 231.4438 |
| DHDDS        | 1.104568 | 3.660282 | 18.65897 | 5.72E-53  | 4.53E-52  | 108.0778 |
| HMG2         | 1.451331 | 7.490377 | 17.68591 | 3.40E-49  | 2.48E-48  | 99.38654 |
| RPS6KA1      | 1.905812 | 4.002455 | 28.87937 | 8.18E-91  | 2.17E-89  | 195.3251 |
| ZDHHC18      | 1.028105 | 2.905827 | 17.25602 | 1.58E-47  | 1.12E-46  | 95.54637 |
| SFN          | 6.35482  | 3.753813 | 64.56827 | 1.35E-184 | 2.04E-180 | 411.7745 |
| GPN2         | 1.422483 | 3.366432 | 26.35796 | 6.44E-82  | 1.18E-80  | 174.8041 |
| GPATCH3      | 1.245108 | 2.535428 | 28.50654 | 1.61E-89  | 3.99E-88  | 192.3397 |
| NUDC         | 1.356004 | 5.595431 | 21.33508 | 2.85E-63  | 2.93E-62  | 131.8143 |
| TRNP1        | 2.370889 | 4.209295 | 21.30159 | 3.83E-63  | 3.91E-62  | 131.5198 |
| SLC9A1       | 2.640412 | 3.782893 | 33.97762 | 9.40E-108 | 6.14E-106 | 234.4074 |
| TMEM222      | 1.34989  | 4.444131 | 21.98952 | 9.25E-66  | 1.01E-64  | 137.5513 |
| SYTL1        | -1.0404  | 5.507597 | -10.7726 | 2.86E-23  | 1.22E-22  | 39.81182 |
| MAP3K6       | 1.515926 | 4.1104   | 17.98679 | 2.31E-50  | 1.73E-49  | 102.0748 |
| WASF2        | 1.15465  | 4.321493 | 15.60383 | 3.90E-41  | 2.40E-40  | 80.83905 |
| AHDC1        | 1.021527 | 2.625819 | 12.24576 | 1.69E-28  | 8.07E-28  | 51.80234 |
| FGR          | 1.560779 | 2.31604  | 16.05004 | 7.41E-43  | 4.74E-42  | 84.79803 |
| IFI6         | 4.695602 | 5.950118 | 31.5745  | 6.05E-100 | 2.52E-98  | 216.3904 |
| STX12        | 1.372893 | 3.882623 | 21.17336 | 1.18E-62  | 1.19E-61  | 130.3915 |
| PPP1R8       | 1.605259 | 3.534211 | 28.48525 | 1.91E-89  | 4.72E-88  | 192.1687 |
| THEMIS2      | 2.825364 | 2.994338 | 30.01938 | 1.00E-94  | 3.22E-93  | 204.3465 |
| RPA2         | 1.74122  | 3.93605  | 27.58552 | 2.73E-86  | 5.85E-85  | 184.8913 |
| SPCS2P4      | 1.559161 | 4.162394 | 23.20337 | 2.46E-70  | 3.09E-69  | 148.0962 |
| PTAFR        | 2.751137 | 1.963948 | 39.19701 | 1.16E-123 | 2.01E-121 | 271.1254 |
| DNAJC8       | 1.884703 | 4.812917 | 31.16766 | 1.36E-98  | 5.28E-97  | 213.2688 |
| ATPIF1       | 1.914858 | 6.744965 | 24.75908 | 4.17E-76  | 6.30E-75  | 161.4024 |
| MED18        | 1.496785 | 2.595016 | 28.31519 | 7.48E-89  | 1.79E-87  | 190.8008 |
| PHACTR4      | 1.081763 | 3.141054 | 21.27962 | 4.64E-63  | 4.74E-62  | 131.3266 |
| RCC1         | 1.539852 | 3.515247 | 19.05071 | 1.74E-54  | 1.43E-53  | 111.5723 |
| TRNAU1AP     | 1.154344 | 3.494613 | 19.12721 | 8.80E-55  | 7.29E-54  | 112.2542 |
| TAF12        | 1.265841 | 3.611454 | 22.29439 | 6.48E-67  | 7.33E-66  | 140.212  |
| RAB42        | 1.699647 | 1.069313 | 32.18885 | 5.70E-102 | 2.66E-100 | 221.0648 |
| GMEB1        | 1.271529 | 1.809475 | 29.1586  | 8.87E-92  | 2.47E-90  | 197.5498 |
| YTHDF2       | 1.370128 | 4.224096 | 24.09377 | 1.19E-73  | 1.65E-72  | 155.7425 |
| TMEM200B     | 1.629841 | 1.447099 | 24.99193 | 5.84E-77  | 9.04E-76  | 163.372  |
| MECR         | 1.09818  | 3.74257  | 19.08646 | 1.27E-54  | 1.04E-53  | 111.891  |
| PTPRU        | 1.508676 | 3.679    | 16.94323 | 2.59E-46  | 1.78E-45  | 92.75401 |
| LAPTM5       | 3.999048 | 4.85623  | 34.96101 | 7.37E-111 | 5.88E-109 | 241.5744 |
| SDC3         | 2.433269 | 2.988014 | 32.66372 | 1.60E-103 | 8.22E-102 | 224.6457 |
| PUM1         | 1.446117 | 3.828718 | 23.48854 | 2.12E-71  | 2.73E-70  | 150.5537 |
| SNRNP40      | 1.614819 | 3.764527 | 31.04332 | 3.55E-98  | 1.35E-96  | 212.3106 |
| ZCCHC17      | 1.547789 | 3.615501 | 29.984   | 1.33E-94  | 4.22E-93  | 204.0689 |
| FABP3        | 2.866475 | 2.289858 | 33.23243 | 2.30E-105 | 1.31E-103 | 228.8972 |
| SERINC2      | 3.378104 | 5.365876 | 32.20212 | 5.16E-102 | 2.41E-100 | 221.1652 |
| TINAGL1      | 2.762806 | 5.347579 | 28.06113 | 5.79E-88  | 1.33E-86  | 188.7506 |
| PEF1         | 1.816385 | 4.892933 | 29.75581 | 7.94E-94  | 2.43E-92  | 202.2751 |
| COL16A1      | 3.36461  | 4.248064 | 34.1418  | 2.83E-108 | 1.91E-106 | 235.6122 |
| ADGRB2       | 1.65264  | 1.067989 | 31.36647 | 2.97E-99  | 1.18E-97  | 214.7968 |
| SPOCD1       | 2.105585 | 1.136304 | 27.96303 | 1.28E-87  | 2.89E-86  | 187.9569 |
| PTP4A2       | 2.13662  | 6.09289  | 29.31147 | 2.64E-92  | 7.49E-91  | 198.7635 |
| KHDRBS1      | 1.946152 | 5.036487 | 31.43053 | 1.82E-99  | 7.35E-98  | 215.2881 |

|              |           |           |           |            |            |           |
|--------------|-----------|-----------|-----------|------------|------------|-----------|
| TMEM39B      | 1. 441847 | 2. 790843 | 27. 79112 | 5. 14E-87  | 1. 13E-85  | 186. 563  |
| KPNA6        | 1. 130043 | 3. 062227 | 20. 40229 | 1. 06E-59  | 9. 91E-59  | 123. 5839 |
| CCDC28B      | 1. 608899 | 2. 525651 | 29. 31981 | 2. 47E-92  | 7. 03E-91  | 198. 8297 |
| EIF3I        | 1. 483336 | 6. 360483 | 21. 39497 | 1. 69E-63  | 1. 74E-62  | 132. 3406 |
| FAM167B      | 1. 305144 | 2. 567736 | 17. 47402 | 2. 26E-48  | 1. 62E-47  | 97. 49345 |
| LCK          | 2. 872796 | 1. 889575 | 32. 23274 | 4. 09E-102 | 1. 92E-100 | 221. 397  |
| HDAC1        | 1. 979009 | 5. 52462  | 27. 7766  | 5. 78E-87  | 1. 27E-85  | 186. 4451 |
| MARCKSL1     | 4. 160502 | 5. 198322 | 44. 88104 | 1. 77E-139 | 1. 08E-136 | 307. 6285 |
| ZBTB80S      | 1. 203164 | 4. 436491 | 21. 57671 | 3. 42E-64  | 3. 60E-63  | 133. 9364 |
| RBBP4        | 1. 166172 | 5. 212105 | 15. 3961  | 2. 45E-40  | 1. 49E-39  | 79. 00084 |
| SYNC         | 1. 348062 | 0. 923085 | 19. 64126 | 9. 07E-57  | 7. 88E-56  | 116. 8307 |
| TMEM54       | 3. 013704 | 5. 163387 | 33. 99339 | 8. 38E-108 | 5. 50E-106 | 234. 5232 |
| RNF19B       | 2. 588224 | 3. 277058 | 37. 47864 | 1. 40E-118 | 1. 82E-116 | 259. 3915 |
| AK2          | 1. 476025 | 5. 793832 | 22. 8586  | 4. 84E-69  | 5. 83E-68  | 145. 1147 |
| AZIN2        | 1. 694044 | 1. 903935 | 27. 95157 | 1. 40E-87  | 3. 17E-86  | 187. 864  |
| ZNF362       | 1. 267929 | 3. 168757 | 21. 22182 | 7. 72E-63  | 7. 83E-62  | 130. 8181 |
| PHC2         | 2. 112249 | 5. 499405 | 27. 06883 | 1. 85E-84  | 3. 70E-83  | 180. 6675 |
| SMIM12       | 1. 584151 | 4. 085989 | 26. 7674  | 2. 20E-83  | 4. 23E-82  | 178. 1886 |
| GJB5         | 2. 541255 | 1. 352746 | 21. 86216 | 2. 81E-65  | 3. 05E-64  | 136. 4375 |
| GJB4         | 2. 440988 | 1. 196087 | 28. 0008  | 9. 42E-88  | 2. 14E-86  | 188. 2625 |
| RP1-34M23. 5 | 1. 606934 | 0. 793048 | 21. 7457  | 7. 79E-65  | 8. 34E-64  | 135. 4178 |
| GJB3         | 4. 626369 | 2. 3766   | 54. 57355 | 2. 47E-163 | 1. 15E-159 | 362. 6923 |
| GJA4         | 1. 543719 | 2. 544996 | 19. 00129 | 2. 70E-54  | 2. 21E-53  | 111. 1317 |
| ZMYM6NB      | 1. 835351 | 4. 419626 | 28. 07593 | 5. 14E-88  | 1. 18E-86  | 188. 8702 |
| ZMYM4        | 1. 144782 | 2. 86838  | 20. 7281  | 5. 98E-61  | 5. 77E-60  | 126. 465  |
| NCDN         | 1. 286722 | 2. 883619 | 21. 55733 | 4. 06E-64  | 4. 26E-63  | 133. 7663 |
| PSMB2        | 2. 097147 | 4. 736945 | 35. 32159 | 5. 51E-112 | 4. 69E-110 | 244. 1728 |
| Clorf216     | 1. 561933 | 2. 160054 | 28. 74452 | 2. 40E-90  | 6. 21E-89  | 194. 2473 |
| CLSPN        | 1. 0016   | 0. 573485 | 26. 96407 | 4. 36E-84  | 8. 63E-83  | 179. 8072 |
| ADPRHL2      | 1. 899123 | 3. 774034 | 33. 25458 | 1. 95E-105 | 1. 11E-103 | 229. 062  |
| COL8A2       | 3. 176182 | 1. 921128 | 35. 06856 | 3. 40E-111 | 2. 77E-109 | 242. 3511 |
| TRAPPC3      | 1. 518756 | 4. 948256 | 26. 71344 | 3. 42E-83  | 6. 56E-82  | 177. 7437 |
| MAP7D1       | 2. 745115 | 4. 648668 | 37. 03991 | 2. 94E-117 | 3. 46E-115 | 256. 3407 |
| THRAP3       | 1. 207569 | 4. 50501  | 18. 79444 | 1. 71E-53  | 1. 37E-52  | 109. 2868 |
| SH3D21       | 2. 196539 | 1. 647225 | 25. 92178 | 2. 41E-80  | 4. 17E-79  | 171. 177  |
| EVA1B        | 2. 055685 | 3. 462901 | 21. 61006 | 2. 56E-64  | 2. 70E-63  | 134. 2289 |
| P11-268J15.  | 1. 515603 | 1. 266086 | 20. 12645 | 1. 22E-58  | 1. 11E-57  | 121. 1396 |
| LSM10        | 1. 63879  | 4. 31237  | 28. 80418 | 1. 49E-90  | 3. 90E-89  | 194. 7245 |
| OSCP1        | 1. 054586 | 2. 424674 | 19. 75795 | 3. 22E-57  | 2. 82E-56  | 117. 868  |
| MRPS15       | 1. 264885 | 5. 230741 | 21. 26483 | 5. 29E-63  | 5. 39E-62  | 131. 1965 |
| CSF3R        | 1. 552964 | 2. 364017 | 13. 63131 | 1. 27E-33  | 6. 72E-33  | 63. 56869 |
| LINC01137    | 1. 769305 | 2. 203784 | 31. 59705 | 5. 09E-100 | 2. 13E-98  | 216. 5628 |
| ZC3H12A      | 1. 71157  | 3. 36004  | 17. 31399 | 9. 44E-48  | 6. 67E-47  | 96. 06404 |
| MEAF6        | 1. 458841 | 4. 774734 | 22. 20951 | 1. 36E-66  | 1. 52E-65  | 139. 472  |
| GNL2         | 1. 651443 | 4. 406258 | 27. 09634 | 1. 48E-84  | 2. 96E-83  | 180. 8932 |
| CDCA8        | 2. 310731 | 1. 486812 | 39. 82219 | 1. 77E-125 | 3. 51E-123 | 275. 3112 |
| MANEAL       | 1. 020351 | 2. 552535 | 16. 72066 | 1. 89E-45  | 1. 27E-44  | 90. 76855 |
| SF3A3        | 1. 29454  | 4. 021867 | 21. 7665  | 6. 50E-65  | 6. 97E-64  | 135. 6    |
| FHL3         | 2. 028764 | 3. 746284 | 28. 04353 | 6. 67E-88  | 1. 53E-86  | 188. 6083 |
| UTP11L       | 1. 082979 | 3. 735779 | 19. 33928 | 1. 33E-55  | 1. 12E-54  | 114. 1434 |
| RRAGC        | 1. 767163 | 3. 216572 | 30. 39976 | 5. 16E-96  | 1. 76E-94  | 207. 3204 |
| MYCBP        | 1. 250662 | 3. 454877 | 22. 60964 | 4. 19E-68  | 4. 91E-67  | 142. 9549 |
| RHBDL2       | 3. 083019 | 1. 777465 | 44. 25906 | 8. 06E-138 | 4. 24E-135 | 303. 7985 |
| AKIRIN1      | 1. 464532 | 3. 680092 | 23. 38924 | 4. 97E-71  | 6. 35E-70  | 149. 6989 |



|          |           |           |           |            |            |           |
|----------|-----------|-----------|-----------|------------|------------|-----------|
| NDUFS5   | 1. 927501 | 7. 309477 | 24. 6313  | 1. 23E-75  | 1. 83E-74  | 160. 319  |
| MACF1    | 1. 57209  | 5. 391367 | 21. 25915 | 5. 56E-63  | 5. 66E-62  | 131. 1465 |
| HPCAL4   | -1. 19724 | 0. 806844 | -12. 8746 | 8. 35E-31  | 4. 18E-30  | 57. 09385 |
| MYCL     | -1. 24135 | 2. 558002 | -12. 4991 | 2. 01E-29  | 9. 77E-29  | 53. 9232  |
| MFS2A    | 2. 890859 | 1. 672843 | 35. 5482  | 1. 09E-112 | 9. 61E-111 | 245. 7978 |
| CAP1     | 3. 075705 | 6. 13118  | 38. 08488 | 2. 17E-120 | 3. 10E-118 | 263. 57   |
| PPT1     | 2. 141133 | 4. 706786 | 29. 36796 | 1. 69E-92  | 4. 83E-91  | 199. 2114 |
| RLF      | 1. 021814 | 1. 871664 | 20. 34092 | 1. 83E-59  | 1. 69E-58  | 123. 0404 |
| ZMPSTE24 | 1. 946384 | 3. 660747 | 33. 34586 | 9. 91E-106 | 5. 78E-104 | 229. 7403 |
| COL9A2   | 2. 080444 | 2. 032138 | 22. 64856 | 2. 99E-68  | 3. 52E-67  | 143. 293  |
| SMAP2    | 1. 600161 | 4. 049337 | 18. 79222 | 1. 74E-53  | 1. 40E-52  | 109. 267  |
| EXO5     | 1. 036027 | 1. 835013 | 22. 13535 | 2. 59E-66  | 2. 89E-65  | 138. 8249 |
| CTPS1    | 1. 336468 | 3. 106602 | 19. 62151 | 1. 08E-56  | 9. 38E-56  | 116. 6551 |
| HIVEP3   | 1. 146302 | 1. 69526  | 15. 34428 | 3. 88E-40  | 2. 35E-39  | 78. 54284 |
| PPCS     | 1. 185554 | 5. 226271 | 18. 92908 | 5. 14E-54  | 4. 18E-53  | 110. 4878 |
| PPIH     | 2. 055265 | 3. 991762 | 35. 58157 | 8. 59E-113 | 7. 64E-111 | 246. 0365 |
| YBX1     | 1. 87873  | 7. 446385 | 23. 73171 | 2. 63E-72  | 3. 49E-71  | 152. 643  |
| P3H1     | 2. 137703 | 4. 056239 | 29. 07719 | 1. 69E-91  | 4. 65E-90  | 196. 9022 |
| Clorf50  | 1. 07844  | 2. 828592 | 22. 38527 | 2. 94E-67  | 3. 36E-66  | 141. 0036 |
| CCDC23   | 2. 053039 | 3. 45456  | 35. 72771 | 3. 03E-113 | 2. 79E-111 | 247. 0805 |
| SLC2A1   | 5. 31184  | 4. 47792  | 43. 45117 | 1. 22E-135 | 5. 60E-133 | 298. 7655 |
| EBNA1BP2 | 1. 420948 | 4. 8216   | 24. 36041 | 1. 23E-74  | 1. 76E-73  | 158. 0165 |
| TIE1     | 1. 902345 | 2. 517665 | 23. 54676 | 1. 28E-71  | 1. 66E-70  | 151. 0545 |
| CDC20    | 3. 639547 | 2. 139601 | 45. 4623  | 5. 15E-141 | 3. 62E-138 | 311. 1729 |
| ELOVL1   | 2. 019312 | 5. 580195 | 28. 25496 | 1. 21E-88  | 2. 88E-87  | 190. 3154 |
| MED8     | 1. 125016 | 4. 22667  | 20. 24148 | 4. 42E-59  | 4. 05E-58  | 122. 1594 |
| PTPRF    | 1. 645388 | 5. 330813 | 20. 08391 | 1. 78E-58  | 1. 61E-57  | 120. 7623 |
| KDM4A    | 1. 324894 | 2. 906054 | 24. 61732 | 1. 39E-75  | 2. 06E-74  | 160. 2004 |
| IPO13    | 1. 087849 | 3. 19331  | 20. 2146  | 5. 60E-59  | 5. 12E-58  | 121. 9212 |
| ATP6VOB  | 1. 251972 | 6. 65714  | 17. 129   | 4. 93E-47  | 3. 44E-46  | 94. 41214 |
| CCDC24   | 1. 067991 | 3. 303506 | 14. 73774 | 8. 17E-38  | 4. 72E-37  | 73. 20058 |
| ERI3     | 1. 345887 | 4. 442621 | 24. 46579 | 5. 01E-75  | 7. 30E-74  | 158. 9132 |
| RNF220   | 1. 203509 | 5. 030664 | 19. 91779 | 7. 78E-58  | 6. 93E-57  | 119. 288  |
| TMEM53   | 1. 852613 | 2. 95101  | 31. 46566 | 1. 39E-99  | 5. 67E-98  | 215. 5573 |
| KIF2C    | 2. 33885  | 1. 379365 | 39. 12528 | 1. 87E-123 | 3. 21E-121 | 270. 6424 |
| PLK3     | 1. 960235 | 3. 789317 | 22. 64442 | 3. 10E-68  | 3. 65E-67  | 143. 257  |
| BTBD19   | 1. 174061 | 1. 939136 | 16. 27925 | 9. 64E-44  | 6. 28E-43  | 86. 83629 |
| UROD     | 1. 379898 | 5. 047029 | 23. 45029 | 2. 94E-71  | 3. 78E-70  | 150. 2246 |
| HPDL     | 1. 297    | 0. 777815 | 20. 20966 | 5. 85E-59  | 5. 35E-58  | 121. 8774 |
| TOE1     | 1. 151478 | 2. 167814 | 23. 63507 | 6. 02E-72  | 7. 86E-71  | 151. 8134 |
| PRDX1    | 3. 003333 | 6. 910275 | 37. 42581 | 2. 02E-118 | 2. 57E-116 | 259. 0253 |
| NASP     | 1. 468396 | 5. 058058 | 22. 32083 | 5. 15E-67  | 5. 85E-66  | 140. 4424 |
| GPBP1L1  | 1. 098151 | 5. 104952 | 16. 11987 | 3. 98E-43  | 2. 56E-42  | 85. 41873 |
| MAST2    | 1. 917466 | 3. 204814 | 27. 60363 | 2. 35E-86  | 5. 06E-85  | 185. 0387 |
| PIK3R3   | 1. 162211 | 1. 969429 | 17. 39556 | 4. 56E-48  | 3. 24E-47  | 96. 79263 |
| TSPAN1   | 6. 111687 | 4. 685978 | 52. 30884 | 4. 48E-158 | 1. 13E-154 | 350. 553  |
| POMGNT1  | 1. 068648 | 4. 543719 | 16. 40218 | 3. 23E-44  | 2. 12E-43  | 87. 93059 |
| RAD54L   | 1. 566644 | 1. 011061 | 29. 58027 | 3. 16E-93  | 9. 38E-92  | 200. 8908 |
| LRRC41   | 1. 005178 | 4. 59895  | 16. 54734 | 8. 85E-45  | 5. 88E-44  | 89. 22365 |
| UQCRH    | 1. 977023 | 6. 96036  | 28. 37446 | 4. 64E-89  | 1. 13E-87  | 191. 2779 |
| NSUN4    | 1. 013493 | 2. 873771 | 18. 96631 | 3. 69E-54  | 3. 01E-53  | 110. 8198 |
| MKNK1    | -2. 16356 | 5. 415563 | -26. 983  | 3. 74E-84  | 7. 41E-83  | 179. 9623 |
| EFCAB14  | 1. 759309 | 4. 177754 | 25. 18688 | 1. 13E-77  | 1. 80E-76  | 165. 0164 |
| PDZK1IP1 | 2. 6877   | 6. 345348 | 25. 06608 | 3. 13E-77  | 4. 88E-76  | 163. 9979 |

|              |          |          |          |           |           |          |
|--------------|----------|----------|----------|-----------|-----------|----------|
| STIL         | 1.238206 | 0.9413   | 28.63437 | 5.78E-90  | 1.47E-88  | 193.3652 |
| CMPK1        | 1.840819 | 5.55636  | 25.57037 | 4.53E-79  | 7.53E-78  | 168.2388 |
| FOXD2-AS1    | 1.24834  | 0.921405 | 26.05145 | 8.19E-81  | 1.44E-79  | 172.2576 |
| RNF11        | 1.726952 | 4.324894 | 22.6691  | 2.50E-68  | 2.95E-67  | 143.4713 |
| TTC39A       | 1.635558 | 3.266119 | 19.3678  | 1.03E-55  | 8.73E-55  | 114.3974 |
| EPS15        | 1.520315 | 3.266006 | 25.27361 | 5.45E-78  | 8.77E-77  | 165.7467 |
| RAB3B        | 1.066661 | 0.886464 | 17.28772 | 1.19E-47  | 8.43E-47  | 95.82941 |
| TXNDC12      | 1.500813 | 4.554035 | 27.20651 | 5.99E-85  | 1.22E-83  | 181.7962 |
| KTI12        | 1.106134 | 2.342594 | 24.94118 | 8.96E-77  | 1.38E-75  | 162.9432 |
| BTF3L4       | 1.171193 | 4.336057 | 19.08277 | 1.31E-54  | 1.08E-53  | 111.8581 |
| PRPF38A      | 1.307571 | 3.572983 | 23.98945 | 2.90E-73  | 3.97E-72  | 154.8508 |
| GPX7         | 1.444543 | 3.05251  | 18.76807 | 2.16E-53  | 1.73E-52  | 109.0515 |
| FAM159A      | 1.099747 | 0.66698  | 19.65652 | 7.92E-57  | 6.89E-56  | 116.9664 |
| COA7         | 1.199738 | 2.181007 | 24.50197 | 3.69E-75  | 5.40E-74  | 159.2207 |
| ZYG11B       | 1.11903  | 1.802554 | 24.17898 | 5.75E-74  | 8.09E-73  | 156.47   |
| RP4-631H13.6 | -1.29995 | 1.465095 | -10.9694 | 5.94E-24  | 2.58E-23  | 41.37587 |
| SCP2         | 2.148982 | 5.919677 | 28.50615 | 1.61E-89  | 4.00E-88  | 192.3365 |
| PODN         | 1.906129 | 3.886744 | 17.61848 | 6.22E-49  | 4.51E-48  | 98.78404 |
| P11-334A14.  | 1.096367 | 0.578102 | 8.801533 | 8.86E-17  | 3.27E-16  | 24.97143 |
| Clorf123     | 1.259176 | 4.751098 | 19.55968 | 1.87E-56  | 1.61E-55  | 116.105  |
| MAGOH        | 1.842384 | 4.740042 | 30.42541 | 4.23E-96  | 1.45E-94  | 207.5203 |
| LRP8         | 1.662953 | 1.240057 | 24.76582 | 3.94E-76  | 5.95E-75  | 161.4595 |
| NDC1         | 1.424723 | 2.021438 | 29.70888 | 1.15E-93  | 3.48E-92  | 201.9054 |
| YIPF1        | 1.56041  | 3.926324 | 26.82238 | 1.40E-83  | 2.71E-82  | 178.6415 |
| HSPB11       | 1.549403 | 3.723449 | 27.47967 | 6.45E-86  | 1.36E-84  | 184.0287 |
| LRRC42       | 2.153766 | 3.523064 | 33.92503 | 1.38E-107 | 8.95E-106 | 234.0208 |
| TMEM59       | 1.743096 | 7.615935 | 22.83089 | 6.15E-69  | 7.39E-68  | 144.8747 |
| SSBP3        | 1.68235  | 4.364664 | 25.30211 | 4.29E-78  | 6.92E-77  | 165.9864 |
| ACOT11       | 1.650843 | 1.92649  | 26.49497 | 2.08E-82  | 3.86E-81  | 175.9388 |
| TTC4         | 1.137643 | 3.109169 | 23.65466 | 5.09E-72  | 6.67E-71  | 151.9816 |
| TTC22        | 1.153146 | 2.855445 | 17.02455 | 1.25E-46  | 8.67E-46  | 93.47978 |
| DHCR24       | 2.379354 | 4.484149 | 24.97217 | 6.90E-77  | 1.07E-75  | 163.2051 |
| TACSTD2      | 2.752277 | 5.960938 | 22.076   | 4.35E-66  | 4.81E-65  | 138.3068 |
| RP4-592A1.2  | 1.034459 | 0.834509 | 31.01748 | 4.33E-98  | 1.64E-96  | 212.1113 |
| CYP2J2       | 1.850639 | 1.655708 | 25.62428 | 2.88E-79  | 4.83E-78  | 168.6905 |
| TM2D1        | 1.438205 | 4.228965 | 23.14195 | 4.18E-70  | 5.21E-69  | 147.5659 |
| USP1         | 1.153595 | 2.984415 | 20.37593 | 1.34E-59  | 1.25E-58  | 123.3504 |
| DOCK7        | 1.418353 | 2.390179 | 27.02771 | 2.59E-84  | 5.17E-83  | 180.33   |
| ITGB3BP      | 1.044957 | 3.199249 | 15.83226 | 5.14E-42  | 3.22E-41  | 82.86414 |
| JAK1         | 1.520893 | 4.81481  | 20.90423 | 1.26E-61  | 1.24E-60  | 128.0199 |
| AK4          | 2.807981 | 1.817065 | 32.29285 | 2.60E-102 | 1.24E-100 | 221.8515 |
| LEPROT       | 1.440311 | 4.418165 | 20.71534 | 6.69E-61  | 6.45E-60  | 126.3524 |
| LEPR         | 1.206478 | 1.510354 | 14.98153 | 9.55E-39  | 5.62E-38  | 75.34347 |
| PDE4B        | 1.715967 | 1.420276 | 22.66118 | 2.68E-68  | 3.16E-67  | 143.4025 |
| SGIP1        | 1.736988 | 1.382097 | 23.38968 | 4.95E-71  | 6.33E-70  | 149.7027 |
| MIER1        | 1.628056 | 2.745067 | 28.59077 | 8.20E-90  | 2.06E-88  | 193.0157 |
| SERBP1       | 1.255616 | 6.098478 | 17.56392 | 1.01E-48  | 7.30E-48  | 98.29663 |
| GADD45A      | 2.314962 | 3.931458 | 28.60808 | 7.14E-90  | 1.80E-88  | 193.1544 |
| GNG12        | 2.225617 | 4.014397 | 29.75374 | 8.07E-94  | 2.47E-92  | 202.2589 |
| DEPDC1       | 1.025806 | 0.542642 | 24.35968 | 1.23E-74  | 1.77E-73  | 158.0103 |
| LRRC40       | 1.001622 | 1.896396 | 19.51196 | 2.86E-56  | 2.46E-55  | 115.6805 |
| ANKRD13C     | 1.023828 | 2.29661  | 20.7937  | 3.35E-61  | 3.25E-60  | 127.0444 |
| ST6GALNAC5   | 1.517714 | 0.982112 | 22.16544 | 1.99E-66  | 2.23E-65  | 139.0876 |
| PIGK         | 1.512656 | 2.97757  | 24.39661 | 9.02E-75  | 1.30E-73  | 158.3246 |

|           |          |          |          |           |           |          |
|-----------|----------|----------|----------|-----------|-----------|----------|
| AK5       | 1.063698 | 0.731401 | 17.03502 | 1.14E-46  | 7.90E-46  | 93.5732  |
| FAM73A    | 1.042124 | 1.919844 | 20.19589 | 6.61E-59  | 6.03E-58  | 121.7553 |
| IFI44L    | 2.778727 | 2.085504 | 22.78025 | 9.54E-69  | 1.14E-67  | 144.4356 |
| IFI44     | 2.711661 | 3.756852 | 18.93318 | 4.96E-54  | 4.03E-53  | 110.5243 |
| ADGRL4    | 1.780469 | 2.376575 | 23.19175 | 2.72E-70  | 3.41E-69  | 147.996  |
| ADGRL2    | 1.225447 | 2.919471 | 15.77504 | 8.54E-42  | 5.33E-41  | 82.35649 |
| TTLL7     | -1.29977 | 2.139165 | -17.9081 | 4.67E-50  | 3.47E-49  | 101.3717 |
| PRKACB    | 2.255174 | 3.056277 | 28.7659  | 2.02E-90  | 5.25E-89  | 194.4183 |
| SAMD13    | 1.298987 | 1.275454 | 20.27626 | 3.24E-59  | 2.98E-58  | 122.4676 |
| RPF1      | 1.516761 | 3.947345 | 27.05829 | 2.02E-84  | 4.03E-83  | 180.581  |
| GNG5      | 1.875386 | 6.359461 | 24.86668 | 1.68E-76  | 2.57E-75  | 162.3133 |
| CTBS      | 1.070919 | 3.10221  | 18.56877 | 1.28E-52  | 1.01E-51  | 107.2728 |
| SSX2IP    | 1.33672  | 1.725382 | 22.54526 | 7.32E-68  | 8.52E-67  | 142.3955 |
| LPAR3     | -1.48231 | 1.206851 | -29.4662 | 7.78E-93  | 2.26E-91  | 199.9892 |
| MCOLN3    | -1.87825 | 2.11994  | -27.2892 | 3.05E-85  | 6.28E-84  | 182.4728 |
| BCL10     | 2.46561  | 2.676098 | 37.93961 | 5.87E-120 | 8.12E-118 | 262.5726 |
| DDAH1     | 1.688675 | 3.825595 | 25.54703 | 5.51E-79  | 9.13E-78  | 168.0432 |
| CYR61     | 2.071669 | 5.533645 | 14.03028 | 3.98E-35  | 2.17E-34  | 67.0221  |
| ZNHIT6    | 1.211423 | 2.465402 | 22.66748 | 2.53E-68  | 2.99E-67  | 143.4572 |
| ODF2L     | 1.120988 | 3.364133 | 15.24655 | 9.21E-40  | 5.53E-39  | 77.6797  |
| SH3GLB1   | 1.468708 | 4.979867 | 20.25633 | 3.87E-59  | 3.55E-58  | 122.291  |
| 15-Sep    | 2.165154 | 6.402651 | 29.56419 | 3.59E-93  | 1.06E-91  | 200.7638 |
| HS2ST1    | 1.652174 | 2.555956 | 28.95937 | 4.32E-91  | 1.16E-89  | 195.9635 |
| LINC01140 | 1.106511 | 1.697117 | 14.48522 | 7.49E-37  | 4.24E-36  | 70.98793 |
| LMO4      | 2.550079 | 4.802741 | 29.12469 | 1.16E-91  | 3.21E-90  | 197.2801 |
| GTF2B     | 1.489418 | 3.985153 | 25.97242 | 1.58E-80  | 2.75E-79  | 171.5993 |
| RBMXL1    | 1.001553 | 1.93343  | 21.5136  | 5.95E-64  | 6.21E-63  | 133.3825 |
| GBP3      | 3.008653 | 3.037081 | 28.03017 | 7.43E-88  | 1.70E-86  | 188.5002 |
| GBP1      | 2.570424 | 2.776012 | 27.99646 | 9.76E-88  | 2.22E-86  | 188.2274 |
| PTGES3P1  | 1.255427 | 2.378914 | 19.95572 | 5.56E-58  | 4.96E-57  | 119.6247 |
| GBP2      | 3.935738 | 4.182805 | 44.72767 | 4.52E-139 | 2.68E-136 | 306.6877 |
| GBP4      | 2.817532 | 2.221632 | 36.36659 | 3.29E-115 | 3.45E-113 | 251.6148 |
| GBP5      | 2.041405 | 1.337705 | 22.57536 | 5.64E-68  | 6.58E-67  | 142.6571 |
| LRRC8C    | 1.496206 | 1.246333 | 26.90371 | 7.16E-84  | 1.40E-82  | 179.3109 |
| LRRC8D    | 1.218535 | 2.782798 | 22.62534 | 3.65E-68  | 4.29E-67  | 143.0913 |
| ZNF644    | 1.382677 | 2.964311 | 25.65945 | 2.15E-79  | 3.61E-78  | 168.9849 |
| EPHX4     | 1.884804 | 0.942501 | 30.00995 | 1.08E-94  | 3.46E-93  | 204.2724 |
| GLMN      | 1.005584 | 2.069024 | 19.40859 | 7.19E-56  | 6.10E-55  | 114.7605 |
| GFI1      | -1.02267 | 1.711946 | -16.5097 | 1.24E-44  | 8.20E-44  | 88.88784 |
| EVI5      | 1.117497 | 1.909286 | 21.45241 | 1.02E-63  | 1.06E-62  | 132.8452 |
| FAM69A    | 1.710588 | 1.828154 | 30.56065 | 1.48E-96  | 5.16E-95  | 208.5728 |
| TMED5     | 1.065862 | 3.585056 | 15.54785 | 6.40E-41  | 3.92E-40  | 80.34338 |
| DR1       | 1.815541 | 3.409445 | 28.33789 | 6.23E-89  | 1.50E-87  | 190.9836 |
| FNBP1L    | 1.267264 | 3.454985 | 18.5053  | 2.26E-52  | 1.76E-51  | 106.7061 |
| BCAR3     | 2.764368 | 2.694299 | 36.97097 | 4.76E-117 | 5.52E-115 | 255.8593 |
| DNTTIP2   | 1.847232 | 4.217203 | 31.44574 | 1.62E-99  | 6.57E-98  | 215.4046 |
| GCLM      | 1.47738  | 2.199191 | 21.20502 | 8.95E-63  | 9.06E-62  | 130.6702 |
| F3        | 1.500157 | 5.585424 | 8.83303  | 7.07E-17  | 2.62E-16  | 25.1952  |
| SLC44A3   | 1.077668 | 3.908311 | 14.24711 | 6.01E-36  | 3.33E-35  | 68.9088  |
| CNN3      | 1.699315 | 5.589189 | 17.23992 | 1.83E-47  | 1.29E-46  | 95.40257 |
| RPL7P9    | 1.005372 | 4.71433  | 13.8449  | 1.99E-34  | 1.07E-33  | 65.41436 |
| DPYD      | 1.701249 | 2.556618 | 22.17663 | 1.81E-66  | 2.02E-65  | 139.1852 |
| SNX7      | 1.755674 | 3.4358   | 27.49101 | 5.88E-86  | 1.25E-84  | 184.1211 |
| PALMD     | 1.235419 | 2.207118 | 15.61216 | 3.62E-41  | 2.23E-40  | 80.91282 |

|               |           |           |           |            |            |           |
|---------------|-----------|-----------|-----------|------------|------------|-----------|
| FRRS1         | 1. 445508 | 1. 253726 | 22. 06471 | 4. 80E-66  | 5. 30E-65  | 138. 2082 |
| SLC35A3       | 1. 467925 | 2. 677208 | 22. 98392 | 1. 64E-69  | 2. 00E-68  | 146. 1998 |
| HIAT1         | 1. 037225 | 3. 767331 | 16. 12687 | 3. 74E-43  | 2. 41E-42  | 85. 48093 |
| VCAM1         | 2. 382365 | 3. 257026 | 19. 69739 | 5. 51E-57  | 4. 81E-56  | 117. 3298 |
| SLC30A7       | 1. 008388 | 2. 402355 | 19. 22795 | 3. 59E-55  | 3. 00E-54  | 113. 1518 |
| S1PR1         | 1. 336328 | 2. 858086 | 14. 06433 | 2. 96E-35  | 1. 62E-34  | 67. 31792 |
| COL11A1       | 4. 814179 | 2. 551432 | 32. 54394 | 3. 93E-103 | 1. 96E-101 | 223. 7451 |
| RNPC3         | -1. 34965 | 3. 525803 | -18. 3058 | 1. 34E-51  | 1. 03E-50  | 104. 925  |
| AMY2B         | -5. 63101 | 7. 478045 | -23. 1024 | 5. 89E-70  | 7. 29E-69  | 147. 224  |
| AMY2A         | -8. 04646 | 8. 590877 | -20. 2295 | 4. 91E-59  | 4. 49E-58  | 122. 0532 |
| P5-1108M17.   | -2. 686   | 2. 835445 | -6. 88057 | 3. 19E-11  | 1. 01E-10  | 12. 33836 |
| AMYP1         | -2. 22938 | 2. 797111 | -8. 10162 | 1. 18E-14  | 4. 15E-14  | 20. 12899 |
| SLC25A24      | 2. 323039 | 2. 983751 | 31. 57184 | 6. 17E-100 | 2. 57E-98  | 216. 37   |
| FAM102B       | 1. 848425 | 1. 987471 | 30. 02261 | 9. 79E-95  | 3. 14E-93  | 204. 3718 |
| HENMT1        | 2. 492693 | 1. 826035 | 40. 09262 | 2. 95E-126 | 6. 14E-124 | 277. 1082 |
| GPSM2         | 1. 56194  | 1. 853199 | 25. 95676 | 1. 80E-80  | 3. 13E-79  | 171. 4687 |
| WDR47         | 1. 022828 | 1. 786179 | 20. 06969 | 2. 02E-58  | 1. 83E-57  | 120. 6361 |
| RP11-20024. 4 | -1. 09246 | 2. 300612 | -15. 9293 | 2. 17E-42  | 1. 37E-41  | 83. 72505 |
| TAF13         | 1. 914306 | 3. 840073 | 31. 01616 | 4. 37E-98  | 1. 66E-96  | 212. 1011 |
| TMEM167B      | 1. 336317 | 3. 581234 | 22. 07837 | 4. 26E-66  | 4. 71E-65  | 138. 3275 |
| KIAA1324      | -1. 63383 | 4. 714284 | -12. 2493 | 1. 64E-28  | 7. 84E-28  | 51. 83163 |
| PSRC1         | 1. 429823 | 1. 465413 | 27. 67038 | 1. 37E-86  | 2. 98E-85  | 185. 5819 |
| SORT1         | 1. 794402 | 3. 361784 | 28. 46565 | 2. 23E-89  | 5. 50E-88  | 192. 0113 |
| PSMA5         | 2. 068385 | 4. 898982 | 32. 04993 | 1. 63E-101 | 7. 38E-100 | 220. 0119 |
| GNAI3         | 1. 261435 | 1. 62158  | 32. 77133 | 7. 14E-104 | 3. 74E-102 | 225. 4532 |
| GSTM4         | 1. 111364 | 4. 155677 | 13. 59971 | 1. 66E-33  | 8. 82E-33  | 63. 29617 |
| GSTM2         | -1. 30502 | 5. 066777 | -14. 2678 | 5. 02E-36  | 2. 79E-35  | 69. 08887 |
| GSTM5         | 1. 41323  | 1. 941386 | 16. 58946 | 6. 08E-45  | 4. 06E-44  | 89. 59898 |
| EPS8L3        | 5. 040656 | 3. 086322 | 38. 21117 | 9. 15E-121 | 1. 35E-118 | 264. 4351 |
| CSF1          | 1. 489525 | 3. 437286 | 15. 95566 | 1. 72E-42  | 1. 09E-41  | 83. 95953 |
| AHCYL1        | 1. 085994 | 4. 775245 | 16. 09228 | 5. 09E-43  | 3. 26E-42  | 85. 1734  |
| RBM15         | 1. 011365 | 1. 437942 | 26. 90638 | 7. 01E-84  | 1. 37E-82  | 179. 3329 |
| SLC16A4       | 2. 833102 | 1. 878999 | 32. 19088 | 5. 61E-102 | 2. 62E-100 | 221. 0802 |
| LAMTOR5       | 2. 017205 | 6. 131241 | 28. 96272 | 4. 21E-91  | 1. 13E-89  | 195. 9902 |
| CYMP          | 1. 106982 | 0. 542912 | 9. 556859 | 3. 48E-19  | 1. 36E-18  | 30. 46579 |
| CD53          | 3. 083445 | 3. 639201 | 26. 87842 | 8. 82E-84  | 1. 72E-82  | 179. 1029 |
| LRIF1         | 1. 626198 | 2. 145127 | 27. 43461 | 9. 31E-86  | 1. 96E-84  | 183. 6609 |
| DRAM2         | 1. 671763 | 4. 767133 | 25. 2555  | 6. 35E-78  | 1. 02E-76  | 165. 5943 |
| CEPT1         | 1. 029115 | 3. 44321  | 15. 69632 | 1. 72E-41  | 1. 07E-40  | 81. 65857 |
| P5-1180E21.   | 1. 633265 | 2. 734961 | 20. 25667 | 3. 86E-59  | 3. 54E-58  | 122. 294  |
| DENND2D       | 1. 970401 | 3. 931435 | 26. 78207 | 1. 95E-83  | 3. 76E-82  | 178. 3095 |
| CHI3L2        | 1. 520757 | 1. 076999 | 18. 84512 | 1. 09E-53  | 8. 77E-53  | 109. 7389 |
| ATP5F1        | 1. 38054  | 6. 5961   | 19. 61325 | 1. 16E-56  | 1. 01E-55  | 116. 5816 |
| Clorf162      | 2. 159274 | 3. 260798 | 21. 68741 | 1. 30E-64  | 1. 38E-63  | 134. 9071 |
| ADORA3        | 1. 362819 | 1. 494862 | 16. 25566 | 1. 19E-43  | 7. 73E-43  | 86. 62641 |
| RAP1A         | 2. 019668 | 4. 534653 | 28. 01538 | 8. 38E-88  | 1. 91E-86  | 188. 3805 |
| CTTNBP2NL     | 2. 268386 | 2. 281161 | 35. 80631 | 1. 73E-113 | 1. 62E-111 | 247. 641  |
| CAPZA1        | 1. 89972  | 4. 882744 | 27. 84739 | 3. 26E-87  | 7. 25E-86  | 187. 0196 |
| MOV10         | 1. 312674 | 4. 719451 | 17. 24932 | 1. 68E-47  | 1. 18E-46  | 95. 48653 |
| RHOC          | 3. 154133 | 7. 089426 | 36. 29099 | 5. 60E-115 | 5. 80E-113 | 251. 0807 |
| RP3-522D1. 1  | 1. 001154 | 0. 510585 | 19. 83051 | 1. 69E-57  | 1. 49E-56  | 118. 5127 |
| SLC16A1       | 2. 969113 | 2. 239996 | 41. 18678 | 2. 27E-129 | 6. 15E-127 | 284. 2968 |
| PHTF1         | 1. 154893 | 2. 804365 | 21. 54971 | 4. 34E-64  | 4. 55E-63  | 133. 6994 |
| PTPN22        | 1. 133485 | 1. 252276 | 20. 25726 | 3. 84E-59  | 3. 52E-58  | 122. 2992 |

|               |           |           |           |            |            |           |
|---------------|-----------|-----------|-----------|------------|------------|-----------|
| BCL2L15       | 1. 97383  | 3. 921962 | 20. 00374 | 3. 63E-58  | 3. 26E-57  | 120. 0509 |
| DCLRE1B       | 1. 354401 | 1. 166557 | 35. 30675 | 6. 13E-112 | 5. 20E-110 | 244. 0662 |
| HIPK1         | 1. 024164 | 3. 302854 | 16. 62106 | 4. 59E-45  | 3. 07E-44  | 89. 88065 |
| OLFML3        | 1. 994126 | 4. 087923 | 19. 59191 | 1. 41E-56  | 1. 22E-55  | 116. 3918 |
| BCAS2         | 1. 527433 | 3. 966634 | 25. 21211 | 9. 14E-78  | 1. 46E-76  | 165. 2289 |
| NRAS          | 1. 833551 | 2. 964401 | 30. 49217 | 2. 52E-96  | 8. 69E-95  | 208. 0401 |
| CSDE1         | 1. 190403 | 6. 607924 | 15. 12575 | 2. 68E-39  | 1. 59E-38  | 76. 61394 |
| SIKE1         | 1. 290479 | 3. 259136 | 23. 87586 | 7. 65E-73  | 1. 03E-71  | 153. 8786 |
| TSPAN2        | 2. 333189 | 1. 858637 | 24. 73897 | 4. 95E-76  | 7. 44E-75  | 161. 232  |
| VANGL1        | 1. 412003 | 1. 727739 | 23. 17356 | 3. 19E-70  | 3. 99E-69  | 147. 8389 |
| ATP1A1        | 1. 424609 | 8. 077277 | 15. 62326 | 3. 28E-41  | 2. 02E-40  | 81. 01112 |
| CD58          | 2. 885805 | 3. 199339 | 38. 17782 | 1. 15E-120 | 1. 68E-118 | 264. 2068 |
| IGSF3         | 1. 759745 | 1. 748078 | 25. 98067 | 1. 48E-80  | 2. 57E-79  | 171. 668  |
| CD2           | 2. 540681 | 1. 79427  | 26. 90243 | 7. 24E-84  | 1. 42E-82  | 179. 3004 |
| PTGFRN        | 2. 567254 | 4. 477044 | 33. 77172 | 4. 27E-107 | 2. 70E-105 | 232. 8917 |
| CD101         | 1. 006895 | 1. 297315 | 16. 82792 | 7. 24E-46  | 4. 93E-45  | 91. 72519 |
| FAM46C        | -1. 05251 | 3. 142365 | -11. 8323 | 5. 26E-27  | 2. 44E-26  | 48. 37487 |
| GDAP2         | 1. 018955 | 2. 141277 | 19. 36417 | 1. 07E-55  | 9. 01E-55  | 114. 365  |
| WDR3          | 1. 098522 | 2. 20694  | 15. 51944 | 8. 23E-41  | 5. 04E-40  | 80. 09186 |
| TBX15         | 1. 34684  | 0. 703272 | 18. 28748 | 1. 58E-51  | 1. 21E-50  | 104. 7609 |
| HMGCS2        | 1. 546674 | 1. 899082 | 8. 398946 | 1. 52E-15  | 5. 46E-15  | 22. 15498 |
| REG4          | 1. 217783 | 5. 356827 | 4. 521945 | 8. 67E-06  | 2. 22E-05  | 0. 144995 |
| NOTCH2        | 1. 337178 | 3. 232754 | 17. 35881 | 6. 33E-48  | 4. 49E-47  | 96. 46436 |
| AC241377. 2   | 1. 058713 | 1. 16176  | 18. 81572 | 1. 41E-53  | 1. 14E-52  | 109. 4766 |
| LINC00623     | 1. 332303 | 3. 196986 | 20. 73337 | 5. 70E-61  | 5. 51E-60  | 126. 5116 |
| FCGR1B        | 1. 131838 | 1. 134188 | 17. 96071 | 2. 92E-50  | 2. 18E-49  | 101. 8418 |
| FAM72B        | 1. 005927 | 0. 690179 | 29. 16347 | 8. 54E-92  | 2. 38E-90  | 197. 5884 |
| SRGAP2C       | 1. 487988 | 1. 608792 | 25. 20493 | 9. 71E-78  | 1. 55E-76  | 165. 1685 |
| JH17-13I23. 5 | 1. 396409 | 1. 501356 | 14. 49477 | 6. 89E-37  | 3. 90E-36  | 71. 07146 |
| SRGAP2D       | 1. 076264 | 0. 742451 | 14. 21359 | 8. 05E-36  | 4. 45E-35  | 68. 61666 |
| RP11-14N7. 2  | 2. 311379 | 2. 318767 | 24. 74683 | 4. 63E-76  | 6. 97E-75  | 161. 2986 |
| SRGAP2B       | 1. 878255 | 1. 876863 | 25. 65562 | 2. 22E-79  | 3. 73E-78  | 168. 9529 |
| P11-403I13.   | 1. 009998 | 2. 947011 | 15. 24429 | 9. 40E-40  | 5. 64E-39  | 77. 6597  |
| AC241585. 2   | 1. 260915 | 2. 338057 | 18. 12842 | 6. 53E-51  | 4. 93E-50  | 103. 3401 |
| P11-289I10.   | 2. 141871 | 1. 737823 | 33. 39076 | 7. 10E-106 | 4. 19E-104 | 230. 0736 |
| POLR3C        | 1. 172898 | 3. 449059 | 21. 65814 | 1. 68E-64  | 1. 78E-63  | 134. 6504 |
| PIAS3         | 1. 153719 | 4. 148642 | 15. 46882 | 1. 29E-40  | 7. 87E-40  | 79. 64398 |
| ANKRD35       | 1. 135242 | 0. 894496 | 24. 17359 | 6. 02E-74  | 8. 47E-73  | 156. 424  |
| PEX11B        | 1. 778169 | 4. 120303 | 30. 68305 | 5. 73E-97  | 2. 04E-95  | 209. 5234 |
| RBM8A         | 2. 390911 | 5. 697712 | 34. 73306 | 3. 83E-110 | 2. 89E-108 | 239. 9236 |
| LIX1L         | 2. 120114 | 2. 640556 | 35. 1311  | 2. 17E-111 | 1. 77E-109 | 242. 8021 |
| POLR3GL       | 1. 93815  | 4. 149062 | 33. 21214 | 2. 67E-105 | 1. 52E-103 | 228. 7462 |
| TXNIP         | 1. 284135 | 7. 944156 | 11. 07335 | 2. 58E-24  | 1. 13E-23  | 42. 20672 |
| NUDT4P2       | 1. 818499 | 2. 255884 | 20. 68498 | 8. 74E-61  | 8. 40E-60  | 126. 0841 |
| CHD1L         | 1. 399824 | 3. 447398 | 23. 56907 | 1. 06E-71  | 1. 38E-70  | 151. 2463 |
| BCL9          | 1. 291536 | 2. 336309 | 22. 16299 | 2. 04E-66  | 2. 28E-65  | 139. 0662 |
| ACP6          | 1. 530535 | 3. 729991 | 20. 46552 | 6. 08E-60  | 5. 70E-59  | 124. 1435 |
| GJA5          | 1. 81285  | 1. 580329 | 26. 03683 | 9. 25E-81  | 1. 62E-79  | 172. 1359 |
| AC245100. 1   | 1. 444548 | 2. 221183 | 24. 02468 | 2. 14E-73  | 2. 95E-72  | 155. 1521 |
| NBPF14        | 1. 264195 | 3. 388486 | 17. 01657 | 1. 34E-46  | 9. 31E-46  | 93. 40853 |
| NUDT4P1       | 1. 818499 | 2. 255884 | 20. 68498 | 8. 74E-61  | 8. 40E-60  | 126. 0841 |
| PDE4DIP       | 1. 268337 | 4. 282109 | 13. 53528 | 2. 90E-33  | 1. 53E-32  | 62. 7412  |
| I2-1896014.   | 1. 281584 | 1. 560479 | 16. 63815 | 3. 94E-45  | 2. 64E-44  | 90. 03296 |
| LINC00869     | 1. 049429 | 3. 898453 | 16. 98402 | 1. 80E-46  | 1. 24E-45  | 93. 11798 |

|              |           |           |           |            |            |           |
|--------------|-----------|-----------|-----------|------------|------------|-----------|
| FCGR1A       | 2. 905042 | 2. 538817 | 31. 19543 | 1. 10E-98  | 4. 28E-97  | 213. 4825 |
| HIST2H4A     | 1. 73158  | 2. 596237 | 15. 8907  | 3. 06E-42  | 1. 93E-41  | 83. 38278 |
| HIST2H2AA3   | 2. 531125 | 4. 007348 | 15. 31004 | 5. 26E-40  | 3. 17E-39  | 78. 24033 |
| HIST2H2BE    | 1. 813754 | 2. 952284 | 15. 92187 | 2. 32E-42  | 1. 47E-41  | 83. 65952 |
| AC239868. 3  | 3. 54709  | 2. 802807 | 20. 71331 | 6. 81E-61  | 6. 56E-60  | 126. 3344 |
| HIST2H2AA4   | 2. 461123 | 3. 124544 | 12. 38683 | 5. 17E-29  | 2. 49E-28  | 52. 98147 |
| AC239868. 2  | 3. 54709  | 2. 802807 | 20. 71331 | 6. 81E-61  | 6. 56E-60  | 126. 3344 |
| HIST2H4B     | 1. 525904 | 1. 873261 | 17. 23447 | 1. 92E-47  | 1. 35E-46  | 95. 35392 |
| SV2A         | 1. 290087 | 1. 150598 | 20. 71092 | 6. 95E-61  | 6. 70E-60  | 126. 3133 |
| SF3B4        | 2. 079289 | 4. 534598 | 33. 63064 | 1. 21E-106 | 7. 37E-105 | 231. 8502 |
| MTMR11       | 3. 321695 | 3. 611491 | 28. 3277  | 6. 76E-89  | 1. 63E-87  | 190. 9015 |
| OTUD7B       | 1. 348448 | 1. 861086 | 30. 09337 | 5. 63E-95  | 1. 82E-93  | 204. 9264 |
| VPS45        | 1. 363906 | 3. 904225 | 26. 57621 | 1. 06E-82  | 2. 00E-81  | 176. 6106 |
| PLEKH01      | 3. 229111 | 3. 541272 | 37. 76183 | 1. 99E-119 | 2. 69E-117 | 261. 3487 |
| ANP32E       | 2. 351853 | 3. 173226 | 39. 27631 | 6. 78E-124 | 1. 19E-121 | 271. 6588 |
| CA14         | 1. 134184 | 0. 663455 | 16. 40521 | 3. 14E-44  | 2. 06E-43  | 87. 95759 |
| APH1A        | 2. 024094 | 6. 158391 | 29. 14244 | 1. 01E-91  | 2. 80E-90  | 197. 4213 |
| Clorf54      | 3. 125229 | 2. 914276 | 41. 48968 | 3. 19E-130 | 9. 14E-128 | 286. 2638 |
| CIART        | 1. 590331 | 2. 044774 | 19. 00991 | 2. 50E-54  | 2. 05E-53  | 111. 2086 |
| MRPS21       | 1. 699079 | 5. 075975 | 26. 96558 | 4. 31E-84  | 8. 52E-83  | 179. 8196 |
| RPRD2        | 1. 160351 | 2. 862022 | 19. 10578 | 1. 07E-54  | 8. 81E-54  | 112. 0632 |
| TARS2        | 1. 332774 | 3. 391989 | 25. 09107 | 2. 53E-77  | 3. 97E-76  | 164. 2088 |
| ECM1         | 4. 349799 | 3. 491588 | 39. 31429 | 5. 26E-124 | 9. 30E-122 | 271. 914  |
| ADAMTSL4     | 1. 771631 | 2. 86893  | 18. 86756 | 8. 90E-54  | 7. 19E-53  | 109. 9391 |
| MCL1         | 1. 496943 | 6. 566355 | 16. 28397 | 9. 25E-44  | 6. 02E-43  | 86. 87836 |
| ENSA         | 1. 850032 | 5. 915592 | 28. 1258  | 3. 44E-88  | 7. 97E-87  | 189. 2732 |
| GOLPH3L      | 1. 287752 | 3. 953223 | 19. 16918 | 6. 05E-55  | 5. 04E-54  | 112. 6282 |
| CTSS         | 4. 527898 | 4. 667557 | 41. 22205 | 1. 80E-129 | 4. 94E-127 | 284. 5263 |
| CTSK         | 4. 485747 | 4. 412001 | 38. 54641 | 9. 34E-122 | 1. 48E-119 | 266. 7226 |
| CERS2        | 1. 389249 | 6. 315251 | 17. 56941 | 9. 64E-49  | 6. 96E-48  | 98. 34567 |
| P11-316M1. 1 | 3. 180697 | 1. 881216 | 22. 32941 | 4. 78E-67  | 5. 43E-66  | 140. 5171 |
| PRUNE        | 1. 455321 | 3. 073918 | 28. 40474 | 3. 64E-89  | 8. 87E-88  | 191. 5216 |
| CDC42SE1     | 1. 355886 | 5. 121198 | 17. 94329 | 3. 41E-50  | 2. 54E-49  | 101. 6861 |
| GABPB2       | 1. 016149 | 1. 938839 | 19. 19855 | 4. 66E-55  | 3. 89E-54  | 112. 8899 |
| TNFAIP8L2    | 1. 870069 | 1. 516108 | 25. 77708 | 8. 05E-80  | 1. 37E-78  | 169. 9689 |
| SCNM1        | 2. 042764 | 4. 40006  | 33. 37587 | 7. 93E-106 | 4. 65E-104 | 229. 9632 |
| LYSMD1       | 1. 000133 | 1. 98988  | 22. 75697 | 1. 17E-68  | 1. 39E-67  | 144. 2337 |
| VPS72        | 1. 942459 | 4. 285411 | 34. 51458 | 1. 87E-109 | 1. 37E-107 | 238. 3355 |
| PIP5K1A      | 1. 317985 | 3. 667971 | 20. 22708 | 5. 02E-59  | 4. 59E-58  | 122. 0318 |
| PSMD4        | 1. 795557 | 6. 314067 | 25. 37684 | 2. 29E-78  | 3. 73E-77  | 166. 6147 |
| PI4KB        | 1. 144201 | 4. 738114 | 19. 08621 | 1. 27E-54  | 1. 05E-53  | 111. 8888 |
| RFX5         | 1. 862886 | 3. 240696 | 28. 11573 | 3. 73E-88  | 8. 63E-87  | 189. 1919 |
| SELENBP1     | 1. 251975 | 4. 874444 | 13. 40003 | 9. 31E-33  | 4. 87E-32  | 61. 57862 |
| PSMB4        | 1. 847467 | 7. 077542 | 25. 46053 | 1. 14E-78  | 1. 86E-77  | 167. 3176 |
| CGN          | 1. 045079 | 4. 753735 | 12. 10668 | 5. 39E-28  | 2. 55E-27  | 50. 64448 |
| TUFT1        | 1. 443436 | 3. 538369 | 18. 35629 | 8. 53E-52  | 6. 59E-51  | 105. 3755 |
| SNX27        | 1. 359806 | 2. 672381 | 25. 58986 | 3. 85E-79  | 6. 42E-78  | 168. 4021 |
| MRPL9        | 1. 569741 | 4. 933582 | 25. 82107 | 5. 58E-80  | 9. 55E-79  | 170. 3364 |
| TDRKH        | 1. 016929 | 1. 829245 | 20. 33554 | 1. 92E-59  | 1. 77E-58  | 122. 9928 |
| S100A10      | 4. 643238 | 7. 849624 | 45. 15052 | 3. 42E-140 | 2. 20E-137 | 309. 2758 |
| S100A11      | 4. 565054 | 8. 547176 | 40. 61047 | 9. 75E-128 | 2. 26E-125 | 280. 5269 |
| SPRR1A       | 1. 837237 | 1. 5349   | 10. 6698  | 6. 47E-23  | 2. 75E-22  | 39. 0002  |
| SPRR3        | 1. 469722 | 2. 194177 | 7. 741293 | 1. 33E-13  | 4. 54E-13  | 17. 73859 |
| SPRR1B       | 2. 712548 | 1. 776791 | 14. 86706 | 2. 62E-38  | 1. 53E-37  | 74. 33647 |

|              |          |          |          |           |           |          |
|--------------|----------|----------|----------|-----------|-----------|----------|
| S100A9       | 2.060336 | 5.081522 | 13.62712 | 1.31E-33  | 6.97E-33  | 63.53248 |
| S100A8       | 1.37784  | 3.838389 | 9.220476 | 4.23E-18  | 1.61E-17  | 27.98654 |
| BX470102.3   | 2.712389 | 1.45256  | 26.93711 | 5.45E-84  | 1.07E-82  | 179.5856 |
| S100A6       | 6.522998 | 8.932507 | 55.42572 | 2.88E-165 | 1.45E-161 | 367.1553 |
| S100A5       | 1.030173 | 0.514074 | 21.6867  | 1.31E-64  | 1.39E-63  | 134.9008 |
| S100A4       | 4.508913 | 6.357338 | 31.37054 | 2.88E-99  | 1.15E-97  | 214.8281 |
| S100A3       | 1.958493 | 1.339948 | 29.49435 | 6.23E-93  | 1.82E-91  | 200.2118 |
| S100A2       | 4.976766 | 3.084828 | 25.30391 | 4.23E-78  | 6.82E-77  | 166.0016 |
| S100A16      | 4.677405 | 6.147682 | 51.29675 | 1.15E-155 | 2.17E-152 | 344.9923 |
| S100A14      | 4.875224 | 5.080241 | 41.21285 | 1.92E-129 | 5.22E-127 | 284.4665 |
| S100A13      | 2.797927 | 6.285144 | 34.80228 | 2.32E-110 | 1.78E-108 | 240.4256 |
| RP1-178F15.5 | 1.402009 | 1.260938 | 28.32051 | 7.17E-89  | 1.72E-87  | 190.8436 |
| SNAPIN       | 1.816584 | 4.163779 | 31.25149 | 7.16E-99  | 2.81E-97  | 213.9137 |
| ILF2         | 1.677923 | 5.923918 | 25.55355 | 5.21E-79  | 8.65E-78  | 168.0979 |
| AL513523.2   | 2.107745 | 3.009945 | 21.13152 | 1.71E-62  | 1.71E-61  | 130.0231 |
| SLC27A3      | 1.725721 | 4.147152 | 22.6099  | 4.18E-68  | 4.90E-67  | 142.9571 |
| CRTC2        | 1.224409 | 4.505452 | 18.87811 | 8.10E-54  | 6.55E-53  | 110.0332 |
| SLC39A1      | 2.504624 | 5.387298 | 33.55778 | 2.07E-106 | 1.24E-104 | 231.3114 |
| CREB3L4      | 1.000639 | 3.631257 | 15.78887 | 7.55E-42  | 4.72E-41  | 82.47921 |
| RAB13        | 1.712694 | 6.223863 | 25.84271 | 4.66E-80  | 7.99E-79  | 170.5171 |
| TPM3         | 2.738172 | 6.665445 | 36.45055 | 1.82E-115 | 1.93E-113 | 252.207  |
| Clorf43      | 1.521593 | 6.375852 | 21.58953 | 3.06E-64  | 3.22E-63  | 134.0488 |
| UBAP2L       | 1.310649 | 5.304369 | 20.26493 | 3.59E-59  | 3.29E-58  | 122.3672 |
| ATP8B2       | 1.315869 | 2.775985 | 15.8899  | 3.08E-42  | 1.94E-41  | 83.37564 |
| UBE2Q1       | 1.254289 | 5.045972 | 18.54102 | 1.64E-52  | 1.28E-51  | 107.025  |
| ADAR         | 1.62722  | 5.101546 | 22.81279 | 7.20E-69  | 8.62E-68  | 144.7177 |
| PMVK         | 1.987442 | 4.641958 | 31.46276 | 1.42E-99  | 5.79E-98  | 215.5351 |
| PBXIP1       | 2.365837 | 4.928204 | 35.22213 | 1.13E-111 | 9.47E-110 | 243.4576 |
| PYG02        | 1.670016 | 3.69805  | 29.7823  | 6.45E-94  | 1.99E-92  | 202.4837 |
| SHC1         | 1.703287 | 5.331573 | 23.1638  | 3.47E-70  | 4.33E-69  | 147.7546 |
| CKS1B        | 2.974268 | 4.667515 | 40.06254 | 3.60E-126 | 7.42E-124 | 276.9088 |
| FLAD1        | 1.768993 | 3.912153 | 29.77654 | 6.75E-94  | 2.07E-92  | 202.4384 |
| ZBTB7B       | 1.049216 | 4.210268 | 14.67104 | 1.47E-37  | 8.45E-37  | 72.6154  |
| P11-307C12.1 | 1.006557 | 0.834836 | 22.45265 | 1.64E-67  | 1.89E-66  | 141.5901 |
| ADAM15       | 2.269344 | 5.589324 | 26.79168 | 1.80E-83  | 3.48E-82  | 178.3887 |
| EFNA4        | 2.570329 | 2.853818 | 39.26862 | 7.14E-124 | 1.25E-121 | 271.6072 |
| EFNA3        | 2.649625 | 1.891512 | 29.56026 | 3.70E-93  | 1.10E-91  | 200.7327 |
| EFNA1        | 1.9704   | 5.711177 | 17.70951 | 2.76E-49  | 2.01E-48  | 99.59738 |
| SLC50A1      | 1.41086  | 5.356593 | 18.45595 | 3.50E-52  | 2.73E-51  | 106.2655 |
| DPM3         | 1.08401  | 5.861901 | 14.16896 | 1.19E-35  | 6.55E-35  | 68.22802 |
| KRTCAP2      | 1.444832 | 7.37557  | 19.50773 | 2.97E-56  | 2.55E-55  | 115.6429 |
| MUC1         | 3.099752 | 8.053449 | 22.85903 | 4.82E-69  | 5.81E-68  | 145.1185 |
| AC234582.1   | 1.620803 | 3.992253 | 9.441981 | 8.21E-19  | 3.18E-18  | 29.61348 |
| MTX1         | 2.00796  | 4.587578 | 34.24502 | 1.33E-108 | 9.21E-107 | 236.3679 |
| GBA          | 2.094875 | 4.611889 | 35.62116 | 6.47E-113 | 5.85E-111 | 246.3196 |
| FAM189B      | 1.499305 | 3.341894 | 23.17235 | 3.22E-70  | 4.03E-69  | 147.8285 |
| SCAMP3       | 1.571231 | 5.340284 | 24.94197 | 8.90E-77  | 1.37E-75  | 162.9499 |
| FDPS         | 1.593706 | 6.389883 | 20.86688 | 1.76E-61  | 1.72E-60  | 127.6903 |
| RUSC1        | 1.796967 | 4.187638 | 25.94522 | 1.98E-80  | 3.44E-79  | 171.3725 |
| YY1AP1       | 1.291484 | 4.682683 | 20.85547 | 1.94E-61  | 1.90E-60  | 127.5896 |
| DAP3         | 1.312522 | 5.65251  | 20.73189 | 5.78E-61  | 5.58E-60  | 126.4985 |
| SYT11        | 2.092597 | 1.840203 | 25.95326 | 1.85E-80  | 3.22E-79  | 171.4395 |
| RIT1         | 1.904424 | 2.944156 | 31.70448 | 2.25E-100 | 9.56E-99  | 217.3833 |
| ARHGEF2      | 2.752398 | 4.09808  | 36.50611 | 1.23E-115 | 1.33E-113 | 252.5984 |

|               |           |           |           |            |            |           |
|---------------|-----------|-----------|-----------|------------|------------|-----------|
| LAMTOR2       | 1. 741372 | 5. 930106 | 24. 77474 | 3. 66E-76  | 5. 52E-75  | 161. 535  |
| RAB25         | 2. 560189 | 5. 953841 | 29. 55679 | 3. 80E-93  | 1. 12E-91  | 200. 7054 |
| LMNA          | 3. 232472 | 6. 613756 | 39. 85696 | 1. 41E-125 | 2. 79E-123 | 275. 5427 |
| SEMA4A        | 1. 555469 | 2. 153701 | 26. 83469 | 1. 26E-83  | 2. 45E-82  | 178. 7429 |
| SLC25A44      | 1. 497005 | 2. 85138  | 29. 22787 | 5. 12E-92  | 1. 44E-90  | 198. 1002 |
| PMF1          | 1. 439325 | 4. 768673 | 24. 34358 | 1. 42E-74  | 2. 03E-73  | 157. 8732 |
| SMG5          | 1. 163793 | 4. 59439  | 16. 97012 | 2. 04E-46  | 1. 40E-45  | 92. 99391 |
| TMEM79        | 1. 310063 | 1. 952248 | 21. 09542 | 2. 35E-62  | 2. 35E-61  | 129. 7053 |
| GLMP          | 2. 281607 | 4. 829248 | 34. 09212 | 4. 07E-108 | 2. 73E-106 | 235. 2479 |
| CCT3          | 1. 867372 | 6. 261246 | 25. 67139 | 1. 95E-79  | 3. 27E-78  | 169. 0849 |
| MEF2D         | 1. 004317 | 3. 947994 | 16. 72486 | 1. 82E-45  | 1. 23E-44  | 90. 80598 |
| IQGAP3        | 2. 453918 | 1. 335362 | 35. 19365 | 1. 38E-111 | 1. 15E-109 | 243. 2526 |
| APOA1BP       | 1. 623487 | 5. 520587 | 25. 86249 | 3. 95E-80  | 6. 79E-79  | 170. 6823 |
| GPATCH4       | 1. 258285 | 3. 774243 | 20. 51788 | 3. 83E-60  | 3. 61E-59  | 124. 6068 |
| P11-284F21.   | 1. 311066 | 0. 727848 | 16. 75901 | 1. 34E-45  | 9. 08E-45  | 91. 11052 |
| P11-284F21. 1 | 2. 050778 | 1. 162933 | 25. 77061 | 8. 50E-80  | 1. 45E-78  | 169. 9148 |
| P11-284F21.   | 1. 466938 | 0. 863107 | 21. 57762 | 3. 40E-64  | 3. 57E-63  | 133. 9443 |
| NES           | 2. 178874 | 2. 602648 | 27. 78605 | 5. 36E-87  | 1. 18E-85  | 186. 5218 |
| CRABP2        | 4. 967754 | 3. 414772 | 35. 95666 | 5. 96E-114 | 5. 80E-112 | 248. 711  |
| ISG20L2       | 1. 635076 | 3. 458572 | 28. 59037 | 8. 22E-90  | 2. 07E-88  | 193. 0124 |
| MRPL24        | 1. 080033 | 5. 888453 | 13. 75812 | 4. 23E-34  | 2. 27E-33  | 64. 66358 |
| HDGF          | 2. 37097  | 6. 406259 | 31. 43849 | 1. 71E-99  | 6. 94E-98  | 215. 3491 |
| PRCC          | 1. 881165 | 4. 623169 | 32. 51776 | 4. 78E-103 | 2. 38E-101 | 223. 548  |
| SH2D2A        | 1. 986267 | 1. 616619 | 30. 09602 | 5. 52E-95  | 1. 79E-93  | 204. 9471 |
| KRT8P45       | 1. 006959 | 0. 977949 | 15. 20656 | 1. 31E-39  | 7. 85E-39  | 77. 3267  |
| ETV3          | 1. 814269 | 2. 327114 | 32. 46591 | 7. 06E-103 | 3. 47E-101 | 223. 1575 |
| FCRL5         | 1. 00256  | 0. 585088 | 13. 06351 | 1. 67E-31  | 8. 48E-31  | 58. 70012 |
| KIRREL        | 2. 271103 | 2. 421447 | 27. 38849 | 1. 36E-85  | 2. 83E-84  | 183. 2844 |
| CD1D          | 1. 091438 | 1. 064424 | 16. 722   | 1. 86E-45  | 1. 26E-44  | 90. 78048 |
| CD1A          | 1. 225378 | 0. 595624 | 19. 00488 | 2. 62E-54  | 2. 14E-53  | 111. 1637 |
| CD1C          | 2. 006863 | 1. 153324 | 22. 40007 | 2. 58E-67  | 2. 96E-66  | 141. 1325 |
| CD1E          | 1. 406015 | 0. 814309 | 19. 44042 | 5. 41E-56  | 4. 61E-55  | 115. 0439 |
| MNDA          | 2. 114175 | 1. 846779 | 22. 11588 | 3. 07E-66  | 3. 41E-65  | 138. 655  |
| IFI16         | 3. 467432 | 4. 524421 | 38. 08654 | 2. 14E-120 | 3. 07E-118 | 263. 5814 |
| ACKR1         | 1. 549823 | 3. 319327 | 9. 675933 | 1. 42E-19  | 5. 61E-19  | 31. 35524 |
| FCER1A        | 1. 988036 | 1. 16318  | 22. 3069  | 5. 81E-67  | 6. 59E-66  | 140. 3211 |
| APCS          | 2. 252249 | 2. 74848  | 10. 29872 | 1. 19E-21  | 4. 93E-21  | 36. 10173 |
| CRP           | 1. 987625 | 3. 858022 | 6. 637155 | 1. 38E-10  | 4. 31E-10  | 10. 89572 |
| DUSP23        | 1. 74598  | 5. 367544 | 16. 01124 | 1. 05E-42  | 6. 67E-42  | 84. 45328 |
| SLAMF8        | 2. 633276 | 2. 03156  | 31. 58642 | 5. 52E-100 | 2. 30E-98  | 216. 4815 |
| CFAP45        | 1. 042039 | 0. 709359 | 16. 01001 | 1. 06E-42  | 6. 74E-42  | 84. 44235 |
| TAGLN2        | 3. 081876 | 8. 043497 | 29. 84831 | 3. 84E-94  | 1. 19E-92  | 203. 0031 |
| IGSF9         | 2. 06073  | 1. 889238 | 22. 5227  | 8. 90E-68  | 1. 03E-66  | 142. 1994 |
| LINC01133     | 4. 29215  | 2. 306662 | 34. 00667 | 7. 60E-108 | 5. 00E-106 | 234. 6208 |
| IGSF8         | 1. 400008 | 4. 379344 | 21. 1412  | 1. 57E-62  | 1. 58E-61  | 130. 1084 |
| PEA15         | 2. 822975 | 5. 417704 | 36. 82715 | 1. 30E-116 | 1. 48E-114 | 254. 8532 |
| PEX19         | 1. 626796 | 3. 720599 | 27. 69063 | 1. 16E-86  | 2. 53E-85  | 185. 7465 |
| COPA          | 1. 531048 | 5. 047068 | 22. 79926 | 8. 09E-69  | 9. 68E-68  | 144. 6005 |
| SUMO1P3       | 1. 549145 | 1. 173656 | 21. 37745 | 1. 97E-63  | 2. 02E-62  | 132. 1867 |
| NCSTN         | 1. 224012 | 5. 565973 | 18. 82324 | 1. 32E-53  | 1. 06E-52  | 109. 5438 |
| SLAMF6        | 1. 649898 | 1. 062109 | 21. 13016 | 1. 73E-62  | 1. 73E-61  | 130. 0112 |
| CD48          | 3. 030309 | 2. 228749 | 26. 68201 | 4. 44E-83  | 8. 47E-82  | 177. 4844 |
| SLAMF7        | 2. 457406 | 1. 437582 | 30. 56374 | 1. 44E-96  | 5. 05E-95  | 208. 5968 |
| LY9           | 1. 233485 | 0. 772634 | 16. 17943 | 2. 34E-43  | 1. 51E-42  | 85. 94826 |



|          |           |           |           |            |            |           |
|----------|-----------|-----------|-----------|------------|------------|-----------|
| ITLN1    | 1. 274719 | 0. 952291 | 7. 64166  | 2. 56E-13  | 8. 68E-13  | 17. 09066 |
| F11R     | 2. 163904 | 5. 064371 | 28. 06818 | 5. 47E-88  | 1. 26E-86  | 188. 8076 |
| TSTD1    | 1. 02348  | 5. 789625 | 13. 39359 | 9. 84E-33  | 5. 14E-32  | 61. 52333 |
| USF1     | 1. 114352 | 4. 981537 | 16. 68476 | 2. 60E-45  | 1. 75E-44  | 90. 44847 |
| ARHGAP30 | 2. 255414 | 2. 017928 | 27. 47388 | 6. 76E-86  | 1. 43E-84  | 183. 9814 |
| PVRL4    | 3. 044362 | 2. 970993 | 32. 5532  | 3. 66E-103 | 1. 83E-101 | 223. 8148 |
| PFDN2    | 2. 671126 | 5. 413789 | 38. 18074 | 1. 13E-120 | 1. 65E-118 | 264. 2268 |
| DEDD     | 1. 481854 | 4. 022018 | 25. 71991 | 1. 30E-79  | 2. 20E-78  | 169. 4909 |
| UFC1     | 1. 075494 | 6. 525251 | 15. 06912 | 4. 41E-39  | 2. 62E-38  | 76. 1148  |
| ADAMTS4  | 1. 735062 | 2. 19911  | 15. 56687 | 5. 41E-41  | 3. 32E-40  | 80. 51173 |
| NDUFS2   | 1. 071818 | 5. 589886 | 16. 42594 | 2. 61E-44  | 1. 72E-43  | 88. 14214 |
| FCER1G   | 3. 237217 | 4. 725294 | 28. 05717 | 5. 98E-88  | 1. 37E-86  | 188. 7185 |
| TOMM40L  | 1. 652219 | 2. 266212 | 33. 97215 | 9. 79E-108 | 6. 38E-106 | 234. 3672 |
| SDHC     | 2. 005867 | 6. 039599 | 29. 36779 | 1. 69E-92  | 4. 84E-91  | 199. 21   |
| FCGR2A   | 2. 994108 | 3. 370243 | 24. 63877 | 1. 16E-75  | 1. 72E-74  | 160. 3824 |
| HSPA6    | 1. 813522 | 1. 793581 | 13. 46636 | 5. 26E-33  | 2. 76E-32  | 62. 14842 |
| FCGR3A   | 3. 529495 | 3. 34238  | 29. 23003 | 5. 04E-92  | 1. 41E-90  | 198. 1173 |
| FCGR2B   | 2. 875467 | 2. 192125 | 28. 55189 | 1. 12E-89  | 2. 79E-88  | 192. 7038 |
| HSPA7    | 1. 417516 | 1. 917454 | 12. 25046 | 1. 62E-28  | 7. 76E-28  | 51. 84153 |
| FCGR3B   | 1. 283081 | 0. 952288 | 13. 69247 | 7. 46E-34  | 3. 98E-33  | 64. 09638 |
| FCRLA    | 1. 004567 | 0. 525473 | 10. 28712 | 1. 31E-21  | 5. 39E-21  | 36. 01196 |
| OLFML2B  | 4. 37636  | 2. 822742 | 46. 11165 | 1. 03E-142 | 8. 54E-140 | 315. 0934 |
| UHMK1    | 1. 91314  | 2. 990645 | 33. 37408 | 8. 04E-106 | 4. 71E-104 | 229. 9499 |
| DDR2     | 2. 10508  | 2. 027806 | 23. 86374 | 8. 48E-73  | 1. 14E-71  | 153. 7748 |
| RGS4     | 2. 056405 | 1. 892073 | 19. 63736 | 9. 39E-57  | 8. 16E-56  | 116. 796  |
| RGS5     | 2. 388608 | 3. 970132 | 22. 01787 | 7. 22E-66  | 7. 94E-65  | 137. 799  |
| NUF2     | 2. 080874 | 1. 188391 | 38. 11473 | 1. 77E-120 | 2. 57E-118 | 263. 7747 |
| MGST3    | 2. 200681 | 6. 352292 | 29. 62308 | 2. 26E-93  | 6. 74E-92  | 201. 2287 |
| ALDH9A1  | 1. 243521 | 4. 449374 | 20. 41382 | 9. 60E-60  | 8. 96E-59  | 123. 6859 |
| TMC01    | 2. 365582 | 5. 467184 | 36. 02689 | 3. 62E-114 | 3. 60E-112 | 249. 2099 |
| UCK2     | 1. 474136 | 3. 960674 | 24. 2914  | 2. 21E-74  | 3. 15E-73  | 157. 4286 |
| POGK     | 1. 572665 | 3. 138116 | 28. 4438  | 2. 66E-89  | 6. 53E-88  | 191. 8356 |
| TADA1    | 1. 080221 | 2. 284425 | 23. 15063 | 3. 88E-70  | 4. 84E-69  | 147. 6409 |
| GPA33    | 1. 511438 | 0. 753813 | 16. 89686 | 3. 92E-46  | 2. 68E-45  | 92. 34019 |
| CD247    | 1. 874118 | 1. 30697  | 23. 86442 | 8. 43E-73  | 1. 14E-71  | 153. 7806 |
| CREG1    | 1. 431097 | 5. 364376 | 21. 00826 | 5. 05E-62  | 5. 01E-61  | 128. 9372 |
| RCSD1    | 2. 087055 | 1. 671985 | 23. 15055 | 3. 89E-70  | 4. 84E-69  | 147. 6402 |
| MPZL1    | 2. 702658 | 4. 884673 | 37. 31279 | 4. 42E-118 | 5. 50E-116 | 258. 2409 |
| MPC2     | 1. 642851 | 5. 06858  | 23. 91453 | 5. 49E-73  | 7. 45E-72  | 154. 2098 |
| DCAF6    | 1. 737484 | 4. 074149 | 30. 91624 | 9. 45E-98  | 3. 50E-96  | 211. 3294 |
| GCSHP5   | 1. 271291 | 3. 117969 | 20. 54159 | 3. 10E-60  | 2. 93E-59  | 124. 8165 |
| TIPRL    | 1. 50837  | 3. 310301 | 28. 65423 | 4. 93E-90  | 1. 26E-88  | 193. 5244 |
| SFT2D2   | 1. 427169 | 2. 390171 | 31. 28228 | 5. 66E-99  | 2. 23E-97  | 214. 1504 |
| ATP1B1   | 2. 680777 | 6. 477005 | 27. 34709 | 1. 90E-85  | 3. 95E-84  | 182. 9462 |
| NME7     | 2. 049173 | 3. 163768 | 28. 26165 | 1. 15E-88  | 2. 73E-87  | 190. 3694 |
| BLZF1    | 1. 765872 | 2. 817019 | 29. 96888 | 1. 49E-94  | 4. 74E-93  | 203. 9502 |
| F5       | 3. 174478 | 2. 345271 | 22. 96841 | 1. 87E-69  | 2. 28E-68  | 146. 0656 |
| SELP     | 1. 91422  | 1. 748994 | 18. 42725 | 4. 53E-52  | 3. 52E-51  | 106. 0092 |
| Clorf112 | 1. 228046 | 1. 409354 | 31. 03478 | 3. 79E-98  | 1. 44E-96  | 212. 2447 |
| SELL     | 2. 60099  | 1. 670991 | 24. 64201 | 1. 12E-75  | 1. 67E-74  | 160. 4099 |
| METTL18  | 1. 321052 | 2. 109641 | 28. 21118 | 1. 73E-88  | 4. 06E-87  | 189. 9624 |
| SCYL3    | 1. 007196 | 2. 32935  | 18. 83306 | 1. 21E-53  | 9. 75E-53  | 109. 6313 |
| KIFAP3   | 1. 636824 | 3. 393682 | 28. 262   | 1. 15E-88  | 2. 72E-87  | 190. 3722 |
| PRRX1    | 3. 062256 | 2. 575321 | 29. 27628 | 3. 49E-92  | 9. 86E-91  | 198. 4844 |

|              |           |           |           |            |            |           |
|--------------|-----------|-----------|-----------|------------|------------|-----------|
| FM01         | 1. 437042 | 1. 576491 | 16. 37892 | 3. 97E-44  | 2. 60E-43  | 87. 72346 |
| PRRC2C       | 1. 403714 | 4. 552213 | 20. 56959 | 2. 42E-60  | 2. 30E-59  | 125. 0641 |
| METTL13      | 1. 746507 | 3. 511836 | 32. 88977 | 2. 95E-104 | 1. 57E-102 | 226. 3404 |
| DNM3         | 1. 178471 | 0. 947831 | 26. 25974 | 1. 45E-81  | 2. 62E-80  | 173. 9893 |
| PIGC         | 1. 472557 | 4. 169648 | 25. 50182 | 8. 04E-79  | 1. 32E-77  | 167. 664  |
| TNFSF4       | 1. 630096 | 1. 078979 | 24. 81261 | 2. 65E-76  | 4. 04E-75  | 161. 8557 |
| KLHL20       | 1. 349517 | 2. 443899 | 24. 03483 | 1. 97E-73  | 2. 71E-72  | 155. 2388 |
| CENPL        | 1. 390643 | 1. 183516 | 35. 61116 | 6. 95E-113 | 6. 23E-111 | 246. 2481 |
| DARS2        | 1. 546409 | 2. 484937 | 30. 32648 | 9. 13E-96  | 3. 06E-94  | 206. 7489 |
| RABGAP1L     | 1. 793823 | 3. 604381 | 32. 42542 | 9. 57E-103 | 4. 66E-101 | 222. 8522 |
| CACYBP       | 1. 823165 | 4. 689879 | 25. 08053 | 2. 77E-77  | 4. 34E-76  | 164. 1199 |
| MRPS14       | 1. 150824 | 3. 808661 | 22. 40746 | 2. 42E-67  | 2. 78E-66  | 141. 1968 |
| KIAA0040     | 1. 074723 | 3. 678409 | 11. 97666 | 1. 59E-27  | 7. 46E-27  | 49. 56648 |
| RFWD2        | 1. 851727 | 4. 130493 | 33. 54404 | 2. 29E-106 | 1. 37E-104 | 231. 2097 |
| P11-568K15.  | 1. 531256 | 3. 017097 | 21. 11581 | 1. 96E-62  | 1. 96E-61  | 129. 8848 |
| RASAL2       | 1. 361677 | 2. 118761 | 20. 58468 | 2. 12E-60  | 2. 02E-59  | 125. 1975 |
| RP4-765C7. 2 | -1. 67313 | 1. 242736 | -8. 8805  | 5. 03E-17  | 1. 87E-16  | 25. 53333 |
| RALGPS2      | 1. 483591 | 2. 099243 | 25. 37103 | 2. 41E-78  | 3. 91E-77  | 166. 5659 |
| FAM20B       | 1. 730047 | 2. 923347 | 34. 08858 | 4. 17E-108 | 2. 79E-106 | 235. 222  |
| TOR3A        | 1. 541571 | 3. 887343 | 28. 31406 | 7. 55E-89  | 1. 81E-87  | 190. 7917 |
| ABL2         | 1. 181506 | 1. 96131  | 21. 08363 | 2. 60E-62  | 2. 60E-61  | 129. 6014 |
| SOAT1        | 1. 04037  | 3. 04056  | 14. 57124 | 3. 52E-37  | 2. 01E-36  | 71. 7408  |
| TOR1AIP2     | 1. 165266 | 3. 22353  | 21. 43126 | 1. 23E-63  | 1. 27E-62  | 132. 6595 |
| TOR1AIP1     | 1. 322107 | 3. 763739 | 20. 328   | 2. 05E-59  | 1. 90E-58  | 122. 926  |
| CEP350       | 1. 04674  | 2. 637926 | 20. 26673 | 3. 53E-59  | 3. 24E-58  | 122. 3831 |
| QSOX1        | 2. 471791 | 6. 384753 | 29. 29098 | 3. 11E-92  | 8. 80E-91  | 198. 6011 |
| ACBD6        | 1. 124145 | 4. 481846 | 19. 76839 | 2. 93E-57  | 2. 58E-56  | 117. 9608 |
| XPR1         | 1. 252784 | 2. 742719 | 19. 94714 | 6. 00E-58  | 5. 35E-57  | 119. 5485 |
| STX6         | 2. 366454 | 2. 560062 | 48. 06836 | 1. 00E-147 | 1. 14E-144 | 326. 6637 |
| MR1          | 2. 567177 | 2. 418505 | 44. 24819 | 8. 62E-138 | 4. 50E-135 | 303. 7312 |
| IER5         | 2. 165144 | 2. 557241 | 31. 37846 | 2. 71E-99  | 1. 08E-97  | 214. 8888 |
| RNASEL       | 1. 716849 | 1. 959552 | 33. 48094 | 3. 64E-106 | 2. 18E-104 | 230. 7424 |
| RGS16        | 2. 233013 | 2. 838156 | 20. 82017 | 2. 65E-61  | 2. 58E-60  | 127. 2781 |
| NPL          | 2. 115092 | 2. 277812 | 31. 34255 | 3. 56E-99  | 1. 42E-97  | 214. 6132 |
| DHX9         | 1. 679067 | 5. 220148 | 27. 63219 | 1. 87E-86  | 4. 04E-85  | 185. 2712 |
| LAMC1        | 2. 290648 | 4. 369364 | 27. 60181 | 2. 39E-86  | 5. 14E-85  | 185. 0239 |
| LAMC2        | 6. 082459 | 3. 968474 | 57. 7057  | 2. 53E-170 | 1. 70E-166 | 378. 8265 |
| SMG7         | 1. 327972 | 3. 813808 | 23. 38476 | 5. 17E-71  | 6. 59E-70  | 149. 6603 |
| NCF2         | 2. 972146 | 2. 65523  | 30. 0973  | 5. 46E-95  | 1. 77E-93  | 204. 9571 |
| ARPC5        | 2. 891564 | 5. 797837 | 39. 97235 | 6. 55E-126 | 1. 34E-123 | 276. 31   |
| RGL1         | 1. 377986 | 2. 06167  | 19. 40631 | 7. 33E-56  | 6. 22E-55  | 114. 7403 |
| TSEN15       | 1. 526201 | 3. 395934 | 28. 16418 | 2. 52E-88  | 5. 89E-87  | 189. 5831 |
| Clorf21      | 2. 051117 | 3. 524635 | 24. 31849 | 1. 75E-74  | 2. 50E-73  | 157. 6595 |
| RNF2         | 1. 47487  | 2. 546937 | 24. 90634 | 1. 20E-76  | 1. 85E-75  | 162. 6487 |
| TRMT1L       | 1. 271495 | 2. 278414 | 25. 09614 | 2. 43E-77  | 3. 81E-76  | 164. 2516 |
| IVNS1ABP     | 1. 348932 | 5. 273711 | 17. 17597 | 3. 24E-47  | 2. 27E-46  | 94. 83151 |
| HMCN1        | 2. 142664 | 1. 553881 | 19. 5978  | 1. 34E-56  | 1. 16E-55  | 116. 4442 |
| PRG4         | 1. 183831 | 0. 938912 | 15. 54966 | 6. 30E-41  | 3. 86E-40  | 80. 35936 |
| TPR          | 1. 579765 | 4. 271238 | 25. 77111 | 8. 46E-80  | 1. 44E-78  | 169. 919  |
| PTGS2        | 2. 675161 | 1. 516321 | 23. 19091 | 2. 74E-70  | 3. 44E-69  | 147. 9887 |
| PLA2G4A      | 1. 747672 | 2. 017897 | 23. 93181 | 4. 74E-73  | 6. 44E-72  | 154. 3576 |
| RGS1         | 3. 413459 | 4. 169211 | 24. 59777 | 1. 64E-75  | 2. 42E-74  | 160. 0344 |
| TROVE2       | 1. 269767 | 2. 334847 | 21. 24946 | 6. 05E-63  | 6. 16E-62  | 131. 0612 |
| P11-101E13.  | 1. 422358 | 3. 645326 | 23. 99661 | 2. 72E-73  | 3. 74E-72  | 154. 9121 |

|               |           |           |           |            |            |           |
|---------------|-----------|-----------|-----------|------------|------------|-----------|
| GLRX2         | 1. 878881 | 3. 02116  | 32. 60634 | 2. 46E-103 | 1. 25E-101 | 224. 2145 |
| CDC73         | 1. 655286 | 2. 680019 | 30. 89714 | 1. 09E-97  | 4. 05E-96  | 211. 1817 |
| CFH           | 3. 237367 | 3. 888435 | 32. 47951 | 6. 37E-103 | 3. 15E-101 | 223. 26   |
| ASPM          | 1. 750822 | 0. 917253 | 35. 75059 | 2. 57E-113 | 2. 38E-111 | 247. 2438 |
| ZBTB41        | 1. 047308 | 1. 605106 | 23. 06948 | 7. 82E-70  | 9. 65E-69  | 146. 9397 |
| Clorf53       | 1. 404495 | 1. 722828 | 24. 70134 | 6. 80E-76  | 1. 02E-74  | 160. 9131 |
| NEK7          | 1. 692782 | 3. 507921 | 15. 37147 | 3. 05E-40  | 1. 85E-39  | 78. 7831  |
| PTPRC         | 2. 411224 | 2. 291457 | 20. 73184 | 5. 78E-61  | 5. 58E-60  | 126. 4981 |
| NR5A2         | -1. 72273 | 3. 385963 | -16. 9745 | 1. 96E-46  | 1. 35E-45  | 93. 03293 |
| ZNF281        | 1. 3756   | 1. 936743 | 24. 34332 | 1. 42E-74  | 2. 03E-73  | 157. 871  |
| CAMSAP2       | 1. 860009 | 2. 163464 | 32. 07653 | 1. 33E-101 | 6. 05E-100 | 220. 2137 |
| Clorf106      | 3. 329124 | 4. 247533 | 36. 49611 | 1. 32E-115 | 1. 42E-113 | 252. 528  |
| KIF21B        | 1. 079828 | 0. 923432 | 22. 30262 | 6. 03E-67  | 6. 84E-66  | 140. 2837 |
| TMEM9         | 1. 562104 | 5. 358036 | 25. 36178 | 2. 60E-78  | 4. 23E-77  | 166. 4882 |
| IGFN1         | -2. 73265 | 1. 946488 | -28. 7307 | 2. 68E-90  | 6. 92E-89  | 194. 1367 |
| PKP1          | 1. 671737 | 1. 032062 | 16. 57446 | 6. 95E-45  | 4. 63E-44  | 89. 46528 |
| LAD1          | 2. 924007 | 5. 808533 | 34. 12764 | 3. 13E-108 | 2. 12E-106 | 235. 5084 |
| RP11-27G14. 4 | 1. 271872 | 1. 501519 | 20. 8718  | 1. 68E-61  | 1. 64E-60  | 127. 7337 |
| PHLDA3        | 2. 64346  | 4. 526587 | 30. 41798 | 4. 48E-96  | 1. 53E-94  | 207. 4624 |
| CSRP1         | 2. 172694 | 6. 452788 | 25. 54822 | 5. 45E-79  | 9. 04E-78  | 168. 0532 |
| NAV1          | 1. 581631 | 2. 186403 | 23. 16487 | 3. 43E-70  | 4. 29E-69  | 147. 7639 |
| IPO9          | 1. 277498 | 3. 709051 | 24. 08879 | 1. 24E-73  | 1. 72E-72  | 155. 6999 |
| SHISA4        | 1. 526924 | 3. 360383 | 23. 66637 | 4. 60E-72  | 6. 05E-71  | 152. 0821 |
| LMOD1         | 1. 610277 | 2. 684756 | 15. 06065 | 4. 76E-39  | 2. 82E-38  | 76. 04023 |
| TIMM17A       | 1. 765753 | 4. 313667 | 31. 41006 | 2. 13E-99  | 8. 58E-98  | 215. 1312 |
| RNPEP         | 1. 569517 | 4. 904556 | 25. 89759 | 2. 95E-80  | 5. 08E-79  | 170. 9752 |
| RP11-465N4. 4 | 1. 693202 | 1. 721635 | 23. 82595 | 1. 17E-72  | 1. 58E-71  | 153. 4511 |
| ELF3          | 2. 341998 | 7. 666578 | 18. 46959 | 3. 10E-52  | 2. 42E-51  | 106. 3872 |
| ARL8A         | 2. 067688 | 4. 482804 | 34. 98536 | 6. 18E-111 | 4. 96E-109 | 241. 7503 |
| PTPN7         | 1. 874961 | 1. 4645   | 23. 53895 | 1. 37E-71  | 1. 78E-70  | 150. 9873 |
| LGR6          | 2. 124072 | 1. 154828 | 23. 19514 | 2. 64E-70  | 3. 32E-69  | 148. 0252 |
| UBE2T         | 3. 350371 | 2. 028951 | 53. 76393 | 1. 79E-161 | 6. 36E-158 | 358. 3998 |
| PPP1R12B      | 1. 131395 | 2. 697191 | 14. 16356 | 1. 25E-35  | 6. 87E-35  | 68. 18104 |
| RP11-175B9. 3 | -1. 9612  | 2. 746808 | -22. 2104 | 1. 35E-66  | 1. 51E-65  | 139. 4801 |
| KDM5B         | 1. 728997 | 3. 300849 | 28. 22376 | 1. 56E-88  | 3. 68E-87  | 190. 0638 |
| PCAT6         | 1. 333324 | 1. 723109 | 24. 41864 | 7. 48E-75  | 1. 08E-73  | 158. 5121 |
| RABIF         | 1. 886373 | 2. 030164 | 46. 15191 | 8. 10E-143 | 6. 81E-140 | 315. 3351 |
| KLHL12        | 1. 152549 | 3. 283789 | 23. 07423 | 7. 51E-70  | 9. 27E-69  | 146. 9808 |
| ADIPOR1       | 1. 43286  | 5. 39217  | 22. 84842 | 5. 29E-69  | 6. 37E-68  | 145. 0266 |
| TMEM183A      | 1. 163011 | 4. 621504 | 20. 45237 | 6. 83E-60  | 6. 39E-59  | 124. 0271 |
| CHI3L1        | 1. 557894 | 3. 40711  | 10. 0746  | 6. 78E-21  | 2. 76E-20  | 34. 37594 |
| CHIT1         | 2. 806429 | 1. 572442 | 18. 9492  | 4. 30E-54  | 3. 50E-53  | 110. 6673 |
| BTG2          | -1. 48394 | 6. 354103 | -10. 9977 | 4. 74E-24  | 2. 06E-23  | 41. 60168 |
| FMOD          | 2. 715029 | 3. 935411 | 30. 98782 | 5. 44E-98  | 2. 05E-96  | 211. 8823 |
| PRELP         | 2. 173715 | 3. 458297 | 18. 50141 | 2. 34E-52  | 1. 82E-51  | 106. 6714 |
| ATP2B4        | 2. 32936  | 3. 874726 | 25. 12278 | 1. 94E-77  | 3. 06E-76  | 164. 4762 |
| ZC3H11A       | 1. 077175 | 5. 031925 | 16. 21862 | 1. 65E-43  | 1. 07E-42  | 86. 2969  |
| SNRPE         | 1. 748052 | 5. 948294 | 24. 4505  | 5. 71E-75  | 8. 30E-74  | 158. 7831 |
| PLEKHA6       | 2. 266211 | 3. 257412 | 27. 27774 | 3. 35E-85  | 6. 88E-84  | 182. 3792 |
| PPP1R15B      | 1. 066426 | 3. 684532 | 17. 66152 | 4. 23E-49  | 3. 08E-48  | 99. 16861 |
| PIK3C2B       | 1. 896098 | 2. 527359 | 29. 63894 | 1. 99E-93  | 5. 97E-92  | 201. 3539 |
| LRRN2         | 1. 06754  | 1. 314358 | 16. 28618 | 9. 07E-44  | 5. 90E-43  | 86. 89795 |
| RBBP5         | 1. 17371  | 2. 229529 | 27. 57912 | 2. 87E-86  | 6. 16E-85  | 184. 8391 |
| LEMD1         | 3. 868207 | 1. 936901 | 33. 97853 | 9. 34E-108 | 6. 11E-106 | 234. 4141 |

|               |           |           |           |            |            |           |
|---------------|-----------|-----------|-----------|------------|------------|-----------|
| BLACAT1       | 2. 205633 | 1. 148121 | 30. 3684  | 6. 59E-96  | 2. 22E-94  | 207. 0759 |
| MFS4          | 1. 651951 | 2. 152684 | 18. 16013 | 4. 92E-51  | 3. 73E-50  | 103. 6234 |
| ELK4          | 1. 115703 | 2. 615759 | 20. 45887 | 6. 45E-60  | 6. 04E-59  | 124. 0846 |
| SLC45A3       | 3. 220586 | 2. 157447 | 38. 99349 | 4. 54E-123 | 7. 69E-121 | 269. 7533 |
| NUCKS1        | 1. 818314 | 4. 800589 | 25. 48285 | 9. 42E-79  | 1. 55E-77  | 167. 5049 |
| RAB29         | 1. 701276 | 2. 910172 | 29. 90597 | 2. 44E-94  | 7. 66E-93  | 203. 4562 |
| PM20D1        | -3. 71005 | 2. 707189 | -23. 9735 | 3. 32E-73  | 4. 54E-72  | 154. 7143 |
| SLC26A9       | 2. 06177  | 2. 037123 | 15. 26471 | 7. 85E-40  | 4. 72E-39  | 77. 84001 |
| RAB7B         | 2. 319834 | 1. 626092 | 33. 91051 | 1. 54E-107 | 9. 94E-106 | 233. 914  |
| CTSE          | 7. 249179 | 4. 457235 | 46. 89303 | 9. 83E-145 | 9. 01E-142 | 319. 7572 |
| Clorf186      | 1. 684495 | 1. 784413 | 15. 96265 | 1. 61E-42  | 1. 02E-41  | 84. 0216  |
| FAM72A        | 1. 542538 | 1. 076439 | 41. 30442 | 1. 06E-129 | 2. 92E-127 | 285. 0619 |
| SRGAP2        | 1. 937134 | 3. 042967 | 27. 41289 | 1. 11E-85  | 2. 33E-84  | 183. 4836 |
| IKBKE         | 1. 936253 | 2. 134734 | 35. 52812 | 1. 26E-112 | 1. 11E-110 | 245. 654  |
| RASSF5        | 1. 636255 | 3. 329234 | 22. 7247  | 1. 54E-68  | 1. 83E-67  | 143. 9538 |
| DYRK3         | 1. 092443 | 1. 708211 | 21. 86005 | 2. 87E-65  | 3. 11E-64  | 136. 4189 |
| MAPKAPK2      | 1. 785489 | 5. 204851 | 26. 97212 | 4. 09E-84  | 8. 09E-83  | 179. 8733 |
| RP11-343H5. 4 | -2. 14573 | 1. 550154 | -10. 4564 | 3. 48E-22  | 1. 45E-21  | 37. 32731 |
| FCMR          | 2. 007067 | 1. 801145 | 18. 25841 | 2. 04E-51  | 1. 56E-50  | 104. 5013 |
| PIGR          | 4. 183245 | 4. 264315 | 24. 36436 | 1. 19E-74  | 1. 71E-73  | 158. 0501 |
| Clorf116      | 2. 518702 | 3. 490465 | 30. 2572  | 1. 57E-95  | 5. 20E-94  | 206. 2079 |
| PFKFB2        | 1. 230198 | 2. 638872 | 14. 29689 | 3. 89E-36  | 2. 17E-35  | 69. 34287 |
| YOD1          | 1. 150608 | 1. 640844 | 22. 95235 | 2. 15E-69  | 2. 62E-68  | 145. 9265 |
| C4BPB         | 1. 491598 | 2. 898349 | 9. 71641  | 1. 05E-19  | 4. 15E-19  | 31. 65895 |
| C4BPA         | 1. 040335 | 2. 258685 | 6. 303093 | 9. 75E-10  | 2. 96E-09  | 8. 980361 |
| CD55          | 4. 169586 | 4. 798204 | 37. 18526 | 1. 07E-117 | 1. 30E-115 | 257. 3539 |
| CR2           | 1. 522313 | 0. 770374 | 10. 20974 | 2. 39E-21  | 9. 79E-21  | 35. 41424 |
| CD46          | 1. 054262 | 6. 116095 | 13. 08117 | 1. 43E-31  | 7. 31E-31  | 58. 85062 |
| Clorf132      | -1. 05909 | 1. 169137 | -16. 2744 | 1. 01E-43  | 6. 55E-43  | 86. 79349 |
| CD34          | 1. 636242 | 3. 704155 | 19. 30407 | 1. 82E-55  | 1. 53E-54  | 113. 8299 |
| MIR205HG      | 1. 123849 | 0. 706292 | 7. 889581 | 4. 95E-14  | 1. 71E-13  | 18. 71348 |
| LAMB3         | 6. 328244 | 4. 226407 | 60. 80511 | 6. 14E-177 | 7. 43E-173 | 394. 0948 |
| GOS2          | 2. 111638 | 3. 878857 | 14. 5572  | 3. 99E-37  | 2. 27E-36  | 71. 6179  |
| HSD11B1       | 2. 474844 | 1. 926148 | 26. 28528 | 1. 18E-81  | 2. 13E-80  | 174. 2013 |
| TRAF3IP3      | 1. 893551 | 1. 746607 | 19. 80626 | 2. 10E-57  | 1. 85E-56  | 118. 2973 |
| IRF6          | 2. 0663   | 3. 90288  | 26. 43583 | 3. 38E-82  | 6. 25E-81  | 175. 4493 |
| DIEXF         | 1. 133634 | 1. 729696 | 25. 28935 | 4. 78E-78  | 7. 69E-77  | 165. 8791 |
| SERTAD4-AS1   | 2. 179059 | 1. 52442  | 31. 30283 | 4. 83E-99  | 1. 92E-97  | 214. 3082 |
| SERTAD4       | 1. 743941 | 0. 961433 | 29. 94246 | 1. 83E-94  | 5. 78E-93  | 203. 7429 |
| HHAT          | 1. 269702 | 1. 47115  | 28. 7932  | 1. 63E-90  | 4. 24E-89  | 194. 6366 |
| LINC00467     | 1. 198715 | 2. 349657 | 20. 85069 | 2. 03E-61  | 1. 98E-60  | 127. 5475 |
| SLC30A1       | 1. 86319  | 2. 632129 | 28. 5851  | 8. 58E-90  | 2. 16E-88  | 192. 9701 |
| NEK2          | 2. 521411 | 1. 316296 | 38. 77215 | 2. 02E-122 | 3. 33E-120 | 268. 2558 |
| LPGAT1        | 1. 221745 | 3. 299266 | 20. 81815 | 2. 70E-61  | 2. 63E-60  | 127. 2603 |
| INTS7         | 1. 368686 | 2. 327841 | 29. 27599 | 3. 50E-92  | 9. 88E-91  | 198. 4821 |
| DTL           | 1. 760656 | 1. 021567 | 34. 04735 | 5. 64E-108 | 3. 75E-106 | 234. 9195 |
| TMEM206       | 1. 184537 | 1. 859523 | 27. 16921 | 8. 13E-85  | 1. 64E-83  | 181. 4906 |
| NENF          | 1. 57803  | 5. 508948 | 24. 71555 | 6. 03E-76  | 9. 05E-75  | 161. 0335 |
| ATF3          | 1. 025155 | 4. 285118 | 7. 124136 | 7. 07E-12  | 2. 30E-11  | 13. 82019 |
| BATF3         | 1. 7888   | 1. 523353 | 28. 68808 | 3. 76E-90  | 9. 68E-89  | 193. 7955 |
| NSL1          | 1. 808438 | 2. 79136  | 34. 46606 | 2. 66E-109 | 1. 92E-107 | 237. 9819 |
| FLVCR1-AS1    | 1. 039787 | 1. 179291 | 16. 04144 | 8. 00E-43  | 5. 11E-42  | 84. 72163 |
| FLVCR1        | 1. 179892 | 1. 708666 | 23. 92973 | 4. 83E-73  | 6. 55E-72  | 154. 3398 |
| SMYD2         | 1. 162261 | 3. 933838 | 20. 48512 | 5. 11E-60  | 4. 81E-59  | 124. 3169 |

|             |           |           |           |            |            |           |
|-------------|-----------|-----------|-----------|------------|------------|-----------|
| PTPN14      | 1. 050396 | 1. 847566 | 14. 41063 | 1. 44E-36  | 8. 09E-36  | 70. 3359  |
| CENPF       | 3. 185568 | 1. 893334 | 31. 35368 | 3. 27E-99  | 1. 30E-97  | 214. 6987 |
| KCTD3       | 1. 212577 | 4. 084723 | 18. 67713 | 4. 87E-53  | 3. 86E-52  | 108. 24   |
| GPATCH2     | 1. 124837 | 2. 00944  | 24. 11845 | 9. 63E-74  | 1. 34E-72  | 155. 9533 |
| SPATA17     | 1. 030634 | 0. 810594 | 19. 25456 | 2. 83E-55  | 2. 37E-54  | 113. 3889 |
| RRP15       | 1. 298473 | 2. 164695 | 22. 6098  | 4. 18E-68  | 4. 90E-67  | 142. 9563 |
| TGFB2       | 2. 135882 | 2. 057422 | 20. 67702 | 9. 38E-61  | 9. 00E-60  | 126. 0138 |
| TGFB2-OT1   | 2. 016442 | 1. 776151 | 21. 12117 | 1. 87E-62  | 1. 88E-61  | 129. 932  |
| P11-392017. | -2. 22628 | 1. 571332 | -19. 2161 | 3. 99E-55  | 3. 33E-54  | 113. 0463 |
| EPRS        | 1. 254583 | 4. 953318 | 21. 10699 | 2. 12E-62  | 2. 12E-61  | 129. 8071 |
| BPNT1       | 2. 563313 | 3. 122798 | 41. 96863 | 1. 46E-131 | 4. 81E-129 | 289. 3539 |
| IARS2       | 1. 596621 | 4. 320185 | 25. 9706  | 1. 60E-80  | 2. 79E-79  | 171. 5841 |
| RAB3GAP2    | 1. 111348 | 2. 599253 | 21. 74725 | 7. 69E-65  | 8. 23E-64  | 135. 4314 |
| MORF4L1P1   | 1. 65679  | 3. 305118 | 22. 37697 | 3. 16E-67  | 3. 61E-66  | 140. 9314 |
| Clorf115    | 1. 050255 | 2. 920956 | 15. 61432 | 3. 55E-41  | 2. 19E-40  | 80. 932   |
| HLX         | 2. 1768   | 2. 52724  | 28. 06052 | 5. 82E-88  | 1. 34E-86  | 188. 7457 |
| DUSP10      | 1. 387457 | 2. 943726 | 16. 52113 | 1. 12E-44  | 7. 41E-44  | 88. 99006 |
| P11-400N13. | 1. 772667 | 0. 851854 | 22. 1369  | 2. 56E-66  | 2. 85E-65  | 138. 8385 |
| TAF1A       | 1. 197071 | 1. 649535 | 22. 85913 | 4. 82E-69  | 5. 81E-68  | 145. 1193 |
| AIDA        | 1. 812479 | 4. 397142 | 29. 69034 | 1. 33E-93  | 4. 01E-92  | 201. 7593 |
| BROX        | 1. 976015 | 3. 314623 | 35. 21927 | 1. 15E-111 | 9. 64E-110 | 243. 4371 |
| FAM177B     | 2. 138137 | 1. 166968 | 18. 50207 | 2. 32E-52  | 1. 81E-51  | 106. 6772 |
| P11-452F19. | 1. 3483   | 2. 991309 | 21. 04018 | 3. 82E-62  | 3. 79E-61  | 129. 2185 |
| DISP1       | 1. 117381 | 1. 442365 | 25. 75676 | 9. 54E-80  | 1. 62E-78  | 169. 7991 |
| TLR5        | 1. 121407 | 1. 908009 | 11. 69504 | 1. 63E-26  | 7. 48E-26  | 47. 24694 |
| CAPN8       | 4. 728102 | 3. 753715 | 29. 41489 | 1. 17E-92  | 3. 36E-91  | 199. 5831 |
| CAPN2       | 2. 492008 | 5. 979516 | 32. 26839 | 3. 13E-102 | 1. 48E-100 | 221. 6665 |
| TP53BP2     | 1. 614661 | 3. 117559 | 27. 60649 | 2. 30E-86  | 4. 95E-85  | 185. 062  |
| FBX028      | 1. 600819 | 2. 558672 | 31. 60929 | 4. 64E-100 | 1. 94E-98  | 216. 6563 |
| DEGS1       | 2. 103161 | 4. 073112 | 32. 47759 | 6. 47E-103 | 3. 19E-101 | 223. 2455 |
| CNIH4       | 2. 306962 | 4. 180006 | 34. 94789 | 8. 10E-111 | 6. 45E-109 | 241. 4795 |
| WDR26       | 1. 255539 | 4. 182172 | 20. 16964 | 8. 34E-59  | 7. 60E-58  | 121. 5226 |
| LBR         | 1. 272283 | 3. 631315 | 21. 16176 | 1. 31E-62  | 1. 32E-61  | 130. 2894 |
| ENAH        | 1. 300405 | 3. 827654 | 14. 71687 | 9. 81E-38  | 5. 67E-37  | 73. 01741 |
| SRP9        | 2. 018229 | 6. 179296 | 29. 13705 | 1. 05E-91  | 2. 92E-90  | 197. 3784 |
| PYCR2       | 1. 2585   | 5. 180882 | 20. 64461 | 1. 25E-60  | 1. 20E-59  | 125. 7274 |
| SDE2        | 1. 1554   | 2. 480593 | 20. 36225 | 1. 52E-59  | 1. 41E-58  | 123. 2293 |
| H3F3A       | 2. 397039 | 8. 018457 | 29. 38066 | 1. 53E-92  | 4. 38E-91  | 199. 312  |
| ACBD3       | 1. 844722 | 3. 801377 | 28. 84234 | 1. 10E-90  | 2. 89E-89  | 195. 0293 |
| LIN9        | 1. 092495 | 1. 050192 | 28. 3437  | 5. 95E-89  | 1. 43E-87  | 191. 0303 |
| ITPKB       | 1. 504136 | 2. 347659 | 26. 6602  | 5. 31E-83  | 1. 01E-81  | 177. 3044 |
| ADCK3       | -1. 34735 | 5. 306392 | -16. 7352 | 1. 66E-45  | 1. 12E-44  | 90. 8981  |
| CDC42BPA    | 1. 759011 | 3. 175486 | 28. 28246 | 9. 73E-89  | 2. 32E-87  | 190. 5371 |
| SNAP47      | 1. 296847 | 3. 577765 | 26. 63818 | 6. 37E-83  | 1. 21E-81  | 177. 1225 |
| JMJD4       | 1. 118509 | 3. 093824 | 21. 75967 | 6. 90E-65  | 7. 39E-64  | 135. 5401 |
| ARF1        | 1. 593574 | 7. 679331 | 20. 35928 | 1. 56E-59  | 1. 44E-58  | 123. 203  |
| MRPL55      | 1. 399457 | 5. 228349 | 20. 40987 | 9. 95E-60  | 9. 27E-59  | 123. 651  |
| GUK1        | 1. 901301 | 7. 509258 | 23. 01872 | 1. 21E-69  | 1. 49E-68  | 146. 5008 |
| GJC2        | 1. 767606 | 1. 106196 | 21. 15051 | 1. 44E-62  | 1. 45E-61  | 130. 1904 |
| TRIM11      | 1. 630505 | 3. 29061  | 27. 88817 | 2. 34E-87  | 5. 24E-86  | 187. 3503 |
| HIST3H2A    | 2. 373469 | 2. 439261 | 27. 84161 | 3. 41E-87  | 7. 59E-86  | 186. 9727 |
| RNF187      | 1. 509921 | 4. 918766 | 25. 78274 | 7. 68E-80  | 1. 31E-78  | 170. 0162 |
| RHOU        | 1. 164983 | 3. 002714 | 14. 84371 | 3. 22E-38  | 1. 87E-37  | 74. 13125 |
| ACTA1       | -1. 27988 | 0. 866527 | -14. 7115 | 1. 03E-37  | 5. 94E-37  | 72. 97062 |

|               |           |           |           |            |            |           |
|---------------|-----------|-----------|-----------|------------|------------|-----------|
| NUP133        | 1. 087232 | 3. 21222  | 21. 57909 | 3. 35E-64  | 3. 52E-63  | 133. 9572 |
| ABCBI0        | 1. 07672  | 2. 290017 | 21. 68895 | 1. 28E-64  | 1. 36E-63  | 134. 9205 |
| TAF5L         | 1. 582004 | 2. 717645 | 32. 2896  | 2. 66E-102 | 1. 27E-100 | 221. 8269 |
| COG2          | 1. 128391 | 3. 367803 | 21. 10617 | 2. 13E-62  | 2. 13E-61  | 129. 7999 |
| AGT           | 2. 22887  | 2. 897699 | 17. 68366 | 3. 47E-49  | 2. 53E-48  | 99. 36643 |
| CAPN9         | 2. 647529 | 1. 38388  | 19. 60862 | 1. 21E-56  | 1. 05E-55  | 116. 5404 |
| Clorf198      | 1. 761878 | 4. 003092 | 26. 3783  | 5. 45E-82  | 9. 99E-81  | 174. 9727 |
| ARV1          | 1. 084499 | 3. 45275  | 21. 42016 | 1. 35E-63  | 1. 40E-62  | 132. 5619 |
| GNPAT         | 1. 267603 | 4. 316266 | 21. 67456 | 1. 45E-64  | 1. 54E-63  | 134. 7944 |
| EXOC8         | 1. 013153 | 1. 934937 | 22. 95582 | 2. 09E-69  | 2. 54E-68  | 145. 9566 |
| SPRTN         | 1. 163866 | 1. 614014 | 27. 96395 | 1. 27E-87  | 2. 87E-86  | 187. 9643 |
| P11-295G20.   | 1. 692143 | 2. 362647 | 23. 64941 | 5. 32E-72  | 6. 97E-71  | 151. 9366 |
| TSNAX         | 1. 691712 | 3. 288927 | 31. 58086 | 5. 76E-100 | 2. 40E-98  | 216. 439  |
| DISC1         | 1. 010148 | 0. 83625  | 29. 25868 | 4. 01E-92  | 1. 13E-90  | 198. 3447 |
| SIPA1L2       | 1. 822807 | 2. 282548 | 22. 80018 | 8. 03E-69  | 9. 61E-68  | 144. 6084 |
| NTPCR         | 1. 949863 | 4. 497655 | 29. 6855  | 1. 38E-93  | 4. 16E-92  | 201. 7211 |
| PCNXL2        | 1. 368937 | 2. 54638  | 22. 60277 | 4. 44E-68  | 5. 20E-67  | 142. 8952 |
| KCNK1         | 3. 543376 | 3. 242848 | 40. 23331 | 1. 17E-126 | 2. 48E-124 | 278. 0399 |
| COA6          | 2. 200565 | 3. 991567 | 37. 83654 | 1. 19E-119 | 1. 63E-117 | 261. 8635 |
| IRF2BP2       | 1. 465321 | 5. 472115 | 21. 14075 | 1. 57E-62  | 1. 58E-61  | 130. 1044 |
| RP4-781K5. 2  | 1. 398425 | 4. 593728 | 18. 73819 | 2. 82E-53  | 2. 25E-52  | 108. 7848 |
| RP11-443B7. 1 | 1. 016564 | 0. 809197 | 23. 00799 | 1. 33E-69  | 1. 63E-68  | 146. 408  |
| TOMM20        | 1. 089886 | 5. 628754 | 16. 4879  | 1. 50E-44  | 9. 95E-44  | 88. 69404 |
| RBM34         | 1. 981332 | 4. 614456 | 32. 15929 | 7. 13E-102 | 3. 29E-100 | 220. 8409 |
| GGPS1         | 1. 996764 | 3. 688243 | 35. 67695 | 4. 35E-113 | 3. 96E-111 | 246. 7182 |
| B3GALNT2      | -1. 00703 | 3. 023109 | -15. 0112 | 7. 36E-39  | 4. 34E-38  | 75. 60453 |
| LYST          | 1. 138922 | 2. 272438 | 22. 36957 | 3. 37E-67  | 3. 85E-66  | 140. 8669 |
| NID1          | 1. 764641 | 3. 680088 | 16. 99552 | 1. 62E-46  | 1. 12E-45  | 93. 22062 |
| GPR137B       | 2. 759982 | 2. 515219 | 41. 34462 | 8. 15E-130 | 2. 28E-127 | 285. 323  |
| ERO1LB        | -2. 67824 | 4. 400781 | -21. 8184 | 4. 13E-65  | 4. 45E-64  | 136. 0544 |
| RPL35P1       | 1. 131342 | 1. 132003 | 19. 53568 | 2. 32E-56  | 2. 00E-55  | 115. 8915 |
| RYR2          | -1. 19335 | 1. 343379 | -20. 3944 | 1. 14E-59  | 1. 06E-58  | 123. 5141 |
| CHRM3         | -1. 22355 | 1. 621512 | -18. 4854 | 2. 69E-52  | 2. 10E-51  | 106. 5289 |
| FH            | 1. 264813 | 4. 503053 | 23. 1136  | 5. 34E-70  | 6. 63E-69  | 147. 3211 |
| KMO           | 1. 010921 | 0. 615569 | 20. 67362 | 9. 67E-61  | 9. 28E-60  | 125. 9837 |
| OPN3          | 2. 462532 | 2. 54618  | 36. 07216 | 2. 63E-114 | 2. 64E-112 | 249. 5312 |
| CHML          | 1. 129714 | 1. 294393 | 22. 89031 | 3. 68E-69  | 4. 46E-68  | 145. 3894 |
| EXO1          | 1. 46228  | 0. 80527  | 35. 15104 | 1. 88E-111 | 1. 54E-109 | 242. 9458 |
| CEP170        | 2. 329685 | 2. 687511 | 32. 33827 | 1. 85E-102 | 8. 88E-101 | 222. 1946 |
| SDCCAG8       | 1. 189072 | 3. 788964 | 21. 43894 | 1. 15E-63  | 1. 19E-62  | 132. 7269 |
| AKT3          | 1. 532336 | 2. 300768 | 19. 42863 | 6. 01E-56  | 5. 12E-55  | 114. 939  |
| ADSS          | 1. 907349 | 3. 899022 | 31. 17081 | 1. 33E-98  | 5. 16E-97  | 213. 2931 |
| DESI2         | 1. 938243 | 2. 992394 | 36. 22033 | 9. 22E-115 | 9. 40E-113 | 250. 581  |
| COX20         | 1. 621482 | 4. 468785 | 26. 31308 | 9. 34E-82  | 1. 70E-80  | 174. 432  |
| HNRNPU        | 1. 39876  | 6. 139866 | 19. 57364 | 1. 66E-56  | 1. 43E-55  | 116. 2293 |
| KIF26B        | 2. 41773  | 1. 327916 | 37. 39644 | 2. 48E-118 | 3. 13E-116 | 258. 8216 |
| SMYD3         | 2. 59953  | 3. 099159 | 45. 61995 | 1. 98E-141 | 1. 52E-138 | 312. 1285 |
| CNST          | 1. 049147 | 2. 217357 | 21. 86418 | 2. 76E-65  | 3. 00E-64  | 136. 4552 |
| SCCPDH        | 2. 332927 | 3. 999765 | 34. 59357 | 1. 05E-109 | 7. 81E-108 | 238. 9103 |
| AHCTF1        | 1. 420749 | 3. 152041 | 25. 39744 | 1. 93E-78  | 3. 15E-77  | 166. 7878 |
| NLRP3         | 1. 15625  | 0. 899616 | 20. 35333 | 1. 64E-59  | 1. 52E-58  | 123. 1503 |
| SH3BP5L       | 1. 068231 | 3. 168867 | 19. 1374  | 8. 04E-55  | 6. 67E-54  | 112. 345  |
| FAM150B       | -2. 45712 | 3. 49392  | -19. 2066 | 4. 34E-55  | 3. 62E-54  | 112. 9614 |
| SNTG2         | -1. 09376 | 1. 068028 | -16. 3238 | 6. 49E-44  | 4. 24E-43  | 87. 23242 |

|             |           |           |           |            |            |           |
|-------------|-----------|-----------|-----------|------------|------------|-----------|
| PXDN        | 2. 924201 | 2. 719338 | 30. 30417 | 1. 09E-95  | 3. 63E-94  | 206. 5747 |
| TSSC1       | 1. 938333 | 3. 229574 | 38. 47504 | 1. 52E-121 | 2. 38E-119 | 266. 2368 |
| TRAPPC12    | 1. 46627  | 4. 91581  | 23. 13635 | 4. 39E-70  | 5. 46E-69  | 147. 5175 |
| ADI1        | 1. 583593 | 4. 475876 | 26. 44606 | 3. 11E-82  | 5. 75E-81  | 175. 534  |
| RNASEH1     | 1. 159632 | 2. 667001 | 24. 70154 | 6. 79E-76  | 1. 02E-74  | 160. 9148 |
| RNASEH1-AS1 | 1. 154708 | 1. 758998 | 23. 60438 | 7. 83E-72  | 1. 02E-70  | 151. 5497 |
| CMPK2       | 1. 600044 | 2. 048887 | 18. 78079 | 1. 93E-53  | 1. 54E-52  | 109. 165  |
| RSAD2       | 2. 269435 | 1. 871092 | 25. 57445 | 4. 38E-79  | 7. 29E-78  | 168. 2731 |
| P11-439M11. | -1. 06698 | 0. 954187 | -18. 8183 | 1. 38E-53  | 1. 11E-52  | 109. 4995 |
| RNF144A-AS1 | -1. 62035 | 1. 830242 | -22. 6884 | 2. 11E-68  | 2. 50E-67  | 143. 639  |
| AC092580. 4 | 1. 675304 | 1. 121256 | 19. 38423 | 8. 92E-56  | 7. 55E-55  | 114. 5436 |
| ID2         | 1. 367848 | 5. 063429 | 16. 12181 | 3. 92E-43  | 2. 52E-42  | 85. 43592 |
| MBOAT2      | 3. 438154 | 2. 686823 | 39. 57695 | 9. 08E-125 | 1. 70E-122 | 273. 6745 |
| ASAP2       | 2. 341324 | 2. 68672  | 29. 03574 | 2. 35E-91  | 6. 40E-90  | 196. 5721 |
| ITGB1BP1    | 2. 422208 | 4. 732731 | 35. 19388 | 1. 38E-111 | 1. 15E-109 | 243. 2543 |
| CPSF3       | 1. 6865   | 3. 3888   | 32. 99796 | 1. 31E-104 | 7. 18E-103 | 227. 1492 |
| IAH1        | 1. 746384 | 4. 636779 | 28. 63488 | 5. 76E-90  | 1. 47E-88  | 193. 3693 |
| ADAM17      | 1. 763466 | 2. 298723 | 26. 96383 | 4. 37E-84  | 8. 64E-83  | 179. 8052 |
| YWHAQ       | 1. 059367 | 6. 467652 | 13. 80989 | 2. 70E-34  | 1. 45E-33  | 65. 11131 |
| TAF1B       | 1. 362031 | 1. 903653 | 26. 80075 | 1. 67E-83  | 3. 24E-82  | 178. 4634 |
| GRHL1       | 1. 27208  | 1. 579563 | 16. 31087 | 7. 28E-44  | 4. 75E-43  | 87. 11775 |
| RRM2        | 3. 187226 | 2. 044817 | 41. 14333 | 3. 01E-129 | 8. 05E-127 | 284. 0138 |
| HPCAL1      | 1. 332183 | 4. 915419 | 19. 89967 | 9. 14E-58  | 8. 12E-57  | 119. 127  |
| PQLC3       | 1. 127271 | 4. 029366 | 16. 5706  | 7. 19E-45  | 4. 79E-44  | 89. 43091 |
| ROCK2       | 1. 391257 | 2. 584556 | 24. 68849 | 7. 59E-76  | 1. 13E-74  | 160. 8041 |
| LPIN1       | 1. 010576 | 2. 998003 | 13. 74972 | 4. 55E-34  | 2. 44E-33  | 64. 59097 |
| TRIB2       | 1. 686869 | 3. 955254 | 15. 39437 | 2. 49E-40  | 1. 51E-39  | 78. 9856  |
| FAM49A      | 1. 468562 | 1. 541762 | 21. 84146 | 3. 37E-65  | 3. 65E-64  | 136. 2563 |
| VSNL1       | 1. 490561 | 1. 073606 | 22. 2442  | 1. 00E-66  | 1. 13E-65  | 139. 7745 |
| SMC6        | 1. 082313 | 2. 559434 | 13. 48661 | 4. 42E-33  | 2. 32E-32  | 62. 32251 |
| KCNS3       | 1. 237362 | 2. 668101 | 15. 28233 | 6. 71E-40  | 4. 04E-39  | 77. 99558 |
| RDH14       | 1. 165183 | 3. 704646 | 21. 16191 | 1. 31E-62  | 1. 32E-61  | 130. 2908 |
| MATN3       | 3. 717085 | 2. 051241 | 35. 56449 | 9. 70E-113 | 8. 59E-111 | 245. 9143 |
| LAPTM4A     | 1. 687679 | 7. 070829 | 22. 20288 | 1. 44E-66  | 1. 61E-65  | 139. 4142 |
| SDC1        | 4. 440089 | 4. 833034 | 45. 08234 | 5. 17E-140 | 3. 26E-137 | 308. 8597 |
| PUM2        | 1. 131657 | 4. 011685 | 19. 38026 | 9. 25E-56  | 7. 82E-55  | 114. 5083 |
| RHOB        | 1. 969956 | 6. 054383 | 17. 24656 | 1. 72E-47  | 1. 21E-46  | 95. 4619  |
| HS1BP3      | 1. 650672 | 3. 439941 | 28. 09586 | 4. 37E-88  | 1. 01E-86  | 189. 0313 |
| LDAH        | 1. 139287 | 2. 247679 | 23. 06132 | 8. 39E-70  | 1. 03E-68  | 146. 8692 |
| KLHL29      | 1. 021941 | 1. 463626 | 18. 86319 | 9. 26E-54  | 7. 47E-53  | 109. 9001 |
| UBXN2A      | 1. 327699 | 2. 146984 | 29. 55981 | 3. 71E-93  | 1. 10E-91  | 200. 7292 |
| FKBP1B      | 1. 681447 | 3. 120481 | 21. 68388 | 1. 34E-64  | 1. 42E-63  | 134. 8762 |
| SF3B6       | 2. 069328 | 5. 554128 | 31. 54841 | 7. 38E-100 | 3. 05E-98  | 216. 1908 |
| TP53I3      | 1. 311316 | 4. 853267 | 17. 27164 | 1. 38E-47  | 9. 72E-47  | 95. 68585 |
| PTRHD1      | 1. 412177 | 4. 045779 | 25. 98485 | 1. 43E-80  | 2. 49E-79  | 171. 7029 |
| CENPO       | 1. 351263 | 1. 497615 | 31. 83368 | 8. 40E-101 | 3. 66E-99  | 218. 3681 |
| ADCY3       | 1. 6473   | 3. 763139 | 21. 15724 | 1. 36E-62  | 1. 37E-61  | 130. 2497 |
| POMC        | -1. 74227 | 1. 896684 | -17. 6337 | 5. 43E-49  | 3. 94E-48  | 98. 91984 |
| ASXL2       | 1. 166071 | 1. 823836 | 21. 5924  | 2. 98E-64  | 3. 14E-63  | 134. 074  |
| KIF3C       | 1. 940551 | 1. 645681 | 28. 98691 | 3. 47E-91  | 9. 39E-90  | 196. 183  |
| RAB10       | 1. 9826   | 4. 757584 | 27. 64495 | 1. 68E-86  | 3. 65E-85  | 185. 375  |
| HADHA       | 1. 25077  | 5. 816845 | 18. 81087 | 1. 48E-53  | 1. 18E-52  | 109. 4333 |
| C2orf70     | 1. 365688 | 1. 19284  | 18. 25533 | 2. 10E-51  | 1. 61E-50  | 104. 4738 |
| KCNK3       | -1. 77208 | 2. 3799   | -18. 128  | 6. 55E-51  | 4. 95E-50  | 103. 3363 |

|          |           |           |           |            |            |           |
|----------|-----------|-----------|-----------|------------|------------|-----------|
| SLC35F6  | 1. 842431 | 3. 210065 | 36. 49719 | 1. 31E-115 | 1. 42E-113 | 252. 5356 |
| CENPA    | 1. 968425 | 1. 092491 | 35. 79293 | 1. 91E-113 | 1. 77E-111 | 247. 5456 |
| OST4     | 1. 987952 | 7. 432314 | 27. 20032 | 6. 30E-85  | 1. 28E-83  | 181. 7455 |
| EMILIN1  | 3. 195508 | 4. 402276 | 28. 4021  | 3. 72E-89  | 9. 06E-88  | 191. 5003 |
| CGREF1   | 2. 161752 | 1. 890221 | 29. 37835 | 1. 56E-92  | 4. 46E-91  | 199. 2937 |
| ATRAID   | 1. 528204 | 6. 21328  | 24. 2664  | 2. 73E-74  | 3. 88E-73  | 157. 2156 |
| CAD      | 1. 008579 | 3. 612749 | 16. 02892 | 8. 95E-43  | 5. 71E-42  | 84. 61036 |
| TRIM54   | 2. 121803 | 1. 312119 | 21. 36703 | 2. 15E-63  | 2. 22E-62  | 132. 0951 |
| SNX17    | 1. 495376 | 5. 369085 | 24. 69141 | 7. 40E-76  | 1. 11E-74  | 160. 8289 |
| PPM1G    | 1. 72673  | 5. 116378 | 27. 63523 | 1. 82E-86  | 3. 94E-85  | 185. 2959 |
| NRBP1    | 1. 389751 | 5. 349403 | 21. 7299  | 8. 95E-65  | 9. 56E-64  | 135. 2794 |
| KRTCAP3  | 1. 379342 | 5. 306247 | 15. 30807 | 5. 35E-40  | 3. 23E-39  | 78. 22298 |
| IFT172   | 2. 471454 | 4. 509503 | 27. 48887 | 5. 99E-86  | 1. 27E-84  | 184. 1037 |
| FNDC4    | 1. 594142 | 3. 167112 | 14. 04645 | 3. 46E-35  | 1. 89E-34  | 67. 16257 |
| ZNF512   | 1. 189511 | 3. 207652 | 19. 99284 | 4. 00E-58  | 3. 58E-57  | 119. 9542 |
| GPN1     | 1. 454221 | 3. 993391 | 26. 04991 | 8. 30E-81  | 1. 46E-79  | 172. 2448 |
| SLC4A1AP | 1. 2342   | 3. 215402 | 26. 51117 | 1. 82E-82  | 3. 39E-81  | 176. 0729 |
| MRPL33   | 1. 126895 | 6. 02208  | 16. 46502 | 1. 84E-44  | 1. 22E-43  | 88. 49021 |
| BRE      | 1. 638282 | 3. 961181 | 28. 90532 | 6. 65E-91  | 1. 77E-89  | 195. 5323 |
| FOSL2    | 2. 044175 | 4. 297287 | 20. 40437 | 1. 04E-59  | 9. 73E-59  | 123. 6023 |
| PLB1     | 1. 549434 | 1. 285758 | 32. 01231 | 2. 17E-101 | 9. 77E-100 | 219. 7264 |
| PPP1CB   | 2. 254654 | 5. 107396 | 30. 17383 | 3. 00E-95  | 9. 85E-94  | 205. 5561 |
| TRMT61B  | 1. 395535 | 2. 505221 | 30. 67103 | 6. 29E-97  | 2. 24E-95  | 209. 4302 |
| WDR43    | 1. 153954 | 3. 209707 | 19. 796   | 2. 30E-57  | 2. 02E-56  | 118. 2061 |
| CLIP4    | 1. 418454 | 2. 638006 | 18. 92685 | 5. 25E-54  | 4. 26E-53  | 110. 4679 |
| YPEL5    | 1. 849664 | 4. 88156  | 29. 38956 | 1. 42E-92  | 4. 09E-91  | 199. 3825 |
| LBH      | 3. 490298 | 3. 993505 | 38. 31112 | 4. 63E-121 | 6. 98E-119 | 265. 1185 |
| LCLAT1   | 1. 424343 | 1. 955172 | 32. 74051 | 9. 00E-104 | 4. 68E-102 | 225. 2221 |
| GALNT14  | 2. 128311 | 2. 080346 | 20. 02356 | 3. 05E-58  | 2. 74E-57  | 120. 2268 |
| EHD3     | 1. 769683 | 1. 436165 | 30. 47832 | 2. 80E-96  | 9. 67E-95  | 207. 9324 |
| XDH      | 2. 204375 | 1. 261882 | 27. 36744 | 1. 61E-85  | 3. 35E-84  | 183. 1125 |
| MEMO1    | 1. 004653 | 3. 664549 | 18. 26921 | 1. 86E-51  | 1. 42E-50  | 104. 5978 |
| DPY30    | 1. 904582 | 5. 082722 | 31. 22108 | 9. 05E-99  | 3. 54E-97  | 213. 6798 |
| SPAST    | 1. 236636 | 1. 892881 | 29. 05272 | 2. 06E-91  | 5. 62E-90  | 196. 7074 |
| SLC30A6  | 1. 078925 | 2. 53233  | 23. 76973 | 1. 90E-72  | 2. 53E-71  | 152. 969  |
| YIPF4    | 1. 399542 | 4. 261463 | 24. 2183  | 4. 11E-74  | 5. 81E-73  | 156. 8055 |
| LTBP1    | 3. 688207 | 3. 056496 | 38. 33717 | 3. 87E-121 | 5. 89E-119 | 265. 2964 |
| RASGRP3  | 1. 132537 | 2. 050018 | 14. 91592 | 1. 70E-38  | 9. 98E-38  | 74. 76614 |
| FAM98A   | 1. 314831 | 3. 505654 | 22. 83718 | 5. 83E-69  | 7. 01E-68  | 144. 9292 |
| CRIM1    | 2. 087286 | 3. 254919 | 27. 31817 | 2. 41E-85  | 4. 98E-84  | 182. 7098 |
| FEZ2     | 2. 265126 | 3. 611858 | 36. 75424 | 2. 16E-116 | 2. 44E-114 | 254. 3422 |
| STRN     | 1. 27158  | 1. 923534 | 25. 41243 | 1. 70E-78  | 2. 78E-77  | 166. 9137 |
| GPATCH11 | 1. 016392 | 1. 472652 | 24. 45638 | 5. 43E-75  | 7. 90E-74  | 158. 8331 |
| EIF2AK2  | 1. 752772 | 2. 523687 | 27. 41263 | 1. 11E-85  | 2. 34E-84  | 183. 4815 |
| CEBPZOS  | 1. 377886 | 3. 750864 | 26. 04365 | 8. 74E-81  | 1. 53E-79  | 172. 1927 |
| CEBPZ    | 1. 398713 | 4. 168593 | 24. 39175 | 9. 40E-75  | 1. 36E-73  | 158. 2833 |
| PRKD3    | 1. 241131 | 2. 457463 | 18. 71404 | 3. 50E-53  | 2. 78E-52  | 108. 5693 |
| QPCT     | 2. 988402 | 2. 950888 | 28. 63907 | 5. 57E-90  | 1. 42E-88  | 193. 4029 |
| CDC42EP3 | 2. 242779 | 2. 97226  | 28. 41466 | 3. 36E-89  | 8. 21E-88  | 191. 6013 |
| RMDN2    | 1. 145987 | 1. 932018 | 22. 72561 | 1. 53E-68  | 1. 82E-67  | 143. 9617 |
| CYP1B1   | 2. 658443 | 2. 295927 | 23. 10313 | 5. 85E-70  | 7. 24E-69  | 147. 2306 |
| ATL2     | 1. 129196 | 3. 655945 | 16. 82996 | 7. 11E-46  | 4. 85E-45  | 91. 74342 |
| RPLPOP6  | 1. 128621 | 3. 940014 | 16. 82513 | 7. 43E-46  | 5. 06E-45  | 91. 70033 |
| HNRNPLL  | 1. 399276 | 3. 36138  | 25. 0399  | 3. 90E-77  | 6. 07E-76  | 163. 777  |



|             |           |           |           |            |            |           |
|-------------|-----------|-----------|-----------|------------|------------|-----------|
| GALM        | 1. 699378 | 3. 11814  | 28. 95055 | 4. 64E-91  | 1. 24E-89  | 195. 8932 |
| SRSF7       | 1. 15817  | 5. 786883 | 15. 99097 | 1. 25E-42  | 7. 98E-42  | 84. 27321 |
| GEMIN6      | 1. 615436 | 2. 581288 | 32. 1954  | 5. 42E-102 | 2. 53E-100 | 221. 1144 |
| MORN2       | 1. 33024  | 3. 644044 | 23. 98159 | 3. 10E-73  | 4. 24E-72  | 154. 7836 |
| SLC8A1      | 1. 067543 | 0. 755718 | 16. 34757 | 5. 25E-44  | 3. 43E-43  | 87. 44443 |
| PKDCC       | 2. 02752  | 4. 885055 | 19. 10002 | 1. 12E-54  | 9. 27E-54  | 112. 0119 |
| EML4        | 1. 008466 | 4. 010969 | 17. 09306 | 6. 79E-47  | 4. 73E-46  | 94. 0913  |
| COX7A2L     | 1. 575975 | 5. 737903 | 24. 2578  | 2. 94E-74  | 4. 17E-73  | 157. 1423 |
| AC016735. 2 | 2. 092061 | 1. 121567 | 14. 75439 | 7. 06E-38  | 4. 09E-37  | 73. 34674 |
| ZFP36L2     | 1. 894221 | 5. 739938 | 22. 68185 | 2. 24E-68  | 2. 65E-67  | 143. 582  |
| THADA       | 1. 369658 | 3. 457623 | 25. 41685 | 1. 64E-78  | 2. 68E-77  | 166. 9508 |
| DYNC2LI1    | 1. 165831 | 3. 487971 | 20. 2523  | 4. 01E-59  | 3. 68E-58  | 122. 2553 |
| LRPPRC      | 1. 100948 | 4. 384779 | 18. 22261 | 2. 82E-51  | 2. 15E-50  | 104. 1815 |
| PPM1B       | 1. 128332 | 3. 785796 | 18. 80408 | 1. 57E-53  | 1. 26E-52  | 109. 3728 |
| RHOQ        | 1. 039933 | 4. 171457 | 14. 03808 | 3. 72E-35  | 2. 03E-34  | 67. 08979 |
| CRIP1       | 1. 596991 | 2. 428825 | 35. 21753 | 1. 16E-111 | 9. 75E-110 | 243. 4246 |
| SOCS5       | 1. 521739 | 2. 320114 | 25. 30394 | 4. 23E-78  | 6. 82E-77  | 166. 0018 |
| CALM2       | 2. 805656 | 7. 619059 | 32. 99728 | 1. 32E-104 | 7. 21E-103 | 227. 1441 |
| EPCAM       | 2. 552738 | 6. 927961 | 28. 8512  | 1. 02E-90  | 2. 70E-89  | 195. 1001 |
| MSH2        | 1. 343089 | 2. 426409 | 24. 16001 | 6. 76E-74  | 9. 48E-73  | 156. 3081 |
| FOXN2       | 1. 216536 | 1. 902487 | 21. 96283 | 1. 17E-65  | 1. 28E-64  | 137. 318  |
| PPP1R21     | 1. 345666 | 3. 352212 | 23. 63774 | 5. 88E-72  | 7. 69E-71  | 151. 8363 |
| STON1       | 1. 29606  | 1. 571467 | 18. 1165  | 7. 26E-51  | 5. 48E-50  | 103. 2336 |
| PSME4       | 1. 535056 | 4. 131514 | 26. 73273 | 2. 92E-83  | 5. 61E-82  | 177. 9027 |
| SPTBN1      | 1. 822473 | 5. 6533   | 26. 94766 | 4. 99E-84  | 9. 86E-83  | 179. 6723 |
| RTN4        | 2. 291711 | 6. 156624 | 29. 04865 | 2. 13E-91  | 5. 80E-90  | 196. 6749 |
| CFAP36      | 1. 443405 | 4. 520696 | 24. 25982 | 2. 89E-74  | 4. 10E-73  | 157. 1595 |
| SMEK2       | 1. 249524 | 3. 976803 | 21. 82676 | 3. 83E-65  | 4. 14E-64  | 136. 1276 |
| EFEMP1      | 2. 021356 | 4. 527092 | 16. 4031  | 3. 20E-44  | 2. 10E-43  | 87. 9388  |
| MIR217HG    | -2. 43749 | 1. 572751 | -27. 9394 | 1. 55E-87  | 3. 48E-86  | 187. 7657 |
| VRK2        | 1. 137473 | 3. 04608  | 19. 43596 | 5. 63E-56  | 4. 80E-55  | 115. 0042 |
| PEX13       | 1. 486056 | 2. 74985  | 27. 33368 | 2. 12E-85  | 4. 40E-84  | 182. 8366 |
| AC016747. 3 | 1. 300794 | 1. 815265 | 22. 34018 | 4. 35E-67  | 4. 96E-66  | 140. 611  |
| C2orf74     | 1. 338421 | 3. 680764 | 17. 90451 | 4. 83E-50  | 3. 58E-49  | 101. 3397 |
| USP34       | 1. 085171 | 4. 492605 | 17. 90583 | 4. 77E-50  | 3. 54E-49  | 101. 3515 |
| XP01        | 1. 018383 | 4. 968984 | 13. 26567 | 2. 95E-32  | 1. 53E-31  | 60. 42677 |
| COMMD1      | 1. 783787 | 4. 386697 | 34. 08557 | 4. 26E-108 | 2. 85E-106 | 235. 1999 |
| B3GNT2      | 1. 255445 | 3. 469942 | 19. 17685 | 5. 66E-55  | 4. 71E-54  | 112. 6965 |
| EHBP1       | 1. 903857 | 3. 609885 | 26. 24485 | 1. 64E-81  | 2. 96E-80  | 173. 8657 |
| MDH1        | 1. 709461 | 5. 751463 | 27. 70332 | 1. 05E-86  | 2. 29E-85  | 185. 8498 |
| UGP2        | 1. 476809 | 5. 264205 | 23. 11898 | 5. 10E-70  | 6. 34E-69  | 147. 3675 |
| PELI1       | 2. 031515 | 3. 095088 | 27. 86746 | 2. 77E-87  | 6. 19E-86  | 187. 1824 |
| LGALS1      | 1. 403119 | 2. 269587 | 27. 21656 | 5. 52E-85  | 1. 12E-83  | 181. 8784 |
| AFTPH       | 1. 464662 | 4. 147656 | 28. 19722 | 1. 93E-88  | 4. 53E-87  | 189. 8498 |
| SERTAD2     | 1. 636751 | 2. 404682 | 25. 50235 | 8. 00E-79  | 1. 32E-77  | 167. 6684 |
| RAB1A       | 1. 291866 | 6. 219868 | 18. 51855 | 2. 00E-52  | 1. 57E-51  | 106. 8244 |
| AC007318. 5 | 1. 499113 | 2. 490037 | 25. 21625 | 8. 83E-78  | 1. 41E-76  | 165. 2638 |
| ACTR2       | 2. 753701 | 4. 937196 | 38. 07456 | 2. 33E-120 | 3. 31E-118 | 263. 4992 |
| SPRED2      | 1. 344136 | 3. 19478  | 21. 1885  | 1. 03E-62  | 1. 05E-61  | 130. 5249 |
| AC078941. 1 | -3. 19041 | 2. 939056 | -29. 6338 | 2. 07E-93  | 6. 21E-92  | 201. 3133 |
| C1D         | 1. 6431   | 3. 645232 | 29. 54468 | 4. 19E-93  | 1. 23E-91  | 200. 6097 |
| PN01        | 1. 437839 | 2. 817801 | 27. 6076  | 2. 28E-86  | 4. 91E-85  | 185. 0711 |
| PPP3R1      | 1. 730039 | 3. 856458 | 30. 94814 | 7. 39E-98  | 2. 76E-96  | 211. 5759 |
| CNRIP1      | 1. 79242  | 2. 270334 | 23. 13947 | 4. 27E-70  | 5. 32E-69  | 147. 5445 |

|              |          |          |          |           |           |          |
|--------------|----------|----------|----------|-----------|-----------|----------|
| PLEK         | 2.12806  | 1.751064 | 23.0703  | 7.77E-70  | 9.59E-69  | 146.9468 |
| ARHGAP25     | 2.016349 | 1.870274 | 27.01079 | 2.98E-84  | 5.92E-83  | 180.191  |
| ANTXR1       | 4.441169 | 3.454944 | 39.75924 | 2.70E-125 | 5.28E-123 | 274.8917 |
| GFPT1        | 1.213955 | 3.694337 | 17.41899 | 3.70E-48  | 2.64E-47  | 97.00187 |
| NFU1         | 1.336375 | 4.655062 | 22.67059 | 2.47E-68  | 2.91E-67  | 143.4842 |
| ANXA4        | 1.614223 | 7.700836 | 14.71856 | 9.67E-38  | 5.59E-37  | 73.03223 |
| GMCL1        | 1.051074 | 2.598529 | 19.56238 | 1.83E-56  | 1.58E-55  | 116.1291 |
| SNRNP27      | 1.808595 | 4.032382 | 29.60275 | 2.65E-93  | 7.89E-92  | 201.0683 |
| MXD1         | 2.276229 | 2.512213 | 26.64342 | 6.10E-83  | 1.16E-81  | 177.1658 |
| PCBP1        | 1.339617 | 7.099357 | 15.74801 | 1.08E-41  | 6.77E-41  | 82.1168  |
| PCYOX1       | 1.545895 | 3.304241 | 24.04725 | 1.77E-73  | 2.44E-72  | 155.345  |
| SNRPG        | 2.207092 | 5.582225 | 32.53682 | 4.14E-103 | 2.07E-101 | 223.6915 |
| TGFA         | 2.23356  | 2.624376 | 30.06573 | 6.99E-95  | 2.25E-93  | 204.7098 |
| CD207        | 1.369655 | 0.7156   | 18.83769 | 1.16E-53  | 9.36E-53  | 109.6726 |
| ANKRD53      | -1.69561 | 1.62961  | -33.8498 | 2.40E-107 | 1.53E-105 | 233.4668 |
| NAGK         | 1.321556 | 5.542902 | 20.28829 | 2.92E-59  | 2.69E-58  | 122.5741 |
| MPHOSPH10    | 1.071938 | 3.58422  | 20.75561 | 4.69E-61  | 4.54E-60  | 126.7081 |
| PAIP2B       | -2.64432 | 2.614346 | -34.8955 | 1.18E-110 | 9.25E-109 | 241.1009 |
| ZNF638       | 1.072807 | 5.24533  | 15.56735 | 5.39E-41  | 3.31E-40  | 80.51598 |
| DYSF         | 1.808633 | 1.892573 | 27.26469 | 3.73E-85  | 7.63E-84  | 182.2724 |
| EXOC6B       | 1.206501 | 2.074869 | 23.44119 | 3.18E-71  | 4.08E-70  | 150.1462 |
| RAB11FIP5    | 1.2985   | 3.802338 | 21.10936 | 2.08E-62  | 2.08E-61  | 129.828  |
| CCT7         | 1.633702 | 6.196642 | 24.27651 | 2.51E-74  | 3.56E-73  | 157.3018 |
| TPRKB        | 1.053454 | 4.288759 | 18.75686 | 2.39E-53  | 1.91E-52  | 108.9514 |
| DUSP11       | 1.6928   | 3.200469 | 32.45212 | 7.83E-103 | 3.84E-101 | 223.0535 |
| STAMPB       | 1.88209  | 3.985653 | 32.26397 | 3.23E-102 | 1.53E-100 | 221.6331 |
| ACTG2        | 2.876651 | 3.030746 | 17.72673 | 2.36E-49  | 1.73E-48  | 99.7512  |
| DGUOK        | 2.303201 | 4.931256 | 36.10189 | 2.13E-114 | 2.15E-112 | 249.7421 |
| BOLA3        | 1.164281 | 4.313566 | 20.6545  | 1.14E-60  | 1.10E-59  | 125.8148 |
| MOB1A        | 2.382349 | 3.849525 | 38.71389 | 3.00E-122 | 4.87E-120 | 267.8606 |
| DCTN1        | 1.807055 | 5.206811 | 27.55942 | 3.37E-86  | 7.21E-85  | 184.6787 |
| C2orf81      | 1.506992 | 1.591488 | 30.77687 | 2.77E-97  | 1.01E-95  | 210.2509 |
| WDR54        | 2.094519 | 3.075916 | 32.60615 | 2.46E-103 | 1.25E-101 | 224.213  |
| MRPL53       | 1.105625 | 5.399487 | 15.23991 | 9.77E-40  | 5.86E-39  | 77.62107 |
| LBX2         | 1.075059 | 1.05124  | 19.11013 | 1.02E-54  | 8.48E-54  | 112.102  |
| LBX2-AS1     | 1.668956 | 2.25576  | 30.75783 | 3.21E-97  | 1.16E-95  | 210.1033 |
| PCGF1        | 1.066679 | 3.819427 | 17.80289 | 1.20E-49  | 8.82E-49  | 100.4317 |
| DQX1         | 1.529654 | 0.822805 | 16.0291  | 8.93E-43  | 5.70E-42  | 84.61197 |
| HTRA2        | 1.556549 | 4.01434  | 26.91095 | 6.75E-84  | 1.33E-82  | 179.3705 |
| LOXL3        | 1.621078 | 1.629694 | 25.90959 | 2.67E-80  | 4.60E-79  | 171.0753 |
| DOK1         | 1.878196 | 3.051584 | 34.24542 | 1.33E-108 | 9.20E-107 | 236.3709 |
| P11-259N19.  | 1.223676 | 0.775467 | 34.18268 | 2.10E-108 | 1.43E-106 | 235.9117 |
| HK2          | 3.545554 | 2.574631 | 40.06651 | 3.51E-126 | 7.25E-124 | 276.9351 |
| POLE4        | 1.989404 | 4.819243 | 32.55025 | 3.75E-103 | 1.87E-101 | 223.7926 |
| MRPL19       | 1.393189 | 3.366677 | 25.60315 | 3.44E-79  | 5.76E-78  | 168.5135 |
| RP11-342K6.1 | 1.049385 | 1.94573  | 26.02235 | 1.04E-80  | 1.83E-79  | 172.0153 |
| REG3G        | -5.01289 | 6.405843 | -14.6785 | 1.38E-37  | 7.92E-37  | 72.68043 |
| REG1B        | -7.51543 | 9.199084 | -18.9874 | 3.06E-54  | 2.50E-53  | 111.0075 |
| REG1A        | -6.08948 | 11.88039 | -18.1382 | 5.99E-51  | 4.52E-50  | 103.4272 |
| REG1P        | -5.40168 | 4.47476  | -19.1446 | 7.54E-55  | 6.26E-54  | 112.409  |
| REG3A        | -2.97499 | 8.134695 | -6.8503  | 3.83E-11  | 1.22E-10  | 12.15683 |
| TRABD2A      | 2.12516  | 1.254515 | 29.34295 | 2.06E-92  | 5.86E-91  | 199.0132 |
| TMSB10       | 4.177044 | 9.960132 | 39.36625 | 3.71E-124 | 6.61E-122 | 272.2629 |
| TGOLN2       | 1.912383 | 4.934973 | 26.60875 | 8.12E-83  | 1.53E-81  | 176.8795 |

|              |           |           |           |            |            |           |
|--------------|-----------|-----------|-----------|------------|------------|-----------|
| RETSAT       | 1. 327575 | 4. 738433 | 17. 45033 | 2. 79E-48  | 2. 00E-47  | 97. 28182 |
| CAPG         | 4. 626835 | 6. 183574 | 51. 48375 | 4. 10E-156 | 8. 85E-153 | 346. 0263 |
| MAT2A        | -1. 04391 | 7. 28812  | -9. 50346 | 5. 19E-19  | 2. 02E-18  | 30. 06893 |
| VAMP8        | 1. 884847 | 6. 909729 | 25. 05739 | 3. 36E-77  | 5. 25E-76  | 163. 9246 |
| VAMP5        | 2. 188299 | 4. 66169  | 28. 9779  | 3. 73E-91  | 1. 01E-89  | 196. 1112 |
| RNF181       | 1. 268955 | 6. 629129 | 18. 09609 | 8. 72E-51  | 6. 56E-50  | 103. 0513 |
| USP39        | 1. 560503 | 4. 101384 | 30. 65853 | 6. 93E-97  | 2. 46E-95  | 209. 3332 |
| GNLY         | 1. 918907 | 1. 506815 | 22. 88378 | 3. 89E-69  | 4. 71E-68  | 145. 3329 |
| ST3GAL5      | 1. 258406 | 2. 609934 | 18. 10244 | 8. 24E-51  | 6. 20E-50  | 103. 108  |
| IMMT         | 1. 112826 | 4. 680397 | 20. 50665 | 4. 23E-60  | 3. 98E-59  | 124. 5074 |
| MRPL35       | 1. 498335 | 3. 665774 | 28. 50252 | 1. 66E-89  | 4. 11E-88  | 192. 3074 |
| CHMP3        | 1. 236899 | 5. 576167 | 18. 66819 | 5. 27E-53  | 4. 18E-52  | 108. 1602 |
| RNF103       | 1. 029284 | 4. 192828 | 14. 60002 | 2. 74E-37  | 1. 57E-36  | 71. 99296 |
| RMND5A       | 1. 348145 | 2. 919104 | 23. 13126 | 4. 59E-70  | 5. 70E-69  | 147. 4736 |
| CD8A         | 1. 683409 | 1. 632638 | 17. 63458 | 5. 38E-49  | 3. 91E-48  | 98. 9279  |
| CD8B         | 1. 420067 | 1. 138746 | 18. 52166 | 1. 95E-52  | 1. 52E-51  | 106. 8522 |
| IGKV3OR2-268 | 1. 105878 | 0. 560578 | 13. 98159 | 6. 08E-35  | 3. 31E-34  | 66. 59931 |
| AC133644. 2  | 1. 986048 | 1. 268197 | 33. 69103 | 7. 73E-107 | 4. 82E-105 | 232. 2964 |
| LINC00152    | 3. 600165 | 4. 249161 | 40. 33253 | 6. 06E-127 | 1. 31E-124 | 278. 6957 |
| P11-1399P15. | 1. 133668 | 0. 603985 | 19. 88065 | 1. 08E-57  | 9. 60E-57  | 118. 9581 |
| KRCC1        | 1. 39941  | 3. 895755 | 22. 35496 | 3. 83E-67  | 4. 37E-66  | 140. 7397 |
| FABP1        | 1. 202681 | 1. 104029 | 7. 229317 | 3. 65E-12  | 1. 20E-11  | 14. 47166 |
| RPIA         | 1. 165889 | 3. 428759 | 23. 80041 | 1. 46E-72  | 1. 96E-71  | 153. 2321 |
| IGKC         | 6. 413591 | 7. 881131 | 29. 09156 | 1. 51E-91  | 4. 15E-90  | 197. 0165 |
| IGKV1-8      | 3. 272888 | 1. 915316 | 20. 78634 | 3. 57E-61  | 3. 47E-60  | 126. 9794 |
| IGKV3-11     | 5. 772051 | 4. 551684 | 29. 42109 | 1. 11E-92  | 3. 20E-91  | 199. 6322 |
| IGKV4-1      | 4. 760704 | 3. 263966 | 26. 42447 | 3. 72E-82  | 6. 86E-81  | 175. 3552 |
| IGKV1-5      | 4. 780186 | 3. 173543 | 26. 21342 | 2. 13E-81  | 3. 83E-80  | 173. 6046 |
| IGKV1-6      | 2. 932945 | 1. 736215 | 19. 88002 | 1. 09E-57  | 9. 65E-57  | 118. 9525 |
| IGKV1-9      | 3. 84173  | 2. 374837 | 23. 37237 | 5. 75E-71  | 7. 32E-70  | 149. 5536 |
| IGKV1-12     | 1. 714769 | 0. 878275 | 14. 21824 | 7. 73E-36  | 4. 28E-35  | 68. 65722 |
| IGKV3-15     | 4. 914545 | 3. 194116 | 26. 26593 | 1. 38E-81  | 2. 49E-80  | 174. 0407 |
| IGKV1-16     | 3. 577628 | 2. 203701 | 21. 77718 | 5. 92E-65  | 6. 35E-64  | 135. 6935 |
| IGKV1-17     | 3. 89659  | 2. 427815 | 22. 70602 | 1. 81E-68  | 2. 15E-67  | 143. 7918 |
| IGKV3-20     | 5. 676544 | 4. 324234 | 28. 09887 | 4. 27E-88  | 9. 86E-87  | 189. 0556 |
| IGKV6-21     | 2. 092792 | 1. 164473 | 14. 52585 | 5. 25E-37  | 2. 98E-36  | 71. 34344 |
| IGKV2-24     | 3. 099451 | 2. 053557 | 19. 87432 | 1. 15E-57  | 1. 01E-56  | 118. 9019 |
| IGKV1-27     | 3. 670539 | 2. 287697 | 20. 31614 | 2. 28E-59  | 2. 10E-58  | 122. 8209 |
| IGKV2-28     | 4. 821392 | 3. 560331 | 24. 50158 | 3. 70E-75  | 5. 41E-74  | 159. 2174 |
| IGKV2-30     | 2. 668363 | 1. 754726 | 17. 0124  | 1. 40E-46  | 9. 65E-46  | 93. 37132 |
| IGKV1-33     | 4. 712863 | 3. 05733  | 24. 56214 | 2. 21E-75  | 3. 26E-74  | 159. 7319 |
| IGKV1-39     | 1. 910391 | 0. 957616 | 15. 39138 | 2. 56E-40  | 1. 55E-39  | 78. 95916 |
| IGKV2D-40    | 1. 373222 | 0. 713481 | 11. 44251 | 1. 29E-25  | 5. 82E-25  | 45. 18568 |
| IGKV1D-39    | 5. 33574  | 3. 893396 | 26. 96856 | 4. 21E-84  | 8. 33E-83  | 179. 8441 |
| IGKV1D-33    | 1. 538705 | 0. 746662 | 14. 54766 | 4. 33E-37  | 2. 47E-36  | 71. 53432 |
| IGKV2D-30    | 1. 030909 | 0. 529456 | 11. 95458 | 1. 91E-27  | 8. 94E-27  | 49. 3839  |
| IGKV2D-29    | 2. 552893 | 1. 460578 | 17. 11323 | 5. 67E-47  | 3. 95E-46  | 94. 27134 |
| IGKV2D-28    | 3. 761992 | 2. 029563 | 20. 54018 | 3. 14E-60  | 2. 97E-59  | 124. 804  |
| IGKV6D-21    | 1. 242807 | 0. 696301 | 11. 41435 | 1. 63E-25  | 7. 30E-25  | 44. 957   |
| IGKV3D-20    | 2. 202195 | 1. 186766 | 16. 71108 | 2. 05E-45  | 1. 39E-44  | 90. 68318 |
| IGKV1D-16    | 1. 585096 | 0. 875546 | 14. 60962 | 2. 52E-37  | 1. 44E-36  | 72. 077   |
| IGKV3D-15    | 1. 769343 | 0. 88822  | 14. 90135 | 1. 94E-38  | 1. 13E-37  | 74. 63794 |
| IGKV3D-11    | 1. 387825 | 0. 708563 | 14. 87377 | 2. 47E-38  | 1. 44E-37  | 74. 39548 |
| IGKV1D-13    | 2. 037525 | 1. 178285 | 11. 96196 | 1. 80E-27  | 8. 42E-27  | 49. 44486 |

|              |          |          |          |           |           |          |
|--------------|----------|----------|----------|-----------|-----------|----------|
| AC027612.6   | 1.93071  | 3.208072 | 25.53943 | 5.87E-79  | 9.72E-78  | 167.9795 |
| MRPS5        | 1.096677 | 4.668156 | 17.57076 | 9.52E-49  | 6.88E-48  | 98.35776 |
| PROM2        | 2.117343 | 3.759196 | 18.29456 | 1.48E-51  | 1.14E-50  | 104.8241 |
| P11-440D17.  | 1.310741 | 1.988855 | 22.56086 | 6.39E-68  | 7.45E-67  | 142.5311 |
| LINC00342    | 1.208803 | 3.530171 | 9.733902 | 9.16E-20  | 3.64E-19  | 31.79042 |
| ANKRD36C     | 1.147272 | 1.661245 | 13.40916 | 8.61E-33  | 4.50E-32  | 61.65694 |
| DUSP2        | 1.947287 | 1.819066 | 20.68434 | 8.79E-61  | 8.45E-60  | 126.0785 |
| STARD7       | 1.042526 | 4.800435 | 18.06704 | 1.13E-50  | 8.49E-50  | 102.7918 |
| TMEM127      | 1.622127 | 4.283775 | 25.24792 | 6.77E-78  | 1.08E-76  | 165.5304 |
| SNRNP200     | 1.036137 | 5.503148 | 15.84732 | 4.49E-42  | 2.82E-41  | 82.99776 |
| NCAPH        | 2.217876 | 1.24627  | 41.74231 | 6.25E-131 | 1.91E-128 | 287.8968 |
| ARID5A       | 1.88096  | 3.242357 | 23.11641 | 5.22E-70  | 6.48E-69  | 147.3453 |
| LMAN2L       | 1.259675 | 3.195264 | 22.38577 | 2.93E-67  | 3.35E-66  | 141.008  |
| CNNM4        | 1.505116 | 2.593055 | 23.19048 | 2.75E-70  | 3.45E-69  | 147.985  |
| ANKRD39      | 1.339877 | 2.854785 | 29.17954 | 7.52E-92  | 2.09E-90  | 197.7162 |
| SEMA4C       | 1.687725 | 3.371697 | 23.42653 | 3.61E-71  | 4.62E-70  | 150.02   |
| COX5B        | 1.51936  | 6.682507 | 20.68259 | 8.93E-61  | 8.58E-60  | 126.0631 |
| LINC01125    | -1.3886  | 2.364413 | -19.8808 | 1.08E-57  | 9.59E-57  | 118.9592 |
| ZAP70        | 1.265395 | 1.401709 | 13.67119 | 8.97E-34  | 4.78E-33  | 63.91274 |
| HMGNI1P36    | 1.247596 | 0.644819 | 25.74994 | 1.01E-79  | 1.71E-78  | 169.742  |
| COA5         | 1.016701 | 4.134361 | 17.76928 | 1.62E-49  | 1.19E-48  | 100.1314 |
| UNC50        | 1.033204 | 4.5809   | 18.35362 | 8.74E-52  | 6.75E-51  | 105.3516 |
| KIAA1211L    | 1.217182 | 2.161008 | 20.89329 | 1.39E-61  | 1.36E-60  | 127.9233 |
| C2orf15      | 1.097601 | 1.296656 | 25.066   | 3.13E-77  | 4.89E-76  | 163.9973 |
| MITD1        | 1.477312 | 3.95124  | 23.84787 | 9.72E-73  | 1.31E-71  | 153.6389 |
| MRPL30       | 1.4925   | 3.281221 | 31.97334 | 2.91E-101 | 1.30E-99  | 219.4304 |
| TXNDC9       | 1.986014 | 3.351938 | 36.58548 | 7.05E-116 | 7.76E-114 | 253.157  |
| PDCL3        | 2.068766 | 3.28906  | 40.49741 | 2.05E-127 | 4.66E-125 | 279.783  |
| RPL31        | 1.079028 | 10.81176 | 10.52767 | 1.99E-22  | 8.34E-22  | 37.88415 |
| CNOT11       | 1.121055 | 4.25282  | 18.77463 | 2.04E-53  | 1.63E-52  | 109.11   |
| RNF149       | 1.536941 | 4.863559 | 24.24935 | 3.16E-74  | 4.48E-73  | 157.0703 |
| CREG2        | 1.873187 | 0.9534   | 25.20099 | 1.00E-77  | 1.60E-76  | 165.1353 |
| MAP4K4       | 2.875311 | 3.923121 | 39.96803 | 6.74E-126 | 1.37E-123 | 276.2813 |
| IL1R2        | 2.996029 | 2.391291 | 22.31556 | 5.39E-67  | 6.12E-66  | 140.3965 |
| IL1R1        | 1.780658 | 4.288468 | 18.25244 | 2.16E-51  | 1.65E-50  | 104.448  |
| IL18R1       | 1.003044 | 1.180977 | 16.37899 | 3.97E-44  | 2.60E-43  | 87.72407 |
| SLC9A4       | 1.193554 | 0.596748 | 12.09732 | 5.83E-28  | 2.76E-27  | 50.5667  |
| SLC9A2       | 1.362391 | 0.674959 | 17.8979  | 5.12E-50  | 3.80E-49  | 101.2806 |
| TMEM182      | 1.101022 | 1.317124 | 23.81623 | 1.27E-72  | 1.71E-71  | 153.3677 |
| FHL2         | 4.718248 | 4.351679 | 51.88712 | 4.47E-157 | 1.04E-153 | 348.2464 |
| NCK2         | 1.509804 | 4.52333  | 24.17246 | 6.08E-74  | 8.55E-73  | 156.4144 |
| UXS1         | 2.022875 | 3.7505   | 33.09476 | 6.39E-105 | 3.55E-103 | 227.8717 |
| EEF1A1P12    | 1.302431 | 0.813937 | 36.70794 | 2.99E-116 | 3.35E-114 | 254.0174 |
| SULT1C2      | 1.939069 | 2.851483 | 11.82145 | 5.75E-27  | 2.66E-26  | 48.28543 |
| GCC2         | 1.325441 | 3.264491 | 19.59176 | 1.41E-56  | 1.22E-55  | 116.3905 |
| LIMS1        | 2.362217 | 3.534138 | 31.30048 | 4.92E-99  | 1.95E-97  | 214.2902 |
| EDAR         | 1.479145 | 0.767417 | 20.73428 | 5.66E-61  | 5.47E-60  | 126.5197 |
| SH3RF3       | 1.386764 | 1.482746 | 26.12123 | 4.59E-81  | 8.14E-80  | 172.8383 |
| 10-Sep       | 2.084791 | 3.644934 | 28.50624 | 1.61E-89  | 4.00E-88  | 192.3372 |
| SOWAHC       | 2.037658 | 1.92492  | 36.0383  | 3.34E-114 | 3.32E-112 | 249.291  |
| MALL         | 4.861997 | 3.637168 | 45.10427 | 4.53E-140 | 2.88E-137 | 308.9936 |
| NPHP1        | 1.00887  | 1.919362 | 20.50519 | 4.28E-60  | 4.03E-59  | 124.4945 |
| LINC00116    | 1.66439  | 4.875447 | 20.50919 | 4.13E-60  | 3.89E-59  | 124.5299 |
| P11-1223D19. | 1.002265 | 0.570208 | 18.65218 | 6.08E-53  | 4.81E-52  | 108.0173 |

|             |           |           |           |            |            |           |
|-------------|-----------|-----------|-----------|------------|------------|-----------|
| 11-1223D19. | 1. 008759 | 0. 502123 | 12. 91627 | 5. 86E-31  | 2. 94E-30  | 57. 44757 |
| BUB1        | 2. 14034  | 1. 176144 | 39. 10664 | 2. 12E-123 | 3. 61E-121 | 270. 5168 |
| BCL2L11     | 1. 040277 | 2. 596559 | 17. 72612 | 2. 38E-49  | 1. 74E-48  | 99. 74573 |
| MIR4435-2HG | 3. 586638 | 4. 473031 | 39. 18007 | 1. 29E-123 | 2. 24E-121 | 271. 0114 |
| TMEM87B     | 1. 746689 | 3. 189892 | 28. 72132 | 2. 89E-90  | 7. 45E-89  | 194. 0616 |
| FBLN7       | 1. 446655 | 1. 329638 | 22. 26155 | 8. 63E-67  | 9. 74E-66  | 139. 9258 |
| TTL         | 1. 103414 | 2. 738933 | 19. 12647 | 8. 86E-55  | 7. 34E-54  | 112. 2476 |
| SLC20A1     | 1. 873125 | 4. 351766 | 18. 81391 | 1. 44E-53  | 1. 15E-52  | 109. 4605 |
| CKAP2L      | 1. 381236 | 0. 727809 | 27. 98041 | 1. 11E-87  | 2. 51E-86  | 188. 0975 |
| IL1B        | 1. 440331 | 1. 231556 | 17. 99225 | 2. 20E-50  | 1. 65E-49  | 102. 1236 |
| IL1RN       | 4. 572279 | 2. 775534 | 42. 8991  | 3. 93E-134 | 1. 63E-131 | 295. 2876 |
| PSD4        | 1. 068436 | 4. 037063 | 15. 64181 | 2. 78E-41  | 1. 72E-40  | 81. 17546 |
| PAX8-AS1    | 1. 382129 | 3. 028936 | 7. 827742 | 7. 48E-14  | 2. 57E-13  | 18. 30541 |
| PAX8        | 1. 483914 | 1. 727991 | 10. 77542 | 2. 80E-23  | 1. 20E-22  | 39. 83413 |
| RPL23AP7    | 1. 80728  | 2. 181219 | 31. 60277 | 4. 88E-100 | 2. 04E-98  | 216. 6065 |
| SLC35F5     | 1. 009823 | 4. 39194  | 14. 25307 | 5. 71E-36  | 3. 16E-35  | 68. 96074 |
| ACTR3       | 2. 693512 | 5. 22956  | 31. 92896 | 4. 08E-101 | 1. 80E-99  | 219. 0931 |
| DPP10       | -1. 29419 | 1. 061097 | -28. 0104 | 8. 72E-88  | 1. 99E-86  | 188. 3404 |
| DPP10-AS1   | -2. 08941 | 1. 665574 | -28. 1574 | 2. 66E-88  | 6. 21E-87  | 189. 5284 |
| DDX18       | 1. 186142 | 3. 927769 | 19. 20921 | 4. 24E-55  | 3. 54E-54  | 112. 9849 |
| INSIG2      | 1. 274257 | 3. 778732 | 19. 29511 | 1. 97E-55  | 1. 66E-54  | 113. 7501 |
| MARCO       | 3. 380571 | 2. 133603 | 23. 32398 | 8. 72E-71  | 1. 11E-69  | 149. 1366 |
| C2orf76     | 1. 009308 | 2. 841398 | 20. 57341 | 2. 34E-60  | 2. 22E-59  | 125. 0979 |
| DBI         | 2. 374931 | 6. 690258 | 32. 66453 | 1. 59E-103 | 8. 18E-102 | 224. 6518 |
| TMEM37      | 2. 091028 | 3. 42925  | 22. 42649 | 2. 05E-67  | 2. 36E-66  | 141. 3624 |
| TMEM177     | 1. 485497 | 2. 442064 | 30. 68767 | 5. 53E-97  | 1. 98E-95  | 209. 5593 |
| PTPN4       | 1. 238117 | 2. 301531 | 24. 24098 | 3. 39E-74  | 4. 80E-73  | 156. 9989 |
| TMEM185B    | 1. 52156  | 2. 813746 | 27. 4622  | 7. 44E-86  | 1. 57E-84  | 183. 8861 |
| RALB        | 2. 652369 | 4. 291998 | 40. 90583 | 1. 41E-128 | 3. 50E-126 | 282. 4635 |
| INHBB       | 1. 555369 | 1. 911013 | 17. 43235 | 3. 28E-48  | 2. 34E-47  | 97. 1212  |
| GLI2        | 1. 622812 | 1. 015273 | 29. 94615 | 1. 78E-94  | 5. 63E-93  | 203. 7718 |
| TFCP2L1     | 1. 282208 | 1. 899533 | 16. 24782 | 1. 28E-43  | 8. 28E-43  | 86. 55661 |
| NIFK        | 1. 455299 | 4. 596438 | 22. 90558 | 3. 22E-69  | 3. 91E-68  | 145. 5217 |
| TSN         | 1. 752175 | 3. 991368 | 32. 10106 | 1. 11E-101 | 5. 06E-100 | 220. 3997 |
| GYPC        | 1. 313761 | 4. 393423 | 14. 66154 | 1. 60E-37  | 9. 17E-37  | 72. 5321  |
| BIN1        | 1. 806142 | 4. 121075 | 27. 36944 | 1. 58E-85  | 3. 30E-84  | 183. 1288 |
| MAP3K2      | 1. 293147 | 2. 515597 | 23. 45493 | 2. 83E-71  | 3. 63E-70  | 150. 2645 |
| PROC        | 2. 097541 | 1. 344712 | 26. 19335 | 2. 52E-81  | 4. 51E-80  | 173. 4379 |
| IWS1        | 1. 61278  | 3. 754771 | 30. 11179 | 4. 88E-95  | 1. 59E-93  | 205. 0706 |
| MYO7B       | 2. 850194 | 1. 868108 | 21. 12162 | 1. 86E-62  | 1. 87E-61  | 129. 936  |
| LIMS2       | 1. 556606 | 3. 594964 | 17. 50306 | 1. 74E-48  | 1. 25E-47  | 97. 75287 |
| WDR33       | 1. 011376 | 3. 551262 | 19. 2426  | 3. 15E-55  | 2. 64E-54  | 113. 2824 |
| POLR2D      | 1. 471239 | 2. 89714  | 28. 57326 | 9. 43E-90  | 2. 36E-88  | 192. 8752 |
| AC006011.4  | 1. 564465 | 2. 408265 | 19. 81942 | 1. 86E-57  | 1. 65E-56  | 118. 4142 |
| AMMECR1L    | 1. 015724 | 2. 743755 | 20. 86202 | 1. 83E-61  | 1. 79E-60  | 127. 6475 |
| SAP130      | 1. 053267 | 2. 561856 | 22. 73316 | 1. 43E-68  | 1. 71E-67  | 144. 0272 |
| UGGT1       | 1. 28347  | 3. 319063 | 23. 66173 | 4. 79E-72  | 6. 28E-71  | 152. 0423 |
| HS6ST1      | 1. 23865  | 4. 120895 | 14. 45037 | 1. 02E-36  | 5. 73E-36  | 70. 68318 |
| CCDC74B     | 1. 126534 | 1. 244334 | 18. 76494 | 2. 22E-53  | 1. 78E-52  | 109. 0236 |
| SMPD4       | 1. 007483 | 4. 414587 | 16. 02459 | 9. 30E-43  | 5. 93E-42  | 84. 57182 |
| CCDC115     | 1. 922769 | 4. 178025 | 32. 68098 | 1. 40E-103 | 7. 26E-102 | 224. 7753 |
| ARHGEF4     | -1. 21344 | 3. 203645 | -14. 5305 | 5. 04E-37  | 2. 86E-36  | 71. 38397 |
| PLEKHB2     | 2. 183641 | 4. 097131 | 35. 40544 | 3. 02E-112 | 2. 61E-110 | 244. 7748 |
| MZT2A       | 1. 149969 | 5. 904596 | 12. 7282  | 2. 89E-30  | 1. 43E-29  | 55. 85407 |

|             |           |           |           |            |            |           |
|-------------|-----------|-----------|-----------|------------|------------|-----------|
| CCDC74A     | 2. 378114 | 2. 365417 | 33. 56581 | 1. 95E-106 | 1. 18E-104 | 231. 3708 |
| C2orf27A    | 1. 088745 | 2. 02115  | 17. 59765 | 7. 49E-49  | 5. 42E-48  | 98. 598   |
| GPR39       | 1. 586975 | 1. 876087 | 25. 75282 | 9. 86E-80  | 1. 67E-78  | 169. 766  |
| LYPD1       | 1. 791456 | 2. 396952 | 13. 70203 | 6. 87E-34  | 3. 67E-33  | 64. 17896 |
| MGAT5       | 1. 62901  | 2. 97976  | 26. 63814 | 6. 37E-83  | 1. 21E-81  | 177. 1223 |
| RAB3GAP1    | 1. 123585 | 3. 873506 | 14. 68516 | 1. 30E-37  | 7. 47E-37  | 72. 73921 |
| R3HDM1      | 1. 074724 | 2. 713936 | 21. 87375 | 2. 54E-65  | 2. 76E-64  | 136. 5388 |
| MCM6        | 2. 308131 | 2. 514247 | 41. 54669 | 2. 21E-130 | 6. 39E-128 | 286. 6329 |
| DARS        | 1. 396462 | 4. 653128 | 20. 77882 | 3. 82E-61  | 3. 70E-60  | 126. 913  |
| CXCR4       | 4. 203669 | 3. 896753 | 36. 17247 | 1. 29E-114 | 1. 31E-112 | 250. 2422 |
| HNMT        | 2. 190204 | 4. 562663 | 29. 49712 | 6. 09E-93  | 1. 78E-91  | 200. 2337 |
| SPOPL       | 1. 36094  | 2. 257035 | 23. 45339 | 2. 86E-71  | 3. 68E-70  | 150. 2512 |
| KYNU        | 3. 410075 | 1. 956495 | 49. 35461 | 6. 15E-151 | 8. 86E-148 | 334. 0768 |
| ARHGAP15    | 2. 139433 | 1. 731341 | 25. 26814 | 5. 71E-78  | 9. 18E-77  | 165. 7006 |
| GTDC1       | 1. 549587 | 2. 535349 | 27. 34609 | 1. 92E-85  | 3. 97E-84  | 182. 938  |
| ZEB2        | 1. 936716 | 2. 388478 | 23. 05608 | 8. 78E-70  | 1. 08E-68  | 146. 8239 |
| ACVR2A      | 1. 085301 | 2. 226995 | 21. 11616 | 1. 95E-62  | 1. 96E-61  | 129. 8879 |
| ORC4        | 1. 228474 | 3. 168968 | 18. 19247 | 3. 68E-51  | 2. 80E-50  | 103. 9123 |
| MBD5        | 1. 450019 | 2. 376957 | 26. 45584 | 2. 87E-82  | 5. 31E-81  | 175. 615  |
| EPC2        | 1. 091722 | 2. 647207 | 18. 96854 | 3. 62E-54  | 2. 95E-53  | 110. 8397 |
| LYPD6B      | 1. 73481  | 2. 968266 | 17. 04883 | 1. 01E-46  | 6. 99E-46  | 93. 69645 |
| RND3        | 3. 013184 | 3. 015525 | 38. 81705 | 1. 49E-122 | 2. 48E-120 | 268. 56   |
| RBM43       | 1. 177114 | 1. 681775 | 24. 98139 | 6. 38E-77  | 9. 87E-76  | 163. 283  |
| NMI         | 2. 599432 | 3. 220014 | 39. 9208  | 9. 22E-126 | 1. 85E-123 | 275. 9674 |
| TNFAIP6     | 2. 973992 | 1. 621484 | 34. 27187 | 1. 09E-108 | 7. 64E-107 | 236. 5643 |
| ARL5A       | 1. 424559 | 3. 051997 | 22. 81256 | 7. 21E-69  | 8. 64E-68  | 144. 7157 |
| PRPF40A     | 1. 416636 | 4. 204797 | 21. 70931 | 1. 07E-64  | 1. 14E-63  | 135. 0989 |
| ARL6IP6     | 1. 643922 | 2. 880524 | 23. 10502 | 5. 75E-70  | 7. 13E-69  | 147. 2469 |
| GPD2        | 1. 75518  | 2. 637443 | 28. 33541 | 6. 36E-89  | 1. 53E-87  | 190. 9636 |
| GALNT5      | 3. 281847 | 1. 613507 | 35. 90014 | 8. 89E-114 | 8. 54E-112 | 248. 3091 |
| CYTIP       | 2. 036289 | 2. 087834 | 23. 13942 | 4. 28E-70  | 5. 32E-69  | 147. 5441 |
| ACVR1       | 2. 457285 | 3. 401049 | 35. 98275 | 4. 95E-114 | 4. 85E-112 | 248. 8965 |
| PKP4        | 1. 483123 | 4. 21962  | 23. 68365 | 3. 97E-72  | 5. 23E-71  | 152. 2305 |
| BTF3L4P2    | 1. 125113 | 4. 379299 | 15. 787   | 7. 68E-42  | 4. 80E-41  | 82. 46257 |
| 7-Mar       | 1. 666008 | 3. 86186  | 24. 39862 | 8. 87E-75  | 1. 28E-73  | 158. 3418 |
| LY75        | 3. 046677 | 2. 072686 | 40. 92409 | 1. 25E-128 | 3. 12E-126 | 282. 5829 |
| PLA2R1      | 2. 170049 | 1. 480144 | 36. 85205 | 1. 09E-116 | 1. 25E-114 | 255. 0276 |
| ITGB6       | 2. 911321 | 4. 275087 | 25. 58463 | 4. 02E-79  | 6. 70E-78  | 168. 3583 |
| RBMS1       | 2. 289344 | 3. 540417 | 29. 63164 | 2. 11E-93  | 6. 31E-92  | 201. 2963 |
| TANK        | 1. 824506 | 4. 030532 | 27. 76232 | 6. 49E-87  | 1. 43E-85  | 186. 3291 |
| PSMD14      | 2. 294129 | 3. 94219  | 38. 29388 | 5. 20E-121 | 7. 79E-119 | 265. 0007 |
| DPP4        | 1. 876801 | 1. 755236 | 22. 24086 | 1. 03E-66  | 1. 16E-65  | 139. 7454 |
| FAP         | 3. 616114 | 3. 235024 | 33. 676   | 8. 64E-107 | 5. 35E-105 | 232. 1853 |
| IFIH1       | 1. 579097 | 2. 736153 | 17. 5148  | 1. 57E-48  | 1. 13E-47  | 97. 85782 |
| GCA         | 1. 061407 | 3. 875444 | 16. 62415 | 4. 46E-45  | 2. 99E-44  | 89. 90813 |
| GRB14       | -1. 66178 | 2. 943254 | -18. 6779 | 4. 83E-53  | 3. 84E-52  | 108. 2473 |
| P11-452N17. | 3. 020361 | 3. 885284 | 31. 57642 | 5. 96E-100 | 2. 48E-98  | 216. 4051 |
| GALNT3      | 1. 865546 | 4. 420451 | 21. 78154 | 5. 69E-65  | 6. 12E-64  | 135. 7317 |
| STK39       | 1. 803945 | 3. 99167  | 25. 17577 | 1. 24E-77  | 1. 97E-76  | 164. 9228 |
| CERS6       | 2. 296102 | 2. 475042 | 32. 25583 | 3. 44E-102 | 1. 62E-100 | 221. 5716 |
| CERS6-AS1   | 2. 478189 | 3. 092906 | 28. 30212 | 8. 31E-89  | 1. 99E-87  | 190. 6955 |
| SPC25       | 1. 815101 | 1. 371729 | 31. 36219 | 3. 07E-99  | 1. 22E-97  | 214. 764  |
| DHRS9       | 4. 131218 | 2. 158542 | 24. 048   | 1. 76E-73  | 2. 43E-72  | 155. 3515 |
| PPIG        | 1. 329464 | 3. 924432 | 21. 72735 | 9. 15E-65  | 9. 78E-64  | 135. 257  |

|             |           |           |           |            |            |           |
|-------------|-----------|-----------|-----------|------------|------------|-----------|
| KLHL23      | 1. 516121 | 1. 760204 | 21. 86576 | 2. 73E-65  | 2. 96E-64  | 136. 4689 |
| SSB         | 1. 873931 | 5. 125187 | 28. 4308  | 2. 95E-89  | 7. 23E-88  | 191. 7311 |
| METTL5      | 1. 116275 | 4. 910244 | 19. 0327  | 2. 04E-54  | 1. 68E-53  | 111. 4117 |
| GAD1        | 1. 147493 | 0. 848489 | 18. 00347 | 1. 99E-50  | 1. 49E-49  | 102. 2238 |
| GORASP2     | 1. 108008 | 5. 177673 | 16. 82948 | 7. 14E-46  | 4. 87E-45  | 91. 73912 |
| TLK1        | 1. 333317 | 3. 124609 | 24. 09072 | 1. 22E-73  | 1. 70E-72  | 155. 7165 |
| METTL8      | 1. 454096 | 1. 939537 | 26. 74309 | 2. 68E-83  | 5. 16E-82  | 177. 9882 |
| CYBRD1      | 2. 92424  | 3. 907367 | 28. 09331 | 4. 47E-88  | 1. 03E-86  | 189. 0107 |
| DYNC1I2     | 1. 646504 | 5. 025913 | 24. 08671 | 1. 26E-73  | 1. 75E-72  | 155. 6822 |
| SLC25A12    | 1. 790601 | 2. 375032 | 28. 48372 | 1. 93E-89  | 4. 77E-88  | 192. 1564 |
| HAT1        | 1. 18101  | 4. 079883 | 19. 52545 | 2. 54E-56  | 2. 18E-55  | 115. 8005 |
| ITGA6       | 1. 788681 | 5. 026379 | 20. 17188 | 8. 18E-59  | 7. 45E-58  | 121. 5425 |
| pk          | 1. 528733 | 2. 58629  | 22. 6103  | 4. 16E-68  | 4. 88E-67  | 142. 9607 |
| CDC47       | 2. 493701 | 2. 015883 | 24. 40748 | 8. 23E-75  | 1. 19E-73  | 158. 4171 |
| P11-796E10. | 1. 15685  | 0. 551226 | 17. 64745 | 4. 80E-49  | 3. 49E-48  | 99. 04292 |
| SP3         | 1. 664056 | 3. 744029 | 25. 69266 | 1. 63E-79  | 2. 75E-78  | 169. 2629 |
| OLA1        | 1. 514903 | 5. 268842 | 22. 08956 | 3. 86E-66  | 4. 28E-65  | 138. 4252 |
| CIR1        | 1. 244932 | 4. 08978  | 21. 42606 | 1. 28E-63  | 1. 33E-62  | 132. 6138 |
| WIPF1       | 2. 670582 | 3. 148871 | 30. 00963 | 1. 08E-94  | 3. 47E-93  | 204. 2699 |
| H3F3AP4     | 2. 432506 | 6. 521973 | 23. 66505 | 4. 65E-72  | 6. 11E-71  | 152. 0708 |
| CHN1        | 2. 228897 | 2. 374461 | 27. 31589 | 2. 45E-85  | 5. 07E-84  | 182. 6912 |
| ATF2        | 1. 333916 | 3. 201272 | 23. 20079 | 2. 52E-70  | 3. 16E-69  | 148. 074  |
| ATP5G3      | 2. 035736 | 6. 592424 | 29. 24144 | 4. 60E-92  | 1. 29E-90  | 198. 2078 |
| KIAA1715    | 1. 614647 | 1. 949854 | 30. 02312 | 9. 76E-95  | 3. 13E-93  | 204. 3758 |
| HOXD9       | 1. 03043  | 0. 681108 | 24. 39473 | 9. 17E-75  | 1. 32E-73  | 158. 3086 |
| HOXD8       | 1. 230479 | 1. 095104 | 24. 96166 | 7. 54E-77  | 1. 16E-75  | 163. 1163 |
| AC016739. 2 | 1. 659938 | 3. 490231 | 18. 51885 | 2. 00E-52  | 1. 56E-51  | 106. 827  |
| MTX2        | 1. 330165 | 4. 155898 | 23. 05378 | 8. 96E-70  | 1. 10E-68  | 146. 804  |
| LINC01116   | 1. 381805 | 0. 949279 | 22. 14623 | 2. 36E-66  | 2. 63E-65  | 138. 9199 |
| HNRNPA3     | 1. 942588 | 6. 560572 | 26. 49102 | 2. 14E-82  | 3. 99E-81  | 175. 9062 |
| NFE2L2      | 1. 976627 | 4. 826913 | 26. 50509 | 1. 91E-82  | 3. 56E-81  | 176. 0226 |
| AGPS        | 1. 266806 | 2. 503877 | 25. 1308  | 1. 81E-77  | 2. 86E-76  | 164. 5438 |
| FKBP7       | 2. 651904 | 2. 692599 | 35. 85342 | 1. 24E-113 | 1. 17E-111 | 247. 9766 |
| PLEKHA3     | 1. 412813 | 2. 263534 | 21. 05466 | 3. 36E-62  | 3. 34E-61  | 129. 3461 |
| SESTD1      | 2. 207111 | 3. 282827 | 27. 9508  | 1. 41E-87  | 3. 18E-86  | 187. 8578 |
| CWC22       | 1. 449663 | 2. 727312 | 29. 1478  | 9. 67E-92  | 2. 69E-90  | 197. 4639 |
| FTH1P20     | 2. 878483 | 2. 417935 | 43. 43723 | 1. 33E-135 | 6. 07E-133 | 298. 678  |
| UBE2E3      | 1. 601015 | 5. 295933 | 23. 30088 | 1. 06E-70  | 1. 35E-69  | 148. 9374 |
| ITGA4       | 1. 611096 | 1. 195989 | 20. 52136 | 3. 71E-60  | 3. 50E-59  | 124. 6376 |
| CERKL       | 1. 673104 | 1. 190159 | 27. 15396 | 9. 21E-85  | 1. 86E-83  | 181. 3656 |
| PPP1R1C     | 1. 801471 | 1. 619571 | 23. 73092 | 2. 64E-72  | 3. 51E-71  | 152. 6362 |
| PDE1A       | 1. 880723 | 1. 653062 | 25. 55892 | 4. 98E-79  | 8. 28E-78  | 168. 1429 |
| DNAJC10     | 1. 238503 | 4. 820464 | 16. 86809 | 5. 06E-46  | 3. 46E-45  | 92. 08354 |
| FRZB        | 2. 419928 | 2. 127572 | 26. 08633 | 6. 13E-81  | 1. 08E-79  | 172. 548  |
| NCKAP1      | 1. 516961 | 4. 880883 | 20. 05683 | 2. 27E-58  | 2. 04E-57  | 120. 522  |
| ZC3H15      | 1. 062142 | 4. 614088 | 17. 60076 | 7. 28E-49  | 5. 27E-48  | 98. 62571 |
| ITGAV       | 2. 314417 | 4. 04555  | 27. 66625 | 1. 42E-86  | 3. 07E-85  | 185. 5483 |
| FAM171B     | 1. 071736 | 0. 832841 | 20. 82504 | 2. 54E-61  | 2. 47E-60  | 127. 3211 |
| CALCRL      | 1. 999025 | 2. 056415 | 23. 65244 | 5. 18E-72  | 6. 79E-71  | 151. 9626 |
| TFPI        | 2. 601681 | 4. 079036 | 23. 58544 | 9. 21E-72  | 1. 20E-70  | 151. 387  |
| COL3A1      | 6. 090942 | 6. 767549 | 42. 01156 | 1. 11E-131 | 3. 75E-129 | 289. 6297 |
| AC066694. 1 | 1. 558392 | 1. 040979 | 6. 027216 | 4. 63E-09  | 1. 37E-08  | 7. 456787 |
| COL5A2      | 4. 748771 | 3. 761043 | 41. 75494 | 5. 76E-131 | 1. 78E-128 | 287. 9782 |
| SLC40A1     | 2. 263838 | 4. 991925 | 22. 79943 | 8. 08E-69  | 9. 67E-68  | 144. 6019 |

|            |          |          |          |           |           |          |
|------------|----------|----------|----------|-----------|-----------|----------|
| ASNSD1     | 1.460605 | 3.593974 | 28.13883 | 3.09E-88  | 7.19E-87  | 189.3784 |
| HNRNPCP2   | 2.872434 | 1.97936  | 58.74604 | 1.41E-172 | 1.07E-168 | 384.026  |
| INPP1      | 1.25974  | 4.271536 | 17.07748 | 7.81E-47  | 5.42E-46  | 93.95217 |
| MFS6       | 2.033281 | 3.357978 | 31.98056 | 2.76E-101 | 1.23E-99  | 219.4853 |
| NEMP2      | 1.176734 | 1.132981 | 24.87976 | 1.50E-76  | 2.31E-75  | 162.4239 |
| NAB1       | 1.901048 | 3.201198 | 28.76728 | 2.00E-90  | 5.19E-89  | 194.4293 |
| STAT1      | 2.653944 | 4.461728 | 30.29674 | 1.15E-95  | 3.84E-94  | 206.5167 |
| NABP1      | 1.347157 | 2.876229 | 16.50594 | 1.28E-44  | 8.48E-44  | 88.85475 |
| SLC39A10   | 1.092011 | 2.719119 | 16.08563 | 5.40E-43  | 3.46E-42  | 85.11429 |
| STK17B     | 2.137906 | 2.437299 | 29.86306 | 3.42E-94  | 1.07E-92  | 203.119  |
| HECW2      | 1.016475 | 0.859291 | 21.33742 | 2.79E-63  | 2.87E-62  | 131.8348 |
| AC020571.3 | 1.028982 | 0.560954 | 23.79189 | 1.57E-72  | 2.10E-71  | 153.1591 |
| COQ10B     | 1.897266 | 3.324547 | 32.47373 | 6.66E-103 | 3.28E-101 | 223.2164 |
| HSPE1      | 1.735873 | 6.452409 | 19.92616 | 7.23E-58  | 6.44E-57  | 119.3623 |
| HSPE1-MOB4 | 1.47355  | 1.703124 | 16.12026 | 3.97E-43  | 2.55E-42  | 85.42216 |
| MOB4       | 1.793249 | 3.372632 | 29.74452 | 8.68E-94  | 2.65E-92  | 202.1862 |
| C2orf47    | 1.409866 | 2.997779 | 28.59773 | 7.75E-90  | 1.96E-88  | 193.0715 |
| SPATS2L    | 3.000232 | 5.527589 | 38.51082 | 1.19E-121 | 1.87E-119 | 266.4804 |
| SGOL2      | 1.065248 | 0.781344 | 28.2884  | 9.28E-89  | 2.22E-87  | 190.585  |
| AOX1       | -2.82462 | 3.693165 | -24.2156 | 4.21E-74  | 5.94E-73  | 156.7826 |
| BZW1       | 2.573454 | 4.998486 | 31.0989  | 2.31E-98  | 8.87E-97  | 212.7392 |
| PPIL3      | 1.096267 | 3.866274 | 16.22387 | 1.58E-43  | 1.02E-42  | 86.34355 |
| NIF3L1     | 1.322629 | 3.315075 | 26.20583 | 2.27E-81  | 4.07E-80  | 173.5416 |
| NDUFB3     | 2.244099 | 5.13792  | 35.84289 | 1.34E-113 | 1.25E-111 | 247.9016 |
| CFLAR      | 1.692144 | 4.814774 | 23.05735 | 8.68E-70  | 1.07E-68  | 146.8348 |
| AC007283.5 | 2.469755 | 1.377969 | 38.72399 | 2.80E-122 | 4.56E-120 | 267.9292 |
| CASP10     | 1.416479 | 2.336658 | 25.91457 | 2.56E-80  | 4.42E-79  | 171.1169 |
| CASP8      | 1.876044 | 3.148808 | 28.45986 | 2.34E-89  | 5.75E-88  | 191.9647 |
| TRAK2      | 1.039407 | 2.829466 | 18.33222 | 1.06E-51  | 8.15E-51  | 105.1605 |
| TMEM237    | 1.204594 | 2.337776 | 21.832   | 3.66E-65  | 3.96E-64  | 136.1735 |
| ALS2       | 1.045331 | 2.239395 | 20.50515 | 4.28E-60  | 4.03E-59  | 124.4942 |
| FZD7       | 2.274368 | 1.791834 | 33.4902  | 3.40E-106 | 2.04E-104 | 230.811  |
| SUMO1      | 2.534156 | 5.351326 | 40.73639 | 4.27E-128 | 1.02E-125 | 281.3536 |
| BMPR2      | 2.222489 | 2.581939 | 35.16444 | 1.70E-111 | 1.41E-109 | 243.0423 |
| FAM117B    | 1.01059  | 1.709503 | 23.26622 | 1.43E-70  | 1.81E-69  | 148.6386 |
| WDR12      | 1.389853 | 3.797672 | 21.46078 | 9.46E-64  | 9.83E-63  | 132.9188 |
| ABI2       | 1.925127 | 2.955759 | 28.90602 | 6.61E-91  | 1.76E-89  | 195.5379 |
| RAPH1      | 1.73493  | 2.153613 | 25.34909 | 2.89E-78  | 4.69E-77  | 166.3815 |
| CTLA4      | 1.136631 | 0.647167 | 20.02316 | 3.06E-58  | 2.75E-57  | 120.2233 |
| PARD3B     | 1.11195  | 1.675773 | 20.58331 | 2.15E-60  | 2.04E-59  | 125.1854 |
| NRP2       | 3.705612 | 2.600039 | 42.99741 | 2.11E-134 | 8.99E-132 | 295.9093 |
| AC007383.3 | 1.397507 | 1.966127 | 26.86318 | 9.99E-84  | 1.95E-82  | 178.9774 |
| NDUFS1     | 1.545789 | 3.829924 | 23.78252 | 1.70E-72  | 2.27E-71  | 153.0788 |
| ADAM23     | 1.294933 | 0.895772 | 20.46928 | 5.88E-60  | 5.52E-59  | 124.1768 |
| FASTKD2    | 1.07093  | 3.144412 | 21.62867 | 2.17E-64  | 2.30E-63  | 134.3921 |
| KLF7       | 1.778402 | 2.184983 | 25.3268  | 3.49E-78  | 5.65E-77  | 166.1941 |
| CREB1      | 1.355634 | 2.707061 | 21.78579 | 5.49E-65  | 5.90E-64  | 135.7689 |
| METTL21A   | 1.342468 | 2.813186 | 26.68346 | 4.38E-83  | 8.37E-82  | 177.4963 |
| AC079767.4 | 1.406644 | 0.704894 | 17.74061 | 2.09E-49  | 1.53E-48  | 99.87524 |
| IDH1       | 2.083707 | 4.978002 | 26.99994 | 3.25E-84  | 6.46E-83  | 180.102  |
| RPE        | 2.077585 | 3.3348   | 32.66112 | 1.63E-103 | 8.37E-102 | 224.6262 |
| ACADL      | -3.21237 | 2.569793 | -41.9876 | 1.29E-131 | 4.30E-129 | 289.476  |
| IKZF2      | 1.044167 | 1.180448 | 20.0453  | 2.51E-58  | 2.26E-57  | 120.4197 |
| SPAG16     | 1.589165 | 3.54795  | 24.93254 | 9.64E-77  | 1.49E-75  | 162.8702 |



|             |          |          |          |           |           |          |
|-------------|----------|----------|----------|-----------|-----------|----------|
| ATIC        | 1.728511 | 5.563934 | 24.63336 | 1.21E-75  | 1.80E-74  | 160.3365 |
| FN1         | 5.756499 | 7.033786 | 38.36608 | 3.18E-121 | 4.90E-119 | 265.4937 |
| AC093850.2  | 2.655003 | 1.313793 | 27.0106  | 2.98E-84  | 5.93E-83  | 180.1895 |
| MREG        | 1.66808  | 1.635006 | 37.40478 | 2.34E-118 | 2.96E-116 | 258.8795 |
| PECR        | 1.905659 | 2.396985 | 31.38092 | 2.66E-99  | 1.07E-97  | 214.9077 |
| XRCC5       | 1.928766 | 5.687412 | 28.84603 | 1.07E-90  | 2.81E-89  | 195.0588 |
| SMARCAL1    | 1.649061 | 2.776951 | 34.90629 | 1.09E-110 | 8.61E-109 | 241.1787 |
| IGFBP5      | 4.027384 | 5.323226 | 30.31306 | 1.01E-95  | 3.39E-94  | 206.6441 |
| ARPC2       | 2.775021 | 6.678088 | 38.14065 | 1.48E-120 | 2.16E-118 | 263.9522 |
| GPBAR1      | 2.09068  | 1.731572 | 24.32636 | 1.64E-74  | 2.35E-73  | 157.7265 |
| AAMP        | 1.591626 | 5.879451 | 24.59519 | 1.67E-75  | 2.47E-74  | 160.0125 |
| PNKD        | 1.989536 | 5.165207 | 30.8535  | 1.53E-97  | 5.63E-96  | 210.8442 |
| TMBIM1      | 1.538567 | 7.228326 | 17.0512  | 9.87E-47  | 6.85E-46  | 93.71762 |
| SLC11A1     | 1.657614 | 3.013327 | 12.40472 | 4.44E-29  | 2.15E-28  | 53.13142 |
| CTDSP1      | 1.297303 | 5.863755 | 18.80345 | 1.58E-53  | 1.27E-52  | 109.3672 |
| VIL1        | 1.544585 | 3.380519 | 11.04074 | 3.35E-24  | 1.46E-23  | 41.94557 |
| RQCD1       | 1.284153 | 3.587656 | 22.91496 | 2.97E-69  | 3.61E-68  | 145.6029 |
| RNF25       | 1.741648 | 3.735555 | 31.52781 | 8.64E-100 | 3.56E-98  | 216.0332 |
| CYP27A1     | 2.716097 | 3.378164 | 32.98397 | 1.46E-104 | 7.95E-103 | 227.0447 |
| WNT10A      | 2.676642 | 1.347358 | 27.19569 | 6.55E-85  | 1.33E-83  | 181.7075 |
| IHH         | 2.709334 | 1.345724 | 22.63999 | 3.22E-68  | 3.79E-67  | 143.2185 |
| CNPPD1      | 1.272411 | 4.946959 | 19.48742 | 3.56E-56  | 3.05E-55  | 115.4622 |
| FAM134A     | 1.322836 | 5.422725 | 19.98069 | 4.46E-58  | 3.98E-57  | 119.8463 |
| ABCB6       | 1.371852 | 3.305858 | 20.57524 | 2.30E-60  | 2.19E-59  | 125.1141 |
| ATG9A       | 1.145795 | 4.224113 | 19.14818 | 7.30E-55  | 6.06E-54  | 112.4411 |
| GLB1L       | 1.381944 | 2.079573 | 24.50472 | 3.60E-75  | 5.27E-74  | 159.2441 |
| STK16       | 1.126735 | 4.580866 | 19.60774 | 1.22E-56  | 1.06E-55  | 116.5326 |
| TUBA4A      | 2.726683 | 5.06955  | 34.50722 | 1.97E-109 | 1.44E-107 | 238.2818 |
| DNPEP       | 1.389958 | 5.205194 | 21.52863 | 5.22E-64  | 5.46E-63  | 133.5144 |
| SPEG        | 1.041759 | 2.305509 | 10.63439 | 8.56E-23  | 3.62E-22  | 38.72155 |
| CHPF        | 1.166406 | 6.066758 | 13.51114 | 3.57E-33  | 1.88E-32  | 62.53352 |
| P11-256I23. | -1.15321 | 0.952305 | -25.7874 | 7.39E-80  | 1.26E-78  | 170.0548 |
| EPHA4       | 2.153665 | 1.562673 | 28.75771 | 2.16E-90  | 5.60E-89  | 194.3528 |
| SGPP2       | 3.091397 | 2.493277 | 34.48898 | 2.25E-109 | 1.64E-107 | 238.1489 |
| FARSB       | 1.280622 | 3.313432 | 25.23856 | 7.32E-78  | 1.17E-76  | 165.4517 |
| ACSL3       | 2.359365 | 4.058366 | 36.42505 | 2.18E-115 | 2.31E-113 | 252.0272 |
| KCNE4       | 1.567346 | 2.52366  | 13.20287 | 5.06E-32  | 2.60E-31  | 59.88958 |
| SCG2        | 1.544815 | 3.065031 | 10.74005 | 3.71E-23  | 1.58E-22  | 39.55446 |
| AP1S3       | 2.657544 | 2.070107 | 33.14602 | 4.37E-105 | 2.45E-103 | 228.2538 |
| WDFY1       | 1.732503 | 3.288452 | 26.23454 | 1.79E-81  | 3.22E-80  | 173.7801 |
| MRPL44      | 1.588868 | 3.468901 | 29.75827 | 7.79E-94  | 2.38E-92  | 202.2945 |
| SERPINE2    | 3.312273 | 3.120748 | 28.7334  | 2.62E-90  | 6.78E-89  | 194.1583 |
| CUL3        | 1.552488 | 4.743524 | 27.24471 | 4.39E-85  | 8.97E-84  | 182.1088 |
| DOCK10      | 1.814197 | 1.750042 | 22.16389 | 2.02E-66  | 2.26E-65  | 139.074  |
| IRS1        | 1.837457 | 2.173909 | 28.70551 | 3.27E-90  | 8.43E-89  | 193.9351 |
| RHBDD1      | 1.193629 | 2.572949 | 23.14772 | 3.98E-70  | 4.96E-69  | 147.6158 |
| TM4SF20     | 1.392259 | 0.691751 | 9.412111 | 1.03E-18  | 3.97E-18  | 29.39281 |
| AGFG1       | 1.82448  | 4.379356 | 24.57922 | 1.91E-75  | 2.83E-74  | 159.877  |
| SLC19A3     | 1.175564 | 1.40946  | 13.48797 | 4.37E-33  | 2.29E-32  | 62.33416 |
| CCL20       | 4.048331 | 2.558654 | 30.50874 | 2.21E-96  | 7.65E-95  | 208.1691 |
| TRIP12      | 1.698874 | 4.481304 | 25.25545 | 6.35E-78  | 1.02E-76  | 165.5938 |
| SP110       | 2.006186 | 3.386394 | 26.93284 | 5.64E-84  | 1.11E-82  | 179.5505 |
| SP140       | 1.683377 | 1.270911 | 21.99037 | 9.18E-66  | 1.01E-64  | 137.5587 |
| SP140L      | 1.83596  | 2.943096 | 24.61505 | 1.41E-75  | 2.10E-74  | 160.1811 |

|              |           |           |           |            |            |           |
|--------------|-----------|-----------|-----------|------------|------------|-----------|
| SP100        | 1. 726381 | 5. 09873  | 23. 35425 | 6. 72E-71  | 8. 54E-70  | 149. 3975 |
| CAB39        | 1. 981744 | 4. 142413 | 31. 53639 | 8. 09E-100 | 3. 34E-98  | 216. 0989 |
| ITM2C        | 2. 457585 | 5. 557803 | 30. 80217 | 2. 28E-97  | 8. 32E-96  | 210. 4468 |
| PSMD1        | 2. 376992 | 4. 490076 | 38. 30576 | 4. 80E-121 | 7. 21E-119 | 265. 0819 |
| HTR2B        | 1. 555007 | 0. 899102 | 21. 49887 | 6. 77E-64  | 7. 06E-63  | 133. 2532 |
| ARMC9        | 1. 971025 | 2. 476265 | 30. 92507 | 8. 82E-98  | 3. 29E-96  | 211. 3976 |
| B3GNT7       | 1. 752851 | 3. 321038 | 17. 45763 | 2. 62E-48  | 1. 87E-47  | 97. 34703 |
| NCL          | 1. 187283 | 7. 3222   | 14. 14046 | 1. 52E-35  | 8. 38E-35  | 67. 97998 |
| PTMA         | 1. 715971 | 9. 393286 | 17. 77512 | 1. 53E-49  | 1. 13E-48  | 100. 1835 |
| PDE6D        | 1. 686893 | 3. 35666  | 32. 10479 | 1. 08E-101 | 4. 93E-100 | 220. 428  |
| DIS3L2       | 1. 081099 | 3. 262065 | 21. 00004 | 5. 43E-62  | 5. 38E-61  | 128. 8648 |
| ALPP         | 1. 075763 | 0. 524654 | 11. 01017 | 4. 29E-24  | 1. 87E-23  | 41. 70111 |
| ECEL1        | 1. 101333 | 0. 837095 | 14. 86366 | 2. 70E-38  | 1. 57E-37  | 74. 30659 |
| EIF4E2       | 1. 945484 | 4. 96544  | 32. 20075 | 5. 21E-102 | 2. 43E-100 | 221. 1549 |
| EFHD1        | 1. 302414 | 2. 123876 | 15. 71894 | 1. 40E-41  | 8. 73E-41  | 81. 85907 |
| NGEF         | 1. 640593 | 2. 51518  | 21. 1397  | 1. 59E-62  | 1. 60E-61  | 130. 0952 |
| AC106876. 2  | 1. 429754 | 1. 418984 | 16. 98075 | 1. 85E-46  | 1. 28E-45  | 93. 08879 |
| INPP5D       | 2. 170605 | 2. 478164 | 16. 50286 | 1. 32E-44  | 8. 71E-44  | 88. 82736 |
| ATG16L1      | 1. 511123 | 3. 270463 | 27. 81702 | 4. 17E-87  | 9. 22E-86  | 186. 7732 |
| DGKD         | 1. 033504 | 2. 64561  | 15. 71875 | 1. 41E-41  | 8. 74E-41  | 81. 85738 |
| UGT1A10      | 4. 482003 | 2. 158152 | 33. 08691 | 6. 78E-105 | 3. 76E-103 | 227. 8132 |
| UGT1A6       | 2. 581519 | 1. 301736 | 23. 30635 | 1. 01E-70  | 1. 29E-69  | 148. 9846 |
| UGT1A1       | 1. 203137 | 0. 594591 | 13. 86822 | 1. 63E-34  | 8. 79E-34  | 65. 61635 |
| HJURP        | 2. 059372 | 1. 159961 | 35. 82973 | 1. 47E-113 | 1. 37E-111 | 247. 8079 |
| MSL3P1       | 1. 504967 | 1. 146351 | 25. 30664 | 4. 13E-78  | 6. 67E-77  | 166. 0246 |
| ARL4C        | 3. 64532  | 3. 239115 | 40. 7635  | 3. 58E-128 | 8. 63E-126 | 281. 5314 |
| AGAP1        | 1. 39451  | 2. 350532 | 25. 38239 | 2. 19E-78  | 3. 57E-77  | 166. 6613 |
| COPS8        | 2. 144881 | 4. 205581 | 31. 96213 | 3. 17E-101 | 1. 40E-99  | 219. 3452 |
| COL6A3       | 3. 426976 | 5. 533632 | 24. 40294 | 8. 55E-75  | 1. 24E-73  | 158. 3785 |
| MLPH         | 3. 317951 | 5. 178897 | 28. 94881 | 4. 70E-91  | 1. 26E-89  | 195. 8792 |
| LRRFIP1      | 2. 320905 | 4. 67463  | 30. 56884 | 1. 39E-96  | 4. 86E-95  | 208. 6365 |
| PER2         | 1. 062666 | 2. 314551 | 12. 64116 | 6. 05E-30  | 2. 98E-29  | 55. 11916 |
| TRAF3IP1     | 1. 389443 | 2. 272613 | 27. 85672 | 3. 02E-87  | 6. 74E-86  | 187. 0953 |
| ASB1         | 1. 618179 | 2. 984224 | 28. 99971 | 3. 14E-91  | 8. 50E-90  | 196. 2851 |
| TWIST2       | 1. 015374 | 1. 263004 | 14. 61228 | 2. 46E-37  | 1. 41E-36  | 72. 10032 |
| MYEOV2       | 1. 487525 | 6. 464689 | 22. 42703 | 2. 04E-67  | 2. 35E-66  | 141. 3671 |
| GPC1         | 1. 944683 | 4. 276834 | 21. 88771 | 2. 25E-65  | 2. 45E-64  | 136. 661  |
| RNPEPL1      | 1. 259685 | 5. 706799 | 16. 29283 | 8. 54E-44  | 5. 57E-43  | 86. 9572  |
| GPR35        | 3. 635546 | 2. 470022 | 38. 82642 | 1. 40E-122 | 2. 35E-120 | 268. 6235 |
| AQP12B       | -6. 09867 | 4. 25563  | -42. 45   | 6. 76E-133 | 2. 45E-130 | 292. 4351 |
| AC011298. 2  | -3. 57889 | 2. 27176  | -41. 8688 | 2. 77E-131 | 8. 78E-129 | 288. 7121 |
| AQP12A       | -5. 01067 | 3. 699804 | -36. 0166 | 3. 90E-114 | 3. 85E-112 | 249. 1366 |
| KIF1A        | -2. 16191 | 2. 986216 | -21. 74   | 8. 19E-65  | 8. 76E-64  | 135. 3677 |
| C2orf54      | 2. 384095 | 1. 521621 | 25. 75341 | 9. 81E-80  | 1. 66E-78  | 169. 771  |
| PPP1R7       | 1. 49119  | 5. 325236 | 23. 67308 | 4. 34E-72  | 5. 72E-71  | 152. 1397 |
| ANO7         | 1. 114112 | 1. 237242 | 9. 32127  | 2. 01E-18  | 7. 73E-18  | 28. 72413 |
| FARP2        | 1. 411821 | 3. 420081 | 22. 35458 | 3. 84E-67  | 4. 38E-66  | 140. 7364 |
| BOK          | 1. 442354 | 3. 926468 | 20. 35999 | 1. 55E-59  | 1. 43E-58  | 123. 2093 |
| THAP4        | 1. 648838 | 4. 875324 | 27. 36368 | 1. 66E-85  | 3. 45E-84  | 183. 0817 |
| DTYMK        | 1. 944421 | 3. 433125 | 32. 62395 | 2. 15E-103 | 1. 10E-101 | 224. 3468 |
| AC114730. 11 | -1. 05666 | 1. 229797 | -19. 1035 | 1. 09E-54  | 9. 00E-54  | 112. 0425 |
| LINC01237    | -2. 16377 | 1. 670156 | -29. 6063 | 2. 57E-93  | 7. 68E-92  | 201. 0965 |
| AC131097. 4  | -2. 90693 | 2. 256742 | -27. 6865 | 1. 20E-86  | 2. 62E-85  | 185. 7129 |
| AC093642. 3  | -2. 71183 | 2. 34555  | -29. 2748 | 3. 53E-92  | 9. 97E-91  | 198. 4728 |

|            |          |          |          |           |           |          |
|------------|----------|----------|----------|-----------|-----------|----------|
| AC093642.1 | -1.43687 | 0.913279 | -26.3034 | 1.01E-81  | 1.84E-80  | 174.3518 |
| TRNT1      | 1.049413 | 2.754227 | 21.35665 | 2.36E-63  | 2.43E-62  | 132.0038 |
| SUMF1      | 1.84427  | 3.834394 | 30.10225 | 5.25E-95  | 1.70E-93  | 204.9959 |
| LRRN1      | 1.957446 | 1.731363 | 21.67233 | 1.48E-64  | 1.57E-63  | 134.7749 |
| ITPR1      | 1.123299 | 2.106862 | 15.79557 | 7.11E-42  | 4.45E-41  | 82.53859 |
| AC018816.3 | 1.580552 | 1.016767 | 27.2187  | 5.42E-85  | 1.11E-83  | 181.8959 |
| BHLHE40    | 2.8049   | 5.736015 | 22.2679  | 8.16E-67  | 9.21E-66  | 139.9812 |
| ARL8B      | 1.547276 | 4.339809 | 26.06824 | 7.12E-81  | 1.25E-79  | 172.3974 |
| LMCD1      | 2.704418 | 4.430519 | 30.08498 | 6.01E-95  | 1.94E-93  | 204.8606 |
| OXTR       | 1.063229 | 0.613812 | 18.09703 | 8.64E-51  | 6.51E-50  | 103.0597 |
| RAD18      | 1.168222 | 1.327193 | 27.45671 | 7.78E-86  | 1.64E-84  | 183.8413 |
| THUMPD3    | 1.419132 | 3.723313 | 26.586   | 9.79E-83  | 1.84E-81  | 176.6916 |
| MTMR14     | 1.786503 | 3.716857 | 32.96145 | 1.73E-104 | 9.32E-103 | 226.8765 |
| CAMK1      | 1.495462 | 2.987321 | 22.99756 | 1.46E-69  | 1.78E-68  | 146.3178 |
| TADA3      | 1.819122 | 4.619903 | 29.5267  | 4.82E-93  | 1.42E-91  | 200.4676 |
| ARPC4      | 2.270977 | 5.827754 | 31.99851 | 2.41E-101 | 1.08E-99  | 219.6216 |
| CIDEC      | 1.789037 | 1.748942 | 12.9302  | 5.20E-31  | 2.62E-30  | 57.56589 |
| IL17RE     | 1.201679 | 3.251318 | 13.94577 | 8.30E-35  | 4.50E-34  | 66.28857 |
| EMC3       | 1.790776 | 4.927905 | 28.68303 | 3.92E-90  | 1.00E-88  | 193.7551 |
| CIDCEP     | 1.543102 | 2.70286  | 31.24128 | 7.75E-99  | 3.04E-97  | 213.8352 |
| FANCD2     | 1.500945 | 1.840259 | 24.80477 | 2.84E-76  | 4.31E-75  | 161.7893 |
| BRK1       | 1.79236  | 6.244848 | 26.59774 | 8.89E-83  | 1.68E-81  | 176.7885 |
| VHL        | 1.151916 | 3.257902 | 19.14924 | 7.23E-55  | 6.01E-54  | 112.4506 |
| IRAK2      | 2.268688 | 1.843808 | 30.33879 | 8.30E-96  | 2.79E-94  | 206.8449 |
| SEC13      | 1.375259 | 5.805788 | 21.99076 | 9.15E-66  | 1.00E-64  | 137.5621 |
| HRH1       | 2.513809 | 1.37464  | 43.88606 | 8.12E-137 | 3.96E-134 | 301.483  |
| ATG7       | 1.736139 | 3.116887 | 33.90145 | 1.64E-107 | 1.06E-105 | 233.8473 |
| VGLL4      | 2.016764 | 4.304222 | 28.35567 | 5.40E-89  | 1.30E-87  | 191.1267 |
| PPARG      | 3.637888 | 2.761762 | 38.8207  | 1.46E-122 | 2.43E-120 | 268.5847 |
| TMEM40     | 1.243105 | 0.696757 | 12.71324 | 3.29E-30  | 1.63E-29  | 55.72762 |
| IQSEC1     | 1.006261 | 3.438192 | 17.20543 | 2.49E-47  | 1.75E-46  | 95.09457 |
| FBLN2      | 3.263706 | 3.279768 | 30.34406 | 7.97E-96  | 2.68E-94  | 206.886  |
| WNT7A      | 2.106905 | 1.037703 | 20.5556  | 2.74E-60  | 2.60E-59  | 124.9404 |
| CHCHD4     | 1.126071 | 2.759931 | 25.519   | 6.96E-79  | 1.15E-77  | 167.8081 |
| TMEM43     | 2.096144 | 4.418847 | 29.10849 | 1.32E-91  | 3.64E-90  | 197.1513 |
| LSM3       | 1.303269 | 2.706266 | 30.83856 | 1.72E-97  | 6.32E-96  | 210.7286 |
| SLC6A6     | 3.326762 | 2.869966 | 39.37758 | 3.44E-124 | 6.20E-122 | 272.3389 |
| FGD5       | 2.464382 | 2.389117 | 34.46407 | 2.69E-109 | 1.95E-107 | 237.9675 |
| FGD5-AS1   | 1.496713 | 4.487379 | 21.44385 | 1.10E-63  | 1.14E-62  | 132.7701 |
| SH3BP5     | 2.239748 | 2.908566 | 25.68005 | 1.81E-79  | 3.05E-78  | 169.1574 |
| METTL6     | 1.384399 | 2.464576 | 30.96021 | 6.73E-98  | 2.52E-96  | 211.6691 |
| EAF1       | 1.541045 | 2.530223 | 31.47681 | 1.28E-99  | 5.21E-98  | 215.6427 |
| DPH3       | 1.696837 | 2.553276 | 34.64842 | 7.07E-110 | 5.28E-108 | 239.3091 |
| OXNAD1     | 1.325071 | 2.113839 | 32.56837 | 3.27E-103 | 1.64E-101 | 223.9289 |
| RFTN1      | 2.966943 | 2.856287 | 38.10612 | 1.88E-120 | 2.71E-118 | 263.7157 |
| TBC1D5     | 1.193697 | 2.701703 | 18.67732 | 4.86E-53  | 3.86E-52  | 108.2417 |
| RAB5A      | 1.690036 | 4.036891 | 27.68295 | 1.24E-86  | 2.69E-85  | 185.6841 |
| SGOL1      | 1.211784 | 0.682378 | 30.76011 | 3.16E-97  | 1.14E-95  | 210.121  |
| ZNF385D    | 1.021633 | 0.984549 | 12.93537 | 4.98E-31  | 2.51E-30  | 57.60976 |
| HMGB1P5    | 2.081722 | 4.587574 | 26.56646 | 1.15E-82  | 2.16E-81  | 176.5301 |
| UBE2E2     | 1.827159 | 3.343471 | 22.72748 | 1.51E-68  | 1.79E-67  | 143.9779 |
| UBE2E1     | 1.824183 | 4.766984 | 30.00685 | 1.11E-94  | 3.54E-93  | 204.2482 |
| NR1D2      | 1.008594 | 2.756691 | 15.25942 | 8.22E-40  | 4.94E-39  | 77.79332 |
| RARB       | 1.697365 | 1.348883 | 29.3513  | 1.93E-92  | 5.49E-91  | 199.0793 |

|            |          |          |          |           |           |          |
|------------|----------|----------|----------|-----------|-----------|----------|
| TOP2B      | 1.344269 | 4.845631 | 23.37496 | 5.62E-71  | 7.16E-70  | 149.5759 |
| SLC4A7     | 1.373379 | 1.689916 | 21.45263 | 1.02E-63  | 1.06E-62  | 132.8472 |
| AC098614.2 | 1.353919 | 0.969903 | 26.91042 | 6.78E-84  | 1.33E-82  | 179.3661 |
| CMC1       | 1.32726  | 4.185699 | 23.25904 | 1.52E-70  | 1.92E-69  | 148.5766 |
| TGFBR2     | 1.834158 | 4.860356 | 21.42195 | 1.33E-63  | 1.38E-62  | 132.5776 |
| STT3B      | 1.284327 | 4.939619 | 19.9755  | 4.67E-58  | 4.17E-57  | 119.8003 |
| OSBPL10    | 2.671354 | 1.956385 | 37.92353 | 6.55E-120 | 9.05E-118 | 262.4621 |
| ZNF860     | 1.002576 | 0.56874  | 24.7669  | 3.91E-76  | 5.90E-75  | 161.4687 |
| CMTM7      | 2.55369  | 4.468848 | 30.51204 | 2.16E-96  | 7.46E-95  | 208.1948 |
| CMTM6      | 2.59161  | 4.085919 | 36.08576 | 2.39E-114 | 2.40E-112 | 249.6277 |
| DYNC1LI1   | 1.475681 | 3.248345 | 29.50514 | 5.72E-93  | 1.67E-91  | 200.2972 |
| CNOT10     | 1.03845  | 3.459544 | 19.98588 | 4.25E-58  | 3.80E-57  | 119.8924 |
| GLB1       | 1.718945 | 4.368836 | 28.31154 | 7.70E-89  | 1.85E-87  | 190.7714 |
| CRTAP      | 2.288754 | 5.453396 | 28.6841  | 3.89E-90  | 9.97E-89  | 193.7636 |
| FBXL2      | 1.237688 | 2.039129 | 19.04999 | 1.75E-54  | 1.44E-53  | 111.5659 |
| PDCD6IP    | 1.457914 | 5.279389 | 18.35146 | 8.91E-52  | 6.87E-51  | 105.3323 |
| STAC       | 1.059775 | 0.634304 | 17.10076 | 6.34E-47  | 4.42E-46  | 94.16001 |
| TRANK1     | 1.612872 | 1.828373 | 24.8501  | 1.93E-76  | 2.95E-75  | 162.173  |
| MLH1       | 1.031231 | 3.466305 | 19.46417 | 4.38E-56  | 3.74E-55  | 115.2552 |
| LRRFIP2    | 1.104922 | 3.999324 | 19.09812 | 1.14E-54  | 9.43E-54  | 111.9949 |
| TCEA1P2    | 1.387804 | 1.226279 | 19.47629 | 3.93E-56  | 3.37E-55  | 115.3631 |
| ITGA9      | 1.431138 | 1.23312  | 22.96633 | 1.91E-69  | 2.32E-68  | 146.0476 |
| ITGA9-AS1  | 1.301464 | 1.70664  | 23.13333 | 4.51E-70  | 5.60E-69  | 147.4915 |
| CTDSPL     | 2.120047 | 3.532008 | 30.85393 | 1.53E-97  | 5.62E-96  | 210.8475 |
| VILL       | 4.400114 | 3.486529 | 40.92567 | 1.24E-128 | 3.10E-126 | 282.5932 |
| PLCD1      | 1.116391 | 3.085783 | 19.38468 | 8.89E-56  | 7.53E-55  | 114.5477 |
| MYD88      | 2.354888 | 3.962719 | 33.2584  | 1.89E-105 | 1.08E-103 | 229.0904 |
| OXSRI      | 1.509105 | 3.20131  | 25.04171 | 3.84E-77  | 5.98E-76  | 163.7923 |
| CSRNP1     | 1.134538 | 3.785863 | 11.02039 | 3.95E-24  | 1.72E-23  | 41.78277 |
| EIF1B      | 1.190215 | 5.049222 | 17.7207  | 2.49E-49  | 1.82E-48  | 99.69733 |
| CTNNB1     | 2.38689  | 6.015935 | 31.89381 | 5.32E-101 | 2.34E-99  | 218.8258 |
| TRAK1      | 2.61651  | 3.689077 | 36.49463 | 1.33E-115 | 1.44E-113 | 252.5176 |
| CCK        | 1.700948 | 1.006782 | 13.53673 | 2.87E-33  | 1.51E-32  | 62.75371 |
| VIPR1      | 1.116202 | 1.92106  | 12.66592 | 4.91E-30  | 2.42E-29  | 55.32804 |
| SS18L2     | 1.54134  | 3.851674 | 27.86069 | 2.93E-87  | 6.53E-86  | 187.1275 |
| HIGD1A     | 2.102094 | 5.134736 | 28.81127 | 1.41E-90  | 3.69E-89  | 194.7811 |
| FAM198A    | 1.035845 | 1.532282 | 13.42154 | 7.74E-33  | 4.05E-32  | 61.76326 |
| ANO10      | 1.555069 | 3.31989  | 29.53185 | 4.63E-93  | 1.36E-91  | 200.5083 |
| TCAIM      | 1.465356 | 2.876968 | 28.28743 | 9.35E-89  | 2.23E-87  | 190.5772 |
| KIAA1143   | 1.48814  | 2.709428 | 26.82245 | 1.40E-83  | 2.71E-82  | 178.6421 |
| KIF15      | 1.387618 | 0.869042 | 31.95749 | 3.28E-101 | 1.45E-99  | 219.31   |
| TMEM42     | 1.148044 | 3.3493   | 19.58148 | 1.54E-56  | 1.33E-55  | 116.299  |
| ZDHHC3     | 2.219179 | 4.338597 | 33.13179 | 4.85E-105 | 2.72E-103 | 228.1478 |
| EXOSC7     | 1.685239 | 4.283283 | 29.15634 | 9.04E-92  | 2.51E-90  | 197.5318 |
| CLEC3B     | 1.308225 | 2.997217 | 13.24126 | 3.64E-32  | 1.88E-31  | 60.21789 |
| CDCP1      | 2.677789 | 3.177878 | 33.02309 | 1.09E-104 | 6.00E-103 | 227.3369 |
| RPS24P8    | 1.040484 | 0.917371 | 23.65382 | 5.12E-72  | 6.71E-71  | 151.9744 |
| TMEM158    | 2.63998  | 2.015702 | 28.1401  | 3.06E-88  | 7.12E-87  | 189.3887 |
| LARS2      | 1.121194 | 2.122706 | 24.35147 | 1.32E-74  | 1.90E-73  | 157.9404 |
| SLC6A20    | 1.843812 | 2.22454  | 17.54701 | 1.18E-48  | 8.48E-48  | 98.14554 |
| FYCO1      | 1.074079 | 2.861038 | 19.51104 | 2.89E-56  | 2.48E-55  | 115.6723 |
| CXCR6      | 1.346116 | 1.036303 | 18.52344 | 1.92E-52  | 1.50E-51  | 106.8681 |
| CCR1       | 1.64358  | 1.342596 | 22.0789  | 4.24E-66  | 4.69E-65  | 138.3321 |
| CCR2       | 1.012704 | 0.924403 | 13.53714 | 2.86E-33  | 1.51E-32  | 62.75721 |

|          |           |           |           |            |            |           |
|----------|-----------|-----------|-----------|------------|------------|-----------|
| CCR5     | 1. 306538 | 1. 043172 | 11. 39238 | 1. 95E-25  | 8. 71E-25  | 44. 77871 |
| CCRL2    | 2. 168797 | 1. 697925 | 34. 99989 | 5. 57E-111 | 4. 47E-109 | 241. 8553 |
| LTF      | 1. 569642 | 3. 66574  | 9. 50469  | 5. 14E-19  | 2. 00E-18  | 30. 07802 |
| ALS2CL   | 1. 096906 | 4. 164415 | 10. 93437 | 7. 87E-24  | 3. 41E-23  | 41. 09626 |
| CCDC12   | 1. 970979 | 5. 041421 | 31. 23729 | 7. 99E-99  | 3. 13E-97  | 213. 8045 |
| KIF9     | 1. 178523 | 3. 112991 | 19. 64941 | 8. 44E-57  | 7. 34E-56  | 116. 9032 |
| KLHL18   | 1. 159032 | 2. 339715 | 24. 47825 | 4. 51E-75  | 6. 58E-74  | 159. 0191 |
| ELP6     | 1. 243099 | 3. 697458 | 24. 73043 | 5. 32E-76  | 8. 00E-75  | 161. 1596 |
| SMARCC1  | 1. 119358 | 3. 600568 | 18. 89247 | 7. 13E-54  | 5. 77E-53  | 110. 1612 |
| DHX30    | 1. 059365 | 4. 314087 | 18. 40487 | 5. 53E-52  | 4. 29E-51  | 105. 8094 |
| MAP4     | 1. 516397 | 5. 473726 | 21. 72119 | 9. 66E-65  | 1. 03E-63  | 135. 2031 |
| FBXW12   | -1. 62362 | 1. 011603 | -31. 2831 | 5. 62E-99  | 2. 22E-97  | 214. 1563 |
| CCDC51   | 2. 035626 | 2. 512234 | 42. 39672 | 9. 48E-133 | 3. 42E-130 | 292. 0952 |
| TMA7     | 1. 51291  | 7. 155726 | 20. 36751 | 1. 45E-59  | 1. 34E-58  | 123. 2759 |
| TREX1    | 1. 352024 | 4. 06772  | 19. 7109  | 4. 89E-57  | 4. 27E-56  | 117. 4498 |
| SHISA5   | 2. 487915 | 5. 803531 | 32. 92578 | 2. 25E-104 | 1. 21E-102 | 226. 6098 |
| COL7A1   | 3. 5777   | 2. 656869 | 28. 37876 | 4. 49E-89  | 1. 09E-87  | 191. 3125 |
| UQCRC1   | 1. 618064 | 6. 432255 | 24. 68353 | 7. 91E-76  | 1. 18E-74  | 160. 762  |
| CELSR3   | 1. 133157 | 1. 348227 | 15. 4143  | 2. 09E-40  | 1. 27E-39  | 79. 16173 |
| NCKIPSD  | 1. 325715 | 3. 225489 | 22. 14178 | 2. 45E-66  | 2. 73E-65  | 138. 8811 |
| NDUFAF3  | 1. 652556 | 5. 476119 | 18. 82868 | 1. 26E-53  | 1. 01E-52  | 109. 5922 |
| QARS     | 1. 167363 | 6. 435375 | 16. 05291 | 7. 23E-43  | 4. 62E-42  | 84. 82348 |
| LAMB2    | 1. 348536 | 6. 902696 | 17. 78068 | 1. 46E-49  | 1. 07E-48  | 100. 2332 |
| CCDC71   | 1. 651892 | 2. 950339 | 34. 09164 | 4. 08E-108 | 2. 73E-106 | 235. 2445 |
| KLHDC8B  | 1. 278104 | 3. 61893  | 19. 20936 | 4. 23E-55  | 3. 53E-54  | 112. 9862 |
| USP4     | 1. 364597 | 4. 036279 | 23. 10934 | 5. 54E-70  | 6. 87E-69  | 147. 2842 |
| GPX1     | 3. 111853 | 6. 888466 | 36. 05479 | 2. 97E-114 | 2. 97E-112 | 249. 4079 |
| RHOA     | 2. 284813 | 7. 224514 | 29. 0331  | 2. 40E-91  | 6. 54E-90  | 196. 5511 |
| TCTA     | 1. 086129 | 3. 889616 | 17. 48246 | 2. 10E-48  | 1. 50E-47  | 97. 56889 |
| DAG1     | 1. 263039 | 4. 821551 | 17. 27334 | 1. 36E-47  | 9. 58E-47  | 95. 70098 |
| APEH     | 1. 358258 | 5. 532399 | 21. 02926 | 4. 20E-62  | 4. 17E-61  | 129. 1223 |
| RNF123   | 1. 136632 | 3. 388342 | 21. 81923 | 4. 10E-65  | 4. 42E-64  | 136. 0617 |
| FAM212A  | 1. 194368 | 1. 163424 | 23. 99368 | 2. 79E-73  | 3. 84E-72  | 154. 887  |
| MST1R    | 3. 621368 | 3. 86975  | 35. 62452 | 6. 32E-113 | 5. 72E-111 | 246. 3436 |
| SEMA3F   | 1. 973169 | 2. 734927 | 26. 01178 | 1. 14E-80  | 1. 99E-79  | 171. 9273 |
| SLC38A3  | -2. 61046 | 2. 935651 | -22. 9474 | 2. 25E-69  | 2. 73E-68  | 145. 8834 |
| GNAI2    | 2. 865847 | 6. 134066 | 36. 51109 | 1. 19E-115 | 1. 29E-113 | 252. 6335 |
| HYAL3    | 1. 020682 | 1. 248984 | 20. 8307  | 2. 42E-61  | 2. 36E-60  | 127. 371  |
| HYAL1    | 1. 527095 | 2. 878763 | 14. 16185 | 1. 26E-35  | 6. 97E-35  | 68. 1661  |
| HYAL2    | 2. 271431 | 4. 494955 | 31. 6666  | 3. 00E-100 | 1. 27E-98  | 217. 0941 |
| CYB561D2 | 1. 277345 | 3. 681669 | 21. 80826 | 4. 51E-65  | 4. 86E-64  | 135. 9657 |
| TMEM115  | 1. 408163 | 4. 243447 | 25. 99186 | 1. 34E-80  | 2. 35E-79  | 171. 7613 |
| MANF     | 1. 065417 | 6. 422643 | 13. 13282 | 9. 22E-32  | 4. 72E-31  | 59. 29122 |
| VPRBP    | 1. 031767 | 2. 762009 | 20. 61747 | 1. 59E-60  | 1. 51E-59  | 125. 4874 |
| TEX264   | 1. 800997 | 5. 02182  | 30. 97887 | 5. 83E-98  | 2. 19E-96  | 211. 8132 |
| RRP9     | 1. 666242 | 3. 409018 | 30. 39285 | 5. 45E-96  | 1. 85E-94  | 207. 2665 |
| PARP3    | 2. 314903 | 3. 044914 | 31. 36864 | 2. 92E-99  | 1. 17E-97  | 214. 8135 |
| PCBP4    | 1. 310174 | 3. 871703 | 19. 60428 | 1. 26E-56  | 1. 09E-55  | 116. 5018 |
| ABHD14B  | 1. 128141 | 5. 230656 | 17. 17282 | 3. 33E-47  | 2. 33E-46  | 94. 80338 |
| ABHD14A  | 1. 167202 | 3. 696644 | 19. 5855  | 1. 49E-56  | 1. 29E-55  | 116. 3347 |
| ACY1     | 2. 398327 | 4. 154288 | 32. 39802 | 1. 18E-102 | 5. 68E-101 | 222. 6456 |
| DUSP7    | 2. 164312 | 2. 798972 | 32. 86625 | 3. 51E-104 | 1. 86E-102 | 226. 1643 |
| POC1A    | 2. 052791 | 1. 41233  | 40. 20214 | 1. 43E-126 | 3. 03E-124 | 277. 8337 |
| ALAS1    | 2. 408077 | 3. 983563 | 39. 03262 | 3. 49E-123 | 5. 93E-121 | 270. 0175 |

|              |           |           |           |            |            |           |
|--------------|-----------|-----------|-----------|------------|------------|-----------|
| TWF2         | 2. 930245 | 4. 291485 | 41. 91448 | 2. 07E-131 | 6. 62E-129 | 289. 0058 |
| PPM1M        | 1. 514441 | 3. 242133 | 23. 63896 | 5. 82E-72  | 7. 61E-71  | 151. 8468 |
| WDR82        | 1. 813899 | 4. 050157 | 28. 15314 | 2. 76E-88  | 6. 43E-87  | 189. 494  |
| TNNC1        | 1. 60898  | 2. 122171 | 16. 52299 | 1. 10E-44  | 7. 29E-44  | 89. 00662 |
| STAB1        | 1. 059749 | 4. 513326 | 10. 48442 | 2. 79E-22  | 1. 17E-21  | 37. 54604 |
| NT5DC2       | 2. 436641 | 4. 243541 | 30. 81064 | 2. 13E-97  | 7. 80E-96  | 210. 5124 |
| SMIM4        | 1. 713652 | 4. 085461 | 23. 92672 | 4. 95E-73  | 6. 72E-72  | 154. 3141 |
| GLT8D1       | 1. 170303 | 5. 079061 | 18. 47148 | 3. 05E-52  | 2. 38E-51  | 106. 4041 |
| ITIH3        | 1. 55457  | 1. 358351 | 21. 3416  | 2. 69E-63  | 2. 76E-62  | 131. 8716 |
| ITIH4        | -1. 79973 | 4. 068518 | -11. 5592 | 4. 98E-26  | 2. 26E-25  | 46. 13549 |
| RP5-966M1. 6 | -1. 65974 | 1. 563716 | -22. 2989 | 6. 23E-67  | 7. 06E-66  | 140. 2515 |
| PRKCD        | 1. 961907 | 4. 134844 | 27. 50077 | 5. 43E-86  | 1. 15E-84  | 184. 2007 |
| DCP1A        | 1. 014679 | 2. 287983 | 19. 74219 | 3. 70E-57  | 3. 24E-56  | 117. 728  |
| ACTR8        | 1. 091899 | 3. 185182 | 22. 18419 | 1. 69E-66  | 1. 90E-65  | 139. 2512 |
| WNT5A        | 1. 493226 | 2. 109922 | 17. 38373 | 5. 06E-48  | 3. 60E-47  | 96. 68699 |
| PDE12        | 1. 064577 | 1. 988224 | 20. 67179 | 9. 82E-61  | 9. 42E-60  | 125. 9675 |
| ARF4         | 1. 853161 | 6. 613327 | 23. 70959 | 3. 18E-72  | 4. 20E-71  | 152. 4532 |
| DENND6A      | 1. 383032 | 2. 308863 | 28. 37515 | 4. 62E-89  | 1. 12E-87  | 191. 2835 |
| SLMAP        | 1. 92632  | 3. 56698  | 28. 35854 | 5. 28E-89  | 1. 27E-87  | 191. 1498 |
| FLNB         | 2. 277144 | 6. 387864 | 22. 29225 | 6. 60E-67  | 7. 47E-66  | 140. 1934 |
| ABHD6        | 1. 339328 | 1. 647002 | 26. 75961 | 2. 34E-83  | 4. 51E-82  | 178. 1244 |
| PDHB         | 1. 437091 | 4. 601034 | 24. 65265 | 1. 03E-75  | 1. 53E-74  | 160. 5002 |
| FAM3D        | 4. 307732 | 2. 478863 | 27. 56247 | 3. 29E-86  | 7. 03E-85  | 184. 7036 |
| PTPRG        | 1. 501305 | 2. 121251 | 22. 81677 | 6. 95E-69  | 8. 34E-68  | 144. 7523 |
| C3orf14      | 1. 143168 | 3. 034731 | 16. 00753 | 1. 08E-42  | 6. 89E-42  | 84. 42031 |
| THOC7        | 1. 308591 | 5. 117156 | 21. 53072 | 5. 12E-64  | 5. 36E-63  | 133. 5328 |
| PSMD6        | -1. 11216 | 6. 108467 | -13. 6252 | 1. 34E-33  | 7. 09E-33  | 63. 51568 |
| ADAMTS9      | 1. 206966 | 3. 015948 | 14. 30206 | 3. 72E-36  | 2. 07E-35  | 69. 38797 |
| SLC25A26     | 1. 205434 | 3. 696787 | 22. 86163 | 4. 72E-69  | 5. 69E-68  | 145. 141  |
| SUCLG2       | 1. 634957 | 4. 316934 | 26. 92441 | 6. 04E-84  | 1. 19E-82  | 179. 4812 |
| PSMC1P1      | 2. 295964 | 3. 137362 | 32. 52304 | 4. 60E-103 | 2. 29E-101 | 223. 5878 |
| UBA3         | 1. 496566 | 3. 890577 | 24. 68841 | 7. 59E-76  | 1. 13E-74  | 160. 8034 |
| ARL6IP5      | 2. 40694  | 5. 297494 | 33. 34471 | 9. 99E-106 | 5. 83E-104 | 229. 7318 |
| FRMD4B       | 1. 77832  | 2. 582576 | 25. 84189 | 4. 69E-80  | 8. 04E-79  | 170. 5103 |
| MITF         | 1. 519214 | 1. 89545  | 22. 87328 | 4. 26E-69  | 5. 15E-68  | 145. 2419 |
| FOXP1        | 1. 616939 | 3. 408404 | 28. 04062 | 6. 83E-88  | 1. 56E-86  | 188. 5847 |
| RYBP         | 1. 7393   | 2. 245241 | 33. 06124 | 8. 21E-105 | 4. 53E-103 | 227. 6216 |
| GXYLT2       | 1. 394504 | 1. 427841 | 19. 02747 | 2. 14E-54  | 1. 76E-53  | 111. 3651 |
| FTHIP23      | 1. 185885 | 1. 215211 | 24. 76532 | 3. 96E-76  | 5. 97E-75  | 161. 4553 |
| PPP4R2       | 1. 415089 | 3. 125795 | 23. 07875 | 7. 22E-70  | 8. 92E-69  | 147. 0199 |
| PDZRN3       | 1. 468371 | 2. 425024 | 19. 03894 | 1. 93E-54  | 1. 59E-53  | 111. 4674 |
| HNRNPA3P6    | 1. 772688 | 1. 75725  | 32. 18198 | 6. 00E-102 | 2. 79E-100 | 221. 0128 |
| RPL23AP49    | -1. 04158 | 1. 654322 | -16. 9602 | 2. 22E-46  | 1. 53E-45  | 92. 90548 |
| ROBO1        | 2. 309393 | 1. 983564 | 28. 21935 | 1. 62E-88  | 3. 81E-87  | 190. 0283 |
| GBE1         | 1. 14337  | 2. 937146 | 16. 69541 | 2. 36E-45  | 1. 59E-44  | 90. 54339 |
| CHMP2B       | 1. 674902 | 4. 217353 | 25. 01935 | 4. 63E-77  | 7. 19E-76  | 163. 6035 |
| CGGBP1       | 1. 012268 | 4. 056424 | 15. 70911 | 1. 53E-41  | 9. 52E-41  | 81. 77193 |
| C3orf38      | 1. 617569 | 2. 306198 | 33. 68896 | 7. 85E-107 | 4. 89E-105 | 232. 281  |
| EPHA3        | 1. 824089 | 1. 484955 | 20. 94751 | 8. 63E-62  | 8. 50E-61  | 128. 4016 |
| PROS1        | 2. 451302 | 2. 834846 | 31. 77126 | 1. 35E-100 | 5. 83E-99  | 217. 8926 |
| ARL13B       | 1. 301306 | 1. 647673 | 24. 83765 | 2. 15E-76  | 3. 28E-75  | 162. 0676 |
| CLDND1       | 1. 47488  | 4. 54318  | 21. 67817 | 1. 41E-64  | 1. 50E-63  | 134. 8261 |
| CPOX         | 1. 074581 | 2. 684429 | 20. 35098 | 1. 67E-59  | 1. 55E-58  | 123. 1295 |
| DCBLD2       | 2. 347659 | 2. 813518 | 23. 55344 | 1. 21E-71  | 1. 57E-70  | 151. 1119 |

|             |          |          |          |           |           |          |
|-------------|----------|----------|----------|-----------|-----------|----------|
| COL8A1      | 4.306957 | 2.559055 | 38.63823 | 5.01E-122 | 8.02E-120 | 267.347  |
| FILIP1L     | 1.770072 | 3.601187 | 19.15422 | 6.92E-55  | 5.75E-54  | 112.4949 |
| NIT2        | 1.32517  | 4.487879 | 22.35163 | 3.94E-67  | 4.50E-66  | 140.7107 |
| TMEM45A     | 1.857091 | 3.833286 | 18.93251 | 4.99E-54  | 4.05E-53  | 110.5184 |
| TFG         | 1.507058 | 5.441455 | 23.05529 | 8.84E-70  | 1.09E-68  | 146.8171 |
| ABI3BP      | 1.903513 | 2.819518 | 17.36409 | 6.03E-48  | 4.28E-47  | 96.51157 |
| TRMT10C     | 1.703204 | 2.857328 | 34.43831 | 3.25E-109 | 2.34E-107 | 237.7797 |
| PCNP        | 1.27094  | 5.208431 | 17.71533 | 2.62E-49  | 1.91E-48  | 99.64937 |
| NXPE3       | 1.167237 | 1.418082 | 19.01072 | 2.48E-54  | 2.03E-53  | 111.2158 |
| ALCAM       | 1.109704 | 4.034097 | 13.70118 | 6.92E-34  | 3.69E-33  | 64.17162 |
| CBLB        | 1.737608 | 2.976457 | 28.53272 | 1.30E-89  | 3.25E-88  | 192.5499 |
| LINC00883   | 1.020429 | 0.983295 | 21.59573 | 2.90E-64  | 3.05E-63  | 134.1032 |
| BBX         | 1.668405 | 2.703606 | 24.77973 | 3.51E-76  | 5.30E-75  | 161.5773 |
| CD47        | 2.508588 | 5.267106 | 31.52902 | 8.56E-100 | 3.53E-98  | 216.0425 |
| IFT57       | 1.322364 | 4.101325 | 20.10097 | 1.53E-58  | 1.39E-57  | 120.9136 |
| HHLA2       | 2.479213 | 1.72964  | 22.49542 | 1.13E-67  | 1.31E-66  | 141.9622 |
| KIAA1524    | 1.421184 | 1.013193 | 29.7178  | 1.07E-93  | 3.25E-92  | 201.9757 |
| GUCA1C      | -3.14359 | 2.076757 | -30.207  | 2.32E-95  | 7.64E-94  | 205.8158 |
| PVRL3       | 1.540807 | 1.971244 | 21.36325 | 2.23E-63  | 2.29E-62  | 132.0618 |
| CD96        | 1.741056 | 1.132318 | 23.10361 | 5.83E-70  | 7.22E-69  | 147.2347 |
| ZBED2       | 1.589242 | 0.774962 | 17.32249 | 8.75E-48  | 6.19E-47  | 96.13994 |
| P11-757F18. | -1.08634 | 1.96335  | -16.2891 | 8.84E-44  | 5.76E-43  | 86.92356 |
| CD200       | 1.677766 | 2.315696 | 19.76288 | 3.08E-57  | 2.70E-56  | 117.9118 |
| ATG3        | 1.226417 | 4.459554 | 22.72584 | 1.53E-68  | 1.82E-67  | 143.9637 |
| SLC35A5     | 1.555681 | 3.223388 | 24.9088  | 1.18E-76  | 1.81E-75  | 162.6695 |
| CCDC80      | 3.321066 | 5.038241 | 23.55888 | 1.16E-71  | 1.50E-70  | 151.1586 |
| BOC         | 1.176964 | 3.236467 | 12.06702 | 7.50E-28  | 3.54E-27  | 50.31521 |
| SIDT1       | 1.453441 | 1.244949 | 21.997   | 8.66E-66  | 9.51E-65  | 137.6166 |
| NAA50       | 1.976832 | 4.657588 | 29.0437  | 2.21E-91  | 6.02E-90  | 196.6355 |
| ATP6V1A     | 1.610888 | 3.393627 | 29.07517 | 1.72E-91  | 4.72E-90  | 196.8861 |
| QTRTD1      | 1.057838 | 2.483156 | 20.31077 | 2.39E-59  | 2.20E-58  | 122.7733 |
| TIGIT       | 1.383644 | 0.755789 | 19.69262 | 5.75E-57  | 5.01E-56  | 117.2874 |
| GAP43       | 1.554306 | 1.052874 | 19.78021 | 2.64E-57  | 2.32E-56  | 118.0658 |
| LSAMP       | 1.400144 | 1.416132 | 17.6514  | 4.63E-49  | 3.37E-48  | 99.07817 |
| BZW1P2      | 2.230306 | 2.317131 | 24.03935 | 1.89E-73  | 2.61E-72  | 155.2774 |
| UPK1B       | 1.22924  | 1.737695 | 7.728577 | 1.44E-13  | 4.93E-13  | 17.65557 |
| B4GALT4     | 2.268934 | 4.065051 | 33.57859 | 1.77E-106 | 1.07E-104 | 231.4654 |
| ARHGAP31    | 1.423872 | 1.480863 | 25.21699 | 8.78E-78  | 1.40E-76  | 165.2701 |
| TIMMDC1     | 1.754949 | 5.146094 | 28.91807 | 6.01E-91  | 1.60E-89  | 195.634  |
| PLA1A       | 1.749577 | 1.840211 | 24.32415 | 1.67E-74  | 2.39E-73  | 157.7077 |
| POPDC2      | 1.125665 | 1.57914  | 15.44732 | 1.56E-40  | 9.51E-40  | 79.45374 |
| COX17       | 1.872533 | 5.379261 | 30.29096 | 1.20E-95  | 4.01E-94  | 206.4716 |
| MAATS1      | -1.60526 | 2.336063 | -24.0176 | 2.28E-73  | 3.13E-72  | 155.0919 |
| NR1I2       | 2.260821 | 1.273347 | 19.70489 | 5.16E-57  | 4.50E-56  | 117.3964 |
| GSK3B       | 2.014725 | 2.931994 | 38.00361 | 3.78E-120 | 5.34E-118 | 263.0123 |
| LRRC58      | 1.03077  | 2.251369 | 19.75565 | 3.28E-57  | 2.88E-56  | 117.8476 |
| FSTL1       | 3.45832  | 4.78088  | 30.01231 | 1.06E-94  | 3.40E-93  | 204.291  |
| NDUFB4      | 1.566382 | 6.583603 | 21.10717 | 2.12E-62  | 2.12E-61  | 129.8088 |
| RABL3       | 1.266343 | 2.427494 | 24.72123 | 5.75E-76  | 8.64E-75  | 161.0817 |
| GTF2E1      | 1.089887 | 1.920476 | 25.13404 | 1.76E-77  | 2.78E-76  | 164.5711 |
| HCLS1       | 2.267045 | 3.728149 | 20.12378 | 1.25E-58  | 1.14E-57  | 121.1159 |
| ILDR1       | 1.341495 | 2.178693 | 21.94889 | 1.32E-65  | 1.44E-64  | 137.1961 |
| CD86        | 2.359458 | 1.590162 | 31.06344 | 3.04E-98  | 1.16E-96  | 212.4658 |
| CSTA        | 2.977296 | 2.540084 | 28.90672 | 6.57E-91  | 1.75E-89  | 195.5434 |

|            |           |           |           |            |            |           |
|------------|-----------|-----------|-----------|------------|------------|-----------|
| CCDC58     | 1. 156134 | 3. 894058 | 20. 07018 | 2. 01E-58  | 1. 82E-57  | 120. 6405 |
| KPNA1      | 1. 217489 | 3. 3816   | 18. 33411 | 1. 04E-51  | 8. 02E-51  | 105. 1774 |
| PARP9      | 1. 829761 | 4. 044058 | 22. 73188 | 1. 45E-68  | 1. 72E-67  | 144. 0161 |
| DTX3L      | 1. 664117 | 3. 371679 | 24. 26431 | 2. 78E-74  | 3. 95E-73  | 157. 1978 |
| PARP14     | 1. 986184 | 3. 120187 | 28. 0223  | 7. 92E-88  | 1. 81E-86  | 188. 4366 |
| SEC22A     | 1. 358981 | 2. 925388 | 25. 51981 | 6. 91E-79  | 1. 14E-77  | 167. 815  |
| HACD2      | 1. 608246 | 3. 257289 | 26. 05699 | 7. 82E-81  | 1. 38E-79  | 172. 3037 |
| MYLK       | 2. 78216  | 3. 435465 | 22. 50164 | 1. 07E-67  | 1. 24E-66  | 142. 0163 |
| KALRN      | 1. 029316 | 3. 154357 | 11. 15692 | 1. 31E-24  | 5. 78E-24  | 42. 87738 |
| UMPS       | 1. 598523 | 3. 51396  | 29. 56339 | 3. 61E-93  | 1. 07E-91  | 200. 7575 |
| ITGB5      | 3. 727229 | 5. 395097 | 40. 85284 | 2. 00E-128 | 4. 85E-126 | 282. 1167 |
| MUC13      | 4. 709779 | 3. 318653 | 34. 49241 | 2. 19E-109 | 1. 60E-107 | 238. 174  |
| HEG1       | 1. 472993 | 3. 040396 | 16. 2673  | 1. 07E-43  | 6. 97E-43  | 86. 73001 |
| SLC12A8    | 1. 390886 | 3. 131607 | 20. 33113 | 2. 00E-59  | 1. 84E-58  | 122. 9537 |
| ZNF148     | 1. 30696  | 2. 072323 | 25. 01664 | 4. 74E-77  | 7. 35E-76  | 163. 5807 |
| SNX4       | 1. 417198 | 3. 462243 | 24. 90348 | 1. 23E-76  | 1. 89E-75  | 162. 6245 |
| OSBPL11    | 1. 383199 | 1. 769418 | 29. 8602  | 3. 50E-94  | 1. 09E-92  | 203. 0965 |
| ALG1L      | 1. 834654 | 1. 400798 | 19. 4778  | 3. 88E-56  | 3. 32E-55  | 115. 3765 |
| SLC41A3    | 1. 181091 | 4. 404248 | 19. 59524 | 1. 37E-56  | 1. 18E-55  | 116. 4214 |
| ALDH1L1    | -1. 42107 | 3. 442643 | -11. 5979 | 3. 63E-26  | 1. 65E-25  | 46. 45174 |
| KLF15      | -2. 45086 | 3. 051746 | -27. 9411 | 1. 53E-87  | 3. 44E-86  | 187. 7791 |
| CHCHD6     | 1. 446273 | 3. 201577 | 30. 73313 | 3. 89E-97  | 1. 40E-95  | 209. 9119 |
| PLXNA1     | 1. 551295 | 3. 062074 | 19. 73707 | 3. 87E-57  | 3. 39E-56  | 117. 6825 |
| TPRA1      | 1. 245229 | 4. 214397 | 21. 9838  | 9. 72E-66  | 1. 06E-64  | 137. 5013 |
| MCM2       | 2. 198087 | 2. 182214 | 34. 21247 | 1. 69E-108 | 1. 16E-106 | 236. 1297 |
| PODXL2     | 1. 405953 | 2. 65642  | 17. 22167 | 2. 15E-47  | 1. 51E-46  | 95. 2396  |
| ABTB1      | 1. 234294 | 4. 383174 | 16. 16354 | 2. 70E-43  | 1. 74E-42  | 85. 80702 |
| MGLL       | 4. 008214 | 3. 843112 | 43. 41198 | 1. 56E-135 | 7. 05E-133 | 298. 5196 |
| RUVBL1     | 1. 98678  | 4. 018699 | 33. 71307 | 6. 57E-107 | 4. 11E-105 | 232. 4591 |
| EEFSEC     | 1. 192075 | 3. 002419 | 26. 09564 | 5. 67E-81  | 1. 00E-79  | 172. 6254 |
| GATA2-AS1  | -1. 28273 | 1. 764015 | -20. 1284 | 1. 20E-58  | 1. 09E-57  | 121. 1573 |
| RPN1       | 2. 088236 | 6. 33731  | 30. 73463 | 3. 84E-97  | 1. 38E-95  | 209. 9235 |
| RAB7A      | 2. 163334 | 6. 013878 | 32. 01276 | 2. 16E-101 | 9. 74E-100 | 219. 7298 |
| ACAD9      | 1. 014904 | 3. 78935  | 19. 34991 | 1. 21E-55  | 1. 02E-54  | 114. 2381 |
| RAB43      | 1. 417476 | 2. 42321  | 19. 08528 | 1. 28E-54  | 1. 05E-53  | 111. 8804 |
| ISY1-RAB43 | 1. 186266 | 2. 511218 | 19. 46671 | 4. 28E-56  | 3. 66E-55  | 115. 2779 |
| ISY1       | 1. 413246 | 3. 786263 | 26. 04184 | 8. 87E-81  | 1. 56E-79  | 172. 1776 |
| COPG1      | 1. 280241 | 6. 484734 | 18. 46359 | 3. 27E-52  | 2. 55E-51  | 106. 3337 |
| HMCE5      | 2. 434416 | 3. 875441 | 41. 62922 | 1. 30E-130 | 3. 80E-128 | 287. 1666 |
| H1FX       | 1. 086944 | 5. 694425 | 11. 67727 | 1. 89E-26  | 8. 65E-26  | 47. 10124 |
| PLXND1     | 2. 157952 | 4. 930776 | 26. 3079  | 9. 75E-82  | 1. 77E-80  | 174. 389  |
| TMCC1      | 1. 625512 | 2. 855044 | 28. 48495 | 1. 91E-89  | 4. 73E-88  | 192. 1663 |
| PIK3R4     | 1. 435308 | 3. 595081 | 26. 8848  | 8. 37E-84  | 1. 64E-82  | 179. 1554 |
| ATP2C1     | 2. 046172 | 4. 648157 | 28. 68734 | 3. 79E-90  | 9. 72E-89  | 193. 7896 |
| NEK11      | 1. 184174 | 1. 724284 | 21. 62948 | 2. 16E-64  | 2. 28E-63  | 134. 3992 |
| NUDT16     | 1. 128631 | 3. 198554 | 19. 59061 | 1. 42E-56  | 1. 23E-55  | 116. 3802 |
| MRPL3      | 1. 293093 | 5. 025448 | 21. 21563 | 8. 15E-63  | 8. 26E-62  | 130. 7636 |
| DNAJC13    | 1. 400887 | 2. 844827 | 26. 28493 | 1. 18E-81  | 2. 14E-80  | 174. 1984 |
| ACKR4      | 1. 322439 | 1. 477394 | 18. 06139 | 1. 19E-50  | 8. 92E-50  | 102. 7413 |
| CDV3       | 1. 15569  | 5. 316949 | 16. 5757  | 6. 87E-45  | 4. 58E-44  | 89. 47635 |
| SLCO2A1    | 1. 017851 | 3. 684639 | 10. 64214 | 8. 06E-23  | 3. 41E-22  | 38. 7825  |
| AMOTL2     | 1. 165556 | 3. 422687 | 14. 93131 | 1. 49E-38  | 8. 72E-38  | 74. 90147 |
| ANAPC13    | 1. 280338 | 4. 833908 | 21. 79738 | 4. 96E-65  | 5. 34E-64  | 135. 8704 |
| MSL2       | 1. 052029 | 2. 682927 | 19. 98557 | 4. 27E-58  | 3. 81E-57  | 119. 8897 |



|               |           |           |           |            |            |           |
|---------------|-----------|-----------|-----------|------------|------------|-----------|
| PCCB          | 1. 29541  | 3. 568183 | 26. 77031 | 2. 14E-83  | 4. 14E-82  | 178. 2126 |
| NCK1-AS1      | 1. 42017  | 1. 48472  | 33. 74175 | 5. 32E-107 | 3. 34E-105 | 232. 6707 |
| NCK1          | 1. 971126 | 3. 524889 | 28. 2102  | 1. 74E-88  | 4. 09E-87  | 189. 9545 |
| IL20RB        | 1. 838608 | 1. 205917 | 15. 4869  | 1. 10E-40  | 6. 71E-40  | 79. 80388 |
| CLDN18        | 5. 305963 | 2. 854309 | 24. 39842 | 8. 88E-75  | 1. 28E-73  | 158. 3401 |
| ARMC8         | 1. 12925  | 3. 350491 | 20. 00828 | 3. 49E-58  | 3. 13E-57  | 120. 0912 |
| MRAS          | 1. 780141 | 2. 558771 | 22. 55584 | 6. 68E-68  | 7. 78E-67  | 142. 4875 |
| SPSB4         | -1. 87756 | 1. 772341 | -29. 5796 | 3. 18E-93  | 9. 43E-92  | 200. 8855 |
| ZBTB38        | 1. 587794 | 3. 31817  | 20. 98416 | 6. 25E-62  | 6. 17E-61  | 128. 7248 |
| RASA2         | 1. 110404 | 2. 120323 | 20. 26498 | 3. 59E-59  | 3. 29E-58  | 122. 3677 |
| RNF7          | 1. 663292 | 5. 711457 | 25. 02726 | 4. 34E-77  | 6. 73E-76  | 163. 6703 |
| ATP1B3        | 2. 752756 | 5. 2438   | 34. 81642 | 2. 09E-110 | 1. 61E-108 | 240. 528  |
| TFDP2         | 1. 462284 | 2. 86988  | 28. 42174 | 3. 18E-89  | 7. 77E-88  | 191. 6582 |
| PLS1          | 3. 012906 | 3. 313084 | 32. 96438 | 1. 69E-104 | 9. 13E-103 | 226. 8983 |
| PCOLCE2       | 1. 85798  | 1. 496896 | 20. 70443 | 7. 36E-61  | 7. 09E-60  | 126. 256  |
| CHST2         | 1. 0377   | 1. 067481 | 19. 51948 | 2. 68E-56  | 2. 30E-55  | 115. 7474 |
| SLC9A9        | 1. 260297 | 1. 195719 | 19. 2498  | 2. 95E-55  | 2. 47E-54  | 113. 3465 |
| C3orf58       | 1. 797325 | 2. 104632 | 32. 58022 | 2. 99E-103 | 1. 51E-101 | 224. 018  |
| PLOD2         | 1. 657133 | 3. 827848 | 15. 61127 | 3. 65E-41  | 2. 25E-40  | 80. 90491 |
| PLSCR4        | 1. 099729 | 3. 213501 | 13. 13271 | 9. 23E-32  | 4. 72E-31  | 59. 29027 |
| PLSCR1        | 2. 18686  | 5. 285995 | 23. 38652 | 5. 09E-71  | 6. 49E-70  | 149. 6755 |
| CPB1          | -7. 46497 | 10. 13539 | -19. 1655 | 6. 26E-55  | 5. 21E-54  | 112. 5953 |
| RP11-680B3. 2 | -4. 22542 | 2. 983429 | -33. 7141 | 6. 52E-107 | 4. 09E-105 | 232. 4663 |
| CPA3          | 1. 381573 | 2. 828572 | 13. 13482 | 9. 06E-32  | 4. 64E-31  | 59. 30828 |
| HPS3          | 1. 261628 | 3. 175788 | 22. 23627 | 1. 08E-66  | 1. 21E-65  | 139. 7054 |
| CP            | 2. 970613 | 3. 102974 | 16. 11486 | 4. 17E-43  | 2. 67E-42  | 85. 37418 |
| TM4SF1        | 3. 329295 | 6. 857747 | 26. 17456 | 2. 95E-81  | 5. 26E-80  | 173. 2817 |
| TM4SF1-AS1    | 1. 03876  | 1. 157536 | 13. 14322 | 8. 44E-32  | 4. 32E-31  | 59. 38001 |
| TM4SF4        | 3. 096541 | 5. 632771 | 18. 56827 | 1. 29E-52  | 1. 01E-51  | 107. 2683 |
| WWTR1         | 1. 988988 | 3. 896206 | 19. 89073 | 9. 90E-58  | 8. 79E-57  | 119. 0476 |
| COMMD2        | 1. 366427 | 3. 025949 | 23. 36555 | 6. 09E-71  | 7. 76E-70  | 149. 4948 |
| RNF13         | 1. 430369 | 4. 471204 | 21. 78637 | 5. 46E-65  | 5. 87E-64  | 135. 774  |
| PFN2          | 1. 139194 | 4. 388426 | 12. 77493 | 1. 95E-30  | 9. 69E-30  | 56. 24932 |
| P11-651P23.   | 1. 385239 | 1. 565647 | 24. 06083 | 1. 57E-73  | 2. 18E-72  | 155. 4611 |
| TSC22D2       | 1. 237356 | 3. 000032 | 19. 67999 | 6. 43E-57  | 5. 61E-56  | 117. 175  |
| SELT          | 1. 541833 | 5. 182786 | 22. 18216 | 1. 72E-66  | 1. 93E-65  | 139. 2334 |
| GPR171        | 1. 218716 | 0. 931298 | 14. 23042 | 6. 95E-36  | 3. 85E-35  | 68. 76332 |
| GPR87         | 2. 428119 | 1. 194718 | 19. 52026 | 2. 66E-56  | 2. 29E-55  | 115. 7543 |
| AADAC         | -1. 03856 | 2. 995854 | -7. 16249 | 5. 56E-12  | 1. 81E-11  | 14. 05696 |
| SUCNR1        | 1. 166304 | 0. 60546  | 14. 3278  | 2. 97E-36  | 1. 66E-35  | 69. 61256 |
| MBNL1         | 1. 975231 | 4. 007026 | 28. 39643 | 3. 89E-89  | 9. 47E-88  | 191. 4547 |
| RAP2B         | 2. 525647 | 2. 413331 | 47. 01495 | 4. 78E-145 | 4. 52E-142 | 320. 4796 |
| DHX36         | 1. 110999 | 4. 016557 | 17. 67512 | 3. 75E-49  | 2. 73E-48  | 99. 29008 |
| MME           | 1. 564888 | 1. 133575 | 17. 00511 | 1. 49E-46  | 1. 03E-45  | 93. 30623 |
| GMPS          | 1. 354005 | 4. 144444 | 21. 17984 | 1. 12E-62  | 1. 13E-61  | 130. 4486 |
| TIPARP        | 2. 064278 | 3. 008317 | 29. 39843 | 1. 33E-92  | 3. 82E-91  | 199. 4527 |
| RSRC1         | 1. 54898  | 3. 102681 | 27. 94168 | 1. 52E-87  | 3. 42E-86  | 187. 7839 |
| MLF1          | 2. 174323 | 2. 371339 | 27. 59143 | 2. 60E-86  | 5. 58E-85  | 184. 9394 |
| GFM1          | 1. 156433 | 3. 609603 | 21. 45775 | 9. 72E-64  | 1. 01E-62  | 132. 8922 |
| LXN           | 2. 67866  | 3. 75396  | 36. 02171 | 3. 76E-114 | 3. 72E-112 | 249. 1732 |
| RARRES1       | 2. 978545 | 3. 45259  | 21. 07254 | 2. 87E-62  | 2. 86E-61  | 129. 5037 |
| MFS1          | 1. 836283 | 4. 575866 | 26. 40737 | 4. 28E-82  | 7. 89E-81  | 175. 2136 |
| IQCJ-SCHIP1   | 2. 477563 | 1. 85277  | 34. 38356 | 4. 84E-109 | 3. 45E-107 | 237. 3803 |
| C3orf80       | 1. 387841 | 0. 806898 | 26. 21471 | 2. 11E-81  | 3. 79E-80  | 173. 6154 |

|               |           |           |           |            |            |           |
|---------------|-----------|-----------|-----------|------------|------------|-----------|
| SMC4          | 1. 530877 | 3. 171927 | 23. 51473 | 1. 69E-71  | 2. 18E-70  | 150. 779  |
| TRIM59        | 1. 732865 | 1. 370405 | 33. 32637 | 1. 14E-105 | 6. 65E-104 | 229. 5956 |
| KPNA4         | 1. 843256 | 2. 943638 | 34. 22828 | 1. 50E-108 | 1. 04E-106 | 236. 2454 |
| KRT8P12       | 1. 795343 | 1. 972792 | 31. 76235 | 1. 45E-100 | 6. 23E-99  | 217. 8247 |
| ARL14         | 2. 678117 | 3. 16071  | 20. 91263 | 1. 17E-61  | 1. 15E-60  | 128. 0939 |
| B3GALNT1      | 1. 454497 | 2. 190115 | 23. 66889 | 4. 50E-72  | 5. 92E-71  | 152. 1038 |
| NMD3          | 1. 010019 | 4. 098432 | 14. 29125 | 4. 09E-36  | 2. 27E-35  | 69. 29363 |
| SPTSSB        | 2. 196078 | 1. 46935  | 21. 25636 | 5. 70E-63  | 5. 80E-62  | 131. 1219 |
| RPL23AP42     | 1. 591983 | 9. 310465 | 17. 79269 | 1. 31E-49  | 9. 65E-49  | 100. 3405 |
| SERPINI2      | -5. 5805  | 4. 769029 | -28. 5436 | 1. 20E-89  | 2. 98E-88  | 192. 6376 |
| PDCD10        | 1. 858465 | 4. 249969 | 29. 18868 | 6. 99E-92  | 1. 95E-90  | 197. 7888 |
| SERPINI1      | -1. 08472 | 3. 058625 | -16. 3149 | 7. 02E-44  | 4. 58E-43  | 87. 15337 |
| GOLIM4        | 1. 888449 | 3. 273516 | 24. 51691 | 3. 25E-75  | 4. 76E-74  | 159. 3477 |
| RP11-641D5. 1 | 2. 371679 | 6. 951142 | 30. 78298 | 2. 64E-97  | 9. 62E-96  | 210. 2982 |
| LRRC31        | 1. 141285 | 0. 564439 | 13. 73783 | 5. 04E-34  | 2. 70E-33  | 64. 48825 |
| GPR160        | 1. 239922 | 3. 119349 | 15. 02326 | 6. 61E-39  | 3. 91E-38  | 75. 71083 |
| PRKCI         | 2. 064064 | 3. 103416 | 29. 58083 | 3. 15E-93  | 9. 35E-92  | 200. 8952 |
| SKIL          | 2. 593335 | 2. 948617 | 34. 45748 | 2. 83E-109 | 2. 04E-107 | 237. 9194 |
| CLDN11        | 2. 369897 | 1. 8119   | 26. 14346 | 3. 81E-81  | 6. 78E-80  | 173. 0232 |
| RPL22L1       | 1. 037795 | 5. 811642 | 11. 34582 | 2. 84E-25  | 1. 27E-24  | 44. 40139 |
| EIF5A2        | 1. 960262 | 1. 684245 | 32. 50044 | 5. 45E-103 | 2. 70E-101 | 223. 4176 |
| TNIK          | 1. 973609 | 2. 325685 | 27. 222   | 5. 28E-85  | 1. 08E-83  | 181. 923  |
| FNDC3B        | 1. 370673 | 3. 77594  | 18. 46342 | 3. 28E-52  | 2. 55E-51  | 106. 3322 |
| TNFSF10       | 2. 555574 | 4. 407139 | 30. 91579 | 9. 48E-98  | 3. 51E-96  | 211. 3259 |
| NCEH1         | 2. 319472 | 2. 460368 | 31. 9716  | 2. 95E-101 | 1. 31E-99  | 219. 4172 |
| ECT2          | 2. 851627 | 2. 251211 | 41. 07179 | 4. 79E-129 | 1. 25E-126 | 283. 5475 |
| NAALADL2      | 1. 370055 | 1. 247303 | 25. 35995 | 2. 64E-78  | 4. 29E-77  | 166. 4728 |
| TBL1XR1       | 1. 61938  | 3. 823489 | 26. 28628 | 1. 17E-81  | 2. 11E-80  | 174. 2096 |
| LINC00578     | 1. 328609 | 0. 728996 | 20. 08363 | 1. 79E-58  | 1. 61E-57  | 120. 7598 |
| ZMAT3         | 1. 137081 | 1. 839124 | 20. 61551 | 1. 61E-60  | 1. 54E-59  | 125. 4702 |
| PIK3CA        | 1. 451625 | 2. 230292 | 22. 32536 | 4. 95E-67  | 5. 63E-66  | 140. 4818 |
| ZNF639        | 1. 089826 | 3. 457416 | 19. 01297 | 2. 44E-54  | 1. 99E-53  | 111. 2359 |
| GNB4          | 2. 085535 | 1. 776626 | 28. 92341 | 5. 76E-91  | 1. 54E-89  | 195. 6766 |
| AC007620. 3   | 1. 768492 | 1. 428488 | 22. 30226 | 6. 05E-67  | 6. 86E-66  | 140. 2806 |
| ACTL6A        | 1. 395527 | 4. 306619 | 23. 7819  | 1. 71E-72  | 2. 29E-71  | 153. 0734 |
| MRPL47        | 2. 262925 | 3. 931552 | 39. 9552  | 7. 34E-126 | 1. 49E-123 | 276. 1961 |
| NDUFB5        | 1. 641321 | 5. 361071 | 27. 04335 | 2. 28E-84  | 4. 55E-83  | 180. 4584 |
| PEX5L         | -1. 04728 | 0. 701847 | -28. 688  | 3. 77E-90  | 9. 68E-89  | 193. 7951 |
| FXR1          | 1. 054879 | 5. 287298 | 15. 55302 | 6. 12E-41  | 3. 75E-40  | 80. 38909 |
| ATP11B        | 1. 601712 | 3. 234626 | 24. 54351 | 2. 59E-75  | 3. 81E-74  | 159. 5737 |
| DCUN1D1       | 1. 489532 | 2. 536882 | 24. 7868  | 3. 30E-76  | 5. 00E-75  | 161. 6372 |
| LAMP3         | 1. 037255 | 1. 752692 | 13. 07236 | 1. 55E-31  | 7. 87E-31  | 58. 77557 |
| B3GNT5        | 2. 316374 | 2. 477077 | 31. 52424 | 8. 88E-100 | 3. 65E-98  | 216. 0059 |
| KLHL6         | 1. 476609 | 1. 037964 | 20. 5279  | 3. 50E-60  | 3. 31E-59  | 124. 6954 |
| YEATS2        | 1. 275657 | 2. 621429 | 22. 49484 | 1. 13E-67  | 1. 31E-66  | 141. 9571 |
| PARL          | 1. 463937 | 4. 972623 | 25. 03891 | 3. 93E-77  | 6. 12E-76  | 163. 7687 |
| AP2M1         | 2. 227062 | 6. 750558 | 29. 70938 | 1. 14E-93  | 3. 47E-92  | 201. 9094 |
| ECE2          | -1. 22216 | 3. 380735 | -17. 1858 | 2. 97E-47  | 2. 08E-46  | 94. 91966 |
| CAMK2N2       | -2. 42599 | 2. 438913 | -27. 1962 | 6. 52E-85  | 1. 32E-83  | 181. 7114 |
| PSMD2         | 1. 874074 | 5. 929826 | 26. 47497 | 2. 45E-82  | 4. 55E-81  | 175. 7734 |
| EIF4G1        | 1. 141655 | 6. 698844 | 15. 65753 | 2. 42E-41  | 1. 50E-40  | 81. 31481 |
| FAM131A       | 1. 258442 | 3. 081026 | 20. 37697 | 1. 33E-59  | 1. 24E-58  | 123. 3596 |
| POLR2H        | 1. 337611 | 5. 467911 | 18. 46613 | 3. 20E-52  | 2. 49E-51  | 106. 3563 |
| CHRD          | -1. 40693 | 3. 226672 | -14. 512  | 5. 92E-37  | 3. 36E-36  | 71. 22247 |

|             |           |           |           |            |            |           |
|-------------|-----------|-----------|-----------|------------|------------|-----------|
| MAGEF1      | 1. 507464 | 4. 173075 | 26. 55012 | 1. 32E-82  | 2. 47E-81  | 176. 395  |
| MAP3K13     | 1. 495684 | 3. 681557 | 25. 90324 | 2. 81E-80  | 4. 85E-79  | 171. 0224 |
| TMEM41A     | 1. 578272 | 3. 051379 | 29. 12498 | 1. 16E-91  | 3. 20E-90  | 197. 2824 |
| LIPH        | 3. 316537 | 2. 910514 | 37. 95847 | 5. 16E-120 | 7. 20E-118 | 262. 7023 |
| IGF2BP2     | 1. 963403 | 2. 738795 | 23. 4887  | 2. 11E-71  | 2. 72E-70  | 150. 5551 |
| TRA2B       | 1. 328205 | 5. 301982 | 20. 14077 | 1. 08E-58  | 9. 79E-58  | 121. 2666 |
| DNAJB11     | 1. 455081 | 6. 150037 | 22. 07928 | 4. 23E-66  | 4. 68E-65  | 138. 3355 |
| PSMD10P2    | 1. 084185 | 0. 535435 | 18. 296   | 1. 46E-51  | 1. 12E-50  | 104. 8371 |
| RFC4        | 1. 103435 | 3. 262837 | 18. 78114 | 1. 92E-53  | 1. 54E-52  | 109. 1682 |
| ST6GAL1     | 2. 654853 | 2. 969766 | 30. 94239 | 7. 72E-98  | 2. 88E-96  | 211. 5315 |
| RPL39L      | 2. 676309 | 2. 148821 | 31. 00915 | 4. 62E-98  | 1. 75E-96  | 212. 047  |
| RTP4        | 2. 748221 | 2. 220243 | 40. 2397  | 1. 12E-126 | 2. 39E-124 | 278. 0822 |
| P11-567G11. | 1. 867442 | 0. 914789 | 26. 88087 | 8. 64E-84  | 1. 69E-82  | 179. 123  |
| LPP         | 1. 755821 | 2. 588005 | 25. 02514 | 4. 41E-77  | 6. 85E-76  | 163. 6525 |
| TPRG1       | 2. 141172 | 1. 501276 | 25. 36193 | 2. 60E-78  | 4. 22E-77  | 166. 4894 |
| P3H2        | 2. 291517 | 2. 322547 | 25. 13191 | 1. 80E-77  | 2. 83E-76  | 164. 5532 |
| CLDN1       | 1. 937804 | 4. 516897 | 17. 71304 | 2. 67E-49  | 1. 95E-48  | 99. 62887 |
| IL1RAP      | 2. 36574  | 2. 011069 | 31. 55093 | 7. 24E-100 | 3. 00E-98  | 216. 2101 |
| MB21D2      | 1. 517016 | 1. 169142 | 32. 9621  | 1. 72E-104 | 9. 28E-103 | 226. 8813 |
| OPA1        | 1. 286158 | 3. 4175   | 19. 4798  | 3. 81E-56  | 3. 26E-55  | 115. 3944 |
| HES1        | 1. 860417 | 4. 751573 | 21. 08941 | 2. 47E-62  | 2. 47E-61  | 129. 6523 |
| LRRC15      | 2. 435615 | 1. 184725 | 21. 86679 | 2. 70E-65  | 2. 93E-64  | 136. 4779 |
| ATP13A3     | 1. 808656 | 3. 817245 | 24. 78996 | 3. 21E-76  | 4. 87E-75  | 161. 664  |
| TMEM44      | 2. 291314 | 2. 919198 | 33. 14735 | 4. 32E-105 | 2. 43E-103 | 228. 2637 |
| FAM43A      | 1. 479905 | 1. 792522 | 23. 29266 | 1. 14E-70  | 1. 44E-69  | 148. 8666 |
| XXYL1       | 2. 031964 | 2. 067699 | 39. 38608 | 3. 25E-124 | 5. 87E-122 | 272. 396  |
| XXYL1-AS2   | 1. 480536 | 0. 736244 | 20. 07274 | 1. 97E-58  | 1. 78E-57  | 120. 6631 |
| ACAP2       | 1. 36741  | 2. 527628 | 23. 40129 | 4. 48E-71  | 5. 73E-70  | 149. 8027 |
| PPP1R2      | 2. 109352 | 3. 893662 | 33. 64669 | 1. 07E-106 | 6. 57E-105 | 231. 9688 |
| APOD        | 1. 760954 | 6. 924586 | 12. 50956 | 1. 84E-29  | 8. 95E-29  | 54. 0112  |
| AC069213. 1 | 1. 203687 | 1. 897987 | 11. 67705 | 1. 89E-26  | 8. 67E-26  | 47. 09949 |
| MUC20       | 2. 772798 | 4. 426228 | 22. 15143 | 2. 25E-66  | 2. 51E-65  | 138. 9653 |
| MUC4        | 3. 233169 | 2. 113507 | 22. 22516 | 1. 18E-66  | 1. 33E-65  | 139. 6085 |
| TNK2        | 1. 59902  | 4. 587762 | 17. 47692 | 2. 20E-48  | 1. 58E-47  | 97. 51939 |
| TFRC        | 1. 679004 | 3. 772683 | 22. 39965 | 2. 59E-67  | 2. 97E-66  | 141. 1288 |
| PCYT1A      | 1. 250813 | 3. 612388 | 21. 41903 | 1. 36E-63  | 1. 41E-62  | 132. 552  |
| TCTEX1D2    | 1. 625973 | 2. 614221 | 25. 27684 | 5. 31E-78  | 8. 54E-77  | 165. 7738 |
| TM4SF19     | 1. 008001 | 0. 573226 | 18. 04101 | 1. 43E-50  | 1. 07E-49  | 102. 5592 |
| RNF168      | 1. 261539 | 2. 074603 | 27. 98362 | 1. 08E-87  | 2. 45E-86  | 188. 1235 |
| WDR53       | 1. 532194 | 2. 360183 | 30. 53106 | 1. 86E-96  | 6. 46E-95  | 208. 3427 |
| FBX045      | 1. 317541 | 1. 935871 | 30. 21547 | 2. 17E-95  | 7. 17E-94  | 205. 8818 |
| NRROS       | 1. 128321 | 1. 091377 | 18. 82935 | 1. 25E-53  | 1. 01E-52  | 109. 5982 |
| PIGX        | 1. 362936 | 2. 805626 | 28. 6202  | 6. 48E-90  | 1. 64E-88  | 193. 2517 |
| PAK2        | 2. 041239 | 3. 432587 | 33. 36435 | 8. 64E-106 | 5. 05E-104 | 229. 8776 |
| NCBP2       | 1. 659022 | 4. 505484 | 28. 03215 | 7. 32E-88  | 1. 67E-86  | 188. 5162 |
| NCBP2-AS2   | 1. 275185 | 3. 686539 | 22. 31883 | 5. 24E-67  | 5. 95E-66  | 140. 4249 |
| MFI2        | 2. 814698 | 3. 080884 | 25. 77502 | 8. 19E-80  | 1. 40E-78  | 169. 9517 |
| DLG1        | 1. 249709 | 3. 580587 | 20. 46472 | 6. 12E-60  | 5. 74E-59  | 124. 1364 |
| BDH1        | 1. 485564 | 3. 073506 | 19. 84339 | 1. 51E-57  | 1. 33E-56  | 118. 6271 |
| FYTTD1      | 1. 03055  | 3. 378255 | 13. 67781 | 8. 47E-34  | 4. 51E-33  | 63. 96984 |
| LRCH3       | 1. 096938 | 3. 055459 | 17. 48544 | 2. 04E-48  | 1. 46E-47  | 97. 5955  |
| AC144530. 1 | 1. 041617 | 0. 806438 | 27. 10791 | 1. 34E-84  | 2. 70E-83  | 180. 9881 |
| ATP5I       | 1. 687733 | 7. 764717 | 20. 47433 | 5. 62E-60  | 5. 28E-59  | 124. 2214 |
| MFS7        | 1. 210725 | 2. 638855 | 15. 68502 | 1. 90E-41  | 1. 18E-40  | 81. 55836 |

|             |           |           |           |            |            |           |
|-------------|-----------|-----------|-----------|------------|------------|-----------|
| DGKQ        | 1. 058283 | 2. 732925 | 15. 95045 | 1. 80E-42  | 1. 14E-41  | 83. 91329 |
| RNF212      | -1. 85227 | 2. 787259 | -18. 3584 | 8. 37E-52  | 6. 47E-51  | 105. 3943 |
| TMED11P     | -4. 72688 | 3. 655638 | -29. 8238 | 4. 66E-94  | 1. 44E-92  | 202. 81   |
| SPON2       | 3. 087326 | 4. 981253 | 28. 492   | 1. 81E-89  | 4. 47E-88  | 192. 2229 |
| CTBP1-AS2   | 1. 020475 | 2. 447607 | 17. 23242 | 1. 96E-47  | 1. 37E-46  | 95. 33562 |
| P11-1398P2. | 2. 135291 | 1. 461357 | 36. 6315  | 5. 11E-116 | 5. 65E-114 | 253. 4805 |
| SLBP        | 1. 828286 | 4. 132486 | 29. 07069 | 1. 78E-91  | 4. 89E-90  | 196. 8504 |
| TACC3       | 2. 899433 | 2. 861476 | 41. 17656 | 2. 42E-129 | 6. 55E-127 | 284. 2302 |
| FGFR3       | -1. 42459 | 4. 518272 | -12. 8436 | 1. 09E-30  | 5. 44E-30  | 56. 83066 |
| C4orf48     | 1. 375039 | 3. 448235 | 9. 615586 | 2. 24E-19  | 8. 80E-19  | 30. 90371 |
| RNF4        | 1. 197728 | 4. 219638 | 19. 39705 | 7. 96E-56  | 6. 76E-55  | 114. 6578 |
| TNIP2       | 1. 68411  | 4. 293387 | 25. 10562 | 2. 24E-77  | 3. 52E-76  | 164. 3315 |
| SH3BP2      | 1. 242137 | 3. 882085 | 14. 94316 | 1. 34E-38  | 7. 86E-38  | 75. 00577 |
| ADD1        | 1. 513369 | 6. 005091 | 21. 98465 | 9. 65E-66  | 1. 06E-64  | 137. 5087 |
| MFSD10      | 1. 681023 | 5. 492585 | 17. 81241 | 1. 10E-49  | 8. 11E-49  | 100. 5167 |
| RGS12       | 1. 743818 | 3. 368149 | 23. 08193 | 7. 02E-70  | 8. 68E-69  | 147. 0473 |
| LRPAP1      | 1. 161489 | 6. 133182 | 16. 99747 | 1. 59E-46  | 1. 10E-45  | 93. 23803 |
| TMEM128     | 1. 247665 | 3. 737659 | 22. 2899  | 6. 74E-67  | 7. 62E-66  | 140. 1729 |
| LYAR        | 1. 697843 | 2. 780358 | 30. 99586 | 5. 11E-98  | 1. 93E-96  | 211. 9444 |
| D4S234E     | 1. 08201  | 1. 126935 | 13. 10744 | 1. 15E-31  | 5. 85E-31  | 59. 07469 |
| MSX1        | 1. 071626 | 1. 391863 | 18. 37385 | 7. 29E-52  | 5. 64E-51  | 105. 5323 |
| WFS1        | 1. 35778  | 3. 827675 | 17. 70712 | 2. 82E-49  | 2. 06E-48  | 99. 57603 |
| PPP2R2C     | 1. 628645 | 1. 04599  | 16. 09486 | 4. 98E-43  | 3. 19E-42  | 85. 19638 |
| MAN2B2      | 1. 197463 | 3. 508899 | 21. 05814 | 3. 26E-62  | 3. 25E-61  | 129. 3768 |
| MRFAP1      | 1. 806326 | 6. 708879 | 24. 83646 | 2. 17E-76  | 3. 31E-75  | 162. 0576 |
| AC093323. 3 | 1. 399639 | 2. 386636 | 26. 49787 | 2. 03E-82  | 3. 77E-81  | 175. 9628 |
| S100P       | 8. 276393 | 4. 622318 | 51. 44228 | 5. 15E-156 | 1. 07E-152 | 345. 7972 |
| MRFAP1L1    | 1. 636808 | 4. 615361 | 27. 51463 | 4. 85E-86  | 1. 03E-84  | 184. 3137 |
| BLOC1S4     | 1. 776379 | 2. 810911 | 35. 33898 | 4. 87E-112 | 4. 16E-110 | 244. 2977 |
| KIAA0232    | 1. 418039 | 2. 426706 | 26. 57728 | 1. 05E-82  | 1. 98E-81  | 176. 6195 |
| TBC1D14     | 1. 048914 | 3. 47496  | 17. 26239 | 1. 50E-47  | 1. 05E-46  | 95. 60326 |
| CCDC96      | 1. 046589 | 0. 904211 | 28. 9699  | 3. 98E-91  | 1. 07E-89  | 196. 0474 |
| GRPEL1      | 1. 696722 | 3. 840321 | 28. 59704 | 7. 80E-90  | 1. 97E-88  | 193. 066  |
| SORCS2      | 1. 488492 | 1. 114893 | 21. 19026 | 1. 02E-62  | 1. 03E-61  | 130. 5403 |
| AFAP1-AS1   | 2. 581834 | 1. 271867 | 26. 03789 | 9. 17E-81  | 1. 61E-79  | 172. 1447 |
| AFAP1       | 2. 632536 | 2. 423315 | 40. 42382 | 3. 32E-127 | 7. 36E-125 | 279. 298  |
| ABLIM2      | 1. 558    | 2. 34705  | 20. 27529 | 3. 27E-59  | 3. 01E-58  | 122. 459  |
| SH3TC1      | 1. 500587 | 3. 520734 | 20. 44029 | 7. 60E-60  | 7. 11E-59  | 123. 9202 |
| HTRA3       | 4. 891876 | 4. 000729 | 45. 45418 | 5. 41E-141 | 3. 76E-138 | 311. 1236 |
| CPZ         | 3. 654114 | 2. 32213  | 41. 15096 | 2. 86E-129 | 7. 70E-127 | 284. 0635 |
| SLC2A9      | 1. 273603 | 1. 428796 | 24. 711   | 6. 27E-76  | 9. 40E-75  | 160. 9949 |
| WDR1        | 2. 649626 | 5. 822087 | 35. 61449 | 6. 79E-113 | 6. 10E-111 | 246. 2719 |
| HS3ST1      | 3. 027088 | 1. 723361 | 34. 05504 | 5. 33E-108 | 3. 55E-106 | 234. 9759 |
| RAB28       | 1. 309542 | 2. 892824 | 25. 35161 | 2. 83E-78  | 4. 60E-77  | 166. 4027 |
| NKX3-2      | 1. 104816 | 0. 673791 | 21. 07834 | 2. 73E-62  | 2. 72E-61  | 129. 5547 |
| C1QTNF7     | 1. 015834 | 0. 781458 | 17. 01898 | 1. 32E-46  | 9. 11E-46  | 93. 43005 |
| CC2D2A      | 1. 64868  | 2. 206797 | 21. 82022 | 4. 06E-65  | 4. 38E-64  | 136. 0704 |
| FBXL5       | 1. 336315 | 4. 507527 | 20. 73761 | 5. 49E-61  | 5. 31E-60  | 126. 549  |
| FAM200B     | 1. 271691 | 4. 010521 | 22. 78828 | 8. 90E-69  | 1. 06E-67  | 144. 5052 |
| BST1        | 2. 555513 | 1. 951844 | 23. 9907  | 2. 87E-73  | 3. 93E-72  | 154. 8615 |
| CD38        | 1. 31554  | 0. 867113 | 17. 56788 | 9. 77E-49  | 7. 05E-48  | 98. 33199 |
| FGFBP1      | 2. 645134 | 1. 458001 | 20. 60518 | 1. 77E-60  | 1. 69E-59  | 125. 3788 |
| PROM1       | 2. 264864 | 3. 899848 | 21. 17435 | 1. 17E-62  | 1. 18E-61  | 130. 4003 |
| LDB2        | 1. 315069 | 2. 593919 | 16. 30732 | 7. 51E-44  | 4. 90E-43  | 87. 0861  |

|               |           |           |           |            |            |           |
|---------------|-----------|-----------|-----------|------------|------------|-----------|
| QDPR          | 1. 128886 | 4. 079888 | 18. 61958 | 8. 13E-53  | 6. 42E-52  | 107. 7263 |
| LAP3          | 2. 386768 | 4. 673041 | 31. 39052 | 2. 47E-99  | 9. 92E-98  | 214. 9813 |
| MED28         | 1. 680771 | 3. 895932 | 28. 61566 | 6. 72E-90  | 1. 70E-88  | 193. 2153 |
| NCAPG         | 1. 838507 | 1. 060798 | 35. 99767 | 4. 45E-114 | 4. 39E-112 | 249. 0025 |
| LCORL         | 1. 119045 | 1. 472782 | 24. 75508 | 4. 32E-76  | 6. 51E-75  | 161. 3685 |
| SLIT2         | 1. 496025 | 1. 615554 | 17. 96647 | 2. 77E-50  | 2. 07E-49  | 101. 8932 |
| PACRGL        | 1. 026592 | 2. 655415 | 13. 61637 | 1. 44E-33  | 7. 64E-33  | 63. 43981 |
| RP11-10G12. 1 | 2. 38045  | 1. 232281 | 45. 59755 | 2. 27E-141 | 1. 72E-138 | 311. 9929 |
| PI4K2B        | 1. 263942 | 2. 468649 | 23. 57672 | 9. 93E-72  | 1. 29E-70  | 151. 312  |
| SLC34A2       | 1. 33517  | 2. 238452 | 10. 85897 | 1. 44E-23  | 6. 19E-23  | 40. 49653 |
| SEL1L3        | 1. 990807 | 5. 109656 | 26. 06994 | 7. 02E-81  | 1. 24E-79  | 172. 4115 |
| PCDH7         | 3. 022241 | 1. 642943 | 34. 34821 | 6. 26E-109 | 4. 44E-107 | 237. 1221 |
| ARAP2         | 1. 122327 | 2. 128501 | 19. 10493 | 1. 07E-54  | 8. 88E-54  | 112. 0556 |
| RELL1         | 1. 491075 | 1. 518483 | 24. 91385 | 1. 13E-76  | 1. 73E-75  | 162. 7122 |
| PGM2          | 1. 972187 | 2. 883805 | 32. 9523  | 1. 85E-104 | 9. 96E-103 | 226. 8081 |
| TBC1D1        | 2. 044382 | 4. 688971 | 29. 2059  | 6. 10E-92  | 1. 70E-90  | 197. 9256 |
| KLF3-AS1      | -1. 0588  | 1. 893795 | -14. 4896 | 7. 21E-37  | 4. 08E-36  | 71. 02603 |
| KLF3          | 1. 567234 | 3. 848727 | 22. 2998  | 6. 18E-67  | 7. 00E-66  | 140. 2592 |
| FAM114A1      | 2. 019787 | 3. 74715  | 31. 04973 | 3. 38E-98  | 1. 29E-96  | 212. 3601 |
| TMEM156       | 1. 218901 | 0. 787587 | 18. 26395 | 1. 95E-51  | 1. 49E-50  | 104. 5508 |
| KLHL5         | 1. 996856 | 2. 836993 | 25. 20276 | 9. 89E-78  | 1. 58E-76  | 165. 1502 |
| UGDH          | 1. 018547 | 4. 172508 | 11. 43651 | 1. 36E-25  | 6. 11E-25  | 45. 13696 |
| UBE2K         | 1. 919317 | 4. 390901 | 30. 41197 | 4. 70E-96  | 1. 60E-94  | 207. 4155 |
| PDS5A         | 1. 130947 | 3. 483699 | 20. 1587  | 9. 19E-59  | 8. 36E-58  | 121. 4256 |
| RHOH          | 2. 11982  | 1. 414003 | 23. 75916 | 2. 08E-72  | 2. 77E-71  | 152. 8784 |
| RBM47         | 1. 299122 | 3. 976872 | 19. 44669 | 5. 12E-56  | 4. 37E-55  | 115. 0997 |
| APBB2         | 1. 620781 | 2. 932809 | 23. 64022 | 5. 76E-72  | 7. 54E-71  | 151. 8576 |
| UCHL1         | 1. 743086 | 3. 849951 | 15. 97148 | 1. 49E-42  | 9. 47E-42  | 84. 10006 |
| LIMCH1        | 1. 378005 | 2. 337463 | 19. 91126 | 8. 25E-58  | 7. 34E-57  | 119. 23   |
| TMEM33        | 2. 133554 | 3. 238328 | 33. 77043 | 4. 31E-107 | 2. 72E-105 | 232. 8822 |
| SLC30A9       | 1. 319705 | 3. 735029 | 22. 0241  | 6. 84E-66  | 7. 53E-65  | 137. 8535 |
| GNPDA2        | 1. 417653 | 2. 38996  | 27. 3662  | 1. 63E-85  | 3. 38E-84  | 183. 1023 |
| RAC1P2        | 1. 849178 | 2. 031276 | 20. 94805 | 8. 59E-62  | 8. 46E-61  | 128. 4064 |
| COMMD8        | 1. 369314 | 2. 802728 | 25. 9146  | 2. 56E-80  | 4. 42E-79  | 171. 1171 |
| ATP10D        | 1. 049618 | 2. 277374 | 16. 79306 | 9. 89E-46  | 6. 71E-45  | 91. 41423 |
| CORIN         | 1. 714984 | 1. 070206 | 23. 66669 | 4. 59E-72  | 6. 03E-71  | 152. 0849 |
| SLAIN2        | 1. 732507 | 3. 528019 | 23. 93286 | 4. 70E-73  | 6. 39E-72  | 154. 3666 |
| FRYL          | 1. 223949 | 3. 234776 | 20. 59651 | 1. 91E-60  | 1. 82E-59  | 125. 3021 |
| OCIAD1        | 1. 496336 | 5. 892406 | 22. 58367 | 5. 24E-68  | 6. 13E-67  | 142. 7293 |
| OCIAD2        | 3. 904281 | 5. 767723 | 49. 36219 | 5. 89E-151 | 8. 69E-148 | 334. 12   |
| LRRC66        | 1. 438029 | 0. 872738 | 17. 41209 | 3. 93E-48  | 2. 80E-47  | 96. 94027 |
| SGCB          | 2. 288367 | 2. 784215 | 34. 77122 | 2. 90E-110 | 2. 20E-108 | 240. 2004 |
| SPATA18       | 1. 109328 | 1. 421614 | 18. 97157 | 3. 52E-54  | 2. 87E-53  | 110. 8667 |
| RASL11B       | 1. 640801 | 1. 364854 | 22. 68378 | 2. 20E-68  | 2. 60E-67  | 143. 5987 |
| SCFD2         | 1. 156022 | 2. 233885 | 23. 9557  | 3. 86E-73  | 5. 27E-72  | 154. 5621 |
| FIP1L1        | 1. 26096  | 4. 26098  | 16. 24925 | 1. 26E-43  | 8. 18E-43  | 86. 56941 |
| CHIC2         | 2. 164101 | 3. 236114 | 37. 47564 | 1. 43E-118 | 1. 86E-116 | 259. 3707 |
| PDGFRA        | 1. 577237 | 3. 338028 | 14. 99715 | 8. 33E-39  | 4. 90E-38  | 75. 48098 |
| KIT           | 1. 308293 | 1. 394672 | 17. 63102 | 5. 56E-49  | 4. 03E-48  | 98. 89611 |
| SRD5A3        | 2. 533671 | 4. 258997 | 34. 15637 | 2. 54E-108 | 1. 72E-106 | 235. 719  |
| TMEM165       | 1. 251896 | 5. 321714 | 16. 96777 | 2. 08E-46  | 1. 43E-45  | 92. 97302 |
| CLOCK         | 1. 235232 | 2. 072438 | 24. 24883 | 3. 17E-74  | 4. 50E-73  | 157. 0658 |
| NMU           | 3. 590631 | 1. 780895 | 32. 08943 | 1. 21E-101 | 5. 51E-100 | 220. 3116 |
| EXOC1         | 1. 26657  | 3. 51453  | 21. 43488 | 1. 19E-63  | 1. 23E-62  | 132. 6913 |

|              |           |           |           |            |            |           |
|--------------|-----------|-----------|-----------|------------|------------|-----------|
| KIAA1211     | 2. 138532 | 1. 24343  | 26. 87294 | 9. 22E-84  | 1. 80E-82  | 179. 0577 |
| PAICS        | 1. 737865 | 4. 091831 | 24. 87173 | 1. 61E-76  | 2. 47E-75  | 162. 356  |
| HOPX         | 4. 460644 | 3. 636447 | 43. 36477 | 2. 10E-135 | 9. 41E-133 | 298. 2233 |
| REST         | 1. 186727 | 2. 23892  | 24. 08795 | 1. 25E-73  | 1. 73E-72  | 155. 6928 |
| IGFBP7       | 3. 077573 | 8. 010407 | 28. 06321 | 5. 69E-88  | 1. 31E-86  | 188. 7674 |
| UBA6         | 1. 30037  | 2. 554221 | 19. 09779 | 1. 14E-54  | 9. 45E-54  | 111. 992  |
| SULT1B1      | 2. 189146 | 1. 153035 | 18. 98071 | 3. 25E-54  | 2. 65E-53  | 110. 9482 |
| SULT1E1      | 1. 644547 | 0. 84789  | 14. 71527 | 9. 95E-38  | 5. 75E-37  | 73. 00342 |
| ODAM         | 2. 472805 | 1. 472145 | 21. 37206 | 2. 06E-63  | 2. 12E-62  | 132. 1393 |
| FDCSP        | 3. 458153 | 1. 818929 | 18. 48603 | 2. 68E-52  | 2. 09E-51  | 106. 534  |
| JCHAIN       | 4. 584062 | 3. 995507 | 23. 94478 | 4. 24E-73  | 5. 78E-72  | 154. 4687 |
| UTP3         | 1. 639351 | 3. 447703 | 29. 85917 | 3. 53E-94  | 1. 10E-92  | 203. 0884 |
| GRSF1        | 1. 117161 | 5. 076996 | 16. 94431 | 2. 56E-46  | 1. 76E-45  | 92. 76364 |
| MOB1B        | 1. 129954 | 2. 055813 | 20. 22835 | 4. 96E-59  | 4. 54E-58  | 122. 043  |
| DCK          | 1. 928011 | 2. 441003 | 30. 82585 | 1. 90E-97  | 6. 96E-96  | 210. 6302 |
| SLC4A4       | -1. 32071 | 4. 623488 | -9. 12536 | 8. 50E-18  | 3. 22E-17  | 27. 29475 |
| ALB          | -5. 28705 | 5. 375203 | -29. 0001 | 3. 13E-91  | 8. 48E-90  | 196. 2879 |
| RASSF6       | 1. 15423  | 2. 4645   | 14. 46459 | 8. 97E-37  | 5. 07E-36  | 70. 80755 |
| CXCL8        | 3. 217889 | 3. 035603 | 20. 89298 | 1. 40E-61  | 1. 37E-60  | 127. 9206 |
| CXCL6        | 1. 900889 | 2. 165076 | 13. 48889 | 4. 33E-33  | 2. 28E-32  | 62. 34212 |
| CXCL1        | 1. 674072 | 3. 342435 | 11. 48205 | 9. 36E-26  | 4. 23E-25  | 45. 50718 |
| PF4          | 1. 239997 | 0. 671599 | 18. 24959 | 2. 21E-51  | 1. 69E-50  | 104. 4225 |
| CXCL5        | 4. 632995 | 2. 437918 | 27. 60508 | 2. 33E-86  | 5. 01E-85  | 185. 0506 |
| CXCL3        | 2. 269081 | 1. 994097 | 19. 57407 | 1. 65E-56  | 1. 42E-55  | 116. 2331 |
| EREG         | 1. 478543 | 0. 791516 | 14. 55678 | 4. 00E-37  | 2. 28E-36  | 71. 61418 |
| AREG         | 3. 849234 | 2. 692096 | 30. 72177 | 4. 24E-97  | 1. 52E-95  | 209. 8238 |
| RP11-44F21.5 | 1. 580549 | 0. 967147 | 19. 64362 | 8. 89E-57  | 7. 72E-56  | 116. 8517 |
| G3BP2        | 1. 96671  | 4. 348138 | 27. 79555 | 4. 96E-87  | 1. 09E-85  | 186. 5989 |
| NAAA         | 1. 980667 | 2. 989504 | 29. 86818 | 3. 29E-94  | 1. 03E-92  | 203. 1593 |
| CXCL9        | 2. 666624 | 1. 511732 | 22. 09069 | 3. 82E-66  | 4. 24E-65  | 138. 4351 |
| CXCL10       | 2. 696897 | 1. 620285 | 23. 03409 | 1. 06E-69  | 1. 30E-68  | 146. 6338 |
| SCARB2       | 1. 434938 | 5. 287387 | 20. 73161 | 5. 79E-61  | 5. 59E-60  | 126. 4961 |
| FAM47E-STBD1 | 1. 511785 | 2. 206827 | 24. 87607 | 1. 55E-76  | 2. 38E-75  | 162. 3927 |
| SHROOM3      | 2. 659043 | 2. 834884 | 32. 65708 | 1. 68E-103 | 8. 62E-102 | 224. 5958 |
| 11-Sep       | 2. 398719 | 4. 101131 | 29. 76967 | 7. 12E-94  | 2. 18E-92  | 202. 3843 |
| CCNI         | 1. 432949 | 6. 476458 | 18. 19286 | 3. 67E-51  | 2. 79E-50  | 103. 9158 |
| CCNG2        | 1. 902935 | 3. 304983 | 20. 9969  | 5. 59E-62  | 5. 53E-61  | 128. 8371 |
| CXCL13       | 2. 440985 | 1. 303733 | 15. 03408 | 6. 01E-39  | 3. 55E-38  | 75. 80614 |
| CNOT6L       | 1. 067692 | 2. 434431 | 17. 9688  | 2. 72E-50  | 2. 03E-49  | 101. 9141 |
| MRPL1        | 1. 40586  | 3. 514393 | 27. 82961 | 3. 76E-87  | 8. 36E-86  | 186. 8754 |
| ANXA3        | 2. 727851 | 5. 125634 | 28. 99523 | 3. 25E-91  | 8. 80E-90  | 196. 2494 |
| LINC01094    | 1. 410729 | 0. 883216 | 24. 81882 | 2. 52E-76  | 3. 83E-75  | 161. 9083 |
| BMP2K        | 1. 350754 | 2. 372334 | 23. 66367 | 4. 71E-72  | 6. 18E-71  | 152. 0589 |
| PAQR3        | 1. 087865 | 1. 807417 | 21. 852   | 3. 08E-65  | 3. 33E-64  | 136. 3485 |
| ANTXR2       | 3. 204291 | 3. 800036 | 28. 8745  | 8. 50E-91  | 2. 25E-89  | 195. 2862 |
| PRDM8        | 1. 227845 | 1. 142477 | 20. 81612 | 2. 75E-61  | 2. 67E-60  | 127. 2423 |
| RASGEF1B     | 2. 184172 | 1. 80646  | 37. 97712 | 4. 54E-120 | 6. 35E-118 | 262. 8304 |
| RP11-689K5.5 | 1. 651388 | 0. 973156 | 21. 59341 | 2. 96E-64  | 3. 11E-63  | 134. 0828 |
| HNRNP        | 1. 132164 | 6. 778744 | 15. 63809 | 2. 88E-41  | 1. 78E-40  | 81. 14252 |
| ENOPH1       | 1. 683235 | 3. 822293 | 32. 00323 | 2. 32E-101 | 1. 04E-99  | 219. 6574 |
| LIN54        | 1. 111624 | 1. 391126 | 27. 14277 | 1. 01E-84  | 2. 04E-83  | 181. 2739 |
| COPS4        | 1. 208328 | 3. 809756 | 22. 62764 | 3. 58E-68  | 4. 21E-67  | 143. 1113 |
| PLAC8        | 5. 305344 | 3. 261259 | 41. 99047 | 1. 27E-131 | 4. 26E-129 | 289. 4942 |
| COQ2         | 1. 426329 | 2. 273427 | 29. 72388 | 1. 02E-93  | 3. 10E-92  | 202. 0236 |

|          |           |           |           |            |            |           |
|----------|-----------|-----------|-----------|------------|------------|-----------|
| HPSE     | 1. 850799 | 1. 158464 | 34. 58868 | 1. 09E-109 | 8. 07E-108 | 238. 8748 |
| MRPS18C  | 1. 552787 | 4. 153635 | 29. 32551 | 2. 36E-92  | 6. 72E-91  | 198. 8749 |
| AGPAT9   | 1. 517827 | 1. 29194  | 23. 88862 | 6. 86E-73  | 9. 28E-72  | 153. 9879 |
| CDS1     | 2. 090073 | 2. 35468  | 31. 79621 | 1. 12E-100 | 4. 84E-99  | 218. 0828 |
| TECRP1   | 1. 869254 | 1. 708564 | 31. 80866 | 1. 02E-100 | 4. 41E-99  | 218. 1776 |
| HSD17B11 | 1. 616908 | 5. 332799 | 17. 09954 | 6. 41E-47  | 4. 46E-46  | 94. 1491  |
| SPARCL1  | 1. 644087 | 5. 820618 | 14. 28631 | 4. 27E-36  | 2. 37E-35  | 69. 25056 |
| SPP1     | 2. 834009 | 7. 434534 | 15. 04292 | 5. 56E-39  | 3. 29E-38  | 75. 88405 |
| PKD2     | 1. 135232 | 3. 152695 | 13. 41362 | 8. 28E-33  | 4. 33E-32  | 61. 69522 |
| HERC6    | 1. 452001 | 2. 42369  | 14. 33894 | 2. 69E-36  | 1. 51E-35  | 69. 70981 |
| HERC3    | 1. 141043 | 4. 402622 | 12. 05448 | 8. 32E-28  | 3. 93E-27  | 50. 21121 |
| PIGY     | 2. 496204 | 2. 223466 | 16. 99262 | 1. 67E-46  | 1. 15E-45  | 93. 19474 |
| NAP1L5   | 1. 06742  | 1. 336101 | 19. 33557 | 1. 38E-55  | 1. 16E-54  | 114. 1104 |
| TIGD2    | 1. 122175 | 1. 713499 | 26. 51614 | 1. 74E-82  | 3. 25E-81  | 176. 114  |
| SNCA     | 1. 759577 | 1. 714374 | 20. 17869 | 7. 70E-59  | 7. 02E-58  | 121. 6029 |
| TMSB4XP8 | 2. 4522   | 2. 165272 | 12. 66665 | 4. 88E-30  | 2. 40E-29  | 55. 3342  |
| HPGDS    | 1. 688642 | 1. 165158 | 25. 24707 | 6. 82E-78  | 1. 09E-76  | 165. 5233 |
| PDLIM5   | 2. 114673 | 4. 045101 | 31. 54699 | 7. 46E-100 | 3. 08E-98  | 216. 18   |
| TSPAN5   | 2. 464906 | 1. 789491 | 34. 97442 | 6. 69E-111 | 5. 35E-109 | 241. 6713 |
| EIF4E    | 1. 973008 | 4. 065867 | 27. 13776 | 1. 05E-84  | 2. 12E-83  | 181. 2328 |
| METAP1   | 1. 236513 | 3. 760429 | 21. 31026 | 3. 55E-63  | 3. 63E-62  | 131. 596  |
| ADH5     | 1. 772687 | 5. 359016 | 25. 23714 | 7. 41E-78  | 1. 19E-76  | 165. 4397 |
| ADH6     | 1. 092178 | 0. 7871   | 16. 03668 | 8. 35E-43  | 5. 33E-42  | 84. 67929 |
| ADH1C    | 1. 832299 | 3. 350826 | 12. 26001 | 1. 50E-28  | 7. 17E-28  | 51. 92121 |
| DAPP1    | 2. 778553 | 1. 541294 | 42. 32672 | 1. 48E-132 | 5. 30E-130 | 291. 6483 |
| LAMTOR3  | 1. 707458 | 4. 289472 | 28. 61525 | 6. 74E-90  | 1. 71E-88  | 193. 2119 |
| DNAJB14  | 1. 246085 | 2. 580763 | 21. 05758 | 3. 27E-62  | 3. 26E-61  | 129. 3718 |
| H2AFZ    | 2. 3229   | 6. 14156  | 32. 94876 | 1. 90E-104 | 1. 02E-102 | 226. 7816 |
| EMCN     | 1. 327826 | 2. 015151 | 15. 74493 | 1. 11E-41  | 6. 95E-41  | 82. 08953 |
| PPP3CA   | 2. 30277  | 3. 076696 | 37. 58903 | 6. 54E-119 | 8. 61E-117 | 260. 1555 |
| FLJ20021 | 1. 485113 | 3. 044664 | 20. 83537 | 2. 32E-61  | 2. 26E-60  | 127. 4122 |
| BANK1    | 1. 958084 | 1. 274726 | 24. 35875 | 1. 24E-74  | 1. 79E-73  | 158. 0024 |
| NFKB1    | 1. 720955 | 3. 623684 | 26. 7877  | 1. 86E-83  | 3. 59E-82  | 178. 3559 |
| MANBA    | 1. 503017 | 3. 199852 | 24. 26978 | 2. 65E-74  | 3. 77E-73  | 157. 2445 |
| UBE2D3   | 1. 325698 | 6. 454521 | 17. 54066 | 1. 25E-48  | 8. 97E-48  | 98. 08882 |
| CISD2    | 1. 342882 | 3. 676991 | 23. 73278 | 2. 60E-72  | 3. 46E-71  | 152. 6521 |
| SLC9B2   | 2. 79186  | 2. 417893 | 29. 47234 | 7. 41E-93  | 2. 15E-91  | 200. 0378 |
| BDH2     | 1. 543032 | 4. 484914 | 22. 34189 | 4. 29E-67  | 4. 89E-66  | 140. 6258 |
| CENPE    | 1. 100974 | 0. 628076 | 28. 52821 | 1. 35E-89  | 3. 36E-88  | 192. 5137 |
| PPA2     | 1. 34826  | 5. 21603  | 22. 31541 | 5. 40E-67  | 6. 13E-66  | 140. 3951 |
| EEF1A1P9 | 1. 178417 | 0. 809188 | 35. 66783 | 4. 64E-113 | 4. 22E-111 | 246. 653  |
| INTS12   | 1. 313102 | 3. 069596 | 27. 56275 | 3. 28E-86  | 7. 02E-85  | 184. 7058 |
| GSTCD    | 1. 011821 | 1. 173659 | 24. 77251 | 3. 73E-76  | 5. 63E-75  | 161. 5162 |
| NPNT     | 1. 471595 | 4. 240519 | 15. 6198  | 3. 38E-41  | 2. 09E-40  | 80. 98049 |
| AIMP1    | 1. 228131 | 4. 195681 | 20. 6465  | 1. 23E-60  | 1. 18E-59  | 125. 7441 |
| DKK2     | 1. 149119 | 0. 618804 | 21. 99212 | 9. 04E-66  | 9. 92E-65  | 137. 574  |
| SGMS2    | 1. 902974 | 2. 661461 | 24. 36013 | 1. 23E-74  | 1. 77E-73  | 158. 0141 |
| CYP2U1   | 1. 085654 | 1. 30273  | 19. 05472 | 1. 68E-54  | 1. 38E-53  | 111. 6081 |
| HADH     | 1. 038815 | 4. 542959 | 14. 91925 | 1. 65E-38  | 9. 69E-38  | 74. 79539 |
| LEF1     | 3. 694218 | 2. 261221 | 45. 5744  | 2. 61E-141 | 1. 90E-138 | 311. 8526 |
| LEF1-AS1 | 1. 172338 | 0. 634519 | 27. 94108 | 1. 53E-87  | 3. 44E-86  | 187. 779  |
| OSTC     | 1. 162347 | 6. 111393 | 16. 70329 | 2. 20E-45  | 1. 49E-44  | 90. 61369 |
| CCDC109B | 2. 749548 | 2. 278176 | 44. 6604  | 6. 82E-139 | 3. 93E-136 | 306. 2743 |
| CASP6    | 1. 154939 | 3. 661581 | 18. 82489 | 1. 30E-53  | 1. 05E-52  | 109. 5585 |

|            |           |           |           |            |            |           |
|------------|-----------|-----------|-----------|------------|------------|-----------|
| CFI        | 1. 881385 | 4. 738197 | 19. 39746 | 7. 93E-56  | 6. 73E-55  | 114. 6615 |
| GAR1       | 1. 696184 | 3. 520022 | 32. 02042 | 2. 04E-101 | 9. 21E-100 | 219. 7879 |
| EGF        | -3. 16616 | 2. 506387 | -34. 3876 | 4. 70E-109 | 3. 36E-107 | 237. 4095 |
| ELOVL6     | 2. 354803 | 2. 015623 | 27. 92943 | 1. 68E-87  | 3. 77E-86  | 187. 6847 |
| ENPEP      | 1. 044051 | 1. 320107 | 15. 0225  | 6. 66E-39  | 3. 93E-38  | 75. 70414 |
| APIAR      | 1. 334708 | 2. 647069 | 22. 35245 | 3. 91E-67  | 4. 46E-66  | 140. 7178 |
| LARP7      | 1. 375283 | 3. 931278 | 23. 86462 | 8. 42E-73  | 1. 14E-71  | 153. 7823 |
| RPL7AP30   | 1. 054977 | 1. 64555  | 25. 49564 | 8. 47E-79  | 1. 39E-77  | 167. 6122 |
| ANK2       | 1. 416016 | 1. 271832 | 15. 71965 | 1. 40E-41  | 8. 68E-41  | 81. 86539 |
| CAMK2D     | 1. 886034 | 3. 054981 | 26. 82596 | 1. 36E-83  | 2. 63E-82  | 178. 671  |
| ARSJ       | 1. 074595 | 1. 099035 | 18. 86738 | 8. 92E-54  | 7. 20E-53  | 109. 9375 |
| UGT8       | 1. 580701 | 2. 260866 | 21. 4283  | 1. 26E-63  | 1. 30E-62  | 132. 6335 |
| METTL14    | 1. 222097 | 2. 771505 | 19. 03045 | 2. 08E-54  | 1. 71E-53  | 111. 3917 |
| SYNPO2     | 1. 350307 | 1. 873094 | 13. 07315 | 1. 54E-31  | 7. 82E-31  | 58. 78227 |
| C4orf3     | 2. 256196 | 5. 217776 | 32. 49954 | 5. 48E-103 | 2. 72E-101 | 223. 4108 |
| MAD2L1     | 2. 566728 | 1. 793238 | 40. 87236 | 1. 76E-128 | 4. 31E-126 | 282. 2445 |
| NDNF       | 1. 84051  | 1. 024483 | 22. 98225 | 1. 66E-69  | 2. 03E-68  | 146. 1853 |
| ANXA5      | 2. 405255 | 7. 230957 | 27. 98753 | 1. 05E-87  | 2. 38E-86  | 188. 1551 |
| EXOSC9     | 1. 303569 | 3. 35937  | 26. 85771 | 1. 05E-83  | 2. 04E-82  | 178. 9324 |
| CCNA2      | 2. 097582 | 1. 550162 | 34. 49426 | 2. 16E-109 | 1. 58E-107 | 238. 1874 |
| BBS7       | 1. 320391 | 2. 101059 | 27. 30602 | 2. 66E-85  | 5. 49E-84  | 182. 6105 |
| BBS12      | 1. 112227 | 1. 164586 | 28. 93962 | 5. 06E-91  | 1. 35E-89  | 195. 8059 |
| FGF2       | 1. 265001 | 0. 930159 | 17. 25582 | 1. 59E-47  | 1. 12E-46  | 95. 54457 |
| SPRY1      | 1. 639596 | 4. 237908 | 16. 14681 | 3. 13E-43  | 2. 02E-42  | 85. 65819 |
| ANKRD50    | 1. 75016  | 1. 75387  | 28. 54501 | 1. 18E-89  | 2. 95E-88  | 192. 6486 |
| PLK4       | 1. 481068 | 1. 110922 | 32. 18451 | 5. 89E-102 | 2. 74E-100 | 221. 032  |
| C4orf33    | 1. 204507 | 2. 748191 | 20. 48669 | 5. 04E-60  | 4. 74E-59  | 124. 3309 |
| PCDH18     | 1. 76637  | 1. 577971 | 23. 5739  | 1. 02E-71  | 1. 32E-70  | 151. 2878 |
| CCRN4L     | 1. 121822 | 1. 374002 | 20. 80561 | 3. 02E-61  | 2. 93E-60  | 127. 1495 |
| PPP1R14BP3 | 1. 853006 | 2. 203731 | 26. 90052 | 7. 35E-84  | 1. 44E-82  | 179. 2847 |
| NDUFC1     | 1. 539744 | 5. 347329 | 24. 86769 | 1. 67E-76  | 2. 55E-75  | 162. 3218 |
| NAA15      | 1. 37351  | 2. 396843 | 26. 7945  | 1. 76E-83  | 3. 40E-82  | 178. 4119 |
| SETD7      | 1. 310951 | 3. 175943 | 20. 09988 | 1. 55E-58  | 1. 40E-57  | 120. 9039 |
| MGST2      | 2. 283369 | 5. 524579 | 32. 44863 | 8. 04E-103 | 3. 93E-101 | 223. 0272 |
| SCOC       | 1. 476971 | 4. 76937  | 20. 16861 | 8. 42E-59  | 7. 67E-58  | 121. 5134 |
| TBC1D9     | 1. 31953  | 2. 466316 | 19. 26036 | 2. 69E-55  | 2. 26E-54  | 113. 4405 |
| IL15       | 1. 447212 | 1. 743501 | 25. 57498 | 4. 36E-79  | 7. 26E-78  | 168. 2775 |
| INPP4B     | 2. 945179 | 2. 260418 | 37. 44727 | 1. 74E-118 | 2. 24E-116 | 259. 1741 |
| USP38      | 1. 323322 | 2. 014232 | 27. 82648 | 3. 86E-87  | 8. 57E-86  | 186. 85   |
| SMARCA5    | 1. 306557 | 3. 76639  | 20. 61478 | 1. 63E-60  | 1. 55E-59  | 125. 4637 |
| ANAPC10    | 1. 34284  | 2. 968429 | 27. 1433  | 1. 00E-84  | 2. 03E-83  | 181. 2782 |
| SMAD1      | 1. 159128 | 2. 780757 | 16. 9965  | 1. 61E-46  | 1. 11E-45  | 93. 22939 |
| MMAA       | 1. 305415 | 2. 181063 | 26. 44532 | 3. 13E-82  | 5. 78E-81  | 175. 5279 |
| ZNF827     | 1. 11077  | 1. 822944 | 20. 5732  | 2. 35E-60  | 2. 23E-59  | 125. 0961 |
| LSM6       | 1. 567483 | 4. 041307 | 26. 72927 | 3. 01E-83  | 5. 77E-82  | 177. 8743 |
| EDNRA      | 3. 054087 | 1. 971391 | 37. 81941 | 1. 34E-119 | 1. 82E-117 | 261. 7455 |
| LRBA       | 1. 404242 | 3. 641047 | 23. 4316  | 3. 45E-71  | 4. 43E-70  | 150. 0637 |
| MAB21L2    | 1. 012017 | 0. 58212  | 10. 79847 | 2. 33E-23  | 9. 97E-23  | 40. 01663 |
| SH3D19     | 1. 803256 | 3. 619234 | 24. 81696 | 2. 56E-76  | 3. 89E-75  | 161. 8925 |
| GATB       | 1. 271113 | 2. 706098 | 29. 18323 | 7. 30E-92  | 2. 03E-90  | 197. 7455 |
| TMEM154    | 1. 707554 | 0. 970396 | 30. 06014 | 7. 30E-95  | 2. 35E-93  | 204. 666  |
| ARFIP1     | 2. 117466 | 3. 324946 | 37. 14457 | 1. 42E-117 | 1. 72E-115 | 257. 0706 |
| FHDC1      | 1. 370497 | 1. 184893 | 26. 2914  | 1. 12E-81  | 2. 03E-80  | 174. 252  |
| TRIM2      | 1. 21704  | 3. 064986 | 17. 53734 | 1. 28E-48  | 9. 24E-48  | 98. 05918 |



|             |           |           |           |            |            |           |
|-------------|-----------|-----------|-----------|------------|------------|-----------|
| MND1        | 1. 774854 | 1. 0304   | 38. 80354 | 1. 64E-122 | 2. 71E-120 | 268. 4685 |
| KIAA0922    | -1. 11917 | 2. 981281 | -14. 0327 | 3. 90E-35  | 2. 13E-34  | 67. 043   |
| TLR2        | 1. 363952 | 2. 047975 | 18. 31377 | 1. 25E-51  | 9. 59E-51  | 104. 9958 |
| SFRP2       | 5. 411857 | 5. 565534 | 34. 41514 | 3. 85E-109 | 2. 75E-107 | 237. 6107 |
| PLRG1       | 1. 114851 | 4. 440348 | 19. 99556 | 3. 90E-58  | 3. 50E-57  | 119. 9783 |
| FGA         | 1. 229132 | 2. 484737 | 5. 994398 | 5. 55E-09  | 1. 64E-08  | 7. 279132 |
| FGG         | 1. 206322 | 2. 126875 | 5. 870869 | 1. 09E-08  | 3. 19E-08  | 6. 61739  |
| GUCY1A3     | 1. 411196 | 2. 363637 | 17. 45173 | 2. 76E-48  | 1. 97E-47  | 97. 29438 |
| P11-588K22. | 1. 30333  | 2. 245176 | 16. 7283  | 1. 76E-45  | 1. 19E-44  | 90. 83673 |
| GUCY1B3     | 1. 317769 | 2. 451312 | 17. 9249  | 4. 02E-50  | 2. 99E-49  | 101. 5219 |
| TD02        | 1. 825328 | 1. 105467 | 25. 54508 | 5. 60E-79  | 9. 28E-78  | 168. 0268 |
| CTSO        | 1. 976463 | 3. 431765 | 26. 35587 | 6. 56E-82  | 1. 20E-80  | 174. 7868 |
| PDGFC       | 2. 229331 | 3. 532854 | 25. 1307  | 1. 81E-77  | 2. 86E-76  | 164. 543  |
| FAM198B     | 2. 603479 | 2. 973703 | 28. 93476 | 5. 26E-91  | 1. 41E-89  | 195. 7672 |
| TMEM144     | 1. 105687 | 2. 312942 | 18. 81896 | 1. 37E-53  | 1. 10E-52  | 109. 5056 |
| FNIP2       | 1. 340231 | 2. 699076 | 19. 13158 | 8. 46E-55  | 7. 02E-54  | 112. 2931 |
| NPY1R       | -1. 20108 | 1. 943483 | -12. 0174 | 1. 13E-27  | 5. 34E-27  | 49. 90379 |
| TMA16       | 1. 023542 | 3. 299886 | 17. 40969 | 4. 02E-48  | 2. 86E-47  | 96. 91888 |
| LINC01207   | 1. 196542 | 1. 185235 | 10. 71453 | 4. 54E-23  | 1. 93E-22  | 39. 35289 |
| KLHL2       | 1. 466119 | 2. 776085 | 24. 03701 | 1. 93E-73  | 2. 66E-72  | 155. 2575 |
| MSM01       | 2. 505833 | 4. 283845 | 27. 82099 | 4. 04E-87  | 8. 94E-86  | 186. 8055 |
| CPE         | 1. 683941 | 5. 291338 | 13. 44527 | 6. 31E-33  | 3. 31E-32  | 61. 96711 |
| ANXA10      | 2. 831113 | 4. 131575 | 13. 83313 | 2. 21E-34  | 1. 19E-33  | 65. 3125  |
| DDX60       | 2. 884707 | 2. 624226 | 33. 90805 | 1. 57E-107 | 1. 01E-105 | 233. 8958 |
| DDX60L      | 1. 724519 | 2. 571002 | 26. 09234 | 5. 83E-81  | 1. 03E-79  | 172. 598  |
| PALLD       | 3. 703467 | 4. 490493 | 34. 12282 | 3. 25E-108 | 2. 19E-106 | 235. 4731 |
| SH3RF1      | 2. 057687 | 2. 736515 | 30. 07937 | 6. 28E-95  | 2. 03E-93  | 204. 8167 |
| NEK1        | 1. 010983 | 1. 550109 | 20. 42101 | 9. 01E-60  | 8. 41E-59  | 123. 7496 |
| CLCN3       | 1. 406396 | 3. 849415 | 20. 0511  | 2. 39E-58  | 2. 15E-57  | 120. 4712 |
| C4orf27     | 1. 190481 | 3. 38473  | 24. 1091  | 1. 04E-73  | 1. 45E-72  | 155. 8735 |
| GALNT7      | 1. 105176 | 3. 599658 | 14. 61316 | 2. 44E-37  | 1. 40E-36  | 72. 10807 |
| HMGB2       | 2. 726651 | 4. 835918 | 33. 76035 | 4. 64E-107 | 2. 92E-105 | 232. 8079 |
| SAP30       | 1. 642052 | 2. 713242 | 25. 83157 | 5. 11E-80  | 8. 76E-79  | 170. 4241 |
| HAND2       | 1. 448492 | 2. 954847 | 14. 63489 | 2. 02E-37  | 1. 16E-36  | 72. 29846 |
| FBX08       | 1. 433986 | 3. 243932 | 25. 00805 | 5. 10E-77  | 7. 90E-76  | 163. 5081 |
| HPGD        | 3. 928541 | 2. 371721 | 34. 05429 | 5. 36E-108 | 3. 57E-106 | 234. 9704 |
| VEGFC       | 2. 105761 | 1. 709422 | 30. 75175 | 3. 37E-97  | 1. 21E-95  | 210. 0562 |
| AGA         | 1. 337487 | 3. 195585 | 23. 66867 | 4. 51E-72  | 5. 93E-71  | 152. 1019 |
| TENM3       | 1. 357844 | 1. 24171  | 19. 72617 | 4. 27E-57  | 3. 74E-56  | 117. 5856 |
| DCTD        | 1. 47997  | 5. 102764 | 23. 55441 | 1. 20E-71  | 1. 56E-70  | 151. 1202 |
| CDKN2AIP    | 1. 190453 | 2. 939762 | 20. 20434 | 6. 14E-59  | 5. 60E-58  | 121. 8302 |
| ING2        | 1. 124682 | 3. 110437 | 21. 31333 | 3. 45E-63  | 3. 53E-62  | 131. 623  |
| IRF2        | 1. 909872 | 3. 592132 | 29. 55856 | 3. 75E-93  | 1. 11E-91  | 200. 7193 |
| CASP3       | 1. 97618  | 3. 183291 | 35. 36439 | 4. 06E-112 | 3. 48E-110 | 244. 4802 |
| CENPU       | 2. 177901 | 1. 818618 | 34. 30076 | 8. 85E-109 | 6. 22E-107 | 236. 7755 |
| ACSL1       | 1. 435851 | 4. 413137 | 16. 6946  | 2. 38E-45  | 1. 60E-44  | 90. 53623 |
| CFAP97      | 1. 280473 | 2. 639005 | 20. 58164 | 2. 18E-60  | 2. 07E-59  | 125. 1707 |
| CCDC110     | -1. 62275 | 1. 599761 | -28. 9455 | 4. 83E-91  | 1. 29E-89  | 195. 8531 |
| PDLIM3      | 2. 470343 | 4. 002046 | 22. 31114 | 5. 60E-67  | 6. 36E-66  | 140. 3579 |
| TLR3        | 1. 3466   | 1. 765836 | 18. 97828 | 3. 32E-54  | 2. 71E-53  | 110. 9266 |
| F11         | -2. 10169 | 2. 77106  | -20. 467  | 6. 00E-60  | 5. 63E-59  | 124. 1567 |
| F11-AS1     | -1. 10157 | 1. 060897 | -21. 9764 | 1. 04E-65  | 1. 14E-64  | 137. 4363 |
| FAT1        | 2. 372848 | 5. 065122 | 28. 98373 | 3. 56E-91  | 9. 62E-90  | 196. 1577 |
| P11-756P10. | 1. 337491 | 2. 149631 | 20. 53789 | 3. 21E-60  | 3. 03E-59  | 124. 7838 |

|             |           |           |           |            |            |           |
|-------------|-----------|-----------|-----------|------------|------------|-----------|
| FRG1        | 1. 073255 | 4. 486876 | 13. 6963  | 7. 22E-34  | 3. 85E-33  | 64. 12946 |
| SDHA        | 1. 559071 | 5. 418035 | 24. 84142 | 2. 08E-76  | 3. 18E-75  | 162. 0996 |
| PDCD6       | 1. 872138 | 5. 714683 | 28. 62482 | 6. 24E-90  | 1. 59E-88  | 193. 2887 |
| PP7080      | 1. 442982 | 3. 725593 | 16. 96942 | 2. 05E-46  | 1. 41E-45  | 92. 98773 |
| SLC9A3      | 1. 626229 | 0. 954748 | 13. 66523 | 9. 45E-34  | 5. 02E-33  | 63. 86132 |
| CEP72       | 1. 095808 | 1. 656773 | 18. 9055  | 6. 35E-54  | 5. 15E-53  | 110. 2775 |
| ZDHHC11B    | -1. 33415 | 2. 034627 | -15. 7352 | 1. 22E-41  | 7. 58E-41  | 82. 00288 |
| TRIP13      | 1. 724508 | 1. 229885 | 30. 14998 | 3. 62E-95  | 1. 18E-93  | 205. 3695 |
| NKD2        | 1. 474528 | 2. 688138 | 15. 66032 | 2. 36E-41  | 1. 46E-40  | 81. 33949 |
| SLC12A7     | 1. 433658 | 4. 381653 | 18. 16338 | 4. 78E-51  | 3. 62E-50  | 103. 6525 |
| CLPTM1L     | 1. 226887 | 6. 071236 | 18. 63954 | 6. 81E-53  | 5. 38E-52  | 107. 9044 |
| LPCAT1      | 1. 781533 | 3. 407183 | 24. 72669 | 5. 49E-76  | 8. 25E-75  | 161. 128  |
| TD-2012J19. | 1. 132061 | 1. 3624   | 5. 378584 | 1. 46E-07  | 4. 07E-07  | 4. 091976 |
| MRPL36      | 1. 372789 | 4. 690788 | 22. 8253  | 6. 46E-69  | 7. 75E-68  | 144. 8262 |
| NDUFS6      | 1. 787622 | 5. 065318 | 28. 20189 | 1. 86E-88  | 4. 37E-87  | 189. 8874 |
| MED10       | 1. 45496  | 4. 167613 | 25. 00396 | 5. 28E-77  | 8. 17E-76  | 163. 4736 |
| SRD5A1      | 1. 43758  | 2. 387016 | 22. 33876 | 4. 41E-67  | 5. 02E-66  | 140. 5985 |
| ADCY2       | 1. 052304 | 0. 845357 | 18. 95342 | 4. 14E-54  | 3. 37E-53  | 110. 7048 |
| SEMA5A      | 1. 148973 | 1. 335898 | 18. 56707 | 1. 30E-52  | 1. 02E-51  | 107. 2576 |
| FAM173B     | 1. 204596 | 2. 304763 | 24. 83964 | 2. 11E-76  | 3. 22E-75  | 162. 0845 |
| CCT5        | 2. 042674 | 5. 961112 | 28. 13071 | 3. 30E-88  | 7. 67E-87  | 189. 3129 |
| CMBL        | 1. 818771 | 3. 675586 | 21. 72003 | 9. 76E-65  | 1. 04E-63  | 135. 1929 |
| CTNND2      | -1. 51338 | 2. 286362 | -18. 4213 | 4. 77E-52  | 3. 71E-51  | 105. 9565 |
| TRIO        | 1. 321488 | 4. 031674 | 17. 29259 | 1. 14E-47  | 8. 07E-47  | 95. 87295 |
| OTULIN      | 1. 053668 | 2. 263656 | 20. 34825 | 1. 72E-59  | 1. 59E-58  | 123. 1053 |
| ANKH        | 2. 227275 | 4. 394174 | 28. 86391 | 9. 25E-91  | 2. 44E-89  | 195. 2016 |
| FBXL7       | 1. 536963 | 1. 527002 | 23. 05571 | 8. 81E-70  | 1. 08E-68  | 146. 8207 |
| BASP1       | 3. 481863 | 2. 761117 | 36. 63709 | 4. 91E-116 | 5. 44E-114 | 253. 5198 |
| CDH6        | 1. 796677 | 1. 216898 | 25. 16773 | 1. 33E-77  | 2. 10E-76  | 164. 8551 |
| DROSHA      | 1. 204601 | 4. 40637  | 17. 95113 | 3. 18E-50  | 2. 37E-49  | 101. 7562 |
| GOLPH3      | 1. 545356 | 4. 907341 | 23. 60261 | 7. 95E-72  | 1. 04E-70  | 151. 5345 |
| ZFR         | 1. 069378 | 4. 053948 | 17. 61093 | 6. 65E-49  | 4. 82E-48  | 98. 71661 |
| SUB1        | 2. 237391 | 6. 274008 | 31. 98465 | 2. 67E-101 | 1. 20E-99  | 219. 5164 |
| NPR3        | 2. 17164  | 1. 345027 | 23. 39325 | 4. 80E-71  | 6. 14E-70  | 149. 7335 |
| TARS        | 1. 407681 | 4. 964608 | 22. 4215  | 2. 15E-67  | 2. 47E-66  | 141. 319  |
| ADAMTS12    | 2. 669179 | 1. 586942 | 31. 81483 | 9. 70E-101 | 4. 22E-99  | 218. 2246 |
| AMACR       | 1. 27015  | 2. 701465 | 19. 69767 | 5. 50E-57  | 4. 80E-56  | 117. 3323 |
| C1QTNF3     | 2. 366986 | 3. 081672 | 21. 57621 | 3. 44E-64  | 3. 61E-63  | 133. 9319 |
| RAI14       | 2. 32617  | 3. 053336 | 32. 16332 | 6. 91E-102 | 3. 20E-100 | 220. 8715 |
| RAD1        | 1. 238591 | 2. 895247 | 25. 59007 | 3. 84E-79  | 6. 41E-78  | 168. 4039 |
| BRIX1       | 1. 97222  | 3. 470236 | 35. 36807 | 3. 95E-112 | 3. 40E-110 | 244. 5066 |
| DNAJC21     | 1. 25028  | 3. 962516 | 22. 51061 | 9. 89E-68  | 1. 15E-66  | 142. 0942 |
| IL7R        | 2. 281176 | 1. 952969 | 19. 78559 | 2. 52E-57  | 2. 22E-56  | 118. 1137 |
| SLC1A3      | 1. 432682 | 1. 935573 | 15. 68862 | 1. 84E-41  | 1. 14E-40  | 81. 59031 |
| NIPBL       | 1. 322226 | 4. 119311 | 23. 19365 | 2. 68E-70  | 3. 36E-69  | 148. 0123 |
| NUP155      | 1. 353911 | 2. 161429 | 30. 44487 | 3. 64E-96  | 1. 25E-94  | 207. 6719 |
| WDR70       | 1. 401438 | 3. 620518 | 26. 4479  | 3. 06E-82  | 5. 67E-81  | 175. 5493 |
| EGFLAM      | 1. 271386 | 1. 416512 | 19. 55279 | 1. 99E-56  | 1. 72E-55  | 116. 0438 |
| OSMR        | 1. 863807 | 3. 583586 | 20. 95327 | 8. 20E-62  | 8. 08E-61  | 128. 4524 |
| FYB         | 2. 251632 | 1. 552789 | 26. 19079 | 2. 57E-81  | 4. 60E-80  | 173. 4167 |
| DAB2        | 1. 429993 | 3. 916724 | 17. 64183 | 5. 05E-49  | 3. 67E-48  | 98. 99267 |
| TTC33       | 1. 117842 | 2. 098439 | 20. 55768 | 2. 69E-60  | 2. 55E-59  | 124. 9588 |
| PRKAA1      | 1. 021063 | 4. 109472 | 13. 53924 | 2. 81E-33  | 1. 48E-32  | 62. 77536 |
| RPL37       | 1. 445736 | 10. 27847 | 14. 51708 | 5. 67E-37  | 3. 22E-36  | 71. 26674 |

|              |           |           |           |            |            |           |
|--------------|-----------|-----------|-----------|------------|------------|-----------|
| CARD6        | 1. 885763 | 2. 057343 | 18. 30855 | 1. 31E-51  | 1. 00E-50  | 104. 9491 |
| OXCT1        | 1. 918055 | 2. 276722 | 29. 13216 | 1. 09E-91  | 3. 03E-90  | 197. 3395 |
| C5orf51      | 1. 207284 | 2. 361116 | 24. 44654 | 5. 90E-75  | 8. 58E-74  | 158. 7495 |
| SEPP1        | 1. 105257 | 5. 756144 | 10. 28874 | 1. 29E-21  | 5. 32E-21  | 36. 02451 |
| ANXA2R       | 1. 514271 | 1. 142724 | 24. 64279 | 1. 12E-75  | 1. 66E-74  | 160. 4165 |
| ZNF131       | 1. 199445 | 3. 288471 | 15. 63218 | 3. 03E-41  | 1. 87E-40  | 81. 0902  |
| HMGCS1       | 1. 250599 | 4. 166155 | 14. 14793 | 1. 43E-35  | 7. 86E-35  | 68. 04493 |
| CCL28        | 1. 310066 | 2. 8794   | 13. 36739 | 1. 23E-32  | 6. 42E-32  | 61. 29845 |
| C5orf28      | 1. 212832 | 2. 392742 | 23. 19506 | 2. 65E-70  | 3. 32E-69  | 148. 0246 |
| PAIP1        | 1. 675003 | 4. 790419 | 27. 89729 | 2. 18E-87  | 4. 87E-86  | 187. 4243 |
| RP11-53019.1 | 1. 205426 | 1. 34273  | 17. 74407 | 2. 02E-49  | 1. 48E-48  | 99. 90617 |
| MRPS30       | 1. 481645 | 3. 590953 | 28. 91711 | 6. 05E-91  | 1. 61E-89  | 195. 6264 |
| EMB          | 3. 398227 | 2. 355797 | 45. 78036 | 7. 54E-142 | 5. 85E-139 | 313. 0983 |
| PARP8        | 1. 655854 | 3. 162462 | 24. 85634 | 1. 83E-76  | 2. 80E-75  | 162. 2258 |
| ITGA1        | 2. 471221 | 2. 580415 | 32. 70249 | 1. 20E-103 | 6. 20E-102 | 224. 9367 |
| PELO         | 1. 977247 | 2. 822829 | 36. 31562 | 4. 71E-115 | 4. 89E-113 | 251. 2548 |
| ITGA2        | 3. 661033 | 2. 289093 | 42. 56316 | 3. 29E-133 | 1. 24E-130 | 293. 1558 |
| FST          | 1. 536224 | 1. 435772 | 15. 63382 | 2. 99E-41  | 1. 85E-40  | 81. 10473 |
| NDUFS4       | 1. 874943 | 5. 036467 | 30. 30604 | 1. 07E-95  | 3. 58E-94  | 206. 5893 |
| ARL15        | 2. 076773 | 2. 502263 | 33. 39072 | 7. 10E-106 | 4. 19E-104 | 230. 0734 |
| SNX18        | 1. 470801 | 2. 220268 | 26. 30884 | 9. 68E-82  | 1. 76E-80  | 174. 3968 |
| ESM1         | 2. 588969 | 1. 489929 | 30. 32023 | 9. 59E-96  | 3. 21E-94  | 206. 7001 |
| GZMK         | 1. 995129 | 1. 23926  | 19. 76484 | 3. 03E-57  | 2. 66E-56  | 117. 9292 |
| GZMA         | 2. 634284 | 1. 720411 | 29. 75915 | 7. 73E-94  | 2. 37E-92  | 202. 3015 |
| GPX8         | 3. 012889 | 3. 109598 | 39. 58103 | 8. 84E-125 | 1. 66E-122 | 273. 7017 |
| PPAP2A       | 1. 374114 | 4. 482554 | 17. 95909 | 2. 96E-50  | 2. 21E-49  | 101. 8273 |
| IL6ST        | 1. 367527 | 3. 827413 | 16. 82131 | 7. 68E-46  | 5. 23E-45  | 91. 66619 |
| GPBP1        | 1. 277177 | 4. 689357 | 21. 28036 | 4. 61E-63  | 4. 71E-62  | 131. 3331 |
| PLK2         | 1. 863294 | 4. 194169 | 19. 37713 | 9. 51E-56  | 8. 04E-55  | 114. 4804 |
| GAPT         | 1. 27921  | 0. 914819 | 16. 93408 | 2. 81E-46  | 1. 93E-45  | 92. 67232 |
| PDE4D        | 1. 658727 | 1. 484904 | 26. 65491 | 5. 55E-83  | 1. 05E-81  | 177. 2607 |
| DEPDC1B      | 1. 617592 | 0. 878114 | 32. 55939 | 3. 50E-103 | 1. 75E-101 | 223. 8613 |
| NDUFAF2      | 1. 125971 | 4. 304311 | 20. 42533 | 8. 67E-60  | 8. 10E-59  | 123. 7878 |
| SMIM15       | 2. 143124 | 3. 955352 | 32. 99848 | 1. 31E-104 | 7. 16E-103 | 227. 1531 |
| KIF2A        | 1. 279239 | 2. 613117 | 19. 6976  | 5. 50E-57  | 4. 80E-56  | 117. 3316 |
| IPO11        | 1. 307959 | 2. 628072 | 27. 68629 | 1. 20E-86  | 2. 62E-85  | 185. 7113 |
| CKS1BP3      | 2. 571959 | 1. 346279 | 31. 04951 | 3. 38E-98  | 1. 29E-96  | 212. 3584 |
| ISCA1P1      | 1. 023985 | 1. 233962 | 13. 2341  | 3. 87E-32  | 2. 00E-31  | 60. 1566  |
| SREK1IP1     | 1. 317253 | 2. 784531 | 23. 77314 | 1. 84E-72  | 2. 46E-71  | 152. 9983 |
| CWC27        | 1. 705468 | 2. 948516 | 33. 12492 | 5. 11E-105 | 2. 85E-103 | 228. 0966 |
| CENPK        | 2. 03081  | 1. 358777 | 35. 93774 | 6. 81E-114 | 6. 62E-112 | 248. 5765 |
| TRAPPC13     | 1. 004947 | 2. 88636  | 20. 98317 | 6. 30E-62  | 6. 23E-61  | 128. 716  |
| SGTB         | 1. 002108 | 1. 033377 | 22. 90727 | 3. 18E-69  | 3. 85E-68  | 145. 5363 |
| NLN          | 1. 235811 | 2. 160635 | 20. 52128 | 3. 71E-60  | 3. 50E-59  | 124. 6368 |
| ERBB2IP      | 1. 448061 | 3. 73542  | 20. 28284 | 3. 06E-59  | 2. 82E-58  | 122. 5259 |
| MAST4        | 1. 220658 | 2. 046316 | 20. 69721 | 7. 85E-61  | 7. 56E-60  | 126. 1922 |
| CD180        | 1. 128676 | 0. 650404 | 19. 82898 | 1. 71E-57  | 1. 51E-56  | 118. 4992 |
| PIK3R1       | 1. 419818 | 2. 74848  | 17. 875   | 6. 28E-50  | 4. 65E-49  | 101. 076  |
| SLC30A5      | 1. 019003 | 4. 367502 | 17. 57878 | 8. 86E-49  | 6. 40E-48  | 98. 42938 |
| CCNB1        | 3. 032837 | 2. 8075   | 42. 24183 | 2. 55E-132 | 8. 90E-130 | 291. 1056 |
| CENPH        | 1. 810528 | 1. 586304 | 37. 13473 | 1. 52E-117 | 1. 83E-115 | 257. 002  |
| MRPS36       | 1. 702179 | 3. 96265  | 29. 52685 | 4. 82E-93  | 1. 41E-91  | 200. 4687 |
| CDK7         | 1. 770183 | 3. 617006 | 31. 19864 | 1. 07E-98  | 4. 18E-97  | 213. 5072 |
| AK6          | 1. 062412 | 4. 379139 | 17. 98657 | 2. 32E-50  | 1. 73E-49  | 102. 0728 |

|            |           |           |           |            |            |           |
|------------|-----------|-----------|-----------|------------|------------|-----------|
| TAF9       | 1. 110711 | 4. 363216 | 18. 55631 | 1. 43E-52  | 1. 12E-51  | 107. 1615 |
| SERF1B     | 1. 381855 | 4. 229782 | 22. 46395 | 1. 48E-67  | 1. 71E-66  | 141. 6884 |
| SMN1       | 1. 015132 | 3. 946454 | 16. 35274 | 5. 01E-44  | 3. 28E-43  | 87. 49041 |
| MCCC2      | 1. 00028  | 4. 015191 | 17. 06662 | 8. 60E-47  | 5. 97E-46  | 93. 85528 |
| MAP1B      | 1. 677419 | 1. 872037 | 20. 74597 | 5. 10E-61  | 4. 94E-60  | 126. 6229 |
| MRPS27     | 1. 063862 | 4. 017268 | 18. 95813 | 3. 97E-54  | 3. 23E-53  | 110. 7468 |
| TNPO1      | 1. 130183 | 3. 545011 | 16. 74945 | 1. 46E-45  | 9. 88E-45  | 91. 02526 |
| FCHO2      | 1. 342517 | 2. 740138 | 14. 79809 | 4. 80E-38  | 2. 79E-37  | 73. 73041 |
| TMEM171    | 2. 336015 | 1. 406987 | 33. 14313 | 4. 46E-105 | 2. 50E-103 | 228. 2322 |
| FOXD1      | 1. 422875 | 0. 722874 | 18. 70922 | 3. 66E-53  | 2. 91E-52  | 108. 5263 |
| FOXD1-AS1  | 1. 517774 | 0. 816865 | 17. 8809  | 5. 96E-50  | 4. 42E-49  | 101. 1287 |
| BTF3       | 1. 400233 | 8. 409953 | 16. 34331 | 5. 45E-44  | 3. 57E-43  | 87. 40649 |
| ENC1       | 2. 054261 | 4. 037947 | 22. 89006 | 3. 69E-69  | 4. 46E-68  | 145. 3872 |
| HEXB       | 2. 005671 | 6. 314232 | 28. 54103 | 1. 22E-89  | 3. 04E-88  | 192. 6166 |
| HMGCR      | 1. 451413 | 3. 295839 | 19. 77978 | 2. 65E-57  | 2. 33E-56  | 118. 062  |
| COL4A3BP   | 1. 21157  | 2. 908457 | 20. 77734 | 3. 87E-61  | 3. 75E-60  | 126. 9    |
| AC113404.1 | 1. 276075 | 1. 127725 | 22. 71343 | 1. 70E-68  | 2. 02E-67  | 143. 8561 |
| F2RL2      | 2. 32342  | 1. 483173 | 26. 61854 | 7. 49E-83  | 1. 42E-81  | 176. 9604 |
| F2R        | 3. 741575 | 3. 032161 | 39. 75233 | 2. 82E-125 | 5. 51E-123 | 274. 8456 |
| F2RL1      | 2. 37144  | 3. 697951 | 27. 41533 | 1. 09E-85  | 2. 29E-84  | 183. 5036 |
| AGGF1      | 1. 211275 | 2. 459904 | 24. 79684 | 3. 03E-76  | 4. 60E-75  | 161. 7222 |
| WDR41      | 1. 004653 | 3. 475154 | 16. 89849 | 3. 86E-46  | 2. 64E-45  | 92. 35475 |
| TBCA       | 1. 782749 | 6. 476485 | 24. 78177 | 3. 45E-76  | 5. 21E-75  | 161. 5946 |
| AP3B1      | 1. 624898 | 4. 008667 | 29. 7619  | 7. 57E-94  | 2. 32E-92  | 202. 3231 |
| SCAMP1     | 1. 664289 | 3. 09263  | 26. 58889 | 9. 56E-83  | 1. 80E-81  | 176. 7155 |
| LHFPL2     | 1. 5953   | 3. 176628 | 24. 81808 | 2. 53E-76  | 3. 86E-75  | 161. 902  |
| HOMER1     | 1. 108682 | 0. 894729 | 22. 56251 | 6. 30E-68  | 7. 34E-67  | 142. 5454 |
| THBS4      | 2. 346203 | 4. 127962 | 17. 36228 | 6. 13E-48  | 4. 35E-47  | 96. 49539 |
| SERINC5    | 1. 997054 | 2. 714599 | 30. 091   | 5. 74E-95  | 1. 86E-93  | 204. 9078 |
| DHFR       | 2. 300188 | 1. 98819  | 40. 83629 | 2. 22E-128 | 5. 38E-126 | 282. 0084 |
| RASGRF2    | 1. 52192  | 1. 326729 | 23. 23034 | 1. 95E-70  | 2. 46E-69  | 148. 329  |
| ZCCHC9     | 1. 43183  | 3. 398781 | 25. 75713 | 9. 51E-80  | 1. 62E-78  | 169. 8022 |
| TMEM167A   | 1. 502304 | 4. 261126 | 24. 73956 | 4. 92E-76  | 7. 41E-75  | 161. 237  |
| XRCC4      | 2. 304746 | 2. 117022 | 31. 21586 | 9. 42E-99  | 3. 68E-97  | 213. 6397 |
| VCAN       | 4. 979107 | 3. 880933 | 39. 37284 | 3. 55E-124 | 6. 34E-122 | 272. 3071 |
| EDIL3      | 3. 395425 | 2. 239074 | 34. 08362 | 4. 33E-108 | 2. 89E-106 | 235. 1856 |
| COX7C      | 1. 586246 | 8. 539528 | 19. 1531  | 6. 99E-55  | 5. 81E-54  | 112. 4849 |
| RASA1      | 1. 596407 | 3. 206222 | 21. 51093 | 6. 09E-64  | 6. 36E-63  | 133. 359  |
| CCNH       | 1. 269237 | 4. 211656 | 21. 46946 | 8. 77E-64  | 9. 12E-63  | 132. 995  |
| MEF2C      | 1. 705031 | 1. 990338 | 21. 18654 | 1. 05E-62  | 1. 06E-61  | 130. 5076 |
| CETN3      | 1. 711507 | 3. 172629 | 29. 36098 | 1. 79E-92  | 5. 10E-91  | 199. 1561 |
| ARRDC3     | 1. 637593 | 3. 782718 | 15. 52239 | 8. 02E-41  | 4. 91E-40  | 80. 11798 |
| NR2F1-AS1  | 2. 202331 | 2. 185198 | 29. 1019  | 1. 39E-91  | 3. 83E-90  | 197. 0988 |
| NR2F1      | 1. 457775 | 2. 87411  | 16. 41798 | 2. 80E-44  | 1. 84E-43  | 88. 07126 |
| MCTP1      | 1. 727757 | 1. 72245  | 23. 88789 | 6. 90E-73  | 9. 34E-72  | 153. 9817 |
| FAM81B     | 1. 146147 | 1. 021305 | 8. 606447 | 3. 55E-16  | 1. 29E-15  | 23. 5964  |
| GPR150     | -1. 34535 | 1. 072843 | -21. 9034 | 1. 96E-65  | 2. 14E-64  | 136. 7983 |
| GLRX       | 2. 713873 | 3. 773997 | 31. 74066 | 1. 71E-100 | 7. 32E-99  | 217. 6593 |
| CAST       | 2. 376424 | 5. 544293 | 28. 77128 | 1. 94E-90  | 5. 04E-89  | 194. 4614 |
| ERAP1      | 1. 702293 | 3. 408924 | 23. 95105 | 4. 02E-73  | 5. 48E-72  | 154. 5223 |
| ERAP2      | 2. 22846  | 2. 184302 | 16. 07483 | 5. 95E-43  | 3. 81E-42  | 85. 01831 |
| LNPEP      | 1. 360604 | 2. 187694 | 27. 07271 | 1. 79E-84  | 3. 59E-83  | 180. 6993 |
| RIOK2      | 1. 149563 | 3. 482277 | 21. 51852 | 5. 70E-64  | 5. 96E-63  | 133. 4257 |
| ST8SIA4    | 1. 417    | 0. 963394 | 25. 23541 | 7. 52E-78  | 1. 20E-76  | 165. 4251 |

|           |           |           |           |            |            |           |
|-----------|-----------|-----------|-----------|------------|------------|-----------|
| PAM       | 2. 316273 | 5. 888807 | 27. 48984 | 5. 94E-86  | 1. 26E-84  | 184. 1116 |
| C5orf30   | 1. 419129 | 2. 138035 | 22. 43062 | 1. 98E-67  | 2. 28E-66  | 141. 3984 |
| PSMC1P5   | 1. 322078 | 4. 08828  | 8. 724061 | 1. 54E-16  | 5. 66E-16  | 24. 42311 |
| EFNA5     | 2. 76756  | 1. 674305 | 37. 76189 | 1. 99E-119 | 2. 69E-117 | 261. 3491 |
| FBXL17    | 1. 262227 | 2. 306651 | 24. 56263 | 2. 20E-75  | 3. 25E-74  | 159. 7361 |
| FER       | 1. 064006 | 1. 306303 | 24. 6201  | 1. 35E-75  | 2. 01E-74  | 160. 224  |
| PJA2      | 1. 142104 | 4. 142517 | 15. 73624 | 1. 20E-41  | 7. 51E-41  | 82. 01249 |
| SLC25A46  | 1. 057665 | 3. 22578  | 18. 16581 | 4. 68E-51  | 3. 55E-50  | 103. 6741 |
| CAMK4     | 1. 1726   | 0. 696797 | 23. 41235 | 4. 07E-71  | 5. 22E-70  | 149. 8979 |
| STARD4    | 1. 205013 | 2. 083903 | 17. 63506 | 5. 36E-49  | 3. 89E-48  | 98. 93219 |
| NREP      | 3. 658753 | 3. 633798 | 42. 5416  | 3. 77E-133 | 1. 40E-130 | 293. 0186 |
| EPB41L4A  | 1. 114429 | 2. 019759 | 16. 47922 | 1. 62E-44  | 1. 07E-43  | 88. 61677 |
| REEP5     | 1. 083627 | 5. 808845 | 15. 80842 | 6. 35E-42  | 3. 98E-41  | 82. 6526  |
| DCP2      | 1. 317518 | 2. 201449 | 28. 23188 | 1. 46E-88  | 3. 45E-87  | 190. 1293 |
| MCC       | 1. 303252 | 1. 426747 | 23. 7478  | 2. 29E-72  | 3. 04E-71  | 152. 781  |
| PGGT1B    | 1. 498997 | 2. 271266 | 23. 90345 | 6. 04E-73  | 8. 18E-72  | 154. 1149 |
| FEM1C     | 1. 110592 | 2. 404753 | 19. 93993 | 6. 40E-58  | 5. 70E-57  | 119. 4845 |
| TMED7     | 1. 328509 | 4. 346789 | 18. 3322  | 1. 06E-51  | 8. 15E-51  | 105. 1604 |
| AP3S1     | 1. 077874 | 5. 311589 | 15. 74687 | 1. 10E-41  | 6. 84E-41  | 82. 10671 |
| TNFAIP8   | 1. 694479 | 3. 39571  | 20. 38742 | 1. 21E-59  | 1. 13E-58  | 123. 4522 |
| PRR16     | 1. 174286 | 1. 35504  | 17. 92587 | 3. 99E-50  | 2. 96E-49  | 101. 5305 |
| SRFBP1    | 1. 227536 | 1. 671102 | 26. 07511 | 6. 73E-81  | 1. 19E-79  | 172. 4546 |
| LOX       | 2. 674048 | 2. 485672 | 24. 99182 | 5. 84E-77  | 9. 05E-76  | 163. 3711 |
| SNCAIP    | 1. 458031 | 0. 872921 | 20. 80069 | 3. 15E-61  | 3. 06E-60  | 127. 1061 |
| SNX2      | 1. 386271 | 4. 58991  | 21. 92636 | 1. 61E-65  | 1. 75E-64  | 136. 999  |
| SNX24     | 1. 439384 | 2. 801345 | 26. 54884 | 1. 33E-82  | 2. 49E-81  | 176. 3844 |
| PPIC      | 2. 421559 | 4. 700161 | 36. 02121 | 3. 77E-114 | 3. 73E-112 | 249. 1696 |
| CSNK1G3   | 1. 436017 | 2. 792547 | 24. 61353 | 1. 43E-75  | 2. 12E-74  | 160. 1682 |
| GRAMD3    | 1. 658778 | 2. 965141 | 25. 26526 | 5. 85E-78  | 9. 39E-77  | 165. 6764 |
| ALDH7A1   | 1. 25752  | 4. 619087 | 20. 32658 | 2. 08E-59  | 1. 92E-58  | 122. 9134 |
| PHAX      | 1. 883176 | 3. 348059 | 29. 56303 | 3. 62E-93  | 1. 07E-91  | 200. 7546 |
| LMNB1     | 2. 731267 | 2. 446134 | 41. 45736 | 3. 93E-130 | 1. 11E-127 | 286. 0544 |
| 3-Mar     | 1. 963608 | 2. 356782 | 25. 85271 | 4. 28E-80  | 7. 36E-79  | 170. 6006 |
| PRRC1     | 1. 029258 | 3. 997925 | 17. 21458 | 2. 29E-47  | 1. 61E-46  | 95. 17627 |
| LINC01184 | 1. 546756 | 3. 131211 | 31. 82115 | 9. 24E-101 | 4. 02E-99  | 218. 2728 |
| SLC12A2   | 2. 508116 | 2. 902347 | 29. 45519 | 8. 48E-93  | 2. 46E-91  | 199. 9021 |
| CHSY3     | 1. 268555 | 0. 7704   | 24. 80676 | 2. 79E-76  | 4. 24E-75  | 161. 8062 |
| HINT1     | 1. 667572 | 6. 980067 | 23. 59811 | 8. 26E-72  | 1. 08E-70  | 151. 4959 |
| CDC42SE2  | 1. 56321  | 3. 914367 | 25. 75355 | 9. 80E-80  | 1. 66E-78  | 169. 7722 |
| CSF2      | 1. 399421 | 0. 674645 | 19. 43415 | 5. 72E-56  | 4. 87E-55  | 114. 988  |
| PDLIM4    | 3. 757525 | 3. 49251  | 39. 37558 | 3. 49E-124 | 6. 26E-122 | 272. 3255 |
| SLC22A4   | 1. 021415 | 0. 715083 | 27. 38021 | 1. 45E-85  | 3. 02E-84  | 183. 2168 |
| IRF1      | 2. 592302 | 3. 965845 | 27. 39453 | 1. 29E-85  | 2. 70E-84  | 183. 3338 |
| KIF3A     | 1. 02316  | 1. 669506 | 19. 77704 | 2. 72E-57  | 2. 39E-56  | 118. 0377 |
| CCNI2     | 1. 253501 | 1. 65874  | 21. 7112  | 1. 05E-64  | 1. 12E-63  | 135. 1156 |
| 8-Sep     | 1. 410305 | 4. 058917 | 20. 5188  | 3. 80E-60  | 3. 58E-59  | 124. 615  |
| UQCRQ     | 1. 538729 | 7. 378714 | 20. 85547 | 1. 94E-61  | 1. 90E-60  | 127. 5897 |
| AFF4      | 1. 229198 | 3. 2082   | 17. 95339 | 3. 12E-50  | 2. 32E-49  | 101. 7764 |
| ZCCHC10   | 1. 571541 | 3. 385514 | 30. 22664 | 1. 99E-95  | 6. 58E-94  | 205. 9691 |
| HSPA4     | 2. 014639 | 4. 930337 | 33. 40319 | 6. 48E-106 | 3. 82E-104 | 230. 1659 |
| C5orf15   | 2. 287242 | 4. 242891 | 34. 18227 | 2. 10E-108 | 1. 43E-106 | 235. 9086 |
| VDAC1     | 2. 381008 | 6. 238671 | 32. 28931 | 2. 67E-102 | 1. 27E-100 | 221. 8247 |
| TCF7      | 1. 219953 | 2. 734783 | 16. 1062  | 4. 50E-43  | 2. 89E-42  | 85. 29716 |
| SKP1      | 1. 84082  | 7. 456316 | 22. 83583 | 5. 90E-69  | 7. 09E-68  | 144. 9174 |

|               |           |           |           |            |            |           |
|---------------|-----------|-----------|-----------|------------|------------|-----------|
| PPP2CA        | 1. 642762 | 4. 622464 | 23. 34791 | 7. 09E-71  | 9. 02E-70  | 149. 3429 |
| UBE2B         | 1. 013251 | 6. 02498  | 12. 82143 | 1. 31E-30  | 6. 55E-30  | 56. 64309 |
| AC005355. 2   | 1. 546189 | 1. 066167 | 25. 10469 | 2. 26E-77  | 3. 55E-76  | 164. 3236 |
| JADE2         | 1. 238595 | 3. 204375 | 18. 05773 | 1. 23E-50  | 9. 22E-50  | 102. 7086 |
| SAR1B         | 1. 121552 | 4. 214897 | 17. 08942 | 7. 02E-47  | 4. 88E-46  | 94. 0588  |
| CAMLG         | 1. 428148 | 4. 325613 | 23. 16038 | 3. 57E-70  | 4. 46E-69  | 147. 7251 |
| C5orf24       | 1. 421018 | 3. 130603 | 22. 12494 | 2. 84E-66  | 3. 16E-65  | 138. 7341 |
| TXNDC15       | 1. 196058 | 4. 838597 | 20. 28334 | 3. 05E-59  | 2. 81E-58  | 122. 5303 |
| MTND4P12      | 2. 834453 | 1. 713846 | 14. 53764 | 4. 73E-37  | 2. 69E-36  | 71. 44667 |
| PITX1         | 3. 723979 | 1. 931534 | 35. 16611 | 1. 68E-111 | 1. 39E-109 | 243. 0543 |
| H2AFY         | 2. 728071 | 5. 679295 | 39. 6305  | 6. 35E-125 | 1. 20E-122 | 274. 0325 |
| CXCL14        | 4. 531852 | 4. 231233 | 31. 31235 | 4. 49E-99  | 1. 78E-97  | 214. 3813 |
| TGFBI         | 4. 35421  | 5. 182501 | 34. 63589 | 7. 74E-110 | 5. 77E-108 | 239. 218  |
| SMAD5         | 1. 051124 | 2. 753927 | 18. 63732 | 6. 94E-53  | 5. 49E-52  | 107. 8847 |
| SPOCK1        | 2. 117712 | 2. 513148 | 19. 2362  | 3. 33E-55  | 2. 79E-54  | 113. 2254 |
| HNRNPA0       | 1. 631981 | 3. 618353 | 30. 58775 | 1. 20E-96  | 4. 21E-95  | 208. 7835 |
| KIF20A        | 2. 229817 | 1. 224174 | 38. 48294 | 1. 44E-121 | 2. 26E-119 | 266. 2905 |
| CDC23         | 1. 217019 | 2. 984404 | 22. 97205 | 1. 81E-69  | 2. 21E-68  | 146. 0971 |
| CDC25C        | 1. 319985 | 0. 696878 | 31. 94    | 3. 75E-101 | 1. 66E-99  | 219. 177  |
| RP11-256P1. 1 | 1. 668056 | 1. 097948 | 15. 00216 | 7. 97E-39  | 4. 70E-38  | 75. 52508 |
| KDM3B         | 1. 177871 | 3. 968515 | 18. 9199  | 5. 58E-54  | 4. 53E-53  | 110. 4059 |
| EGR1          | 1. 626713 | 5. 498386 | 9. 363913 | 1. 47E-18  | 5. 66E-18  | 29. 03757 |
| ETF1          | 1. 442574 | 4. 463904 | 22. 73919 | 1. 36E-68  | 1. 62E-67  | 144. 0795 |
| HSPA9         | 1. 184592 | 5. 788225 | 17. 51989 | 1. 50E-48  | 1. 08E-47  | 97. 90329 |
| CTNNA1        | 2. 252726 | 6. 389073 | 29. 20794 | 6. 00E-92  | 1. 68E-90  | 197. 9418 |
| MATR3         | 1. 506068 | 5. 903391 | 20. 85762 | 1. 91E-61  | 1. 86E-60  | 127. 6086 |
| PAIP2         | 1. 405255 | 4. 939059 | 21. 35679 | 2. 36E-63  | 2. 42E-62  | 132. 0051 |
| CTB-43P18. 1  | 1. 129001 | 1. 165527 | 18. 85773 | 9. 72E-54  | 7. 84E-53  | 109. 8514 |
| MZB1          | 3. 264219 | 2. 064496 | 24. 47251 | 4. 73E-75  | 6. 90E-74  | 158. 9703 |
| DNAJC18       | 1. 289859 | 1. 717695 | 23. 06094 | 8. 42E-70  | 1. 04E-68  | 146. 8659 |
| ECSCR         | 2. 089134 | 2. 753474 | 25. 53674 | 6. 00E-79  | 9. 93E-78  | 167. 9569 |
| TMEM173       | 3. 214236 | 4. 211288 | 39. 68728 | 4. 35E-125 | 8. 41E-123 | 274. 4116 |
| UBE2D2        | 1. 476406 | 5. 633303 | 22. 05828 | 5. 07E-66  | 5. 60E-65  | 138. 1521 |
| CYSTM1        | 3. 072521 | 6. 355609 | 30. 62716 | 8. 83E-97  | 3. 13E-95  | 209. 0896 |
| PFDN1         | 2. 154298 | 4. 71378  | 37. 30943 | 4. 52E-118 | 5. 62E-116 | 258. 2176 |
| HBEGF         | 2. 979795 | 2. 68269  | 32. 00746 | 2. 25E-101 | 1. 01E-99  | 219. 6896 |
| SRA1          | 1. 700323 | 4. 02581  | 32. 60044 | 2. 57E-103 | 1. 30E-101 | 224. 1701 |
| SLC35A4       | 1. 405784 | 4. 569349 | 23. 70892 | 3. 19E-72  | 4. 23E-71  | 152. 4474 |
| CD14          | 2. 883627 | 4. 207889 | 28. 48537 | 1. 91E-89  | 4. 71E-88  | 192. 1697 |
| NDUFA2        | 1. 624464 | 5. 600279 | 26. 92539 | 6. 00E-84  | 1. 18E-82  | 179. 4892 |
| IK            | 1. 832356 | 5. 3007   | 29. 70919 | 1. 15E-93  | 3. 47E-92  | 201. 9079 |
| HARS2         | 1. 201969 | 3. 651243 | 21. 594   | 2. 94E-64  | 3. 10E-63  | 134. 088  |
| ZMAT2         | 2. 095046 | 4. 961114 | 33. 44647 | 4. 70E-106 | 2. 79E-104 | 230. 4869 |
| PCDHB9        | 1. 19433  | 0. 946368 | 20. 32442 | 2. 12E-59  | 1. 96E-58  | 122. 8943 |
| PCDHB10       | 1. 17582  | 0. 968513 | 27. 52664 | 4. 40E-86  | 9. 37E-85  | 184. 4116 |
| TAF7          | 1. 938522 | 4. 963923 | 30. 02785 | 9. 40E-95  | 3. 02E-93  | 204. 4128 |
| PCDHGB2       | 1. 073843 | 0. 958918 | 12. 90308 | 6. 55E-31  | 3. 29E-30  | 57. 33558 |
| PCDHGC3       | 1. 932055 | 4. 385666 | 23. 62097 | 6. 79E-72  | 8. 87E-71  | 151. 6923 |
| DIAPH1        | 1. 701185 | 5. 075439 | 22. 25226 | 9. 35E-67  | 1. 05E-65  | 139. 8448 |
| ARAP3         | 1. 681166 | 2. 28594  | 25. 79128 | 7. 15E-80  | 1. 22E-78  | 170. 0876 |
| PCDH1         | 3. 016541 | 4. 151206 | 31. 5988  | 5. 03E-100 | 2. 10E-98  | 216. 5761 |
| PCDH12        | 1. 246686 | 1. 261968 | 21. 35883 | 2. 32E-63  | 2. 38E-62  | 132. 023  |
| RNF14         | 1. 383451 | 3. 950578 | 22. 33114 | 4. 71E-67  | 5. 36E-66  | 140. 5322 |
| GNPDA1        | 2. 156275 | 3. 433266 | 37. 43527 | 1. 89E-118 | 2. 42E-116 | 259. 0909 |

|              |           |           |           |            |            |           |
|--------------|-----------|-----------|-----------|------------|------------|-----------|
| NDFIP1       | 1. 342467 | 4. 720714 | 23. 14375 | 4. 12E-70  | 5. 13E-69  | 147. 5815 |
| SPRY4        | 2. 344269 | 2. 566674 | 33. 88319 | 1. 88E-107 | 1. 21E-105 | 233. 7129 |
| FGF1         | 1. 634194 | 1. 00803  | 27. 9591  | 1. 32E-87  | 2. 98E-86  | 187. 925  |
| ARHGAP26     | 2. 375818 | 2. 552449 | 31. 8378  | 8. 15E-101 | 3. 56E-99  | 218. 3996 |
| NR3C1        | 1. 473539 | 2. 804167 | 22. 8628  | 4. 67E-69  | 5. 63E-68  | 145. 1511 |
| YIPF5        | 1. 07579  | 4. 089141 | 15. 38741 | 2. 65E-40  | 1. 61E-39  | 78. 92404 |
| PRELID2      | 1. 358668 | 2. 508843 | 19. 64185 | 9. 03E-57  | 7. 84E-56  | 116. 8359 |
| RBM27        | 1. 350733 | 2. 036847 | 27. 12507 | 1. 17E-84  | 2. 35E-83  | 181. 1288 |
| PPP2R2B      | 1. 239469 | 0. 972452 | 21. 05614 | 3. 32E-62  | 3. 30E-61  | 129. 3591 |
| DPYSL3       | 4. 226232 | 3. 392889 | 43. 26333 | 3. 96E-135 | 1. 74E-132 | 297. 5857 |
| SPINK1       | -3. 53817 | 11. 69948 | -16. 4907 | 1. 47E-44  | 9. 70E-44  | 88. 71884 |
| C5orf46      | 2. 871012 | 1. 63946  | 28. 8943  | 7. 26E-91  | 1. 93E-89  | 195. 4443 |
| SPINK5       | 1. 283556 | 0. 977068 | 15. 45685 | 1. 43E-40  | 8. 74E-40  | 79. 53809 |
| FBXO38       | 1. 055346 | 3. 306027 | 18. 26736 | 1. 89E-51  | 1. 44E-50  | 104. 5813 |
| ABLIM3       | 2. 94384  | 2. 590641 | 34. 4357  | 3. 31E-109 | 2. 38E-107 | 237. 7606 |
| AFAP1L1      | 1. 414856 | 1. 368051 | 24. 66562 | 9. 21E-76  | 1. 37E-74  | 160. 6102 |
| GRPEL2       | 1. 20414  | 1. 843614 | 28. 88774 | 7. 65E-91  | 2. 03E-89  | 195. 3919 |
| PCYOX1L      | 1. 11155  | 2. 398166 | 21. 00747 | 5. 09E-62  | 5. 04E-61  | 128. 9302 |
| CSNK1A1      | 2. 135694 | 5. 285553 | 29. 44711 | 9. 04E-93  | 2. 61E-91  | 199. 8381 |
| SLC26A2      | 1. 119325 | 1. 557161 | 21. 54962 | 4. 34E-64  | 4. 55E-63  | 133. 6986 |
| HMGXB3       | 1. 085456 | 3. 530902 | 17. 31151 | 9. 65E-48  | 6. 82E-47  | 96. 04189 |
| CSF1R        | 2. 315112 | 2. 971538 | 22. 03919 | 5. 99E-66  | 6. 61E-65  | 137. 9853 |
| RPL7P1       | 1. 258544 | 4. 249469 | 14. 25762 | 5. 48E-36  | 3. 04E-35  | 69. 0004  |
| PDGFRB       | 2. 702536 | 4. 520489 | 27. 53852 | 4. 00E-86  | 8. 52E-85  | 184. 5084 |
| CDX1         | 1. 103905 | 0. 569027 | 12. 29783 | 1. 09E-28  | 5. 24E-28  | 52. 23697 |
| ARSI         | 1. 634049 | 0. 940264 | 25. 17668 | 1. 23E-77  | 1. 95E-76  | 164. 9305 |
| TCOF1        | 1. 071979 | 3. 301068 | 20. 32286 | 2. 15E-59  | 1. 98E-58  | 122. 8804 |
| CD74         | 4. 39802  | 8. 723944 | 36. 45129 | 1. 81E-115 | 1. 92E-113 | 252. 2122 |
| SYNPO        | 1. 791041 | 4. 433585 | 21. 30485 | 3. 72E-63  | 3. 80E-62  | 131. 5484 |
| RBM22        | 1. 217008 | 4. 059058 | 22. 18396 | 1. 70E-66  | 1. 90E-65  | 139. 2492 |
| SMIM3        | 1. 210976 | 4. 089962 | 14. 42375 | 1. 28E-36  | 7. 22E-36  | 70. 45047 |
| TNIP1        | 1. 865773 | 5. 670005 | 27. 12153 | 1. 20E-84  | 2. 42E-83  | 181. 0998 |
| ANXA6        | 1. 785459 | 5. 661632 | 20. 93515 | 9. 62E-62  | 9. 47E-61  | 128. 2926 |
| GM2A         | 2. 493082 | 3. 34735  | 39. 69357 | 4. 17E-125 | 8. 09E-123 | 274. 4536 |
| SPARC        | 5. 380322 | 8. 170028 | 40. 51989 | 1. 77E-127 | 4. 03E-125 | 279. 931  |
| ATOX1        | 2. 651522 | 5. 659681 | 40. 96326 | 9. 71E-129 | 2. 46E-126 | 282. 8389 |
| RPLP1P6      | 1. 051716 | 0. 924891 | 21. 88997 | 2. 21E-65  | 2. 40E-64  | 136. 6807 |
| RP11-54C4. 3 | 1. 022947 | 1. 060516 | 24. 02028 | 2. 23E-73  | 3. 06E-72  | 155. 1145 |
| G3BP1        | 1. 905417 | 4. 223169 | 27. 4375  | 9. 10E-86  | 1. 92E-84  | 183. 6846 |
| NMUR2        | 1. 256457 | 0. 604376 | 13. 00824 | 2. 67E-31  | 1. 35E-30  | 58. 22946 |
| MFAP3        | 1. 246742 | 2. 340346 | 15. 78097 | 8. 10E-42  | 5. 06E-41  | 82. 4091  |
| GALNT10      | 2. 376195 | 3. 319782 | 35. 22072 | 1. 14E-111 | 9. 55E-110 | 243. 4475 |
| SAP30L       | 1. 240784 | 3. 764103 | 22. 74725 | 1. 27E-68  | 1. 51E-67  | 144. 1495 |
| FAXDC2       | 1. 363594 | 2. 770363 | 16. 21153 | 1. 76E-43  | 1. 14E-42  | 86. 23385 |
| CNOT8        | 1. 773146 | 4. 054448 | 28. 55256 | 1. 11E-89  | 2. 78E-88  | 192. 7091 |
| GEMIN5       | 1. 054154 | 1. 973464 | 23. 55098 | 1. 24E-71  | 1. 61E-70  | 151. 0907 |
| MRPL22       | 1. 435295 | 4. 650004 | 25. 97087 | 1. 60E-80  | 2. 79E-79  | 171. 5863 |
| SGCD         | 1. 648791 | 1. 003359 | 22. 6295  | 3. 52E-68  | 4. 14E-67  | 143. 1274 |
| HAVCR2       | 2. 287649 | 1. 835698 | 29. 66438 | 1. 63E-93  | 4. 91E-92  | 201. 5546 |
| MED7         | 1. 467708 | 2. 547339 | 31. 64815 | 3. 45E-100 | 1. 46E-98  | 216. 9532 |
| ITK          | 1. 134426 | 0. 872042 | 14. 28433 | 4. 34E-36  | 2. 41E-35  | 69. 23327 |
| CYFIP2       | 1. 756184 | 2. 945129 | 23. 9098  | 5. 72E-73  | 7. 75E-72  | 154. 1692 |
| ADAM19       | 2. 787827 | 1. 709871 | 34. 16399 | 2. 40E-108 | 1. 63E-106 | 235. 7748 |
| THG1L        | 1. 327733 | 2. 933004 | 22. 59004 | 4. 96E-68  | 5. 80E-67  | 142. 7846 |

|               |           |           |           |            |            |           |
|---------------|-----------|-----------|-----------|------------|------------|-----------|
| CLINT1        | 1. 513234 | 5. 019807 | 19. 08323 | 1. 30E-54  | 1. 07E-53  | 111. 8622 |
| RNF145        | 2. 476695 | 4. 130561 | 32. 5892  | 2. 80E-103 | 1. 41E-101 | 224. 0856 |
| UBLCP1        | 1. 31245  | 3. 403395 | 25. 39421 | 1. 98E-78  | 3. 23E-77  | 166. 7606 |
| TTC1          | 1. 820543 | 4. 286008 | 33. 11366 | 5. 55E-105 | 3. 10E-103 | 228. 0126 |
| FABP6         | 1. 933491 | 1. 041619 | 16. 63827 | 3. 93E-45  | 2. 64E-44  | 90. 034   |
| CCNJL         | 1. 326374 | 0. 794976 | 22. 12048 | 2. 95E-66  | 3. 28E-65  | 138. 6952 |
| SLU7          | 1. 452869 | 3. 939835 | 25. 8715  | 3. 66E-80  | 6. 30E-79  | 170. 7575 |
| PTTG1         | 3. 984549 | 2. 685962 | 53. 37095 | 1. 45E-160 | 4. 40E-157 | 356. 2975 |
| ATP10B        | 1. 729487 | 1. 904972 | 14. 22518 | 7. 28E-36  | 4. 03E-35  | 68. 71765 |
| NUCD2         | 1. 294977 | 3. 387851 | 24. 29072 | 2. 22E-74  | 3. 16E-73  | 157. 4229 |
| HMMR          | 1. 919449 | 1. 105472 | 33. 41834 | 5. 79E-106 | 3. 42E-104 | 230. 2783 |
| MAT2B         | 2. 233519 | 4. 326362 | 34. 08556 | 4. 27E-108 | 2. 85E-106 | 235. 1998 |
| CTB-63M22. 1  | 1. 66837  | 5. 776639 | 10. 91029 | 9. 54E-24  | 4. 12E-23  | 40. 90451 |
| WWC1          | 1. 056361 | 4. 075073 | 14. 32807 | 2. 96E-36  | 1. 65E-35  | 69. 61491 |
| RARS          | 1. 08379  | 4. 614666 | 18. 48395 | 2. 73E-52  | 2. 13E-51  | 106. 5155 |
| PANK3         | 1. 275686 | 2. 533906 | 20. 87356 | 1. 66E-61  | 1. 62E-60  | 127. 7493 |
| SLIT3         | 1. 726017 | 2. 048251 | 15. 76873 | 9. 03E-42  | 5. 64E-41  | 82. 30052 |
| SPDL1         | 1. 399321 | 1. 879407 | 26. 11371 | 4. 88E-81  | 8. 65E-80  | 172. 7758 |
| DOCK2         | 1. 97733  | 1. 855484 | 23. 39624 | 4. 68E-71  | 5. 98E-70  | 149. 7592 |
| LCP2          | 2. 234682 | 2. 606525 | 23. 98379 | 3. 04E-73  | 4. 16E-72  | 154. 8024 |
| GABRP         | 4. 646417 | 2. 445673 | 26. 30414 | 1. 01E-81  | 1. 83E-80  | 174. 3578 |
| NPM1          | 1. 096229 | 9. 138017 | 10. 45758 | 3. 45E-22  | 1. 44E-21  | 37. 33645 |
| FGF18         | 1. 047118 | 0. 70406  | 19. 06132 | 1. 58E-54  | 1. 30E-53  | 111. 6669 |
| STK10         | 2. 302572 | 3. 032286 | 36. 48214 | 1. 46E-115 | 1. 57E-113 | 252. 4296 |
| UBTD2         | 1. 703701 | 2. 810457 | 31. 83419 | 8. 37E-101 | 3. 65E-99  | 218. 3721 |
| SH3PXD2B      | 1. 894285 | 3. 041832 | 24. 5169  | 3. 25E-75  | 4. 76E-74  | 159. 3476 |
| NEURL1B       | 1. 48599  | 2. 311608 | 18. 95054 | 4. 25E-54  | 3. 46E-53  | 110. 6792 |
| CTB-79E8. 3   | -1. 39269 | 1. 068154 | -15. 4963 | 1. 01E-40  | 6. 18E-40  | 79. 8872  |
| CTB-79E8. 2   | 1. 155134 | 0. 974443 | 13. 88581 | 1. 40E-34  | 7. 56E-34  | 65. 7687  |
| DUSP1         | 1. 617681 | 6. 202735 | 11. 8212  | 5. 76E-27  | 2. 67E-26  | 48. 28338 |
| ERGIC1        | 1. 543681 | 5. 696467 | 22. 06067 | 4. 97E-66  | 5. 49E-65  | 138. 1729 |
| RPL26L1       | 2. 001513 | 4. 198104 | 35. 58664 | 8. 28E-113 | 7. 38E-111 | 246. 0728 |
| ATP6V0E1      | 2. 153357 | 7. 040283 | 29. 73227 | 9. 55E-94  | 2. 90E-92  | 202. 0898 |
| MSX2          | 2. 098999 | 1. 243462 | 28. 83171 | 1. 20E-90  | 3. 14E-89  | 194. 9445 |
| SFXN1         | 1. 658075 | 2. 942509 | 27. 91804 | 1. 84E-87  | 4. 13E-86  | 187. 5924 |
| JTC-251I16. 1 | 1. 179218 | 1. 123143 | 17. 35706 | 6. 43E-48  | 4. 56E-47  | 96. 44878 |
| THOC3         | 2. 070068 | 3. 774247 | 31. 44623 | 1. 61E-99  | 6. 55E-98  | 215. 4084 |
| FAM153B       | -1. 21674 | 1. 842515 | -12. 1353 | 4. 24E-28  | 2. 02E-27  | 50. 88255 |
| SIMC1         | 1. 155924 | 2. 346356 | 21. 01528 | 4. 75E-62  | 4. 71E-61  | 128. 9991 |
| KIAA1191      | 1. 278406 | 4. 877144 | 19. 52452 | 2. 56E-56  | 2. 20E-55  | 115. 7923 |
| NOP16         | 1. 757628 | 3. 808917 | 27. 5122  | 4. 95E-86  | 1. 05E-84  | 184. 2939 |
| HIGD2A        | 1. 769736 | 6. 145794 | 25. 17895 | 1. 21E-77  | 1. 92E-76  | 164. 9496 |
| CLTB          | 3. 048054 | 6. 161907 | 34. 35877 | 5. 80E-109 | 4. 12E-107 | 237. 1992 |
| FAF2          | 1. 413912 | 3. 48786  | 24. 54975 | 2. 46E-75  | 3. 62E-74  | 159. 6267 |
| CDHR2         | 3. 733506 | 1. 981777 | 28. 37204 | 4. 74E-89  | 1. 15E-87  | 191. 2584 |
| GPRIN1        | 1. 246336 | 0. 951679 | 14. 53003 | 5. 06E-37  | 2. 87E-36  | 71. 38005 |
| TSPAN17       | 1. 424094 | 4. 139297 | 23. 10985 | 5. 52E-70  | 6. 85E-69  | 147. 2887 |
| HK3           | 1. 583568 | 1. 667778 | 16. 66706 | 3. 04E-45  | 2. 05E-44  | 90. 29066 |
| LMAN2         | 1. 384999 | 6. 563854 | 19. 35978 | 1. 11E-55  | 9. 37E-55  | 114. 326  |
| RGS14         | 1. 122997 | 3. 8786   | 14. 95143 | 1. 25E-38  | 7. 32E-38  | 75. 07854 |
| F12           | 2. 13621  | 2. 09729  | 23. 09725 | 6. 15E-70  | 7. 61E-69  | 147. 1798 |
| GRK6          | 1. 811104 | 3. 454351 | 32. 10979 | 1. 04E-101 | 4. 75E-100 | 220. 4659 |
| DBN1          | 2. 618306 | 4. 189337 | 32. 16892 | 6. 62E-102 | 3. 07E-100 | 220. 9139 |
| PDLIM7        | 3. 711988 | 5. 07691  | 37. 09467 | 2. 01E-117 | 2. 38E-115 | 256. 7227 |



|              |          |          |          |           |           |          |
|--------------|----------|----------|----------|-----------|-----------|----------|
| DOK3         | 1.344249 | 2.214166 | 16.10474 | 4.56E-43  | 2.92E-42  | 85.28414 |
| DDX41        | 1.70652  | 5.227518 | 25.02914 | 4.27E-77  | 6.63E-76  | 163.6862 |
| TMED9        | 1.021493 | 7.132301 | 13.21911 | 4.40E-32  | 2.27E-31  | 60.02845 |
| FAM153A      | -1.07947 | 1.461581 | -11.4105 | 1.68E-25  | 7.53E-25  | 44.92571 |
| RP11-423H2.1 | 1.626188 | 3.307891 | 22.77966 | 9.59E-69  | 1.15E-67  | 144.4305 |
| RP11-423H2.5 | -1.26606 | 1.947955 | -11.3521 | 2.70E-25  | 1.20E-24  | 44.45187 |
| FAM153C      | -1.5496  | 1.488772 | -18.8834 | 7.73E-54  | 6.26E-53  | 110.0801 |
| N4BP3        | 1.06749  | 0.83211  | 29.51722 | 5.20E-93  | 1.52E-91  | 200.3926 |
| NHP2         | 1.223853 | 5.96538  | 17.93808 | 3.58E-50  | 2.66E-49  | 101.6396 |
| HNRNPAB      | 2.384181 | 5.596189 | 34.82956 | 1.90E-110 | 1.47E-108 | 240.6233 |
| ADAMTS2      | 2.749216 | 2.977027 | 28.39486 | 3.94E-89  | 9.58E-88  | 191.4421 |
| P11-798K23.  | 1.315597 | 1.085488 | 19.18228 | 5.39E-55  | 4.49E-54  | 112.7449 |
| RUFY1        | 1.391338 | 4.485498 | 23.2705  | 1.38E-70  | 1.75E-69  | 148.6754 |
| CANX         | 1.034208 | 6.890651 | 12.18811 | 2.73E-28  | 1.30E-27  | 51.32181 |
| LTC4S        | 1.169443 | 1.88853  | 14.94094 | 1.37E-38  | 8.02E-38  | 74.98626 |
| MGAT4B       | 2.337952 | 6.114221 | 27.98093 | 1.11E-87  | 2.50E-86  | 188.1017 |
| SQSTM1       | 1.700414 | 7.417612 | 19.37979 | 9.28E-56  | 7.85E-55  | 114.5042 |
| GFPT2        | 2.191394 | 2.626547 | 20.94606 | 8.74E-62  | 8.61E-61  | 128.3888 |
| CNOT6        | 1.419653 | 2.289328 | 28.0851  | 4.77E-88  | 1.10E-86  | 188.9444 |
| SCGB3A1      | 1.17535  | 2.057799 | 5.750781 | 2.09E-08  | 6.03E-08  | 5.984725 |
| LINC00847    | 1.147591 | 3.057792 | 20.82975 | 2.44E-61  | 2.38E-60  | 127.3627 |
| BTNL8        | 1.891126 | 1.306668 | 14.43755 | 1.14E-36  | 6.41E-36  | 70.5711  |
| BTNL9        | -1.20788 | 2.633781 | -12.5661 | 1.14E-29  | 5.57E-29  | 54.48718 |
| AC138035.2   | -1.09729 | 2.110126 | -15.255  | 8.55E-40  | 5.13E-39  | 77.75448 |
| EXOC2        | 1.254016 | 2.402974 | 26.34521 | 7.16E-82  | 1.31E-80  | 174.6984 |
| FOXQ1        | 2.858782 | 2.12708  | 32.31823 | 2.15E-102 | 1.03E-100 | 222.0432 |
| FOXF2        | 1.89226  | 1.376516 | 31.8444  | 7.75E-101 | 3.38E-99  | 218.4498 |
| FOXC1        | 1.924509 | 1.891047 | 30.79576 | 2.40E-97  | 8.73E-96  | 210.3971 |
| GMDS         | 1.676897 | 4.975819 | 18.0567  | 1.24E-50  | 9.30E-50  | 102.6994 |
| WRNIP1       | 1.157448 | 4.592048 | 20.21615 | 5.53E-59  | 5.05E-58  | 121.9349 |
| SERPINB9P1   | 1.042219 | 1.034602 | 15.36755 | 3.16E-40  | 1.92E-39  | 78.7485  |
| SERPINB9     | 2.245582 | 1.932756 | 32.63774 | 1.94E-103 | 9.90E-102 | 224.4505 |
| SERPINB6     | 1.192118 | 6.713991 | 15.49841 | 9.92E-41  | 6.06E-40  | 79.90577 |
| BPHL         | 1.006864 | 3.535378 | 18.7124  | 3.55E-53  | 2.82E-52  | 108.5548 |
| TUBB2A       | 1.434081 | 4.56922  | 17.76921 | 1.62E-49  | 1.19E-48  | 100.1308 |
| TUBB2B       | 1.023795 | 2.313623 | 11.84517 | 4.73E-27  | 2.19E-26  | 48.48079 |
| PXDC1        | 2.362234 | 4.009613 | 31.37243 | 2.84E-99  | 1.13E-97  | 214.8425 |
| RP11-420L9.5 | 1.28052  | 1.236533 | 31.62041 | 4.26E-100 | 1.79E-98  | 216.7413 |
| CDYL         | 1.806746 | 2.395958 | 35.58792 | 8.21E-113 | 7.32E-111 | 246.0819 |
| FARS2        | 1.315361 | 2.733324 | 29.51922 | 5.12E-93  | 1.50E-91  | 200.4085 |
| F13A1        | 2.25651  | 2.846252 | 18.2921  | 1.51E-51  | 1.16E-50  | 104.8022 |
| LY86         | 2.758112 | 1.987139 | 31.50369 | 1.04E-99  | 4.25E-98  | 215.8486 |
| SSR1         | 1.017762 | 4.885491 | 14.44818 | 1.04E-36  | 5.84E-36  | 70.66406 |
| BLOC1S5      | 1.330951 | 2.059438 | 30.05322 | 7.71E-95  | 2.48E-93  | 204.6117 |
| TFAP2A       | 2.634224 | 1.480937 | 33.22533 | 2.42E-105 | 1.38E-103 | 228.8444 |
| GCNT2        | 1.003169 | 1.357495 | 18.61456 | 8.51E-53  | 6.71E-52  | 107.6815 |
| PAK1IP1      | 1.185464 | 2.678175 | 22.97264 | 1.81E-69  | 2.20E-68  | 146.1022 |
| TMEM14C      | 1.805567 | 5.841824 | 28.24528 | 1.31E-88  | 3.11E-87  | 190.2374 |
| TMEM14B      | 1.394935 | 5.178925 | 22.96873 | 1.87E-69  | 2.28E-68  | 146.0683 |
| SMIM13       | 1.016154 | 1.581879 | 25.02905 | 4.27E-77  | 6.63E-76  | 163.6854 |
| NEDD9        | 2.350662 | 3.19592  | 29.16174 | 8.66E-92  | 2.41E-90  | 197.5747 |
| ADTRP        | 2.389329 | 1.327171 | 25.09003 | 2.55E-77  | 4.01E-76  | 164.2    |
| HIVEP1       | 1.144696 | 2.342663 | 20.61631 | 1.60E-60  | 1.53E-59  | 125.4772 |
| EDN1         | 1.871509 | 2.601947 | 21.58876 | 3.08E-64  | 3.24E-63  | 134.042  |

|             |           |           |           |            |            |           |
|-------------|-----------|-----------|-----------|------------|------------|-----------|
| RPL15P3     | 1. 36975  | 3. 293057 | 22. 6179  | 3. 90E-68  | 4. 57E-67  | 143. 0267 |
| TBC1D7      | 1. 64954  | 3. 019987 | 32. 67188 | 1. 50E-103 | 7. 76E-102 | 224. 707  |
| NOL7        | 1. 05209  | 4. 793871 | 17. 79285 | 1. 31E-49  | 9. 64E-49  | 100. 342  |
| RANBP9      | 1. 071228 | 3. 567483 | 18. 29136 | 1. 52E-51  | 1. 17E-50  | 104. 7956 |
| MCUR1       | 1. 103443 | 2. 949312 | 22. 13645 | 2. 57E-66  | 2. 86E-65  | 138. 8346 |
| CD83        | 2. 186449 | 1. 825508 | 28. 365   | 5. 01E-89  | 1. 21E-87  | 191. 2018 |
| JARID2      | 1. 162701 | 1. 745944 | 24. 49676 | 3. 85E-75  | 5. 63E-74  | 159. 1764 |
| DTNBP1      | 1. 587633 | 3. 354272 | 28. 93962 | 5. 06E-91  | 1. 35E-89  | 195. 8059 |
| ATXN1       | 1. 364828 | 2. 417813 | 23. 70294 | 3. 36E-72  | 4. 44E-71  | 152. 3961 |
| KIF13A      | 1. 524092 | 3. 044737 | 25. 94659 | 1. 96E-80  | 3. 40E-79  | 171. 384  |
| TPMT        | 1. 614723 | 2. 817461 | 29. 35683 | 1. 85E-92  | 5. 27E-91  | 199. 1232 |
| KDM1B       | 1. 166513 | 2. 228604 | 20. 23228 | 4. 79E-59  | 4. 38E-58  | 122. 0779 |
| DEK         | 1. 666521 | 4. 305521 | 24. 57882 | 1. 92E-75  | 2. 84E-74  | 159. 8736 |
| RNF144B     | 1. 289111 | 1. 790076 | 23. 78596 | 1. 65E-72  | 2. 21E-71  | 153. 1083 |
| MBOAT1      | 1. 250389 | 2. 226381 | 16. 98263 | 1. 82E-46  | 1. 26E-45  | 93. 10563 |
| E2F3        | 1. 905451 | 1. 597527 | 38. 596   | 6. 67E-122 | 1. 06E-119 | 267. 06   |
| SOX4        | 2. 370834 | 3. 288012 | 29. 60008 | 2. 70E-93  | 8. 06E-92  | 201. 0472 |
| CASC15      | 1. 067224 | 0. 871827 | 23. 02139 | 1. 18E-69  | 1. 45E-68  | 146. 5239 |
| TDP2        | 1. 398974 | 3. 956879 | 23. 22045 | 2. 13E-70  | 2. 67E-69  | 148. 2437 |
| ACOT13      | 1. 609081 | 3. 089794 | 31. 23239 | 8. 29E-99  | 3. 24E-97  | 213. 7668 |
| GMNN        | -1. 00436 | 4. 615475 | -13. 5991 | 1. 67E-33  | 8. 86E-33  | 63. 29114 |
| FAM65B      | 1. 168322 | 1. 005882 | 13. 94063 | 8. 68E-35  | 4. 71E-34  | 66. 24397 |
| CMAHP       | 1. 336724 | 2. 593095 | 15. 22977 | 1. 07E-39  | 6. 40E-39  | 77. 53156 |
| LRRC16A     | 1. 767252 | 2. 517863 | 30. 81983 | 1. 99E-97  | 7. 28E-96  | 210. 5835 |
| SLC17A4     | -1. 68236 | 2. 1861   | -16. 9357 | 2. 77E-46  | 1. 90E-45  | 92. 68654 |
| TRIM38      | 1. 363997 | 1. 767197 | 30. 6167  | 9. 58E-97  | 3. 38E-95  | 209. 0083 |
| HIST1H1C    | 2. 013194 | 5. 126089 | 15. 49719 | 1. 00E-40  | 6. 13E-40  | 79. 89497 |
| HFE         | 1. 085293 | 2. 112104 | 18. 66478 | 5. 43E-53  | 4. 31E-52  | 108. 1297 |
| HIST1H2BC   | 2. 187783 | 1. 770627 | 22. 41477 | 2. 27E-67  | 2. 61E-66  | 141. 2604 |
| HIST1H2AC   | 2. 719221 | 3. 555326 | 24. 69611 | 7. 11E-76  | 1. 06E-74  | 160. 8687 |
| U91328. 1   | 1. 804011 | 1. 311818 | 10. 85392 | 1. 50E-23  | 6. 44E-23  | 40. 45641 |
| HIST1H2BD   | 2. 594435 | 3. 313011 | 19. 97185 | 4. 82E-58  | 4. 30E-57  | 119. 7678 |
| HIST1H3D    | 1. 035637 | 0. 690247 | 13. 76799 | 3. 88E-34  | 2. 08E-33  | 64. 74891 |
| HIST1H2AE   | 1. 216522 | 0. 956845 | 12. 59885 | 8. 65E-30  | 4. 24E-29  | 54. 76257 |
| HIST1H4H    | 1. 918345 | 1. 310648 | 20. 57373 | 2. 34E-60  | 2. 22E-59  | 125. 1007 |
| BTN3A2      | 1. 864517 | 3. 388426 | 22. 15553 | 2. 17E-66  | 2. 43E-65  | 139. 0011 |
| BTN2A2      | 1. 327423 | 2. 271033 | 21. 04972 | 3. 51E-62  | 3. 49E-61  | 129. 3026 |
| BTN3A1      | 1. 202989 | 3. 463924 | 15. 22718 | 1. 09E-39  | 6. 55E-39  | 77. 50875 |
| BTN3A3      | 1. 850871 | 2. 730787 | 15. 94765 | 1. 84E-42  | 1. 17E-41  | 83. 88838 |
| BTN2A1      | 1. 524132 | 3. 181792 | 24. 71065 | 6. 29E-76  | 9. 42E-75  | 160. 992  |
| HCG11       | 1. 193961 | 1. 106229 | 21. 43057 | 1. 23E-63  | 1. 28E-62  | 132. 6534 |
| CTA-14H9. 5 | 1. 799372 | 1. 616381 | 25. 4212  | 1. 58E-78  | 2. 59E-77  | 166. 9874 |
| HMGN4       | 2. 057651 | 4. 368915 | 28. 59396 | 7. 99E-90  | 2. 01E-88  | 193. 0412 |
| ABT1        | 1. 380441 | 2. 809656 | 30. 56386 | 1. 44E-96  | 5. 05E-95  | 208. 5978 |
| ZNF322      | 1. 142534 | 2. 242478 | 23. 14958 | 3. 92E-70  | 4. 88E-69  | 147. 6318 |
| HIST1H2BJ   | 1. 764222 | 1. 122393 | 21. 29655 | 4. 00E-63  | 4. 08E-62  | 131. 4755 |
| HIST1H2BK   | 2. 124209 | 5. 258077 | 19. 38042 | 9. 23E-56  | 7. 81E-55  | 114. 5098 |
| ZNF184      | 1. 047691 | 1. 495807 | 25. 50041 | 8. 13E-79  | 1. 34E-77  | 167. 6522 |
| HIST1H3H    | 1. 653639 | 0. 904841 | 20. 08241 | 1. 81E-58  | 1. 63E-57  | 120. 749  |
| HIST1H4J    | 2. 381113 | 1. 637851 | 31. 43293 | 1. 78E-99  | 7. 23E-98  | 215. 3065 |
| OR2I1P      | 2. 28525  | 2. 121462 | 17. 26534 | 1. 46E-47  | 1. 03E-46  | 95. 62958 |
| UBD         | 4. 315483 | 4. 573592 | 27. 21662 | 5. 52E-85  | 1. 12E-83  | 181. 879  |
| SUMO2P1     | 1. 009841 | 1. 066242 | 10. 28222 | 1. 36E-21  | 5. 60E-21  | 35. 97402 |
| HLA-F       | 3. 508536 | 5. 430101 | 35. 16634 | 1. 68E-111 | 1. 39E-109 | 243. 056  |

|             |          |          |          |           |           |          |
|-------------|----------|----------|----------|-----------|-----------|----------|
| HLA-V       | 1.238832 | 0.949478 | 18.06011 | 1.20E-50  | 9.02E-50  | 102.7298 |
| HLA-G       | 1.548895 | 1.161009 | 13.29231 | 2.35E-32  | 1.22E-31  | 60.65486 |
| HLA-H       | 3.638581 | 3.667587 | 35.37433 | 3.78E-112 | 3.25E-110 | 244.5515 |
| HLA-K       | 1.354372 | 1.470409 | 15.73406 | 1.23E-41  | 7.65E-41  | 81.99309 |
| HLA-A       | 4.244341 | 7.960842 | 41.12396 | 3.41E-129 | 9.09E-127 | 283.8876 |
| HCG4P5      | 1.441015 | 1.216963 | 16.60009 | 5.53E-45  | 3.69E-44  | 89.69368 |
| ZNRD1       | 1.677194 | 4.41418  | 26.45577 | 2.87E-82  | 5.31E-81  | 175.6144 |
| PPP1R11     | 1.783869 | 4.938671 | 28.4191  | 3.25E-89  | 7.94E-88  | 191.637  |
| RNF39       | 1.810177 | 1.57682  | 20.48063 | 5.32E-60  | 5.00E-59  | 124.2772 |
| TRIM31      | 3.958807 | 2.129379 | 32.57184 | 3.19E-103 | 1.60E-101 | 223.955  |
| TRIM15      | 3.225818 | 1.644145 | 34.68668 | 5.35E-110 | 4.02E-108 | 239.5869 |
| TRIM26      | 1.665376 | 3.791527 | 29.38627 | 1.46E-92  | 4.20E-91  | 199.3564 |
| RPP21       | 1.083491 | 5.266234 | 15.82121 | 5.66E-42  | 3.55E-41  | 82.76613 |
| HLA-E       | 2.751069 | 7.136698 | 30.26141 | 1.52E-95  | 5.04E-94  | 206.2408 |
| GNL1        | 1.12946  | 5.165207 | 16.79731 | 9.52E-46  | 6.47E-45  | 91.45218 |
| ABCF1       | 1.195152 | 4.364113 | 20.56629 | 2.49E-60  | 2.36E-59  | 125.035  |
| PPP1R18     | 3.064901 | 4.310327 | 35.22795 | 1.08E-111 | 9.10E-110 | 243.4995 |
| NRM         | 1.83152  | 3.369664 | 31.60755 | 4.70E-100 | 1.97E-98  | 216.643  |
| TUBB        | 2.513851 | 6.798059 | 29.64862 | 1.85E-93  | 5.55E-92  | 201.4303 |
| FLOT1       | 1.77021  | 6.241812 | 22.5433  | 7.45E-68  | 8.66E-67  | 142.3784 |
| IER3        | 2.340611 | 5.993972 | 19.08655 | 1.26E-54  | 1.04E-53  | 111.8918 |
| DDR1        | 1.475785 | 6.093788 | 16.98137 | 1.84E-46  | 1.27E-45  | 93.09434 |
| SFTA2       | 4.536546 | 3.553055 | 32.83615 | 4.40E-104 | 2.32E-102 | 225.9389 |
| DPCR1       | 4.699221 | 2.369351 | 23.93737 | 4.52E-73  | 6.15E-72  | 154.4053 |
| C6orf15     | 1.335865 | 0.641269 | 10.36019 | 7.39E-22  | 3.07E-21  | 36.57838 |
| PSORS1C1    | 2.755305 | 1.881403 | 27.61731 | 2.11E-86  | 4.54E-85  | 185.1501 |
| TCF19       | 1.632528 | 1.87844  | 32.14087 | 8.19E-102 | 3.78E-100 | 220.7015 |
| HLA-C       | 3.049335 | 7.906688 | 29.07605 | 1.71E-91  | 4.69E-90  | 196.893  |
| HLA-B       | 3.787168 | 8.490083 | 35.19629 | 1.36E-111 | 1.13E-109 | 243.2717 |
| MICA        | 1.283215 | 3.642607 | 17.339   | 7.55E-48  | 5.35E-47  | 96.28745 |
| HCP5        | 2.909338 | 2.815842 | 35.73147 | 2.95E-113 | 2.72E-111 | 247.1074 |
| MICB        | 1.5242   | 1.186191 | 25.13237 | 1.79E-77  | 2.82E-76  | 164.557  |
| LTB         | 3.577565 | 2.615057 | 28.88349 | 7.91E-91  | 2.10E-89  | 195.358  |
| LST1        | 3.563119 | 3.195701 | 36.51101 | 1.19E-115 | 1.29E-113 | 252.633  |
| AIF1        | 3.456751 | 3.985008 | 33.07719 | 7.29E-105 | 4.04E-103 | 227.7406 |
| PRRC2A      | 1.12377  | 5.57394  | 14.79354 | 5.00E-38  | 2.91E-37  | 73.69045 |
| BAG6        | 1.365351 | 6.486394 | 18.36412 | 7.96E-52  | 6.15E-51  | 105.4455 |
| C6orf47     | 1.772434 | 3.356314 | 35.17666 | 1.56E-111 | 1.30E-109 | 243.1303 |
| GPANK1      | 1.100675 | 3.242638 | 23.14486 | 4.08E-70  | 5.08E-69  | 147.5911 |
| CSNK2B      | 1.45407  | 6.606021 | 20.77407 | 3.98E-61  | 3.86E-60  | 126.8711 |
| ABHD16A     | 1.247678 | 4.689689 | 19.71703 | 4.63E-57  | 4.05E-56  | 117.5043 |
| DDAH2       | 2.987031 | 4.786345 | 37.02386 | 3.29E-117 | 3.86E-115 | 256.2287 |
| CLIC1       | 3.4808   | 7.419984 | 39.47056 | 1.85E-124 | 3.41E-122 | 272.9624 |
| MSH5-SAPCD1 | 1.056829 | 1.816945 | 15.50509 | 9.35E-41  | 5.72E-40  | 79.96488 |
| VWA7        | 1.015312 | 1.93724  | 14.54071 | 4.61E-37  | 2.62E-36  | 71.4735  |
| VAR5        | 1.127269 | 4.733194 | 16.40093 | 3.26E-44  | 2.14E-43  | 87.9195  |
| LSM2        | 1.639659 | 4.786524 | 26.13777 | 4.00E-81  | 7.10E-80  | 172.9758 |
| HSPA1A      | 2.219774 | 6.207848 | 11.87401 | 3.72E-27  | 1.73E-26  | 48.71853 |
| HSPA1B      | 1.823171 | 6.139409 | 9.621148 | 2.15E-19  | 8.44E-19  | 30.94526 |
| C6orf48     | 1.0762   | 6.587501 | 12.96751 | 3.78E-31  | 1.91E-30  | 57.88297 |
| NEU1        | 1.277462 | 4.527877 | 19.3377  | 1.35E-55  | 1.14E-54  | 114.1293 |
| SLC44A4     | 4.580288 | 4.35522  | 38.42336 | 2.16E-121 | 3.34E-119 | 265.8845 |
| EHMT2       | 1.30471  | 4.206987 | 21.0659  | 3.04E-62  | 3.03E-61  | 129.4452 |
| C2          | 3.586171 | 2.636872 | 41.71242 | 7.58E-131 | 2.26E-128 | 287.7039 |

|             |           |           |           |            |            |           |
|-------------|-----------|-----------|-----------|------------|------------|-----------|
| ZBTB12      | 1. 136887 | 1. 373057 | 24. 31993 | 1. 73E-74  | 2. 47E-73  | 157. 6718 |
| CFB         | 2. 622697 | 5. 742563 | 19. 00972 | 2. 51E-54  | 2. 05E-53  | 111. 2068 |
| NELFE       | 1. 322863 | 5. 409383 | 21. 20796 | 8. 72E-63  | 8. 83E-62  | 130. 6961 |
| C4A         | 1. 624836 | 5. 744853 | 10. 18929 | 2. 79E-21  | 1. 15E-20  | 35. 25668 |
| C4B         | 1. 685261 | 5. 739659 | 10. 46926 | 3. 15E-22  | 1. 31E-21  | 37. 42761 |
| TNXB        | 1. 1549   | 2. 740229 | 10. 8658  | 1. 36E-23  | 5. 87E-23  | 40. 55074 |
| ATF6B       | 1. 191614 | 5. 184823 | 17. 9342  | 3. 70E-50  | 2. 75E-49  | 101. 6049 |
| FKBPL       | 1. 172511 | 2. 14417  | 26. 76823 | 2. 18E-83  | 4. 21E-82  | 178. 1954 |
| AGPAT1      | 1. 835137 | 4. 732218 | 30. 56904 | 1. 39E-96  | 4. 86E-95  | 208. 638  |
| RNF5        | 1. 702219 | 4. 828344 | 30. 02729 | 9. 44E-95  | 3. 03E-93  | 204. 4085 |
| GPSM3       | 3. 262663 | 3. 333051 | 37. 45252 | 1. 68E-118 | 2. 16E-116 | 259. 2105 |
| HLA-DRA     | 4. 86205  | 6. 859413 | 38. 75395 | 2. 29E-122 | 3. 73E-120 | 268. 1324 |
| HLA-DRB5    | 4. 090163 | 3. 829137 | 21. 08653 | 2. 54E-62  | 2. 53E-61  | 129. 6269 |
| HLA-DRB6    | 3. 779926 | 2. 264867 | 41. 96844 | 1. 46E-131 | 4. 81E-129 | 289. 3527 |
| HLA-DRB1    | 4. 36525  | 5. 804988 | 34. 92442 | 9. 60E-111 | 7. 58E-109 | 241. 3099 |
| HLA-DQA1    | 4. 565522 | 3. 569158 | 32. 97335 | 1. 58E-104 | 8. 57E-103 | 226. 9654 |
| HLA-DQB1    | 4. 129937 | 4. 152486 | 22. 99937 | 1. 43E-69  | 1. 75E-68  | 146. 3335 |
| HLA-DQA2    | 2. 959661 | 1. 72675  | 25. 69487 | 1. 60E-79  | 2. 70E-78  | 169. 2814 |
| HLA-DQB2    | 3. 142775 | 1. 738917 | 33. 25083 | 2. 00E-105 | 1. 14E-103 | 229. 0341 |
| HLA-DOB     | 1. 87086  | 1. 242582 | 20. 30706 | 2. 47E-59  | 2. 28E-58  | 122. 7405 |
| ac-BPG246D1 | 1. 799269 | 1. 091265 | 22. 9791  | 1. 71E-69  | 2. 08E-68  | 146. 1581 |
| TAP2        | 2. 473097 | 3. 870128 | 30. 08649 | 5. 94E-95  | 1. 92E-93  | 204. 8724 |
| PSMB8       | 3. 224707 | 5. 189217 | 38. 70088 | 3. 28E-122 | 5. 30E-120 | 267. 7724 |
| PSMB8-AS1   | 2. 634449 | 3. 191922 | 33. 23964 | 2. 18E-105 | 1. 24E-103 | 228. 9508 |
| PSMB9       | 4. 036029 | 4. 32485  | 43. 27895 | 3. 59E-135 | 1. 59E-132 | 297. 684  |
| TAP1        | 2. 93943  | 4. 357403 | 34. 63756 | 7. 64E-110 | 5. 71E-108 | 239. 2302 |
| HLA-DMB     | 3. 694636 | 3. 96998  | 35. 5196  | 1. 34E-112 | 1. 17E-110 | 245. 593  |
| HLA-DMA     | 3. 312566 | 4. 970264 | 33. 80427 | 3. 36E-107 | 2. 13E-105 | 233. 1317 |
| HLA-DOA     | 2. 83171  | 2. 192827 | 29. 78945 | 6. 10E-94  | 1. 88E-92  | 202. 54   |
| HLA-DPA1    | 4. 158427 | 5. 358394 | 35. 4027  | 3. 08E-112 | 2. 66E-110 | 244. 7551 |
| HLA-DPB1    | 4. 108533 | 5. 663815 | 37. 19499 | 1. 00E-117 | 1. 22E-115 | 257. 4217 |
| HLA-DPB2    | 1. 244155 | 0. 627413 | 18. 87908 | 8. 03E-54  | 6. 50E-53  | 110. 0418 |
| SLC39A7     | 1. 351651 | 6. 27789  | 20. 03721 | 2. 70E-58  | 2. 43E-57  | 120. 348  |
| B3GALT4     | 2. 532751 | 2. 527312 | 42. 94523 | 2. 93E-134 | 1. 23E-131 | 295. 5794 |
| WDR46       | 1. 291345 | 4. 695277 | 19. 9359  | 6. 63E-58  | 5. 91E-57  | 119. 4488 |
| PFDN6       | 1. 742254 | 5. 345273 | 26. 96627 | 4. 29E-84  | 8. 48E-83  | 179. 8252 |
| TAPBP       | 2. 359676 | 5. 300144 | 28. 71785 | 2. 97E-90  | 7. 65E-89  | 194. 0339 |
| ZBTB22      | 1. 089069 | 2. 952902 | 23. 1109  | 5. 47E-70  | 6. 79E-69  | 147. 2977 |
| DAXX        | 1. 597046 | 4. 284387 | 26. 54578 | 1. 36E-82  | 2. 56E-81  | 176. 3591 |
| KIFC1       | 2. 534367 | 1. 552689 | 41. 71612 | 7. 40E-131 | 2. 22E-128 | 287. 7278 |
| CUTA        | 1. 403765 | 6. 880031 | 19. 57209 | 1. 68E-56  | 1. 45E-55  | 116. 2155 |
| ZBTB9       | 1. 092223 | 1. 659453 | 27. 13385 | 1. 09E-84  | 2. 19E-83  | 181. 2008 |
| BAK1        | 2. 262681 | 3. 562402 | 35. 96118 | 5. 77E-114 | 5. 64E-112 | 248. 7432 |
| ITPR3       | 2. 435204 | 3. 648945 | 28. 39294 | 4. 00E-89  | 9. 72E-88  | 191. 4266 |
| UQCC2       | 1. 497794 | 5. 292067 | 23. 06386 | 8. 21E-70  | 1. 01E-68  | 146. 8911 |
| HMGAI       | 3. 807227 | 5. 401868 | 42. 23003 | 2. 74E-132 | 9. 54E-130 | 291. 0301 |
| C6orf1      | 2. 03884  | 4. 080433 | 28. 10024 | 4. 22E-88  | 9. 76E-87  | 189. 0667 |
| NUDT3       | 1. 00596  | 2. 598562 | 17. 81387 | 1. 08E-49  | 8. 00E-49  | 100. 5298 |
| RPS10-NUDT3 | 1. 902122 | 2. 576499 | 23. 26282 | 1. 48E-70  | 1. 86E-69  | 148. 6092 |
| SPDEF       | 3. 635735 | 2. 025238 | 35. 05266 | 3. 81E-111 | 3. 09E-109 | 242. 2364 |
| C6orf106    | 1. 766326 | 4. 330324 | 28. 98311 | 3. 58E-91  | 9. 66E-90  | 196. 1528 |
| SNRPC       | 1. 331373 | 5. 829857 | 19. 70361 | 5. 21E-57  | 4. 55E-56  | 117. 385  |
| ANKS1A      | 1. 106216 | 2. 607325 | 19. 23565 | 3. 35E-55  | 2. 80E-54  | 113. 2204 |
| SCUBE3      | 1. 200976 | 0. 627321 | 16. 11    | 4. 35E-43  | 2. 79E-42  | 85. 33095 |

|              |           |           |           |            |            |           |
|--------------|-----------|-----------|-----------|------------|------------|-----------|
| PPARD        | 1. 927149 | 3. 32698  | 29. 03834 | 2. 31E-91  | 6. 28E-90  | 196. 5928 |
| TEAD3        | 2. 033569 | 3. 334612 | 28. 75314 | 2. 24E-90  | 5. 80E-89  | 194. 3162 |
| CLPSL2       | -1. 21664 | 0. 920071 | -19. 2029 | 4. 48E-55  | 3. 74E-54  | 112. 929  |
| CLPSL1       | -3. 39557 | 2. 77877  | -13. 6258 | 1. 33E-33  | 7. 05E-33  | 63. 52119 |
| CLPS         | -9. 37999 | 10. 42368 | -23. 4635 | 2. 63E-71  | 3. 38E-70  | 150. 338  |
| LHFPL5       | -1. 23615 | 0. 868051 | -29. 2975 | 2. 95E-92  | 8. 36E-91  | 198. 6529 |
| MAPK14       | 1. 101045 | 3. 631251 | 19. 06809 | 1. 49E-54  | 1. 23E-53  | 111. 7273 |
| C6orf222     | 1. 783159 | 1. 457625 | 15. 59553 | 4. 20E-41  | 2. 58E-40  | 80. 7655  |
| ETV7         | 2. 286513 | 1. 742106 | 31. 6335  | 3. 86E-100 | 1. 63E-98  | 216. 8414 |
| KCTD20       | 1. 630277 | 3. 16857  | 25. 70293 | 1. 49E-79  | 2. 52E-78  | 169. 3488 |
| STK38        | 2. 235369 | 3. 54602  | 36. 54184 | 9. 58E-116 | 1. 05E-113 | 252. 85   |
| SRSF3        | 1. 563797 | 6. 599764 | 20. 07336 | 1. 96E-58  | 1. 77E-57  | 120. 6687 |
| CDKN1A       | 1. 477778 | 5. 914275 | 13. 22467 | 4. 20E-32  | 2. 16E-31  | 60. 07599 |
| CPNE5        | 1. 68154  | 1. 224724 | 24. 91092 | 1. 16E-76  | 1. 78E-75  | 162. 6874 |
| PPIL1        | 1. 252091 | 3. 459335 | 19. 40897 | 7. 16E-56  | 6. 08E-55  | 114. 7639 |
| PI16         | 1. 188331 | 1. 230161 | 9. 006485 | 2. 02E-17  | 7. 59E-17  | 26. 43608 |
| FGD2         | 1. 284464 | 1. 988167 | 14. 79702 | 4. 85E-38  | 2. 82E-37  | 73. 72102 |
| PIM1         | 2. 19248  | 4. 022081 | 20. 82783 | 2. 48E-61  | 2. 42E-60  | 127. 3457 |
| RNF8         | 1. 449853 | 2. 842685 | 31. 56337 | 6. 59E-100 | 2. 73E-98  | 216. 3052 |
| CCDC167      | 1. 738875 | 3. 692415 | 28. 14655 | 2. 91E-88  | 6. 77E-87  | 189. 4408 |
| MDGA1        | 1. 204945 | 1. 099439 | 18. 99801 | 2. 78E-54  | 2. 27E-53  | 111. 1025 |
| ZFAND3       | 1. 562969 | 4. 628808 | 21. 7302  | 8. 92E-65  | 9. 54E-64  | 135. 282  |
| BTBD9        | 1. 04323  | 1. 524497 | 25. 91046 | 2. 65E-80  | 4. 57E-79  | 171. 0826 |
| GLO1         | 1. 812426 | 4. 667096 | 30. 52673 | 1. 92E-96  | 6. 68E-95  | 208. 309  |
| SAYS1        | 1. 014622 | 2. 887998 | 22. 67397 | 2. 40E-68  | 2. 83E-67  | 143. 5135 |
| KCNK5        | 1. 126987 | 3. 532065 | 12. 29294 | 1. 14E-28  | 5. 46E-28  | 52. 19617 |
| NFYA         | 1. 118814 | 2. 819842 | 18. 33061 | 1. 07E-51  | 8. 27E-51  | 105. 1462 |
| TREM2        | 3. 359526 | 2. 72473  | 32. 90814 | 2. 57E-104 | 1. 37E-102 | 226. 4778 |
| TREM1        | 3. 398862 | 2. 036573 | 32. 91262 | 2. 48E-104 | 1. 33E-102 | 226. 5113 |
| MDFI         | 3. 789898 | 2. 922008 | 45. 58466 | 2. 46E-141 | 1. 81E-138 | 311. 9148 |
| TFEB         | 2. 042576 | 3. 474206 | 30. 0405  | 8. 52E-95  | 2. 74E-93  | 204. 512  |
| PRICKLE4     | 1. 017979 | 2. 801772 | 11. 99051 | 1. 42E-27  | 6. 66E-27  | 49. 68109 |
| TOMM6        | 1. 361576 | 6. 799072 | 19. 71768 | 4. 60E-57  | 4. 02E-56  | 117. 5101 |
| MED20        | 1. 137874 | 2. 684506 | 23. 86796 | 8. 18E-73  | 1. 11E-71  | 153. 8109 |
| BYSL         | 1. 431392 | 3. 128905 | 23. 94827 | 4. 12E-73  | 5. 61E-72  | 154. 4985 |
| CCND3        | 2. 295771 | 4. 812295 | 28. 41074 | 3. 47E-89  | 8. 47E-88  | 191. 5698 |
| TAF8         | 1. 449654 | 2. 563758 | 30. 18572 | 2. 74E-95  | 9. 00E-94  | 205. 6492 |
| RP11-7K24. 3 | 1. 312397 | 1. 059317 | 21. 09938 | 2. 27E-62  | 2. 27E-61  | 129. 7401 |
| C6orf132     | 1. 495825 | 3. 537425 | 19. 45305 | 4. 84E-56  | 4. 13E-55  | 115. 1563 |
| MRPS10       | 1. 691959 | 3. 595841 | 31. 98445 | 2. 68E-101 | 1. 20E-99  | 219. 5148 |
| TRERF1       | 1. 330626 | 1. 35248  | 27. 46901 | 7. 04E-86  | 1. 49E-84  | 183. 9416 |
| TBCC         | 1. 467469 | 3. 332683 | 26. 90517 | 7. 08E-84  | 1. 39E-82  | 179. 323  |
| RPL7L1       | 1. 231193 | 4. 394841 | 20. 77871 | 3. 82E-61  | 3. 71E-60  | 126. 9121 |
| GNMT         | -5. 64637 | 4. 249355 | -30. 0185 | 1. 01E-94  | 3. 24E-93  | 204. 3396 |
| PPP2R5D      | 1. 078798 | 3. 718111 | 19. 41524 | 6. 77E-56  | 5. 75E-55  | 114. 8197 |
| MEA1         | 1. 691896 | 4. 989069 | 30. 29492 | 1. 17E-95  | 3. 89E-94  | 206. 5025 |
| KLHDC3       | 1. 336816 | 4. 930383 | 22. 25607 | 9. 05E-67  | 1. 02E-65  | 139. 878  |
| RRP36        | 1. 265212 | 4. 596491 | 22. 63191 | 3. 45E-68  | 4. 06E-67  | 143. 1483 |
| KLC4         | 1. 163867 | 4. 214323 | 16. 57501 | 6. 91E-45  | 4. 61E-44  | 89. 47018 |
| PTK7         | 2. 912058 | 4. 32094  | 31. 61448 | 4. 46E-100 | 1. 87E-98  | 216. 696  |
| SRF          | 1. 443243 | 3. 494795 | 23. 10307 | 5. 85E-70  | 7. 25E-69  | 147. 2301 |
| POLR1C       | 1. 147099 | 3. 889615 | 19. 54232 | 2. 19E-56  | 1. 88E-55  | 115. 9506 |
| MAD2L1BP     | 1. 765507 | 3. 554853 | 32. 50665 | 5. 20E-103 | 2. 58E-101 | 223. 4644 |
| MRPS18A      | 1. 753919 | 4. 493268 | 32. 21652 | 4. 62E-102 | 2. 17E-100 | 221. 2742 |

|              |           |           |           |            |            |           |
|--------------|-----------|-----------|-----------|------------|------------|-----------|
| RP1-261G23.7 | 1. 218421 | 4. 873965 | 8. 855929 | 6. 00E-17  | 2. 23E-16  | 25. 35818 |
| C6orf223     | 2. 093139 | 1. 335352 | 23. 66422 | 4. 69E-72  | 6. 15E-71  | 152. 0637 |
| MRPL14       | 2. 496624 | 4. 47861  | 41. 93668 | 1. 79E-131 | 5. 80E-129 | 289. 1485 |
| TMEM63B      | 1. 883095 | 3. 530478 | 31. 27178 | 6. 13E-99  | 2. 41E-97  | 214. 0696 |
| SLC35B2      | 1. 693457 | 4. 745815 | 28. 77011 | 1. 95E-90  | 5. 08E-89  | 194. 452  |
| NFKBIE       | 2. 67227  | 3. 166704 | 38. 31656 | 4. 46E-121 | 6. 74E-119 | 265. 1557 |
| CDC5L        | 1. 268752 | 2. 531489 | 26. 26518 | 1. 39E-81  | 2. 51E-80  | 174. 0344 |
| RUNX2        | 2. 417891 | 1. 526213 | 33. 93391 | 1. 30E-107 | 8. 39E-106 | 234. 086  |
| CLIC5        | 1. 57609  | 1. 279075 | 21. 53669 | 4. 86E-64  | 5. 09E-63  | 133. 5852 |
| RCAN2        | 1. 380107 | 2. 182778 | 18. 25228 | 2. 16E-51  | 1. 65E-50  | 104. 4465 |
| SLC25A27     | -1. 62729 | 3. 233415 | -18. 7834 | 1. 89E-53  | 1. 51E-52  | 109. 1879 |
| PLA2G7       | 2. 475676 | 1. 393382 | 30. 0211  | 9. 91E-95  | 3. 18E-93  | 204. 36   |
| ADGRF5       | 1. 170447 | 2. 205228 | 17. 15198 | 4. 01E-47  | 2. 80E-46  | 94. 61728 |
| ADGRF1       | 3. 421895 | 1. 821761 | 34. 19528 | 1. 91E-108 | 1. 31E-106 | 236. 0039 |
| TNFRSF21     | 3. 733608 | 4. 233898 | 40. 30027 | 7. 50E-127 | 1. 61E-124 | 278. 4826 |
| CD2AP        | 1. 812603 | 3. 542833 | 25. 23711 | 7. 41E-78  | 1. 19E-76  | 165. 4394 |
| ADGRF4       | 1. 712182 | 0. 847006 | 26. 60618 | 8. 29E-83  | 1. 57E-81  | 176. 8583 |
| CRISP3       | 2. 946626 | 2. 271575 | 14. 06671 | 2. 90E-35  | 1. 59E-34  | 67. 3386  |
| MCM3         | 2. 146047 | 3. 888597 | 34. 58672 | 1. 11E-109 | 8. 17E-108 | 238. 8605 |
| PAQR8        | 2. 655188 | 1. 87802  | 33. 38113 | 7. 63E-106 | 4. 48E-104 | 230. 0022 |
| TRAM2        | 1. 634376 | 2. 534238 | 23. 65714 | 4. 98E-72  | 6. 53E-71  | 152. 0029 |
| TMEM14A      | 1. 149486 | 4. 343778 | 16. 71898 | 1. 91E-45  | 1. 29E-44  | 90. 75356 |
| GSTA7P       | -1. 03646 | 0. 634785 | -21. 4045 | 1. 55E-63  | 1. 60E-62  | 132. 4244 |
| GSTA2        | -4. 2846  | 3. 855897 | -27. 9778 | 1. 13E-87  | 2. 57E-86  | 188. 0766 |
| GSTA1        | -1. 17413 | 4. 729543 | -7. 31028 | 2. 18E-12  | 7. 19E-12  | 14. 97782 |
| ELOVL5       | 2. 434954 | 3. 695518 | 29. 47682 | 7. 15E-93  | 2. 08E-91  | 200. 0732 |
| LRRC1        | 1. 577484 | 3. 005114 | 26. 38522 | 5. 14E-82  | 9. 46E-81  | 175. 03   |
| TINAG        | 1. 321452 | 0. 638024 | 16. 58688 | 6. 22E-45  | 4. 15E-44  | 89. 57597 |
| FAM83B       | 1. 292562 | 1. 001146 | 22. 5056  | 1. 03E-67  | 1. 20E-66  | 142. 0507 |
| RP3-523K23.2 | 1. 890407 | 1. 516867 | 32. 0496  | 1. 63E-101 | 7. 39E-100 | 220. 0095 |
| DST          | 1. 463434 | 5. 229803 | 18. 99041 | 2. 98E-54  | 2. 43E-53  | 111. 0347 |
| BEND6        | 1. 104507 | 0. 675419 | 21. 43831 | 1. 15E-63  | 1. 19E-62  | 132. 7214 |
| BAG2         | 1. 110329 | 1. 131779 | 18. 54916 | 1. 52E-52  | 1. 20E-51  | 107. 0977 |
| RAB23        | 2. 158383 | 1. 79807  | 27. 58261 | 2. 79E-86  | 5. 99E-85  | 184. 8676 |
| PRIM2        | 1. 449406 | 1. 891665 | 33. 3225  | 1. 18E-105 | 6. 83E-104 | 229. 5668 |
| PTP4A1       | 1. 403318 | 5. 42962  | 11. 91313 | 2. 69E-27  | 1. 26E-26  | 49. 04134 |
| LMBRD1       | 1. 059403 | 4. 609608 | 16. 43647 | 2. 38E-44  | 1. 57E-43  | 88. 23593 |
| RP11-462G2.1 | -1. 13957 | 4. 146694 | -4. 81373 | 2. 30E-06  | 6. 05E-06  | 1. 423405 |
| FAM135A      | 1. 380659 | 2. 657762 | 18. 26368 | 1. 95E-51  | 1. 49E-50  | 104. 5484 |
| SDHAF4       | 1. 150196 | 2. 39507  | 24. 26162 | 2. 84E-74  | 4. 04E-73  | 157. 1748 |
| RPL39P3      | 1. 702109 | 7. 911305 | 12. 35038 | 7. 01E-29  | 3. 38E-28  | 52. 6764  |
| MB21D1       | 1. 694994 | 1. 350039 | 35. 79162 | 1. 92E-113 | 1. 78E-111 | 247. 5363 |
| SLC17A5      | 1. 60963  | 2. 832643 | 26. 16302 | 3. 24E-81  | 5. 78E-80  | 173. 1858 |
| CD109        | 2. 317969 | 1. 348597 | 29. 30276 | 2. 83E-92  | 8. 02E-91  | 198. 6945 |
| COL12A1      | 4. 360787 | 3. 708202 | 35. 78897 | 1. 96E-113 | 1. 82E-111 | 247. 5174 |
| COX7A2       | 2. 16256  | 6. 989269 | 29. 7014  | 1. 22E-93  | 3. 69E-92  | 201. 8465 |
| MYO6         | 1. 467513 | 3. 875471 | 20. 13803 | 1. 10E-58  | 1. 00E-57  | 121. 2422 |
| RP11-354K4.2 | -1. 14121 | 0. 656438 | -24. 6248 | 1. 30E-75  | 1. 93E-74  | 160. 2642 |
| SH3BGR2      | 1. 812219 | 3. 190572 | 25. 18403 | 1. 16E-77  | 1. 84E-76  | 164. 9924 |
| TTK          | 1. 427795 | 0. 847843 | 28. 88993 | 7. 52E-91  | 2. 00E-89  | 195. 4094 |
| FAM46A       | 1. 627787 | 2. 162563 | 25. 09053 | 2. 54E-77  | 3. 99E-76  | 164. 2043 |
| TPBG         | 2. 14648  | 3. 024319 | 30. 95415 | 7. 05E-98  | 2. 64E-96  | 211. 6223 |
| ME1          | 1. 1118   | 1. 626602 | 16. 52707 | 1. 06E-44  | 7. 03E-44  | 89. 04298 |
| CYB5R4       | 1. 576209 | 2. 273368 | 25. 59696 | 3. 63E-79  | 6. 06E-78  | 168. 4616 |

|               |           |           |           |            |            |           |
|---------------|-----------|-----------|-----------|------------|------------|-----------|
| MRAP2         | 1. 289048 | 1. 716302 | 14. 63783 | 1. 96E-37  | 1. 13E-36  | 72. 32421 |
| NT5E          | 3. 547952 | 2. 396828 | 39. 45041 | 2. 11E-124 | 3. 89E-122 | 272. 8273 |
| SNX14         | 1. 127463 | 4. 967735 | 18. 22691 | 2. 71E-51  | 2. 07E-50  | 104. 2199 |
| SYNCRIP       | 1. 391571 | 4. 318388 | 21. 69223 | 1. 24E-64  | 1. 32E-63  | 134. 9493 |
| SLC35A1       | 1. 614813 | 3. 517441 | 25. 55803 | 5. 02E-79  | 8. 34E-78  | 168. 1354 |
| AKIRIN2       | 1. 627523 | 3. 537811 | 29. 06324 | 1. 89E-91  | 5. 18E-90  | 196. 7911 |
| RNGTT         | 1. 22569  | 1. 58605  | 26. 6763  | 4. 65E-83  | 8. 87E-82  | 177. 4372 |
| PNRC1         | 1. 189204 | 5. 467562 | 13. 7155  | 6. 12E-34  | 3. 27E-33  | 64. 29528 |
| LYRM2         | 1. 15563  | 3. 008027 | 19. 53971 | 2. 24E-56  | 1. 93E-55  | 115. 9274 |
| MAP3K7        | 1. 073749 | 2. 941984 | 20. 45382 | 6. 74E-60  | 6. 31E-59  | 124. 0399 |
| NDUFAF4       | 1. 151411 | 3. 669247 | 19. 52015 | 2. 66E-56  | 2. 29E-55  | 115. 7534 |
| ASCC3         | 1. 129582 | 2. 843868 | 20. 01726 | 3. 22E-58  | 2. 90E-57  | 120. 1709 |
| PREP          | 1. 44809  | 3. 676264 | 24. 55474 | 2. 36E-75  | 3. 47E-74  | 159. 6691 |
| PRDM1         | 2. 28009  | 1. 652457 | 33. 48883 | 3. 44E-106 | 2. 06E-104 | 230. 8008 |
| ATG5          | 1. 372641 | 3. 121872 | 27. 72435 | 8. 83E-87  | 1. 93E-85  | 186. 0207 |
| AIM1          | 1. 773023 | 2. 108624 | 26. 261   | 1. 44E-81  | 2. 59E-80  | 173. 9998 |
| RTN4IP1       | 1. 189328 | 1. 717014 | 29. 70251 | 1. 21E-93  | 3. 66E-92  | 201. 8552 |
| RP1-60019. 1  | -1. 5293  | 4. 22317  | -9. 60399 | 2. 44E-19  | 9. 59E-19  | 30. 81716 |
| C6orf203      | 1. 092574 | 3. 30485  | 21. 02622 | 4. 31E-62  | 4. 28E-61  | 129. 0955 |
| OSTM1         | 1. 26868  | 2. 994136 | 19. 86539 | 1. 24E-57  | 1. 10E-56  | 118. 8226 |
| SNX3          | 1. 296779 | 6. 164275 | 18. 2103  | 3. 14E-51  | 2. 39E-50  | 104. 0715 |
| CD164         | 1. 793268 | 6. 308181 | 22. 64721 | 3. 02E-68  | 3. 56E-67  | 143. 2812 |
| MICAL1        | 1. 522189 | 3. 593776 | 17. 82221 | 1. 01E-49  | 7. 43E-49  | 100. 6043 |
| FIG4          | 1. 122042 | 2. 456913 | 24. 0172  | 2. 29E-73  | 3. 14E-72  | 155. 0881 |
| CDK19         | 1. 338264 | 1. 962632 | 27. 32992 | 2. 19E-85  | 4. 53E-84  | 182. 8059 |
| GTF3C6        | 1. 748094 | 4. 817121 | 26. 98645 | 3. 63E-84  | 7. 21E-83  | 179. 9911 |
| SLC16A10      | -1. 04067 | 2. 239641 | -14. 2271 | 7. 16E-36  | 3. 96E-35  | 68. 7347  |
| TRAF3IP2      | 1. 221051 | 3. 914061 | 20. 64378 | 1. 26E-60  | 1. 20E-59  | 125. 7201 |
| FYN           | 2. 267274 | 3. 805456 | 27. 81219 | 4. 33E-87  | 9. 59E-86  | 186. 734  |
| WISP3         | 1. 203333 | 0. 68459  | 10. 50938 | 2. 30E-22  | 9. 62E-22  | 37. 74112 |
| FAM229B       | 1. 836554 | 2. 852056 | 27. 71636 | 9. 42E-87  | 2. 06E-85  | 185. 9558 |
| LAMA4         | 3. 373909 | 2. 968383 | 39. 6229  | 6. 68E-125 | 1. 26E-122 | 273. 9816 |
| MARCKS        | 1. 751719 | 4. 774117 | 25. 98416 | 1. 43E-80  | 2. 50E-79  | 171. 6971 |
| HDAC2         | 1. 392996 | 4. 825788 | 21. 84281 | 3. 33E-65  | 3. 61E-64  | 136. 2681 |
| NT5DC1        | 1. 05939  | 3. 353623 | 15. 90312 | 2. 74E-42  | 1. 73E-41  | 83. 49308 |
| COL10A1       | 6. 212415 | 3. 1732   | 46. 64471 | 4. 29E-144 | 3. 76E-141 | 318. 2813 |
| DSE           | 2. 014421 | 2. 180597 | 24. 10715 | 1. 06E-73  | 1. 48E-72  | 155. 8568 |
| FAM26F        | 2. 569269 | 1. 91699  | 29. 13089 | 1. 11E-91  | 3. 06E-90  | 197. 3294 |
| DCBLD1        | 1. 687651 | 2. 885849 | 25. 76075 | 9. 22E-80  | 1. 57E-78  | 169. 8324 |
| PLN           | 1. 577442 | 1. 433699 | 15. 66224 | 2. 32E-41  | 1. 44E-40  | 81. 35652 |
| GJA1          | 3. 026503 | 3. 598993 | 29. 48006 | 6. 97E-93  | 2. 03E-91  | 200. 0988 |
| RP3-425C14. 4 | 1. 07508  | 1. 509239 | 22. 15825 | 2. 12E-66  | 2. 37E-65  | 139. 0248 |
| SERINC1       | 1. 675603 | 5. 319182 | 21. 01848 | 4. 62E-62  | 4. 58E-61  | 129. 0273 |
| PKIB          | 1. 712837 | 2. 444948 | 22. 20621 | 1. 40E-66  | 1. 57E-65  | 139. 4432 |
| HDDC2         | 1. 251983 | 5. 035432 | 20. 46131 | 6. 31E-60  | 5. 91E-59  | 124. 1062 |
| NCOA7         | 2. 366599 | 3. 612315 | 28. 27277 | 1. 05E-88  | 2. 50E-87  | 190. 459  |
| HINT3         | 1. 08435  | 3. 023093 | 21. 74736 | 7. 68E-65  | 8. 22E-64  | 135. 4323 |
| RNA5SP216     | -1. 67912 | 1. 414143 | -8. 63492 | 2. 90E-16  | 1. 06E-15  | 23. 79588 |
| CENPW         | 2. 966218 | 2. 270423 | 44. 31227 | 5. 81E-138 | 3. 08E-135 | 304. 1277 |
| ECHDC1        | 1. 403705 | 4. 068041 | 25. 07657 | 2. 86E-77  | 4. 48E-76  | 164. 0865 |
| YWHAZP4       | 1. 456395 | 0. 805978 | 29. 0728  | 1. 75E-91  | 4. 81E-90  | 196. 8672 |
| PTPRK         | 1. 459031 | 3. 954407 | 21. 53497 | 4. 94E-64  | 5. 17E-63  | 133. 57   |
| L3MBTL3       | 1. 414428 | 1. 641419 | 27. 77452 | 5. 88E-87  | 1. 29E-85  | 186. 4282 |
| TMEM200A      | 2. 543397 | 1. 700043 | 30. 21166 | 2. 24E-95  | 7. 37E-94  | 205. 852  |

|              |           |           |           |            |            |           |
|--------------|-----------|-----------|-----------|------------|------------|-----------|
| EPB41L2      | 1. 572103 | 3. 768928 | 18. 96653 | 3. 68E-54  | 3. 00E-53  | 110. 8218 |
| CTGF         | 2. 754384 | 5. 983513 | 19. 88151 | 1. 07E-57  | 9. 53E-57  | 118. 9658 |
| MOXD1        | 3. 184245 | 2. 378547 | 32. 00254 | 2. 33E-101 | 1. 05E-99  | 219. 6522 |
| STX7         | 2. 065936 | 3. 359194 | 27. 45904 | 7. 63E-86  | 1. 61E-84  | 183. 8603 |
| VNN1         | 3. 003085 | 1. 99382  | 22. 96187 | 1. 98E-69  | 2. 41E-68  | 146. 0089 |
| VNN2         | 2. 229549 | 1. 789212 | 23. 17586 | 3. 12E-70  | 3. 91E-69  | 147. 8588 |
| SLC18B1      | 1. 122969 | 2. 704524 | 21. 04258 | 3. 74E-62  | 3. 72E-61  | 129. 2397 |
| TCF21        | 1. 043358 | 1. 206317 | 17. 32372 | 8. 66E-48  | 6. 13E-47  | 96. 15095 |
| TBPL1        | 1. 337597 | 3. 516372 | 22. 56724 | 6. 05E-68  | 7. 05E-67  | 142. 5865 |
| MYB          | 1. 172996 | 0. 649022 | 23. 97054 | 3. 40E-73  | 4. 65E-72  | 154. 6891 |
| MTFR2        | 1. 103688 | 0. 784049 | 28. 17228 | 2. 36E-88  | 5. 53E-87  | 189. 6485 |
| IL20RA       | 1. 172473 | 2. 635414 | 16. 64887 | 3. 58E-45  | 2. 40E-44  | 90. 12848 |
| IFNGR1       | 1. 928671 | 4. 836573 | 23. 94454 | 4. 25E-73  | 5. 79E-72  | 154. 4666 |
| TNFAIP3      | 1. 382914 | 3. 389904 | 14. 28291 | 4. 40E-36  | 2. 44E-35  | 69. 22091 |
| PERP         | 2. 942291 | 4. 934442 | 35. 88157 | 1. 01E-113 | 9. 62E-112 | 248. 177  |
| HEBP2        | 1. 559541 | 4. 643978 | 22. 45503 | 1. 60E-67  | 1. 85E-66  | 141. 6108 |
| ABRACL       | 2. 749789 | 4. 035254 | 38. 37789 | 2. 94E-121 | 4. 54E-119 | 265. 5743 |
| HECA         | 1. 602581 | 2. 584863 | 28. 8394  | 1. 12E-90  | 2. 96E-89  | 195. 0058 |
| VTA1         | 1. 58379  | 3. 4762   | 27. 18364 | 7. 23E-85  | 1. 46E-83  | 181. 6088 |
| ADGRG6       | 2. 327257 | 2. 007621 | 27. 99547 | 9. 84E-88  | 2. 24E-86  | 188. 2194 |
| HIVEP2       | 1. 077676 | 2. 293942 | 17. 47731 | 2. 19E-48  | 1. 57E-47  | 97. 52286 |
| AIG1         | 2. 04174  | 3. 896195 | 32. 47233 | 6. 73E-103 | 3. 31E-101 | 223. 2058 |
| PEX3         | 1. 049731 | 2. 599441 | 21. 33184 | 2. 93E-63  | 3. 01E-62  | 131. 7858 |
| FUCA2        | 1. 465748 | 4. 393417 | 25. 82751 | 5. 28E-80  | 9. 05E-79  | 170. 3902 |
| PHACTR2      | 1. 641851 | 1. 892712 | 26. 52564 | 1. 61E-82  | 3. 01E-81  | 176. 1926 |
| SF3B5        | 1. 272995 | 6. 315684 | 18. 57254 | 1. 24E-52  | 9. 73E-52  | 107. 3064 |
| STX11        | 1. 243745 | 1. 118359 | 21. 74277 | 7. 99E-65  | 8. 55E-64  | 135. 3922 |
| RAB32        | 2. 564552 | 3. 587379 | 34. 31931 | 7. 73E-109 | 5. 45E-107 | 236. 911  |
| SAMD5        | 1. 163686 | 0. 856278 | 18. 91332 | 5. 92E-54  | 4. 80E-53  | 110. 3472 |
| TAB2         | 1. 335648 | 3. 707059 | 22. 06263 | 4. 89E-66  | 5. 40E-65  | 138. 1901 |
| PPIL4        | 1. 159608 | 3. 154773 | 20. 01044 | 3. 42E-58  | 3. 07E-57  | 120. 1104 |
| GINM1        | 1. 27166  | 4. 131422 | 20. 94105 | 9. 14E-62  | 8. 99E-61  | 128. 3446 |
| KATNA1       | 1. 208294 | 2. 638897 | 26. 96638 | 4. 28E-84  | 8. 47E-83  | 179. 8262 |
| PCMT1        | 1. 223357 | 4. 480488 | 21. 59435 | 2. 93E-64  | 3. 09E-63  | 134. 091  |
| LRP11        | 1. 475463 | 3. 443418 | 24. 10828 | 1. 05E-73  | 1. 46E-72  | 155. 8664 |
| P11-350J20.1 | 4. 129404 | 2. 018776 | 41. 72026 | 7. 21E-131 | 2. 17E-128 | 287. 7545 |
| ULBP2        | 1. 656797 | 1. 023326 | 23. 45945 | 2. 72E-71  | 3. 49E-70  | 150. 3034 |
| RAET1L       | 1. 559028 | 0. 826134 | 18. 40798 | 5. 38E-52  | 4. 17E-51  | 105. 8371 |
| PPP1R14C     | 2. 378718 | 1. 468311 | 27. 98223 | 1. 09E-87  | 2. 48E-86  | 188. 1122 |
| IYD          | 1. 860244 | 0. 988378 | 22. 31656 | 5. 34E-67  | 6. 07E-66  | 140. 4052 |
| PLEKHG1      | 2. 090667 | 1. 599522 | 36. 25117 | 7. 41E-115 | 7. 63E-113 | 250. 7992 |
| MTHFD1L      | 1. 928692 | 2. 990661 | 29. 2104  | 5. 88E-92  | 1. 65E-90  | 197. 9613 |
| AKAP12       | 2. 390883 | 2. 671218 | 21. 98385 | 9. 72E-66  | 1. 06E-64  | 137. 5017 |
| ZBTB2        | 1. 279772 | 2. 165012 | 29. 37654 | 1. 58E-92  | 4. 52E-91  | 199. 2793 |
| RMND1        | 1. 085018 | 2. 76602  | 21. 67128 | 1. 49E-64  | 1. 59E-63  | 134. 7657 |
| ARMT1        | 1. 638195 | 2. 460983 | 31. 03834 | 3. 69E-98  | 1. 40E-96  | 212. 2722 |
| MYCT1        | 1. 134038 | 1. 457709 | 12. 72224 | 3. 04E-30  | 1. 51E-29  | 55. 80376 |
| FBX05        | 1. 043461 | 1. 391453 | 23. 84567 | 9. 90E-73  | 1. 33E-71  | 153. 62   |
| P11-475C16.  | 1. 0212   | 4. 325603 | 12. 17989 | 2. 93E-28  | 1. 39E-27  | 51. 25331 |
| TIAM2        | 1. 103684 | 2. 030027 | 13. 98077 | 6. 12E-35  | 3. 33E-34  | 66. 59216 |
| ZDHHC14      | 1. 441202 | 2. 420439 | 24. 16683 | 6. 38E-74  | 8. 96E-73  | 156. 3664 |
| SNX9         | 1. 854852 | 4. 03977  | 28. 86708 | 9. 02E-91  | 2. 38E-89  | 195. 227  |
| SYNJ2        | 1. 346329 | 2. 410589 | 25. 05016 | 3. 57E-77  | 5. 57E-76  | 163. 8637 |
| GTF2H5       | 1. 118176 | 1. 556316 | 35. 0366  | 4. 27E-111 | 3. 46E-109 | 242. 1205 |



|               |           |           |           |            |            |           |
|---------------|-----------|-----------|-----------|------------|------------|-----------|
| DYNLT1        | 2. 604803 | 5. 699796 | 36. 04312 | 3. 23E-114 | 3. 22E-112 | 249. 3252 |
| SYTL3         | 1. 631933 | 1. 35864  | 24. 71676 | 5. 97E-76  | 8. 96E-75  | 161. 0438 |
| EZR           | 3. 037555 | 6. 316541 | 34. 68672 | 5. 35E-110 | 4. 02E-108 | 239. 5872 |
| RSPH3         | 1. 053456 | 1. 636176 | 23. 15518 | 3. 73E-70  | 4. 66E-69  | 147. 6802 |
| TAGAP         | 1. 629071 | 1. 066198 | 22. 63595 | 3. 33E-68  | 3. 92E-67  | 143. 1834 |
| RP11-13P5. 2  | 1. 334934 | 0. 655953 | 23. 98489 | 3. 01E-73  | 4. 13E-72  | 154. 8118 |
| FNDC1         | 3. 430124 | 2. 059689 | 32. 54991 | 3. 76E-103 | 1. 88E-101 | 223. 79   |
| ACAT2         | 1. 737397 | 2. 839522 | 23. 72047 | 2. 89E-72  | 3. 84E-71  | 152. 5465 |
| MRPL18        | 1. 660435 | 4. 78895  | 27. 62431 | 1. 99E-86  | 4. 30E-85  | 185. 207  |
| IGF2R         | 1. 459061 | 3. 681087 | 22. 01197 | 7. 60E-66  | 8. 36E-65  | 137. 7475 |
| SLC22A3       | 2. 526496 | 1. 574403 | 29. 51215 | 5. 41E-93  | 1. 58E-91  | 200. 3526 |
| RP3-428L16. 2 | 1. 361775 | 0. 869195 | 20. 89416 | 1. 38E-61  | 1. 35E-60  | 127. 931  |
| AGPAT4        | 1. 178033 | 1. 478625 | 22. 17599 | 1. 82E-66  | 2. 04E-65  | 139. 1796 |
| QKI           | 1. 485718 | 3. 25406  | 18. 10042 | 8. 39E-51  | 6. 32E-50  | 103. 09   |
| SFT2D1        | 1. 076429 | 5. 00717  | 18. 27224 | 1. 81E-51  | 1. 38E-50  | 104. 6248 |
| FAM103A2P     | 1. 896111 | 2. 078773 | 19. 05671 | 1. 65E-54  | 1. 36E-53  | 111. 6258 |
| RNASSET2      | 2. 785434 | 5. 910637 | 33. 62344 | 1. 27E-106 | 7. 76E-105 | 231. 797  |
| CCR6          | 1. 412309 | 0. 689429 | 21. 83416 | 3. 59E-65  | 3. 89E-64  | 136. 1924 |
| SMOC2         | 1. 925929 | 3. 872792 | 18. 58862 | 1. 07E-52  | 8. 44E-52  | 107. 4499 |
| RP11-417E7. 1 | 1. 326329 | 0. 666771 | 19. 32483 | 1. 51E-55  | 1. 28E-54  | 114. 0148 |
| RP11-417E7. 2 | 1. 376286 | 0. 664579 | 18. 56585 | 1. 31E-52  | 1. 03E-51  | 107. 2467 |
| THBS2         | 5. 140359 | 3. 93704  | 42. 01758 | 1. 07E-131 | 3. 63E-129 | 289. 6683 |
| FLJ38122      | -2. 92264 | 1. 933375 | -36. 4572 | 1. 74E-115 | 1. 86E-113 | 252. 2537 |
| PSMB1         | 1. 583483 | 6. 593559 | 22. 27447 | 7. 71E-67  | 8. 71E-66  | 140. 0384 |
| FAM20C        | 2. 08283  | 4. 099047 | 26. 10544 | 5. 23E-81  | 9. 26E-80  | 172. 707  |
| PRKAR1B       | 1. 908354 | 2. 676895 | 31. 38118 | 2. 65E-99  | 1. 06E-97  | 214. 9096 |
| AC147651. 4   | 1. 17607  | 0. 802607 | 23. 09308 | 6. 38E-70  | 7. 89E-69  | 147. 1437 |
| DNAAF5        | 1. 164358 | 3. 095498 | 21. 43341 | 1. 20E-63  | 1. 25E-62  | 132. 6783 |
| SUN1          | 1. 011322 | 5. 252481 | 13. 50905 | 3. 64E-33  | 1. 92E-32  | 62. 51551 |
| ADAP1         | 2. 646253 | 4. 151716 | 21. 78189 | 5. 68E-65  | 6. 10E-64  | 135. 7348 |
| CYP2W1        | 1. 169297 | 0. 877889 | 12. 82913 | 1. 23E-30  | 6. 14E-30  | 56. 70828 |
| ZFAND2A       | 1. 085776 | 4. 466524 | 9. 717089 | 1. 04E-19  | 4. 13E-19  | 31. 66405 |
| MICALL2       | 2. 001337 | 4. 477673 | 18. 81554 | 1. 42E-53  | 1. 14E-52  | 109. 475  |
| PSMG3         | 2. 206632 | 4. 477477 | 32. 93977 | 2. 03E-104 | 1. 09E-102 | 226. 7144 |
| ELFN1-AS1     | 1. 022338 | 0. 496657 | 12. 64585 | 5. 81E-30  | 2. 86E-29  | 55. 15878 |
| MAD1L1        | 2. 503841 | 3. 35077  | 33. 87009 | 2. 07E-107 | 1. 33E-105 | 233. 6165 |
| FTSJ2         | 1. 790028 | 3. 290497 | 37. 42256 | 2. 07E-118 | 2. 63E-116 | 259. 0028 |
| NUDT1         | 2. 769401 | 3. 474224 | 45. 93357 | 3. 00E-142 | 2. 39E-139 | 314. 0223 |
| SNX8          | 2. 160542 | 3. 83908  | 31. 13242 | 1. 79E-98  | 6. 89E-97  | 212. 9974 |
| IQCE          | 1. 41638  | 2. 753942 | 25. 44201 | 1. 33E-78  | 2. 17E-77  | 167. 1621 |
| TTYH3         | 3. 294422 | 3. 793307 | 40. 43293 | 3. 13E-127 | 7. 01E-125 | 279. 3581 |
| GNA12         | 1. 530518 | 3. 752411 | 22. 48904 | 1. 19E-67  | 1. 38E-66  | 141. 9066 |
| CARD11        | 3. 812168 | 2. 466595 | 48. 73552 | 2. 12E-149 | 2. 73E-146 | 330. 5275 |
| SDK1          | -1. 13237 | 2. 445893 | -10. 4793 | 2. 91E-22  | 1. 22E-21  | 37. 50596 |
| AP5Z1         | 1. 062534 | 3. 854009 | 14. 99317 | 8. 62E-39  | 5. 08E-38  | 75. 4459  |
| RNF216P1      | 1. 022544 | 2. 805507 | 22. 14882 | 2. 30E-66  | 2. 57E-65  | 138. 9426 |
| WIPI2         | 1. 060423 | 4. 633547 | 18. 58916 | 1. 07E-52  | 8. 40E-52  | 107. 4547 |
| TNRC18        | 1. 254915 | 4. 312858 | 16. 88344 | 4. 41E-46  | 3. 02E-45  | 92. 22053 |
| ACTB          | 3. 737332 | 10. 01743 | 35. 51431 | 1. 39E-112 | 1. 22E-110 | 245. 5551 |
| FSCN1         | 4. 049382 | 3. 681663 | 41. 73247 | 6. 66E-131 | 2. 02E-128 | 287. 8333 |
| CCZ1          | 1. 827155 | 4. 776526 | 30. 41267 | 4. 67E-96  | 1. 60E-94  | 207. 421  |
| PMS2          | 1. 182048 | 1. 748813 | 26. 31731 | 9. 02E-82  | 1. 64E-80  | 174. 467  |
| AIMP2         | 1. 805758 | 3. 493638 | 30. 45997 | 3. 23E-96  | 1. 11E-94  | 207. 7894 |
| EIF2AK1       | 1. 670293 | 4. 765429 | 28. 27425 | 1. 04E-88  | 2. 47E-87  | 190. 471  |

|               |           |           |           |            |            |           |
|---------------|-----------|-----------|-----------|------------|------------|-----------|
| CYTH3         | 1. 763543 | 2. 862086 | 24. 61421 | 1. 42E-75  | 2. 11E-74  | 160. 174  |
| FAM220A       | 1. 438722 | 2. 741099 | 29. 69596 | 1. 27E-93  | 3. 84E-92  | 201. 8036 |
| RAC1          | 2. 784025 | 6. 722472 | 36. 40511 | 2. 51E-115 | 2. 65E-113 | 251. 8865 |
| DAGLB         | 1. 33882  | 3. 005207 | 23. 98711 | 2. 96E-73  | 4. 05E-72  | 154. 8308 |
| KDELR2        | 1. 89254  | 6. 072156 | 27. 30748 | 2. 63E-85  | 5. 42E-84  | 182. 6224 |
| ZDHHC4        | 1. 04771  | 4. 999189 | 18. 40011 | 5. 77E-52  | 4. 47E-51  | 105. 7669 |
| CCZ1B         | 1. 336861 | 4. 617381 | 18. 88882 | 7. 37E-54  | 5. 96E-53  | 110. 1287 |
| C1GALT1       | 2. 525822 | 2. 824185 | 33. 18922 | 3. 17E-105 | 1. 79E-103 | 228. 5756 |
| COL28A1       | -1. 15055 | 1. 619345 | -13. 3839 | 1. 07E-32  | 5. 58E-32  | 61. 43987 |
| RP5-115904. 2 | -1. 10368 | 1. 117062 | -20. 6446 | 1. 25E-60  | 1. 20E-59  | 125. 727  |
| RP5-115904. 1 | -1. 68089 | 2. 935584 | -18. 1506 | 5. 35E-51  | 4. 05E-50  | 103. 5386 |
| RPA3          | 2. 179522 | 3. 76798  | 35. 61259 | 6. 88E-113 | 6. 18E-111 | 246. 2584 |
| NDUFA4        | 1. 696499 | 5. 675238 | 27. 24057 | 4. 54E-85  | 9. 27E-84  | 182. 075  |
| PHF14         | 1. 654213 | 3. 324996 | 30. 85673 | 1. 50E-97  | 5. 50E-96  | 210. 8691 |
| TMEM106B      | 1. 773272 | 3. 275567 | 27. 82512 | 3. 90E-87  | 8. 65E-86  | 186. 839  |
| SCIN          | 2. 546783 | 1. 667085 | 26. 47296 | 2. 49E-82  | 4. 62E-81  | 175. 7568 |
| ARL4A         | 2. 668286 | 3. 110921 | 40. 54952 | 1. 45E-127 | 3. 33E-125 | 280. 126  |
| ETV1          | 2. 461614 | 1. 877627 | 32. 85388 | 3. 85E-104 | 2. 04E-102 | 226. 0717 |
| AGMO          | 1. 605025 | 0. 80614  | 18. 89505 | 6. 97E-54  | 5. 64E-53  | 110. 1843 |
| SOSTDC1       | 1. 064116 | 0. 601442 | 11. 60091 | 3. 54E-26  | 1. 61E-25  | 46. 47645 |
| ANKMY2        | 1. 19348  | 2. 881082 | 22. 74196 | 1. 33E-68  | 1. 58E-67  | 144. 1036 |
| BZW2          | 1. 537423 | 4. 547995 | 23. 07596 | 7. 40E-70  | 9. 14E-69  | 146. 9957 |
| AGR2          | 6. 130171 | 5. 44776  | 42. 73346 | 1. 12E-133 | 4. 39E-131 | 294. 238  |
| AGR3          | 4. 400966 | 3. 567324 | 33. 29188 | 1. 48E-105 | 8. 54E-104 | 229. 3393 |
| AHR           | 3. 324403 | 3. 280803 | 39. 18681 | 1. 24E-123 | 2. 14E-121 | 271. 0568 |
| AC019117. 2   | 1. 270078 | 1. 303688 | 14. 28166 | 4. 45E-36  | 2. 47E-35  | 69. 21007 |
| HDAC9         | 1. 806986 | 1. 399976 | 25. 91736 | 2. 50E-80  | 4. 32E-79  | 171. 1401 |
| TWIST1        | 2. 460211 | 1. 497504 | 27. 39647 | 1. 27E-85  | 2. 66E-84  | 183. 3496 |
| TWISTNB       | 1. 281104 | 2. 156883 | 27. 27094 | 3. 54E-85  | 7. 26E-84  | 182. 3235 |
| MACC1         | 1. 803042 | 2. 033286 | 24. 35695 | 1. 26E-74  | 1. 81E-73  | 157. 9871 |
| ITGB8         | 1. 562493 | 2. 390572 | 18. 0938  | 8. 90E-51  | 6. 70E-50  | 103. 0308 |
| EEF1A1P6      | 1. 589852 | 3. 679351 | 22. 61105 | 4. 14E-68  | 4. 85E-67  | 142. 9671 |
| IL6           | 1. 443916 | 1. 455364 | 10. 76294 | 3. 09E-23  | 1. 32E-22  | 39. 73544 |
| TOMM7         | 1. 044701 | 8. 364117 | 12. 40858 | 4. 30E-29  | 2. 08E-28  | 53. 1637  |
| KLHL7         | 1. 505654 | 2. 915459 | 28. 61615 | 6. 69E-90  | 1. 70E-88  | 193. 2192 |
| NUPL2         | 1. 138278 | 3. 794753 | 19. 57831 | 1. 59E-56  | 1. 37E-55  | 116. 2708 |
| GPNMB         | 3. 793872 | 4. 440238 | 32. 17805 | 6. 18E-102 | 2. 87E-100 | 220. 983  |
| MALSU1        | 1. 291683 | 4. 451507 | 22. 10715 | 3. 31E-66  | 3. 68E-65  | 138. 5788 |
| IGF2BP3       | 1. 538177 | 1. 223728 | 14. 85772 | 2. 84E-38  | 1. 66E-37  | 74. 25436 |
| DFNA5         | 2. 096589 | 2. 117918 | 28. 49588 | 1. 75E-89  | 4. 34E-88  | 192. 254  |
| OSBPL3        | 2. 550323 | 2. 533809 | 37. 66274 | 3. 94E-119 | 5. 26E-117 | 260. 6649 |
| CYCS          | 2. 31072  | 4. 687815 | 32. 61443 | 2. 31E-103 | 1. 17E-101 | 224. 2753 |
| TD-2227E11.   | -2. 64684 | 2. 693883 | -27. 1111 | 1. 31E-84  | 2. 63E-83  | 181. 0142 |
| NFE2L3        | 1. 740891 | 3. 475935 | 23. 61224 | 7. 32E-72  | 9. 56E-71  | 151. 6173 |
| HNRNPA2B1     | 1. 226654 | 8. 044922 | 14. 59951 | 2. 75E-37  | 1. 57E-36  | 71. 98847 |
| CBX3          | 1. 905147 | 5. 663824 | 27. 8563  | 3. 03E-87  | 6. 76E-86  | 187. 0919 |
| SNX10         | 1. 444944 | 2. 500872 | 15. 27074 | 7. 44E-40  | 4. 48E-39  | 77. 89325 |
| SKAP2         | 2. 969515 | 2. 853991 | 44. 15058 | 1. 58E-137 | 8. 08E-135 | 303. 1266 |
| HOTAIRM1      | 1. 666062 | 2. 234045 | 18. 51227 | 2. 12E-52  | 1. 66E-51  | 106. 7683 |
| HOXA3         | 2. 024453 | 1. 365164 | 29. 98794 | 1. 28E-94  | 4. 10E-93  | 204. 0998 |
| HOXA-AS2      | 2. 237049 | 1. 977538 | 27. 80701 | 4. 52E-87  | 9. 99E-86  | 186. 6919 |
| HOXA4         | 1. 323511 | 1. 426511 | 21. 3832  | 1. 87E-63  | 1. 93E-62  | 132. 2372 |
| HOXA5         | 1. 442089 | 1. 368701 | 22. 05712 | 5. 13E-66  | 5. 66E-65  | 138. 1419 |
| HOXA10        | 2. 080921 | 1. 05058  | 20. 46099 | 6. 33E-60  | 5. 93E-59  | 124. 1034 |

|              |           |           |           |            |            |           |
|--------------|-----------|-----------|-----------|------------|------------|-----------|
| HOXA13       | 1. 111662 | 0. 536761 | 14. 21621 | 7. 87E-36  | 4. 35E-35  | 68. 63954 |
| HIBADH       | 1. 409386 | 3. 992142 | 25. 08893 | 2. 58E-77  | 4. 04E-76  | 164. 1908 |
| TAX1BP1      | 1. 930647 | 5. 129986 | 29. 71813 | 1. 07E-93  | 3. 24E-92  | 201. 9783 |
| JAZF1        | 1. 570355 | 2. 417806 | 24. 91587 | 1. 11E-76  | 1. 71E-75  | 162. 7293 |
| TRIL         | 1. 166613 | 0. 834612 | 22. 7467  | 1. 28E-68  | 1. 52E-67  | 144. 1447 |
| CPVL         | 3. 012097 | 3. 339657 | 29. 53688 | 4. 45E-93  | 1. 31E-91  | 200. 5481 |
| PRR15        | 3. 479463 | 2. 749007 | 41. 31456 | 9. 90E-130 | 2. 76E-127 | 285. 1278 |
| SCRN1        | 1. 11491  | 3. 713522 | 14. 7824  | 5. 52E-38  | 3. 20E-37  | 73. 59261 |
| ZNRF2        | 1. 100923 | 2. 469439 | 21. 89215 | 2. 16E-65  | 2. 36E-64  | 136. 6998 |
| NOD1         | 1. 397962 | 1. 987249 | 24. 49083 | 4. 05E-75  | 5. 92E-74  | 159. 126  |
| GS1-114I9. 1 | 1. 611738 | 2. 253233 | 22. 64038 | 3. 21E-68  | 3. 77E-67  | 143. 2219 |
| GGCT         | 1. 84536  | 4. 535    | 30. 5745  | 1. 33E-96  | 4. 66E-95  | 208. 6805 |
| GARS         | 1. 60714  | 5. 408224 | 22. 07938 | 4. 22E-66  | 4. 67E-65  | 138. 3364 |
| INMT         | 1. 227662 | 2. 870587 | 12. 92012 | 5. 67E-31  | 2. 85E-30  | 57. 48021 |
| FAM188B      | 1. 274619 | 1. 933057 | 27. 48348 | 6. 26E-86  | 1. 32E-84  | 184. 0596 |
| LSM5         | 1. 115698 | 4. 974799 | 18. 09065 | 9. 15E-51  | 6. 88E-50  | 103. 0026 |
| AVL9         | 1. 560528 | 3. 135249 | 28. 82594 | 1. 25E-90  | 3. 28E-89  | 194. 8983 |
| KBTBD2       | 1. 685526 | 3. 324672 | 29. 5451  | 4. 17E-93  | 1. 23E-91  | 200. 613  |
| FKBP9        | 2. 089439 | 5. 125548 | 28. 57897 | 9. 01E-90  | 2. 26E-88  | 192. 921  |
| NT5C3A       | 1. 460607 | 4. 1467   | 20. 57978 | 2. 21E-60  | 2. 10E-59  | 125. 1543 |
| BBS9         | 1. 362478 | 2. 016267 | 25. 20909 | 9. 38E-78  | 1. 50E-76  | 165. 2035 |
| NPSR1        | 1. 543752 | 0. 741984 | 11. 80467 | 6. 61E-27  | 3. 05E-26  | 48. 14733 |
| DPY19L1      | 2. 105767 | 2. 618682 | 32. 66386 | 1. 60E-103 | 8. 22E-102 | 224. 6468 |
| 7-Sep        | 2. 512897 | 5. 089573 | 36. 31713 | 4. 66E-115 | 4. 86E-113 | 251. 2654 |
| EEPDI        | 1. 74637  | 4. 017829 | 21. 78298 | 5. 62E-65  | 6. 04E-64  | 135. 7443 |
| ANLN         | 2. 861193 | 1. 632832 | 37. 60307 | 5. 94E-119 | 7. 86E-117 | 260. 2526 |
| AOAH         | 1. 864167 | 1. 774905 | 21. 67759 | 1. 41E-64  | 1. 50E-63  | 134. 8209 |
| AC007349. 4  | -1. 10907 | 0. 717529 | -23. 798  | 1. 49E-72  | 2. 00E-71  | 153. 2113 |
| ELMO1        | 1. 623465 | 2. 688827 | 18. 39327 | 6. 13E-52  | 4. 75E-51  | 105. 7058 |
| EPDR1        | 1. 785329 | 3. 0675   | 21. 1745  | 1. 17E-62  | 1. 18E-61  | 130. 4016 |
| SFRP4        | 5. 010091 | 3. 68403  | 36. 80816 | 1. 48E-116 | 1. 69E-114 | 254. 7202 |
| STARD3NL     | 1. 651378 | 3. 66089  | 28. 15418 | 2. 73E-88  | 6. 37E-87  | 189. 5024 |
| TRGC2        | 1. 028317 | 0. 797657 | 15. 81577 | 5. 95E-42  | 3. 73E-41  | 82. 71782 |
| VPS41        | 1. 305213 | 3. 845178 | 19. 8833  | 1. 06E-57  | 9. 38E-57  | 118. 9817 |
| YAE1D1       | 1. 095486 | 3. 218278 | 20. 88354 | 1. 52E-61  | 1. 48E-60  | 127. 8374 |
| RALA         | 2. 619756 | 3. 71103  | 42. 5622  | 3. 31E-133 | 1. 24E-130 | 293. 1497 |
| SUGCT        | 3. 500426 | 2. 333136 | 34. 10087 | 3. 81E-108 | 2. 56E-106 | 235. 3121 |
| INHBA        | 4. 095145 | 2. 159647 | 39. 63203 | 6. 29E-125 | 1. 19E-122 | 274. 0426 |
| GLI3         | 1. 142788 | 0. 964437 | 19. 10725 | 1. 05E-54  | 8. 70E-54  | 112. 0763 |
| PSMA2        | 1. 507399 | 2. 717866 | 32. 98383 | 1. 46E-104 | 7. 95E-103 | 227. 0436 |
| STK17A       | 1. 497418 | 3. 301274 | 21. 06199 | 3. 15E-62  | 3. 14E-61  | 129. 4107 |
| BLVRA        | 2. 278507 | 4. 314333 | 35. 5944  | 7. 84E-113 | 7. 00E-111 | 246. 1283 |
| URGCP        | 1. 077783 | 3. 647607 | 20. 54525 | 3. 00E-60  | 2. 84E-59  | 124. 8489 |
| DBNL         | 2. 176463 | 5. 282691 | 33. 34332 | 1. 01E-105 | 5. 88E-104 | 229. 7215 |
| AEBP1        | 4. 337089 | 5. 849762 | 36. 35231 | 3. 63E-115 | 3. 80E-113 | 251. 5139 |
| NUDCD3       | 1. 81087  | 4. 657147 | 28. 23082 | 1. 47E-88  | 3. 48E-87  | 190. 1208 |
| NPC1L1       | 2. 516889 | 1. 536968 | 24. 09993 | 1. 13E-73  | 1. 57E-72  | 155. 7951 |
| DDX56        | 1. 334448 | 5. 068358 | 20. 04912 | 2. 43E-58  | 2. 19E-57  | 120. 4537 |
| TMED4        | 1. 01098  | 5. 264234 | 17. 07513 | 7. 97E-47  | 5. 54E-46  | 93. 9312  |
| OGDH         | 1. 829591 | 4. 360215 | 29. 79776 | 5. 71E-94  | 1. 76E-92  | 202. 6054 |
| PPIA         | 2. 203122 | 9. 439839 | 24. 0113  | 2. 40E-73  | 3. 30E-72  | 155. 0377 |
| H2AFV        | 2. 034985 | 5. 708025 | 32. 72858 | 9. 84E-104 | 5. 11E-102 | 225. 1326 |
| PURB         | 1. 216719 | 2. 519307 | 25. 85136 | 4. 33E-80  | 7. 44E-79  | 170. 5894 |
| MYO1G        | 1. 764998 | 1. 416413 | 24. 07006 | 1. 46E-73  | 2. 02E-72  | 155. 54   |

|              |          |          |          |           |           |          |
|--------------|----------|----------|----------|-----------|-----------|----------|
| SNHG15       | 1.313187 | 3.886013 | 17.56504 | 1.00E-48  | 7.23E-48  | 98.30661 |
| CCM2         | 1.728564 | 4.380743 | 28.21093 | 1.73E-88  | 4.07E-87  | 189.9604 |
| NACAD        | 1.02891  | 0.995405 | 16.34798 | 5.23E-44  | 3.42E-43  | 87.44803 |
| TBRG4        | 1.372641 | 4.54103  | 21.67796 | 1.41E-64  | 1.50E-63  | 134.8242 |
| RAMP3        | 1.376005 | 3.583177 | 15.27913 | 6.91E-40  | 4.16E-39  | 77.96737 |
| IGFBP1       | 1.421889 | 0.7683   | 13.54004 | 2.79E-33  | 1.47E-32  | 62.78224 |
| IGFBP3       | 5.543404 | 5.11963  | 46.88282 | 1.04E-144 | 9.43E-142 | 319.6966 |
| AC004870.4   | 1.258546 | 0.945222 | 12.89972 | 6.74E-31  | 3.39E-30  | 57.30705 |
| HUS1         | 1.026911 | 2.746484 | 20.07241 | 1.98E-58  | 1.78E-57  | 120.6603 |
| UPP1         | 2.569253 | 3.922236 | 29.6977  | 1.25E-93  | 3.79E-92  | 201.8173 |
| IKZF1        | 1.565153 | 1.196016 | 18.63926 | 6.82E-53  | 5.39E-52  | 107.9019 |
| FIGNL1       | 1.006387 | 1.476895 | 21.67118 | 1.50E-64  | 1.59E-63  | 134.7648 |
| GRB10        | -1.2678  | 5.002762 | -14.5966 | 2.82E-37  | 1.61E-36  | 71.96296 |
| VOPP1        | 2.73642  | 4.451237 | 43.73609 | 2.06E-136 | 9.91E-134 | 300.5481 |
| MRPS17       | 1.115653 | 3.05837  | 23.01233 | 1.28E-69  | 1.57E-68  | 146.4455 |
| CCT6A        | 1.378957 | 6.037493 | 19.17791 | 5.60E-55  | 4.66E-54  | 112.706  |
| SUMF2        | 1.238985 | 6.180632 | 17.71158 | 2.71E-49  | 1.98E-48  | 99.61589 |
| CHCHD2       | 1.329099 | 7.419867 | 16.58079 | 6.57E-45  | 4.38E-44  | 89.52166 |
| ERV3-1       | 1.134981 | 2.509125 | 10.49287 | 2.61E-22  | 1.09E-21  | 37.61206 |
| VKORC1L1     | 1.660727 | 2.892113 | 32.26036 | 3.32E-102 | 1.57E-100 | 221.6058 |
| GUSB         | 1.53681  | 4.975407 | 26.14501 | 3.77E-81  | 6.70E-80  | 173.0361 |
| ASL          | 1.529795 | 4.949465 | 19.4829  | 3.71E-56  | 3.18E-55  | 115.4219 |
| CRCP         | 1.253147 | 3.423785 | 22.11003 | 3.23E-66  | 3.59E-65  | 138.6039 |
| TPST1        | 1.809274 | 2.891748 | 24.23239 | 3.65E-74  | 5.16E-73  | 156.9257 |
| RP4-756H11.5 | 1.763349 | 3.29533  | 26.39732 | 4.65E-82  | 8.56E-81  | 175.1304 |
| RPL35P5      | 1.812871 | 2.299667 | 22.92988 | 2.61E-69  | 3.17E-68  | 145.7321 |
| TMEM248      | 1.585735 | 4.866084 | 27.00016 | 3.25E-84  | 6.45E-83  | 180.1037 |
| SBDS         | 1.361462 | 5.498041 | 18.95293 | 4.16E-54  | 3.38E-53  | 110.7005 |
| TYW1         | 1.132032 | 2.6853   | 24.42248 | 7.24E-75  | 1.05E-73  | 158.5448 |
| PMS2P4       | 1.305355 | 1.498909 | 27.80264 | 4.68E-87  | 1.03E-85  | 186.6565 |
| P11-313P13.  | 1.15398  | 2.118103 | 20.98524 | 6.19E-62  | 6.12E-61  | 128.7343 |
| GTF2IP4      | 1.129384 | 4.851557 | 13.666   | 9.39E-34  | 4.99E-33  | 63.8679  |
| NCF1B        | 1.386947 | 1.031477 | 16.80238 | 9.10E-46  | 6.18E-45  | 91.49738 |
| TRIM50       | -3.02582 | 2.10447  | -33.1726 | 3.58E-105 | 2.02E-103 | 228.4515 |
| BAZ1B        | 1.526425 | 3.501264 | 26.27843 | 1.25E-81  | 2.25E-80  | 174.1445 |
| BCL7B        | 1.828525 | 4.571253 | 31.60874 | 4.66E-100 | 1.95E-98  | 216.6521 |
| WBSCR22      | 1.880478 | 5.453641 | 30.91273 | 9.71E-98  | 3.60E-96  | 211.3022 |
| STX1A        | 2.120343 | 3.759406 | 19.51927 | 2.68E-56  | 2.30E-55  | 115.7456 |
| ABHD11-AS1   | 2.619917 | 2.358038 | 22.38234 | 3.02E-67  | 3.45E-66  | 140.9781 |
| ABHD11       | 1.019566 | 4.918986 | 11.96974 | 1.68E-27  | 7.90E-27  | 49.50922 |
| CLDN4        | 2.776559 | 6.644368 | 24.47322 | 4.71E-75  | 6.86E-74  | 158.9763 |
| LIMK1        | 2.268188 | 3.458468 | 35.10644 | 2.59E-111 | 2.11E-109 | 242.6243 |
| LAT2         | 2.143012 | 2.444465 | 24.42573 | 7.04E-75  | 1.02E-73  | 158.5724 |
| RFC2         | 1.566373 | 3.372526 | 24.38231 | 1.02E-74  | 1.47E-73  | 158.2029 |
| CLIP2        | 1.330368 | 3.500806 | 20.98766 | 6.06E-62  | 5.99E-61  | 128.7556 |
| GTF2IRD1     | 2.112331 | 3.478887 | 28.01206 | 8.60E-88  | 1.96E-86  | 188.3537 |
| NCF1         | 2.175275 | 1.866131 | 22.39171 | 2.78E-67  | 3.18E-66  | 141.0597 |
| WBSCR16      | 1.313561 | 4.164322 | 24.38861 | 9.66E-75  | 1.39E-73  | 158.2566 |
| NCF1C        | 1.718545 | 1.205188 | 21.3274  | 3.05E-63  | 3.13E-62  | 131.7468 |
| NSUN5P1      | -1.06161 | 4.508329 | -11.676  | 1.91E-26  | 8.74E-26  | 47.09055 |
| HIP1         | 1.871124 | 2.208034 | 30.10666 | 5.08E-95  | 1.65E-93  | 205.0304 |
| CCL26        | 1.789247 | 1.067697 | 22.40292 | 2.52E-67  | 2.89E-66  | 141.1573 |
| CCL24        | 2.5441   | 1.276292 | 22.16986 | 1.92E-66  | 2.14E-65  | 139.1262 |
| RHBDD2       | 2.215025 | 5.421352 | 32.1842  | 5.90E-102 | 2.74E-100 | 221.0296 |

|           |          |          |          |           |           |          |
|-----------|----------|----------|----------|-----------|-----------|----------|
| POR       | 1.98829  | 5.371968 | 19.51912 | 2.69E-56  | 2.31E-55  | 115.7442 |
| STYXL1    | 1.47867  | 4.75041  | 22.83317 | 6.03E-69  | 7.25E-68  | 144.8944 |
| MDH2      | 1.31819  | 6.223044 | 18.23816 | 2.45E-51  | 1.87E-50  | 104.3204 |
| SRRM3     | 1.017301 | 1.705745 | 14.66177 | 1.59E-37  | 9.15E-37  | 72.53409 |
| HSPB1     | 2.194017 | 8.741623 | 15.92348 | 2.28E-42  | 1.45E-41  | 83.67377 |
| YWHAG     | 2.273131 | 4.762085 | 32.32192 | 2.09E-102 | 1.00E-100 | 222.0711 |
| ZP3       | 1.399587 | 2.434087 | 15.82116 | 5.67E-42  | 3.56E-41  | 82.76563 |
| DTX2      | 2.025567 | 3.801914 | 26.84691 | 1.14E-83  | 2.22E-82  | 178.8435 |
| UPK3B     | 1.581223 | 1.390596 | 11.57548 | 4.36E-26  | 1.98E-25  | 46.26873 |
| FGL2      | 2.158163 | 1.905264 | 22.68228 | 2.23E-68  | 2.64E-67  | 143.5856 |
| PTPN12    | 2.053942 | 4.267128 | 26.51471 | 1.76E-82  | 3.29E-81  | 176.1022 |
| APTR      | 1.017142 | 3.751607 | 14.34607 | 2.53E-36  | 1.42E-35  | 69.77199 |
| TMEM60    | 1.261145 | 3.538317 | 25.09609 | 2.43E-77  | 3.81E-76  | 164.2511 |
| PHTF2     | 1.622467 | 2.176247 | 26.58799 | 9.63E-83  | 1.82E-81  | 176.708  |
| MAG12-AS3 | 1.386348 | 2.463905 | 15.85378 | 4.24E-42  | 2.67E-41  | 83.05508 |
| GNAI1     | 2.046682 | 2.468959 | 26.39974 | 4.56E-82  | 8.40E-81  | 175.1504 |
| SEMA3C    | 3.733178 | 2.324409 | 31.14797 | 1.59E-98  | 6.13E-97  | 213.1172 |
| HGF       | 1.158007 | 1.170967 | 16.96745 | 2.08E-46  | 1.44E-45  | 92.97013 |
| CACNA2D1  | 1.291972 | 1.038208 | 21.17655 | 1.15E-62  | 1.16E-61  | 130.4196 |
| SEMA3A    | 1.35018  | 0.74381  | 20.86053 | 1.86E-61  | 1.81E-60  | 127.6343 |
| TP53TG1   | 2.479042 | 3.782736 | 40.55788 | 1.38E-127 | 3.17E-125 | 280.181  |
| TP53TG1_2 | 1.517301 | 1.574221 | 9.872553 | 3.19E-20  | 1.28E-19  | 32.83695 |
| CROT      | 1.281321 | 2.311585 | 25.45611 | 1.18E-78  | 1.93E-77  | 167.2805 |
| ABCB4     | 1.119526 | 0.655342 | 20.96644 | 7.30E-62  | 7.21E-61  | 128.5685 |
| ABCB1     | 1.612078 | 1.898838 | 17.97203 | 2.64E-50  | 1.97E-49  | 101.9429 |
| SLC25A40  | 1.133177 | 2.56301  | 18.98864 | 3.03E-54  | 2.47E-53  | 111.0189 |
| DBF4      | 1.167167 | 1.92609  | 23.7371  | 2.51E-72  | 3.34E-71  | 152.6892 |
| ADAM22    | 1.295181 | 0.967251 | 21.854   | 3.02E-65  | 3.27E-64  | 136.366  |
| SRI       | 2.262338 | 6.176483 | 28.4051  | 3.63E-89  | 8.85E-88  | 191.5244 |
| STEAP1    | 2.826268 | 3.121833 | 32.65667 | 1.69E-103 | 8.64E-102 | 224.5927 |
| STEAP2    | 1.720912 | 2.602865 | 23.63702 | 5.92E-72  | 7.74E-71  | 151.8301 |
| GTPBP10   | 1.299818 | 2.802156 | 23.27085 | 1.38E-70  | 1.74E-69  | 148.6785 |
| CLDN12    | 1.607379 | 3.778265 | 21.29836 | 3.94E-63  | 4.02E-62  | 131.4914 |
| CDK14     | 1.344283 | 2.612432 | 16.80156 | 9.16E-46  | 6.23E-45  | 91.49007 |
| FZD1      | 1.68885  | 2.235852 | 24.12428 | 9.17E-74  | 1.28E-72  | 156.0031 |
| CYP51A1   | 1.808177 | 4.275031 | 23.78126 | 1.72E-72  | 2.30E-71  | 153.0679 |
| CDK6      | 1.41386  | 2.188754 | 23.75804 | 2.10E-72  | 2.79E-71  | 152.8688 |
| SAMD9     | 2.767077 | 1.953508 | 37.62196 | 5.21E-119 | 6.92E-117 | 260.3831 |
| SAMD9L    | 2.147355 | 2.142244 | 28.82048 | 1.31E-90  | 3.43E-89  | 194.8547 |
| GNG11     | 1.652681 | 2.807228 | 21.74935 | 7.55E-65  | 8.08E-64  | 135.4498 |
| COL1A2    | 5.811973 | 7.098357 | 41.87416 | 2.68E-131 | 8.53E-129 | 288.7464 |
| SGCE      | 1.55488  | 3.547916 | 19.76709 | 2.97E-57  | 2.61E-56  | 117.9493 |
| PON2      | 2.018618 | 5.016464 | 26.36828 | 5.92E-82  | 1.08E-80  | 174.8897 |
| PDK4      | -1.41936 | 5.27326  | -8.19881 | 6.08E-15  | 2.15E-14  | 20.78599 |
| SLC25A13  | 1.331719 | 3.011523 | 24.06041 | 1.58E-73  | 2.19E-72  | 155.4575 |
| SHFM1     | 2.74207  | 6.53881  | 35.71513 | 3.31E-113 | 3.05E-111 | 246.9908 |
| SDHAF3    | 1.337157 | 3.153764 | 23.63636 | 5.95E-72  | 7.78E-71  | 151.8244 |
| BHLHA15   | -5.38344 | 4.091218 | -36.9798 | 4.47E-117 | 5.21E-115 | 255.9213 |
| TECPR1    | -1.43791 | 4.231452 | -16.5161 | 1.17E-44  | 7.75E-44  | 88.94565 |
| BRI3      | 1.258925 | 7.079607 | 15.76182 | 9.60E-42  | 5.99E-41  | 82.23932 |
| BAIAP2L1  | 1.692132 | 4.456544 | 18.14    | 5.89E-51  | 4.45E-50  | 103.4435 |
| TMEM130   | 1.769065 | 1.162747 | 23.70049 | 3.43E-72  | 4.54E-71  | 152.375  |
| TRRAP     | 1.008615 | 2.448498 | 18.74339 | 2.69E-53  | 2.15E-52  | 108.8312 |
| SMURF1    | 1.592947 | 3.466542 | 20.3264  | 2.08E-59  | 1.92E-58  | 122.9118 |

|              |          |          |          |           |           |          |
|--------------|----------|----------|----------|-----------|-----------|----------|
| KPNA7        | 1.42408  | 0.743279 | 22.78917 | 8.83E-69  | 1.06E-67  | 144.513  |
| MYH16        | 1.105216 | 0.53799  | 14.42656 | 1.25E-36  | 7.05E-36  | 70.47504 |
| ARPC1A       | 2.099967 | 5.775844 | 28.3865  | 4.22E-89  | 1.02E-87  | 191.3748 |
| ARPC1B       | 3.62029  | 6.400005 | 41.84248 | 3.28E-131 | 1.03E-128 | 288.5424 |
| PDAP1        | 1.739369 | 5.901204 | 24.60206 | 1.58E-75  | 2.33E-74  | 160.0708 |
| BUD31        | 2.168402 | 5.497709 | 31.67044 | 2.91E-100 | 1.23E-98  | 217.1235 |
| ATP5J2-PTCD1 | 1.377208 | 1.524062 | 28.20335 | 1.84E-88  | 4.32E-87  | 189.8993 |
| ATP5J2       | 2.267903 | 7.706517 | 29.11789 | 1.23E-91  | 3.39E-90  | 197.2261 |
| ZNF394       | 1.648426 | 3.2072   | 31.03652 | 3.74E-98  | 1.42E-96  | 212.2582 |
| ZKSCAN5      | 1.26056  | 1.618997 | 31.07371 | 2.81E-98  | 1.07E-96  | 212.545  |
| FAM200A      | 1.052064 | 1.703505 | 25.03415 | 4.09E-77  | 6.36E-76  | 163.7285 |
| CYP3A4       | -1.71021 | 1.546289 | -8.79819 | 9.08E-17  | 3.35E-16  | 24.94772 |
| CYP3A43      | -1.56488 | 0.855661 | -12.0202 | 1.11E-27  | 5.21E-27  | 49.92689 |
| GJC3         | -1.61046 | 1.388463 | -24.1071 | 1.06E-73  | 1.48E-72  | 155.8562 |
| AZGP1        | -2.09677 | 6.803887 | -14.4764 | 8.09E-37  | 4.57E-36  | 70.91063 |
| COPS6        | 1.74554  | 5.730826 | 28.28761 | 9.34E-89  | 2.23E-87  | 190.5786 |
| AP4M1        | 1.017898 | 3.68807  | 16.89022 | 4.15E-46  | 2.84E-45  | 92.28101 |
| TAF6         | 1.468513 | 4.270703 | 23.03596 | 1.04E-69  | 1.28E-68  | 146.6499 |
| CNPY4        | 2.30652  | 2.71402  | 34.18297 | 2.09E-108 | 1.43E-106 | 235.9137 |
| LAMTOR4      | 1.903839 | 6.464059 | 26.22037 | 2.01E-81  | 3.62E-80  | 173.6624 |
| GAL3ST4      | 2.216298 | 1.698818 | 31.68374 | 2.63E-100 | 1.12E-98  | 217.225  |
| SPDYE3       | 1.109083 | 1.13403  | 29.50484 | 5.73E-93  | 1.68E-91  | 200.2948 |
| PMS2P1       | 1.70861  | 1.779558 | 37.78992 | 1.64E-119 | 2.23E-117 | 261.5423 |
| STAG3L5P     | -1.2759  | 3.958392 | -14.0723 | 2.76E-35  | 1.51E-34  | 67.38735 |
| PILRB        | -1.13161 | 4.292739 | -11.1001 | 2.08E-24  | 9.11E-24  | 42.42089 |
| PILRA        | 1.718128 | 2.510901 | 18.06677 | 1.13E-50  | 8.51E-50  | 102.7894 |
| MEPCE        | 1.495489 | 3.905062 | 25.62571 | 2.85E-79  | 4.78E-78  | 168.7025 |
| PPP1R35      | 1.164657 | 4.250851 | 15.12117 | 2.79E-39  | 1.66E-38  | 76.57362 |
| TSC22D4      | 1.560872 | 4.577956 | 21.83668 | 3.52E-65  | 3.80E-64  | 136.2144 |
| AGFG2        | 1.149951 | 4.172884 | 13.7662  | 3.94E-34  | 2.11E-33  | 64.73349 |
| PCOLCE       | 2.461532 | 5.339535 | 23.38803 | 5.02E-71  | 6.41E-70  | 149.6885 |
| MOSPD3       | 1.467684 | 3.819304 | 23.85485 | 9.15E-73  | 1.23E-71  | 153.6986 |
| GNB2         | 1.760355 | 6.944284 | 22.02982 | 6.51E-66  | 7.17E-65  | 137.9034 |
| POP7         | 1.395138 | 4.227053 | 23.40548 | 4.32E-71  | 5.53E-70  | 149.8387 |
| EPO          | -1.57108 | 1.018996 | -28.4424 | 2.69E-89  | 6.60E-88  | 191.824  |
| EPHB4        | 1.739552 | 4.446255 | 24.63978 | 1.15E-75  | 1.71E-74  | 160.3909 |
| SLC12A9      | 1.388015 | 3.814827 | 22.16514 | 2.00E-66  | 2.23E-65  | 139.0849 |
| TRIP6        | 1.572209 | 5.166421 | 19.699   | 5.43E-57  | 4.74E-56  | 117.3441 |
| ACHE         | 1.759241 | 2.200407 | 15.65079 | 2.57E-41  | 1.59E-40  | 81.25505 |
| MUC3A        | 4.004327 | 2.906801 | 29.3516  | 1.92E-92  | 5.48E-91  | 199.0817 |
| MUC12        | 2.406693 | 1.317472 | 33.84931 | 2.41E-107 | 1.53E-105 | 233.4635 |
| RP11-395B7.4 | 2.912158 | 1.491386 | 34.01179 | 7.32E-108 | 4.82E-106 | 234.6584 |
| MUC17        | 2.224922 | 1.070607 | 15.91564 | 2.45E-42  | 1.55E-41  | 83.60416 |
| RN7SKP54     | 3.3911   | 1.633344 | 18.31339 | 1.25E-51  | 9.62E-51  | 104.9924 |
| TRIM56       | 1.243318 | 2.769737 | 21.49851 | 6.80E-64  | 7.08E-63  | 133.2501 |
| SERPINE1     | 3.696324 | 4.590957 | 24.89239 | 1.35E-76  | 2.07E-75  | 162.5308 |
| AP1S1        | 2.309385 | 4.683302 | 36.38402 | 2.91E-115 | 3.06E-113 | 251.7378 |
| PLOD3        | 1.822267 | 5.174728 | 25.5526  | 5.25E-79  | 8.72E-78  | 168.0899 |
| ZNHIT1       | 1.973509 | 5.332879 | 29.8466  | 3.89E-94  | 1.21E-92  | 202.9896 |
| FIS1         | 1.254735 | 6.807766 | 17.86441 | 6.91E-50  | 5.11E-49  | 100.9814 |
| IFT22        | 1.666418 | 3.845732 | 29.66393 | 1.64E-93  | 4.92E-92  | 201.5511 |
| CUX1         | 1.699228 | 4.873743 | 29.00091 | 3.11E-91  | 8.42E-90  | 196.2946 |
| SH2B2        | 1.197306 | 1.410033 | 22.80748 | 7.53E-69  | 9.02E-68  | 144.6717 |
| ORAI2        | 1.925504 | 2.549292 | 30.15707 | 3.42E-95  | 1.12E-93  | 205.425  |

|              |           |           |           |            |            |           |
|--------------|-----------|-----------|-----------|------------|------------|-----------|
| ALKBH4       | 1. 274457 | 2. 486651 | 28. 56439 | 1. 01E-89  | 2. 53E-88  | 192. 804  |
| LRWD1        | 1. 217971 | 2. 91252  | 23. 22883 | 1. 98E-70  | 2. 49E-69  | 148. 3159 |
| POLR2J       | 1. 644699 | 5. 27426  | 26. 86315 | 1. 00E-83  | 1. 95E-82  | 178. 9772 |
| POLR2J2      | 1. 367644 | 2. 748487 | 11. 82906 | 5. 40E-27  | 2. 50E-26  | 48. 34814 |
| LRRC17       | 1. 556593 | 1. 788203 | 16. 02323 | 9. 41E-43  | 6. 00E-42  | 84. 55978 |
| ARMC10       | 1. 417035 | 4. 173302 | 23. 17543 | 3. 13E-70  | 3. 92E-69  | 147. 855  |
| NAPEPLD      | 1. 268698 | 2. 449155 | 22. 67855 | 2. 30E-68  | 2. 72E-67  | 143. 5533 |
| DNAJC2       | 1. 193711 | 3. 715571 | 21. 27152 | 4. 99E-63  | 5. 08E-62  | 131. 2553 |
| PSMC2        | 1. 96923  | 4. 468674 | 32. 08955 | 1. 21E-101 | 5. 50E-100 | 220. 3125 |
| SRPK2        | 1. 238312 | 3. 14417  | 21. 63377 | 2. 08E-64  | 2. 20E-63  | 134. 4368 |
| ATXN7L1      | 1. 09877  | 1. 75914  | 24. 15331 | 7. 16E-74  | 1. 00E-72  | 156. 2509 |
| SYPL1        | 1. 907642 | 5. 308309 | 26. 96402 | 4. 37E-84  | 8. 63E-83  | 179. 8068 |
| NAMPT        | 1. 838475 | 4. 941723 | 15. 72102 | 1. 38E-41  | 8. 58E-41  | 81. 87748 |
| CCDC71L      | 2. 009475 | 2. 946375 | 31. 00537 | 4. 75E-98  | 1. 80E-96  | 212. 0178 |
| RP5-884M6. 1 | 1. 347103 | 0. 644191 | 18. 64409 | 6. 54E-53  | 5. 17E-52  | 107. 9451 |
| PIK3CG       | 1. 087819 | 0. 665917 | 20. 29184 | 2. 83E-59  | 2. 60E-58  | 122. 6057 |
| HBP1         | 1. 028362 | 4. 459871 | 15. 55471 | 6. 02E-41  | 3. 69E-40  | 80. 4041  |
| DUS4L        | 1. 042034 | 1. 895267 | 23. 26684 | 1. 43E-70  | 1. 80E-69  | 148. 6439 |
| BCAP29       | 1. 717301 | 3. 937952 | 28. 43347 | 2. 89E-89  | 7. 08E-88  | 191. 7526 |
| DLD          | 1. 137959 | 4. 493279 | 18. 3692  | 7. 60E-52  | 5. 88E-51  | 105. 4908 |
| LAMB1        | 1. 387749 | 5. 996543 | 14. 15664 | 1. 32E-35  | 7. 29E-35  | 68. 12079 |
| NRCAM        | -1. 45281 | 3. 014422 | -16. 2587 | 1. 16E-43  | 7. 52E-43  | 86. 6535  |
| PNPLA8       | 1. 438354 | 2. 993705 | 22. 46847 | 1. 43E-67  | 1. 65E-66  | 141. 7277 |
| IMMP2L       | 1. 024479 | 3. 02493  | 18. 88036 | 7. 94E-54  | 6. 43E-53  | 110. 0532 |
| ZNF277       | 1. 082178 | 3. 445797 | 18. 3177  | 1. 20E-51  | 9. 27E-51  | 105. 0308 |
| IFRD1        | -1. 34758 | 5. 095787 | -16. 7429 | 1. 55E-45  | 1. 05E-44  | 90. 96711 |
| LSMEM1       | -1. 22707 | 1. 728067 | -19. 2721 | 2. 42E-55  | 2. 03E-54  | 113. 5449 |
| TMEM168      | 1. 259121 | 2. 464772 | 17. 11469 | 5. 60E-47  | 3. 90E-46  | 94. 28443 |
| C7orf60      | 1. 121893 | 1. 642344 | 27. 99506 | 9. 87E-88  | 2. 24E-86  | 188. 2161 |
| LINC00998    | 1. 866962 | 4. 308887 | 31. 98394 | 2. 69E-101 | 1. 20E-99  | 219. 5109 |
| MDFIC        | 2. 273733 | 2. 434813 | 31. 46018 | 1. 45E-99  | 5. 89E-98  | 215. 5154 |
| TFEC         | 1. 06748  | 0. 898397 | 17. 49234 | 1. 92E-48  | 1. 38E-47  | 97. 65711 |
| TES          | 2. 261639 | 4. 355471 | 30. 55131 | 1. 59E-96  | 5. 54E-95  | 208. 5002 |
| CAV2         | 2. 277069 | 4. 498785 | 23. 67386 | 4. 31E-72  | 5. 68E-71  | 152. 1465 |
| CAV1         | 2. 76258  | 3. 990278 | 25. 11174 | 2. 13E-77  | 3. 35E-76  | 164. 3832 |
| MET          | 2. 997087 | 3. 166879 | 32. 42467 | 9. 63E-103 | 4. 68E-101 | 222. 8466 |
| CAPZA2       | 2. 159975 | 4. 864908 | 26. 73641 | 2. 83E-83  | 5. 44E-82  | 177. 9331 |
| WNT2         | 2. 753853 | 1. 370293 | 31. 65112 | 3. 37E-100 | 1. 43E-98  | 216. 9759 |
| LSM8         | 1. 985895 | 4. 221823 | 34. 44528 | 3. 09E-109 | 2. 23E-107 | 237. 8304 |
| KCND2        | 1. 091135 | 0. 633642 | 20. 93399 | 9. 72E-62  | 9. 56E-61  | 128. 2823 |
| CPED1        | 1. 789224 | 1. 451048 | 22. 29629 | 6. 38E-67  | 7. 22E-66  | 140. 2285 |
| FAM3C        | 1. 492268 | 5. 275234 | 18. 20542 | 3. 28E-51  | 2. 50E-50  | 104. 0279 |
| AASS         | -1. 47911 | 2. 702235 | -15. 6237 | 3. 27E-41  | 2. 02E-40  | 81. 01495 |
| FEZF1-AS1    | 1. 452855 | 0. 722347 | 15. 59962 | 4. 05E-41  | 2. 49E-40  | 80. 8018  |
| NDUFA5       | 1. 394806 | 4. 778754 | 23. 40817 | 4. 22E-71  | 5. 41E-70  | 149. 862  |
| WASL         | 1. 792928 | 3. 558973 | 29. 73237 | 9. 55E-94  | 2. 90E-92  | 202. 0905 |
| POT1         | 1. 502926 | 2. 70374  | 27. 4293  | 9. 73E-86  | 2. 05E-84  | 183. 6176 |
| GCC1         | 1. 422126 | 2. 396648 | 30. 83254 | 1. 80E-97  | 6. 61E-96  | 210. 682  |
| ARF5         | 1. 322495 | 6. 817801 | 18. 35355 | 8. 74E-52  | 6. 75E-51  | 105. 351  |
| HILPDA       | 1. 603888 | 3. 016419 | 15. 19145 | 1. 50E-39  | 8. 96E-39  | 77. 19345 |
| METTL2B      | 1. 047127 | 2. 685083 | 22. 42921 | 2. 01E-67  | 2. 31E-66  | 141. 3861 |
| CALU         | 2. 325793 | 5. 079267 | 28. 13492 | 3. 19E-88  | 7. 42E-87  | 189. 3469 |
| FLNC         | 2. 110795 | 1. 414104 | 22. 88852 | 3. 74E-69  | 4. 52E-68  | 145. 374  |
| KCP          | 1. 938135 | 1. 09758  | 24. 44598 | 5. 93E-75  | 8. 62E-74  | 158. 7447 |

|              |           |           |           |            |            |           |
|--------------|-----------|-----------|-----------|------------|------------|-----------|
| ATP6V1F      | 2. 503675 | 6. 251185 | 37. 59738 | 6. 18E-119 | 8. 16E-117 | 260. 2132 |
| P11-309L24.  | 1. 147281 | 0. 763982 | 17. 99308 | 2. 19E-50  | 1. 64E-49  | 102. 131  |
| IRF5         | 1. 317331 | 2. 721588 | 19. 72368 | 4. 36E-57  | 3. 82E-56  | 117. 5634 |
| TNPO3        | 1. 429294 | 3. 384684 | 25. 50247 | 8. 00E-79  | 1. 32E-77  | 167. 6695 |
| SMO          | 1. 164659 | 2. 373715 | 16. 6815  | 2. 67E-45  | 1. 80E-44  | 90. 4194  |
| AHCYL2       | 1. 780599 | 3. 330757 | 19. 34721 | 1. 24E-55  | 1. 05E-54  | 114. 2141 |
| STRIP2       | 1. 053665 | 0. 829568 | 18. 30196 | 1. 39E-51  | 1. 06E-50  | 104. 8903 |
| UBE2H        | 1. 271731 | 4. 827928 | 18. 66201 | 5. 57E-53  | 4. 41E-52  | 108. 105  |
| ZC3HC1       | 1. 17744  | 2. 598599 | 26. 53712 | 1. 47E-82  | 2. 74E-81  | 176. 2875 |
| CPA2         | -7. 71424 | 8. 741777 | -22. 3219 | 5. 10E-67  | 5. 80E-66  | 140. 4521 |
| CPA4         | -2. 35298 | 1. 887654 | -25. 324  | 3. 57E-78  | 5. 78E-77  | 166. 1702 |
| CPA1         | -8. 79506 | 10. 48701 | -21. 8631 | 2. 79E-65  | 3. 03E-64  | 136. 4457 |
| CEP41        | 1. 368317 | 2. 128154 | 25. 19512 | 1. 05E-77  | 1. 68E-76  | 165. 0858 |
| MEST         | 1. 378846 | 4. 288092 | 18. 39479 | 6. 05E-52  | 4. 69E-51  | 105. 7193 |
| COPG2        | 1. 473228 | 3. 007108 | 18. 2621  | 1. 98E-51  | 1. 51E-50  | 104. 5343 |
| MKLN1        | 1. 323052 | 2. 906497 | 25. 56923 | 4. 57E-79  | 7. 60E-78  | 168. 2293 |
| MKLN1-AS     | 1. 020363 | 1. 189894 | 20. 59721 | 1. 90E-60  | 1. 81E-59  | 125. 3083 |
| CHCHD3       | 1. 885975 | 4. 101864 | 33. 4192  | 5. 75E-106 | 3. 41E-104 | 230. 2847 |
| EXOC4        | 1. 197022 | 3. 968928 | 21. 78587 | 5. 48E-65  | 5. 90E-64  | 135. 7696 |
| SLC35B4      | 1. 125707 | 1. 679286 | 27. 74926 | 7. 22E-87  | 1. 58E-85  | 186. 223  |
| RP11-38M8. 1 | 1. 430833 | 0. 84241  | 26. 25885 | 1. 46E-81  | 2. 64E-80  | 173. 9819 |
| AKR1B1       | 1. 704655 | 4. 830971 | 23. 1528  | 3. 81E-70  | 4. 75E-69  | 147. 6597 |
| AKR1B10      | 4. 02461  | 2. 428724 | 25. 19368 | 1. 07E-77  | 1. 70E-76  | 165. 0737 |
| BPGM         | 2. 055133 | 2. 953051 | 33. 63266 | 1. 19E-106 | 7. 27E-105 | 231. 8651 |
| CALD1        | 3. 029624 | 5. 284774 | 27. 08476 | 1. 62E-84  | 3. 25E-83  | 180. 7982 |
| C7orf49      | 1. 20664  | 4. 089672 | 19. 9059  | 8. 65E-58  | 7. 69E-57  | 119. 1824 |
| TMEM140      | 1. 827828 | 3. 174995 | 27. 72316 | 8. 92E-87  | 1. 95E-85  | 186. 011  |
| CNOT4        | 1. 13424  | 2. 418958 | 25. 52386 | 6. 68E-79  | 1. 11E-77  | 167. 8489 |
| NUP205       | 1. 375145 | 3. 504762 | 25. 41906 | 1. 61E-78  | 2. 63E-77  | 166. 9694 |
| C7orf73      | 1. 89536  | 3. 760768 | 35. 88535 | 9. 88E-114 | 9. 41E-112 | 248. 2039 |
| FAM180A      | 1. 206011 | 0. 978001 | 18. 54657 | 1. 56E-52  | 1. 22E-51  | 107. 0746 |
| MTPN         | 2. 626398 | 4. 239703 | 38. 3427  | 3. 73E-121 | 5. 69E-119 | 265. 3342 |
| LUZP6        | 2. 282861 | 2. 696595 | 13. 81067 | 2. 68E-34  | 1. 44E-33  | 65. 1181  |
| PTN          | 1. 29636  | 1. 748935 | 10. 89883 | 1. 05E-23  | 4. 52E-23  | 40. 81332 |
| RPL41        | 1. 500229 | 11. 22305 | 13. 89701 | 1. 27E-34  | 6. 86E-34  | 65. 86575 |
| CREB3L2      | 1. 194743 | 3. 363721 | 20. 13103 | 1. 17E-58  | 1. 07E-57  | 121. 1802 |
| ZC3HAV1      | 1. 784686 | 2. 722051 | 33. 82969 | 2. 79E-107 | 1. 77E-105 | 233. 319  |
| TTC26        | 1. 029456 | 1. 189166 | 23. 95615 | 3. 85E-73  | 5. 25E-72  | 154. 5659 |
| TBXAS1       | 3. 154362 | 2. 748272 | 38. 15837 | 1. 31E-120 | 1. 92E-118 | 264. 0737 |
| PARP12       | 1. 464017 | 4. 296413 | 20. 17919 | 7. 67E-59  | 6. 99E-58  | 121. 6073 |
| JHDM1D-AS1   | 1. 355119 | 1. 265748 | 26. 69058 | 4. 13E-83  | 7. 90E-82  | 177. 5551 |
| MKRN1        | 1. 169889 | 5. 174563 | 17. 79723 | 1. 26E-49  | 9. 27E-49  | 100. 3811 |
| DENND2A      | 1. 308706 | 1. 373436 | 23. 70988 | 3. 17E-72  | 4. 20E-71  | 152. 4557 |
| ADCK2        | 1. 705763 | 3. 356444 | 31. 40404 | 2. 23E-99  | 8. 98E-98  | 215. 085  |
| NDUFB2       | 2. 005757 | 6. 767701 | 27. 98654 | 1. 06E-87  | 2. 40E-86  | 188. 1471 |
| AGK          | 1. 003496 | 2. 875862 | 19. 02928 | 2. 11E-54  | 1. 73E-53  | 111. 3813 |
| SSBP1        | 1. 804553 | 5. 929208 | 26. 26749 | 1. 36E-81  | 2. 46E-80  | 174. 0536 |
| CLEC5A       | 1. 328028 | 1. 352942 | 17. 39063 | 4. 76E-48  | 3. 39E-47  | 96. 74855 |
| TRBV7-9      | 1. 098682 | 0. 64922  | 15. 79305 | 7. 27E-42  | 4. 55E-41  | 82. 51626 |
| TRBV20-1     | 1. 617384 | 0. 899666 | 18. 79616 | 1. 68E-53  | 1. 35E-52  | 109. 3021 |
| TRBV25-1     | 3. 428575 | 2. 319435 | 32. 01038 | 2. 20E-101 | 9. 90E-100 | 219. 7118 |
| TRBC2        | 4. 378086 | 3. 314353 | 36. 75154 | 2. 20E-116 | 2. 49E-114 | 254. 3233 |
| PRSS2        | -7. 21852 | 12. 64892 | -20. 7105 | 6. 98E-61  | 6. 73E-60  | 126. 3095 |
| PRSS1        | -7. 93002 | 11. 83385 | -20. 8972 | 1. 34E-61  | 1. 32E-60  | 127. 958  |



|              |          |          |          |           |           |          |
|--------------|----------|----------|----------|-----------|-----------|----------|
| PRSS3P1      | -3.29038 | 2.26825  | -22.5188 | 9.21E-68  | 1.07E-66  | 142.1659 |
| TRPV6        | -2.05926 | 4.264666 | -14.2556 | 5.58E-36  | 3.10E-35  | 68.98298 |
| GSTK1        | 1.652693 | 6.648999 | 22.24427 | 1.00E-66  | 1.13E-65  | 139.7751 |
| TMEM139      | 1.713848 | 3.157175 | 19.53379 | 2.36E-56  | 2.03E-55  | 115.8747 |
| CASP2        | 1.443758 | 2.818059 | 27.52973 | 4.29E-86  | 9.14E-85  | 184.4368 |
| AC093673.5   | 2.527537 | 2.296715 | 39.3748  | 3.51E-124 | 6.28E-122 | 272.3203 |
| ZYX          | 2.333042 | 6.038719 | 26.62458 | 7.12E-83  | 1.35E-81  | 177.0103 |
| EPHA1        | 1.343273 | 3.140192 | 20.43237 | 8.15E-60  | 7.62E-59  | 123.8501 |
| RP11-61L23.2 | 1.395371 | 1.831303 | 17.81074 | 1.12E-49  | 8.23E-49  | 100.5018 |
| TCAF1        | 1.655221 | 3.175236 | 26.6711  | 4.85E-83  | 9.25E-82  | 177.3944 |
| CTAGE4       | 1.018674 | 1.889943 | 11.10138 | 2.06E-24  | 9.02E-24  | 42.43142 |
| ARHGEF35     | 1.87422  | 2.489215 | 18.77259 | 2.08E-53  | 1.66E-52  | 109.0918 |
| ARHGEF5      | 1.28569  | 3.405572 | 18.39689 | 5.94E-52  | 4.60E-51  | 105.738  |
| TPK1         | 1.541126 | 1.623781 | 31.18951 | 1.15E-98  | 4.47E-97  | 213.437  |
| CUL1         | 1.521825 | 3.814504 | 27.98856 | 1.04E-87  | 2.36E-86  | 188.1635 |
| PDIA4        | 1.484628 | 5.968495 | 18.28949 | 1.55E-51  | 1.19E-50  | 104.7789 |
| ZNF398       | 1.070627 | 1.781788 | 27.43178 | 9.53E-86  | 2.01E-84  | 183.6378 |
| RP4-800G7.1  | 1.04895  | 0.669225 | 11.96079 | 1.81E-27  | 8.50E-27  | 49.43521 |
| ZNF777       | 1.096057 | 2.410788 | 25.50421 | 7.88E-79  | 1.30E-77  | 167.6841 |
| ATP6V0E2     | 1.243857 | 3.759719 | 15.00926 | 7.48E-39  | 4.41E-38  | 75.58755 |
| LRRC61       | 1.107087 | 3.103937 | 17.31701 | 9.19E-48  | 6.50E-47  | 96.09107 |
| GIMAP8       | 1.041358 | 1.532507 | 14.58114 | 3.23E-37  | 1.84E-36  | 71.82753 |
| GIMAP7       | 1.361271 | 2.567082 | 13.5844  | 1.90E-33  | 1.01E-32  | 63.16431 |
| GIMAP4       | 2.050485 | 2.962871 | 23.13242 | 4.54E-70  | 5.65E-69  | 147.4836 |
| GIMAP6       | 1.157121 | 2.084094 | 13.39673 | 9.58E-33  | 5.00E-32  | 61.55022 |
| GIMAP2       | 2.646566 | 2.146808 | 35.89024 | 9.54E-114 | 9.13E-112 | 248.2386 |
| IMAP1-GIMAP  | 1.52526  | 1.351996 | 20.38532 | 1.24E-59  | 1.15E-58  | 123.4336 |
| GIMAP5       | 1.165467 | 2.534022 | 12.41671 | 4.02E-29  | 1.94E-28  | 53.23192 |
| TMEM176B     | 3.669265 | 5.799899 | 30.65061 | 7.36E-97  | 2.62E-95  | 209.2717 |
| TMEM176A     | 3.63177  | 5.264837 | 32.04336 | 1.71E-101 | 7.74E-100 | 219.9621 |
| AOC1         | 4.976402 | 2.554968 | 44.84361 | 2.22E-139 | 1.34E-136 | 307.3991 |
| KCNH2        | 1.156118 | 1.806732 | 11.53829 | 5.91E-26  | 2.68E-25  | 45.96534 |
| NOS3         | 1.593215 | 2.375075 | 18.91678 | 5.74E-54  | 4.66E-53  | 110.3781 |
| ATG9B        | 1.918719 | 1.292826 | 22.1899  | 1.61E-66  | 1.81E-65  | 139.301  |
| ABCB8        | 1.217018 | 3.586999 | 21.0476  | 3.57E-62  | 3.56E-61  | 129.2839 |
| CDK5         | 1.976012 | 2.919545 | 37.98445 | 4.31E-120 | 6.06E-118 | 262.8808 |
| FASTK        | 1.003052 | 5.394802 | 13.36796 | 1.23E-32  | 6.39E-32  | 61.30335 |
| ABCF2        | 1.463731 | 3.551415 | 25.0466  | 3.68E-77  | 5.74E-76  | 163.8336 |
| CHPF2        | 1.693212 | 4.120304 | 27.73273 | 8.25E-87  | 1.81E-85  | 186.0887 |
| NUB1         | 1.292463 | 4.673081 | 20.62893 | 1.43E-60  | 1.37E-59  | 125.5887 |
| RHEB         | 1.246167 | 5.727185 | 17.37168 | 5.64E-48  | 4.01E-47  | 96.57932 |
| PRKAG2       | 1.091291 | 3.143716 | 19.06453 | 1.54E-54  | 1.27E-53  | 111.6955 |
| SHH          | 2.381696 | 1.247159 | 28.87222 | 8.65E-91  | 2.29E-89  | 195.268  |
| AC021218.2   | 1.602773 | 0.796477 | 19.28313 | 2.19E-55  | 1.84E-54  | 113.6433 |
| LINC01006    | 1.415758 | 2.692062 | 22.23932 | 1.05E-66  | 1.18E-65  | 139.732  |
| LMBR1        | 1.51079  | 3.1715   | 26.57227 | 1.10E-82  | 2.06E-81  | 176.5781 |
| MNX1-AS2     | -1.12179 | 1.559471 | -17.0707 | 8.29E-47  | 5.76E-46  | 93.89192 |
| UBE3C        | 1.276374 | 3.853229 | 19.9557  | 5.56E-58  | 4.96E-57  | 119.6245 |
| DNAJB6       | 1.930173 | 5.064908 | 28.51781 | 1.47E-89  | 3.65E-88  | 192.4302 |
| NCAPG2       | 1.654806 | 1.807142 | 29.7722  | 6.98E-94  | 2.14E-92  | 202.4042 |
| ESYT2        | 1.814898 | 4.144332 | 25.34337 | 3.04E-78  | 4.92E-77  | 166.3334 |
| WDR60        | 1.054066 | 2.472613 | 19.5441  | 2.15E-56  | 1.85E-55  | 115.9665 |
| VIPR2        | -2.13381 | 1.780926 | -31.5678 | 6.37E-100 | 2.64E-98  | 216.3389 |
| CLN8         | 1.06063  | 2.496275 | 20.21896 | 5.39E-59  | 4.93E-58  | 121.9598 |

|              |          |          |          |           |           |          |
|--------------|----------|----------|----------|-----------|-----------|----------|
| CTD-233602.1 | 1.52268  | 3.201415 | 26.14087 | 3.90E-81  | 6.93E-80  | 173.0016 |
| ANGPT2       | 1.805364 | 1.203659 | 27.06538 | 1.90E-84  | 3.80E-83  | 180.6392 |
| AGPAT5       | 1.316221 | 2.419073 | 24.30071 | 2.04E-74  | 2.91E-73  | 157.508  |
| SGK223       | 2.15254  | 2.145979 | 32.23149 | 4.13E-102 | 1.94E-100 | 221.3875 |
| CLDN23       | 2.349764 | 2.398315 | 25.5865  | 3.96E-79  | 6.60E-78  | 168.374  |
| MFHAS1       | 1.690599 | 2.233901 | 31.41417 | 2.06E-99  | 8.32E-98  | 215.1627 |
| ERI1         | 1.20829  | 1.724772 | 26.23572 | 1.77E-81  | 3.19E-80  | 173.7899 |
| PPP1R3B      | 2.058368 | 2.308624 | 30.39062 | 5.54E-96  | 1.88E-94  | 207.2491 |
| RP11-10A14.5 | 1.361651 | 0.75364  | 17.15583 | 3.88E-47  | 2.71E-46  | 94.65173 |
| SOX7         | 1.553665 | 1.66603  | 22.3449  | 4.18E-67  | 4.76E-66  | 140.6521 |
| PINX1        | 1.014465 | 2.644041 | 19.71567 | 4.68E-57  | 4.10E-56  | 117.4922 |
| TDH          | -2.32059 | 1.478669 | -25.9248 | 2.35E-80  | 4.07E-79  | 171.202  |
| AF131216.5   | -2.44222 | 1.598617 | -25.5097 | 7.52E-79  | 1.24E-77  | 167.7303 |
| FAM167A      | 1.07027  | 1.277344 | 15.611   | 3.66E-41  | 2.25E-40  | 80.90257 |
| BLK          | 1.024266 | 0.616526 | 9.888148 | 2.83E-20  | 1.14E-19  | 32.95515 |
| GATA4        | -1.13961 | 3.507757 | -10.8731 | 1.28E-23  | 5.54E-23  | 40.60858 |
| FDFT1        | 2.077843 | 5.550694 | 26.30714 | 9.82E-82  | 1.78E-80  | 174.3827 |
| CTSB         | 3.529571 | 7.500555 | 38.36093 | 3.30E-121 | 5.05E-119 | 265.4586 |
| P11-589N15.  | 1.362363 | 1.065316 | 19.60922 | 1.21E-56  | 1.05E-55  | 116.5458 |
| DLC1         | 1.09953  | 2.423288 | 13.6947  | 7.32E-34  | 3.90E-33  | 64.11571 |
| TUSC3        | 1.190325 | 4.463341 | 11.01578 | 4.10E-24  | 1.78E-23  | 41.74599 |
| MSR1         | 2.824484 | 2.408424 | 27.55641 | 3.46E-86  | 7.38E-85  | 184.6541 |
| CNOT7        | 1.09312  | 4.077673 | 16.81507 | 8.12E-46  | 5.53E-45  | 91.61058 |
| VPS37A       | 1.428277 | 3.259476 | 24.01195 | 2.39E-73  | 3.29E-72  | 155.0432 |
| SLC7A2       | -1.51825 | 3.301664 | -13.216  | 4.52E-32  | 2.33E-31  | 60.0015  |
| PDGFRL       | 1.356929 | 2.606541 | 14.19946 | 9.11E-36  | 5.03E-35  | 68.49364 |
| P11-806011.  | -1.01312 | 1.403679 | -12.1174 | 4.93E-28  | 2.34E-27  | 50.73324 |
| FGL1         | -4.93955 | 4.678057 | -23.3266 | 8.52E-71  | 1.08E-69  | 149.1589 |
| ASAH1        | 2.03081  | 5.431304 | 29.08971 | 1.53E-91  | 4.21E-90  | 197.0018 |
| NAT1         | 1.476109 | 1.565467 | 27.78961 | 5.20E-87  | 1.15E-85  | 186.5508 |
| SH2D4A       | 1.599596 | 3.340612 | 21.14385 | 1.53E-62  | 1.54E-61  | 130.1317 |
| CSGALNACT1   | 1.004145 | 2.409119 | 13.52599 | 3.15E-33  | 1.66E-32  | 62.66126 |
| LPL          | 1.080729 | 1.830371 | 9.028409 | 1.72E-17  | 6.48E-17  | 26.59395 |
| ATP6V1B2     | 1.504344 | 4.624727 | 21.64984 | 1.80E-64  | 1.91E-63  | 134.5777 |
| LZTS1        | 1.864956 | 1.531154 | 26.65104 | 5.73E-83  | 1.09E-81  | 177.2287 |
| DOK2         | 1.882012 | 1.804934 | 23.70351 | 3.35E-72  | 4.42E-71  | 152.401  |
| HR           | 1.879011 | 1.506009 | 25.57372 | 4.40E-79  | 7.33E-78  | 168.2669 |
| REEP4        | 1.580217 | 3.571234 | 22.96075 | 2.00E-69  | 2.44E-68  | 145.9992 |
| BMP1         | 2.086423 | 3.561385 | 25.6793  | 1.82E-79  | 3.07E-78  | 169.1512 |
| PHYHIP       | 1.534675 | 1.468508 | 26.50237 | 1.95E-82  | 3.64E-81  | 176.0001 |
| SLC39A14     | -1.11119 | 5.810177 | -11.7744 | 8.49E-27  | 3.91E-26  | 47.89799 |
| SORBS3       | 1.551942 | 5.443755 | 20.91256 | 1.17E-61  | 1.15E-60  | 128.0933 |
| PDLIM2       | 2.71667  | 4.403876 | 34.04716 | 5.65E-108 | 3.75E-106 | 234.918  |
| C8orf58      | 1.264057 | 2.406907 | 23.69271 | 3.67E-72  | 4.84E-71  | 152.3083 |
| CCAR2        | 1.215953 | 5.272722 | 18.77296 | 2.07E-53  | 1.65E-52  | 109.0951 |
| BIN3         | 1.818043 | 3.826471 | 29.18384 | 7.26E-92  | 2.03E-90  | 197.7504 |
| EGR3         | 1.789288 | 1.510051 | 18.40194 | 5.68E-52  | 4.40E-51  | 105.7832 |
| RHOBTB2      | 1.425951 | 2.483478 | 24.94702 | 8.53E-77  | 1.32E-75  | 162.9926 |
| TNFRSF10B    | 1.009842 | 4.623544 | 11.86431 | 4.04E-27  | 1.88E-26  | 48.63856 |
| TNFRSF10C    | 1.451881 | 1.356802 | 23.82288 | 1.20E-72  | 1.62E-71  | 153.4247 |
| TNFRSF10D    | 1.437967 | 1.869027 | 20.20554 | 6.07E-59  | 5.54E-58  | 121.8408 |
| P11-1149023. | 1.534163 | 1.100525 | 29.77665 | 6.74E-94  | 2.07E-92  | 202.4392 |
| TNFRSF10A    | 2.400974 | 2.08692  | 35.58026 | 8.67E-113 | 7.70E-111 | 246.0271 |
| P11-1149023. | 1.776806 | 1.404061 | 31.95529 | 3.34E-101 | 1.48E-99  | 219.2933 |

|               |           |           |           |            |            |           |
|---------------|-----------|-----------|-----------|------------|------------|-----------|
| CHMP7         | 1. 509388 | 3. 775123 | 26. 99425 | 3. 41E-84  | 6. 77E-83  | 180. 0552 |
| LOXL2         | 3. 196334 | 3. 221938 | 30. 193   | 2. 59E-95  | 8. 52E-94  | 205. 7061 |
| STC1          | 2. 533415 | 2. 448682 | 25. 77547 | 8. 16E-80  | 1. 39E-78  | 169. 9554 |
| ADAM28        | 3. 421892 | 3. 200083 | 32. 86395 | 3. 57E-104 | 1. 89E-102 | 226. 1471 |
| ADAMDEC1      | 1. 487887 | 0. 830692 | 19. 01394 | 2. 41E-54  | 1. 98E-53  | 111. 2445 |
| DOCK5         | 1. 439398 | 2. 441152 | 21. 4469  | 1. 07E-63  | 1. 11E-62  | 132. 7968 |
| KCTD9         | 1. 309164 | 3. 166722 | 19. 77044 | 2. 88E-57  | 2. 53E-56  | 117. 979  |
| CDCA2         | 1. 254105 | 0. 67362  | 30. 61609 | 9. 62E-97  | 3. 40E-95  | 209. 0036 |
| PPP2R2A       | 1. 425816 | 3. 921188 | 21. 31527 | 3. 39E-63  | 3. 47E-62  | 131. 6401 |
| BNIP3L        | 2. 356672 | 3. 968493 | 31. 85513 | 7. 14E-101 | 3. 13E-99  | 218. 5315 |
| PNMA2         | 1. 950678 | 1. 653318 | 23. 6848  | 3. 93E-72  | 5. 18E-71  | 152. 2404 |
| DPYSL2        | 2. 693565 | 3. 520849 | 36. 68029 | 3. 63E-116 | 4. 05E-114 | 253. 8233 |
| PTK2B         | 1. 394127 | 3. 475514 | 18. 12947 | 6. 47E-51  | 4. 88E-50  | 103. 3495 |
| EPHX2         | -1. 42668 | 4. 049511 | -17. 2505 | 1. 66E-47  | 1. 17E-46  | 95. 49685 |
| SCARA3        | 2. 316885 | 2. 325669 | 26. 38166 | 5. 30E-82  | 9. 72E-81  | 175. 0006 |
| ESCO2         | 1. 001185 | 0. 655976 | 23. 3308  | 8. 22E-71  | 1. 04E-69  | 149. 1954 |
| PBK           | 1. 773043 | 1. 035061 | 31. 29128 | 5. 28E-99  | 2. 09E-97  | 214. 2195 |
| ELP3          | 1. 434729 | 3. 135821 | 27. 50868 | 5. 10E-86  | 1. 08E-84  | 184. 2652 |
| PNOC          | 1. 261371 | 0. 668646 | 17. 74475 | 2. 01E-49  | 1. 48E-48  | 99. 91219 |
| EXTL3         | 1. 102654 | 2. 789045 | 18. 97737 | 3. 34E-54  | 2. 73E-53  | 110. 9184 |
| INTS9         | 1. 027451 | 2. 868743 | 21. 04583 | 3. 63E-62  | 3. 61E-61  | 129. 2683 |
| CTD-2647L4. 5 | 1. 586603 | 1. 685821 | 11. 03406 | 3. 54E-24  | 1. 54E-23  | 41. 89213 |
| KIF13B        | 1. 974957 | 3. 230854 | 26. 83616 | 1. 25E-83  | 2. 43E-82  | 178. 755  |
| DUSP4         | 1. 072209 | 3. 580502 | 11. 33069 | 3. 21E-25  | 1. 43E-24  | 44. 27889 |
| LEPROTL1      | 1. 953053 | 4. 072722 | 32. 45009 | 7. 95E-103 | 3. 90E-101 | 223. 0383 |
| DCTN6         | 1. 289408 | 4. 144176 | 22. 60333 | 4. 42E-68  | 5. 18E-67  | 142. 9001 |
| RBPM5         | 1. 037346 | 5. 657379 | 13. 50613 | 3. 73E-33  | 1. 96E-32  | 62. 49037 |
| GSR           | 1. 688818 | 4. 004492 | 27. 16007 | 8. 76E-85  | 1. 77E-83  | 181. 4157 |
| PPP2CB        | 1. 391179 | 5. 088813 | 20. 2459  | 4. 25E-59  | 3. 89E-58  | 122. 1986 |
| RP11-11N9. 4  | 1. 311845 | 0. 754585 | 20. 71995 | 6. 42E-61  | 6. 20E-60  | 126. 3931 |
| TTI2          | 1. 386123 | 2. 158601 | 32. 59862 | 2. 61E-103 | 1. 32E-101 | 224. 1565 |
| RNF122        | 1. 510759 | 2. 161586 | 22. 72    | 1. 61E-68  | 1. 91E-67  | 143. 913  |
| LSM12P1       | 1. 194665 | 2. 386174 | 16. 17387 | 2. 46E-43  | 1. 59E-42  | 85. 89882 |
| P11-150012.   | 1. 020542 | 0. 552761 | 17. 40161 | 4. 32E-48  | 3. 07E-47  | 96. 84664 |
| ZNF703        | 2. 659531 | 3. 367096 | 35. 69689 | 3. 77E-113 | 3. 44E-111 | 246. 8606 |
| ADGRA2        | 2. 482899 | 2. 754717 | 27. 38123 | 1. 44E-85  | 3. 00E-84  | 183. 2251 |
| BRF2          | 1. 468988 | 2. 752261 | 30. 27559 | 1. 36E-95  | 4. 52E-94  | 206. 3516 |
| RAB11FIP1     | 1. 020941 | 3. 968919 | 10. 376   | 6. 53E-22  | 2. 71E-21  | 36. 70122 |
| ASH2L         | 1. 267624 | 3. 740786 | 24. 32423 | 1. 67E-74  | 2. 39E-73  | 157. 7084 |
| LSM1          | 1. 530078 | 4. 371704 | 27. 78116 | 5. 57E-87  | 1. 23E-85  | 186. 4821 |
| BAG4          | 1. 498845 | 1. 948381 | 31. 77047 | 1. 36E-100 | 5. 86E-99  | 217. 8866 |
| WHSC1L1       | 1. 278473 | 3. 915063 | 21. 01323 | 4. 84E-62  | 4. 80E-61  | 128. 981  |
| LETM2         | 2. 22063  | 2. 209384 | 25. 25103 | 6. 59E-78  | 1. 06E-76  | 165. 5566 |
| P11-350N15.   | -2. 27928 | 1. 744052 | -31. 2651 | 6. 45E-99  | 2. 54E-97  | 214. 0184 |
| RPS20P22      | -1. 20862 | 0. 865738 | -27. 0879 | 1. 58E-84  | 3. 17E-83  | 180. 824  |
| PLEKHA2       | 2. 240549 | 2. 58931  | 23. 58541 | 9. 21E-72  | 1. 20E-70  | 151. 3867 |
| TM2D2         | 2. 214808 | 3. 920547 | 35. 06092 | 3. 59E-111 | 2. 91E-109 | 242. 2959 |
| ADAM9         | 3. 449757 | 4. 357245 | 34. 97547 | 6. 64E-111 | 5. 31E-109 | 241. 6789 |
| IDO1          | 2. 508383 | 1. 436332 | 22. 34724 | 4. 09E-67  | 4. 67E-66  | 140. 6724 |
| C8orf4        | 1. 753766 | 4. 716628 | 15. 05902 | 4. 82E-39  | 2. 86E-38  | 76. 02582 |
| SFRP1         | 1. 364644 | 1. 575092 | 11. 24409 | 6. 49E-25  | 2. 87E-24  | 43. 57925 |
| GOLGA7        | 1. 411857 | 4. 035947 | 25. 12109 | 1. 97E-77  | 3. 10E-76  | 164. 4619 |
| GINS4         | 1. 077865 | 0. 789814 | 25. 91953 | 2. 45E-80  | 4. 24E-79  | 171. 1583 |
| ANK1          | 1. 265616 | 1. 084426 | 17. 54353 | 1. 21E-48  | 8. 75E-48  | 98. 11449 |

|               |           |           |           |            |            |           |
|---------------|-----------|-----------|-----------|------------|------------|-----------|
| KAT6A         | 1. 037129 | 2. 420163 | 18. 34529 | 9. 41E-52  | 7. 26E-51  | 105. 2773 |
| AP3M2         | 1. 777707 | 2. 65338  | 31. 20547 | 1. 02E-98  | 3. 98E-97  | 213. 5598 |
| PLAT          | 5. 161208 | 4. 536576 | 40. 96893 | 9. 36E-129 | 2. 38E-126 | 282. 8759 |
| POLB          | 1. 784151 | 3. 857105 | 28. 49412 | 1. 78E-89  | 4. 40E-88  | 192. 24   |
| DKK4          | 1. 111756 | 0. 549434 | 13. 3518  | 1. 41E-32  | 7. 34E-32  | 61. 16475 |
| VDAC3         | 1. 193729 | 5. 480417 | 19. 57324 | 1. 66E-56  | 1. 43E-55  | 116. 2257 |
| RNF170        | 1. 10877  | 2. 607177 | 20. 96578 | 7. 35E-62  | 7. 25E-61  | 128. 5627 |
| SPIDR         | 1. 065701 | 4. 201286 | 15. 93182 | 2. 12E-42  | 1. 34E-41  | 83. 74784 |
| PRKDC         | 1. 506959 | 4. 379658 | 21. 22063 | 7. 80E-63  | 7. 91E-62  | 130. 8076 |
| MCM4          | 1. 98572  | 3. 076987 | 25. 66982 | 1. 97E-79  | 3. 31E-78  | 169. 0718 |
| UBE2V2        | 1. 783741 | 3. 946666 | 29. 91684 | 2. 24E-94  | 7. 04E-93  | 203. 5416 |
| SNAI2         | 1. 891862 | 2. 858006 | 17. 32754 | 8. 36E-48  | 5. 92E-47  | 96. 1851  |
| FAM150A       | 1. 176732 | 0. 702906 | 16. 60805 | 5. 15E-45  | 3. 45E-44  | 89. 7647  |
| RP11-400K9. 4 | 1. 010876 | 0. 610543 | 17. 7625  | 1. 72E-49  | 1. 26E-48  | 100. 0708 |
| ATP6V1H       | 1. 908285 | 4. 222814 | 33. 4591  | 4. 28E-106 | 2. 55E-104 | 230. 5805 |
| TCEA1         | 1. 342442 | 4. 72742  | 20. 1388  | 1. 10E-58  | 9. 96E-58  | 121. 2492 |
| LYPLA1        | 1. 620043 | 3. 962574 | 23. 71454 | 3. 04E-72  | 4. 03E-71  | 152. 4956 |
| MRPL15        | 2. 00019  | 4. 366867 | 31. 80632 | 1. 03E-100 | 4. 49E-99  | 218. 1598 |
| TMEM68        | 1. 368003 | 2. 659076 | 25. 73613 | 1. 13E-79  | 1. 92E-78  | 169. 6265 |
| TGS1          | 1. 314065 | 2. 204043 | 26. 67935 | 4. 53E-83  | 8. 65E-82  | 177. 4625 |
| LYN           | 2. 143989 | 3. 137834 | 30. 81098 | 2. 13E-97  | 7. 79E-96  | 210. 515  |
| RPS20         | 1. 306632 | 10. 2246  | 12. 96555 | 3. 85E-31  | 1. 94E-30  | 57. 86628 |
| CHCHD7        | 1. 286299 | 4. 238639 | 22. 59236 | 4. 86E-68  | 5. 69E-67  | 142. 8048 |
| SDR16C5       | 4. 055692 | 2. 077226 | 40. 94602 | 1. 09E-128 | 2. 74E-126 | 282. 7262 |
| PENK          | 1. 017545 | 0. 685279 | 11. 67979 | 1. 85E-26  | 8. 48E-26  | 47. 12188 |
| RPL37P6       | 2. 033387 | 1. 042    | 31. 96669 | 3. 06E-101 | 1. 36E-99  | 219. 3799 |
| IMPAD1        | 1. 397412 | 3. 493642 | 23. 40007 | 4. 53E-71  | 5. 79E-70  | 149. 7922 |
| FAM110B       | 1. 107856 | 1. 437664 | 20. 10242 | 1. 51E-58  | 1. 37E-57  | 120. 9265 |
| UBXN2B        | 1. 103809 | 2. 634575 | 21. 88971 | 2. 21E-65  | 2. 40E-64  | 136. 6785 |
| SDCBP         | 2. 330586 | 5. 780437 | 30. 56236 | 1. 46E-96  | 5. 10E-95  | 208. 5861 |
| RAB2A         | 1. 83871  | 5. 369108 | 26. 4376  | 3. 33E-82  | 6. 16E-81  | 175. 464  |
| ASPH          | 2. 625639 | 4. 947491 | 30. 55476 | 1. 55E-96  | 5. 40E-95  | 208. 527  |
| GGH           | 1. 530448 | 2. 892308 | 21. 33205 | 2. 93E-63  | 3. 00E-62  | 131. 7876 |
| YTHDF3        | 1. 342278 | 3. 301248 | 22. 38783 | 2. 87E-67  | 3. 29E-66  | 141. 0259 |
| ARMC1         | 1. 330757 | 2. 861791 | 25. 34996 | 2. 87E-78  | 4. 66E-77  | 166. 3888 |
| DNAJC5B       | 1. 222485 | 0. 661342 | 21. 62736 | 2. 20E-64  | 2. 32E-63  | 134. 3806 |
| ADHFE1        | -2. 06866 | 3. 073059 | -26. 8503 | 1. 11E-83  | 2. 16E-82  | 178. 8711 |
| C8orf46       | -1. 04362 | 1. 074837 | -16. 4579 | 1. 96E-44  | 1. 30E-43  | 88. 42641 |
| VCPIP1        | 1. 095761 | 1. 594466 | 25. 96451 | 1. 69E-80  | 2. 94E-79  | 171. 5333 |
| COPS5         | 1. 182314 | 4. 75406  | 19. 79893 | 2. 24E-57  | 1. 97E-56  | 118. 2322 |
| ARFGEF1       | 1. 148474 | 3. 992063 | 18. 99824 | 2. 78E-54  | 2. 27E-53  | 111. 1045 |
| SULF1         | 5. 765498 | 3. 957691 | 50. 66938 | 3. 73E-154 | 6. 65E-151 | 341. 502  |
| NCOA2         | 1. 18367  | 2. 268939 | 19. 13134 | 8. 48E-55  | 7. 04E-54  | 112. 291  |
| TRAM1         | 1. 085599 | 6. 29298  | 13. 41692 | 8. 05E-33  | 4. 21E-32  | 61. 72358 |
| LACTB2        | 1. 910615 | 3. 497662 | 25. 49359 | 8. 61E-79  | 1. 42E-77  | 167. 595  |
| XKR9          | 1. 53381  | 0. 972235 | 22. 10735 | 3. 31E-66  | 3. 67E-65  | 138. 5805 |
| MSC-AS1       | 1. 120781 | 1. 858923 | 15. 34017 | 4. 03E-40  | 2. 43E-39  | 78. 50649 |
| MSC           | 2. 116004 | 2. 463397 | 23. 70499 | 3. 30E-72  | 4. 37E-71  | 152. 4136 |
| TERF1         | 1. 212387 | 3. 035598 | 23. 16992 | 3. 29E-70  | 4. 11E-69  | 147. 8075 |
| RDH10         | 1. 387549 | 3. 436603 | 15. 98914 | 1. 27E-42  | 8. 11E-42  | 84. 25695 |
| STAU2         | 1. 479131 | 3. 080905 | 25. 19333 | 1. 07E-77  | 1. 70E-76  | 165. 0708 |
| UBE2W         | 1. 381064 | 2. 620776 | 23. 42815 | 3. 56E-71  | 4. 56E-70  | 150. 034  |
| TCEB1         | 2. 121944 | 4. 987234 | 32. 96609 | 1. 67E-104 | 9. 02E-103 | 226. 9111 |
| LY96          | 3. 004976 | 2. 653553 | 35. 07235 | 3. 30E-111 | 2. 70E-109 | 242. 3784 |

|            |          |          |          |           |           |          |
|------------|----------|----------|----------|-----------|-----------|----------|
| PI15       | 1.248363 | 0.760127 | 18.19397 | 3.64E-51  | 2.76E-50  | 103.9257 |
| CRISPLD1   | 1.872253 | 1.10446  | 24.80627 | 2.80E-76  | 4.25E-75  | 161.802  |
| CASC9      | 1.037404 | 0.581941 | 10.92456 | 8.51E-24  | 3.68E-23  | 41.01816 |
| HNF4G      | 1.058826 | 2.010327 | 13.41955 | 7.87E-33  | 4.12E-32  | 61.74621 |
| PEX2       | 1.28135  | 4.344833 | 19.38921 | 8.54E-56  | 7.23E-55  | 114.588  |
| PKIA       | 2.012282 | 1.230571 | 28.64921 | 5.14E-90  | 1.31E-88  | 193.4842 |
| ZC2HC1A    | 1.491353 | 1.942546 | 23.86571 | 8.34E-73  | 1.13E-71  | 153.7917 |
| IL7        | 1.404873 | 1.191155 | 24.36469 | 1.18E-74  | 1.70E-73  | 158.0529 |
| STMN2      | 2.512602 | 2.157735 | 23.42879 | 3.54E-71  | 4.54E-70  | 150.0395 |
| HEY1       | 1.111137 | 1.854632 | 19.74786 | 3.52E-57  | 3.09E-56  | 117.7784 |
| MRPS28     | 1.620784 | 4.442161 | 29.23212 | 4.95E-92  | 1.39E-90  | 198.1339 |
| TPD52      | 1.71307  | 4.930646 | 20.34789 | 1.72E-59  | 1.59E-58  | 123.1021 |
| FABP5      | 1.649817 | 4.897418 | 17.88948 | 5.52E-50  | 4.09E-49  | 101.2054 |
| IMPA1      | 1.219308 | 2.884586 | 19.43749 | 5.56E-56  | 4.73E-55  | 115.0178 |
| CHMP4C     | 1.148537 | 3.550634 | 15.53888 | 6.93E-41  | 4.25E-40  | 80.26391 |
| SNX16      | 1.226768 | 1.714081 | 22.57437 | 5.69E-68  | 6.63E-67  | 142.6485 |
| LRRCC1     | 1.108381 | 1.862086 | 21.43033 | 1.24E-63  | 1.28E-62  | 132.6513 |
| C8orf59    | 1.025258 | 5.881901 | 14.62024 | 2.29E-37  | 1.31E-36  | 72.17008 |
| CA13       | 1.769935 | 1.707079 | 27.93716 | 1.58E-87  | 3.54E-86  | 187.7473 |
| CA2        | 1.460115 | 4.065196 | 11.19968 | 9.30E-25  | 4.10E-24  | 43.22137 |
| WWP1       | 1.473096 | 3.70894  | 21.61221 | 2.51E-64  | 2.65E-63  | 134.2477 |
| RMDN1      | 1.170807 | 3.869901 | 20.47424 | 5.63E-60  | 5.28E-59  | 124.2206 |
| CPNE3      | 1.217891 | 3.87113  | 18.42516 | 4.61E-52  | 3.58E-51  | 105.9906 |
| RIPK2      | 1.90679  | 2.954364 | 29.9553  | 1.66E-94  | 5.26E-93  | 203.8436 |
| OSGIN2     | 1.789877 | 2.126255 | 31.72043 | 1.99E-100 | 8.49E-99  | 217.505  |
| NBN        | 1.281636 | 3.039401 | 21.34161 | 2.69E-63  | 2.76E-62  | 131.8717 |
| DECR1      | 1.396973 | 5.354903 | 23.32723 | 8.48E-71  | 1.08E-69  | 149.1646 |
| C8orf88    | 1.21623  | 1.059748 | 17.54856 | 1.16E-48  | 8.37E-48  | 98.15936 |
| TMEM55A    | 1.801826 | 2.280816 | 26.10767 | 5.13E-81  | 9.10E-80  | 172.7255 |
| OTUD6B-AS1 | 1.007372 | 2.90682  | 17.36745 | 5.86E-48  | 4.16E-47  | 96.54155 |
| TRIQQ      | 1.850554 | 2.878139 | 28.16458 | 2.51E-88  | 5.88E-87  | 189.5863 |
| PDP1       | 1.662528 | 2.674634 | 24.05506 | 1.65E-73  | 2.29E-72  | 155.4118 |
| CDH17      | 2.916919 | 1.644636 | 17.9219  | 4.13E-50  | 3.07E-49  | 101.4951 |
| GEM        | 3.571616 | 3.127666 | 31.2105  | 9.81E-99  | 3.83E-97  | 213.5985 |
| KIAA1429   | 1.482527 | 4.228926 | 26.16171 | 3.28E-81  | 5.85E-80  | 173.1749 |
| DPY19L4    | 1.282389 | 2.483156 | 21.68018 | 1.38E-64  | 1.47E-63  | 134.8437 |
| TP53INP1   | -1.31353 | 3.737135 | -15.7974 | 7.00E-42  | 4.38E-41  | 82.55473 |
| PLEKHF2    | 1.661756 | 2.688397 | 28.54591 | 1.17E-89  | 2.93E-88  | 192.6557 |
| UQCRB      | 1.206214 | 7.467542 | 16.48039 | 1.61E-44  | 1.06E-43  | 88.62717 |
| MTERF3     | 1.209599 | 3.146071 | 23.26552 | 1.44E-70  | 1.82E-69  | 148.6325 |
| PTDSS1     | 1.306643 | 4.872355 | 19.60274 | 1.28E-56  | 1.11E-55  | 116.4881 |
| CPQ        | 1.486833 | 4.077852 | 21.87117 | 2.60E-65  | 2.82E-64  | 136.5163 |
| MTDH       | 1.634136 | 4.081328 | 20.22974 | 4.90E-59  | 4.48E-58  | 122.0553 |
| LAPTM4B    | 2.275141 | 4.723082 | 28.10752 | 3.98E-88  | 9.21E-87  | 189.1255 |
| MATN2      | 2.136149 | 3.298437 | 22.87686 | 4.13E-69  | 5.00E-68  | 145.2729 |
| RPL30      | 1.257892 | 10.39335 | 12.69026 | 3.99E-30  | 1.97E-29  | 55.53352 |
| STK3       | 1.495043 | 3.023874 | 23.96533 | 3.56E-73  | 4.86E-72  | 154.6445 |
| OSR2       | 1.222907 | 1.977388 | 14.67941 | 1.36E-37  | 7.85E-37  | 72.6888  |
| COX6C      | 1.866538 | 7.18865  | 24.7236  | 5.64E-76  | 8.47E-75  | 161.1018 |
| POLR2K     | 1.926721 | 4.564217 | 31.99861 | 2.40E-101 | 1.08E-99  | 219.6223 |
| SPAG1      | 1.508323 | 1.806331 | 23.40443 | 4.36E-71  | 5.58E-70  | 149.8298 |
| PABPC1     | 2.031613 | 8.891819 | 21.82925 | 3.75E-65  | 4.05E-64  | 136.1494 |
| YWHAZ      | 3.116564 | 6.968264 | 36.58888 | 6.89E-116 | 7.59E-114 | 253.1809 |
| NCALD      | 1.384375 | 2.439772 | 19.22232 | 3.77E-55  | 3.15E-54  | 113.1016 |

|             |           |           |           |            |            |           |
|-------------|-----------|-----------|-----------|------------|------------|-----------|
| RRM2B       | 1. 255153 | 2. 497395 | 20. 12697 | 1. 22E-58  | 1. 10E-57  | 121. 1442 |
| UBR5        | 1. 063383 | 4. 594045 | 17. 00215 | 1. 53E-46  | 1. 06E-45  | 93. 2798  |
| ATP6V1C1    | 1. 519557 | 3. 595341 | 23. 17578 | 3. 13E-70  | 3. 91E-69  | 147. 8581 |
| FZD6        | 1. 286919 | 2. 863759 | 19. 53063 | 2. 43E-56  | 2. 09E-55  | 115. 8467 |
| CTHRC1      | 5. 715209 | 3. 8348   | 49. 61593 | 1. 39E-151 | 2. 11E-148 | 335. 5647 |
| SLC25A32    | 1. 442576 | 2. 658991 | 26. 24341 | 1. 66E-81  | 3. 00E-80  | 173. 8537 |
| DCAF13      | 1. 583117 | 3. 691363 | 26. 9211  | 6. 21E-84  | 1. 22E-82  | 179. 4539 |
| DCSTAMP     | 1. 286976 | 0. 713048 | 22. 25246 | 9. 34E-67  | 1. 05E-65  | 139. 8465 |
| LRP12       | 1. 108911 | 1. 649142 | 17. 26318 | 1. 49E-47  | 1. 05E-46  | 95. 61027 |
| ZFPM2       | 1. 272456 | 0. 904269 | 22. 4511  | 1. 66E-67  | 1. 91E-66  | 141. 5766 |
| ZFPM2-AS1   | 1. 539862 | 0. 826652 | 18. 50051 | 2. 35E-52  | 1. 84E-51  | 106. 6634 |
| P11-395G23. | 1. 180144 | 1. 473991 | 19. 29553 | 1. 97E-55  | 1. 65E-54  | 113. 7538 |
| OXR1        | 1. 460558 | 3. 242681 | 21. 4092  | 1. 49E-63  | 1. 54E-62  | 132. 4656 |
| TAGLN2P1    | 1. 071226 | 0. 73464  | 24. 30371 | 1. 99E-74  | 2. 84E-73  | 157. 5335 |
| EMC2        | 1. 166102 | 4. 581129 | 18. 21445 | 3. 03E-51  | 2. 31E-50  | 104. 1087 |
| NUDCD1      | 1. 144882 | 2. 609773 | 19. 27765 | 2. 30E-55  | 1. 94E-54  | 113. 5946 |
| ENY2        | 1. 693852 | 5. 606019 | 25. 9091  | 2. 68E-80  | 4. 62E-79  | 171. 0712 |
| SYBU        | -1. 75829 | 4. 465207 | -13. 6786 | 8. 42E-34  | 4. 48E-33  | 63. 97639 |
| TRPS1       | 1. 304786 | 1. 128446 | 21. 95567 | 1. 24E-65  | 1. 36E-64  | 137. 2554 |
| EIF3H       | 1. 396923 | 7. 150399 | 18. 29875 | 1. 43E-51  | 1. 10E-50  | 104. 8616 |
| RAD21       | 2. 140021 | 4. 495135 | 29. 94007 | 1. 87E-94  | 5. 89E-93  | 203. 7241 |
| MED30       | 1. 333888 | 2. 92932  | 24. 77974 | 3. 50E-76  | 5. 30E-75  | 161. 5774 |
| EXT1        | 2. 107573 | 3. 928864 | 30. 57894 | 1. 28E-96  | 4. 51E-95  | 208. 715  |
| AC113188. 2 | 1. 809921 | 2. 205117 | 22. 82437 | 6. 51E-69  | 7. 81E-68  | 144. 8181 |
| SAMD12      | 1. 420632 | 1. 525139 | 24. 79433 | 3. 10E-76  | 4. 70E-75  | 161. 701  |
| TNFRSF11B   | 2. 809536 | 1. 958898 | 24. 59007 | 1. 75E-75  | 2. 58E-74  | 159. 9691 |
| MAL2        | 3. 224483 | 5. 169719 | 36. 42423 | 2. 19E-115 | 2. 32E-113 | 252. 0214 |
| NOV         | 1. 556669 | 2. 142856 | 18. 97494 | 3. 42E-54  | 2. 79E-53  | 110. 8967 |
| ENPP2       | 1. 871769 | 3. 389479 | 15. 10002 | 3. 36E-39  | 1. 99E-38  | 76. 38712 |
| TAF2        | 1. 045795 | 2. 634456 | 16. 83791 | 6. 63E-46  | 4. 52E-45  | 91. 81428 |
| DEPTOR      | 2. 242148 | 2. 718106 | 30. 95686 | 6. 91E-98  | 2. 58E-96  | 211. 6432 |
| P11-760H22. | 1. 504304 | 1. 313302 | 27. 41403 | 1. 10E-85  | 2. 31E-84  | 183. 493  |
| COL14A1     | 3. 17602  | 3. 054815 | 25. 58654 | 3. 96E-79  | 6. 60E-78  | 168. 3743 |
| MRPL13      | 2. 061615 | 4. 013315 | 35. 87405 | 1. 07E-113 | 1. 01E-111 | 248. 1235 |
| P11-713M15. | -1. 03408 | 1. 786812 | -16. 4722 | 1. 73E-44  | 1. 14E-43  | 88. 55399 |
| HAS2        | 1. 625545 | 0. 915104 | 22. 11516 | 3. 09E-66  | 3. 43E-65  | 138. 6488 |
| HAS2-AS1    | 1. 010428 | 0. 534711 | 21. 21435 | 8. 24E-63  | 8. 35E-62  | 130. 7523 |
| ZHX2        | 1. 0872   | 3. 147578 | 18. 18126 | 4. 07E-51  | 3. 09E-50  | 103. 8121 |
| DERL1       | 1. 901774 | 4. 470089 | 28. 4615  | 2. 31E-89  | 5. 68E-88  | 191. 9779 |
| FAM83A      | 3. 466468 | 1. 720728 | 24. 13488 | 8. 37E-74  | 1. 17E-72  | 156. 0936 |
| C8orf76     | 1. 619554 | 3. 369227 | 29. 09235 | 1. 50E-91  | 4. 13E-90  | 197. 0228 |
| ATAD2       | 1. 566441 | 1. 679491 | 26. 83181 | 1. 29E-83  | 2. 51E-82  | 178. 7192 |
| WDYHV1      | 1. 188138 | 3. 141516 | 20. 89436 | 1. 38E-61  | 1. 35E-60  | 127. 9328 |
| FBX032      | 3. 166449 | 3. 67573  | 32. 47571 | 6. 56E-103 | 3. 23E-101 | 223. 2313 |
| ANXA13      | 2. 773055 | 1. 501046 | 21. 40198 | 1. 59E-63  | 1. 63E-62  | 132. 4022 |
| FAM91A1     | 1. 415949 | 3. 253087 | 22. 82475 | 6. 49E-69  | 7. 79E-68  | 144. 8214 |
| FER1L6      | 1. 546693 | 0. 858207 | 11. 62757 | 2. 84E-26  | 1. 30E-25  | 46. 69438 |
| TRMT12      | 1. 479582 | 2. 221367 | 33. 28959 | 1. 50E-105 | 8. 67E-104 | 229. 3223 |
| RNF139      | 1. 518006 | 3. 192434 | 27. 38787 | 1. 36E-85  | 2. 84E-84  | 183. 2793 |
| NDUFB9      | 1. 516121 | 6. 929672 | 20. 38385 | 1. 25E-59  | 1. 16E-58  | 123. 4205 |
| SQLE        | 2. 893367 | 3. 527568 | 30. 5303  | 1. 87E-96  | 6. 50E-95  | 208. 3368 |
| KIAA0196    | 1. 529732 | 3. 563997 | 27. 18097 | 7. 38E-85  | 1. 50E-83  | 181. 5869 |
| NSMCE2      | 1. 770808 | 3. 452937 | 31. 7555  | 1. 52E-100 | 6. 56E-99  | 217. 7725 |
| TRIB1       | 2. 008168 | 3. 740961 | 22. 79463 | 8. 42E-69  | 1. 01E-67  | 144. 5603 |

|             |           |           |           |            |            |           |
|-------------|-----------|-----------|-----------|------------|------------|-----------|
| FAM84B      | 1. 702687 | 3. 777182 | 25. 25323 | 6. 47E-78  | 1. 04E-76  | 165. 5751 |
| CCAT1       | 1. 026565 | 0. 500636 | 14. 66637 | 1. 53E-37  | 8. 80E-37  | 72. 57446 |
| CASC8       | 1. 472932 | 0. 737401 | 21. 99533 | 8. 79E-66  | 9. 65E-65  | 137. 602  |
| PVT1        | 2. 873133 | 2. 453766 | 24. 17175 | 6. 11E-74  | 8. 59E-73  | 156. 4084 |
| FAM49B      | 2. 238785 | 4. 050401 | 33. 37905 | 7. 75E-106 | 4. 55E-104 | 229. 9867 |
| ASAP1       | 1. 658384 | 2. 823835 | 22. 34152 | 4. 30E-67  | 4. 90E-66  | 140. 6226 |
| EFR3A       | 1. 666126 | 3. 411554 | 24. 6175  | 1. 38E-75  | 2. 05E-74  | 160. 2019 |
| LRRC6       | 1. 189636 | 1. 928422 | 16. 59948 | 5. 56E-45  | 3. 71E-44  | 89. 6883  |
| TMEM71      | 1. 313136 | 1. 031471 | 20. 57435 | 2. 32E-60  | 2. 21E-59  | 125. 1063 |
| SLA         | 2. 214494 | 2. 331395 | 21. 64513 | 1. 88E-64  | 1. 99E-63  | 134. 5364 |
| WISP1       | 2. 812991 | 1. 718811 | 29. 53206 | 4. 62E-93  | 1. 36E-91  | 200. 51   |
| WISP1-OT1   | 1. 298454 | 0. 790822 | 19. 24077 | 3. 20E-55  | 2. 68E-54  | 113. 2661 |
| NDRG1       | 2. 126949 | 6. 010678 | 21. 36322 | 2. 23E-63  | 2. 29E-62  | 132. 0617 |
| ST3GAL1     | 2. 042698 | 3. 386282 | 27. 45687 | 7. 77E-86  | 1. 64E-84  | 183. 8426 |
| ZFAT        | 1. 162747 | 1. 718297 | 23. 73817 | 2. 49E-72  | 3. 31E-71  | 152. 6984 |
| KHDRBS3     | 1. 528818 | 2. 645639 | 21. 62995 | 2. 15E-64  | 2. 27E-63  | 134. 4033 |
| COL22A1     | 2. 377279 | 1. 324433 | 26. 22    | 2. 02E-81  | 3. 63E-80  | 173. 6593 |
| TRAPPC9     | 1. 251982 | 3. 226389 | 11. 62164 | 2. 98E-26  | 1. 36E-25  | 46. 64592 |
| CHRA1       | 1. 760349 | 3. 534279 | 27. 85524 | 3. 06E-87  | 6. 81E-86  | 187. 0833 |
| AGO2        | 1. 195008 | 2. 227758 | 19. 20345 | 4. 46E-55  | 3. 72E-54  | 112. 9336 |
| PTK2        | 1. 563737 | 4. 517504 | 23. 42131 | 3. 77E-71  | 4. 83E-70  | 149. 9751 |
| DENND3      | 1. 432388 | 3. 347333 | 18. 34291 | 9. 61E-52  | 7. 41E-51  | 105. 256  |
| P11-809017. | 1. 348998 | 1. 025066 | 26. 13889 | 3. 96E-81  | 7. 04E-80  | 172. 9852 |
| SLC45A4     | 1. 393614 | 2. 949484 | 19. 29159 | 2. 04E-55  | 1. 71E-54  | 113. 7188 |
| JRK         | 1. 266985 | 1. 999304 | 16. 58682 | 6. 22E-45  | 4. 15E-44  | 89. 57543 |
| PSCA        | 6. 111499 | 3. 486353 | 27. 36019 | 1. 71E-85  | 3. 55E-84  | 183. 0533 |
| LY6K        | 1. 177491 | 0. 7627   | 8. 615303 | 3. 34E-16  | 1. 21E-15  | 23. 65841 |
| THEM6       | 1. 382711 | 3. 918661 | 18. 85242 | 1. 02E-53  | 8. 22E-53  | 109. 8041 |
| LYPD2       | 1. 928048 | 0. 996337 | 11. 60865 | 3. 32E-26  | 1. 51E-25  | 46. 5397  |
| LYNX1       | 1. 594327 | 2. 728436 | 11. 29738 | 4. 21E-25  | 1. 87E-24  | 44. 00954 |
| LY6D        | 3. 470556 | 2. 062313 | 16. 32588 | 6. 37E-44  | 4. 16E-43  | 87. 25136 |
| LY6E        | 4. 402209 | 6. 504721 | 37. 94468 | 5. 67E-120 | 7. 88E-118 | 262. 6074 |
| C8orf31     | 2. 061862 | 1. 332075 | 21. 1516  | 1. 43E-62  | 1. 44E-61  | 130. 2    |
| LY6H        | 1. 013448 | 0. 982882 | 15. 60651 | 3. 81E-41  | 2. 34E-40  | 80. 86277 |
| TOP1MT      | 1. 162551 | 3. 736865 | 17. 24391 | 1. 77E-47  | 1. 24E-46  | 95. 43823 |
| ZC3H3       | 1. 212798 | 2. 85795  | 18. 24308 | 2. 34E-51  | 1. 79E-50  | 104. 3644 |
| GSDMD       | 1. 500168 | 5. 357413 | 17. 8443  | 8. 27E-50  | 6. 11E-49  | 100. 8017 |
| MROH6       | 3. 780698 | 2. 83141  | 39. 64774 | 5. 66E-125 | 1. 08E-122 | 274. 1476 |
| NAPRT       | 2. 487765 | 5. 276344 | 19. 83762 | 1. 59E-57  | 1. 40E-56  | 118. 5759 |
| TSTA3       | 2. 107157 | 6. 25055  | 24. 21388 | 4. 27E-74  | 6. 03E-73  | 156. 7678 |
| ZNF623      | 1. 139727 | 2. 118983 | 20. 78573 | 3. 59E-61  | 3. 49E-60  | 126. 974  |
| ZNF707      | 1. 070812 | 2. 562514 | 20. 50586 | 4. 26E-60  | 4. 01E-59  | 124. 5005 |
| FAM83H      | 1. 993439 | 3. 614982 | 25. 4032  | 1. 84E-78  | 3. 00E-77  | 166. 8362 |
| FAM83H-AS1  | 1. 558919 | 2. 417114 | 18. 3166  | 1. 22E-51  | 9. 36E-51  | 105. 021  |
| PUF60       | 1. 885503 | 5. 577371 | 28. 62017 | 6. 48E-90  | 1. 64E-88  | 193. 2514 |
| EPPK1       | 1. 500795 | 1. 087465 | 23. 91499 | 5. 47E-73  | 7. 42E-72  | 154. 2137 |
| PLEC        | 2. 786733 | 4. 764544 | 31. 07905 | 2. 69E-98  | 1. 03E-96  | 212. 5862 |
| PARP10      | 1. 235167 | 4. 435989 | 15. 45553 | 1. 45E-40  | 8. 84E-40  | 79. 52641 |
| GRINA       | 1. 849181 | 6. 296433 | 24. 26967 | 2. 66E-74  | 3. 77E-73  | 157. 2435 |
| EXOSC4      | 1. 947302 | 3. 875828 | 29. 13194 | 1. 10E-91  | 3. 03E-90  | 197. 3377 |
| CYC1        | 1. 082887 | 5. 879061 | 15. 53729 | 7. 03E-41  | 4. 31E-40  | 80. 24984 |
| SHARPIN     | 1. 549639 | 5. 150985 | 22. 68713 | 2. 14E-68  | 2. 53E-67  | 143. 6278 |
| MAF1        | 1. 509241 | 5. 705214 | 22. 86005 | 4. 78E-69  | 5. 77E-68  | 145. 1273 |
| HGH1        | 1. 15175  | 3. 46421  | 22. 05721 | 5. 12E-66  | 5. 66E-65  | 138. 1427 |

|            |           |           |           |            |            |           |
|------------|-----------|-----------|-----------|------------|------------|-----------|
| DGAT1      | 1. 745224 | 4. 723033 | 23. 57589 | 1. 00E-71  | 1. 30E-70  | 151. 3049 |
| SLC52A2    | 1. 958907 | 4. 714201 | 28. 64563 | 5. 28E-90  | 1. 35E-88  | 193. 4555 |
| SLC39A4    | 2. 911312 | 4. 842553 | 28. 3086  | 7. 89E-89  | 1. 89E-87  | 190. 7477 |
| VPS28      | 1. 503624 | 6. 810425 | 20. 11717 | 1. 33E-58  | 1. 20E-57  | 121. 0573 |
| TONSL      | 1. 252778 | 1. 425693 | 21. 40959 | 1. 48E-63  | 1. 53E-62  | 132. 4691 |
| RECQL4     | 1. 712299 | 2. 322159 | 22. 14016 | 2. 48E-66  | 2. 77E-65  | 138. 867  |
| RPL8       | 1. 194181 | 10. 87751 | 11. 16894 | 1. 19E-24  | 5. 25E-24  | 42. 97398 |
| COMMD5     | 1. 822356 | 3. 811881 | 34. 24268 | 1. 35E-108 | 9. 36E-107 | 236. 3508 |
| ZNF250     | 1. 090041 | 2. 065268 | 21. 11909 | 1. 90E-62  | 1. 91E-61  | 129. 9137 |
| C8orf33    | 1. 08412  | 3. 818819 | 18. 82606 | 1. 29E-53  | 1. 04E-52  | 109. 5689 |
| DOCK8      | 1. 378445 | 2. 006238 | 18. 26593 | 1. 91E-51  | 1. 46E-50  | 104. 5685 |
| SMARCA2    | 1. 282637 | 4. 542093 | 19. 25785 | 2. 75E-55  | 2. 30E-54  | 113. 4182 |
| SLC1A1     | 2. 645889 | 2. 117422 | 27. 57278 | 3. 03E-86  | 6. 48E-85  | 184. 7875 |
| JAK2       | 1. 206542 | 1. 858571 | 19. 72398 | 4. 35E-57  | 3. 81E-56  | 117. 5661 |
| PLGRKT     | 1. 835162 | 3. 363657 | 34. 16413 | 2. 40E-108 | 1. 63E-106 | 235. 7758 |
| PDCD1LG2   | 1. 054444 | 0. 638166 | 20. 65253 | 1. 16E-60  | 1. 12E-59  | 125. 7974 |
| ERMP1      | 1. 421499 | 2. 577173 | 23. 63686 | 5. 92E-72  | 7. 75E-71  | 151. 8287 |
| IL33       | 1. 645828 | 1. 918717 | 15. 64818 | 2. 63E-41  | 1. 63E-40  | 81. 23192 |
| SNRPEP2    | 1. 785518 | 1. 898668 | 25. 3427  | 3. 05E-78  | 4. 95E-77  | 166. 3278 |
| TMEM261    | 1. 161218 | 4. 072495 | 18. 63214 | 7. 27E-53  | 5. 74E-52  | 107. 8384 |
| LURAP1L    | 1. 409304 | 3. 303101 | 20. 81757 | 2. 71E-61  | 2. 64E-60  | 127. 2551 |
| TTC39B     | 1. 099468 | 1. 599379 | 20. 69612 | 7. 92E-61  | 7. 63E-60  | 126. 1826 |
| PSIP1      | 1. 227052 | 3. 551142 | 19. 08871 | 1. 24E-54  | 1. 02E-53  | 111. 911  |
| BNC2       | 1. 20459  | 0. 834476 | 20. 11803 | 1. 32E-58  | 1. 19E-57  | 121. 0649 |
| ADAMTSL1   | 1. 152256 | 0. 891062 | 20. 19813 | 6. 48E-59  | 5. 91E-58  | 121. 7752 |
| RRAGA      | 1. 57723  | 4. 916456 | 24. 70247 | 6. 74E-76  | 1. 01E-74  | 160. 9226 |
| PLIN2      | 1. 879455 | 4. 158818 | 18. 50595 | 2. 24E-52  | 1. 75E-51  | 106. 7119 |
| MLLT3      | 2. 302082 | 2. 39203  | 34. 909   | 1. 07E-110 | 8. 45E-109 | 241. 1983 |
| HACD4      | 1. 041294 | 0. 778201 | 23. 50588 | 1. 82E-71  | 2. 35E-70  | 150. 7029 |
| IFNWP19    | 1. 280413 | 0. 644685 | 15. 51448 | 8. 60E-41  | 5. 26E-40  | 80. 04795 |
| MIR31HG    | 1. 246707 | 0. 628389 | 15. 79388 | 7. 22E-42  | 4. 52E-41  | 82. 52366 |
| CDKN2A     | 2. 804011 | 2. 01586  | 17. 79601 | 1. 27E-49  | 9. 37E-49  | 100. 3703 |
| CDKN2B     | 2. 895366 | 2. 110045 | 29. 9203  | 2. 18E-94  | 6. 86E-93  | 203. 5688 |
| PLAA       | 1. 146728 | 2. 805485 | 19. 62308 | 1. 07E-56  | 9. 25E-56  | 116. 669  |
| TEK        | 1. 108872 | 1. 501092 | 16. 20175 | 1. 92E-43  | 1. 24E-42  | 86. 14683 |
| MOB3B      | 1. 21484  | 1. 776606 | 22. 25331 | 9. 27E-67  | 1. 05E-65  | 139. 8539 |
| DDX58      | 1. 431196 | 2. 304629 | 22. 34266 | 4. 26E-67  | 4. 85E-66  | 140. 6325 |
| TOPORS     | 1. 025799 | 2. 248794 | 18. 81022 | 1. 48E-53  | 1. 19E-52  | 109. 4276 |
| TOPORS-AS1 | 1. 007927 | 2. 941392 | 19. 21131 | 4. 16E-55  | 3. 47E-54  | 113. 0036 |
| NDUFB6     | 1. 94471  | 4. 455868 | 34. 47126 | 2. 56E-109 | 1. 86E-107 | 238. 0198 |
| DNAJA1     | 1. 733601 | 5. 251626 | 21. 05242 | 3. 43E-62  | 3. 41E-61  | 129. 3264 |
| SMU1       | 1. 378294 | 2. 627568 | 29. 59853 | 2. 74E-93  | 8. 15E-92  | 201. 035  |
| B4GALT1    | 2. 156825 | 4. 746696 | 22. 93054 | 2. 60E-69  | 3. 15E-68  | 145. 7378 |
| SPINK4     | 2. 63657  | 1. 462546 | 13. 39602 | 9. 64E-33  | 5. 03E-32  | 61. 54417 |
| BAG1       | 1. 312975 | 5. 480819 | 16. 68557 | 2. 58E-45  | 1. 74E-44  | 90. 45566 |
| CHMP5      | 2. 18957  | 4. 843058 | 32. 08619 | 1. 24E-101 | 5. 63E-100 | 220. 287  |
| AQP3       | 1. 190473 | 4. 666536 | 10. 37547 | 6. 56E-22  | 2. 72E-21  | 36. 69713 |
| ANXA2P2    | 3. 866082 | 2. 995919 | 51. 77516 | 8. 26E-157 | 1. 85E-153 | 347. 6315 |
| PTENP1     | 1. 58757  | 1. 205289 | 37. 68428 | 3. 39E-119 | 4. 54E-117 | 260. 8136 |
| LINC01251  | -1. 74008 | 1. 157978 | -25. 0665 | 3. 11E-77  | 4. 87E-76  | 164. 0018 |
| PRSS3      | -4. 61451 | 8. 994363 | -26. 3891 | 4. 98E-82  | 9. 16E-81  | 175. 0625 |
| DCAF12     | 1. 474284 | 3. 369651 | 25. 1309  | 1. 81E-77  | 2. 86E-76  | 164. 5446 |
| UBAP1      | 1. 775393 | 4. 153576 | 26. 52576 | 1. 61E-82  | 3. 01E-81  | 176. 1936 |
| RPP25L     | 1. 432903 | 3. 940465 | 22. 70841 | 1. 78E-68  | 2. 11E-67  | 143. 8124 |



|               |           |           |           |            |            |           |
|---------------|-----------|-----------|-----------|------------|------------|-----------|
| DCTN3         | 1. 116227 | 5. 480074 | 17. 96187 | 2. 89E-50  | 2. 15E-49  | 101. 8521 |
| SIGMAR1       | 1. 045412 | 4. 779232 | 16. 2464  | 1. 29E-43  | 8. 38E-43  | 86. 54406 |
| P11-195F19.   | 1. 655193 | 2. 493781 | 23. 49201 | 2. 05E-71  | 2. 65E-70  | 150. 5836 |
| CCL19         | 3. 917419 | 2. 884615 | 19. 9327  | 6. 82E-58  | 6. 08E-57  | 119. 4203 |
| CCL21         | 2. 963597 | 3. 618887 | 16. 42909 | 2. 54E-44  | 1. 67E-43  | 88. 17024 |
| DNAJB5        | 1. 71225  | 2. 027823 | 21. 97513 | 1. 05E-65  | 1. 15E-64  | 137. 4255 |
| VCP           | 1. 670446 | 6. 083491 | 22. 47467 | 1. 35E-67  | 1. 56E-66  | 141. 7816 |
| STOML2        | 1. 33023  | 5. 468763 | 19. 68557 | 6. 12E-57  | 5. 34E-56  | 117. 2246 |
| FAM214B       | 2. 501592 | 3. 034771 | 34. 40525 | 4. 13E-109 | 2. 95E-107 | 237. 5385 |
| TESK1         | 1. 063899 | 4. 157576 | 14. 15748 | 1. 31E-35  | 7. 24E-35  | 68. 12811 |
| CD72          | 1. 279338 | 2. 100115 | 15. 04114 | 5. 65E-39  | 3. 34E-38  | 75. 86831 |
| SIT1          | 1. 501025 | 0. 915644 | 18. 14073 | 5. 85E-51  | 4. 42E-50  | 103. 4501 |
| CA9           | 3. 614282 | 3. 446684 | 17. 97935 | 2. 47E-50  | 1. 85E-49  | 102. 0083 |
| TPM2          | 3. 03918  | 6. 461778 | 27. 5903  | 2. 62E-86  | 5. 63E-85  | 184. 9302 |
| TLN1          | 1. 794062 | 5. 922183 | 20. 26861 | 3. 47E-59  | 3. 19E-58  | 122. 3999 |
| CREB3         | 1. 397425 | 4. 656752 | 18. 74475 | 2. 66E-53  | 2. 12E-52  | 108. 8434 |
| NPR2          | 1. 158657 | 2. 724721 | 16. 02391 | 9. 35E-43  | 5. 96E-42  | 84. 56585 |
| HRCT1         | 1. 184593 | 1. 151593 | 15. 25448 | 8. 59E-40  | 5. 16E-39  | 77. 74972 |
| YBX1P10       | 1. 137117 | 1. 051541 | 29. 67527 | 1. 50E-93  | 4. 50E-92  | 201. 6405 |
| RECK          | 1. 29334  | 1. 583344 | 19. 61403 | 1. 16E-56  | 1. 00E-55  | 116. 5885 |
| GLIPR2        | 2. 849333 | 2. 743392 | 32. 92771 | 2. 22E-104 | 1. 19E-102 | 226. 6242 |
| CLTA          | 1. 468046 | 6. 624016 | 18. 81686 | 1. 40E-53  | 1. 12E-52  | 109. 4868 |
| GNE           | 1. 865962 | 2. 548029 | 26. 16774 | 3. 12E-81  | 5. 56E-80  | 173. 2251 |
| MELK          | 2. 260716 | 1. 27147  | 34. 46796 | 2. 62E-109 | 1. 90E-107 | 237. 9958 |
| GRHPR         | 1. 178882 | 5. 450326 | 19. 09736 | 1. 15E-54  | 9. 49E-54  | 111. 9881 |
| TOMM5         | 1. 162222 | 5. 591309 | 17. 73377 | 2. 22E-49  | 1. 63E-48  | 99. 81414 |
| EXOSC3        | 1. 49876  | 3. 368774 | 26. 37989 | 5. 37E-82  | 9. 86E-81  | 174. 9859 |
| SHB           | 1. 673023 | 3. 782355 | 24. 42187 | 7. 28E-75  | 1. 05E-73  | 158. 5396 |
| ALDH1B1       | 2. 117984 | 3. 036605 | 28. 60803 | 7. 14E-90  | 1. 80E-88  | 193. 154  |
| FAM95C        | -1. 14458 | 2. 611694 | -13. 047  | 1. 92E-31  | 9. 75E-31  | 58. 55966 |
| FAM95B1       | -1. 5717  | 1. 928265 | -20. 1489 | 1. 00E-58  | 9. 12E-58  | 121. 339  |
| TJP2          | 1. 484688 | 4. 253143 | 19. 34725 | 1. 24E-55  | 1. 05E-54  | 114. 2144 |
| TMEM2         | 2. 201031 | 4. 411187 | 28. 59158 | 8. 14E-90  | 2. 05E-88  | 193. 0222 |
| ABHD17B       | 1. 163625 | 2. 239338 | 22. 4307  | 1. 98E-67  | 2. 28E-66  | 141. 3991 |
| HSPB1P1       | 2. 724604 | 1. 464321 | 33. 66943 | 9. 06E-107 | 5. 60E-105 | 232. 1368 |
| GDA           | 2. 889005 | 2. 003704 | 29. 97673 | 1. 40E-94  | 4. 46E-93  | 204. 0119 |
| LINC01504     | 1. 428041 | 0. 83348  | 26. 94442 | 5. 13E-84  | 1. 01E-82  | 179. 6457 |
| ZFAND5        | 1. 148206 | 5. 722312 | 12. 63069 | 6. 61E-30  | 3. 25E-29  | 55. 03087 |
| ANXA1         | 4. 315425 | 5. 686281 | 35. 88877 | 9. 64E-114 | 9. 21E-112 | 248. 2282 |
| OSTF1         | 2. 37294  | 4. 129654 | 38. 46467 | 1. 63E-121 | 2. 53E-119 | 266. 1661 |
| PCSK5         | 1. 768708 | 1. 765232 | 25. 7809  | 7. 80E-80  | 1. 33E-78  | 170. 0008 |
| RFK           | 1. 667327 | 3. 272562 | 26. 8593  | 1. 03E-83  | 2. 01E-82  | 178. 9455 |
| GCNT1         | 2. 221483 | 1. 672382 | 27. 189   | 6. 92E-85  | 1. 40E-83  | 181. 6527 |
| PRUNE2        | 1. 288416 | 1. 757684 | 13. 30198 | 2. 16E-32  | 1. 12E-31  | 60. 73776 |
| GNAQ          | 1. 872255 | 3. 151814 | 31. 71372 | 2. 09E-100 | 8. 93E-99  | 217. 4538 |
| PSAT1         | -2. 06336 | 3. 52827  | -19. 6278 | 1. 02E-56  | 8. 88E-56  | 116. 711  |
| TLE4          | 1. 120104 | 2. 525409 | 17. 92148 | 4. 15E-50  | 3. 08E-49  | 101. 4913 |
| RP11-79D8. 2  | 1. 176468 | 2. 172095 | 13. 64946 | 1. 08E-33  | 5. 76E-33  | 63. 72523 |
| UBQLN1        | 1. 351386 | 4. 569118 | 21. 015   | 4. 76E-62  | 4. 72E-61  | 128. 9966 |
| C9orf64       | 1. 642576 | 2. 368569 | 31. 72556 | 1. 91E-100 | 8. 18E-99  | 217. 5441 |
| HNRNPK        | 1. 540563 | 7. 235894 | 19. 45323 | 4. 83E-56  | 4. 12E-55  | 115. 1579 |
| RP11-575L7. 8 | -1. 05457 | 1. 732944 | -14. 3617 | 2. 21E-36  | 1. 24E-35  | 69. 90867 |
| GOLM1         | 3. 134201 | 5. 418614 | 33. 9378  | 1. 26E-107 | 8. 17E-106 | 234. 1147 |
| ISCA1         | 1. 100815 | 3. 644169 | 20. 09255 | 1. 65E-58  | 1. 49E-57  | 120. 8389 |

|               |           |           |           |            |            |           |
|---------------|-----------|-----------|-----------|------------|------------|-----------|
| ZCCHC6        | 1. 202498 | 3. 024164 | 22. 73742 | 1. 38E-68  | 1. 64E-67  | 144. 0641 |
| RP11-40C6. 2  | 8. 436998 | 4. 774238 | 89. 55651 | 2. 59E-227 | 1. 57E-222 | 510. 3652 |
| CTSL          | 2. 043704 | 5. 656504 | 24. 00001 | 2. 65E-73  | 3. 64E-72  | 154. 9411 |
| SPIN1         | 1. 465376 | 3. 980522 | 20. 51995 | 3. 76E-60  | 3. 54E-59  | 124. 6251 |
| SIPR3         | 1. 627221 | 2. 126854 | 21. 62654 | 2. 21E-64  | 2. 34E-63  | 134. 3734 |
| RP11-82L18. 2 | -1. 4572  | 2. 0736   | -15. 0338 | 6. 03E-39  | 3. 56E-38  | 75. 80337 |
| CKS2          | 4. 037861 | 3. 246804 | 51. 32461 | 9. 85E-156 | 1. 92E-152 | 345. 1466 |
| SEMA4D        | 1. 40889  | 3. 237455 | 20. 88753 | 1. 46E-61  | 1. 43E-60  | 127. 8725 |
| SYK           | 1. 822795 | 2. 986392 | 30. 19901 | 2. 47E-95  | 8. 13E-94  | 205. 7531 |
| NFIL3         | 1. 444585 | 3. 697173 | 15. 09836 | 3. 41E-39  | 2. 02E-38  | 76. 37254 |
| ROR2          | 2. 006048 | 1. 710652 | 26. 89154 | 7. 92E-84  | 1. 55E-82  | 179. 2108 |
| SPTLC1        | 1. 681348 | 4. 260873 | 23. 02982 | 1. 10E-69  | 1. 35E-68  | 146. 5968 |
| OGN           | 1. 652682 | 1. 779173 | 12. 71672 | 3. 19E-30  | 1. 58E-29  | 55. 75704 |
| OMD           | 1. 718081 | 1. 284036 | 17. 71405 | 2. 65E-49  | 1. 94E-48  | 99. 63795 |
| ASPN          | 4. 03255  | 3. 218105 | 35. 98878 | 4. 74E-114 | 4. 67E-112 | 248. 9393 |
| ECM2          | 2. 092624 | 1. 764129 | 25. 2407  | 7. 19E-78  | 1. 15E-76  | 165. 4697 |
| IPPK          | 1. 011107 | 2. 13208  | 22. 10951 | 3. 25E-66  | 3. 61E-65  | 138. 5994 |
| BICD2         | 1. 416596 | 2. 536147 | 23. 70026 | 3. 44E-72  | 4. 54E-71  | 152. 3731 |
| SUSD3         | 1. 743341 | 1. 326247 | 25. 1104  | 2. 15E-77  | 3. 39E-76  | 164. 3718 |
| C9orf89       | 2. 482215 | 4. 042995 | 33. 42843 | 5. 37E-106 | 3. 19E-104 | 230. 3531 |
| NINJ1         | 1. 814857 | 4. 650984 | 27. 63967 | 1. 76E-86  | 3. 81E-85  | 185. 332  |
| WNK2          | -1. 68853 | 4. 109155 | -14. 6955 | 1. 18E-37  | 6. 83E-37  | 72. 82978 |
| FAM120AOS     | 1. 337698 | 4. 363708 | 21. 98561 | 9. 57E-66  | 1. 05E-64  | 137. 5171 |
| FAM120A       | 1. 486964 | 4. 914399 | 22. 44697 | 1. 72E-67  | 1. 98E-66  | 141. 5407 |
| HIATL1        | 1. 924729 | 3. 715929 | 32. 45865 | 7. 46E-103 | 3. 66E-101 | 223. 1028 |
| FBP1          | 2. 148435 | 4. 827552 | 25. 4752  | 1. 00E-78  | 1. 65E-77  | 167. 4407 |
| SLC35D2       | 1. 248984 | 4. 60099  | 19. 39683 | 7. 98E-56  | 6. 77E-55  | 114. 6558 |
| HABP4         | 1. 574502 | 2. 604599 | 28. 76401 | 2. 05E-90  | 5. 33E-89  | 194. 4032 |
| AAED1         | 1. 365781 | 2. 265242 | 25. 10957 | 2. 17E-77  | 3. 41E-76  | 164. 3648 |
| CTSV          | 1. 621237 | 1. 626679 | 16. 51547 | 1. 18E-44  | 7. 79E-44  | 88. 93963 |
| TDRD7         | 1. 274314 | 2. 424738 | 23. 66675 | 4. 58E-72  | 6. 03E-71  | 152. 0855 |
| ANP32B        | 1. 136459 | 6. 34595  | 15. 15843 | 2. 01E-39  | 1. 20E-38  | 76. 90219 |
| NANS          | 1. 429244 | 5. 288798 | 21. 14038 | 1. 58E-62  | 1. 59E-61  | 130. 1012 |
| TRIM14        | 2. 809543 | 2. 327101 | 45. 48455 | 4. 50E-141 | 3. 20E-138 | 311. 3079 |
| CORO2A        | 3. 565249 | 1. 932081 | 47. 76495 | 5. 86E-147 | 6. 33E-144 | 324. 8931 |
| TBC1D2        | 2. 899339 | 2. 441259 | 40. 88314 | 1. 64E-128 | 4. 05E-126 | 282. 315  |
| GALNT12       | 1. 878514 | 3. 348624 | 22. 45124 | 1. 66E-67  | 1. 91E-66  | 141. 5778 |
| COL15A1       | 2. 232007 | 3. 76472  | 22. 21452 | 1. 30E-66  | 1. 46E-65  | 139. 5157 |
| RP11-92C4. 6  | 1. 131775 | 1. 141009 | 15. 64423 | 2. 72E-41  | 1. 68E-40  | 81. 19695 |
| TGFBR1        | 2. 268226 | 2. 94345  | 29. 94677 | 1. 77E-94  | 5. 61E-93  | 203. 7767 |
| NR4A3         | 1. 15175  | 1. 21427  | 10. 59594 | 1. 16E-22  | 4. 90E-22  | 38. 41938 |
| ERP44         | 1. 003352 | 3. 82103  | 20. 56165 | 2. 60E-60  | 2. 46E-59  | 124. 9939 |
| TEX10         | 1. 096476 | 2. 639425 | 21. 54434 | 4. 55E-64  | 4. 77E-63  | 133. 6523 |
| MSANTD3       | 1. 70473  | 3. 181527 | 30. 63674 | 8. 20E-97  | 2. 91E-95  | 209. 164  |
| SANTD3-TMEFF  | 1. 062935 | 0. 794161 | 26. 32187 | 8. 69E-82  | 1. 58E-80  | 174. 5049 |
| BAAT          | 1. 017006 | 0. 918037 | 12. 07416 | 7. 07E-28  | 3. 34E-27  | 50. 37444 |
| MRPL50        | 1. 092094 | 2. 66631  | 22. 33659 | 4. 49E-67  | 5. 11E-66  | 140. 5797 |
| ALDOB         | -1. 70289 | 4. 811504 | -7. 71558 | 1. 57E-13  | 5. 37E-13  | 17. 57084 |
| TMEM246       | 1. 010217 | 2. 805758 | 14. 31544 | 3. 31E-36  | 1. 84E-35  | 69. 50473 |
| RNF20         | 1. 14489  | 3. 257723 | 21. 10239 | 2. 21E-62  | 2. 21E-61  | 129. 7667 |
| SMC2          | 1. 399309 | 1. 519617 | 28. 45678 | 2. 40E-89  | 5. 89E-88  | 191. 94   |
| NIPSNAP3A     | 1. 514709 | 3. 345072 | 26. 31528 | 9. 18E-82  | 1. 67E-80  | 174. 4502 |
| SLC44A1       | 2. 221838 | 3. 398608 | 31. 72889 | 1. 86E-100 | 7. 98E-99  | 217. 5695 |
| ZNF462        | 1. 321718 | 1. 341361 | 25. 46558 | 1. 09E-78  | 1. 79E-77  | 167. 36   |

|             |           |           |           |            |            |           |
|-------------|-----------|-----------|-----------|------------|------------|-----------|
| RAD23B      | 1. 303714 | 4. 822355 | 18. 63293 | 7. 22E-53  | 5. 70E-52  | 107. 8455 |
| KLF4        | 2. 807479 | 3. 376669 | 30. 03858 | 8. 64E-95  | 2. 78E-93  | 204. 497  |
| CTNNAL1     | 1. 424584 | 3. 738847 | 20. 23907 | 4. 51E-59  | 4. 13E-58  | 122. 1381 |
| EPB41L4B    | -2. 4152  | 4. 475628 | -22. 5992 | 4. 58E-68  | 5. 37E-67  | 142. 864  |
| PALM2-AKAP2 | 1. 072762 | 0. 631162 | 17. 57581 | 9. 10E-49  | 6. 57E-48  | 98. 40281 |
| AKAP2       | 2. 365535 | 2. 841136 | 27. 27241 | 3. 50E-85  | 7. 18E-84  | 182. 3356 |
| C9orf152    | 1. 750419 | 2. 248543 | 16. 29943 | 8. 06E-44  | 5. 25E-43  | 87. 01588 |
| TXN         | 2. 675561 | 6. 73552  | 33. 36613 | 8. 52E-106 | 4. 99E-104 | 229. 8908 |
| LPAR1       | 1. 248978 | 2. 16242  | 16. 80914 | 8. 56E-46  | 5. 82E-45  | 91. 55767 |
| PTGR1       | 2. 146337 | 4. 173532 | 27. 00035 | 3. 24E-84  | 6. 44E-83  | 180. 1053 |
| NAJC25-GNG1 | 1. 665662 | 2. 344308 | 27. 40274 | 1. 21E-85  | 2. 53E-84  | 183. 4008 |
| GNG10       | 2. 467345 | 4. 182478 | 37. 89692 | 7. 86E-120 | 1. 08E-117 | 262. 279  |
| UGCG        | 1. 883532 | 3. 600588 | 25. 14904 | 1. 55E-77  | 2. 46E-76  | 164. 6976 |
| SUSD1       | 1. 913091 | 2. 371809 | 31. 32709 | 4. 01E-99  | 1. 59E-97  | 214. 4945 |
| PTBP3       | 2. 339012 | 3. 454605 | 35. 69747 | 3. 76E-113 | 3. 43E-111 | 246. 8647 |
| INIP        | 1. 285557 | 2. 28427  | 26. 31914 | 8. 89E-82  | 1. 62E-80  | 174. 4822 |
| FKBP15      | 1. 224274 | 3. 242035 | 22. 71747 | 1. 64E-68  | 1. 95E-67  | 143. 891  |
| SLC31A1     | 1. 210292 | 2. 859304 | 22. 73987 | 1. 35E-68  | 1. 61E-67  | 144. 0854 |
| CDC26       | 1. 635558 | 4. 336754 | 28. 1628  | 2. 55E-88  | 5. 95E-87  | 189. 572  |
| PRPF4       | 1. 235255 | 3. 135751 | 21. 16466 | 1. 28E-62  | 1. 29E-61  | 130. 315  |
| RNF183      | 1. 902359 | 1. 182782 | 23. 07785 | 7. 28E-70  | 8. 99E-69  | 147. 0121 |
| POLE3       | 1. 420233 | 4. 178357 | 23. 4808  | 2. 26E-71  | 2. 91E-70  | 150. 4872 |
| RGS3        | 2. 13186  | 4. 622704 | 29. 94572 | 1. 79E-94  | 5. 65E-93  | 203. 7684 |
| AMBP        | -1. 10127 | 4. 588866 | -5. 7759  | 1. 83E-08  | 5. 28E-08  | 6. 116169 |
| AKNA        | 1. 498231 | 2. 993208 | 17. 26708 | 1. 44E-47  | 1. 01E-46  | 95. 64511 |
| ATP6V1G1    | 2. 080597 | 5. 744469 | 31. 1284  | 1. 84E-98  | 7. 10E-97  | 212. 9665 |
| TNFSF15     | 1. 045156 | 0. 582981 | 22. 94288 | 2. 34E-69  | 2. 84E-68  | 145. 8446 |
| TNFSF8      | 1. 148981 | 0. 780711 | 16. 21079 | 1. 77E-43  | 1. 15E-42  | 86. 22726 |
| TNC         | 3. 404103 | 2. 436792 | 28. 7261  | 2. 78E-90  | 7. 18E-89  | 194. 0999 |
| TRIM32      | 1. 189818 | 2. 122521 | 25. 55794 | 5. 02E-79  | 8. 34E-78  | 168. 1346 |
| RPL10P3     | 1. 195323 | 0. 653201 | 28. 16478 | 2. 51E-88  | 5. 87E-87  | 189. 5879 |
| TLR4        | 1. 558607 | 1. 425647 | 23. 03259 | 1. 08E-69  | 1. 32E-68  | 146. 6208 |
| CDK5RAP2    | 1. 258825 | 3. 477734 | 23. 57312 | 1. 02E-71  | 1. 33E-70  | 151. 2811 |
| MEGF9       | 1. 178883 | 1. 859004 | 22. 00189 | 8. 30E-66  | 9. 12E-65  | 137. 6594 |
| FBXW2       | 1. 057017 | 3. 391228 | 17. 14535 | 4. 26E-47  | 2. 97E-46  | 94. 55812 |
| PHF19       | 2. 442202 | 2. 907406 | 37. 69378 | 3. 18E-119 | 4. 26E-117 | 260. 8792 |
| TRAF1       | 1. 05423  | 1. 928489 | 15. 86909 | 3. 70E-42  | 2. 33E-41  | 83. 191   |
| C5          | -1. 74819 | 2. 166543 | -22. 9078 | 3. 16E-69  | 3. 83E-68  | 145. 5411 |
| RAB14       | 1. 688543 | 4. 209178 | 28. 17913 | 2. 24E-88  | 5. 24E-87  | 189. 7038 |
| GSN         | 3. 119463 | 7. 076991 | 32. 40434 | 1. 12E-102 | 5. 43E-101 | 222. 6932 |
| STOM        | 2. 474384 | 4. 817434 | 28. 30538 | 8. 09E-89  | 1. 94E-87  | 190. 7218 |
| GGTA1P      | 1. 847128 | 1. 524915 | 23. 59413 | 8. 55E-72  | 1. 11E-70  | 151. 4616 |
| DAB2IP      | 1. 376607 | 3. 574253 | 19. 37657 | 9. 55E-56  | 8. 08E-55  | 114. 4755 |
| NDUFA8      | 1. 919589 | 4. 752478 | 33. 42145 | 5. 66E-106 | 3. 35E-104 | 230. 3014 |
| RBM18       | 1. 498181 | 2. 402636 | 29. 24086 | 4. 62E-92  | 1. 30E-90  | 198. 2032 |
| PTGS1       | 2. 058956 | 1. 778408 | 28. 46179 | 2. 30E-89  | 5. 67E-88  | 191. 9802 |
| PDCL        | 1. 548871 | 2. 380011 | 31. 72122 | 1. 98E-100 | 8. 45E-99  | 217. 511  |
| RC3H2       | 1. 467715 | 2. 499073 | 29. 59185 | 2. 89E-93  | 8. 58E-92  | 200. 9823 |
| ZBTB6       | 1. 04793  | 1. 590555 | 24. 18261 | 5. 57E-74  | 7. 85E-73  | 156. 501  |
| DENND1A     | 1. 66092  | 2. 390759 | 32. 75881 | 7. 84E-104 | 4. 11E-102 | 225. 3593 |
| NEK6        | 2. 079934 | 3. 768494 | 30. 75951 | 3. 17E-97  | 1. 14E-95  | 210. 1163 |
| PSMB7       | 1. 367432 | 6. 319986 | 20. 24084 | 4. 44E-59  | 4. 07E-58  | 122. 1537 |
| OLFML2A     | 1. 403281 | 1. 938198 | 20. 61553 | 1. 61E-60  | 1. 54E-59  | 125. 4703 |
| ARPC5L      | 2. 087331 | 4. 544596 | 32. 97094 | 1. 61E-104 | 8. 71E-103 | 226. 9473 |

|             |           |           |           |            |            |           |
|-------------|-----------|-----------|-----------|------------|------------|-----------|
| RABEPK      | 1. 364045 | 3. 235216 | 28. 58555 | 8. 55E-90  | 2. 15E-88  | 192. 9738 |
| HSPA5       | 1. 338026 | 6. 983136 | 15. 25524 | 8. 53E-40  | 5. 12E-39  | 77. 75644 |
| MAPKAP1     | 1. 40491  | 4. 76756  | 24. 42679 | 6. 98E-75  | 1. 01E-73  | 158. 5815 |
| ANGPTL2     | 3. 26186  | 2. 998131 | 34. 44811 | 3. 03E-109 | 2. 19E-107 | 237. 8511 |
| LRSAM1      | 1. 191857 | 2. 860969 | 20. 37254 | 1. 38E-59  | 1. 29E-58  | 123. 3204 |
| FAM129B     | 1. 305532 | 6. 328181 | 14. 35713 | 2. 30E-36  | 1. 29E-35  | 69. 86856 |
| SH2D3C      | 1. 330318 | 2. 152853 | 18. 15314 | 5. 24E-51  | 3. 96E-50  | 103. 561  |
| FPGS        | 1. 138454 | 4. 828169 | 16. 48677 | 1. 52E-44  | 1. 00E-43  | 88. 68395 |
| ENG         | 1. 822105 | 5. 213725 | 23. 70844 | 3. 21E-72  | 4. 24E-71  | 152. 4433 |
| AK1         | 2. 362879 | 5. 080742 | 29. 86179 | 3. 45E-94  | 1. 08E-92  | 203. 109  |
| FAM102A     | 2. 143604 | 4. 842149 | 25. 01369 | 4. 86E-77  | 7. 53E-76  | 163. 5558 |
| NAIF1       | 1. 381116 | 2. 315196 | 32. 92181 | 2. 32E-104 | 1. 24E-102 | 226. 58   |
| PTGES2      | 1. 102505 | 5. 221833 | 16. 47113 | 1. 75E-44  | 1. 15E-43  | 88. 54465 |
| LCN2        | 6. 185964 | 6. 896062 | 31. 98363 | 2. 69E-101 | 1. 20E-99  | 219. 5086 |
| C9orf16     | 1. 649524 | 5. 942406 | 17. 74384 | 2. 03E-49  | 1. 49E-48  | 99. 90412 |
| SWI5        | 1. 711346 | 3. 948382 | 29. 21125 | 5. 85E-92  | 1. 64E-90  | 197. 9681 |
| TRUB2       | 1. 360131 | 3. 383525 | 25. 31439 | 3. 87E-78  | 6. 26E-77  | 166. 0897 |
| SLC27A4     | 1. 319973 | 3. 736158 | 20. 7151  | 6. 70E-61  | 6. 46E-60  | 126. 3502 |
| URM1        | 1. 062224 | 5. 020013 | 16. 49837 | 1. 37E-44  | 9. 06E-44  | 88. 78736 |
| CERCAM      | 2. 25478  | 4. 486329 | 24. 34853 | 1. 36E-74  | 1. 95E-73  | 157. 9153 |
| ODF2        | 1. 088913 | 3. 366913 | 18. 95354 | 4. 14E-54  | 3. 37E-53  | 110. 7059 |
| GLE1        | 1. 360498 | 2. 805579 | 26. 47884 | 2. 37E-82  | 4. 41E-81  | 175. 8054 |
| SPTAN1      | 1. 960532 | 5. 961954 | 25. 71225 | 1. 38E-79  | 2. 34E-78  | 169. 4268 |
| WDR34       | 1. 524237 | 4. 835215 | 21. 05512 | 3. 35E-62  | 3. 33E-61  | 129. 3502 |
| SET         | 1. 783162 | 6. 359646 | 22. 80804 | 7. 50E-69  | 8. 98E-68  | 144. 6765 |
| PKN3        | 1. 059745 | 2. 237515 | 17. 43173 | 3. 30E-48  | 2. 35E-47  | 97. 11569 |
| P11-545E17. | 1. 226149 | 1. 630827 | 21. 53757 | 4. 82E-64  | 5. 05E-63  | 133. 5929 |
| ZER1        | 1. 101675 | 3. 672341 | 20. 57833 | 2. 24E-60  | 2. 13E-59  | 125. 1415 |
| C9orf114    | 1. 073889 | 4. 292277 | 17. 47799 | 2. 18E-48  | 1. 56E-47  | 97. 52895 |
| CCBL1       | 1. 233348 | 2. 000409 | 20. 82567 | 2. 53E-61  | 2. 46E-60  | 127. 3266 |
| LRRC8A      | 2. 749098 | 4. 218134 | 32. 21603 | 4. 64E-102 | 2. 17E-100 | 221. 2705 |
| DOLK        | 1. 116317 | 2. 886008 | 22. 58706 | 5. 09E-68  | 5. 95E-67  | 142. 7587 |
| DOLPP1      | 1. 308914 | 2. 940104 | 25. 0602  | 3. 28E-77  | 5. 13E-76  | 163. 9484 |
| PPP2R4      | 2. 165576 | 5. 662407 | 29. 37796 | 1. 56E-92  | 4. 47E-91  | 199. 2906 |
| IER5L       | 2. 319954 | 2. 555592 | 23. 08254 | 6. 99E-70  | 8. 64E-69  | 147. 0526 |
| LINC01503   | 2. 661523 | 1. 997093 | 30. 93236 | 8. 34E-98  | 3. 11E-96  | 211. 454  |
| NTMT1       | 1. 744913 | 4. 457229 | 28. 64409 | 5. 35E-90  | 1. 36E-88  | 193. 4431 |
| ASB6        | 1. 00658  | 3. 210231 | 19. 33141 | 1. 43E-55  | 1. 20E-54  | 114. 0734 |
| PRRX2       | 2. 703861 | 1. 719498 | 31. 3104  | 4. 56E-99  | 1. 81E-97  | 214. 3664 |
| PTGES       | 3. 993611 | 2. 531636 | 36. 22093 | 9. 18E-115 | 9. 38E-113 | 250. 5852 |
| TOR1B       | 1. 432088 | 3. 31625  | 24. 94884 | 8. 40E-77  | 1. 30E-75  | 163. 0079 |
| TOR1A       | 1. 690851 | 3. 81865  | 31. 63821 | 3. 72E-100 | 1. 57E-98  | 216. 8774 |
| C9orf78     | 1. 361347 | 4. 673538 | 22. 06736 | 4. 69E-66  | 5. 18E-65  | 138. 2313 |
| FNBP1       | 1. 636801 | 2. 75237  | 23. 15327 | 3. 80E-70  | 4. 73E-69  | 147. 6637 |
| GPR107      | 1. 536142 | 3. 472594 | 25. 8354  | 4. 95E-80  | 8. 48E-79  | 170. 4561 |
| NCS1        | 1. 861011 | 2. 295418 | 26. 15144 | 3. 57E-81  | 6. 36E-80  | 173. 0895 |
| ASS1        | 3. 002784 | 5. 763091 | 32. 26614 | 3. 18E-102 | 1. 51E-100 | 221. 6496 |
| ABL1        | 1. 30391  | 3. 814605 | 18. 56662 | 1. 30E-52  | 1. 02E-51  | 107. 2536 |
| FIBCD1      | 2. 203194 | 1. 087582 | 18. 38357 | 6. 69E-52  | 5. 17E-51  | 105. 6191 |
| NUP214      | 1. 35373  | 4. 141126 | 23. 48336 | 2. 21E-71  | 2. 85E-70  | 150. 5092 |
| FAM78A      | 1. 355156 | 1. 181567 | 20. 94071 | 9. 16E-62  | 9. 02E-61  | 128. 3416 |
| MED27       | 1. 916664 | 2. 986368 | 39. 40455 | 2. 87E-124 | 5. 24E-122 | 272. 5198 |
| SETX        | 1. 11947  | 3. 501963 | 18. 86933 | 8. 76E-54  | 7. 08E-53  | 109. 9548 |
| TTF1        | 1. 175884 | 2. 834707 | 22. 5495  | 7. 06E-68  | 8. 22E-67  | 142. 4323 |

|          |           |           |           |            |            |           |
|----------|-----------|-----------|-----------|------------|------------|-----------|
| GTF3C4   | 1. 13556  | 1. 807552 | 25. 17714 | 1. 23E-77  | 1. 95E-76  | 164. 9344 |
| AK8      | 1. 193465 | 0. 943371 | 20. 40386 | 1. 05E-59  | 9. 77E-59  | 123. 5977 |
| EEF1A1P5 | 1. 27119  | 6. 345671 | 14. 03418 | 3. 85E-35  | 2. 10E-34  | 67. 05597 |
| CEL      | -8. 19665 | 9. 382283 | -23. 7606 | 2. 05E-72  | 2. 74E-71  | 152. 8905 |
| CELP     | -6. 09918 | 4. 654034 | -30. 593  | 1. 15E-96  | 4. 06E-95  | 208. 824  |
| RALGDS   | 1. 049968 | 4. 669366 | 14. 22222 | 7. 47E-36  | 4. 13E-35  | 68. 69191 |
| GBGT1    | 1. 265357 | 2. 087994 | 12. 67413 | 4. 58E-30  | 2. 26E-29  | 55. 39739 |
| MED22    | 1. 127467 | 3. 001527 | 22. 03052 | 6. 47E-66  | 7. 12E-65  | 137. 9095 |
| SURF4    | 1. 088034 | 6. 234144 | 15. 22562 | 1. 11E-39  | 6. 64E-39  | 77. 49492 |
| CACFD1   | 1. 363576 | 3. 65882  | 21. 3278  | 3. 04E-63  | 3. 12E-62  | 131. 7503 |
| SLC2A6   | 1. 626406 | 1. 793762 | 22. 71138 | 1. 73E-68  | 2. 05E-67  | 143. 8382 |
| ADAMTSL2 | 1. 859088 | 2. 680395 | 20. 66917 | 1. 01E-60  | 9. 64E-60  | 125. 9444 |
| DBH-AS1  | -1. 32354 | 1. 534033 | -19. 3684 | 1. 03E-55  | 8. 68E-55  | 114. 4028 |
| SARDH    | -1. 81861 | 2. 589389 | -26. 1096 | 5. 05E-81  | 8. 95E-80  | 172. 7415 |
| BRD3     | 1. 215813 | 2. 843791 | 21. 17939 | 1. 12E-62  | 1. 13E-61  | 130. 4447 |
| COL5A1   | 4. 924347 | 4. 250019 | 40. 42491 | 3. 30E-127 | 7. 34E-125 | 279. 3052 |
| FCN1     | 1. 79349  | 1. 618594 | 13. 01373 | 2. 55E-31  | 1. 29E-30  | 58. 27617 |
| C9orf116 | 1. 151395 | 2. 081766 | 18. 67418 | 5. 00E-53  | 3. 96E-52  | 108. 2137 |
| PAEP     | 1. 471804 | 0. 710763 | 11. 66198 | 2. 14E-26  | 9. 80E-26  | 46. 97599 |
| CAMSAP1  | 1. 094735 | 2. 351226 | 19. 82506 | 1. 77E-57  | 1. 57E-56  | 118. 4644 |
| UBAC1    | 1. 369939 | 4. 03067  | 24. 91118 | 1. 15E-76  | 1. 77E-75  | 162. 6896 |
| C9orf69  | 1. 776036 | 3. 499068 | 31. 28249 | 5. 65E-99  | 2. 23E-97  | 214. 1519 |
| EGFL7    | 1. 226644 | 4. 103813 | 12. 20472 | 2. 38E-28  | 1. 13E-27  | 51. 46017 |
| AGPAT2   | 1. 126108 | 6. 06247  | 11. 91216 | 2. 71E-27  | 1. 27E-26  | 49. 03336 |
| TMEM141  | 1. 738727 | 5. 997138 | 20. 63839 | 1. 32E-60  | 1. 26E-59  | 125. 6724 |
| EDF1     | 1. 079531 | 8. 467685 | 13. 30973 | 2. 02E-32  | 1. 05E-31  | 60. 80417 |
| TRAF2    | 2. 109541 | 2. 99608  | 34. 43809 | 3. 26E-109 | 2. 34E-107 | 237. 7781 |
| PTGDS    | 1. 931444 | 5. 759506 | 13. 13731 | 8. 87E-32  | 4. 54E-31  | 59. 32951 |
| CLIC3    | 4. 436047 | 2. 549022 | 34. 4395  | 3. 22E-109 | 2. 32E-107 | 237. 7884 |
| ABCA2    | 1. 173037 | 4. 193465 | 15. 56875 | 5. 32E-41  | 3. 27E-40  | 80. 5284  |
| NPDC1    | 1. 437677 | 5. 787092 | 13. 11907 | 1. 04E-31  | 5. 30E-31  | 59. 17391 |
| ENTPD2   | 2. 524677 | 2. 283908 | 28. 13349 | 3. 23E-88  | 7. 50E-87  | 189. 3353 |
| SAPCD2   | 2. 122865 | 1. 209365 | 33. 45052 | 4. 56E-106 | 2. 72E-104 | 230. 5169 |
| MAN1B1   | 1. 71868  | 4. 826671 | 26. 35052 | 6. 85E-82  | 1. 25E-80  | 174. 7424 |
| DPP7     | 1. 068799 | 6. 612449 | 13. 06065 | 1. 71E-31  | 8. 69E-31  | 58. 67578 |
| SSNA1    | 1. 135216 | 5. 604298 | 16. 54746 | 8. 84E-45  | 5. 88E-44  | 89. 22472 |
| TPRN     | -1. 14406 | 4. 68908  | -12. 8214 | 1. 31E-30  | 6. 55E-30  | 56. 64306 |
| TMEM203  | 1. 477835 | 4. 083817 | 29. 13496 | 1. 07E-91  | 2. 97E-90  | 197. 3618 |
| CYSRT1   | 1. 028135 | 1. 051912 | 14. 19717 | 9. 30E-36  | 5. 13E-35  | 68. 47368 |
| TUBB4B   | 2. 420029 | 6. 336257 | 29. 09235 | 1. 50E-91  | 4. 13E-90  | 197. 0228 |
| NELFB    | 1. 349312 | 4. 541973 | 22. 3167  | 5. 34E-67  | 6. 06E-66  | 140. 4064 |
| TOR4A    | 2. 901615 | 2. 65067  | 40. 28285 | 8. 41E-127 | 1. 80E-124 | 278. 3674 |
| ENTPD8   | 1. 230843 | 1. 56995  | 12. 614   | 7. 61E-30  | 3. 73E-29  | 54. 89024 |
| PNPLA7   | -1. 47804 | 2. 950638 | -20. 8132 | 2. 82E-61  | 2. 74E-60  | 127. 2167 |
| ZMYND19  | 1. 134062 | 3. 495192 | 20. 63415 | 1. 37E-60  | 1. 31E-59  | 125. 6349 |
| ARRDC1   | 1. 333939 | 5. 470878 | 15. 62287 | 3. 29E-41  | 2. 03E-40  | 81. 00773 |
| DIP2C    | 1. 144185 | 2. 154863 | 20. 42013 | 9. 08E-60  | 8. 48E-59  | 123. 7417 |
| LARP4B   | 1. 165702 | 3. 62159  | 20. 33576 | 1. 92E-59  | 1. 77E-58  | 122. 9947 |
| GTPBP4   | 1. 490689 | 3. 969616 | 24. 05538 | 1. 65E-73  | 2. 28E-72  | 155. 4145 |
| IDI1     | 1. 474125 | 4. 100809 | 20. 1772  | 7. 80E-59  | 7. 11E-58  | 121. 5896 |
| PFKP     | 3. 714442 | 4. 294944 | 38. 77917 | 1. 93E-122 | 3. 19E-120 | 268. 3033 |
| KLF6     | 1. 423933 | 5. 210052 | 12. 9712  | 3. 67E-31  | 1. 85E-30  | 57. 91434 |
| AKR1C2   | 2. 236561 | 3. 229103 | 16. 52989 | 1. 03E-44  | 6. 86E-44  | 89. 06818 |
| AKR1C1   | 1. 20103  | 3. 911131 | 8. 743049 | 1. 35E-16  | 4. 95E-16  | 24. 55723 |

|               |           |           |           |            |            |           |
|---------------|-----------|-----------|-----------|------------|------------|-----------|
| AKR1C3        | 2. 434842 | 4. 994303 | 24. 15212 | 7. 23E-74  | 1. 01E-72  | 156. 2408 |
| UCN3          | 1. 098409 | 1. 648077 | 8. 583021 | 4. 19E-16  | 1. 52E-15  | 23. 43256 |
| NET1          | 2. 347851 | 4. 790069 | 26. 90351 | 7. 18E-84  | 1. 41E-82  | 179. 3093 |
| P13-463N16.   | 1. 371526 | 0. 666968 | 20. 01452 | 3. 30E-58  | 2. 97E-57  | 120. 1466 |
| ASB13         | 1. 496343 | 3. 43096  | 21. 87    | 2. 63E-65  | 2. 85E-64  | 136. 5061 |
| GDI2          | 1. 304051 | 6. 268159 | 17. 78218 | 1. 44E-49  | 1. 06E-48  | 100. 2467 |
| FBX018        | 1. 181871 | 4. 602687 | 18. 55652 | 1. 43E-52  | 1. 12E-51  | 107. 1634 |
| IL15RA        | 1. 72095  | 3. 836758 | 19. 41691 | 6. 67E-56  | 5. 67E-55  | 114. 8346 |
| IL2RA         | 1. 944548 | 1. 03396  | 24. 1645  | 6. 50E-74  | 9. 13E-73  | 156. 3465 |
| PFKFB3        | 2. 322077 | 3. 901202 | 23. 24402 | 1. 74E-70  | 2. 19E-69  | 148. 447  |
| RP11-554I8. 2 | 1. 280292 | 0. 626785 | 18. 46624 | 3. 20E-52  | 2. 49E-51  | 106. 3573 |
| ITIH5         | 1. 736208 | 2. 884026 | 17. 98442 | 2. 36E-50  | 1. 77E-49  | 102. 0536 |
| ITIH2         | 1. 277353 | 0. 72554  | 17. 06997 | 8. 35E-47  | 5. 80E-46  | 93. 88513 |
| KIN           | 1. 379597 | 2. 538114 | 29. 96358 | 1. 56E-94  | 4. 94E-93  | 203. 9086 |
| ATP5C1        | 1. 269025 | 7. 039618 | 16. 97004 | 2. 04E-46  | 1. 40E-45  | 92. 9932  |
| GATA3         | 2. 020589 | 1. 093916 | 25. 38169 | 2. 20E-78  | 3. 59E-77  | 166. 6555 |
| CELF2         | 1. 410515 | 1. 574444 | 16. 9313  | 2. 88E-46  | 1. 98E-45  | 92. 64751 |
| USP6NL        | 1. 675243 | 2. 185126 | 33. 13369 | 4. 79E-105 | 2. 68E-103 | 228. 1619 |
| ECHDC3        | -1. 23024 | 2. 886353 | -15. 1369 | 2. 43E-39  | 1. 44E-38  | 76. 71258 |
| PROSER2       | 1. 122739 | 2. 62142  | 15. 12789 | 2. 63E-39  | 1. 56E-38  | 76. 63284 |
| NUDT5         | 1. 735833 | 4. 421238 | 28. 67379 | 4. 22E-90  | 1. 08E-88  | 193. 6811 |
| CDC123        | 1. 917061 | 4. 516383 | 33. 02297 | 1. 09E-104 | 6. 00E-103 | 227. 336  |
| CCDC3         | 2. 080951 | 2. 232747 | 24. 11318 | 1. 01E-73  | 1. 40E-72  | 155. 9083 |
| OPTN          | 2. 076091 | 4. 833935 | 30. 50906 | 2. 21E-96  | 7. 63E-95  | 208. 1716 |
| PRPF18        | 1. 390639 | 3. 089789 | 28. 96751 | 4. 05E-91  | 1. 09E-89  | 196. 0284 |
| RP11-295P9. 5 | -1. 05269 | 3. 724588 | -14. 7053 | 1. 09E-37  | 6. 27E-37  | 72. 91577 |
| HSPA14        | 1. 067443 | 3. 303978 | 19. 99848 | 3. 81E-58  | 3. 41E-57  | 120. 0042 |
| DCLRE1C       | 1. 133499 | 1. 744258 | 23. 55017 | 1. 25E-71  | 1. 62E-70  | 151. 0838 |
| RPP38         | 1. 51312  | 3. 407533 | 29. 79591 | 5. 79E-94  | 1. 79E-92  | 202. 5909 |
| RSU1          | 1. 481301 | 4. 802296 | 20. 79591 | 3. 28E-61  | 3. 19E-60  | 127. 0639 |
| VIM           | 2. 506371 | 8. 177852 | 22. 62294 | 3. 73E-68  | 4. 38E-67  | 143. 0705 |
| HACD1         | 1. 018733 | 1. 936059 | 11. 29222 | 4. 39E-25  | 1. 95E-24  | 43. 96785 |
| STAM          | 1. 064593 | 2. 833639 | 19. 77877 | 2. 67E-57  | 2. 35E-56  | 118. 053  |
| MRC1          | 2. 253135 | 2. 14501  | 18. 63647 | 7. 00E-53  | 5. 53E-52  | 107. 8771 |
| P11-499P20.   | -1. 2447  | 1. 637755 | -24. 6002 | 1. 60E-75  | 2. 37E-74  | 160. 0549 |
| PLXDC2        | 3. 084203 | 2. 473794 | 34. 58155 | 1. 15E-109 | 8. 47E-108 | 238. 8229 |
| BMI1          | 1. 177246 | 3. 886538 | 16. 33645 | 5. 79E-44  | 3. 79E-43  | 87. 34537 |
| PIP4K2A       | 1. 992259 | 2. 787624 | 30. 88897 | 1. 17E-97  | 4. 31E-96  | 211. 1185 |
| MSRB2         | 2. 886587 | 3. 729802 | 41. 61214 | 1. 45E-130 | 4. 23E-128 | 287. 0562 |
| PTF1A         | -3. 56527 | 2. 499095 | -32. 1311 | 8. 82E-102 | 4. 06E-100 | 220. 6272 |
| OTUD1         | 1. 307181 | 2. 425979 | 25. 78226 | 7. 71E-80  | 1. 32E-78  | 170. 0122 |
| KIAA1217      | 1. 692301 | 3. 595293 | 23. 796   | 1. 51E-72  | 2. 03E-71  | 153. 1944 |
| ARHGAP21      | 1. 356062 | 3. 653995 | 20. 25134 | 4. 05E-59  | 3. 71E-58  | 122. 2468 |
| PRTFDC1       | 2. 037787 | 2. 118754 | 35. 01815 | 4. 88E-111 | 3. 94E-109 | 241. 9872 |
| APBB1IP       | 1. 563042 | 1. 925031 | 18. 33607 | 1. 02E-51  | 7. 88E-51  | 105. 1949 |
| PDSS1         | 1. 219131 | 1. 629563 | 26. 54012 | 1. 43E-82  | 2. 68E-81  | 176. 3123 |
| ABI1          | 1. 878422 | 3. 890451 | 29. 75249 | 8. 15E-94  | 2. 49E-92  | 202. 249  |
| YME1L1        | 1. 464137 | 4. 576925 | 23. 64545 | 5. 50E-72  | 7. 21E-71  | 151. 9025 |
| MASTL         | 1. 276245 | 1. 720128 | 27. 74704 | 7. 35E-87  | 1. 61E-85  | 186. 205  |
| ACBD5         | 1. 842588 | 2. 835125 | 29. 91561 | 2. 26E-94  | 7. 11E-93  | 203. 532  |
| RAB18         | 1. 532177 | 4. 300044 | 23. 10981 | 5. 52E-70  | 6. 85E-69  | 147. 2883 |
| WAC-AS1       | 1. 436978 | 2. 988611 | 29. 40835 | 1. 23E-92  | 3. 54E-91  | 199. 5313 |
| WAC           | 1. 123042 | 4. 718481 | 16. 46848 | 1. 79E-44  | 1. 18E-43  | 88. 52109 |
| BAMBI         | 1. 892106 | 2. 42406  | 25. 58848 | 3. 89E-79  | 6. 49E-78  | 168. 3906 |

|               |           |           |           |            |            |           |
|---------------|-----------|-----------|-----------|------------|------------|-----------|
| PTCHD3P1      | 1. 226932 | 1. 353856 | 18. 41525 | 5. 04E-52  | 3. 91E-51  | 105. 902  |
| SVIL          | 1. 832124 | 3. 421176 | 23. 37965 | 5. 40E-71  | 6. 88E-70  | 149. 6163 |
| MAP3K8        | 1. 527118 | 2. 58078  | 20. 81154 | 2. 86E-61  | 2. 78E-60  | 127. 2019 |
| ZNF438        | 1. 64571  | 1. 931072 | 38. 0376  | 3. 00E-120 | 4. 26E-118 | 263. 2457 |
| ZEB1-AS1      | 1. 492873 | 1. 876477 | 27. 21812 | 5. 45E-85  | 1. 11E-83  | 181. 8912 |
| ZEB1          | 2. 128305 | 2. 452922 | 25. 43144 | 1. 45E-78  | 2. 38E-77  | 167. 0733 |
| ARHGAP12      | 1. 092581 | 3. 956929 | 18. 11508 | 7. 36E-51  | 5. 55E-50  | 103. 2209 |
| KIF5B         | 1. 825073 | 4. 277428 | 27. 48042 | 6. 41E-86  | 1. 36E-84  | 184. 0347 |
| P11-479G22.   | 1. 428263 | 1. 407215 | 23. 21382 | 2. 25E-70  | 2. 83E-69  | 148. 1865 |
| ITGB1         | 3. 18118  | 6. 733736 | 34. 75569 | 3. 25E-110 | 2. 46E-108 | 240. 0877 |
| NRP1          | 1. 733998 | 4. 09309  | 20. 41521 | 9. 49E-60  | 8. 85E-59  | 123. 6982 |
| CUL2          | 1. 297274 | 2. 943123 | 24. 54702 | 2. 52E-75  | 3. 70E-74  | 159. 6035 |
| CREM          | 1. 547035 | 3. 86921  | 20. 88041 | 1. 56E-61  | 1. 53E-60  | 127. 8097 |
| CCNY          | 1. 281424 | 4. 032438 | 20. 99886 | 5. 49E-62  | 5. 43E-61  | 128. 8544 |
| NAMPTP1       | 1. 525923 | 1. 570307 | 15. 95833 | 1. 68E-42  | 1. 06E-41  | 83. 98326 |
| BMS1          | 1. 219185 | 2. 644401 | 28. 78541 | 1. 73E-90  | 4. 51E-89  | 194. 5744 |
| CSGALNACT2    | 1. 870899 | 2. 732465 | 26. 37108 | 5. 78E-82  | 1. 06E-80  | 174. 9129 |
| HNRNPF        | 2. 003208 | 5. 856857 | 25. 75266 | 9. 87E-80  | 1. 67E-78  | 169. 7647 |
| ZNF487        | 1. 309483 | 1. 613875 | 29. 47629 | 7. 18E-93  | 2. 09E-91  | 200. 069  |
| ALOX5         | 1. 758365 | 4. 716471 | 16. 41041 | 3. 00E-44  | 1. 97E-43  | 88. 00387 |
| TIMM23        | 2. 048521 | 4. 485786 | 37. 88352 | 8. 62E-120 | 1. 19E-117 | 262. 1869 |
| NCOA4         | 1. 584879 | 4. 922972 | 22. 8323  | 6. 08E-69  | 7. 31E-68  | 144. 8868 |
| MSMB          | 1. 90753  | 1. 26161  | 11. 44419 | 1. 28E-25  | 5. 74E-25  | 45. 19936 |
| ANXA8L1       | 3. 354103 | 1. 789517 | 24. 78484 | 3. 36E-76  | 5. 08E-75  | 161. 6206 |
| HNRNPA1P33    | 2. 709223 | 1. 431934 | 27. 00259 | 3. 18E-84  | 6. 33E-83  | 180. 1237 |
| GDF10         | -1. 99163 | 1. 441322 | -32. 3274 | 2. 00E-102 | 9. 63E-101 | 222. 1123 |
| ZNF488        | 1. 08177  | 0. 547912 | 19. 13865 | 7. 95E-55  | 6. 60E-54  | 112. 3562 |
| ANXA8         | 3. 952987 | 2. 088604 | 26. 39846 | 4. 61E-82  | 8. 48E-81  | 175. 1398 |
| CTSLP2        | -1. 02465 | 0. 895254 | -18. 1451 | 5. 62E-51  | 4. 25E-50  | 103. 4895 |
| 7-42404400C2  | -1. 03892 | 0. 83105  | -20. 787  | 3. 55E-61  | 3. 45E-60  | 126. 9849 |
| CH17-360D5. 2 | 2. 615764 | 1. 359507 | 31. 90586 | 4. 86E-101 | 2. 14E-99  | 218. 9175 |
| CH17-360D5. 3 | 1. 681504 | 0. 84449  | 20. 61121 | 1. 68E-60  | 1. 60E-59  | 125. 4321 |
| MAPK8         | 1. 023401 | 3. 29428  | 15. 68231 | 1. 94E-41  | 1. 20E-40  | 81. 53438 |
| ARHGAP22      | 1. 193827 | 1. 580139 | 20. 70906 | 7. 07E-61  | 6. 81E-60  | 126. 2969 |
| WDFY4         | 1. 753826 | 1. 238218 | 21. 58391 | 3. 21E-64  | 3. 38E-63  | 133. 9995 |
| VSTM4         | 1. 837901 | 1. 414717 | 27. 75791 | 6. 73E-87  | 1. 48E-85  | 186. 2933 |
| C10orf128     | 1. 678963 | 2. 246254 | 20. 36014 | 1. 54E-59  | 1. 43E-58  | 123. 2106 |
| PARG          | 1. 287202 | 2. 352766 | 26. 37998 | 5. 37E-82  | 9. 86E-81  | 174. 9866 |
| FAM21A        | 1. 214623 | 3. 495861 | 21. 50616 | 6. 35E-64  | 6. 63E-63  | 133. 3172 |
| PRKG1         | 1. 488101 | 1. 296694 | 26. 65646 | 5. 48E-83  | 1. 04E-81  | 177. 2735 |
| CSTF2T        | 1. 203332 | 2. 77884  | 24. 37101 | 1. 12E-74  | 1. 61E-73  | 158. 1068 |
| DKK1          | 3. 584281 | 1. 907665 | 26. 0331  | 9. 54E-81  | 1. 67E-79  | 172. 1048 |
| ZWINT         | 2. 809757 | 2. 516243 | 42. 58835 | 2. 81E-133 | 1. 07E-130 | 293. 3161 |
| CISD1         | 1. 844599 | 3. 857707 | 33. 30888 | 1. 30E-105 | 7. 54E-104 | 229. 4656 |
| UBE2D1        | 1. 725575 | 2. 777372 | 28. 85505 | 9. 92E-91  | 2. 62E-89  | 195. 1309 |
| TFAM          | 1. 270114 | 2. 714446 | 20. 87221 | 1. 68E-61  | 1. 64E-60  | 127. 7374 |
| CCDC6         | 1. 680271 | 3. 701    | 28. 4016  | 3. 74E-89  | 9. 09E-88  | 191. 4963 |
| CDK1          | 3. 235045 | 2. 008283 | 48. 14683 | 6. 35E-148 | 7. 39E-145 | 327. 1203 |
| ARID5B        | 2. 052903 | 2. 09683  | 28. 09133 | 4. 54E-88  | 1. 05E-86  | 188. 9947 |
| RTKN2         | 1. 615295 | 0. 840278 | 27. 88046 | 2. 49E-87  | 5. 57E-86  | 187. 2878 |
| ZNF365        | 1. 719934 | 0. 954442 | 24. 83138 | 2. 26E-76  | 3. 45E-75  | 162. 0146 |
| ADO           | 1. 864442 | 2. 424522 | 44. 15566 | 1. 53E-137 | 7. 90E-135 | 303. 158  |
| EGR2          | 2. 808367 | 1. 740473 | 31. 47385 | 1. 30E-99  | 5. 33E-98  | 215. 6201 |
| NRBF2         | 1. 832241 | 3. 069005 | 36. 7919  | 1. 66E-116 | 1. 89E-114 | 254. 6062 |

|               |           |           |           |            |            |           |
|---------------|-----------|-----------|-----------|------------|------------|-----------|
| JMJD1C        | 1. 232489 | 4. 145403 | 18. 0462  | 1. 36E-50  | 1. 02E-49  | 102. 6056 |
| REEP3         | 2. 346484 | 3. 008076 | 34. 80041 | 2. 35E-110 | 1. 80E-108 | 240. 412  |
| HERC4         | 1. 07576  | 3. 354686 | 18. 0749  | 1. 05E-50  | 7. 92E-50  | 102. 862  |
| DDX50         | 1. 169357 | 3. 83322  | 21. 13139 | 1. 71E-62  | 1. 72E-61  | 130. 022  |
| DDX21         | 1. 082719 | 4. 076833 | 13. 02476 | 2. 32E-31  | 1. 18E-30  | 58. 37008 |
| KIF1BP        | 1. 418962 | 2. 979885 | 25. 52609 | 6. 56E-79  | 1. 09E-77  | 167. 8676 |
| SRGN          | 3. 372723 | 4. 788749 | 29. 2373  | 4. 75E-92  | 1. 33E-90  | 198. 175  |
| VPS26A        | 1. 715712 | 3. 921227 | 30. 41829 | 4. 47E-96  | 1. 53E-94  | 207. 4648 |
| SUPV3L1       | 1. 112077 | 3. 822681 | 19. 57571 | 1. 63E-56  | 1. 40E-55  | 116. 2477 |
| HKDC1         | 2. 336665 | 2. 931816 | 25. 97414 | 1. 56E-80  | 2. 71E-79  | 171. 6136 |
| HK1           | 3. 035114 | 3. 926738 | 42. 76526 | 9. 15E-134 | 3. 66E-131 | 294. 4397 |
| TSPAN15       | 3. 447185 | 4. 690661 | 37. 15428 | 1. 33E-117 | 1. 61E-115 | 257. 1382 |
| C10orf35      | 1. 139713 | 2. 631577 | 20. 7332  | 5. 71E-61  | 5. 52E-60  | 126. 5101 |
| COL13A1       | 1. 549961 | 1. 504334 | 25. 67369 | 1. 91E-79  | 3. 21E-78  | 169. 1042 |
| H2AFY2        | 1. 945011 | 2. 838601 | 28. 41874 | 3. 25E-89  | 7. 96E-88  | 191. 6342 |
| AIFM2         | 1. 808686 | 2. 39465  | 34. 8856  | 1. 27E-110 | 9. 89E-109 | 241. 029  |
| SAR1A         | 1. 595117 | 4. 578847 | 28. 78302 | 1. 76E-90  | 4. 59E-89  | 194. 5553 |
| PPA1          | 1. 356089 | 6. 696038 | 16. 29772 | 8. 18E-44  | 5. 33E-43  | 87. 00072 |
| LRRC20        | 1. 817464 | 1. 975274 | 34. 12634 | 3. 16E-108 | 2. 13E-106 | 235. 4989 |
| PRF1          | 1. 542977 | 1. 19396  | 24. 8842  | 1. 45E-76  | 2. 22E-75  | 162. 4615 |
| ADAMTS14      | 1. 973431 | 1. 07619  | 30. 58521 | 1. 22E-96  | 4. 30E-95  | 208. 7637 |
| SGPL1         | 1. 315345 | 3. 659176 | 20. 4513  | 6. 89E-60  | 6. 45E-59  | 124. 0176 |
| UNC5B         | 2. 700354 | 2. 579074 | 34. 9385  | 8. 67E-111 | 6. 89E-109 | 241. 4116 |
| UNC5B-AS1     | 2. 284271 | 1. 288835 | 20. 49738 | 4. 59E-60  | 4. 32E-59  | 124. 4254 |
| SLC29A3       | 1. 59476  | 2. 33799  | 28. 47407 | 2. 09E-89  | 5. 14E-88  | 192. 0789 |
| C10orf54      | 2. 669031 | 4. 120596 | 32. 1275  | 9. 06E-102 | 4. 16E-100 | 220. 6001 |
| PSAP          | 2. 227239 | 8. 460759 | 25. 26669 | 5. 78E-78  | 9. 29E-77  | 165. 6885 |
| CHST3         | 1. 403051 | 2. 042805 | 19. 47383 | 4. 02E-56  | 3. 44E-55  | 115. 3412 |
| SPOCK2        | 2. 705879 | 2. 036346 | 26. 64409 | 6. 06E-83  | 1. 15E-81  | 177. 1713 |
| ASCC1         | 1. 074515 | 3. 676414 | 12. 60181 | 8. 44E-30  | 4. 14E-29  | 54. 7875  |
| P11-442H21.   | 2. 390185 | 1. 214565 | 12. 73264 | 2. 79E-30  | 1. 38E-29  | 55. 89164 |
| DNAJB12       | 1. 26917  | 4. 10332  | 21. 46226 | 9. 34E-64  | 9. 71E-63  | 132. 9317 |
| MICU1         | 2. 316679 | 4. 030335 | 40. 94555 | 1. 09E-128 | 2. 74E-126 | 282. 7232 |
| MCU           | 2. 664208 | 3. 539134 | 34. 71201 | 4. 46E-110 | 3. 35E-108 | 239. 7708 |
| P4HA1         | 2. 152021 | 3. 903469 | 23. 86765 | 8. 20E-73  | 1. 11E-71  | 153. 8083 |
| ECD           | 1. 528337 | 3. 223907 | 31. 50171 | 1. 05E-99  | 4. 31E-98  | 215. 8334 |
| FAM149B1      | 1. 000321 | 3. 232774 | 19. 26976 | 2. 47E-55  | 2. 08E-54  | 113. 5243 |
| DNAJC9        | 1. 457995 | 2. 823339 | 28. 95262 | 4. 56E-91  | 1. 22E-89  | 195. 9096 |
| MRPS16        | 1. 498599 | 5. 217975 | 24. 68933 | 7. 53E-76  | 1. 13E-74  | 160. 8113 |
| ANXA7         | 1. 929795 | 5. 358781 | 27. 38535 | 1. 39E-85  | 2. 90E-84  | 183. 2588 |
| PPP3CB        | 1. 058904 | 3. 840894 | 19. 16141 | 6. 49E-55  | 5. 40E-54  | 112. 559  |
| FUT11         | 1. 898173 | 3. 06353  | 31. 80139 | 1. 07E-100 | 4. 66E-99  | 218. 1222 |
| CHCHD1        | 1. 956051 | 4. 530651 | 34. 93008 | 9. 21E-111 | 7. 30E-109 | 241. 3508 |
| CAMK2G        | 1. 386515 | 3. 204203 | 22. 08844 | 3. 90E-66  | 4. 32E-65  | 138. 4155 |
| PLAU          | 4. 869198 | 4. 00365  | 41. 7716  | 5. 18E-131 | 1. 61E-128 | 288. 0857 |
| VCL           | 2. 334455 | 4. 552479 | 32. 2601  | 3. 33E-102 | 1. 57E-100 | 221. 6039 |
| AP3M1         | 1. 009387 | 3. 198745 | 18. 93383 | 4. 93E-54  | 4. 01E-53  | 110. 5302 |
| ADK           | 1. 470516 | 3. 450011 | 25. 48857 | 8. 98E-79  | 1. 48E-77  | 167. 5529 |
| SAMD8         | 1. 313171 | 1. 997438 | 26. 17978 | 2. 82E-81  | 5. 04E-80  | 173. 3251 |
| VDAC2         | 1. 100355 | 6. 437925 | 14. 15952 | 1. 29E-35  | 7. 11E-35  | 68. 14587 |
| COMTD1        | -1. 1244  | 5. 430153 | -11. 9476 | 2. 02E-27  | 9. 47E-27  | 49. 3259  |
| KCNMA1        | 1. 069795 | 2. 404042 | 12. 17181 | 3. 13E-28  | 1. 49E-27  | 51. 18607 |
| RP13-39P12. 5 | 1. 483866 | 2. 076415 | 13. 87527 | 1. 53E-34  | 8. 27E-34  | 65. 67745 |
| DLG5          | 1. 293499 | 3. 334506 | 17. 95096 | 3. 19E-50  | 2. 37E-49  | 101. 7546 |



|           |          |          |          |           |           |          |
|-----------|----------|----------|----------|-----------|-----------|----------|
| RPS24     | 1.203242 | 10.94863 | 11.42747 | 1.46E-25  | 6.56E-25  | 45.06351 |
| ZMIZ1     | 1.313627 | 3.887051 | 18.31287 | 1.26E-51  | 9.67E-51  | 104.9877 |
| ZCCHC24   | 1.783431 | 2.904638 | 21.45794 | 9.70E-64  | 1.01E-62  | 132.8938 |
| MBL1P     | -1.8301  | 1.597798 | -35.2    | 1.32E-111 | 1.10E-109 | 243.2984 |
| PLAC9     | 1.756565 | 2.61194  | 20.03334 | 2.79E-58  | 2.51E-57  | 120.3136 |
| ANXA11    | 2.45613  | 6.852394 | 29.94747 | 1.76E-94  | 5.58E-93  | 203.7822 |
| LINCO0857 | 2.163235 | 1.235543 | 38.7546  | 2.28E-122 | 3.72E-120 | 268.1368 |
| EIF5AP4   | 2.441686 | 1.25016  | 54.31173 | 9.80E-163 | 3.71E-159 | 361.3098 |
| MAT1A     | -2.66223 | 2.158439 | -32.7862 | 6.39E-104 | 3.35E-102 | 225.5649 |
| FAM213A   | 1.517662 | 4.596129 | 26.19942 | 2.40E-81  | 4.29E-80  | 173.4883 |
| TSPAN14   | 1.948604 | 4.491491 | 28.98331 | 3.57E-91  | 9.65E-90  | 196.1543 |
| NRG3      | 1.600009 | 0.820221 | 19.44271 | 5.30E-56  | 4.52E-55  | 115.0643 |
| GHITM     | 1.778321 | 5.496531 | 28.26026 | 1.16E-88  | 2.76E-87  | 190.3582 |
| CCSER2    | 1.440319 | 2.484507 | 25.24821 | 6.75E-78  | 1.08E-76  | 165.5329 |
| GRID1     | 1.042991 | 0.999648 | 21.60032 | 2.78E-64  | 2.93E-63  | 134.1435 |
| WAPAL     | 1.443542 | 3.433234 | 28.36651 | 4.95E-89  | 1.20E-87  | 191.214  |
| BMPR1A    | 1.003117 | 1.879451 | 18.20263 | 3.37E-51  | 2.56E-50  | 104.003  |
| MMRN2     | 1.366222 | 2.575905 | 19.62205 | 1.08E-56  | 9.34E-56  | 116.6599 |
| SNCG      | 2.918769 | 3.196094 | 21.40704 | 1.52E-63  | 1.57E-62  | 132.4467 |
| ADIRF-AS1 | -1.06609 | 1.988592 | -12.5616 | 1.19E-29  | 5.79E-29  | 54.44861 |
| ADIRF     | 2.09372  | 5.230601 | 17.97536 | 2.56E-50  | 1.91E-49  | 101.9727 |
| GLUD1     | 1.465315 | 5.201835 | 21.9848  | 9.64E-66  | 1.06E-64  | 137.51   |
| ATAD1     | 1.685417 | 3.38377  | 30.46325 | 3.15E-96  | 1.09E-94  | 207.815  |
| PTEN      | 1.117622 | 4.466213 | 16.79228 | 9.96E-46  | 6.76E-45  | 91.40725 |
| RNLS      | 1.203578 | 2.31381  | 22.7183  | 1.63E-68  | 1.94E-67  | 143.8983 |
| ANKRD22   | 1.747877 | 3.096365 | 14.06637 | 2.91E-35  | 1.59E-34  | 67.33562 |
| STAMBPL1  | 1.463301 | 1.954587 | 26.5279  | 1.58E-82  | 2.96E-81  | 176.2113 |
| ACTA2     | 4.23767  | 6.819205 | 33.68578 | 8.04E-107 | 4.99E-105 | 232.2576 |
| FAS       | 2.014288 | 2.540665 | 27.75589 | 6.84E-87  | 1.50E-85  | 186.2769 |
| CH25H     | 1.716616 | 1.408219 | 20.39561 | 1.13E-59  | 1.05E-58  | 123.5247 |
| LIPA      | 2.404816 | 4.166907 | 30.42273 | 4.32E-96  | 1.48E-94  | 207.4994 |
| IFIT2     | 2.212074 | 1.837872 | 31.78663 | 1.20E-100 | 5.20E-99  | 218.0098 |
| IFIT3     | 2.708478 | 2.812887 | 28.57655 | 9.19E-90  | 2.30E-88  | 192.9016 |
| IFIT1     | 2.696801 | 2.849377 | 23.14732 | 3.99E-70  | 4.98E-69  | 147.6123 |
| IFIT5     | 1.612351 | 2.155684 | 28.53246 | 1.31E-89  | 3.25E-88  | 192.5478 |
| SLC16A12  | -2.15068 | 2.052821 | -21.9158 | 1.76E-65  | 1.92E-64  | 136.9068 |
| KIF20B    | 1.249232 | 0.93946  | 29.79394 | 5.88E-94  | 1.82E-92  | 202.5753 |
| RPP30     | 1.574702 | 3.847237 | 29.97156 | 1.46E-94  | 4.64E-93  | 203.9713 |
| ANKRD1    | 1.051667 | 0.962559 | 10.49276 | 2.62E-22  | 1.10E-21  | 37.6112  |
| PCGF5     | 1.278689 | 3.617833 | 23.45502 | 2.82E-71  | 3.63E-70  | 150.2653 |
| SRP9P1    | 1.090493 | 2.199216 | 6.443746 | 4.32E-10  | 1.33E-09  | 9.777547 |
| KIF11     | 1.963139 | 1.204582 | 39.68201 | 4.51E-125 | 8.69E-123 | 274.3765 |
| EXOC6     | 1.128851 | 2.790645 | 17.52597 | 1.42E-48  | 1.02E-47  | 97.95756 |
| MYOF      | 3.719331 | 3.820883 | 42.12877 | 5.24E-132 | 1.79E-129 | 290.3816 |
| CEP55     | 2.654503 | 1.38847  | 42.83605 | 5.85E-134 | 2.41E-131 | 294.8884 |
| RBP4      | 1.625257 | 4.270733 | 11.91936 | 2.56E-27  | 1.19E-26  | 49.09285 |
| HELLS     | 1.570131 | 1.402364 | 32.36989 | 1.45E-102 | 7.01E-101 | 222.4333 |
| CYP2C18   | 3.054566 | 1.595354 | 28.32428 | 6.95E-89  | 1.67E-87  | 190.874  |
| CYP2C9    | 1.827225 | 1.117149 | 16.81133 | 8.40E-46  | 5.71E-45  | 91.57719 |
| MTND4P20  | 1.210455 | 0.691031 | 14.45517 | 9.75E-37  | 5.50E-36  | 70.72514 |
| ACSM6     | -1.00514 | 0.568182 | -14.6876 | 1.27E-37  | 7.31E-37  | 72.76056 |
| PDLIM1    | 2.271425 | 6.327739 | 26.4815  | 2.32E-82  | 4.31E-81  | 175.8274 |
| TCTN3     | 1.328054 | 3.887336 | 25.52548 | 6.59E-79  | 1.09E-77  | 167.8625 |
| ENTPD1    | 2.89553  | 2.484187 | 38.57613 | 7.63E-122 | 1.21E-119 | 266.9249 |

|               |           |           |           |            |            |           |
|---------------|-----------|-----------|-----------|------------|------------|-----------|
| TM9SF3        | 1. 91739  | 5. 072825 | 27. 8681  | 2. 76E-87  | 6. 16E-86  | 187. 1876 |
| PIK3AP1       | 1. 494371 | 3. 223511 | 16. 84432 | 6. 26E-46  | 4. 27E-45  | 91. 87151 |
| RPL13AP5      | 1. 112764 | 6. 308419 | 13. 1645  | 7. 03E-32  | 3. 61E-31  | 59. 56172 |
| PGAM1         | 2. 355231 | 6. 018136 | 31. 74603 | 1. 64E-100 | 7. 03E-99  | 217. 7003 |
| EXOSC1        | 1. 130307 | 4. 566971 | 21. 30691 | 3. 65E-63  | 3. 73E-62  | 131. 5666 |
| ZDHHC16       | 1. 224997 | 4. 100285 | 22. 68129 | 2. 25E-68  | 2. 66E-67  | 143. 577  |
| UBTD1         | 1. 783292 | 3. 005189 | 27. 68909 | 1. 18E-86  | 2. 56E-85  | 185. 734  |
| PI4K2A        | 2. 038932 | 2. 66644  | 39. 87503 | 1. 25E-125 | 2. 49E-123 | 275. 6629 |
| AVPI1         | 2. 161396 | 3. 126389 | 31. 97956 | 2. 78E-101 | 1. 24E-99  | 219. 4777 |
| MARVELD1      | 3. 286432 | 3. 523745 | 40. 74045 | 4. 16E-128 | 9. 95E-126 | 281. 3803 |
| SFRP5         | -1. 31421 | 4. 770578 | -7. 42766 | 1. 03E-12  | 3. 42E-12  | 15. 71867 |
| CRTAC1        | 1. 216892 | 1. 039313 | 16. 97589 | 1. 93E-46  | 1. 33E-45  | 93. 04548 |
| R3HCC1L       | 1. 190683 | 2. 777113 | 24. 37137 | 1. 12E-74  | 1. 61E-73  | 158. 1098 |
| LOXL4         | 1. 503913 | 2. 448855 | 15. 10017 | 3. 36E-39  | 1. 99E-38  | 76. 38842 |
| HPS1          | 1. 136992 | 4. 62549  | 19. 02552 | 2. 18E-54  | 1. 79E-53  | 111. 3477 |
| GOT1          | 1. 213106 | 4. 190691 | 18. 06222 | 1. 18E-50  | 8. 86E-50  | 102. 7487 |
| COX15         | 1. 107998 | 3. 526309 | 20. 80062 | 3. 15E-61  | 3. 06E-60  | 127. 1055 |
| DNMBP         | 1. 075448 | 3. 347697 | 14. 74676 | 7. 55E-38  | 4. 37E-37  | 73. 27975 |
| ERLIN1        | 1. 537395 | 3. 21459  | 22. 27416 | 7. 73E-67  | 8. 73E-66  | 140. 0357 |
| CHUK          | 1. 007588 | 2. 665698 | 20. 35392 | 1. 63E-59  | 1. 51E-58  | 123. 1555 |
| BLOC1S2       | 1. 725086 | 4. 195345 | 30. 68643 | 5. 58E-97  | 1. 99E-95  | 209. 5496 |
| SCD           | 3. 409744 | 3. 631592 | 28. 23505 | 1. 42E-88  | 3. 37E-87  | 190. 1549 |
| NDUFB8        | 1. 761822 | 6. 372586 | 26. 85043 | 1. 11E-83  | 2. 16E-82  | 178. 8725 |
| MRPL43        | 1. 142891 | 5. 54136  | 18. 85049 | 1. 04E-53  | 8. 36E-53  | 109. 7869 |
| LZTS2         | 1. 491236 | 4. 256851 | 20. 93306 | 9. 80E-62  | 9. 64E-61  | 128. 2741 |
| SFXN3         | 1. 982295 | 4. 447734 | 25. 63863 | 2. 56E-79  | 4. 29E-78  | 168. 8107 |
| KAZALD1       | 2. 003338 | 1. 742929 | 27. 48528 | 6. 16E-86  | 1. 30E-84  | 184. 0744 |
| DPCD          | 2. 165605 | 3. 69949  | 35. 70116 | 3. 66E-113 | 3. 35E-111 | 246. 8911 |
| NPM3          | 1. 520423 | 4. 484625 | 23. 53308 | 1. 44E-71  | 1. 87E-70  | 150. 9368 |
| C10orf76      | 1. 179085 | 3. 059999 | 24. 47631 | 4. 58E-75  | 6. 69E-74  | 159. 0026 |
| HPS6          | 1. 483951 | 2. 747764 | 28. 11002 | 3. 90E-88  | 9. 04E-87  | 189. 1457 |
| LDB1          | 1. 166944 | 4. 11329  | 17. 67495 | 3. 75E-49  | 2. 74E-48  | 99. 28861 |
| PPRC1         | 1. 016062 | 3. 932802 | 15. 35743 | 3. 46E-40  | 2. 09E-39  | 78. 65909 |
| NOLC1         | 1. 46189  | 4. 325261 | 21. 88085 | 2. 39E-65  | 2. 60E-64  | 136. 601  |
| NFKB2         | 1. 74158  | 4. 348598 | 22. 04841 | 5. 53E-66  | 6. 10E-65  | 138. 0658 |
| PSD           | 1. 2617   | 2. 552535 | 14. 42951 | 1. 22E-36  | 6. 87E-36  | 70. 50081 |
| CUEDC2        | 1. 291388 | 4. 836834 | 21. 99384 | 8. 91E-66  | 9. 77E-65  | 137. 589  |
| TMEM180       | 1. 248511 | 2. 062629 | 20. 39586 | 1. 13E-59  | 1. 05E-58  | 123. 5269 |
| ACTR1A        | 1. 753896 | 4. 929667 | 29. 02015 | 2. 67E-91  | 7. 24E-90  | 196. 4479 |
| SUFU          | 1. 41953  | 2. 02843  | 30. 45373 | 3. 39E-96  | 1. 17E-94  | 207. 7409 |
| TRIM8         | 1. 234392 | 5. 559351 | 16. 19785 | 1. 99E-43  | 1. 29E-42  | 86. 11209 |
| ARL3          | 1. 522261 | 2. 416886 | 30. 76341 | 3. 08E-97  | 1. 11E-95  | 210. 1465 |
| WBP1L         | 2. 245684 | 3. 674693 | 35. 47063 | 1. 90E-112 | 1. 65E-110 | 245. 2422 |
| C10orf32      | 1. 088507 | 3. 341116 | 19. 41553 | 6. 75E-56  | 5. 74E-55  | 114. 8223 |
| NT5C2         | 1. 444555 | 4. 445787 | 20. 99571 | 5. 64E-62  | 5. 58E-61  | 128. 8265 |
| USMG5         | 1. 293359 | 7. 385681 | 16. 13159 | 3. 59E-43  | 2. 31E-42  | 85. 52291 |
| CALHM2        | 2. 172152 | 3. 162797 | 26. 66974 | 4. 91E-83  | 9. 35E-82  | 177. 3831 |
| CALHM3        | 1. 206592 | 0. 80335  | 11. 93153 | 2. 31E-27  | 1. 08E-26  | 49. 19331 |
| SH3PXD2A      | 2. 160824 | 3. 038069 | 28. 71957 | 2. 93E-90  | 7. 55E-89  | 194. 0476 |
| RP11-416N2. 4 | -1. 36524 | 1. 493903 | -20. 5907 | 2. 01E-60  | 1. 91E-59  | 125. 2509 |
| SH3PXD2A-AS1  | 1. 790864 | 0. 882382 | 22. 19836 | 1. 50E-66  | 1. 68E-65  | 139. 3748 |
| OBFC1         | 1. 526487 | 3. 938937 | 23. 4001  | 4. 53E-71  | 5. 79E-70  | 149. 7925 |
| SLK           | 1. 66026  | 3. 479779 | 23. 79292 | 1. 56E-72  | 2. 08E-71  | 153. 1679 |
| COL17A1       | 5. 861074 | 2. 960309 | 37. 45242 | 1. 68E-118 | 2. 16E-116 | 259. 2098 |

|               |           |           |           |            |            |           |
|---------------|-----------|-----------|-----------|------------|------------|-----------|
| SFR1          | 1. 761226 | 2. 091613 | 33. 1856  | 3. 25E-105 | 1. 84E-103 | 228. 5487 |
| GSTO1         | 2. 349257 | 6. 020419 | 34. 04075 | 5. 92E-108 | 3. 92E-106 | 234. 871  |
| ITPRIP        | 2. 439953 | 2. 63579  | 33. 34089 | 1. 03E-105 | 5. 98E-104 | 229. 7034 |
| YWHAZP5       | 1. 582573 | 0. 868022 | 28. 22407 | 1. 56E-88  | 3. 67E-87  | 190. 0664 |
| ADD3          | 1. 120018 | 4. 705559 | 13. 45606 | 5. 75E-33  | 3. 01E-32  | 62. 05985 |
| SMNDC1        | 1. 447218 | 3. 179549 | 24. 10931 | 1. 04E-73  | 1. 45E-72  | 155. 8752 |
| DUSP5         | 2. 872156 | 3. 128613 | 27. 21426 | 5. 62E-85  | 1. 14E-83  | 181. 8596 |
| SMC3          | 1. 105204 | 3. 520166 | 18. 33375 | 1. 04E-51  | 8. 04E-51  | 105. 1742 |
| RBM20         | -3. 00361 | 1. 822727 | -26. 5639 | 1. 18E-82  | 2. 21E-81  | 176. 5087 |
| PDCD4         | -1. 98865 | 7. 349005 | -18. 6203 | 8. 08E-53  | 6. 38E-52  | 107. 7331 |
| RP11-348N5. 9 | -1. 3217  | 1. 164727 | -22. 5801 | 5. 41E-68  | 6. 32E-67  | 142. 698  |
| RP11-348N5. 7 | -1. 3026  | 1. 123811 | -21. 4641 | 9. 19E-64  | 9. 56E-63  | 132. 9478 |
| SHOC2         | 1. 614477 | 3. 29792  | 31. 06013 | 3. 12E-98  | 1. 19E-96  | 212. 4403 |
| ACSL5         | 4. 229701 | 3. 471694 | 44. 3479  | 4. 66E-138 | 2. 50E-135 | 304. 348  |
| ZDHHC6        | 1. 091105 | 4. 144334 | 18. 88561 | 7. 58E-54  | 6. 13E-53  | 110. 1001 |
| VTI1A         | 1. 188575 | 2. 406077 | 27. 21665 | 5. 52E-85  | 1. 12E-83  | 181. 8792 |
| TCF7L2        | 1. 539978 | 3. 328127 | 22. 0685  | 4. 64E-66  | 5. 13E-65  | 138. 2413 |
| CASP7         | 1. 302761 | 3. 775328 | 19. 23389 | 3. 40E-55  | 2. 85E-54  | 113. 2048 |
| VWA2          | 1. 477894 | 1. 632577 | 20. 01363 | 3. 33E-58  | 2. 99E-57  | 120. 1387 |
| AFAP1L2       | 1. 116207 | 3. 265402 | 12. 69104 | 3. 97E-30  | 1. 96E-29  | 55. 54014 |
| ABLIM1        | 1. 758291 | 4. 076045 | 22. 88048 | 4. 01E-69  | 4. 84E-68  | 145. 3043 |
| TRUB1         | 1. 282393 | 2. 174787 | 26. 11476 | 4. 84E-81  | 8. 58E-80  | 172. 7845 |
| PNLIP         | -8. 21055 | 9. 612442 | -19. 652  | 8. 25E-57  | 7. 18E-56  | 116. 9257 |
| PNLIPRP1      | -7. 94004 | 7. 549699 | -27. 4503 | 8. 20E-86  | 1. 73E-84  | 183. 7889 |
| PNLIPRP2      | -7. 07344 | 7. 203525 | -22. 9315 | 2. 58E-69  | 3. 13E-68  | 145. 7458 |
| PDZD8         | 1. 179781 | 3. 077301 | 14. 44904 | 1. 03E-36  | 5. 80E-36  | 70. 67161 |
| FAM204A       | 1. 346711 | 4. 351557 | 24. 32283 | 1. 69E-74  | 2. 41E-73  | 157. 6964 |
| CACUL1        | 1. 076712 | 2. 471034 | 22. 59561 | 4. 73E-68  | 5. 53E-67  | 142. 833  |
| P11-215A21.   | 1. 55012  | 1. 109025 | 35. 92396 | 7. 51E-114 | 7. 26E-112 | 248. 4785 |
| FAM45A        | 1. 435055 | 3. 439931 | 26. 46243 | 2. 72E-82  | 5. 04E-81  | 175. 6695 |
| PRDX3         | 1. 517166 | 5. 548637 | 23. 63226 | 6. 16E-72  | 8. 05E-71  | 151. 7892 |
| GRK5          | 2. 21313  | 2. 554172 | 31. 53077 | 8. 45E-100 | 3. 48E-98  | 216. 0558 |
| RGS10         | 3. 759826 | 3. 466976 | 50. 33293 | 2. 45E-153 | 4. 12E-150 | 339. 6163 |
| BAG3          | 2. 202639 | 3. 988074 | 28. 26455 | 1. 12E-88  | 2. 67E-87  | 190. 3928 |
| INPP5F        | 1. 679836 | 2. 380952 | 30. 52421 | 1. 96E-96  | 6. 81E-95  | 208. 2895 |
| MCMBP         | 1. 645466 | 3. 730594 | 26. 71014 | 3. 52E-83  | 6. 74E-82  | 177. 7164 |
| SEC23IP       | 1. 732154 | 3. 312028 | 28. 62588 | 6. 19E-90  | 1. 57E-88  | 193. 2972 |
| PPAPDC1A      | 3. 593828 | 1. 799186 | 35. 46156 | 2. 02E-112 | 1. 75E-110 | 245. 1772 |
| RP11-95I16. 6 | 1. 003993 | 0. 538259 | 9. 968799 | 1. 53E-20  | 6. 17E-20  | 33. 56802 |
| ATE1          | 1. 422255 | 2. 313898 | 26. 61826 | 7. 50E-83  | 1. 42E-81  | 176. 9581 |
| TACC2         | 1. 206109 | 3. 700218 | 17. 3173  | 9. 17E-48  | 6. 48E-47  | 96. 09361 |
| BTBD16        | 1. 172424 | 0. 701231 | 18. 74259 | 2. 71E-53  | 2. 16E-52  | 108. 8242 |
| PLEKHA1       | 1. 283056 | 3. 714762 | 18. 03725 | 1. 47E-50  | 1. 11E-49  | 102. 5256 |
| HTRA1         | 3. 224879 | 5. 738184 | 32. 41012 | 1. 07E-102 | 5. 20E-101 | 222. 7368 |
| DMBT1         | 4. 152038 | 2. 610477 | 21. 82104 | 4. 03E-65  | 4. 35E-64  | 136. 0775 |
| CUZD1         | -6. 68066 | 6. 548944 | -26. 9082 | 6. 91E-84  | 1. 36E-82  | 179. 3476 |
| BUB3          | 1. 743683 | 4. 598809 | 27. 82859 | 3. 79E-87  | 8. 42E-86  | 186. 8671 |
| CPXM2         | 2. 631013 | 2. 296114 | 28. 55811 | 1. 06E-89  | 2. 66E-88  | 192. 7537 |
| CHST15        | 1. 615572 | 2. 884306 | 21. 35052 | 2. 49E-63  | 2. 56E-62  | 131. 9499 |
| OAT           | 2. 045146 | 4. 439868 | 26. 1561  | 3. 43E-81  | 6. 12E-80  | 173. 1283 |
| LHPP          | 2. 008909 | 3. 11081  | 36. 31636 | 4. 68E-115 | 4. 87E-113 | 251. 26   |
| FAM53B        | 1. 147121 | 2. 433378 | 18. 16426 | 4. 74E-51  | 3. 60E-50  | 103. 6603 |
| FAM175B       | 1. 502984 | 2. 337017 | 33. 29144 | 1. 48E-105 | 8. 56E-104 | 229. 336  |
| CTBP2         | 1. 309328 | 4. 340964 | 20. 10766 | 1. 45E-58  | 1. 31E-57  | 120. 9729 |

|               |           |           |           |            |            |           |
|---------------|-----------|-----------|-----------|------------|------------|-----------|
| UROS          | 1. 21784  | 4. 313236 | 21. 47595 | 8. 28E-64  | 8. 62E-63  | 133. 0519 |
| BCCIP         | 1. 266532 | 4. 562299 | 24. 21028 | 4. 40E-74  | 6. 21E-73  | 156. 7371 |
| DHX32         | 1. 031942 | 3. 793811 | 19. 53095 | 2. 42E-56  | 2. 08E-55  | 115. 8495 |
| FANK1         | 1. 337401 | 2. 185002 | 21. 61455 | 2. 46E-64  | 2. 59E-63  | 134. 2683 |
| ADAM12        | 2. 602506 | 1. 356538 | 26. 2309  | 1. 85E-81  | 3. 32E-80  | 173. 7498 |
| DOCK1         | 1. 339299 | 3. 383286 | 22. 77155 | 1. 03E-68  | 1. 23E-67  | 144. 3602 |
| CLRN3         | 2. 99538  | 1. 56766  | 26. 1587  | 3. 36E-81  | 5. 99E-80  | 173. 1499 |
| PTPRE         | 2. 314184 | 2. 044329 | 37. 25208 | 6. 73E-118 | 8. 28E-116 | 257. 8189 |
| MKI67         | 3. 049675 | 1. 64392  | 44. 42543 | 2. 89E-138 | 1. 58E-135 | 304. 8268 |
| MGMT          | 1. 346791 | 3. 767985 | 22. 30859 | 5. 73E-67  | 6. 50E-66  | 140. 3358 |
| GLRX3         | 1. 601684 | 4. 924238 | 24. 47086 | 4. 80E-75  | 6. 99E-74  | 158. 9563 |
| BNIP3         | -3. 25167 | 5. 262904 | -24. 6681 | 9. 01E-76  | 1. 34E-74  | 160. 6316 |
| RP11-45A17. 4 | -1. 70597 | 2. 144735 | -18. 2964 | 1. 46E-51  | 1. 12E-50  | 104. 8406 |
| RP11-45A17. 4 | -1. 52114 | 0. 927189 | -22. 6871 | 2. 14E-68  | 2. 53E-67  | 143. 6275 |
| STK32C        | 1. 545489 | 2. 632508 | 27. 32261 | 2. 32E-85  | 4. 80E-84  | 182. 7461 |
| LRRC27        | 1. 054267 | 2. 351979 | 21. 85148 | 3. 09E-65  | 3. 34E-64  | 136. 344  |
| INPP5A        | 1. 436325 | 3. 217056 | 27. 20857 | 5. 89E-85  | 1. 20E-83  | 181. 813  |
| ADAM8         | 3. 254102 | 3. 35949  | 36. 5695  | 7. 89E-116 | 8. 66E-114 | 253. 0446 |
| TUBGCP2       | 1. 230379 | 4. 792027 | 18. 34225 | 9. 67E-52  | 7. 46E-51  | 105. 2501 |
| ZNF511        | 1. 430852 | 4. 216315 | 24. 52212 | 3. 11E-75  | 4. 56E-74  | 159. 3919 |
| PRAP1         | 3. 523967 | 1. 848658 | 23. 52877 | 1. 50E-71  | 1. 94E-70  | 150. 8998 |
| FUOM          | 1. 103538 | 3. 57428  | 11. 8567  | 4. 30E-27  | 2. 00E-26  | 48. 57579 |
| ECHS1         | 1. 64394  | 5. 514693 | 26. 20191 | 2. 35E-81  | 4. 21E-80  | 173. 509  |
| CYP2E1        | -1. 12679 | 2. 185857 | -15. 7354 | 1. 21E-41  | 7. 56E-41  | 82. 00515 |
| RIC8A         | 1. 548023 | 5. 016492 | 23. 5092  | 1. 77E-71  | 2. 29E-70  | 150. 7315 |
| PSMD13        | 1. 791368 | 6. 013525 | 26. 88191 | 8. 57E-84  | 1. 68E-82  | 179. 1316 |
| RP11-326C3. 4 | -4. 08557 | 5. 87821  | -22. 3553 | 3. 82E-67  | 4. 36E-66  | 140. 7423 |
| ATHL1         | -3. 15489 | 6. 929096 | -19. 4083 | 7. 20E-56  | 6. 12E-55  | 114. 7583 |
| IFITM5        | -1. 36846 | 0. 800478 | -14. 3419 | 2. 62E-36  | 1. 47E-35  | 69. 73596 |
| IFITM2        | 2. 549425 | 7. 407781 | 22. 7097  | 1. 76E-68  | 2. 08E-67  | 143. 8237 |
| IFITM1        | 2. 978302 | 6. 308268 | 25. 93999 | 2. 07E-80  | 3. 59E-79  | 171. 3289 |
| IFITM3        | 2. 462561 | 8. 693154 | 20. 26081 | 3. 72E-59  | 3. 41E-58  | 122. 3307 |
| PKP3          | 2. 241995 | 4. 775133 | 24. 72905 | 5. 38E-76  | 8. 09E-75  | 161. 148  |
| SIGIRR        | 1. 143433 | 5. 2942   | 14. 5737  | 3. 45E-37  | 1. 97E-36  | 71. 76241 |
| RNH1          | 1. 545739 | 6. 009597 | 21. 97345 | 1. 06E-65  | 1. 16E-64  | 137. 4108 |
| HRAS          | 1. 802919 | 4. 845093 | 24. 91471 | 1. 12E-76  | 1. 72E-75  | 162. 7195 |
| RASSF7        | 1. 296446 | 5. 314766 | 12. 92359 | 5. 50E-31  | 2. 77E-30  | 57. 50972 |
| MIR210HG      | 2. 311945 | 2. 644684 | 19. 21871 | 3. 90E-55  | 3. 25E-54  | 113. 0695 |
| IRF7          | 2. 06341  | 3. 889069 | 18. 84692 | 1. 07E-53  | 8. 63E-53  | 109. 7549 |
| CDHR5         | 2. 740965 | 2. 119577 | 23. 02366 | 1. 16E-69  | 1. 42E-68  | 146. 5436 |
| SCT           | 1. 744373 | 0. 997459 | 22. 14827 | 2. 31E-66  | 2. 58E-65  | 138. 9377 |
| DEAF1         | 1. 155169 | 3. 970315 | 19. 9168  | 7. 85E-58  | 6. 99E-57  | 119. 2791 |
| TALD01        | 2. 092552 | 6. 255924 | 29. 48931 | 6. 48E-93  | 1. 89E-91  | 200. 172  |
| PDDC1         | 1. 160077 | 3. 899839 | 18. 01059 | 1. 87E-50  | 1. 40E-49  | 102. 2874 |
| RPLP2         | 1. 436731 | 9. 87826  | 14. 64559 | 1. 84E-37  | 1. 05E-36  | 72. 39228 |
| AP006621. 8   | -2. 79631 | 2. 148141 | -34. 3339 | 6. 95E-109 | 4. 92E-107 | 237. 0179 |
| CRACR2B       | -1. 4683  | 6. 163088 | -12. 9033 | 6. 54E-31  | 3. 29E-30  | 57. 33706 |
| CD151         | 1. 525944 | 7. 813875 | 17. 07357 | 8. 08E-47  | 5. 61E-46  | 93. 9173  |
| TSPAN4        | 1. 604374 | 4. 811448 | 21. 24233 | 6. 44E-63  | 6. 55E-62  | 130. 9986 |
| MUC6          | -1. 0745  | 4. 942757 | -5. 22525 | 3. 16E-07  | 8. 67E-07  | 3. 342854 |
| MUC5AC        | 3. 604404 | 1. 913896 | 19. 69186 | 5. 79E-57  | 5. 05E-56  | 117. 2806 |
| MUC5B         | 3. 90913  | 3. 263063 | 20. 52654 | 3. 54E-60  | 3. 35E-59  | 124. 6833 |
| BRSK2         | -4. 2558  | 3. 491197 | -45. 2866 | 1. 49E-140 | 1. 00E-137 | 310. 1051 |
| MOB2          | 1. 443919 | 4. 310026 | 23. 9441  | 4. 27E-73  | 5. 81E-72  | 154. 4629 |

|               |           |           |           |             |              |           |
|---------------|-----------|-----------|-----------|-------------|--------------|-----------|
| IFITM10       | 1. 952878 | 1. 414397 | 23. 7621  | 2. 03E-72   | 2. 70E-71    | 152. 9036 |
| RP11-295K3. 1 | 1. 575369 | 1. 179957 | 20. 45037 | 6. 95E-60   | 6. 50E-59    | 124. 0094 |
| CTSD          | 2. 785    | 8. 293004 | 29. 31928 | 2. 48E-92   | 7. 05E-91    | 198. 8255 |
| SYT8          | 2. 406302 | 4. 39498  | 13. 56673 | 2. 21E-33   | 1. 17E-32    | 63. 01207 |
| TNNI2         | 1. 737679 | 2. 81383  | 11. 67737 | 1. 89E-26   | 8. 65E-26    | 47. 10206 |
| LSP1          | 3. 279927 | 3. 910407 | 31. 46223 | 1. 43E-99   | 5. 81E-98    | 215. 531  |
| IGF2          | 2. 163715 | 3. 09388  | 14. 10704 | 2. 04E-35   | 1. 12E-34    | 67. 68923 |
| AC132217. 4   | 2. 277717 | 3. 913402 | 13. 16392 | 7. 07E-32   | 3. 63E-31    | 59. 55674 |
| INS           | -1. 09452 | 10. 2534  | -3. 06538 | 0. 00236064 | 0. 005143855 | -5. 14952 |
| CD81          | 1. 444773 | 8. 069922 | 15. 86536 | 3. 83E-42   | 2. 41E-41    | 83. 15785 |
| TSSC4         | 1. 541936 | 4. 233768 | 24. 04677 | 1. 78E-73   | 2. 45E-72    | 155. 341  |
| CDKN1C        | 1. 184026 | 3. 899412 | 12. 87598 | 8. 25E-31   | 4. 14E-30    | 57. 10557 |
| SLC22A18AS    | 2. 33061  | 1. 232166 | 32. 3     | 2. 46E-102  | 1. 18E-100   | 221. 9055 |
| SLC22A18      | 2. 384448 | 4. 163276 | 17. 87823 | 6. 10E-50   | 4. 52E-49    | 101. 1049 |
| PHLDA2        | 4. 31044  | 3. 351041 | 30. 66067 | 6. 81E-97   | 2. 42E-95    | 209. 3498 |
| NAP1L4        | 1. 676789 | 5. 10486  | 25. 69764 | 1. 56E-79   | 2. 64E-78    | 169. 3046 |
| CARS          | 1. 291671 | 4. 251925 | 21. 27345 | 4. 90E-63   | 5. 00E-62    | 131. 2723 |
| OSBPL5        | 1. 382046 | 3. 357804 | 19. 4073  | 7. 27E-56   | 6. 17E-55    | 114. 7491 |
| NUP98         | 1. 378736 | 4. 208441 | 22. 23758 | 1. 06E-66   | 1. 20E-65    | 139. 7168 |
| RHOG          | 2. 429749 | 4. 749708 | 36. 54871 | 9. 13E-116  | 9. 99E-114   | 252. 8983 |
| STIM1         | 1. 182559 | 3. 895238 | 18. 78916 | 1. 79E-53   | 1. 43E-52    | 109. 2396 |
| RRM1          | 1. 685637 | 3. 513328 | 29. 67647 | 1. 48E-93   | 4. 46E-92    | 201. 6499 |
| TRIM21        | 1. 978087 | 3. 164591 | 33. 91398 | 1. 50E-107  | 9. 70E-106   | 233. 9394 |
| TRIM34        | 1. 528918 | 1. 902284 | 29. 87104 | 3. 21E-94   | 1. 00E-92    | 203. 1817 |
| TRIM22        | 2. 114134 | 3. 771074 | 21. 97193 | 1. 08E-65   | 1. 18E-64    | 137. 3975 |
| CCKBR         | -1. 56283 | 1. 310025 | -16. 537  | 9. 71E-45   | 6. 45E-44    | 89. 13116 |
| PRKCDBP       | 1. 772321 | 4. 378737 | 19. 83654 | 1. 60E-57   | 1. 42E-56    | 118. 5663 |
| SMPD1         | 1. 247641 | 4. 34341  | 18. 78473 | 1. 86E-53   | 1. 49E-52    | 109. 2002 |
| RRP8          | 1. 245891 | 3. 342673 | 24. 33874 | 1. 48E-74   | 2. 11E-73    | 157. 832  |
| ILK           | 1. 091496 | 6. 173113 | 14. 67508 | 1. 42E-37   | 8. 15E-37    | 72. 65082 |
| TAF10         | 1. 097042 | 6. 747572 | 14. 17377 | 1. 14E-35   | 6. 29E-35    | 68. 26988 |
| TPP1          | 1. 829766 | 5. 051651 | 25. 61128 | 3. 22E-79   | 5. 38E-78    | 168. 5816 |
| DCHS1         | 1. 044391 | 1. 645025 | 15. 28742 | 6. 42E-40   | 3. 87E-39    | 78. 04053 |
| P11-732A19.   | 1. 596509 | 2. 244018 | 19. 04415 | 1. 84E-54   | 1. 52E-53    | 111. 5138 |
| MRPL17        | 2. 108303 | 4. 856886 | 35. 63507 | 5. 86E-113  | 5. 31E-111   | 246. 419  |
| OLFML1        | 2. 075342 | 1. 867685 | 25. 66868 | 1. 99E-79   | 3. 34E-78    | 169. 0622 |
| PPFIBP2       | 1. 309299 | 3. 279784 | 18. 24516 | 2. 30E-51   | 1. 76E-50    | 104. 3829 |
| CYB5R2        | 2. 343948 | 2. 478637 | 35. 23802 | 1. 00E-111  | 8. 47E-110   | 243. 572  |
| RIC3          | -2. 39117 | 2. 773494 | -27. 545  | 3. 79E-86   | 8. 09E-85    | 184. 5616 |
| RPL27A        | 1. 403431 | 10. 66144 | 13. 82776 | 2. 31E-34   | 1. 25E-33    | 65. 26601 |
| ST5           | 1. 578405 | 4. 828795 | 22. 02253 | 6. 93E-66   | 7. 63E-65    | 137. 8397 |
| P11-152H18.   | 1. 563823 | 2. 661245 | 10. 45317 | 3. 57E-22   | 1. 49E-21    | 37. 30206 |
| AKIP1         | 1. 653183 | 3. 313481 | 29. 11453 | 1. 26E-91   | 3. 47E-90    | 197. 1993 |
| TMEM9B        | 1. 582133 | 4. 724431 | 26. 21608 | 2. 09E-81   | 3. 75E-80    | 173. 6267 |
| IPO7          | 1. 337908 | 4. 009735 | 18. 98357 | 3. 16E-54   | 2. 58E-53    | 110. 9737 |
| ZNF143        | 1. 141902 | 2. 963826 | 19. 93018 | 6. 97E-58   | 6. 21E-57    | 119. 398  |
| WEE1          | 1. 875286 | 2. 849227 | 23. 88019 | 7. 37E-73   | 9. 97E-72    | 153. 9157 |
| RPL23AP65     | 1. 297029 | 1. 24914  | 15. 9433  | 1. 91E-42   | 1. 21E-41    | 83. 84977 |
| SWAP70        | 1. 980252 | 3. 11706  | 28. 77775 | 1. 84E-90   | 4. 79E-89    | 194. 5131 |
| SBF2          | 1. 428608 | 2. 76406  | 22. 35957 | 3. 68E-67   | 4. 20E-66    | 140. 7798 |
| ADM           | 2. 098123 | 3. 640494 | 16. 02997 | 8. 86E-43   | 5. 66E-42    | 84. 61963 |
| AMPD3         | 1. 353224 | 2. 076925 | 13. 09002 | 1. 33E-31   | 6. 78E-31    | 58. 92606 |
| RNF141        | 1. 520095 | 3. 066154 | 26. 13134 | 4. 22E-81   | 7. 49E-80    | 172. 9224 |
| MRVI1         | 2. 148441 | 2. 145445 | 24. 92142 | 1. 06E-76   | 1. 63E-75    | 162. 7762 |

|             |           |           |           |            |            |           |
|-------------|-----------|-----------|-----------|------------|------------|-----------|
| CTR9        | 1. 101095 | 3. 130116 | 19. 60562 | 1. 25E-56  | 1. 08E-55  | 116. 5137 |
| EIF4G2      | 1. 779258 | 7. 110898 | 21. 89017 | 2. 20E-65  | 2. 40E-64  | 136. 6825 |
| GALNT18     | 1. 508429 | 2. 542275 | 22. 63838 | 3. 26E-68  | 3. 84E-67  | 143. 2046 |
| DKK3        | 3. 587552 | 4. 267192 | 37. 56155 | 7. 91E-119 | 1. 04E-116 | 259. 9654 |
| MICAL2      | 2. 41769  | 3. 727873 | 30. 58892 | 1. 19E-96  | 4. 18E-95  | 208. 7925 |
| P11-265D17. | 1. 904899 | 2. 295952 | 19. 70485 | 5. 16E-57  | 4. 51E-56  | 117. 3961 |
| PARVA       | 1. 253701 | 4. 161772 | 19. 38831 | 8. 61E-56  | 7. 29E-55  | 114. 58   |
| TEAD1       | 1. 415506 | 2. 788553 | 18. 8847  | 7. 64E-54  | 6. 18E-53  | 110. 0919 |
| BTBD10      | 2. 123663 | 3. 134451 | 36. 88942 | 8. 40E-117 | 9. 67E-115 | 255. 2891 |
| SPON1       | 2. 718001 | 2. 839431 | 24. 12651 | 8. 99E-74  | 1. 26E-72  | 156. 0221 |
| RRAS2       | 1. 338295 | 3. 600112 | 20. 93125 | 9. 96E-62  | 9. 79E-61  | 128. 2582 |
| COPB1       | 1. 244146 | 5. 151435 | 19. 47693 | 3. 91E-56  | 3. 35E-55  | 115. 3688 |
| PSMA1       | 1. 60246  | 5. 874379 | 23. 29185 | 1. 15E-70  | 1. 45E-69  | 148. 8596 |
| C11orf58    | 1. 649628 | 5. 843441 | 21. 79891 | 4. 89E-65  | 5. 27E-64  | 135. 8838 |
| PLEKHA7     | 1. 35967  | 3. 618521 | 17. 28039 | 1. 27E-47  | 8. 99E-47  | 95. 76395 |
| OR7E14P     | 1. 646924 | 1. 971652 | 23. 48965 | 2. 10E-71  | 2. 70E-70  | 150. 5633 |
| USH1C       | 3. 741717 | 3. 630598 | 33. 5598  | 2. 03E-106 | 1. 23E-104 | 231. 3263 |
| SERGEF      | 1. 117084 | 4. 381552 | 19. 09663 | 1. 16E-54  | 9. 55E-54  | 111. 9816 |
| SAA2-SAA4   | 1. 067484 | 0. 59232  | 14. 6888  | 1. 26E-37  | 7. 24E-37  | 72. 77115 |
| SAA2        | 2. 231858 | 2. 903445 | 12. 96979 | 3. 71E-31  | 1. 87E-30  | 57. 90234 |
| SAA1        | 2. 649625 | 4. 102968 | 14. 07427 | 2. 71E-35  | 1. 49E-34  | 67. 40433 |
| HPS5        | 1. 164753 | 2. 356417 | 19. 9398  | 6. 40E-58  | 5. 71E-57  | 119. 4834 |
| GTF2H1      | 1. 014285 | 3. 662893 | 18. 15375 | 5. 21E-51  | 3. 94E-50  | 103. 5664 |
| LDHA        | 3. 001431 | 7. 541981 | 25. 77821 | 7. 97E-80  | 1. 36E-78  | 169. 9783 |
| TSG101      | 1. 967609 | 5. 081679 | 30. 61949 | 9. 37E-97  | 3. 31E-95  | 209. 03   |
| UEVLD       | 1. 423431 | 2. 350759 | 27. 07253 | 1. 79E-84  | 3. 59E-83  | 180. 6978 |
| SPTY2D1     | 1. 436891 | 2. 370159 | 26. 5743  | 1. 08E-82  | 2. 03E-81  | 176. 5949 |
| TMEM86A     | 1. 324066 | 1. 646915 | 27. 74141 | 7. 69E-87  | 1. 69E-85  | 186. 1593 |
| ZDHHC13     | 1. 596403 | 2. 935747 | 27. 6862  | 1. 20E-86  | 2. 62E-85  | 185. 7105 |
| E2F8        | 1. 184645 | 0. 626005 | 28. 27866 | 1. 00E-88  | 2. 39E-87  | 190. 5064 |
| HTATIP2     | 2. 622468 | 4. 670054 | 32. 87204 | 3. 36E-104 | 1. 79E-102 | 226. 2077 |
| SVIP        | 1. 283855 | 3. 7053   | 20. 23465 | 4. 69E-59  | 4. 29E-58  | 122. 0989 |
| FIBIN       | 2. 125638 | 2. 282019 | 20. 8292  | 2. 45E-61  | 2. 39E-60  | 127. 3578 |
| BBOX1-AS1   | 1. 048208 | 0. 521472 | 11. 487   | 8. 99E-26  | 4. 06E-25  | 45. 54753 |
| CCDC34      | 1. 147152 | 2. 264549 | 21. 26045 | 5. 50E-63  | 5. 60E-62  | 131. 158  |
| KIF18A      | 1. 032412 | 0. 590293 | 25. 08555 | 2. 65E-77  | 4. 16E-76  | 164. 1622 |
| ARL14EP     | 1. 074969 | 2. 997496 | 20. 88378 | 1. 51E-61  | 1. 48E-60  | 127. 8395 |
| RCN1        | 2. 963245 | 4. 654446 | 38. 46938 | 1. 58E-121 | 2. 46E-119 | 266. 1982 |
| EIF3M       | 1. 141623 | 7. 149664 | 14. 19014 | 9. 88E-36  | 5. 45E-35  | 68. 41246 |
| PRRG4       | 1. 947038 | 1. 788401 | 30. 25879 | 1. 55E-95  | 5. 14E-94  | 206. 2204 |
| HIPK3       | 1. 189139 | 3. 314165 | 18. 16182 | 4. 85E-51  | 3. 67E-50  | 103. 6385 |
| KIAA1549L   | 1. 108022 | 0. 705445 | 20. 5115  | 4. 05E-60  | 3. 82E-59  | 124. 5503 |
| CD59        | 2. 667241 | 7. 436939 | 30. 36994 | 6. 51E-96  | 2. 20E-94  | 207. 0879 |
| LMO2        | 1. 926344 | 2. 740435 | 25. 94077 | 2. 06E-80  | 3. 57E-79  | 171. 3354 |
| CAPRIN1     | 1. 79397  | 5. 2779   | 26. 82756 | 1. 34E-83  | 2. 60E-82  | 178. 6842 |
| NAT10       | 1. 04358  | 3. 762267 | 18. 84186 | 1. 12E-53  | 9. 02E-53  | 109. 7099 |
| ABTB2       | 1. 771958 | 1. 707543 | 26. 60219 | 8. 57E-83  | 1. 62E-81  | 176. 8254 |
| EHF         | 1. 821402 | 3. 718126 | 18. 67067 | 5. 16E-53  | 4. 09E-52  | 108. 1823 |
| PDHX        | 1. 089257 | 3. 102035 | 21. 33229 | 2. 92E-63  | 3. 00E-62  | 131. 7898 |
| SLC1A2      | -1. 64049 | 1. 210306 | -29. 8332 | 4. 32E-94  | 1. 34E-92  | 202. 884  |
| PAMR1       | 1. 732506 | 1. 760567 | 21. 58647 | 3. 14E-64  | 3. 31E-63  | 134. 022  |
| FJX1        | 1. 471955 | 2. 018182 | 18. 29013 | 1. 54E-51  | 1. 18E-50  | 104. 7846 |
| LDLRAD3     | 1. 038364 | 1. 776382 | 16. 74569 | 1. 51E-45  | 1. 02E-44  | 90. 99173 |
| COMMD9      | 1. 667234 | 4. 768366 | 27. 80844 | 4. 47E-87  | 9. 87E-86  | 186. 7036 |

|              |          |          |          |           |           |          |
|--------------|----------|----------|----------|-----------|-----------|----------|
| PRR5L        | 3.000301 | 2.199682 | 42.26366 | 2.21E-132 | 7.83E-130 | 291.2452 |
| API5         | 1.15389  | 4.307115 | 19.97484 | 4.69E-58  | 4.19E-57  | 119.7944 |
| HSD17B12     | 1.808185 | 4.570659 | 27.28461 | 3.17E-85  | 6.51E-84  | 182.4353 |
| C11orf96     | 1.833006 | 4.693256 | 12.10612 | 5.41E-28  | 2.57E-27  | 50.63983 |
| EXT2         | 1.573752 | 4.200914 | 26.43853 | 3.31E-82  | 6.12E-81  | 175.4717 |
| CD82         | 3.105907 | 4.983185 | 38.36088 | 3.30E-121 | 5.05E-119 | 265.4583 |
| TSPAN18      | 2.109159 | 1.706552 | 28.87085 | 8.75E-91  | 2.31E-89  | 195.2571 |
| TP53I11      | 1.300776 | 4.631062 | 16.29453 | 8.42E-44  | 5.48E-43  | 86.97232 |
| SYT13        | 3.141379 | 2.561597 | 29.09072 | 1.52E-91  | 4.18E-90  | 197.0098 |
| CHST1        | 1.624573 | 1.436351 | 26.58215 | 1.01E-82  | 1.90E-81  | 176.6598 |
| SLC35C1      | 1.860077 | 3.42574  | 29.99771 | 1.19E-94  | 3.80E-93  | 204.1765 |
| MAPK8IP1     | -1.4694  | 3.37123  | -19.3414 | 1.31E-55  | 1.10E-54  | 114.1628 |
| GYLTL1B      | -1.11761 | 3.235177 | -12.3124 | 9.65E-29  | 4.64E-28  | 52.35895 |
| CREB3L1      | 1.269932 | 5.391914 | 11.47676 | 9.77E-26  | 4.41E-25  | 45.46419 |
| MDK          | 4.977709 | 5.933495 | 44.98115 | 9.59E-140 | 5.92E-137 | 308.2413 |
| AMBRA1       | 1.642809 | 2.897128 | 29.63808 | 2.00E-93  | 6.00E-92  | 201.3471 |
| ARHGAP1      | 2.12082  | 4.935736 | 29.5832  | 3.09E-93  | 9.18E-92  | 200.914  |
| ZNF408       | 1.448343 | 2.433352 | 28.86105 | 9.46E-91  | 2.50E-89  | 195.1788 |
| CKAP5        | 1.743904 | 3.610812 | 27.00331 | 3.16E-84  | 6.29E-83  | 180.1296 |
| C11orf49     | 1.79705  | 3.867072 | 31.35387 | 3.27E-99  | 1.30E-97  | 214.7001 |
| NR1H3        | 1.622185 | 4.403086 | 22.19277 | 1.57E-66  | 1.76E-65  | 139.326  |
| SPI1         | 2.792718 | 3.162275 | 27.82388 | 3.94E-87  | 8.74E-86  | 186.8289 |
| SLC39A13     | 1.036307 | 4.736604 | 14.4873  | 7.35E-37  | 4.16E-36  | 71.00617 |
| PSMC3        | 1.714618 | 5.805255 | 26.72215 | 3.19E-83  | 6.11E-82  | 177.8155 |
| NDUFS3       | 1.614113 | 5.693708 | 26.46176 | 2.73E-82  | 5.06E-81  | 175.664  |
| PTPMT1       | 1.273873 | 4.808552 | 23.05736 | 8.68E-70  | 1.07E-68  | 146.835  |
| KBTBD4       | 1.400486 | 2.695174 | 22.81664 | 6.96E-69  | 8.34E-68  | 144.7511 |
| MTCH2        | 2.198636 | 4.703079 | 35.33201 | 5.12E-112 | 4.37E-110 | 244.2477 |
| PTPRJ        | 1.72642  | 2.535143 | 30.878   | 1.27E-97  | 4.68E-96  | 211.0337 |
| FOLH1        | 1.317113 | 0.822992 | 17.88634 | 5.68E-50  | 4.21E-49  | 101.1773 |
| RP11-61N20.5 | 1.469342 | 1.146368 | 30.98872 | 5.40E-98  | 2.03E-96  | 211.8893 |
| APLNR        | 2.907201 | 2.118673 | 29.91496 | 2.28E-94  | 7.14E-93  | 203.5269 |
| TNKS1BP1     | 1.677391 | 5.698171 | 21.25979 | 5.53E-63  | 5.63E-62  | 131.1522 |
| SSRP1        | 1.177578 | 5.370857 | 17.74137 | 2.07E-49  | 1.52E-48  | 99.88205 |
| SLC43A3      | 1.769796 | 3.699689 | 21.20757 | 8.75E-63  | 8.86E-62  | 130.6927 |
| SLC43A1      | -2.74684 | 4.937197 | -29.6869 | 1.36E-93  | 4.12E-92  | 201.7323 |
| TIMM10       | 1.829006 | 4.501886 | 29.82622 | 4.57E-94  | 1.41E-92  | 202.8293 |
| UBE2L6       | 2.990373 | 4.717463 | 33.98633 | 8.82E-108 | 5.78E-106 | 234.4713 |
| SERPING1     | 1.999691 | 7.70092  | 17.69437 | 3.16E-49  | 2.30E-48  | 99.46206 |
| CLP1         | 1.310987 | 2.508424 | 26.15202 | 3.55E-81  | 6.33E-80  | 173.0943 |
| ZDHHC5       | 1.97511  | 4.249808 | 34.95489 | 7.70E-111 | 6.14E-109 | 241.5301 |
| MED19        | 1.260469 | 3.200839 | 24.90863 | 1.18E-76  | 1.81E-75  | 162.6681 |
| TMX2         | 1.300023 | 5.281653 | 21.63449 | 2.06E-64  | 2.18E-63  | 134.4431 |
| C11orf31     | 1.235425 | 6.025736 | 17.41687 | 3.77E-48  | 2.69E-47  | 96.983   |
| LPXN         | 1.646423 | 2.847319 | 22.93853 | 2.42E-69  | 2.95E-68  | 145.8069 |
| ZFP91        | 1.32299  | 3.592036 | 21.65585 | 1.71E-64  | 1.81E-63  | 134.6304 |
| FAM111B      | 1.355021 | 0.891873 | 11.91243 | 2.71E-27  | 1.26E-26  | 49.03562 |
| AP001258.4   | 1.089838 | 1.43951  | 24.60487 | 1.54E-75  | 2.28E-74  | 160.0947 |
| FAM111A      | 1.013468 | 3.345344 | 16.3075  | 7.50E-44  | 4.89E-43  | 87.08771 |
| DTX4         | 1.754297 | 2.958233 | 24.82098 | 2.47E-76  | 3.77E-75  | 161.9266 |
| MPEG1        | 2.112095 | 1.815264 | 21.33654 | 2.82E-63  | 2.89E-62  | 131.8271 |
| PATL1        | 1.671777 | 3.218627 | 26.75621 | 2.41E-83  | 4.64E-82  | 178.0964 |
| STX3         | 1.173619 | 3.847864 | 19.20072 | 4.57E-55  | 3.81E-54  | 112.9092 |
| FABP5P7      | 1.462092 | 4.138069 | 15.68234 | 1.94E-41  | 1.20E-40  | 81.53463 |

|             |           |           |           |            |            |           |
|-------------|-----------|-----------|-----------|------------|------------|-----------|
| MRPL16      | 1. 077909 | 4. 512371 | 20. 46429 | 6. 15E-60  | 5. 76E-59  | 124. 1326 |
| TCN1        | 5. 532174 | 3. 76567  | 33. 68404 | 8. 14E-107 | 5. 05E-105 | 232. 2447 |
| MS4A6A      | 3. 002308 | 4. 148697 | 24. 44066 | 6. 21E-75  | 9. 01E-74  | 158. 6994 |
| MS4A4A      | 2. 256518 | 2. 623003 | 20. 95751 | 7. 90E-62  | 7. 79E-61  | 128. 4897 |
| MS4A7       | 2. 14277  | 2. 664066 | 20. 04239 | 2. 58E-58  | 2. 32E-57  | 120. 3939 |
| MS4A1       | 1. 59456  | 1. 00114  | 10. 42354 | 4. 50E-22  | 1. 88E-21  | 37. 07115 |
| MS4A8       | 2. 079193 | 1. 874579 | 16. 99434 | 1. 64E-46  | 1. 13E-45  | 93. 21014 |
| CCDC86      | 1. 230176 | 3. 601191 | 20. 29432 | 2. 77E-59  | 2. 55E-58  | 122. 6276 |
| PRPF19      | 1. 471531 | 5. 274101 | 23. 24447 | 1. 73E-70  | 2. 18E-69  | 148. 4509 |
| TMEM109     | 1. 837523 | 5. 542974 | 27. 39511 | 1. 29E-85  | 2. 69E-84  | 183. 3385 |
| TMEM132A    | 2. 846251 | 3. 165847 | 31. 97379 | 2. 90E-101 | 1. 29E-99  | 219. 4338 |
| SLC15A3     | 3. 921015 | 4. 022834 | 44. 63857 | 7. 80E-139 | 4. 41E-136 | 306. 14   |
| CD6         | 1. 808067 | 1. 316866 | 24. 3974  | 8. 96E-75  | 1. 29E-73  | 158. 3314 |
| CD5         | 1. 504041 | 0. 982435 | 19. 99258 | 4. 01E-58  | 3. 59E-57  | 119. 9519 |
| PGA3        | -2. 17196 | 1. 744708 | -14. 728  | 8. 90E-38  | 5. 15E-37  | 73. 11501 |
| PGA4        | -1. 89499 | 1. 60524  | -12. 846  | 1. 06E-30  | 5. 32E-30  | 56. 85142 |
| DBB1        | 1. 62263  | 5. 627177 | 26. 91966 | 6. 28E-84  | 1. 23E-82  | 179. 4421 |
| CYB561A3    | 1. 395843 | 4. 200801 | 23. 47784 | 2. 32E-71  | 2. 99E-70  | 150. 4617 |
| TMEM138     | 1. 192039 | 4. 519425 | 20. 37671 | 1. 33E-59  | 1. 24E-58  | 123. 3573 |
| TMEM216     | 1. 114996 | 3. 472059 | 21. 13946 | 1. 59E-62  | 1. 60E-61  | 130. 0931 |
| P11-286N22. | 1. 692285 | 3. 847455 | 24. 83924 | 2. 12E-76  | 3. 23E-75  | 162. 0811 |
| SDHAF2      | 1. 722597 | 4. 251705 | 31. 91654 | 4. 48E-101 | 1. 97E-99  | 218. 9987 |
| RPLPOP2     | 2. 100124 | 1. 199168 | 28. 5949  | 7. 93E-90  | 2. 00E-88  | 193. 0488 |
| MYRF        | 1. 165938 | 4. 599499 | 11. 81539 | 6. 05E-27  | 2. 80E-26  | 48. 23558 |
| FEN1        | 2. 04429  | 2. 653187 | 35. 51369 | 1. 39E-112 | 1. 22E-110 | 245. 5507 |
| FADS2       | 2. 238668 | 3. 179974 | 22. 64678 | 3. 03E-68  | 3. 57E-67  | 143. 2775 |
| FADS1       | 1. 175262 | 2. 414337 | 15. 37419 | 2. 98E-40  | 1. 81E-39  | 78. 80719 |
| RAB3IL1     | 1. 889692 | 2. 552961 | 24. 15117 | 7. 29E-74  | 1. 02E-72  | 156. 2327 |
| FTH1        | 1. 274997 | 11. 08917 | 11. 49164 | 8. 66E-26  | 3. 91E-25  | 45. 58525 |
| INCENP      | 1. 428386 | 2. 307053 | 25. 17818 | 1. 22E-77  | 1. 93E-76  | 164. 9432 |
| SCGB2A1     | 1. 513565 | 2. 548558 | 12. 13745 | 4. 17E-28  | 1. 98E-27  | 50. 90024 |
| AHNAK       | 2. 794599 | 4. 980708 | 30. 56298 | 1. 45E-96  | 5. 08E-95  | 208. 5909 |
| EEF1G       | 1. 153685 | 9. 931819 | 12. 3748  | 5. 71E-29  | 2. 76E-28  | 52. 88077 |
| MTA2        | 1. 871388 | 4. 55327  | 30. 99821 | 5. 02E-98  | 1. 90E-96  | 211. 9625 |
| EML3        | 1. 026265 | 4. 589178 | 14. 30217 | 3. 72E-36  | 2. 07E-35  | 69. 38894 |
| ROM1        | 1. 185077 | 1. 793155 | 21. 29359 | 4. 11E-63  | 4. 19E-62  | 131. 4494 |
| B3GAT3      | 1. 392802 | 4. 460586 | 21. 00018 | 5. 43E-62  | 5. 38E-61  | 128. 866  |
| GANAB       | 1. 128452 | 6. 327281 | 15. 41587 | 2. 06E-40  | 1. 25E-39  | 79. 17563 |
| INTS5       | 1. 352009 | 2. 902519 | 27. 70742 | 1. 01E-86  | 2. 21E-85  | 185. 8831 |
| C11orf98    | 2. 080051 | 5. 242442 | 31. 52607 | 8. 76E-100 | 3. 60E-98  | 216. 0199 |
| UQCC3       | 1. 351563 | 2. 806126 | 24. 14955 | 7. 39E-74  | 1. 03E-72  | 156. 2188 |
| UBXN1       | 1. 309635 | 6. 335342 | 17. 44581 | 2. 91E-48  | 2. 08E-47  | 97. 24147 |
| LRRN4CL     | 1. 06827  | 0. 992993 | 16. 27905 | 9. 66E-44  | 6. 29E-43  | 86. 83451 |
| BSCL2       | 1. 689025 | 5. 360557 | 22. 41897 | 2. 19E-67  | 2. 52E-66  | 141. 297  |
| HNRNPUL2    | 1. 363705 | 4. 477005 | 24. 05377 | 1. 67E-73  | 2. 31E-72  | 155. 4007 |
| TTC9C       | 1. 507655 | 3. 966933 | 25. 74277 | 1. 07E-79  | 1. 82E-78  | 169. 6821 |
| POLR2G      | 1. 896117 | 5. 249905 | 30. 74011 | 3. 68E-97  | 1. 33E-95  | 209. 966  |
| TMEM223     | 1. 161643 | 3. 618257 | 23. 18194 | 2. 96E-70  | 3. 71E-69  | 147. 9112 |
| TMEM179B    | 1. 484229 | 5. 363537 | 23. 78015 | 1. 73E-72  | 2. 32E-71  | 153. 0584 |
| SLC3A2      | 1. 419253 | 6. 081504 | 17. 8203  | 1. 02E-49  | 7. 56E-49  | 100. 5872 |
| HRASLS5     | -1. 04041 | 1. 574274 | -13. 3721 | 1. 18E-32  | 6. 17E-32  | 61. 33892 |
| RARRES3     | 4. 532833 | 4. 578176 | 37. 9425  | 5. 75E-120 | 7. 98E-118 | 262. 5925 |
| HRASLS2     | 2. 702319 | 1. 348199 | 23. 71857 | 2. 94E-72  | 3. 90E-71  | 152. 5302 |
| PLA2G16     | 3. 086751 | 5. 421055 | 34. 10055 | 3. 82E-108 | 2. 57E-106 | 235. 3098 |



|             |          |          |          |           |           |          |
|-------------|----------|----------|----------|-----------|-----------|----------|
| ATL3        | 1.468039 | 3.413437 | 24.49803 | 3.81E-75  | 5.58E-74  | 159.1872 |
| RTN3        | 1.360715 | 5.683678 | 20.88604 | 1.48E-61  | 1.45E-60  | 127.8594 |
| C11orf84    | 1.709925 | 2.776949 | 30.40293 | 5.04E-96  | 1.71E-94  | 207.3451 |
| MARK2       | 1.271477 | 3.85975  | 20.29944 | 2.64E-59  | 2.43E-58  | 122.6729 |
| RCOR2       | 1.064174 | 0.85711  | 22.69158 | 2.06E-68  | 2.44E-67  | 143.6664 |
| COX8A       | 1.840826 | 7.471893 | 23.78395 | 1.68E-72  | 2.25E-71  | 153.091  |
| OTUB1       | 1.707541 | 5.188912 | 27.96286 | 1.28E-87  | 2.89E-86  | 187.9554 |
| STIP1       | 1.862672 | 5.292598 | 24.70152 | 6.79E-76  | 1.02E-74  | 160.9146 |
| FERMT3      | 3.22735  | 3.383915 | 32.32052 | 2.11E-102 | 1.01E-100 | 222.0605 |
| VEGFB       | 1.593668 | 6.243499 | 21.98524 | 9.60E-66  | 1.05E-64  | 137.5139 |
| FKBP2       | 1.115803 | 6.698433 | 15.67258 | 2.12E-41  | 1.31E-40  | 81.44815 |
| P11-783K16. | 1.287004 | 2.378479 | 14.42169 | 1.31E-36  | 7.35E-36  | 70.43249 |
| PLCB3       | 2.352863 | 3.267075 | 34.21832 | 1.62E-108 | 1.11E-106 | 236.1725 |
| BAD         | 1.704264 | 5.194956 | 24.55956 | 2.26E-75  | 3.34E-74  | 159.71   |
| GPR137      | 1.638545 | 3.979919 | 24.34831 | 1.36E-74  | 1.95E-73  | 157.9135 |
| TRMT112     | 2.079563 | 6.812129 | 28.41575 | 3.33E-89  | 8.14E-88  | 191.6101 |
| PRDX5       | 2.184985 | 7.324354 | 28.31836 | 7.29E-89  | 1.75E-87  | 190.8263 |
| CCDC88B     | 2.325208 | 3.557091 | 30.81034 | 2.14E-97  | 7.82E-96  | 210.51   |
| RPS6KA4     | 2.153413 | 3.741366 | 32.99824 | 1.31E-104 | 7.17E-103 | 227.1513 |
| NRXN2       | 1.601059 | 2.08075  | 16.75851 | 1.35E-45  | 9.12E-45  | 91.10614 |
| RASGRP2     | 1.016981 | 2.281115 | 9.787548 | 6.10E-20  | 2.43E-19  | 32.19439 |
| MAP4K2      | 1.125488 | 2.961455 | 18.66865 | 5.25E-53  | 4.16E-52  | 108.1643 |
| EHD1        | 2.80361  | 3.925617 | 41.98978 | 1.28E-131 | 4.26E-129 | 289.4898 |
| GPHA2       | -3.24771 | 2.665258 | -21.1559 | 1.38E-62  | 1.39E-61  | 130.2376 |
| ARL2        | 1.658747 | 5.66232  | 24.97916 | 6.50E-77  | 1.01E-75  | 163.2642 |
| SNX15       | 1.333086 | 3.249768 | 23.91094 | 5.67E-73  | 7.68E-72  | 154.179  |
| SAC3D1      | 1.230456 | 2.602959 | 20.73922 | 5.42E-61  | 5.24E-60  | 126.5633 |
| NAALADL1    | 1.962377 | 2.015012 | 29.45316 | 8.62E-93  | 2.49E-91  | 199.886  |
| CDCA5       | 2.499621 | 1.525213 | 42.78815 | 7.91E-134 | 3.19E-131 | 294.5849 |
| TM7SF2      | -1.06308 | 4.464668 | -9.52691 | 4.35E-19  | 1.70E-18  | 30.24301 |
| FAU         | 1.318783 | 9.364185 | 14.76769 | 6.28E-38  | 3.64E-37  | 73.46347 |
| MRPL49      | 1.62576  | 4.292732 | 27.64    | 1.75E-86  | 3.80E-85  | 185.3347 |
| CAPN1       | 1.688339 | 6.174961 | 21.93329 | 1.51E-65  | 1.65E-64  | 137.0597 |
| POLA2       | 1.23824  | 2.833492 | 25.6424  | 2.48E-79  | 4.16E-78  | 168.8422 |
| CDC42EP2    | 2.720532 | 2.841712 | 38.09357 | 2.04E-120 | 2.94E-118 | 263.6296 |
| DPF2        | 1.279214 | 4.213275 | 22.13008 | 2.71E-66  | 3.02E-65  | 138.7789 |
| SLC25A45    | -1.68498 | 3.258262 | -22.2946 | 6.47E-67  | 7.32E-66  | 140.214  |
| FRMD8       | 1.320126 | 3.852855 | 19.5568  | 1.92E-56  | 1.66E-55  | 116.0794 |
| NEAT1       | -1.84671 | 9.307588 | -12.8458 | 1.07E-30  | 5.34E-30  | 56.84925 |
| NEAT1_1     | -1.97807 | 1.487678 | -8.01998 | 2.06E-14  | 7.19E-14  | 19.58099 |
| SCYL1       | 1.219941 | 5.297093 | 19.40763 | 7.25E-56  | 6.15E-55  | 114.752  |
| EHBP1L1     | 2.679893 | 4.251418 | 30.54115 | 1.72E-96  | 5.99E-95  | 208.4212 |
| SIPA1       | 2.494082 | 4.293956 | 31.51361 | 9.63E-100 | 3.95E-98  | 215.9245 |
| MAP3K11     | 1.627803 | 4.617283 | 25.75777 | 9.46E-80  | 1.61E-78  | 169.8074 |
| RELA        | 1.30546  | 5.00514  | 19.05089 | 1.74E-54  | 1.43E-53  | 111.5739 |
| KAT5        | 1.015437 | 4.594323 | 17.77596 | 1.52E-49  | 1.12E-48  | 100.191  |
| RNASEH2C    | 1.464496 | 4.551984 | 23.82048 | 1.23E-72  | 1.65E-71  | 153.4041 |
| OVOL1       | 1.540215 | 1.636712 | 17.99248 | 2.20E-50  | 1.64E-49  | 102.1256 |
| CFL1        | 3.539651 | 8.241981 | 40.86765 | 1.81E-128 | 4.42E-126 | 282.2137 |
| EFEMP2      | 2.676682 | 4.822948 | 30.61683 | 9.57E-97  | 3.38E-95  | 209.0094 |
| CTSW        | 1.882054 | 1.313267 | 23.2757  | 1.32E-70  | 1.67E-69  | 148.7203 |
| FIBP        | 1.748482 | 5.106895 | 28.1434  | 2.98E-88  | 6.94E-87  | 189.4153 |
| FOSL1       | 3.475529 | 2.365714 | 33.24569 | 2.08E-105 | 1.19E-103 | 228.9958 |
| C11orf68    | 1.682845 | 4.267102 | 28.93865 | 5.10E-91  | 1.36E-89  | 195.7982 |

|             |           |           |           |            |            |           |
|-------------|-----------|-----------|-----------|------------|------------|-----------|
| DRAP1       | 2. 202993 | 5. 713392 | 34. 48226 | 2. 36E-109 | 1. 72E-107 | 238. 1    |
| SART1       | 1. 677872 | 5. 090861 | 26. 08436 | 6. 23E-81  | 1. 10E-79  | 172. 5315 |
| EIF1AD      | 1. 423851 | 3. 477802 | 27. 24713 | 4. 30E-85  | 8. 80E-84  | 182. 1287 |
| BANF1       | 1. 870224 | 6. 433626 | 26. 74259 | 2. 69E-83  | 5. 18E-82  | 177. 9841 |
| CST6        | 3. 875124 | 2. 153116 | 25. 50678 | 7. 71E-79  | 1. 27E-77  | 167. 7057 |
| CATSPER1    | 1. 792031 | 0. 974569 | 26. 74954 | 2. 54E-83  | 4. 90E-82  | 178. 0414 |
| SF3B2       | 1. 320505 | 6. 321939 | 19. 73847 | 3. 83E-57  | 3. 35E-56  | 117. 6949 |
| PACS1       | 1. 71609  | 4. 414502 | 25. 14062 | 1. 67E-77  | 2. 64E-76  | 164. 6266 |
| KLC2        | 1. 150596 | 3. 336233 | 18. 16019 | 4. 92E-51  | 3. 73E-50  | 103. 6239 |
| RAB1B       | 1. 976447 | 6. 099521 | 29. 55164 | 3. 96E-93  | 1. 17E-91  | 200. 6647 |
| P11-867G23. | 2. 093698 | 2. 581678 | 13. 72398 | 5. 68E-34  | 3. 04E-33  | 64. 36852 |
| YIF1A       | 1. 238355 | 5. 816191 | 18. 02023 | 1. 72E-50  | 1. 29E-49  | 102. 3736 |
| CD248       | 3. 010098 | 3. 767294 | 28. 3466  | 5. 81E-89  | 1. 40E-87  | 191. 0537 |
| RIN1        | 1. 72344  | 2. 837732 | 22. 3887  | 2. 85E-67  | 3. 27E-66  | 141. 0335 |
| BRMS1       | 1. 444157 | 4. 741496 | 23. 75018 | 2. 24E-72  | 2. 98E-71  | 152. 8014 |
| MRPL11      | 1. 450579 | 4. 918647 | 24. 32856 | 1. 61E-74  | 2. 30E-73  | 157. 7453 |
| DPP3        | 2. 09521  | 4. 22852  | 32. 66669 | 1. 56E-103 | 8. 07E-102 | 224. 668  |
| CCS         | 1. 0101   | 4. 897148 | 15. 00494 | 7. 77E-39  | 4. 58E-38  | 75. 54956 |
| RBM4        | 1. 100421 | 5. 907019 | 16. 8392  | 6. 55E-46  | 4. 47E-45  | 91. 82582 |
| C11orf80    | 1. 952007 | 3. 02648  | 26. 21493 | 2. 11E-81  | 3. 78E-80  | 173. 6172 |
| RCE1        | 1. 253851 | 3. 839397 | 20. 92843 | 1. 02E-61  | 1. 00E-60  | 128. 2333 |
| PC          | 1. 301961 | 2. 814667 | 19. 66139 | 7. 59E-57  | 6. 61E-56  | 117. 0097 |
| LRFN4       | 2. 445053 | 2. 35324  | 27. 88251 | 2. 45E-87  | 5. 48E-86  | 187. 3044 |
| C11orf86    | 1. 632592 | 0. 786259 | 15. 21459 | 1. 22E-39  | 7. 31E-39  | 77. 39763 |
| SYT12       | 1. 972242 | 1. 152652 | 23. 13785 | 4. 33E-70  | 5. 39E-69  | 147. 5306 |
| RHOD        | 1. 666232 | 4. 600107 | 18. 51272 | 2. 11E-52  | 1. 65E-51  | 106. 7724 |
| KDM2A       | 1. 533401 | 4. 171967 | 23. 80486 | 1. 40E-72  | 1. 88E-71  | 153. 2702 |
| ADRBK1      | 1. 851649 | 4. 977572 | 25. 94056 | 2. 06E-80  | 3. 57E-79  | 171. 3336 |
| ANKRD13D    | 1. 477364 | 4. 103775 | 19. 22547 | 3. 67E-55  | 3. 07E-54  | 113. 1298 |
| SSH3        | 1. 541573 | 4. 169942 | 20. 62476 | 1. 49E-60  | 1. 42E-59  | 125. 5519 |
| POLD4       | 1. 799897 | 6. 388699 | 20. 69329 | 8. 13E-61  | 7. 81E-60  | 126. 1576 |
| CLCF1       | 2. 04881  | 2. 681191 | 24. 66876 | 8. 96E-76  | 1. 34E-74  | 160. 6368 |
| PPP1CA      | 1. 912814 | 6. 25508  | 28. 0921  | 4. 51E-88  | 1. 04E-86  | 189. 001  |
| TBC1D10C    | 1. 712019 | 1. 689678 | 18. 37415 | 7. 27E-52  | 5. 63E-51  | 105. 535  |
| PTPRCAP     | 2. 295187 | 2. 060776 | 19. 98991 | 4. 11E-58  | 3. 67E-57  | 119. 9282 |
| CORO1B      | 1. 799166 | 5. 51652  | 25. 1473  | 1. 58E-77  | 2. 49E-76  | 164. 6829 |
| CABP4       | 1. 606117 | 1. 23953  | 25. 1602  | 1. 42E-77  | 2. 24E-76  | 164. 7916 |
| AIP         | 1. 868837 | 5. 150712 | 29. 55175 | 3. 96E-93  | 1. 17E-91  | 200. 6655 |
| PITPNM1     | 1. 513585 | 3. 645636 | 19. 18472 | 5. 27E-55  | 4. 39E-54  | 112. 7667 |
| GSTP1       | 2. 597946 | 8. 22443  | 29. 394   | 1. 38E-92  | 3. 95E-91  | 199. 4177 |
| NUDT8       | 1. 351073 | 3. 119906 | 17. 8202  | 1. 03E-49  | 7. 57E-49  | 100. 5863 |
| ALDH3B2     | 1. 30018  | 0. 778932 | 15. 65657 | 2. 44E-41  | 1. 51E-40  | 81. 30625 |
| UNC93B1     | 2. 772392 | 4. 42597  | 34. 79405 | 2. 46E-110 | 1. 88E-108 | 240. 3659 |
| ALDH3B1     | 3. 124157 | 3. 57105  | 27. 51571 | 4. 81E-86  | 1. 02E-84  | 184. 3225 |
| NDUFS8      | 1. 633852 | 6. 041799 | 24. 08772 | 1. 25E-73  | 1. 74E-72  | 155. 6909 |
| P11-802E16. | -1. 08368 | 2. 789707 | -12. 4762 | 2. 43E-29  | 1. 18E-28  | 53. 7311  |
| C11orf24    | 1. 734219 | 4. 287116 | 29. 46245 | 8. 01E-93  | 2. 32E-91  | 199. 9595 |
| LRP5        | 1. 866443 | 4. 554608 | 24. 32622 | 1. 64E-74  | 2. 35E-73  | 157. 7253 |
| PPP6R3      | 1. 01303  | 4. 112978 | 17. 41154 | 3. 95E-48  | 2. 81E-47  | 96. 93534 |
| CPT1A       | 1. 297523 | 3. 565725 | 18. 24769 | 2. 25E-51  | 1. 72E-50  | 104. 4056 |
| MRPL21      | 1. 373286 | 5. 045799 | 21. 80013 | 4. 84E-65  | 5. 21E-64  | 135. 8945 |
| MRGPRF      | 1. 654103 | 1. 961006 | 18. 10098 | 8. 34E-51  | 6. 29E-50  | 103. 095  |
| MYEOV       | 4. 10719  | 3. 0176   | 32. 62277 | 2. 17E-103 | 1. 10E-101 | 224. 338  |
| P11-211G23. | 2. 324387 | 1. 224734 | 21. 89815 | 2. 05E-65  | 2. 24E-64  | 136. 7523 |

|              |           |           |           |            |            |           |
|--------------|-----------|-----------|-----------|------------|------------|-----------|
| AP000439.3   | 1. 078968 | 0. 527598 | 17. 59476 | 7. 68E-49  | 5. 56E-48  | 98. 57215 |
| CCND1        | 2. 389394 | 4. 693441 | 27. 82261 | 3. 98E-87  | 8. 83E-86  | 186. 8186 |
| FGF19        | 2. 040776 | 0. 999551 | 16. 17298 | 2. 48E-43  | 1. 60E-42  | 85. 89092 |
| P11-626H12.  | 1. 166322 | 0. 578449 | 17. 71262 | 2. 68E-49  | 1. 96E-48  | 99. 62514 |
| AN01         | 4. 336676 | 3. 422014 | 45. 15331 | 3. 36E-140 | 2. 18E-137 | 309. 2929 |
| FADD         | 2. 119825 | 3. 014898 | 37. 24947 | 6. 86E-118 | 8. 41E-116 | 257. 8007 |
| P11-805J14.  | 2. 773688 | 2. 248498 | 44. 11478 | 1. 97E-137 | 1. 00E-134 | 302. 9045 |
| PPFIA1       | 1. 04198  | 3. 552215 | 17. 70494 | 2. 87E-49  | 2. 10E-48  | 99. 55649 |
| CTTN         | 1. 342473 | 6. 508308 | 20. 97006 | 7. 08E-62  | 6. 98E-61  | 128. 6004 |
| DHCR7        | 2. 130905 | 3. 534713 | 29. 02372 | 2. 59E-91  | 7. 04E-90  | 196. 4764 |
| RNF121       | 1. 347892 | 3. 600636 | 25. 22113 | 8. 48E-78  | 1. 35E-76  | 165. 3049 |
| IL18BP       | 1. 536872 | 2. 808859 | 17. 81029 | 1. 12E-49  | 8. 26E-49  | 100. 4978 |
| LAMTOR1      | 1. 656121 | 5. 759421 | 25. 93476 | 2. 16E-80  | 3. 75E-79  | 171. 2853 |
| ANAPC15      | 1. 251188 | 4. 529875 | 22. 40286 | 2. 52E-67  | 2. 89E-66  | 141. 1568 |
| FOLR1        | 2. 295552 | 2. 540275 | 17. 84783 | 8. 01E-50  | 5. 92E-49  | 100. 8333 |
| FOLR2        | 2. 590858 | 2. 555249 | 24. 03715 | 1. 93E-73  | 2. 66E-72  | 155. 2587 |
| ARAP1        | 1. 431106 | 5. 04292  | 19. 67902 | 6. 49E-57  | 5. 65E-56  | 117. 1664 |
| ARAP1-AS1    | 3. 369182 | 1. 874412 | 23. 91265 | 5. 58E-73  | 7. 57E-72  | 154. 1936 |
| FCHSD2       | 1. 605668 | 2. 805118 | 26. 33081 | 8. 07E-82  | 1. 47E-80  | 174. 579  |
| P2RY2        | 1. 703328 | 1. 148125 | 28. 61501 | 6. 75E-90  | 1. 71E-88  | 193. 21   |
| RP11-800A3.4 | 1. 200883 | 0. 742035 | 21. 22583 | 7. 45E-63  | 7. 56E-62  | 130. 8533 |
| P2RY6        | 1. 770604 | 1. 386122 | 24. 56773 | 2. 11E-75  | 3. 11E-74  | 159. 7794 |
| RELT         | 2. 077988 | 1. 572734 | 34. 28332 | 1. 01E-108 | 7. 05E-107 | 236. 648  |
| FAM168A      | 1. 487959 | 2. 846812 | 23. 3546  | 6. 70E-71  | 8. 52E-70  | 149. 4005 |
| PLEKHB1      | 1. 728336 | 3. 554782 | 19. 75604 | 3. 27E-57  | 2. 87E-56  | 117. 8511 |
| RAB6A        | 1. 817885 | 4. 782086 | 26. 66607 | 5. 06E-83  | 9. 63E-82  | 177. 3528 |
| MRPL48       | 1. 153352 | 4. 408993 | 13. 22808 | 4. 08E-32  | 2. 10E-31  | 60. 10512 |
| COA4         | 1. 643792 | 5. 024837 | 27. 32239 | 2. 33E-85  | 4. 81E-84  | 182. 7443 |
| DNAJB13      | 1. 378227 | 1. 068497 | 12. 71584 | 3. 21E-30  | 1. 59E-29  | 55. 74963 |
| UCP2         | 3. 464032 | 4. 083652 | 36. 75076 | 2. 21E-116 | 2. 50E-114 | 254. 3178 |
| C2CD3        | 1. 102629 | 2. 526357 | 20. 54724 | 2. 95E-60  | 2. 79E-59  | 124. 8665 |
| PPME1        | 1. 804391 | 3. 769633 | 32. 65096 | 1. 76E-103 | 8. 99E-102 | 224. 5498 |
| P4HA3        | 2. 192616 | 1. 394646 | 23. 35466 | 6. 69E-71  | 8. 52E-70  | 149. 401  |
| PGM2L1       | 1. 743987 | 1. 807222 | 27. 97629 | 1. 15E-87  | 2. 60E-86  | 188. 0642 |
| KCNE3        | 1. 969398 | 3. 157047 | 18. 39258 | 6. 17E-52  | 4. 78E-51  | 105. 6995 |
| AP001372.2   | 1. 124215 | 1. 772464 | 21. 92304 | 1. 65E-65  | 1. 80E-64  | 136. 97   |
| CHRDL2       | 1. 220175 | 1. 59259  | 9. 874721 | 3. 14E-20  | 1. 26E-19  | 32. 85338 |
| SPCS2        | 1. 108711 | 6. 619042 | 15. 37372 | 2. 99E-40  | 1. 81E-39  | 78. 80306 |
| SLCO2B1      | 1. 216248 | 3. 651451 | 11. 91018 | 2. 76E-27  | 1. 29E-26  | 49. 01698 |
| SERPINH1     | 3. 902289 | 5. 561079 | 39. 5509  | 1. 08E-124 | 2. 01E-122 | 273. 5002 |
| MAP6         | 1. 294019 | 1. 795512 | 15. 84374 | 4. 64E-42  | 2. 91E-41  | 82. 96601 |
| MOGAT2       | 1. 149213 | 0. 578694 | 13. 0491  | 1. 89E-31  | 9. 58E-31  | 58. 57733 |
| DGAT2        | 2. 001843 | 1. 948786 | 19. 48169 | 3. 75E-56  | 3. 21E-55  | 115. 4111 |
| UVRAG        | 1. 69771  | 2. 461647 | 33. 13116 | 4. 88E-105 | 2. 73E-103 | 228. 143  |
| LRRC32       | 3. 03547  | 4. 267545 | 34. 91753 | 1. 01E-110 | 7. 96E-109 | 241. 26   |
| TSKU         | 2. 372314 | 3. 864012 | 29. 28349 | 3. 30E-92  | 9. 33E-91  | 198. 5416 |
| ACER3        | 1. 516145 | 1. 842943 | 32. 3912  | 1. 24E-102 | 5. 98E-101 | 222. 5941 |
| TD-2547H18.  | 1. 077965 | 0. 52657  | 13. 15904 | 7. 37E-32  | 3. 78E-31  | 59. 51508 |
| B3GNT6       | 1. 542001 | 0. 755247 | 13. 27937 | 2. 63E-32  | 1. 36E-31  | 60. 54405 |
| CAPN5        | 3. 448073 | 3. 435705 | 35. 02672 | 4. 59E-111 | 3. 71E-109 | 242. 0491 |
| PAK1         | 1. 914728 | 4. 323682 | 26. 09353 | 5. 77E-81  | 1. 02E-79  | 172. 6079 |
| CLNS1A       | 1. 107619 | 5. 72937  | 15. 93841 | 2. 00E-42  | 1. 27E-41  | 83. 80636 |
| RSF1         | 1. 627457 | 2. 766737 | 25. 71962 | 1. 30E-79  | 2. 20E-78  | 169. 4885 |
| AAMDC        | 1. 722653 | 4. 560123 | 27. 72017 | 9. 14E-87  | 2. 00E-85  | 185. 9867 |

|          |           |           |           |            |            |           |
|----------|-----------|-----------|-----------|------------|------------|-----------|
| NDUFC2   | 2. 100996 | 6. 511914 | 32. 09351 | 1. 17E-101 | 5. 35E-100 | 220. 3425 |
| ALG8     | 1. 635628 | 4. 055113 | 30. 81646 | 2. 04E-97  | 7. 47E-96  | 210. 5575 |
| KCTD21   | 1. 422676 | 1. 873892 | 33. 0884  | 6. 70E-105 | 3. 72E-103 | 227. 8242 |
| GAB2     | 1. 155517 | 2. 348664 | 17. 80362 | 1. 19E-49  | 8. 76E-49  | 100. 4382 |
| NARS2    | 1. 003513 | 2. 829159 | 21. 43497 | 1. 19E-63  | 1. 23E-62  | 132. 6921 |
| TENM4    | 1. 318996 | 0. 810398 | 23. 30245 | 1. 05E-70  | 1. 33E-69  | 148. 951  |
| RPS28P7  | 2. 147044 | 8. 906121 | 23. 99391 | 2. 79E-73  | 3. 83E-72  | 154. 889  |
| PRCP     | 1. 814083 | 4. 602395 | 25. 17847 | 1. 21E-77  | 1. 93E-76  | 164. 9456 |
| ANKRD42  | 1. 17582  | 2. 162375 | 25. 77576 | 8. 14E-80  | 1. 39E-78  | 169. 9578 |
| CCDC90B  | 1. 394007 | 4. 270237 | 23. 7525  | 2. 20E-72  | 2. 93E-71  | 152. 8213 |
| TMEM126B | 1. 314133 | 4. 398736 | 12. 60351 | 8. 32E-30  | 4. 08E-29  | 54. 8018  |
| TMEM126A | 1. 024301 | 4. 305612 | 19. 4322  | 5. 82E-56  | 4. 96E-55  | 114. 9707 |
| SYTL2    | 3. 174015 | 3. 187135 | 35. 35021 | 4. 49E-112 | 3. 84E-110 | 244. 3784 |
| PICALM   | 1. 828145 | 5. 48495  | 24. 71219 | 6. 21E-76  | 9. 31E-75  | 161. 005  |
| C11orf73 | 1. 672685 | 4. 331609 | 29. 99337 | 1. 23E-94  | 3. 93E-93  | 204. 1424 |
| PRSS23   | 3. 219908 | 4. 28847  | 33. 27093 | 1. 73E-105 | 9. 90E-104 | 229. 1835 |
| TMEM135  | 1. 376643 | 2. 271278 | 23. 84528 | 9. 93E-73  | 1. 34E-71  | 153. 6167 |
| RAB38    | 1. 65077  | 1. 457534 | 27. 94741 | 1. 45E-87  | 3. 27E-86  | 187. 8304 |
| CTSC     | 3. 283913 | 5. 476563 | 40. 33856 | 5. 83E-127 | 1. 26E-124 | 278. 7355 |
| NOX4     | 2. 893816 | 1. 71948  | 36. 59403 | 6. 64E-116 | 7. 33E-114 | 253. 2171 |
| CHORDC1  | 1. 128143 | 3. 278877 | 15. 80217 | 6. 71E-42  | 4. 20E-41  | 82. 59719 |
| SMCO4    | 1. 301435 | 5. 056537 | 18. 66226 | 5. 56E-53  | 4. 40E-52  | 108. 1072 |
| MED17    | 1. 2049   | 3. 522451 | 18. 15386 | 5. 20E-51  | 3. 94E-50  | 103. 5674 |
| PANX1    | 2. 021017 | 2. 479104 | 33. 68666 | 7. 98E-107 | 4. 96E-105 | 232. 2641 |
| FUT4     | 1. 182305 | 2. 138655 | 20. 57936 | 2. 22E-60  | 2. 11E-59  | 125. 1505 |
| CWC15    | 1. 293691 | 4. 837264 | 22. 61309 | 4. 06E-68  | 4. 77E-67  | 142. 9849 |
| ENDOD1   | 2. 590241 | 2. 83299  | 38. 75886 | 2. 21E-122 | 3. 63E-120 | 268. 1656 |
| SESN3    | 1. 698224 | 1. 919383 | 24. 04336 | 1. 83E-73  | 2. 52E-72  | 155. 3117 |
| MTMR2    | 1. 901436 | 2. 956497 | 32. 54118 | 4. 01E-103 | 2. 00E-101 | 223. 7243 |
| MAML2    | 1. 838246 | 1. 852072 | 29. 4615  | 8. 07E-93  | 2. 34E-91  | 199. 952  |
| JRKL     | 1. 587727 | 2. 268959 | 27. 40828 | 1. 15E-85  | 2. 42E-84  | 183. 446  |
| ARHGAP42 | 1. 789891 | 1. 248353 | 30. 99682 | 5. 08E-98  | 1. 92E-96  | 211. 9518 |
| TMEM133  | 1. 971722 | 1. 467    | 37. 35098 | 3. 39E-118 | 4. 25E-116 | 258. 5061 |
| C11orf70 | 1. 752817 | 1. 238792 | 28. 80137 | 1. 52E-90  | 3. 98E-89  | 194. 702  |
| YAP1     | 2. 155418 | 3. 763121 | 28. 99185 | 3. 34E-91  | 9. 04E-90  | 196. 2224 |
| BIRC3    | 3. 034303 | 3. 390063 | 28. 51504 | 1. 50E-89  | 3. 73E-88  | 192. 4079 |
| TMEM123  | 2. 268107 | 5. 398334 | 28. 21077 | 1. 73E-88  | 4. 07E-87  | 189. 9591 |
| MMP7     | 4. 985126 | 6. 875865 | 31. 56467 | 6. 52E-100 | 2. 71E-98  | 216. 3152 |
| MMP10    | 2. 063067 | 1. 109138 | 21. 22071 | 7. 79E-63  | 7. 91E-62  | 130. 8083 |
| MMP1     | 5. 479277 | 3. 121485 | 30. 13763 | 3. 98E-95  | 1. 30E-93  | 205. 2729 |
| MMP3     | 1. 410258 | 0. 844979 | 15. 1457  | 2. 25E-39  | 1. 34E-38  | 76. 78988 |
| MMP12    | 2. 914259 | 1. 401457 | 28. 81496 | 1. 37E-90  | 3. 58E-89  | 194. 8106 |
| MMP13    | 1. 119876 | 0. 536676 | 12. 76416 | 2. 13E-30  | 1. 06E-29  | 56. 15823 |
| DCUN1D5  | 1. 044705 | 3. 387793 | 18. 36134 | 8. 16E-52  | 6. 30E-51  | 105. 4206 |
| DYNC2H1  | 1. 386041 | 2. 692614 | 18. 31509 | 1. 23E-51  | 9. 48E-51  | 105. 0075 |
| CASP4    | 1. 160867 | 5. 524928 | 13. 7251  | 5. 63E-34  | 3. 01E-33  | 64. 37823 |
| CASP1    | 2. 73215  | 3. 237731 | 32. 64469 | 1. 84E-103 | 9. 41E-102 | 224. 5027 |
| CARD16   | 3. 359324 | 3. 03775  | 43. 18122 | 6. 64E-135 | 2. 89E-132 | 297. 0688 |
| CWF19L2  | 1. 084232 | 1. 977336 | 24. 07389 | 1. 41E-73  | 1. 95E-72  | 155. 5727 |
| SLC35F2  | 2. 018504 | 2. 526848 | 28. 57062 | 9. 63E-90  | 2. 41E-88  | 192. 854  |
| NPAT     | 1. 184947 | 1. 93124  | 23. 93893 | 4. 46E-73  | 6. 07E-72  | 154. 4186 |
| KDELC2   | 2. 050264 | 2. 944729 | 30. 21516 | 2. 18E-95  | 7. 18E-94  | 205. 8794 |
| DDX10    | 1. 188223 | 3. 358139 | 23. 25382 | 1. 60E-70  | 2. 01E-69  | 148. 5316 |
| FDX1     | 1. 002457 | 2. 818601 | 22. 47371 | 1. 36E-67  | 1. 58E-66  | 141. 7733 |

|               |          |          |          |           |           |          |
|---------------|----------|----------|----------|-----------|-----------|----------|
| C11orf53      | 1.605262 | 0.967075 | 19.72915 | 4.16E-57  | 3.64E-56  | 117.6121 |
| COLCA1        | 1.330115 | 1.884338 | 17.37852 | 5.30E-48  | 3.77E-47  | 96.64043 |
| COLCA2        | 1.196959 | 2.516597 | 14.43251 | 1.19E-36  | 6.69E-36  | 70.52705 |
| POU2AF1       | 1.91658  | 1.161698 | 18.41123 | 5.22E-52  | 4.05E-51  | 105.8661 |
| LAYN          | 2.361932 | 2.037655 | 32.12718 | 9.08E-102 | 4.17E-100 | 220.5977 |
| CRYAB         | 1.132901 | 4.661006 | 10.45639 | 3.48E-22  | 1.45E-21  | 37.32718 |
| HSPB2         | 1.524332 | 1.31621  | 25.54447 | 5.62E-79  | 9.32E-78  | 168.0217 |
| SPB2-C11orf53 | 1.137762 | 1.004281 | 16.1766  | 2.40E-43  | 1.55E-42  | 85.92315 |
| DLAT          | 1.640122 | 2.848453 | 27.40448 | 1.19E-85  | 2.50E-84  | 183.415  |
| C11orf57      | 1.004609 | 3.127911 | 18.39673 | 5.95E-52  | 4.61E-51  | 105.7367 |
| TIMM8B        | 1.891626 | 4.522738 | 33.67439 | 8.74E-107 | 5.41E-105 | 232.1735 |
| SDHD          | 1.716214 | 5.311136 | 25.77808 | 7.98E-80  | 1.36E-78  | 169.9772 |
| IL18          | 3.025853 | 3.829006 | 35.2745  | 7.73E-112 | 6.54E-110 | 243.8344 |
| PTS           | 1.666287 | 3.956815 | 28.5513  | 1.12E-89  | 2.81E-88  | 192.699  |
| ZBTB16        | -1.00811 | 2.563389 | -8.55358 | 5.16E-16  | 1.87E-15  | 23.22709 |
| NNMT          | 4.071614 | 6.641686 | 32.17113 | 6.52E-102 | 3.02E-100 | 220.9306 |
| AP002518.1    | 5.102592 | 3.751873 | 24.90587 | 1.21E-76  | 1.85E-75  | 162.6447 |
| RBM7          | 1.565886 | 3.322833 | 22.91006 | 3.10E-69  | 3.76E-68  | 145.5605 |
| REXO2         | 1.398959 | 5.285413 | 20.49017 | 4.89E-60  | 4.60E-59  | 124.3616 |
| CADM1         | 1.245234 | 2.786956 | 15.15947 | 1.99E-39  | 1.19E-38  | 76.91129 |
| BUD13         | 1.269169 | 3.009101 | 29.00111 | 3.10E-91  | 8.41E-90  | 196.2962 |
| ZPR1          | 1.479856 | 4.353906 | 21.89095 | 2.19E-65  | 2.38E-64  | 136.6894 |
| PAFAH1B2      | 2.061902 | 3.905318 | 38.26365 | 6.40E-121 | 9.51E-119 | 264.7941 |
| SIDT2         | -1.01127 | 5.038979 | -14.3719 | 2.02E-36  | 1.13E-35  | 69.99794 |
| TAGLN         | 3.435997 | 7.880748 | 27.34697 | 1.90E-85  | 3.95E-84  | 182.9452 |
| PCSK7         | 1.077604 | 4.219362 | 16.84757 | 6.08E-46  | 4.15E-45  | 91.90046 |
| AP000892.6    | 1.761008 | 2.564848 | 20.06957 | 2.03E-58  | 1.83E-57  | 120.6351 |
| BACE1         | -1.59597 | 4.785463 | -17.7213 | 2.48E-49  | 1.82E-48  | 99.7025  |
| CMB9-94B1.2   | -1.7735  | 1.510921 | -24.8028 | 2.88E-76  | 4.38E-75  | 161.7723 |
| FXYD6         | 1.619397 | 4.117809 | 17.48981 | 1.96E-48  | 1.41E-47  | 97.63456 |
| IL10RA        | 1.999389 | 2.242517 | 21.80546 | 4.62E-65  | 4.98E-64  | 135.9411 |
| TMPRSS4       | 6.843778 | 3.490748 | 70.3716  | 1.10E-195 | 3.31E-191 | 437.3721 |
| AMICA1        | 2.652179 | 2.360289 | 26.13687 | 4.03E-81  | 7.16E-80  | 172.9684 |
| MPZL3         | 1.222714 | 2.446813 | 19.98054 | 4.46E-58  | 3.99E-57  | 119.845  |
| MPZL2         | 2.677339 | 4.17658  | 28.31931 | 7.24E-89  | 1.74E-87  | 190.8339 |
| CD3E          | 2.824931 | 2.20987  | 26.63217 | 6.69E-83  | 1.27E-81  | 177.073  |
| CD3D          | 2.863396 | 1.957714 | 29.45478 | 8.51E-93  | 2.46E-91  | 199.8988 |
| CD3G          | 1.274524 | 0.780453 | 18.55424 | 1.46E-52  | 1.14E-51  | 107.143  |
| ATP5L         | 2.200211 | 7.19141  | 32.09131 | 1.19E-101 | 5.44E-100 | 220.3258 |
| ARCN1         | 1.183645 | 5.78578  | 18.37428 | 7.27E-52  | 5.62E-51  | 105.5362 |
| PHLDB1        | 1.22631  | 5.275647 | 15.42026 | 1.98E-40  | 1.21E-39  | 79.21444 |
| DDX6          | 1.441203 | 3.932365 | 24.7125  | 6.19E-76  | 9.28E-75  | 161.0077 |
| CXCR5         | 2.050324 | 1.723912 | 26.4344  | 3.42E-82  | 6.32E-81  | 175.4375 |
| BCL9L         | 1.239843 | 3.878667 | 13.17754 | 6.29E-32  | 3.23E-31  | 59.67309 |
| TRAPPC4       | 1.502816 | 5.256191 | 23.09565 | 6.24E-70  | 7.72E-69  | 147.1659 |
| VPS11         | 1.063409 | 4.12143  | 19.44079 | 5.40E-56  | 4.60E-55  | 115.0471 |
| HMBS          | 1.011843 | 3.597272 | 18.2626  | 1.97E-51  | 1.51E-50  | 104.5387 |
| H2AFX         | 1.964087 | 3.600928 | 26.56735 | 1.14E-82  | 2.15E-81  | 176.5374 |
| AP003391.1    | 1.875913 | 1.774948 | 10.15687 | 3.59E-21  | 1.47E-20  | 35.00719 |
| PDZD3         | 1.667308 | 1.433748 | 14.14324 | 1.49E-35  | 8.19E-35  | 68.00415 |
| CCDC153       | 1.324582 | 0.930085 | 24.28868 | 2.26E-74  | 3.22E-73  | 157.4055 |
| CBL           | 1.240387 | 1.511448 | 25.27807 | 5.25E-78  | 8.45E-77  | 165.7842 |
| MCAM          | 2.018942 | 4.250903 | 20.4743  | 5.63E-60  | 5.28E-59  | 124.2212 |
| RNF26         | 1.690301 | 3.403656 | 32.44118 | 8.50E-103 | 4.15E-101 | 222.9711 |

|              |          |          |          |           |           |          |
|--------------|----------|----------|----------|-----------|-----------|----------|
| C1QTNF5      | 3.36625  | 4.694465 | 37.09875 | 1.95E-117 | 2.32E-115 | 256.7512 |
| THY1         | 4.712778 | 4.891002 | 36.20363 | 1.04E-114 | 1.06E-112 | 250.4629 |
| P11-334E6.1  | 4.43802  | 3.437713 | 36.97541 | 4.61E-117 | 5.37E-115 | 255.8904 |
| TRIM29       | 5.815832 | 3.646199 | 44.8137  | 2.67E-139 | 1.60E-136 | 307.2157 |
| POU2F3       | 2.185632 | 1.347203 | 24.775   | 3.65E-76  | 5.51E-75  | 161.5372 |
| ARHGEF12     | 1.365123 | 3.88662  | 19.14609 | 7.44E-55  | 6.18E-54  | 112.4224 |
| SC5D         | 1.418478 | 3.433892 | 21.5661  | 3.76E-64  | 3.94E-63  | 133.8432 |
| SORL1        | 2.132052 | 2.665796 | 27.17256 | 7.91E-85  | 1.60E-83  | 181.518  |
| P11-166D19.  | 1.361968 | 2.805229 | 16.20088 | 1.94E-43  | 1.25E-42  | 86.13907 |
| UBASH3B      | 1.859634 | 1.244138 | 31.00478 | 4.77E-98  | 1.80E-96  | 212.0133 |
| C11orf63     | 1.1237   | 1.234295 | 24.32433 | 1.67E-74  | 2.38E-73  | 157.7093 |
| CLMP         | 1.75938  | 1.660884 | 18.94066 | 4.64E-54  | 3.77E-53  | 110.591  |
| GRAMD1B      | 2.253582 | 1.69501  | 26.65232 | 5.67E-83  | 1.08E-81  | 177.2393 |
| VWA5A        | 1.324533 | 3.797628 | 17.71276 | 2.68E-49  | 1.96E-48  | 99.62637 |
| SIAE         | 1.163544 | 3.479239 | 17.63337 | 5.44E-49  | 3.95E-48  | 98.91707 |
| SPA17        | 2.026804 | 2.324075 | 39.12954 | 1.82E-123 | 3.12E-121 | 270.6711 |
| NRGN         | 1.584534 | 1.733763 | 26.40798 | 4.26E-82  | 7.85E-81  | 175.2186 |
| VSIG2        | 5.503654 | 3.341562 | 42.66377 | 1.74E-133 | 6.74E-131 | 293.7955 |
| ESAM         | 1.788789 | 3.831645 | 23.37163 | 5.78E-71  | 7.37E-70  | 149.5472 |
| SLC37A2      | 1.888441 | 1.667911 | 22.94858 | 2.22E-69  | 2.70E-68  | 145.894  |
| FEZ1         | 2.20921  | 2.313062 | 31.13424 | 1.76E-98  | 6.81E-97  | 213.0115 |
| CHEK1        | 1.676734 | 1.686732 | 30.74078 | 3.66E-97  | 1.32E-95  | 209.9712 |
| HYLS1        | 1.164653 | 1.326309 | 31.03329 | 3.83E-98  | 1.46E-96  | 212.2333 |
| CDON         | 1.00465  | 1.210219 | 14.10149 | 2.14E-35  | 1.17E-34  | 67.64095 |
| FAM118B      | 2.036223 | 2.86338  | 39.57461 | 9.22E-125 | 1.72E-122 | 273.6588 |
| DCPS         | 1.452733 | 3.309906 | 23.80689 | 1.38E-72  | 1.85E-71  | 153.2876 |
| ST3GAL4-AS1  | 1.03409  | 0.908062 | 21.55087 | 4.29E-64  | 4.50E-63  | 133.7096 |
| ST3GAL4      | 2.379913 | 3.648292 | 21.80252 | 4.74E-65  | 5.11E-64  | 135.9154 |
| RP11-676M6.1 | 1.413196 | 0.987985 | 26.93641 | 5.48E-84  | 1.08E-82  | 179.5798 |
| ETS1         | 2.694634 | 3.749327 | 30.35467 | 7.33E-96  | 2.47E-94  | 206.9688 |
| FLI1         | 1.853194 | 2.149448 | 22.40744 | 2.42E-67  | 2.78E-66  | 141.1966 |
| KCNJ5        | -1.09661 | 1.671597 | -12.6038 | 8.30E-30  | 4.07E-29  | 54.8045  |
| BARX2        | 1.722438 | 2.422339 | 19.51497 | 2.79E-56  | 2.39E-55  | 115.7073 |
| TMEM45B      | 3.961468 | 2.513378 | 36.92465 | 6.57E-117 | 7.62E-115 | 255.5355 |
| APLP2        | 2.754768 | 6.529921 | 33.0097  | 1.20E-104 | 6.59E-103 | 227.2369 |
| ST14         | 2.527687 | 5.647657 | 31.51315 | 9.66E-100 | 3.96E-98  | 215.921  |
| ADAMTS15     | 1.030308 | 1.004888 | 15.22031 | 1.16E-39  | 6.96E-39  | 77.44811 |
| NTM          | 3.828679 | 2.291774 | 26.73154 | 2.95E-83  | 5.66E-82  | 177.8929 |
| JAM3         | 2.29131  | 2.895084 | 28.21372 | 1.69E-88  | 3.98E-87  | 189.9829 |
| THYN1        | 1.548518 | 4.660952 | 25.86001 | 4.03E-80  | 6.93E-79  | 170.6616 |
| KDM5A        | 1.235877 | 2.606651 | 20.83841 | 2.26E-61  | 2.20E-60  | 127.4391 |
| B4GALNT3     | 2.639932 | 2.792169 | 30.677   | 6.00E-97  | 2.14E-95  | 209.4765 |
| NINJ2        | 2.982989 | 2.051736 | 45.20726 | 2.42E-140 | 1.61E-137 | 309.6218 |
| WNK1         | 1.771434 | 3.75221  | 23.28383 | 1.23E-70  | 1.56E-69  | 148.7905 |
| ERC1         | 1.323641 | 2.120268 | 22.62598 | 3.63E-68  | 4.27E-67  | 143.0969 |
| WNT5B        | 1.776281 | 1.535505 | 20.91026 | 1.20E-61  | 1.18E-60  | 128.0731 |
| ADIPOR2      | 1.160862 | 4.151279 | 15.96514 | 1.58E-42  | 1.00E-41  | 84.04372 |
| CACNA2D4     | 1.516438 | 1.74588  | 23.56056 | 1.14E-71  | 1.48E-70  | 151.1731 |
| DCP1B        | 1.028981 | 2.661665 | 19.47744 | 3.89E-56  | 3.33E-55  | 115.3734 |
| CACNA1C      | 1.863497 | 1.686879 | 23.69148 | 3.71E-72  | 4.89E-71  | 152.2978 |
| FOXM1        | 2.630849 | 1.942998 | 33.19279 | 3.08E-105 | 1.75E-103 | 228.6021 |
| RHN01        | 2.034591 | 3.191139 | 35.79616 | 1.86E-113 | 1.73E-111 | 247.5687 |
| TULP3        | 1.174335 | 2.791173 | 19.70964 | 4.94E-57  | 4.32E-56  | 117.4387 |
| TSPAN9       | 1.985373 | 3.467737 | 28.10957 | 3.92E-88  | 9.07E-87  | 189.1421 |

|              |          |          |          |           |           |          |
|--------------|----------|----------|----------|-----------|-----------|----------|
| P11-476M19.  | -1.07978 | 0.621624 | -20.1319 | 1.17E-58  | 1.06E-57  | 121.1884 |
| RP11-320N7.2 | -2.84895 | 2.495865 | -21.9239 | 1.64E-65  | 1.79E-64  | 136.9771 |
| TIGAR        | 1.72228  | 1.665322 | 33.70064 | 7.20E-107 | 4.50E-105 | 232.3673 |
| RAD51AP1     | 1.762473 | 1.244766 | 30.61122 | 9.99E-97  | 3.53E-95  | 208.9658 |
| NDUFA9       | 1.632912 | 5.306209 | 24.68081 | 8.09E-76  | 1.21E-74  | 160.739  |
| P11-234B24.  | 1.520535 | 1.588728 | 19.45768 | 4.64E-56  | 3.96E-55  | 115.1975 |
| VWF          | 1.829373 | 4.251054 | 21.25466 | 5.78E-63  | 5.88E-62  | 131.107  |
| CD9          | 2.923816 | 6.438786 | 32.48917 | 5.93E-103 | 2.93E-101 | 223.3327 |
| PLEKHG6      | 2.091216 | 2.732094 | 25.1368  | 1.72E-77  | 2.72E-76  | 164.5944 |
| TNFRSF1A     | 2.289704 | 5.723433 | 26.58942 | 9.52E-83  | 1.80E-81  | 176.7199 |
| SCNN1A       | 1.90556  | 5.361799 | 16.40842 | 3.05E-44  | 2.01E-43  | 87.98616 |
| LTBR         | 1.385558 | 6.023814 | 16.80957 | 8.53E-46  | 5.80E-45  | 91.56152 |
| CD27-AS1     | 1.135219 | 4.293391 | 15.67328 | 2.11E-41  | 1.30E-40  | 81.45436 |
| CD27         | 2.315982 | 1.497782 | 23.58766 | 9.04E-72  | 1.18E-70  | 151.406  |
| TAPBPL       | 1.887009 | 3.82183  | 27.18274 | 7.28E-85  | 1.48E-83  | 181.6014 |
| MRPL51       | 1.454211 | 6.208345 | 20.31215 | 2.36E-59  | 2.18E-58  | 122.7856 |
| NCAPD2       | 1.802283 | 3.019738 | 27.62685 | 1.95E-86  | 4.21E-85  | 185.2278 |
| GAPDH        | 3.508978 | 9.490476 | 33.61256 | 1.38E-106 | 8.40E-105 | 231.7166 |
| RP5-940J5.9  | 3.306202 | 1.710791 | 13.36563 | 1.25E-32  | 6.52E-32  | 61.28336 |
| CHD4         | 1.697859 | 5.623916 | 25.90274 | 2.82E-80  | 4.87E-79  | 171.0182 |
| LPAR5        | 2.586866 | 1.546636 | 44.56805 | 1.20E-138 | 6.74E-136 | 305.706  |
| ING4         | 1.265179 | 4.31797  | 18.4191  | 4.87E-52  | 3.78E-51  | 105.9364 |
| COPS7A       | 1.613614 | 4.919755 | 25.59242 | 3.77E-79  | 6.29E-78  | 168.4236 |
| MLF2         | 1.598799 | 6.248446 | 23.47172 | 2.45E-71  | 3.15E-70  | 150.4091 |
| PTMS         | 2.407883 | 7.148433 | 27.58746 | 2.68E-86  | 5.76E-85  | 184.9071 |
| LAG3         | 1.148436 | 0.817949 | 20.0023  | 3.68E-58  | 3.30E-57  | 120.0381 |
| CD4          | 2.822917 | 3.023901 | 30.67911 | 5.91E-97  | 2.11E-95  | 209.4929 |
| P3H3         | 1.940715 | 3.710045 | 24.66935 | 8.92E-76  | 1.33E-74  | 160.6418 |
| CDCA3        | 2.366    | 1.945971 | 32.69127 | 1.30E-103 | 6.74E-102 | 224.8525 |
| USP5         | 1.831255 | 4.076427 | 31.05944 | 3.13E-98  | 1.20E-96  | 212.435  |
| TPI1         | 2.400682 | 7.680875 | 27.09478 | 1.50E-84  | 3.00E-83  | 180.8804 |
| SPSB2        | 1.714267 | 2.823412 | 25.01623 | 4.76E-77  | 7.37E-76  | 163.5772 |
| U47924.6     | 1.855659 | 1.71064  | 33.06553 | 7.95E-105 | 4.39E-103 | 227.6537 |
| LRRC23       | 1.652742 | 2.437615 | 26.11762 | 4.73E-81  | 8.38E-80  | 172.8082 |
| DSTNP2       | 1.834568 | 2.027637 | 32.13865 | 8.33E-102 | 3.84E-100 | 220.6846 |
| ENO2         | 2.911206 | 3.565369 | 28.59531 | 7.90E-90  | 1.99E-88  | 193.052  |
| C12orf57     | 1.061594 | 7.198793 | 13.31958 | 1.86E-32  | 9.65E-32  | 60.88855 |
| PTPN6        | 2.062947 | 4.499389 | 28.47012 | 2.16E-89  | 5.30E-88  | 192.0471 |
| EMG1         | 1.831301 | 3.596364 | 31.83269 | 8.47E-101 | 3.69E-99  | 218.3607 |
| RP3-461F17.5 | 2.118348 | 2.621645 | 34.83804 | 1.79E-110 | 1.39E-108 | 240.6846 |
| C1S          | 2.642979 | 6.500318 | 23.01707 | 1.23E-69  | 1.51E-68  | 146.4866 |
| C1R          | 2.842792 | 6.495797 | 24.97109 | 6.96E-77  | 1.08E-75  | 163.1959 |
| CLSTN3       | 1.602337 | 3.767418 | 19.99868 | 3.80E-58  | 3.40E-57  | 120.006  |
| CD163L1      | 2.188002 | 1.432639 | 25.02217 | 4.53E-77  | 7.03E-76  | 163.6273 |
| CD163        | 1.665745 | 4.070329 | 11.63858 | 2.60E-26  | 1.19E-25  | 46.78446 |
| APOBEC1      | 2.300041 | 1.11259  | 19.70181 | 5.30E-57  | 4.63E-56  | 117.369  |
| SLC2A14      | -1.41977 | 1.038144 | -26.0043 | 1.21E-80  | 2.12E-79  | 171.8649 |
| SLC2A3       | 2.770263 | 3.234966 | 23.66618 | 4.61E-72  | 6.06E-71  | 152.0806 |
| C3AR1        | 2.150777 | 2.156381 | 22.38574 | 2.93E-67  | 3.35E-66  | 141.0077 |
| CLEC4A       | 1.520197 | 1.721447 | 21.89294 | 2.15E-65  | 2.34E-64  | 136.7067 |
| CLEC4E       | 1.34808  | 1.325864 | 14.64505 | 1.84E-37  | 1.06E-36  | 72.38752 |
| MFAP5        | 3.673301 | 2.884283 | 30.22128 | 2.07E-95  | 6.86E-94  | 205.9273 |
| M6PR         | 1.521507 | 5.44618  | 24.1076  | 1.06E-73  | 1.47E-72  | 155.8606 |
| A2M          | 2.582108 | 6.095549 | 26.57069 | 1.11E-82  | 2.09E-81  | 176.5651 |

|              |           |           |           |            |            |           |
|--------------|-----------|-----------|-----------|------------|------------|-----------|
| KLRB1        | 1. 725612 | 1. 052562 | 21. 70069 | 1. 16E-64  | 1. 23E-63  | 135. 0234 |
| P11-705C15.  | 1. 552394 | 1. 478087 | 23. 58969 | 8. 88E-72  | 1. 16E-70  | 151. 4235 |
| CLEC2D       | 1. 218553 | 1. 96566  | 15. 21162 | 1. 25E-39  | 7. 51E-39  | 77. 37136 |
| RP11-75L1. 2 | 1. 197761 | 1. 596232 | 16. 07422 | 5. 98E-43  | 3. 83E-42  | 85. 01292 |
| CD69         | 1. 855834 | 1. 609669 | 17. 69128 | 3. 24E-49  | 2. 37E-48  | 99. 43446 |
| CLEC2B       | 2. 423517 | 2. 248053 | 30. 33361 | 8. 64E-96  | 2. 90E-94  | 206. 8045 |
| CLEC12A      | 1. 110811 | 0. 92158  | 14. 56608 | 3. 69E-37  | 2. 10E-36  | 71. 6956  |
| CLEC7A       | 1. 514279 | 2. 089233 | 11. 37854 | 2. 18E-25  | 9. 73E-25  | 44. 66648 |
| OLR1         | 3. 049503 | 2. 172502 | 26. 36337 | 6. 16E-82  | 1. 13E-80  | 174. 849  |
| KLRK1        | 1. 000475 | 1. 186709 | 12. 30674 | 1. 01E-28  | 4. 86E-28  | 52. 31149 |
| MAGOHB       | 1. 755462 | 3. 332042 | 30. 10968 | 4. 96E-95  | 1. 61E-93  | 205. 0541 |
| STYK1        | 2. 482528 | 1. 275159 | 35. 74758 | 2. 63E-113 | 2. 43E-111 | 247. 2223 |
| SMIM10L1     | 1. 116882 | 1. 982521 | 29. 23789 | 4. 73E-92  | 1. 33E-90  | 198. 1797 |
| ETV6         | 1. 726266 | 2. 939638 | 32. 59641 | 2. 65E-103 | 1. 34E-101 | 224. 1398 |
| BCL2L14      | 1. 019965 | 2. 177634 | 11. 82618 | 5. 53E-27  | 2. 56E-26  | 48. 32438 |
| MANSC1       | 1. 574552 | 4. 116928 | 21. 119   | 1. 91E-62  | 1. 91E-61  | 129. 9129 |
| LOH12CR1     | 1. 051529 | 2. 378595 | 21. 71373 | 1. 03E-64  | 1. 10E-63  | 135. 1377 |
| CREBL2       | 1. 54322  | 3. 602783 | 25. 395   | 1. 97E-78  | 3. 21E-77  | 166. 7673 |
| CDKN1B       | 1. 25275  | 3. 89081  | 20. 37106 | 1. 40E-59  | 1. 30E-58  | 123. 3073 |
| APOLD1       | 1. 565016 | 2. 474196 | 16. 56145 | 7. 80E-45  | 5. 19E-44  | 89. 34935 |
| RPL13AP20    | 1. 659139 | 1. 097867 | 31. 17108 | 1. 33E-98  | 5. 15E-97  | 213. 2952 |
| GPRC5A       | 6. 091029 | 4. 014383 | 53. 57954 | 4. 77E-161 | 1. 60E-157 | 357. 4149 |
| GSG1         | -1. 0307  | 0. 730654 | -16. 5076 | 1. 26E-44  | 8. 35E-44  | 88. 86962 |
| EMP1         | 3. 697636 | 4. 829564 | 32. 8739  | 3. 32E-104 | 1. 77E-102 | 226. 2216 |
| LINC01559    | 2. 797837 | 1. 361995 | 23. 31296 | 9. 58E-71  | 1. 22E-69  | 149. 0416 |
| ATF7IP       | 1. 243476 | 2. 691527 | 21. 66118 | 1. 63E-64  | 1. 73E-63  | 134. 6771 |
| PLBD1        | 2. 704572 | 4. 356654 | 33. 41418 | 5. 97E-106 | 3. 53E-104 | 230. 2474 |
| H2AFJ        | 1. 029391 | 6. 562228 | 11. 74694 | 1. 06E-26  | 4. 90E-26  | 47. 67276 |
| WBP11        | 1. 330525 | 3. 625527 | 21. 00825 | 5. 05E-62  | 5. 01E-61  | 128. 9371 |
| MGP          | 2. 983057 | 7. 637149 | 22. 68129 | 2. 25E-68  | 2. 66E-67  | 143. 5771 |
| ERP27        | -3. 77188 | 5. 059451 | -23. 0253 | 1. 15E-69  | 1. 41E-68  | 146. 5578 |
| ARHGDI B     | 3. 707957 | 5. 372875 | 39. 38844 | 3. 20E-124 | 5. 80E-122 | 272. 4118 |
| RERG         | 1. 458389 | 2. 314976 | 18. 29633 | 1. 46E-51  | 1. 12E-50  | 104. 84   |
| PTPRO        | 1. 073603 | 0. 792153 | 21. 62032 | 2. 34E-64  | 2. 47E-63  | 134. 3189 |
| EPS8         | 2. 439133 | 3. 95842  | 28. 97309 | 3. 88E-91  | 1. 04E-89  | 196. 0729 |
| STRAP        | 1. 241742 | 5. 401554 | 19. 17877 | 5. 56E-55  | 4. 63E-54  | 112. 7136 |
| DERA         | 1. 681726 | 3. 923736 | 26. 85738 | 1. 05E-83  | 2. 04E-82  | 178. 9297 |
| LMO3         | -1. 63409 | 2. 361397 | -18. 7998 | 1. 63E-53  | 1. 31E-52  | 109. 3346 |
| PIK3C2G      | 1. 010765 | 0. 839316 | 11. 73377 | 1. 19E-26  | 5. 45E-26  | 47. 56464 |
| PLEKHA5      | 1. 304629 | 3. 299758 | 20. 08523 | 1. 76E-58  | 1. 59E-57  | 120. 774  |
| AEBP2        | 1. 385197 | 2. 838565 | 23. 03821 | 1. 02E-69  | 1. 26E-68  | 146. 6694 |
| RECQL        | 1. 724938 | 2. 937067 | 22. 65674 | 2. 78E-68  | 3. 28E-67  | 143. 3639 |
| GOLT1B       | 1. 023228 | 3. 83506  | 15. 60558 | 3. 84E-41  | 2. 36E-40  | 80. 85453 |
| SPX          | -3. 52592 | 2. 260545 | -37. 2773 | 5. 65E-118 | 6. 99E-116 | 257. 9946 |
| CMAS         | 1. 158291 | 4. 193095 | 18. 47149 | 3. 05E-52  | 2. 38E-51  | 106. 4042 |
| ETNK1        | 1. 478298 | 3. 322285 | 20. 99218 | 5. 82E-62  | 5. 75E-61  | 128. 7955 |
| BCAT1        | -1. 01    | 3. 124035 | -11. 2889 | 4. 51E-25  | 2. 00E-24  | 43. 94109 |
| KRAS         | 1. 665707 | 2. 938983 | 24. 94838 | 8. 43E-77  | 1. 30E-75  | 163. 0041 |
| RASSF8       | 1. 433134 | 1. 893564 | 20. 53034 | 3. 43E-60  | 3. 24E-59  | 124. 717  |
| BHLHE41      | 2. 533818 | 2. 985299 | 29. 59256 | 2. 87E-93  | 8. 54E-92  | 200. 9878 |
| SSPN         | 2. 409933 | 2. 251773 | 31. 43151 | 1. 80E-99  | 7. 30E-98  | 215. 2956 |
| ASUN         | 1. 330689 | 3. 139617 | 24. 24344 | 3. 32E-74  | 4. 70E-73  | 157. 0198 |
| FGFR10P2     | 1. 320793 | 3. 543839 | 21. 02871 | 4. 22E-62  | 4. 19E-61  | 129. 1175 |
| MED21        | 1. 681269 | 3. 600623 | 29. 05457 | 2. 03E-91  | 5. 54E-90  | 196. 7221 |



|              |          |          |          |           |           |          |
|--------------|----------|----------|----------|-----------|-----------|----------|
| STK38L       | 2.085143 | 3.326934 | 27.84211 | 3.40E-87  | 7.56E-86  | 186.9768 |
| ARNTL2       | 2.649761 | 1.829941 | 35.62015 | 6.52E-113 | 5.88E-111 | 246.3124 |
| MRPS35       | 2.134397 | 4.185525 | 35.32969 | 5.20E-112 | 4.43E-110 | 244.231  |
| PTHLH        | 2.45519  | 1.456324 | 28.52943 | 1.34E-89  | 3.33E-88  | 192.5235 |
| FAR2         | 2.258322 | 1.697823 | 37.09996 | 1.94E-117 | 2.31E-115 | 256.7597 |
| ERGIC2       | 1.306403 | 4.75875  | 18.93801 | 4.75E-54  | 3.86E-53  | 110.5674 |
| LINC00941    | 1.867439 | 1.091186 | 22.49675 | 1.12E-67  | 1.29E-66  | 141.9737 |
| TSPAN11      | 1.30237  | 1.037568 | 18.66122 | 5.61E-53  | 4.44E-52  | 108.098  |
| P11-627K11.  | 1.141381 | 0.928203 | 14.10567 | 2.06E-35  | 1.13E-34  | 67.67731 |
| FAM60A       | 1.939552 | 4.076464 | 23.20024 | 2.53E-70  | 3.18E-69  | 148.0693 |
| P11-467L13.  | 1.093561 | 0.974435 | 20.42481 | 8.71E-60  | 8.14E-59  | 123.7832 |
| KIAA1551     | 2.253621 | 3.823578 | 28.644   | 5.35E-90  | 1.36E-88  | 193.4424 |
| BICD1        | 2.41878  | 2.046292 | 38.23351 | 7.86E-121 | 1.16E-118 | 264.588  |
| RP11-817I4.1 | 1.129858 | 0.677202 | 31.26905 | 6.26E-99  | 2.46E-97  | 214.0487 |
| FGD4         | 1.12674  | 2.33864  | 17.45988 | 2.56E-48  | 1.84E-47  | 97.36713 |
| DNM1L        | 1.155798 | 3.897524 | 18.53382 | 1.75E-52  | 1.37E-51  | 106.9607 |
| YARS2        | 1.758388 | 3.147345 | 32.29954 | 2.47E-102 | 1.18E-100 | 221.902  |
| PKP2         | 1.331953 | 3.080518 | 14.57912 | 3.29E-37  | 1.88E-36  | 71.80986 |
| CPNE8        | 1.486533 | 2.006103 | 24.02617 | 2.12E-73  | 2.92E-72  | 155.1648 |
| CNTN1        | 1.870697 | 1.595224 | 20.00187 | 3.69E-58  | 3.31E-57  | 120.0343 |
| PPHLN1       | 1.586222 | 4.066517 | 27.60821 | 2.27E-86  | 4.89E-85  | 185.076  |
| ZCRB1        | 1.443611 | 4.580259 | 24.55504 | 2.35E-75  | 3.46E-74  | 159.6716 |
| PRICKLE1     | 1.72022  | 1.623652 | 22.24843 | 9.67E-67  | 1.09E-65  | 139.8114 |
| TWF1         | 1.925387 | 4.382834 | 27.30308 | 2.72E-85  | 5.61E-84  | 182.5864 |
| TMEM117      | 1.243071 | 1.587124 | 30.77536 | 2.80E-97  | 1.02E-95  | 210.2392 |
| PLEKHA8P1    | 1.263193 | 1.672233 | 22.03885 | 6.01E-66  | 6.63E-65  | 137.9823 |
| ANO6         | 1.73387  | 3.417886 | 26.26492 | 1.39E-81  | 2.51E-80  | 174.0323 |
| SCAF11       | 1.262774 | 4.064353 | 20.52596 | 3.56E-60  | 3.36E-59  | 124.6782 |
| SLC38A1      | 1.185835 | 3.409973 | 15.94477 | 1.89E-42  | 1.20E-41  | 83.86289 |
| AMIGO2       | 3.221953 | 2.757072 | 33.65016 | 1.04E-106 | 6.42E-105 | 231.9945 |
| PCED1B       | 2.458667 | 2.160807 | 36.90043 | 7.78E-117 | 8.98E-115 | 255.3662 |
| PCED1B-AS1   | 2.735407 | 2.464026 | 28.67007 | 4.35E-90  | 1.11E-88  | 193.6513 |
| RPAP3        | 1.519862 | 2.970679 | 29.62368 | 2.25E-93  | 6.71E-92  | 201.2335 |
| RAPGEF3      | 1.076633 | 3.063492 | 11.59023 | 3.86E-26  | 1.76E-25  | 46.38922 |
| HDAC7        | 1.847508 | 4.537297 | 25.05304 | 3.49E-77  | 5.44E-76  | 163.888  |
| VDR          | 2.984767 | 2.259239 | 47.24656 | 1.22E-145 | 1.17E-142 | 321.8482 |
| SENP1        | 1.07498  | 1.912965 | 23.17201 | 3.23E-70  | 4.04E-69  | 147.8255 |
| PFKM         | 1.873296 | 3.65301  | 25.08813 | 2.60E-77  | 4.07E-76  | 164.184  |
| CCDC184      | 1.111007 | 0.845839 | 20.7111  | 6.94E-61  | 6.69E-60  | 126.3149 |
| RP11-579D7.2 | 1.37443  | 0.772795 | 16.59426 | 5.82E-45  | 3.89E-44  | 89.64176 |
| CACNB3       | 2.759281 | 2.858783 | 37.00942 | 3.64E-117 | 4.25E-115 | 256.1279 |
| DDX23        | 1.092464 | 4.944937 | 16.65302 | 3.45E-45  | 2.32E-44  | 90.16547 |
| RND1         | 2.226545 | 2.028299 | 22.18341 | 1.70E-66  | 1.91E-65  | 139.2444 |
| FKBP11       | -1.15638 | 6.226428 | -13.5407 | 2.77E-33  | 1.46E-32  | 62.78763 |
| ARF3         | 2.154932 | 4.934744 | 31.20407 | 1.03E-98  | 4.02E-97  | 213.549  |
| PRKAG1       | 1.155241 | 4.642925 | 20.13048 | 1.18E-58  | 1.07E-57  | 121.1753 |
| TUBA1B       | 3.116616 | 7.369926 | 32.22466 | 4.35E-102 | 2.04E-100 | 221.3358 |
| P11-386G11.1 | 3.013135 | 4.160243 | 15.01912 | 6.86E-39  | 4.05E-38  | 75.6744  |
| TUBA1A       | 3.055321 | 5.570115 | 27.84052 | 3.44E-87  | 7.66E-86  | 186.9639 |
| TUBA1C       | 3.221696 | 5.992844 | 33.28718 | 1.53E-105 | 8.82E-104 | 229.3044 |
| P11-161H23.  | 3.586844 | 5.054833 | 38.85582 | 1.15E-122 | 1.94E-120 | 268.8225 |
| PRPH         | 1.03385  | 1.429094 | 9.293435 | 2.47E-18  | 9.48E-18  | 28.51999 |
| TROAP        | 2.439028 | 1.635092 | 34.34443 | 6.44E-109 | 4.56E-107 | 237.0946 |
| DNAJC22      | 1.185637 | 2.513487 | 16.56432 | 7.61E-45  | 5.06E-44  | 89.37489 |

|              |          |          |          |           |           |          |
|--------------|----------|----------|----------|-----------|-----------|----------|
| SPATS2       | 1.291631 | 3.040029 | 22.82436 | 6.51E-69  | 7.81E-68  | 144.818  |
| MCRS1        | 1.008365 | 4.753534 | 17.45912 | 2.58E-48  | 1.85E-47  | 97.36039 |
| FMNL3        | 2.119476 | 2.198595 | 31.54034 | 7.85E-100 | 3.24E-98  | 216.1291 |
| TMBIM6       | 1.706392 | 7.64532  | 21.841   | 3.39E-65  | 3.66E-64  | 136.2523 |
| NCKAP5L      | 1.084852 | 2.604386 | 17.03855 | 1.11E-46  | 7.66E-46  | 93.60474 |
| FAIM2        | 1.241216 | 1.28191  | 14.30696 | 3.56E-36  | 1.99E-35  | 69.4307  |
| RP11-469H8.6 | 1.620454 | 1.097947 | 20.76662 | 4.25E-61  | 4.12E-60  | 126.8053 |
| AQP5         | 4.589267 | 2.912931 | 31.8701  | 6.37E-101 | 2.80E-99  | 218.6454 |
| RACGAP1      | 2.44443  | 2.021159 | 40.56677 | 1.30E-127 | 3.00E-125 | 280.2394 |
| GPD1         | 1.366786 | 1.713659 | 12.11177 | 5.16E-28  | 2.45E-27  | 50.68678 |
| COX14        | 1.681778 | 5.090462 | 26.64806 | 5.87E-83  | 1.11E-81  | 177.2042 |
| CERS5        | 1.651841 | 4.286036 | 26.56605 | 1.15E-82  | 2.17E-81  | 176.5267 |
| LIMA1        | 2.394383 | 4.800918 | 28.41425 | 3.37E-89  | 8.24E-88  | 191.598  |
| DIP2B        | 1.440911 | 2.395681 | 25.69367 | 1.62E-79  | 2.72E-78  | 169.2714 |
| ATF1         | 1.612153 | 3.017975 | 24.85426 | 1.87E-76  | 2.85E-75  | 162.2082 |
| TFCP2        | 1.305889 | 3.155395 | 23.33771 | 7.74E-71  | 9.84E-70  | 149.2549 |
| DAZAP2       | 1.97243  | 6.722072 | 25.30562 | 4.17E-78  | 6.73E-77  | 166.016  |
| SMAGP        | 2.435088 | 3.958072 | 29.39081 | 1.41E-92  | 4.05E-91  | 199.3924 |
| BIN2         | 1.791156 | 1.621777 | 22.59474 | 4.76E-68  | 5.57E-67  | 142.8255 |
| GALNT6       | 1.902679 | 2.612358 | 23.5102  | 1.76E-71  | 2.27E-70  | 150.74   |
| ACVRL1       | 1.218598 | 3.21655  | 16.64219 | 3.80E-45  | 2.55E-44  | 90.06898 |
| NR4A1        | 1.211241 | 5.115712 | 7.221757 | 3.83E-12  | 1.25E-11  | 14.42461 |
| P11-1100L3.  | 2.109745 | 2.03889  | 12.81488 | 1.39E-30  | 6.92E-30  | 56.5876  |
| ATG101       | 1.806073 | 4.427139 | 29.98549 | 1.31E-94  | 4.18E-93  | 204.0806 |
| P11-1100L3.  | 2.092141 | 3.092782 | 26.45847 | 2.81E-82  | 5.20E-81  | 175.6368 |
| KRT80        | 1.719254 | 2.820252 | 15.97712 | 1.42E-42  | 9.01E-42  | 84.15019 |
| KRT7         | 4.191901 | 6.938356 | 30.97984 | 5.78E-98  | 2.17E-96  | 211.8207 |
| AC021066.1   | 3.793808 | 4.268452 | 12.15091 | 3.73E-28  | 1.77E-27  | 51.01218 |
| RP3-416H24.1 | 1.115192 | 1.866662 | 11.59393 | 3.75E-26  | 1.71E-25  | 46.41941 |
| KRT81        | 1.138891 | 0.661124 | 10.4609  | 3.36E-22  | 1.40E-21  | 37.36235 |
| KRT6B        | 3.060802 | 1.767594 | 23.08835 | 6.65E-70  | 8.22E-69  | 147.1028 |
| AC055736.2   | 1.82486  | 1.030381 | 10.12641 | 4.55E-21  | 1.86E-20  | 34.7732  |
| KRT6A        | 3.195476 | 2.384191 | 15.65327 | 2.51E-41  | 1.55E-40  | 81.27701 |
| AC055736.3   | 2.185941 | 1.563642 | 8.670185 | 2.26E-16  | 8.26E-16  | 24.04356 |
| KRT5         | 1.899752 | 2.375738 | 9.623126 | 2.11E-19  | 8.32E-19  | 30.96004 |
| KRT8         | 2.468935 | 9.123076 | 21.78668 | 5.44E-65  | 5.86E-64  | 135.7767 |
| KRT18        | 2.039696 | 8.630872 | 18.84398 | 1.10E-53  | 8.85E-53  | 109.7287 |
| IGFBP6       | 2.537349 | 5.024566 | 20.45623 | 6.60E-60  | 6.18E-59  | 124.0613 |
| CSAD         | -1.02381 | 4.067462 | -11.5458 | 5.56E-26  | 2.52E-25  | 46.02682 |
| ITGB7        | 1.886583 | 1.584217 | 28.57341 | 9.42E-90  | 2.36E-88  | 192.8764 |
| RARG         | 2.58653  | 3.467651 | 32.2805  | 2.85E-102 | 1.36E-100 | 221.7581 |
| MFSD5        | 1.626003 | 3.958774 | 29.93466 | 1.95E-94  | 6.14E-93  | 203.6816 |
| ESPL1        | 1.204843 | 0.784106 | 28.79845 | 1.56E-90  | 4.07E-89  | 194.6786 |
| PFDN5        | 1.180711 | 8.741952 | 13.95261 | 7.82E-35  | 4.25E-34  | 66.34785 |
| C12orf10     | 1.103949 | 4.922255 | 17.17305 | 3.32E-47  | 2.33E-46  | 94.80549 |
| SP1          | 1.547266 | 3.664434 | 23.65394 | 5.12E-72  | 6.71E-71  | 151.9755 |
| AMHR2        | -1.55639 | 1.263099 | -21.6277 | 2.19E-64  | 2.32E-63  | 134.3835 |
| PRR13        | 2.303844 | 6.731385 | 29.48054 | 6.94E-93  | 2.02E-91  | 200.1026 |
| ATF7         | 1.185211 | 3.441622 | 20.37409 | 1.36E-59  | 1.27E-58  | 123.3342 |
| ATP5G2       | 1.273627 | 8.312432 | 15.38147 | 2.79E-40  | 1.69E-39  | 78.8715  |
| HOXC10       | 1.522658 | 0.823414 | 12.00274 | 1.28E-27  | 6.02E-27  | 49.78234 |
| HOXC6        | 1.668482 | 1.05531  | 25.1744  | 1.26E-77  | 1.99E-76  | 164.9113 |
| HOXC9        | 1.601796 | 0.85054  | 20.92968 | 1.01E-61  | 9.92E-61  | 128.2444 |
| HOXC4        | 1.784665 | 1.041503 | 34.38135 | 4.92E-109 | 3.50E-107 | 237.3641 |

|               |           |           |           |            |            |           |
|---------------|-----------|-----------|-----------|------------|------------|-----------|
| P11-834C11.   | 2. 482831 | 2. 52614  | 26. 77926 | 1. 99E-83  | 3. 85E-82  | 178. 2863 |
| SMUG1         | 1. 488403 | 4. 435509 | 25. 30445 | 4. 21E-78  | 6. 79E-77  | 166. 0061 |
| CBX5          | 1. 130572 | 2. 850112 | 21. 5284  | 5. 23E-64  | 5. 47E-63  | 133. 5124 |
| HNRNPA1       | 1. 2455   | 8. 921277 | 13. 16764 | 6. 84E-32  | 3. 51E-31  | 59. 58854 |
| COPZ1         | 1. 00891  | 6. 287963 | 14. 46712 | 8. 78E-37  | 4. 96E-36  | 70. 82966 |
| ZNF385A       | 2. 589893 | 2. 567122 | 34. 83739 | 1. 80E-110 | 1. 39E-108 | 240. 68   |
| ITGA5         | 2. 603095 | 4. 537248 | 24. 53172 | 2. 86E-75  | 4. 21E-74  | 159. 4735 |
| NCKAP1L       | 2. 150261 | 1. 890466 | 23. 53847 | 1. 38E-71  | 1. 78E-70  | 150. 9832 |
| PDE1B         | 1. 369609 | 1. 615213 | 20. 35907 | 1. 56E-59  | 1. 45E-58  | 123. 2012 |
| TESPA1        | 1. 194158 | 0. 76856  | 18. 22799 | 2. 68E-51  | 2. 05E-50  | 104. 2296 |
| METTL7B       | 2. 855401 | 2. 33804  | 34. 64947 | 7. 01E-110 | 5. 25E-108 | 239. 3167 |
| BLOC1S1       | 2. 118224 | 6. 316558 | 30. 73547 | 3. 82E-97  | 1. 37E-95  | 209. 93   |
| RDH5          | 1. 214908 | 2. 425884 | 15. 54016 | 6. 85E-41  | 4. 20E-40  | 80. 2753  |
| CD63          | 2. 197211 | 9. 412551 | 25. 06973 | 3. 03E-77  | 4. 74E-76  | 164. 0287 |
| GDF11         | 1. 104017 | 1. 200243 | 22. 66703 | 2. 54E-68  | 3. 00E-67  | 143. 4533 |
| SARNP         | 2. 036186 | 5. 024197 | 32. 05378 | 1. 58E-101 | 7. 17E-100 | 220. 0412 |
| ORMDL2        | 2. 230318 | 4. 737179 | 32. 94003 | 2. 03E-104 | 1. 09E-102 | 226. 7163 |
| DNAJC14       | 1. 367299 | 3. 241503 | 21. 58848 | 3. 09E-64  | 3. 25E-63  | 134. 0396 |
| MMP19         | 2. 05233  | 2. 665775 | 18. 62749 | 7. 58E-53  | 5. 99E-52  | 107. 7969 |
| WIBG          | 1. 708178 | 4. 271556 | 32. 65413 | 1. 72E-103 | 8. 79E-102 | 224. 5736 |
| DGKA          | 1. 501878 | 4. 787988 | 18. 0879  | 9. 38E-51  | 7. 05E-50  | 102. 9781 |
| CDK2          | 1. 469884 | 3. 564927 | 21. 20753 | 8. 75E-63  | 8. 86E-62  | 130. 6923 |
| RAB5B         | 1. 551088 | 5. 158677 | 24. 07403 | 1. 41E-73  | 1. 95E-72  | 155. 5738 |
| ERBB3         | 1. 422459 | 5. 248036 | 16. 33343 | 5. 95E-44  | 3. 89E-43  | 87. 3185  |
| PA2G4         | 1. 308463 | 5. 509566 | 18. 13596 | 6. 10E-51  | 4. 61E-50  | 103. 4075 |
| P11-603J24. 1 | 1. 193337 | 2. 279043 | 22. 10321 | 3. 43E-66  | 3. 81E-65  | 138. 5444 |
| MYL6B         | 2. 376329 | 4. 308246 | 35. 70242 | 3. 63E-113 | 3. 33E-111 | 246. 9    |
| MYL6          | 2. 534893 | 9. 762021 | 25. 91625 | 2. 52E-80  | 4. 36E-79  | 171. 1309 |
| RNF41         | 1. 277664 | 3. 552276 | 19. 85269 | 1. 39E-57  | 1. 23E-56  | 118. 7098 |
| NABP2         | 1. 097826 | 4. 235401 | 20. 00635 | 3. 55E-58  | 3. 18E-57  | 120. 0741 |
| SLC39A5       | -4. 42138 | 5. 241226 | -28. 8048 | 1. 48E-90  | 3. 88E-89  | 194. 729  |
| CNPY2         | 1. 204961 | 6. 307765 | 18. 03774 | 1. 47E-50  | 1. 10E-49  | 102. 53   |
| PAN2          | -1. 38988 | 4. 704594 | -16. 4743 | 1. 70E-44  | 1. 12E-43  | 88. 57318 |
| IL23A         | 1. 546256 | 1. 257483 | 23. 46776 | 2. 53E-71  | 3. 26E-70  | 150. 375  |
| GLS2          | -3. 03446 | 2. 967016 | -29. 4652 | 7. 83E-93  | 2. 27E-91  | 199. 9816 |
| RBMS2         | 1. 601118 | 2. 605555 | 25. 51858 | 6. 99E-79  | 1. 15E-77  | 167. 8046 |
| ATP5B         | 1. 521931 | 7. 664751 | 19. 64762 | 8. 58E-57  | 7. 45E-56  | 116. 8873 |
| PTGES3        | 1. 775373 | 6. 365266 | 23. 32505 | 8. 64E-71  | 1. 10E-69  | 149. 1458 |
| NACA          | 1. 114279 | 9. 752365 | 19. 78936 | 2. 43E-57  | 2. 14E-56  | 118. 1471 |
| HSD17B6       | 1. 839055 | 1. 066478 | 26. 0036  | 1. 22E-80  | 2. 13E-79  | 171. 8591 |
| MYO1A         | 2. 407842 | 1. 347417 | 18. 89422 | 7. 02E-54  | 5. 68E-53  | 110. 1769 |
| NAB2          | 2. 250994 | 2. 945878 | 32. 47948 | 6. 38E-103 | 3. 15E-101 | 223. 2597 |
| STAT6         | 1. 147156 | 5. 780583 | 13. 49647 | 4. 06E-33  | 2. 13E-32  | 62. 40726 |
| LRP1          | 2. 889754 | 4. 982338 | 31. 86848 | 6. 45E-101 | 2. 83E-99  | 218. 6331 |
| NDUFA4L2      | 1. 665636 | 3. 428701 | 17. 9493  | 3. 23E-50  | 2. 41E-49  | 101. 7398 |
| STAC3         | 1. 452325 | 1. 463777 | 28. 07225 | 5. 29E-88  | 1. 22E-86  | 188. 8405 |
| GLI1          | 1. 898343 | 1. 441784 | 26. 46511 | 2. 66E-82  | 4. 93E-81  | 175. 6917 |
| ARHGAP9       | 1. 804314 | 2. 701646 | 17. 74662 | 1. 98E-49  | 1. 45E-48  | 99. 92897 |
| DDIT3         | 1. 470265 | 4. 524051 | 16. 4756  | 1. 68E-44  | 1. 11E-43  | 88. 58447 |
| PIP4K2C       | 1. 640697 | 3. 881841 | 25. 53879 | 5. 90E-79  | 9. 77E-78  | 167. 9741 |
| ARHGEF25      | 1. 413896 | 3. 055099 | 17. 43068 | 3. 33E-48  | 2. 38E-47  | 97. 10637 |
| B4GALNT1      | 1. 190317 | 0. 978768 | 21. 11528 | 1. 97E-62  | 1. 97E-61  | 129. 8801 |
| OS9           | 1. 085289 | 7. 048985 | 15. 38146 | 2. 79E-40  | 1. 69E-39  | 78. 87147 |
| AGAP2         | 1. 026378 | 1. 013492 | 18. 24647 | 2. 27E-51  | 1. 74E-50  | 104. 3946 |

|               |           |           |           |            |            |           |
|---------------|-----------|-----------|-----------|------------|------------|-----------|
| AGAP2-AS1     | 1. 468239 | 3. 206663 | 20. 96804 | 7. 20E-62  | 7. 11E-61  | 128. 5826 |
| TSPAN31       | 1. 388321 | 4. 683852 | 19. 59171 | 1. 41E-56  | 1. 22E-55  | 116. 39   |
| CDK4          | 1. 387259 | 5. 56267  | 20. 24024 | 4. 46E-59  | 4. 09E-58  | 122. 1484 |
| 9-Mar         | 1. 033639 | 3. 525461 | 16. 3941  | 3. 47E-44  | 2. 28E-43  | 87. 85862 |
| TSM           | 1. 640305 | 3. 756994 | 30. 78894 | 2. 52E-97  | 9. 20E-96  | 210. 3444 |
| P11-620J15.   | 1. 100998 | 2. 502623 | 17. 28222 | 1. 25E-47  | 8. 85E-47  | 95. 78036 |
| P11-631N16.   | 1. 231506 | 2. 064726 | 13. 13443 | 9. 09E-32  | 4. 66E-31  | 59. 30497 |
| PPM1H         | 1. 223108 | 1. 79395  | 21. 93285 | 1. 52E-65  | 1. 66E-64  | 137. 0559 |
| TBK1          | 1. 419515 | 2. 867468 | 25. 37109 | 2. 41E-78  | 3. 91E-77  | 166. 5664 |
| RASSF3        | 1. 78432  | 3. 316448 | 28. 35841 | 5. 28E-89  | 1. 28E-87  | 191. 1487 |
| RP11-629N8. 5 | 1. 42038  | 1. 573711 | 15. 24347 | 9. 47E-40  | 5. 68E-39  | 77. 65249 |
| GNS           | 2. 269946 | 4. 348224 | 32. 29167 | 2. 62E-102 | 1. 25E-100 | 221. 8425 |
| MSRB3         | 2. 417003 | 2. 470389 | 26. 50539 | 1. 90E-82  | 3. 55E-81  | 176. 0251 |
| HMGA2         | 1. 488317 | 0. 95387  | 14. 56382 | 3. 76E-37  | 2. 14E-36  | 71. 67584 |
| LLPH          | 1. 775577 | 3. 482728 | 32. 74268 | 8. 85E-104 | 4. 61E-102 | 225. 2384 |
| TMBIM4        | -1. 22184 | 1. 707744 | -8. 31126 | 2. 80E-15  | 9. 99E-15  | 21. 55258 |
| IRAK3         | 1. 452922 | 1. 543394 | 22. 01789 | 7. 22E-66  | 7. 94E-65  | 137. 7992 |
| CAND1         | 1. 247112 | 4. 181088 | 18. 78418 | 1. 87E-53  | 1. 50E-52  | 109. 1952 |
| DYRK2         | 2. 117814 | 2. 598535 | 36. 45581 | 1. 75E-115 | 1. 87E-113 | 252. 2441 |
| RAP1B         | 1. 987082 | 5. 487173 | 25. 94798 | 1. 94E-80  | 3. 36E-79  | 171. 3955 |
| NUP107        | 1. 103436 | 3. 410896 | 17. 35064 | 6. 80E-48  | 4. 82E-47  | 96. 39143 |
| MDM2          | 1. 03211  | 4. 463855 | 12. 74517 | 2. 51E-30  | 1. 24E-29  | 55. 99759 |
| RP11-61102. 5 | 1. 267015 | 1. 213019 | 16. 32574 | 6. 37E-44  | 4. 16E-43  | 87. 25005 |
| CPM           | 1. 647435 | 2. 549868 | 17. 45733 | 2. 62E-48  | 1. 88E-47  | 97. 34443 |
| CPSF6         | 1. 203638 | 3. 892469 | 20. 86107 | 1. 85E-61  | 1. 81E-60  | 127. 639  |
| LYZ           | 5. 862258 | 6. 59328  | 33. 99114 | 8. 52E-108 | 5. 58E-106 | 234. 5067 |
| P11-1143G9.   | 4. 675024 | 3. 232153 | 20. 42393 | 8. 78E-60  | 8. 20E-59  | 123. 7754 |
| FRS2          | 1. 156036 | 2. 049233 | 19. 22083 | 3. 82E-55  | 3. 19E-54  | 113. 0884 |
| CCT2          | 1. 294236 | 5. 461381 | 14. 39497 | 1. 65E-36  | 9. 26E-36  | 70. 19902 |
| CNOT2         | 1. 268866 | 4. 163593 | 19. 99044 | 4. 09E-58  | 3. 66E-57  | 119. 9329 |
| KCNMB4        | 1. 207366 | 0. 922882 | 20. 09974 | 1. 55E-58  | 1. 40E-57  | 120. 9027 |
| PTPRB         | 1. 360658 | 1. 890717 | 20. 73238 | 5. 75E-61  | 5. 56E-60  | 126. 5029 |
| PTPRR         | 2. 171451 | 1. 14907  | 26. 53676 | 1. 47E-82  | 2. 75E-81  | 176. 2845 |
| TSPAN8        | 4. 517791 | 5. 949177 | 33. 52255 | 2. 68E-106 | 1. 61E-104 | 231. 0506 |
| LGR5          | 1. 342401 | 0. 693516 | 15. 9246  | 2. 26E-42  | 1. 43E-41  | 83. 68379 |
| TMEM19        | 1. 764817 | 2. 839558 | 27. 31997 | 2. 37E-85  | 4. 91E-84  | 182. 7245 |
| RAB21         | 1. 626281 | 3. 643515 | 22. 69317 | 2. 03E-68  | 2. 40E-67  | 143. 6802 |
| TRHDE         | -1. 2356  | 1. 191073 | -18. 1282 | 6. 54E-51  | 4. 94E-50  | 103. 3381 |
| TRHDE-AS1     | -1. 85094 | 1. 649282 | -26. 3579 | 6. 45E-82  | 1. 18E-80  | 174. 8038 |
| ATXN7L3B      | 1. 241634 | 3. 485505 | 21. 76662 | 6. 49E-65  | 6. 96E-64  | 135. 601  |
| GLIPR1        | 2. 736344 | 2. 555021 | 29. 28217 | 3. 33E-92  | 9. 42E-91  | 198. 5312 |
| KRR1          | 1. 213723 | 3. 656575 | 19. 93017 | 6. 97E-58  | 6. 21E-57  | 119. 3979 |
| PHLDA1        | 2. 677349 | 3. 539323 | 29. 56406 | 3. 59E-93  | 1. 06E-91  | 200. 7627 |
| NAP1L1        | 1. 668277 | 6. 959492 | 20. 97224 | 6. 94E-62  | 6. 85E-61  | 128. 6196 |
| OSBPL8        | 1. 612235 | 2. 615632 | 23. 16891 | 3. 32E-70  | 4. 15E-69  | 147. 7988 |
| CSRP2         | 1. 469684 | 3. 549303 | 18. 15163 | 5. 31E-51  | 4. 02E-50  | 103. 5475 |
| PPP1R12A      | 1. 26079  | 3. 177368 | 17. 5464  | 1. 18E-48  | 8. 53E-48  | 98. 14012 |
| CCDC59        | 1. 262689 | 4. 156901 | 21. 23355 | 6. 96E-63  | 7. 07E-62  | 130. 9213 |
| TMTC2         | 1. 158695 | 2. 291647 | 18. 6786  | 4. 80E-53  | 3. 81E-52  | 108. 253  |
| TMTC3         | 1. 296905 | 1. 481594 | 26. 98254 | 3. 75E-84  | 7. 44E-83  | 179. 959  |
| KITLG         | 2. 090154 | 2. 338972 | 23. 72768 | 2. 72E-72  | 3. 61E-71  | 152. 6084 |
| DUSP6         | 3. 187357 | 4. 034955 | 36. 85691 | 1. 05E-116 | 1. 21E-114 | 255. 0616 |
| POC1B         | 1. 988971 | 2. 576217 | 30. 95839 | 6. 83E-98  | 2. 56E-96  | 211. 655  |
| GALNT4        | 2. 678714 | 2. 42271  | 30. 16934 | 3. 11E-95  | 1. 02E-93  | 205. 521  |

|              |          |          |          |           |           |          |
|--------------|----------|----------|----------|-----------|-----------|----------|
| ATP2B1       | 1.231336 | 2.886038 | 18.3502  | 9.01E-52  | 6.95E-51  | 105.3211 |
| EPYC         | 1.849422 | 0.888823 | 14.11587 | 1.89E-35  | 1.04E-34  | 67.76604 |
| LUM          | 5.050447 | 7.250225 | 37.0528  | 2.69E-117 | 3.17E-115 | 256.4308 |
| DCN          | 3.085276 | 7.228318 | 22.87198 | 4.31E-69  | 5.21E-68  | 145.2307 |
| BTG1         | 1.129405 | 5.424242 | 13.14192 | 8.53E-32  | 4.37E-31  | 59.36892 |
| P11-486A14.  | 1.22445  | 0.592822 | 19.06233 | 1.57E-54  | 1.29E-53  | 111.6759 |
| NUDT4        | 1.784925 | 4.645654 | 23.49419 | 2.02E-71  | 2.60E-70  | 150.6023 |
| UBE2N        | 2.227301 | 4.725509 | 32.6008  | 2.56E-103 | 1.30E-101 | 224.1728 |
| MRPL42       | 1.779474 | 3.800495 | 28.17389 | 2.33E-88  | 5.46E-87  | 189.6615 |
| PLXNC1       | 2.035002 | 1.664149 | 27.57328 | 3.01E-86  | 6.45E-85  | 184.7916 |
| TMCC3        | 1.853338 | 1.578319 | 30.24613 | 1.71E-95  | 5.66E-94  | 206.1214 |
| NDUFA12      | 1.956049 | 5.380211 | 29.26717 | 3.75E-92  | 1.06E-90  | 198.4121 |
| FGD6         | 1.685036 | 1.975611 | 26.49962 | 2.00E-82  | 3.72E-81  | 175.9773 |
| VEZT         | 1.647552 | 4.140292 | 24.68779 | 7.63E-76  | 1.14E-74  | 160.7982 |
| SNRPF        | 2.116466 | 3.930155 | 35.13202 | 2.15E-111 | 1.77E-109 | 242.8087 |
| LTA4H        | 1.18142  | 5.075243 | 16.72069 | 1.89E-45  | 1.27E-44  | 90.76882 |
| ELK3         | 2.892238 | 3.055612 | 40.45881 | 2.64E-127 | 5.96E-125 | 279.5287 |
| CDK17        | 1.248575 | 2.598434 | 19.50226 | 3.12E-56  | 2.68E-55  | 115.5943 |
| NEDD1        | 1.247488 | 2.065936 | 23.03916 | 1.02E-69  | 1.25E-68  | 146.6776 |
| IKBIP        | 2.066745 | 2.382816 | 32.46889 | 6.90E-103 | 3.39E-101 | 223.1799 |
| APAF1        | 1.201131 | 2.204311 | 22.30427 | 5.95E-67  | 6.74E-66  | 140.2981 |
| UHRF1BP1L    | 1.437665 | 1.769019 | 26.33464 | 7.82E-82  | 1.43E-80  | 174.6108 |
| RP11-135F9.5 | 1.330941 | 1.378115 | 33.16337 | 3.84E-105 | 2.16E-103 | 228.3831 |
| ACTR6        | 1.47246  | 2.823562 | 27.29797 | 2.84E-85  | 5.85E-84  | 182.5446 |
| GAS2L3       | 1.367415 | 1.029314 | 24.48277 | 4.34E-75  | 6.34E-74  | 159.0575 |
| ARL1         | 1.293617 | 4.629689 | 20.1352  | 1.13E-58  | 1.03E-57  | 121.2172 |
| CHPT1        | 1.58584  | 4.15677  | 18.4903  | 2.58E-52  | 2.01E-51  | 106.5722 |
| GNPTAB       | 1.263117 | 3.11255  | 23.17681 | 3.10E-70  | 3.88E-69  | 147.8669 |
| DRAM1        | 1.59256  | 2.875821 | 23.98883 | 2.91E-73  | 3.99E-72  | 154.8455 |
| CCDC53       | 1.849346 | 4.086826 | 31.50924 | 9.96E-100 | 4.08E-98  | 215.8911 |
| NUP37        | 1.764222 | 3.209156 | 31.12476 | 1.90E-98  | 7.29E-97  | 212.9384 |
| PARPBP       | 1.420358 | 0.986833 | 34.72315 | 4.11E-110 | 3.10E-108 | 239.8517 |
| PAH          | -1.10403 | 2.333763 | -7.83258 | 7.24E-14  | 2.49E-13  | 18.33727 |
| GLT8D2       | 2.772547 | 2.444802 | 30.16389 | 3.25E-95  | 1.06E-93  | 205.4784 |
| TXNRD1       | 2.215374 | 3.755669 | 28.60131 | 7.53E-90  | 1.90E-88  | 193.1002 |
| CHST11       | 2.352351 | 2.386605 | 26.25454 | 1.52E-81  | 2.73E-80  | 173.9461 |
| SLC41A2      | 1.360624 | 3.078419 | 17.92288 | 4.10E-50  | 3.04E-49  | 101.5038 |
| ALDH1L2      | -1.63366 | 2.66013  | -18.1133 | 7.48E-51  | 5.64E-50  | 103.2046 |
| C12orf75     | 2.568731 | 5.030093 | 23.24373 | 1.74E-70  | 2.19E-69  | 148.4446 |
| NUAK1        | 1.628712 | 1.909817 | 22.12238 | 2.90E-66  | 3.23E-65  | 138.7117 |
| CKAP4        | 1.802281 | 4.727349 | 27.41882 | 1.06E-85  | 2.23E-84  | 183.5321 |
| TMEM263      | 1.099072 | 3.737293 | 17.22227 | 2.14E-47  | 1.50E-46  | 95.24495 |
| PWP1         | 1.094653 | 4.02678  | 19.12864 | 8.69E-55  | 7.20E-54  | 112.267  |
| CMKLR1       | 1.196106 | 1.547464 | 14.98643 | 9.15E-39  | 5.39E-38  | 75.38657 |
| SART3        | 1.004134 | 3.685516 | 17.12216 | 5.24E-47  | 3.65E-46  | 94.35107 |
| ISCU         | 1.097225 | 5.855514 | 15.7741  | 8.61E-42  | 5.38E-41  | 82.34823 |
| TMEM119      | 3.074657 | 3.259129 | 26.624   | 7.16E-83  | 1.36E-81  | 177.0055 |
| SELPLG       | 3.8455   | 2.697544 | 45.58788 | 2.41E-141 | 1.80E-138 | 311.9343 |
| CORO1C       | 2.632779 | 3.891347 | 35.66421 | 4.76E-113 | 4.33E-111 | 246.6272 |
| SSH1         | 1.443061 | 2.105512 | 23.01162 | 1.29E-69  | 1.58E-68  | 146.4394 |
| USP30-AS1    | 1.249075 | 0.884444 | 22.40729 | 2.43E-67  | 2.78E-66  | 141.1953 |
| ALKBH2       | 1.124164 | 3.530362 | 18.6279  | 7.55E-53  | 5.97E-52  | 107.8006 |
| UNG          | 1.623034 | 3.359491 | 29.83048 | 4.42E-94  | 1.37E-92  | 202.8628 |
| KCTD10       | 2.028186 | 3.430115 | 29.94435 | 1.81E-94  | 5.70E-93  | 203.7577 |

|              |          |          |          |           |           |          |
|--------------|----------|----------|----------|-----------|-----------|----------|
| MVK          | 1.059519 | 2.909877 | 18.54841 | 1.54E-52  | 1.20E-51  | 107.091  |
| TRPV4        | 1.504848 | 2.097816 | 19.99955 | 3.77E-58  | 3.38E-57  | 120.0137 |
| GLTP         | 1.217909 | 3.804247 | 22.26915 | 8.08E-67  | 9.12E-66  | 139.9921 |
| ATP2A2       | 1.822818 | 5.284898 | 22.81832 | 6.86E-69  | 8.23E-68  | 144.7657 |
| ARPC3        | 2.303678 | 7.128327 | 30.15551 | 3.47E-95  | 1.13E-93  | 205.4128 |
| GPN3         | 1.082847 | 3.109184 | 19.97601 | 4.64E-58  | 4.15E-57  | 119.8048 |
| VPS29        | 1.290762 | 5.807162 | 19.20513 | 4.40E-55  | 3.67E-54  | 112.9486 |
| PPTC7        | 1.417572 | 2.661881 | 24.27886 | 2.46E-74  | 3.49E-73  | 157.3218 |
| TCTN1        | 1.221224 | 3.849159 | 19.9902  | 4.10E-58  | 3.66E-57  | 119.9307 |
| HVCN1        | 2.254399 | 1.79797  | 30.78441 | 2.61E-97  | 9.52E-96  | 210.3093 |
| PPP1CC       | 1.024069 | 5.39992  | 14.86881 | 2.58E-38  | 1.51E-37  | 74.35182 |
| SH2B3        | 1.376075 | 2.545342 | 21.67339 | 1.47E-64  | 1.56E-63  | 134.7842 |
| BRAP         | 1.305581 | 2.449509 | 28.89226 | 7.38E-91  | 1.96E-89  | 195.428  |
| ALDH2        | 2.549014 | 5.749334 | 28.91725 | 6.05E-91  | 1.61E-89  | 195.6275 |
| MAPKAPK5-AS1 | 1.399168 | 3.978841 | 23.97799 | 3.19E-73  | 4.37E-72  | 154.7528 |
| ERP29        | 1.189782 | 6.348569 | 19.10944 | 1.03E-54  | 8.54E-54  | 112.0958 |
| TRAFD1       | 1.805827 | 3.42562  | 30.35599 | 7.26E-96  | 2.45E-94  | 206.9791 |
| PTPN11       | 1.436188 | 3.476303 | 21.5898  | 3.05E-64  | 3.21E-63  | 134.0512 |
| OAS1         | 4.316678 | 3.452494 | 42.96598 | 2.57E-134 | 1.09E-131 | 295.7106 |
| OAS3         | 2.928007 | 2.415291 | 33.76222 | 4.58E-107 | 2.88E-105 | 232.8217 |
| OAS2         | 3.552908 | 2.466562 | 30.37064 | 6.48E-96  | 2.19E-94  | 207.0934 |
| DTX1         | 1.942853 | 2.584495 | 26.14742 | 3.69E-81  | 6.57E-80  | 173.0561 |
| RASAL1       | 2.811109 | 2.426367 | 31.9951  | 2.47E-101 | 1.11E-99  | 219.5957 |
| RITA1        | 1.225655 | 2.850702 | 26.69899 | 3.86E-83  | 7.38E-82  | 177.6245 |
| IQCD         | 1.079476 | 0.866835 | 25.41892 | 1.61E-78  | 2.64E-77  | 166.9682 |
| PLBD2        | 1.32837  | 3.799982 | 21.54193 | 4.64E-64  | 4.87E-63  | 133.6311 |
| SDS          | 2.592553 | 1.667791 | 26.4529  | 2.94E-82  | 5.44E-81  | 175.5907 |
| SDSL         | 1.172479 | 3.398896 | 20.87757 | 1.60E-61  | 1.56E-60  | 127.7846 |
| TBX3         | 1.109937 | 1.790999 | 16.43389 | 2.43E-44  | 1.60E-43  | 88.21297 |
| MAP1LC3B2    | 1.368474 | 1.082437 | 28.58183 | 8.81E-90  | 2.21E-88  | 192.9439 |
| C12orf49     | 2.056904 | 3.056988 | 33.86704 | 2.12E-107 | 1.35E-105 | 233.5941 |
| RNFT2        | 1.036307 | 0.81515  | 22.24309 | 1.01E-66  | 1.14E-65  | 139.7649 |
| TESC         | 1.438789 | 6.143459 | 12.44306 | 3.22E-29  | 1.56E-28  | 53.45287 |
| WSB2         | 1.661051 | 4.497774 | 27.22157 | 5.30E-85  | 1.08E-83  | 181.9195 |
| TAOK3        | 1.727082 | 3.258273 | 27.90189 | 2.10E-87  | 4.70E-86  | 187.4615 |
| PRKAB1       | 1.211004 | 4.287251 | 17.70928 | 2.76E-49  | 2.02E-48  | 99.59534 |
| CIT          | 1.252436 | 1.122315 | 23.75325 | 2.18E-72  | 2.91E-71  | 152.8278 |
| CCDC64       | 1.324929 | 2.834757 | 16.03451 | 8.51E-43  | 5.44E-42  | 84.65999 |
| RAB35        | 1.787731 | 3.687292 | 29.81465 | 5.00E-94  | 1.55E-92  | 202.7383 |
| PXN          | 1.981393 | 4.937733 | 26.33937 | 7.52E-82  | 1.37E-80  | 174.65   |
| RNU4-2       | 1.681847 | 3.082057 | 7.106222 | 7.91E-12  | 2.56E-11  | 13.70992 |
| PLA2G1B      | -8.43935 | 9.563952 | -23.0157 | 1.24E-69  | 1.52E-68  | 146.4746 |
| COX6A1       | 1.817727 | 7.680187 | 23.336   | 7.86E-71  | 9.98E-70  | 149.2402 |
| DYNLL1       | 2.402712 | 7.251527 | 31.01779 | 4.32E-98  | 1.64E-96  | 212.1137 |
| NRAV         | 1.20735  | 1.935567 | 26.04383 | 8.73E-81  | 1.53E-79  | 172.1941 |
| COQ5         | 1.131698 | 3.655023 | 21.88097 | 2.39E-65  | 2.59E-64  | 136.602  |
| RNF10        | 1.154187 | 6.119152 | 16.62804 | 4.31E-45  | 2.89E-44  | 89.94279 |
| SPPL3        | 1.410013 | 3.842897 | 23.14753 | 3.99E-70  | 4.97E-69  | 147.6141 |
| C12orf43     | 1.111984 | 2.421757 | 24.72508 | 5.56E-76  | 8.36E-75  | 161.1143 |
| OASL         | 3.629445 | 1.964208 | 37.24415 | 7.12E-118 | 8.71E-116 | 257.7637 |
| CAMKK2       | 1.155834 | 3.422103 | 21.17397 | 1.18E-62  | 1.19E-61  | 130.3969 |
| RNF34        | 1.400855 | 3.60143  | 25.97869 | 1.50E-80  | 2.61E-79  | 171.6515 |
| ORAI1        | 2.057256 | 3.206525 | 36.11997 | 1.87E-114 | 1.90E-112 | 249.8702 |
| RHOF         | 3.13576  | 2.778444 | 37.44247 | 1.80E-118 | 2.31E-116 | 259.1408 |

|              |          |          |          |           |           |          |
|--------------|----------|----------|----------|-----------|-----------|----------|
| PSMD9        | 1.168041 | 5.010957 | 19.28994 | 2.07E-55  | 1.74E-54  | 113.704  |
| AC156455.1   | -2.09174 | 2.620295 | -29.1318 | 1.10E-91  | 3.04E-90  | 197.3364 |
| DIABLO       | 1.749654 | 4.727018 | 28.88075 | 8.09E-91  | 2.14E-89  | 195.3361 |
| VPS33A       | 1.154729 | 2.48475  | 23.48931 | 2.10E-71  | 2.71E-70  | 150.5604 |
| CLIP1        | 1.055378 | 3.613667 | 16.10338 | 4.61E-43  | 2.96E-42  | 85.27205 |
| HCAR2        | 1.056217 | 0.594379 | 14.35164 | 2.41E-36  | 1.35E-35  | 69.82063 |
| DENR         | 1.519708 | 3.834503 | 28.19889 | 1.91E-88  | 4.47E-87  | 189.8632 |
| VPS37B       | 1.745897 | 4.230246 | 23.92161 | 5.17E-73  | 7.02E-72  | 154.2703 |
| ABC9         | 1.293848 | 1.838661 | 22.94934 | 2.21E-69  | 2.69E-68  | 145.9006 |
| C12orf65     | 1.26367  | 2.676563 | 24.95242 | 8.15E-77  | 1.26E-75  | 163.0382 |
| CDK2AP1      | 2.640678 | 5.50209  | 35.98499 | 4.87E-114 | 4.78E-112 | 248.9124 |
| RILPL2       | 1.728042 | 1.653144 | 40.36459 | 4.91E-127 | 1.07E-124 | 278.9073 |
| SNRNP35      | 1.413654 | 3.927608 | 24.72039 | 5.79E-76  | 8.69E-75  | 161.0745 |
| RILPL1       | 1.472482 | 2.149154 | 27.17187 | 7.96E-85  | 1.61E-83  | 181.5124 |
| GTF2H3       | 1.45183  | 2.466935 | 24.82311 | 2.43E-76  | 3.70E-75  | 161.9446 |
| TCTN2        | 1.282902 | 2.448482 | 24.24064 | 3.40E-74  | 4.81E-73  | 156.996  |
| CCDC92       | 1.641696 | 3.914936 | 26.70368 | 3.71E-83  | 7.10E-82  | 177.6632 |
| FAM101A      | 3.882159 | 2.06915  | 39.93693 | 8.28E-126 | 1.68E-123 | 276.0746 |
| NCOR2        | 1.481911 | 5.270738 | 19.20268 | 4.49E-55  | 3.75E-54  | 112.9267 |
| SCARB1       | 1.887446 | 3.671576 | 29.52896 | 4.74E-93  | 1.39E-91  | 200.4854 |
| UBC          | 2.528758 | 8.893318 | 26.69809 | 3.89E-83  | 7.43E-82  | 177.6171 |
| BRI3BP       | 1.40699  | 2.030224 | 25.17389 | 1.26E-77  | 2.00E-76  | 164.907  |
| AACS         | 1.111979 | 3.460377 | 18.47718 | 2.90E-52  | 2.26E-51  | 106.455  |
| RP4-809F18.2 | -1.71392 | 1.111668 | -26.2006 | 2.37E-81  | 4.25E-80  | 173.498  |
| RP4-809F18.1 | -2.11353 | 1.47113  | -26.5224 | 1.66E-82  | 3.09E-81  | 176.1656 |
| SLC15A4      | 1.343123 | 3.480643 | 22.29788 | 6.29E-67  | 7.12E-66  | 140.2424 |
| RAN          | 2.350161 | 7.294636 | 28.47102 | 2.14E-89  | 5.27E-88  | 192.0544 |
| MMP17        | 1.047433 | 1.773303 | 11.52575 | 6.55E-26  | 2.97E-25  | 45.86312 |
| ULK1         | -1.0423  | 4.497247 | -12.4585 | 2.83E-29  | 1.37E-28  | 53.58234 |
| NOC4L        | 1.017901 | 3.616565 | 15.52225 | 8.03E-41  | 4.92E-40  | 80.11674 |
| P13-714J12.  | -1.59131 | 1.916127 | -18.0661 | 1.14E-50  | 8.56E-50  | 102.7832 |
| PGAM5        | 1.106443 | 3.44021  | 19.92481 | 7.31E-58  | 6.51E-57  | 119.3503 |
| ANKLE2       | 1.256661 | 4.396287 | 17.67376 | 3.79E-49  | 2.76E-48  | 99.27794 |
| PSPC1        | 1.5723   | 3.775993 | 28.26457 | 1.12E-88  | 2.67E-87  | 190.3929 |
| ZMYM5        | 1.074406 | 2.351844 | 20.09473 | 1.62E-58  | 1.47E-57  | 120.8582 |
| ZMYM2        | 1.264533 | 4.052749 | 19.41628 | 6.71E-56  | 5.70E-55  | 114.829  |
| GJB2         | 4.81025  | 2.940356 | 38.31032 | 4.65E-121 | 7.00E-119 | 265.113  |
| GJB6         | 1.176261 | 0.620453 | 12.38709 | 5.15E-29  | 2.49E-28  | 52.98365 |
| CRYL1        | 1.134237 | 4.415206 | 15.71565 | 1.45E-41  | 8.98E-41  | 81.82987 |
| N6AMT2       | 1.195798 | 2.390635 | 25.1867  | 1.13E-77  | 1.80E-76  | 165.0149 |
| LATS2        | 1.68645  | 2.244932 | 27.38476 | 1.40E-85  | 2.92E-84  | 183.2539 |
| SAP18        | 1.815732 | 6.19486  | 26.52674 | 1.60E-82  | 2.98E-81  | 176.2017 |
| SKA3         | 1.483027 | 0.837246 | 34.92541 | 9.53E-111 | 7.54E-109 | 241.317  |
| MRPL57       | 1.42146  | 3.499949 | 27.81662 | 4.18E-87  | 9.25E-86  | 186.77   |
| ZDHHC20      | 2.643393 | 3.43145  | 42.21713 | 2.98E-132 | 1.03E-129 | 290.9475 |
| MICU2        | 1.151857 | 4.07664  | 20.56974 | 2.42E-60  | 2.30E-59  | 125.0655 |
| FTH1P7       | 3.307797 | 3.036168 | 52.80703 | 3.01E-159 | 8.28E-156 | 353.2589 |
| TNFRSF19     | 1.457978 | 1.689797 | 19.43509 | 5.68E-56  | 4.83E-55  | 114.9964 |
| MIPEP        | 1.366863 | 3.163216 | 25.23772 | 7.37E-78  | 1.18E-76  | 165.4446 |
| PARP4        | 2.182368 | 3.785825 | 29.94585 | 1.79E-94  | 5.64E-93  | 203.7695 |
| P11-756A22.  | 1.020085 | 0.564021 | 8.908996 | 4.09E-17  | 1.52E-16  | 25.73687 |
| NUPL1        | 1.264835 | 2.891012 | 22.43472 | 1.91E-67  | 2.20E-66  | 141.434  |
| SHISA2       | 2.293699 | 1.259487 | 35.85938 | 1.19E-113 | 1.12E-111 | 248.019  |
| RNF6         | 1.561863 | 3.100581 | 26.72236 | 3.18E-83  | 6.10E-82  | 177.8172 |

|             |           |           |           |            |            |           |
|-------------|-----------|-----------|-----------|------------|------------|-----------|
| USP12       | 1. 11491  | 2. 985846 | 19. 30822 | 1. 76E-55  | 1. 48E-54  | 113. 8668 |
| RASL11A     | 1. 127281 | 2. 311763 | 14. 58816 | 3. 04E-37  | 1. 74E-36  | 71. 88899 |
| GTF3A       | 1. 478804 | 5. 843923 | 24. 28302 | 2. 37E-74  | 3. 37E-73  | 157. 3573 |
| MTIF3       | 1. 129827 | 5. 286962 | 18. 5849  | 1. 11E-52  | 8. 72E-52  | 107. 4167 |
| FLT1        | 1. 491081 | 2. 606438 | 19. 20611 | 4. 36E-55  | 3. 64E-54  | 112. 9573 |
| POMP        | 2. 340495 | 5. 203007 | 38. 68424 | 3. 67E-122 | 5. 90E-120 | 267. 6594 |
| SLC46A3     | 1. 774179 | 2. 873534 | 28. 48179 | 1. 96E-89  | 4. 84E-88  | 192. 1409 |
| MTUS2       | -1. 65914 | 1. 592058 | -22. 8721 | 4. 31E-69  | 5. 20E-68  | 145. 2318 |
| KATNAL1     | 1. 09174  | 1. 214436 | 21. 23405 | 6. 93E-63  | 7. 04E-62  | 130. 9257 |
| LINC00426   | 1. 069601 | 0. 672914 | 17. 98026 | 2. 45E-50  | 1. 83E-49  | 102. 0164 |
| HMGB1       | 2. 07357  | 7. 009862 | 28. 29575 | 8. 74E-89  | 2. 09E-87  | 190. 6442 |
| ALOX5AP     | 3. 392923 | 4. 107844 | 28. 08601 | 4. 74E-88  | 1. 09E-86  | 188. 9517 |
| MEDAG       | 1. 686621 | 2. 134065 | 12. 6882  | 4. 06E-30  | 2. 01E-29  | 55. 51619 |
| HSPH1       | 2. 14097  | 4. 529019 | 24. 15441 | 7. 09E-74  | 9. 93E-73  | 156. 2604 |
| FRY         | 1. 059891 | 3. 31279  | 13. 54583 | 2. 65E-33  | 1. 40E-32  | 62. 83211 |
| PDS5B       | 1. 45451  | 2. 725971 | 24. 42994 | 6. 80E-75  | 9. 86E-74  | 158. 6082 |
| RFC3        | 1. 040112 | 1. 948813 | 20. 45993 | 6. 39E-60  | 5. 98E-59  | 124. 094  |
| SPG20       | 1. 248849 | 3. 355122 | 16. 30608 | 7. 59E-44  | 4. 95E-43  | 87. 07507 |
| POSTN       | 6. 214581 | 4. 023432 | 48. 34691 | 1. 99E-148 | 2. 46E-145 | 328. 2818 |
| FREM2-AS1   | -1. 76185 | 1. 005562 | -19. 8573 | 1. 33E-57  | 1. 18E-56  | 118. 7505 |
| LHFP        | 2. 28373  | 3. 616404 | 23. 93096 | 4. 77E-73  | 6. 49E-72  | 154. 3504 |
| FOXO1       | 1. 200225 | 2. 903429 | 17. 37619 | 5. 42E-48  | 3. 85E-47  | 96. 61957 |
| MRPS31      | 1. 042352 | 3. 293802 | 20. 27132 | 3. 39E-59  | 3. 12E-58  | 122. 4239 |
| ELF1        | 1. 480464 | 4. 262119 | 20. 05114 | 2. 39E-58  | 2. 15E-57  | 120. 4716 |
| WBP4        | 1. 07196  | 2. 282251 | 24. 04096 | 1. 87E-73  | 2. 57E-72  | 155. 2912 |
| NAA16       | -1. 18321 | 3. 299619 | -20. 199  | 6. 44E-59  | 5. 87E-58  | 121. 7824 |
| RGCC        | 1. 970209 | 4. 053595 | 21. 21887 | 7. 92E-63  | 8. 04E-62  | 130. 7921 |
| DGKH        | 1. 366152 | 1. 157059 | 30. 14445 | 3. 78E-95  | 1. 23E-93  | 205. 3263 |
| AKAP11      | 1. 294296 | 2. 321925 | 22. 11608 | 3. 07E-66  | 3. 41E-65  | 138. 6568 |
| TNFSF11     | 2. 104143 | 1. 088524 | 28. 15815 | 2. 65E-88  | 6. 18E-87  | 189. 5345 |
| EPSTI1      | 3. 606644 | 2. 533021 | 41. 31133 | 1. 01E-129 | 2. 81E-127 | 285. 1068 |
| DNAJC15     | 2. 22386  | 3. 113126 | 33. 27647 | 1. 66E-105 | 9. 51E-104 | 229. 2247 |
| ENOX1       | 1. 210571 | 0. 958719 | 22. 9328  | 2. 55E-69  | 3. 09E-68  | 145. 7573 |
| LACC1       | 1. 22792  | 1. 64013  | 25. 87478 | 3. 56E-80  | 6. 14E-79  | 170. 7848 |
| SERP2       | 1. 229304 | 1. 83346  | 19. 72023 | 4. 50E-57  | 3. 94E-56  | 117. 5328 |
| TSC22D1     | 2. 732462 | 5. 295305 | 26. 85414 | 1. 08E-83  | 2. 10E-82  | 178. 903  |
| GPALPP1     | 1. 300534 | 2. 659361 | 26. 75391 | 2. 45E-83  | 4. 73E-82  | 178. 0774 |
| GTF2F2      | 1. 58318  | 3. 042431 | 31. 61019 | 4. 61E-100 | 1. 93E-98  | 216. 6632 |
| TPT1        | 1. 157787 | 11. 85073 | 10. 64096 | 8. 13E-23  | 3. 44E-22  | 38. 77318 |
| RCN1P2      | 1. 061478 | 2. 285382 | 13. 34164 | 1. 54E-32  | 8. 00E-32  | 61. 07767 |
| ZC3H13      | 1. 267833 | 2. 802153 | 22. 83934 | 5. 72E-69  | 6. 88E-68  | 144. 9479 |
| LCP1        | 3. 341937 | 3. 304356 | 31. 29964 | 4. 95E-99  | 1. 96E-97  | 214. 2837 |
| KIAA0226L   | 1. 18546  | 1. 095139 | 17. 59284 | 7. 82E-49  | 5. 66E-48  | 98. 55495 |
| LRCH1       | 2. 156016 | 2. 361933 | 37. 10334 | 1. 89E-117 | 2. 26E-115 | 256. 7832 |
| ESD         | 1. 807561 | 5. 429988 | 28. 23857 | 1. 39E-88  | 3. 27E-87  | 190. 1833 |
| SUCLA2      | 1. 41768  | 3. 50648  | 24. 80525 | 2. 82E-76  | 4. 29E-75  | 161. 7934 |
| NUDT15      | 1. 446477 | 2. 815513 | 27. 82545 | 3. 89E-87  | 8. 63E-86  | 186. 8417 |
| MED4        | 1. 504095 | 4. 428929 | 26. 68019 | 4. 50E-83  | 8. 59E-82  | 177. 4694 |
| ITM2B       | 2. 60266  | 8. 356935 | 31. 36478 | 3. 01E-99  | 1. 20E-97  | 214. 7838 |
| RB1         | 1. 799486 | 3. 011345 | 17. 01666 | 1. 34E-46  | 9. 30E-46  | 93. 40934 |
| LPAR6       | 2. 289814 | 3. 230161 | 29. 73845 | 9. 10E-94  | 2. 77E-92  | 202. 1384 |
| RCBTB2      | 1. 195797 | 2. 367784 | 19. 92133 | 7. 54E-58  | 6. 71E-57  | 119. 3194 |
| P11-156K23. | 1. 200692 | 1. 053863 | 31. 52755 | 8. 66E-100 | 3. 56E-98  | 216. 0312 |
| COX7CP1     | -1. 0349  | 0. 998709 | -11. 483  | 9. 29E-26  | 4. 20E-25  | 45. 51464 |



|              |           |           |           |            |            |           |
|--------------|-----------|-----------|-----------|------------|------------|-----------|
| CDADC1       | 1. 280917 | 2. 122464 | 29. 8988  | 2. 58E-94  | 8. 09E-93  | 203. 3999 |
| KPNA3        | 1. 785831 | 2. 753908 | 33. 01898 | 1. 12E-104 | 6. 18E-103 | 227. 3062 |
| TRIM13       | 1. 170751 | 3. 258096 | 22. 7536  | 1. 20E-68  | 1. 43E-67  | 144. 2045 |
| DLEU1        | 1. 512584 | 2. 013717 | 30. 5609  | 1. 48E-96  | 5. 15E-95  | 208. 5748 |
| WDFY2        | -1. 19594 | 2. 56997  | -21. 8134 | 4. 31E-65  | 4. 65E-64  | 136. 0105 |
| ALG11        | 1. 132371 | 1. 765932 | 23. 91045 | 5. 69E-73  | 7. 71E-72  | 154. 1748 |
| UTP14C       | 1. 236492 | 2. 356409 | 24. 54711 | 2. 51E-75  | 3. 70E-74  | 159. 6043 |
| CKAP2        | 2. 026614 | 1. 689585 | 36. 22474 | 8. 93E-115 | 9. 16E-113 | 250. 6123 |
| SUGT1        | 1. 549032 | 4. 439756 | 24. 9011  | 1. 26E-76  | 1. 93E-75  | 162. 6044 |
| OLFM4        | 2. 71206  | 6. 644451 | 8. 952284 | 2. 99E-17  | 1. 12E-16  | 26. 04678 |
| DIAPH3       | 1. 178379 | 0. 68064  | 27. 98975 | 1. 03E-87  | 2. 34E-86  | 188. 1731 |
| MZT1         | 1. 656074 | 2. 419431 | 31. 27473 | 5. 99E-99  | 2. 36E-97  | 214. 0923 |
| BORA         | 1. 237479 | 1. 367172 | 29. 6788  | 1. 46E-93  | 4. 39E-92  | 201. 6683 |
| DIS3         | 1. 306903 | 2. 734928 | 23. 72734 | 2. 73E-72  | 3. 62E-71  | 152. 6055 |
| PIBF1        | 1. 527713 | 2. 759311 | 14. 32724 | 2. 98E-36  | 1. 67E-35  | 69. 6077  |
| KLF5         | 3. 926257 | 4. 018138 | 42. 16408 | 4. 18E-132 | 1. 44E-129 | 290. 6079 |
| KLF12        | 1. 128194 | 0. 990747 | 21. 32827 | 3. 03E-63  | 3. 10E-62  | 131. 7544 |
| COMMD6       | 2. 010586 | 6. 697763 | 27. 40024 | 1. 23E-85  | 2. 58E-84  | 183. 3803 |
| UCHL3        | 1. 421936 | 4. 370845 | 23. 27095 | 1. 38E-70  | 1. 74E-69  | 148. 6794 |
| LM07         | 2. 814905 | 5. 138296 | 31. 77071 | 1. 36E-100 | 5. 85E-99  | 217. 8884 |
| KCTD12       | 2. 475703 | 3. 028562 | 28. 84604 | 1. 07E-90  | 2. 81E-89  | 195. 0589 |
| CLN5         | 1. 263457 | 3. 586405 | 22. 28609 | 6. 97E-67  | 7. 87E-66  | 140. 1397 |
| FBXL3        | 1. 31828  | 3. 378695 | 22. 48863 | 1. 20E-67  | 1. 39E-66  | 141. 9031 |
| SCEL         | 2. 863539 | 1. 498614 | 25. 10269 | 2. 30E-77  | 3. 61E-76  | 164. 3068 |
| RNF219       | 1. 352709 | 1. 80121  | 32. 55497 | 3. 62E-103 | 1. 81E-101 | 223. 8281 |
| NDFIP2       | 1. 395427 | 3. 71386  | 20. 42955 | 8. 36E-60  | 7. 81E-59  | 123. 8251 |
| SPRY2        | 1. 193065 | 3. 744084 | 16. 77406 | 1. 17E-45  | 7. 94E-45  | 91. 24474 |
| PTMAP5       | 1. 85442  | 2. 014276 | 24. 4782  | 4. 51E-75  | 6. 58E-74  | 159. 0187 |
| GPC6         | 2. 083182 | 1. 289191 | 28. 17439 | 2. 32E-88  | 5. 44E-87  | 189. 6656 |
| SOX21        | 1. 331129 | 0. 653519 | 16. 9023  | 3. 73E-46  | 2. 55E-45  | 92. 38874 |
| ABCC4        | 1. 121582 | 1. 377916 | 20. 99946 | 5. 46E-62  | 5. 41E-61  | 128. 8596 |
| MBNL2        | 1. 045569 | 4. 11419  | 13. 55405 | 2. 47E-33  | 1. 30E-32  | 62. 90285 |
| RAP2A        | 1. 733912 | 2. 03227  | 33. 06567 | 7. 94E-105 | 4. 39E-103 | 227. 6547 |
| STK24        | 2. 211563 | 5. 289379 | 32. 6333  | 2. 01E-103 | 1. 02E-101 | 224. 4171 |
| DOCK9        | 1. 919654 | 3. 935555 | 24. 24622 | 3. 24E-74  | 4. 59E-73  | 157. 0436 |
| UBAC2        | 2. 053427 | 4. 87816  | 32. 93934 | 2. 04E-104 | 1. 09E-102 | 226. 7112 |
| GPR183       | 2. 751376 | 2. 06038  | 27. 7429  | 7. 60E-87  | 1. 67E-85  | 186. 1714 |
| LINC01232    | 1. 727713 | 1. 11094  | 30. 86436 | 1. 41E-97  | 5. 19E-96  | 210. 9282 |
| TM9SF2       | 1. 427112 | 5. 623891 | 21. 00632 | 5. 14E-62  | 5. 09E-61  | 128. 9202 |
| ITGBL1       | 3. 964771 | 3. 213377 | 33. 80236 | 3. 41E-107 | 2. 16E-105 | 233. 1176 |
| TPP2         | 1. 036367 | 3. 741167 | 18. 23913 | 2. 43E-51  | 1. 85E-50  | 104. 329  |
| TEX30        | 1. 098471 | 2. 177641 | 23. 67239 | 4. 37E-72  | 5. 75E-71  | 152. 1338 |
| KDELC1       | 1. 940104 | 1. 775342 | 32. 15325 | 7. 46E-102 | 3. 44E-100 | 220. 7952 |
| ERCC5        | 1. 246675 | 4. 760248 | 19. 60891 | 1. 21E-56  | 1. 05E-55  | 116. 543  |
| LINC00460    | 1. 740754 | 0. 840061 | 18. 60027 | 9. 66E-53  | 7. 62E-52  | 107. 5539 |
| EFNB2        | 3. 368682 | 2. 881952 | 46. 30442 | 3. 25E-143 | 2. 77E-140 | 316. 2494 |
| AL442127. 1  | -1. 75306 | 1. 691046 | -9. 09427 | 1. 07E-17  | 4. 03E-17  | 27. 06953 |
| LINC00443    | 1. 146807 | 0. 551967 | 12. 04899 | 8. 71E-28  | 4. 11E-27  | 50. 16563 |
| ABHD13       | 1. 26522  | 1. 874392 | 30. 69645 | 5. 16E-97  | 1. 85E-95  | 209. 6274 |
| TNFSF13B     | 1. 911233 | 1. 712076 | 28. 29724 | 8. 64E-89  | 2. 07E-87  | 190. 6562 |
| RP11-54H7. 4 | 1. 135761 | 0. 564601 | 10. 80351 | 2. 24E-23  | 9. 59E-23  | 40. 05659 |
| IRS2         | 1. 301828 | 1. 99265  | 20. 26155 | 3. 70E-59  | 3. 39E-58  | 122. 3372 |
| COL4A1       | 3. 475239 | 5. 072847 | 31. 59965 | 4. 99E-100 | 2. 09E-98  | 216. 5826 |
| COL4A2       | 3. 473675 | 5. 44178  | 33. 58584 | 1. 68E-106 | 1. 02E-104 | 231. 519  |

|               |           |           |           |            |            |           |
|---------------|-----------|-----------|-----------|------------|------------|-----------|
| RAB20         | 1. 993456 | 4. 211814 | 30. 78081 | 2. 69E-97  | 9. 77E-96  | 210. 2813 |
| CARS2         | 1. 035356 | 4. 690575 | 16. 31176 | 7. 22E-44  | 4. 71E-43  | 87. 12564 |
| ING1          | 1. 424617 | 2. 741867 | 28. 06555 | 5. 59E-88  | 1. 28E-86  | 188. 7863 |
| ATP11A        | 1. 11776  | 3. 313799 | 14. 58728 | 3. 06E-37  | 1. 75E-36  | 71. 88131 |
| F10           | 1. 449614 | 2. 128655 | 14. 61026 | 2. 50E-37  | 1. 43E-36  | 72. 08266 |
| CUL4A         | 1. 141629 | 4. 356448 | 19. 01747 | 2. 34E-54  | 1. 92E-53  | 111. 276  |
| LAMP1         | 1. 906418 | 6. 343824 | 28. 78341 | 1. 76E-90  | 4. 58E-89  | 194. 5583 |
| GRTP1         | 1. 559299 | 3. 040854 | 21. 8678  | 2. 68E-65  | 2. 91E-64  | 136. 4868 |
| TMCO3         | 1. 066624 | 4. 74188  | 15. 17658 | 1. 71E-39  | 1. 02E-38  | 77. 06225 |
| TFDP1         | 1. 996344 | 4. 090928 | 38. 19546 | 1. 02E-120 | 1. 50E-118 | 264. 3276 |
| GAS6          | 1. 553609 | 5. 803836 | 18. 06467 | 1. 15E-50  | 8. 67E-50  | 102. 7705 |
| RASA3         | 1. 843635 | 3. 171279 | 28. 99146 | 3. 35E-91  | 9. 06E-90  | 196. 2193 |
| LINC01296     | 1. 048913 | 1. 895679 | 11. 76562 | 9. 12E-27  | 4. 20E-26  | 47. 82619 |
| TTC5          | 1. 136523 | 2. 164805 | 22. 64048 | 3. 20E-68  | 3. 77E-67  | 143. 2228 |
| TEP1          | 1. 77587  | 3. 398004 | 26. 50685 | 1. 88E-82  | 3. 51E-81  | 176. 0371 |
| APEX1         | 1. 333731 | 5. 991235 | 18. 16123 | 4. 87E-51  | 3. 69E-50  | 103. 6332 |
| TMEM55B       | 1. 012868 | 4. 228575 | 17. 79884 | 1. 24E-49  | 9. 14E-49  | 100. 3955 |
| PNP           | 2. 940413 | 4. 542066 | 36. 90522 | 7. 53E-117 | 8. 71E-115 | 255. 3997 |
| RNASE4        | 1. 108067 | 4. 565325 | 14. 3233  | 3. 09E-36  | 1. 72E-35  | 69. 57328 |
| ANG           | 1. 61037  | 4. 31395  | 18. 47194 | 3. 04E-52  | 2. 37E-51  | 106. 4082 |
| P11-903H12.   | 2. 065413 | 3. 590816 | 21. 23071 | 7. 14E-63  | 7. 25E-62  | 130. 8963 |
| RNASE6        | 2. 770522 | 2. 813226 | 26. 38435 | 5. 18E-82  | 9. 52E-81  | 175. 0229 |
| RNASE2        | 1. 238553 | 1. 233223 | 15. 12987 | 2. 58E-39  | 1. 54E-38  | 76. 65027 |
| HNRNPC        | 1. 848026 | 7. 426022 | 23. 51638 | 1. 67E-71  | 2. 15E-70  | 150. 7932 |
| SUPT16H       | 1. 533821 | 4. 4245   | 26. 68079 | 4. 48E-83  | 8. 55E-82  | 177. 4743 |
| CHD8          | 1. 593526 | 3. 884248 | 29. 92266 | 2. 14E-94  | 6. 74E-93  | 203. 5873 |
| TOX4          | 1. 082996 | 4. 11909  | 16. 59775 | 5. 64E-45  | 3. 77E-44  | 89. 67286 |
| TRAC          | 3. 577791 | 2. 721054 | 33. 11972 | 5. 31E-105 | 2. 96E-103 | 228. 0578 |
| TRDC          | 1. 061987 | 0. 645347 | 19. 79539 | 2. 31E-57  | 2. 03E-56  | 118. 2007 |
| DAD1          | 1. 828863 | 7. 033013 | 25. 61982 | 2. 99E-79  | 5. 01E-78  | 168. 6531 |
| ABHD4         | 1. 687012 | 3. 68064  | 27. 07478 | 1. 76E-84  | 3. 53E-83  | 180. 7163 |
| SLC7A7        | 3. 119386 | 3. 311531 | 37. 29696 | 4. 93E-118 | 6. 12E-116 | 258. 1309 |
| MRPL52        | 1. 694277 | 6. 207132 | 23. 38166 | 5. 31E-71  | 6. 77E-70  | 149. 6336 |
| MMP14         | 3. 923074 | 5. 768831 | 38. 29328 | 5. 23E-121 | 7. 81E-119 | 264. 9966 |
| LRP10         | 1. 782358 | 5. 60954  | 20. 00475 | 3. 60E-58  | 3. 23E-57  | 120. 0599 |
| PRMT5         | 1. 335662 | 4. 667265 | 21. 21654 | 8. 08E-63  | 8. 20E-62  | 130. 7716 |
| RP11-298I3. 5 | 1. 200942 | 2. 56587  | 14. 67972 | 1. 36E-37  | 7. 83E-37  | 72. 69153 |
| AJUBA         | 1. 23087  | 2. 414581 | 17. 53973 | 1. 26E-48  | 9. 04E-48  | 98. 0805  |
| PSMB5         | 1. 839748 | 5. 759421 | 28. 47994 | 1. 99E-89  | 4. 91E-88  | 192. 126  |
| C14orf119     | 2. 031615 | 4. 626476 | 33. 68889 | 7. 85E-107 | 4. 89E-105 | 232. 2806 |
| HOMEZ         | 1. 221222 | 2. 676039 | 23. 42416 | 3. 68E-71  | 4. 72E-70  | 149. 9996 |
| EFS           | 1. 451186 | 1. 572555 | 22. 20406 | 1. 42E-66  | 1. 60E-65  | 139. 4245 |
| MYH7          | -1. 14891 | 0. 681375 | -34. 6343 | 7. 83E-110 | 5. 83E-108 | 239. 2064 |
| NGDN          | 1. 130436 | 4. 353461 | 20. 65149 | 1. 18E-60  | 1. 13E-59  | 125. 7882 |
| FITM1         | -1. 68503 | 1. 663661 | -25. 5208 | 6. 85E-79  | 1. 13E-77  | 167. 8236 |
| PSME1         | 2. 337281 | 6. 779099 | 30. 11147 | 4. 89E-95  | 1. 59E-93  | 205. 0681 |
| PSME2         | 2. 239234 | 6. 71697  | 28. 02549 | 7. 72E-88  | 1. 76E-86  | 188. 4623 |
| IRF9          | 1. 978622 | 5. 40082  | 22. 10146 | 3. 48E-66  | 3. 86E-65  | 138. 5291 |
| REC8          | 1. 149152 | 2. 980596 | 12. 03797 | 9. 55E-28  | 4. 50E-27  | 50. 07431 |
| RP11-468E2. 1 | 2. 909388 | 2. 062953 | 27. 31157 | 2. 54E-85  | 5. 25E-84  | 182. 6558 |
| CHMP4A        | 1. 533941 | 5. 457178 | 21. 37889 | 1. 94E-63  | 2. 00E-62  | 132. 1993 |
| MDP1          | 1. 242231 | 3. 769987 | 22. 20551 | 1. 41E-66  | 1. 58E-65  | 139. 4372 |
| NEDD8         | 2. 126076 | 6. 517541 | 31. 21129 | 9. 75E-99  | 3. 81E-97  | 213. 6046 |
| GMPR2         | 1. 163236 | 4. 926763 | 18. 91083 | 6. 05E-54  | 4. 91E-53  | 110. 325  |

|              |          |          |          |           |           |          |
|--------------|----------|----------|----------|-----------|-----------|----------|
| TINF2        | 1.132374 | 4.590296 | 19.02024 | 2.28E-54  | 1.87E-53  | 111.3007 |
| DHRS1        | 1.544584 | 4.113851 | 22.53362 | 8.10E-68  | 9.42E-67  | 142.2943 |
| RIPK3        | 1.523311 | 3.30834  | 20.30508 | 2.51E-59  | 2.32E-58  | 122.7229 |
| NFATC4       | 1.534881 | 4.16242  | 16.40616 | 3.11E-44  | 2.05E-43  | 87.96608 |
| NYNRIN       | 1.707943 | 2.129351 | 23.95603 | 3.85E-73  | 5.25E-72  | 154.565  |
| CBLN3        | 1.1851   | 1.33869  | 19.77803 | 2.69E-57  | 2.37E-56  | 118.0465 |
| GZMH         | 1.685517 | 1.050587 | 22.29967 | 6.19E-67  | 7.01E-66  | 140.258  |
| GZMB         | 1.770821 | 1.308674 | 13.79245 | 3.14E-34  | 1.69E-33  | 64.9605  |
| COCH         | -1.98778 | 2.402036 | -15.6726 | 2.12E-41  | 1.31E-40  | 81.44802 |
| STRN3        | 1.36191  | 2.932686 | 20.27651 | 3.24E-59  | 2.98E-58  | 122.4698 |
| AP4S1        | 1.002458 | 1.835873 | 20.99706 | 5.58E-62  | 5.52E-61  | 128.8384 |
| HECTD1       | 1.016585 | 4.883849 | 15.02241 | 6.66E-39  | 3.93E-38  | 75.70336 |
| HEATR5A      | 1.265688 | 2.289236 | 25.7842  | 7.58E-80  | 1.30E-78  | 170.0284 |
| ARHGAP5-AS1  | 1.328167 | 1.498666 | 24.14897 | 7.43E-74  | 1.04E-72  | 156.2138 |
| ARHGAP5      | 1.748996 | 3.417733 | 23.37902 | 5.43E-71  | 6.92E-70  | 149.6109 |
| EGLN3        | 3.567411 | 3.185545 | 28.10453 | 4.08E-88  | 9.43E-87  | 189.1014 |
| SPTSSA       | 2.012752 | 3.420191 | 30.42662 | 4.19E-96  | 1.44E-94  | 207.5297 |
| EAPP         | 1.555028 | 4.129581 | 26.93203 | 5.68E-84  | 1.12E-82  | 179.5438 |
| P11-671J11.  | 2.42532  | 3.672688 | 39.28977 | 6.20E-124 | 1.09E-121 | 271.7493 |
| SNX6         | 2.189748 | 4.071699 | 30.77004 | 2.92E-97  | 1.06E-95  | 210.1979 |
| BAZ1A        | 1.673402 | 3.227329 | 25.54137 | 5.77E-79  | 9.56E-78  | 167.9957 |
| FAM177A1     | 1.55331  | 5.024937 | 21.44987 | 1.04E-63  | 1.08E-62  | 132.8229 |
| PPP2R3C      | 1.603105 | 3.44025  | 26.70762 | 3.59E-83  | 6.88E-82  | 177.6957 |
| KIAA0391     | 1.672831 | 3.075362 | 32.21768 | 4.58E-102 | 2.15E-100 | 221.283  |
| PSMA6        | 1.883578 | 6.01806  | 26.79618 | 1.73E-83  | 3.35E-82  | 178.4257 |
| NFKBIA       | 1.296059 | 6.124293 | 13.91837 | 1.05E-34  | 5.71E-34  | 66.05095 |
| MBIP         | 1.37604  | 3.328568 | 18.96888 | 3.61E-54  | 2.94E-53  | 110.8427 |
| FOXA1        | 1.933649 | 1.206492 | 24.03711 | 1.93E-73  | 2.66E-72  | 155.2583 |
| CLEC14A      | 1.641816 | 2.741558 | 22.84445 | 5.47E-69  | 6.59E-68  | 144.9921 |
| SEC23A       | 2.256961 | 3.13159  | 30.79603 | 2.39E-97  | 8.72E-96  | 210.3992 |
| GEMIN2       | 1.278037 | 2.560291 | 25.9013  | 2.86E-80  | 4.92E-79  | 171.0062 |
| TRAPPC6B     | 1.089193 | 2.98522  | 21.4211  | 1.34E-63  | 1.39E-62  | 132.5702 |
| CTAGE5       | 1.106738 | 4.444744 | 17.93388 | 3.71E-50  | 2.76E-49  | 101.6021 |
| FKBP3        | 1.669783 | 4.708495 | 28.24712 | 1.29E-88  | 3.06E-87  | 190.2523 |
| MIS18BP1     | 1.087828 | 2.666989 | 18.32937 | 1.09E-51  | 8.36E-51  | 105.135  |
| RPS29        | 1.14343  | 11.06907 | 10.67246 | 6.34E-23  | 2.69E-22  | 39.02117 |
| LRR1         | 1.470346 | 2.217392 | 29.96147 | 1.58E-94  | 5.02E-93  | 203.8921 |
| RP11-649E7.5 | 1.986153 | 1.348788 | 15.8764  | 3.47E-42  | 2.19E-41  | 83.25587 |
| POLE2        | 1.154218 | 1.344777 | 24.34844 | 1.36E-74  | 1.95E-73  | 157.9146 |
| Metazoa_SRP  | 1.185465 | 8.419045 | 10.30721 | 1.12E-21  | 4.61E-21  | 36.16753 |
| ARF6         | 2.737499 | 4.16206  | 43.04674 | 1.55E-134 | 6.64E-132 | 296.2208 |
| RP11-58E21.5 | 1.007416 | 0.570565 | 20.85595 | 1.93E-61  | 1.89E-60  | 127.5939 |
| SOS2         | 1.069499 | 2.693279 | 19.57124 | 1.69E-56  | 1.46E-55  | 116.2079 |
| CDKL1        | 1.218565 | 1.394328 | 19.37525 | 9.67E-56  | 8.17E-55  | 114.4637 |
| MAP4K5       | 1.010066 | 3.475632 | 14.51306 | 5.87E-37  | 3.33E-36  | 71.23149 |
| NIN          | 1.197465 | 2.158019 | 19.90652 | 8.60E-58  | 7.65E-57  | 119.1879 |
| PYGL         | 2.248672 | 3.02778  | 24.30634 | 1.94E-74  | 2.77E-73  | 157.556  |
| TMX1         | 1.33038  | 3.329301 | 19.262   | 2.65E-55  | 2.22E-54  | 113.4552 |
| FRMD6        | 2.594311 | 2.618195 | 30.70193 | 4.95E-97  | 1.77E-95  | 209.6699 |
| GNG2         | 2.012251 | 2.049141 | 23.30482 | 1.03E-70  | 1.30E-69  | 148.9714 |
| C14orf166    | 1.531171 | 6.644287 | 22.43039 | 1.99E-67  | 2.29E-66  | 141.3964 |
| NID2         | 1.549228 | 2.897163 | 17.44765 | 2.86E-48  | 2.04E-47  | 97.25793 |
| PTGER2       | 2.109938 | 1.392321 | 30.6991  | 5.06E-97  | 1.81E-95  | 209.648  |
| ERO1L        | 2.440375 | 4.221533 | 26.4961  | 2.06E-82  | 3.83E-81  | 175.9482 |

|             |           |           |           |            |            |           |
|-------------|-----------|-----------|-----------|------------|------------|-----------|
| P11-841020. | 1. 252687 | 0. 8725   | 10. 51128 | 2. 26E-22  | 9. 48E-22  | 37. 75595 |
| PSMC6       | 1. 261037 | 5. 178662 | 20. 06413 | 2. 13E-58  | 1. 92E-57  | 120. 5868 |
| FERMT2      | 1. 376627 | 3. 495831 | 16. 11074 | 4. 32E-43  | 2. 77E-42  | 85. 33756 |
| BMP4        | 3. 592964 | 2. 924508 | 35. 00706 | 5. 29E-111 | 4. 25E-109 | 241. 9071 |
| CDKN3       | 2. 946651 | 1. 945874 | 45. 18761 | 2. 73E-140 | 1. 79E-137 | 309. 502  |
| CNIH1       | 2. 162544 | 5. 199701 | 29. 18617 | 7. 13E-92  | 1. 99E-90  | 197. 7689 |
| GMFB        | 1. 757794 | 3. 172345 | 28. 97889 | 3. 70E-91  | 9. 98E-90  | 196. 1191 |
| CGRRF1      | 1. 06416  | 3. 082186 | 18. 43986 | 4. 05E-52  | 3. 15E-51  | 106. 1218 |
| SAMD4A      | 1. 191375 | 2. 168725 | 17. 23253 | 1. 95E-47  | 1. 37E-46  | 95. 33654 |
| GCH1        | 1. 380894 | 2. 326564 | 19. 5141  | 2. 81E-56  | 2. 41E-55  | 115. 6996 |
| WDHD1       | 1. 260747 | 1. 17463  | 11. 08168 | 2. 41E-24  | 1. 05E-23  | 42. 27341 |
| SOCS4       | 1. 203762 | 1. 87101  | 24. 97963 | 6. 48E-77  | 1. 00E-75  | 163. 2681 |
| MAPK1IP1L   | 1. 733766 | 4. 094396 | 26. 76739 | 2. 20E-83  | 4. 23E-82  | 178. 1885 |
| LGALS3      | 3. 970693 | 6. 88759  | 41. 93458 | 1. 82E-131 | 5. 85E-129 | 289. 135  |
| DLGAP5      | 2. 144733 | 1. 109492 | 37. 09753 | 1. 97E-117 | 2. 34E-115 | 256. 7427 |
| AL158801.1  | 1. 660847 | 0. 941531 | 30. 34984 | 7. 61E-96  | 2. 56E-94  | 206. 9311 |
| FBX034      | 2. 034907 | 2. 960052 | 30. 76847 | 2. 96E-97  | 1. 07E-95  | 210. 1858 |
| KTN1        | 1. 463275 | 5. 439748 | 22. 14115 | 2. 46E-66  | 2. 75E-65  | 138. 8756 |
| EXOC5       | 1. 612336 | 2. 841787 | 23. 87298 | 7. 84E-73  | 1. 06E-71  | 153. 8539 |
| AP5M1       | 1. 458302 | 2. 695918 | 25. 84078 | 4. 73E-80  | 8. 12E-79  | 170. 501  |
| NAA30       | 1. 06513  | 2. 314414 | 22. 2613  | 8. 65E-67  | 9. 76E-66  | 139. 9236 |
| C14orf105   | -1. 16475 | 4. 219021 | -9. 87805 | 3. 06E-20  | 1. 23E-19  | 32. 87857 |
| P11-999E24. | 1. 058578 | 0. 75314  | 23. 53768 | 1. 39E-71  | 1. 80E-70  | 150. 9764 |
| C14orf37    | 1. 19071  | 0. 901277 | 22. 00984 | 7. 74E-66  | 8. 51E-65  | 137. 7289 |
| ACTR10      | 1. 570932 | 5. 011544 | 23. 96448 | 3. 59E-73  | 4. 90E-72  | 154. 6372 |
| PSMA3       | 1. 534726 | 5. 760385 | 22. 96791 | 1. 88E-69  | 2. 29E-68  | 146. 0613 |
| KIAA0586    | 1. 066763 | 2. 08834  | 22. 06199 | 4. 91E-66  | 5. 43E-65  | 138. 1845 |
| DACT1       | 2. 453155 | 2. 010206 | 29. 27894 | 3. 42E-92  | 9. 66E-91  | 198. 5055 |
| DAAM1       | 1. 246098 | 2. 920578 | 16. 91429 | 3. 35E-46  | 2. 30E-45  | 92. 49572 |
| JKAMP       | 1. 457313 | 4. 092249 | 23. 13803 | 4. 33E-70  | 5. 38E-69  | 147. 5321 |
| RTN1        | 1. 30427  | 2. 020379 | 12. 85979 | 9. 47E-31  | 4. 74E-30  | 56. 96827 |
| PCNXL4      | 1. 112671 | 3. 365344 | 17. 25038 | 1. 67E-47  | 1. 17E-46  | 95. 49597 |
| DHRS7       | 1. 930711 | 5. 360133 | 27. 32494 | 2. 28E-85  | 4. 72E-84  | 182. 7651 |
| PPM1A       | 1. 152951 | 3. 97958  | 19. 87799 | 1. 11E-57  | 9. 83E-57  | 118. 9345 |
| SIX1        | 1. 059104 | 0. 549594 | 17. 21521 | 2. 28E-47  | 1. 60E-46  | 95. 18193 |
| MNAT1       | 1. 612717 | 3. 48384  | 28. 28453 | 9. 57E-89  | 2. 28E-87  | 190. 5538 |
| SLC38A6     | 1. 592099 | 2. 385191 | 30. 25378 | 1. 61E-95  | 5. 34E-94  | 206. 1812 |
| PRKCH       | 1. 517525 | 2. 807014 | 22. 39635 | 2. 67E-67  | 3. 06E-66  | 141. 1001 |
| TMEM30B     | 1. 219498 | 3. 649107 | 16. 73865 | 1. 61E-45  | 1. 09E-44  | 90. 92903 |
| HIF1A       | 2. 626444 | 4. 625511 | 28. 53245 | 1. 31E-89  | 3. 25E-88  | 192. 5477 |
| SNAPC1      | 1. 587782 | 1. 719409 | 32. 84701 | 4. 06E-104 | 2. 14E-102 | 226. 0203 |
| RHOJ        | 1. 56153  | 1. 982637 | 21. 49043 | 7. 29E-64  | 7. 60E-63  | 133. 1791 |
| PPP2R5E     | 1. 694843 | 2. 648018 | 30. 92301 | 8. 97E-98  | 3. 34E-96  | 211. 3817 |
| WDR89       | 1. 075655 | 2. 176821 | 25. 33332 | 3. 30E-78  | 5. 35E-77  | 166. 2489 |
| MTHFD1      | 1. 308841 | 4. 333202 | 22. 43262 | 1. 95E-67  | 2. 24E-66  | 141. 4158 |
| ZBTB1       | 1. 018354 | 3. 403871 | 15. 37014 | 3. 09E-40  | 1. 87E-39  | 78. 77134 |
| HSPA2       | 1. 001813 | 2. 569329 | 11. 99532 | 1. 36E-27  | 6. 40E-27  | 49. 72096 |
| CHURC1      | 1. 698251 | 4. 412824 | 26. 30628 | 9. 89E-82  | 1. 79E-80  | 174. 3755 |
| GPX2        | 5. 412858 | 5. 408567 | 33. 13424 | 4. 77E-105 | 2. 67E-103 | 228. 166  |
| RAB15       | 1. 133816 | 3. 263091 | 13. 95663 | 7. 55E-35  | 4. 10E-34  | 66. 38275 |
| FNTB        | 1. 359145 | 2. 800863 | 26. 09707 | 5. 61E-81  | 9. 91E-80  | 172. 6373 |
| MAX         | 1. 816551 | 4. 490595 | 30. 88397 | 1. 21E-97  | 4. 47E-96  | 211. 0799 |
| FUT8        | 1. 748446 | 3. 527346 | 23. 58689 | 9. 10E-72  | 1. 18E-70  | 151. 3995 |
| LINC00238   | -1. 06262 | 0. 684028 | -18. 8237 | 1. 32E-53  | 1. 06E-52  | 109. 5482 |

|              |           |           |           |            |            |           |
|--------------|-----------|-----------|-----------|------------|------------|-----------|
| MPP5         | 1. 218601 | 2. 423782 | 24. 11646 | 9. 80E-74  | 1. 37E-72  | 155. 9363 |
| ATP6V1D      | 2. 370507 | 4. 947246 | 37. 10948 | 1. 81E-117 | 2. 17E-115 | 256. 826  |
| EIF2S1       | 1. 384215 | 5. 037845 | 17. 65692 | 4. 41E-49  | 3. 21E-48  | 99. 12746 |
| PLEK2        | 3. 844639 | 3. 716272 | 42. 75793 | 9. 58E-134 | 3. 79E-131 | 294. 3932 |
| PLEKHH1      | -1. 41905 | 3. 57522  | -16. 2066 | 1. 84E-43  | 1. 19E-42  | 86. 1897  |
| VTI1B        | 1. 495979 | 5. 659427 | 23. 95784 | 3. 79E-73  | 5. 18E-72  | 154. 5804 |
| RDH11        | 1. 722023 | 4. 428721 | 27. 45814 | 7. 69E-86  | 1. 62E-84  | 183. 853  |
| RAD51B       | 1. 396299 | 1. 740551 | 29. 11662 | 1. 24E-91  | 3. 42E-90  | 197. 2159 |
| ACTN1        | 2. 755337 | 5. 81787  | 30. 10406 | 5. 18E-95  | 1. 68E-93  | 205. 01   |
| ERH          | 2. 175393 | 5. 64256  | 33. 01035 | 1. 20E-104 | 6. 57E-103 | 227. 2417 |
| SLC39A9      | 1. 417483 | 3. 969849 | 28. 08524 | 4. 77E-88  | 1. 10E-86  | 188. 9455 |
| SUSD6        | 1. 650827 | 3. 966478 | 23. 02271 | 1. 17E-69  | 1. 44E-68  | 146. 5353 |
| COX16        | 1. 431335 | 4. 904434 | 25. 25515 | 6. 37E-78  | 1. 02E-76  | 165. 5913 |
| YNJ2BP-COX1  | 1. 540311 | 2. 138507 | 14. 68668 | 1. 28E-37  | 7. 37E-37  | 72. 75257 |
| SYNJ2BP      | 1. 41204  | 2. 653818 | 27. 48848 | 6. 01E-86  | 1. 27E-84  | 184. 1005 |
| MED6         | 1. 453865 | 3. 348323 | 28. 25726 | 1. 19E-88  | 2. 82E-87  | 190. 334  |
| TTC9         | 2. 294027 | 1. 72383  | 31. 12124 | 1. 95E-98  | 7. 49E-97  | 212. 9113 |
| RP6-65G23. 3 | 1. 404022 | 1. 120405 | 21. 01986 | 4. 56E-62  | 4. 53E-61  | 129. 0395 |
| PCNX         | 1. 07584  | 2. 629185 | 20. 40212 | 1. 07E-59  | 9. 92E-59  | 123. 5823 |
| SIPA1L1      | 1. 568736 | 4. 133998 | 23. 95734 | 3. 81E-73  | 5. 20E-72  | 154. 5761 |
| ZFYVE1       | 1. 29352  | 2. 626007 | 23. 71781 | 2. 96E-72  | 3. 92E-71  | 152. 5237 |
| PSEN1        | 2. 326092 | 3. 962481 | 37. 9447  | 5. 67E-120 | 7. 88E-118 | 262. 6076 |
| PAPLN        | 1. 52757  | 2. 315833 | 16. 63508 | 4. 05E-45  | 2. 71E-44  | 90. 00556 |
| NUMB         | 1. 21633  | 4. 535152 | 18. 90116 | 6. 60E-54  | 5. 35E-53  | 110. 2387 |
| C14orf169    | 1. 043091 | 2. 202981 | 24. 16308 | 6. 58E-74  | 9. 24E-73  | 156. 3343 |
| ACOT1        | 1. 308455 | 1. 667478 | 24. 24495 | 3. 28E-74  | 4. 64E-73  | 157. 0328 |
| ACOT2        | 1. 548283 | 3. 466369 | 26. 28352 | 1. 19E-81  | 2. 16E-80  | 174. 1867 |
| ACOT4        | 1. 045349 | 1. 127426 | 23. 10869 | 5. 58E-70  | 6. 91E-69  | 147. 2786 |
| DNAL1        | 1. 455843 | 1. 810689 | 29. 75327 | 8. 10E-94  | 2. 47E-92  | 202. 2552 |
| PNMA1        | 3. 08071  | 3. 262868 | 42. 5851  | 2. 86E-133 | 1. 09E-130 | 293. 2954 |
| ELMSAN1      | 1. 209682 | 2. 904908 | 17. 76455 | 1. 69E-49  | 1. 24E-48  | 100. 0892 |
| ZNF410       | 1. 467336 | 4. 009191 | 24. 18308 | 5. 55E-74  | 7. 82E-73  | 156. 505  |
| FAM161B      | 1. 256717 | 1. 201767 | 25. 39608 | 1. 95E-78  | 3. 18E-77  | 166. 7764 |
| COQ6         | 1. 078993 | 3. 389488 | 20. 55079 | 2. 86E-60  | 2. 71E-59  | 124. 8979 |
| ENTPD5       | 1. 453777 | 2. 247567 | 20. 68127 | 9. 04E-61  | 8. 68E-60  | 126. 0513 |
| LIN52        | 1. 003287 | 1. 659804 | 23. 7223  | 2. 85E-72  | 3. 78E-71  | 152. 5622 |
| NPC2         | 2. 664908 | 6. 784344 | 33. 11275 | 5. 59E-105 | 3. 12E-103 | 228. 0058 |
| ISCA2        | 1. 419088 | 3. 701504 | 26. 09173 | 5. 86E-81  | 1. 03E-79  | 172. 5929 |
| LTBP2        | 2. 915403 | 3. 276329 | 30. 7726  | 2. 86E-97  | 1. 04E-95  | 210. 2178 |
| FCF1         | 1. 645306 | 3. 433791 | 22. 55291 | 6. 85E-68  | 7. 98E-67  | 142. 462  |
| DLST         | 1. 198064 | 4. 911165 | 17. 99028 | 2. 24E-50  | 1. 68E-49  | 102. 106  |
| PGF          | 2. 240708 | 2. 580304 | 28. 03503 | 7. 15E-88  | 1. 64E-86  | 188. 5395 |
| EIF2B2       | 1. 604762 | 4. 400773 | 25. 56049 | 4. 92E-79  | 8. 18E-78  | 168. 156  |
| MLH3         | 1. 277587 | 3. 148467 | 21. 83883 | 3. 45E-65  | 3. 73E-64  | 136. 2333 |
| ACYP1        | 1. 559979 | 3. 178762 | 22. 92446 | 2. 74E-69  | 3. 32E-68  | 145. 6852 |
| TMED10       | 1. 087967 | 6. 929663 | 13. 70096 | 6. 94E-34  | 3. 70E-33  | 64. 16972 |
| FOS          | 1. 881654 | 6. 831601 | 10. 5927  | 1. 19E-22  | 5. 02E-22  | 38. 39397 |
| JDP2         | 1. 853685 | 3. 681095 | 25. 32914 | 3. 42E-78  | 5. 54E-77  | 166. 2138 |
| BATF         | 3. 900833 | 2. 389809 | 49. 88378 | 3. 07E-152 | 4. 88E-149 | 337. 0835 |
| FLVCR2       | 1. 636217 | 1. 189723 | 28. 08796 | 4. 66E-88  | 1. 07E-86  | 188. 9675 |
| TTLL5        | 1. 593536 | 2. 801859 | 31. 9577  | 3. 28E-101 | 1. 45E-99  | 219. 3116 |
| C14orf1      | 1. 834056 | 3. 583994 | 31. 75211 | 1. 56E-100 | 6. 72E-99  | 217. 7466 |
| IFT43        | 1. 376002 | 4. 232905 | 24. 16121 | 6. 69E-74  | 9. 39E-73  | 156. 3184 |
| VASH1        | 1. 703831 | 2. 317631 | 22. 80964 | 7. 39E-69  | 8. 86E-68  | 144. 6905 |

|              |          |          |          |           |           |          |
|--------------|----------|----------|----------|-----------|-----------|----------|
| ANGEL1       | -1.03031 | 3.647424 | -17.0844 | 7.34E-47  | 5.10E-46  | 94.01416 |
| CIPC         | 1.051097 | 2.457119 | 20.34118 | 1.83E-59  | 1.69E-58  | 123.0427 |
| GSTZ1        | 1.024483 | 3.661935 | 16.29126 | 8.66E-44  | 5.65E-43  | 86.94322 |
| TMED8        | 1.046612 | 1.842284 | 21.5438  | 4.57E-64  | 4.79E-63  | 133.6476 |
| VIPAS39      | 1.117074 | 3.079282 | 20.83004 | 2.43E-61  | 2.37E-60  | 127.3652 |
| AHSA1        | 1.915963 | 5.650669 | 27.81873 | 4.11E-87  | 9.10E-86  | 186.7871 |
| SPTLC2       | 2.378246 | 2.790474 | 42.54054 | 3.80E-133 | 1.40E-130 | 293.0119 |
| ALKBH1       | 1.187379 | 2.293925 | 26.96896 | 4.19E-84  | 8.30E-83  | 179.8474 |
| SLIRP        | 1.732712 | 6.138753 | 25.22866 | 7.96E-78  | 1.27E-76  | 165.3683 |
| SNW1         | 1.340166 | 4.61137  | 22.61257 | 4.08E-68  | 4.79E-67  | 142.9803 |
| DIO2         | 2.220767 | 1.417901 | 27.38479 | 1.40E-85  | 2.92E-84  | 183.2542 |
| GTF2A1       | 1.354462 | 2.336747 | 24.46677 | 4.97E-75  | 7.24E-74  | 158.9214 |
| STON2        | 1.599719 | 1.073929 | 29.74009 | 8.98E-94  | 2.74E-92  | 202.1513 |
| SEL1L        | -1.78287 | 5.36074  | -18.8227 | 1.33E-53  | 1.07E-52  | 109.5388 |
| FLRT2        | -1.55642 | 3.888291 | -14.3644 | 2.16E-36  | 1.21E-35  | 69.93177 |
| GALC         | 1.469646 | 3.230766 | 20.96804 | 7.20E-62  | 7.11E-61  | 128.5827 |
| TTC8         | 1.172978 | 3.044567 | 18.96684 | 3.67E-54  | 2.99E-53  | 110.8245 |
| FOXN3        | 1.02747  | 2.928713 | 14.87417 | 2.46E-38  | 1.44E-37  | 74.399   |
| P11-681H18.  | 1.044854 | 3.070131 | 15.68782 | 1.85E-41  | 1.15E-40  | 81.58318 |
| EFCAB11      | 1.936645 | 1.967026 | 37.38595 | 2.66E-118 | 3.35E-116 | 258.7488 |
| TDP1         | 1.205035 | 2.175962 | 25.49127 | 8.78E-79  | 1.45E-77  | 167.5755 |
| PSMC1        | 1.701044 | 5.651953 | 25.35747 | 2.70E-78  | 4.38E-77  | 166.4519 |
| NRDE2        | 1.021753 | 2.253974 | 24.26141 | 2.85E-74  | 4.04E-73  | 157.1731 |
| CALM1        | 1.646254 | 6.833444 | 21.45287 | 1.01E-63  | 1.05E-62  | 132.8493 |
| C14orf159    | 1.018568 | 4.05215  | 15.40984 | 2.17E-40  | 1.32E-39  | 79.12231 |
| GPR68        | 2.336647 | 1.48557  | 34.31052 | 8.24E-109 | 5.81E-107 | 236.8468 |
| CATSPERB     | -1.03572 | 2.093815 | -9.38797 | 1.23E-18  | 4.74E-18  | 29.21474 |
| RP11-747H7.5 | -1.41715 | 1.775727 | -21.3093 | 3.58E-63  | 3.66E-62  | 131.588  |
| ATXN3        | 1.270143 | 2.964049 | 20.89735 | 1.34E-61  | 1.32E-60  | 127.9592 |
| NDUFB1       | 1.616054 | 6.965939 | 22.17563 | 1.82E-66  | 2.04E-65  | 139.1765 |
| CPSF2        | 1.580744 | 3.032832 | 23.86074 | 8.70E-73  | 1.17E-71  | 153.7491 |
| RIN3         | 2.446958 | 2.362698 | 38.85299 | 1.17E-122 | 1.97E-120 | 268.8033 |
| LGMN         | 2.938366 | 5.314028 | 39.65514 | 5.39E-125 | 1.03E-122 | 274.197  |
| GOLGA5       | 1.608085 | 4.231891 | 29.87612 | 3.09E-94  | 9.66E-93  | 203.2217 |
| ITPK1        | 1.970727 | 4.519378 | 30.7767  | 2.78E-97  | 1.01E-95  | 210.2495 |
| MOAP1        | 1.06486  | 3.503969 | 18.9239  | 5.39E-54  | 4.38E-53  | 110.4416 |
| TMEM251      | 1.048431 | 3.7723   | 13.39305 | 9.89E-33  | 5.16E-32  | 61.51864 |
| C14orf142    | 1.211908 | 2.847299 | 24.59304 | 1.70E-75  | 2.52E-74  | 159.9943 |
| ASB2         | 1.045433 | 0.782485 | 14.70872 | 1.05E-37  | 6.08E-37  | 72.94592 |
| DDX24        | 1.733682 | 5.641734 | 25.97315 | 1.57E-80  | 2.73E-79  | 171.6054 |
| IFI27L1      | 1.648962 | 3.234474 | 16.06615 | 6.42E-43  | 4.11E-42  | 84.94118 |
| IFI27        | 6.142648 | 6.740608 | 48.20821 | 4.45E-148 | 5.28E-145 | 327.477  |
| IFI27L2      | 3.434236 | 4.934533 | 40.4923  | 2.12E-127 | 4.80E-125 | 279.7493 |
| SERPINA1     | 3.958549 | 7.467855 | 23.79277 | 1.56E-72  | 2.09E-71  | 153.1666 |
| SERPINA3     | -1.46318 | 7.571205 | -6.75872 | 6.68E-11  | 2.10E-10  | 11.61133 |
| GLRX5        | 1.513591 | 4.380744 | 27.29879 | 2.82E-85  | 5.81E-84  | 182.5513 |
| TCL1A        | 1.234644 | 0.635022 | 9.015971 | 1.89E-17  | 7.09E-17  | 26.50436 |
| C14orf132    | 1.058473 | 1.376843 | 16.25443 | 1.20E-43  | 7.81E-43  | 86.61546 |
| BDKRB2       | 1.567135 | 2.31827  | 23.52326 | 1.57E-71  | 2.03E-70  | 150.8524 |
| GSKIP        | 2.249971 | 3.218245 | 35.05106 | 3.85E-111 | 3.12E-109 | 242.2248 |
| AK7          | 1.06676  | 1.172445 | 20.20143 | 6.30E-59  | 5.75E-58  | 121.8044 |
| VRK1         | 1.709374 | 2.364876 | 15.12045 | 2.81E-39  | 1.67E-38  | 76.56728 |
| BCL11B       | 1.148788 | 0.624713 | 26.69052 | 4.14E-83  | 7.90E-82  | 177.5546 |
| SETD3        | 1.452773 | 4.17076  | 26.68758 | 4.24E-83  | 8.09E-82  | 177.5304 |

|              |          |          |          |           |           |          |
|--------------|----------|----------|----------|-----------|-----------|----------|
| CCNK         | 1.432814 | 3.64743  | 25.01669 | 4.74E-77  | 7.35E-76  | 163.5811 |
| HHIPL1       | 1.040221 | 0.626775 | 25.55895 | 4.98E-79  | 8.28E-78  | 168.1431 |
| DEGS2        | 1.988884 | 2.679374 | 18.26463 | 1.93E-51  | 1.48E-50  | 104.5569 |
| YY1          | 1.597645 | 4.243762 | 24.21986 | 4.06E-74  | 5.74E-73  | 156.8187 |
| RP11-638I2.6 | 2.718393 | 2.413352 | 25.17564 | 1.24E-77  | 1.97E-76  | 164.9217 |
| WARS         | 1.828545 | 5.339353 | 21.87961 | 2.42E-65  | 2.62E-64  | 136.5902 |
| BEGAIN       | -2.34612 | 2.46987  | -33.6361 | 1.16E-106 | 7.09E-105 | 231.8909 |
| MEG3         | -2.55876 | 6.185008 | -17.7394 | 2.11E-49  | 1.55E-48  | 99.86449 |
| MEG9         | -1.57205 | 1.429017 | -14.2164 | 7.86E-36  | 4.35E-35  | 68.64126 |
| DIO3         | 1.339093 | 1.305925 | 17.40645 | 4.13E-48  | 2.94E-47  | 96.88993 |
| PPP2R5C      | 1.745483 | 5.152833 | 29.40902 | 1.22E-92  | 3.52E-91  | 199.5366 |
| DYNC1H1      | 2.098066 | 6.152078 | 30.51956 | 2.04E-96  | 7.05E-95  | 208.2532 |
| HSP90AA1     | 1.814542 | 7.429672 | 18.20784 | 3.21E-51  | 2.44E-50  | 104.0496 |
| WDR20        | 1.02367  | 2.942556 | 20.97031 | 7.06E-62  | 6.97E-61  | 128.6027 |
| MOK          | 1.270171 | 3.580272 | 12.87326 | 8.45E-31  | 4.23E-30  | 57.08249 |
| RCOR1        | 1.687286 | 2.650158 | 27.01999 | 2.76E-84  | 5.50E-83  | 180.2666 |
| TRAF3        | 1.753833 | 2.085525 | 34.20652 | 1.76E-108 | 1.21E-106 | 236.0862 |
| AMN          | 3.243518 | 2.201984 | 24.5075  | 3.52E-75  | 5.15E-74  | 159.2677 |
| CDC42BPB     | 1.411001 | 4.616095 | 18.87053 | 8.67E-54  | 7.01E-53  | 109.9656 |
| EXOC3L4      | 2.432641 | 2.057462 | 23.68998 | 3.76E-72  | 4.95E-71  | 152.2848 |
| TNFAIP2      | 3.030099 | 5.532047 | 25.06632 | 3.12E-77  | 4.88E-76  | 164      |
| CKB          | 1.488862 | 5.898609 | 15.10004 | 3.36E-39  | 1.99E-38  | 76.38735 |
| TRMT61A      | 1.050864 | 2.817933 | 17.73664 | 2.16E-49  | 1.59E-48  | 99.83976 |
| BAG5         | 1.818163 | 2.828424 | 36.81096 | 1.45E-116 | 1.66E-114 | 254.7398 |
| KLC1         | 1.104348 | 5.341106 | 15.2811  | 6.79E-40  | 4.09E-39  | 77.9847  |
| RP11-73M18.2 | 1.312297 | 0.972045 | 15.31593 | 4.99E-40  | 3.01E-39  | 78.2924  |
| ZFYVE21      | 1.716061 | 4.567981 | 26.84643 | 1.15E-83  | 2.23E-82  | 178.8396 |
| C14orf2      | 1.414442 | 6.298377 | 21.40238 | 1.58E-63  | 1.63E-62  | 132.4058 |
| INF2         | 2.701566 | 5.05432  | 29.55014 | 4.01E-93  | 1.18E-91  | 200.6528 |
| P11-982M15.  | 1.541401 | 4.266964 | 20.45711 | 6.55E-60  | 6.13E-59  | 124.0691 |
| AKT1         | 1.220034 | 5.660576 | 17.92794 | 3.91E-50  | 2.91E-49  | 101.549  |
| PLD4         | 1.898466 | 1.287385 | 24.65102 | 1.04E-75  | 1.55E-74  | 160.4864 |
| AHNAK2       | 4.746462 | 2.949588 | 43.99663 | 4.09E-137 | 2.01E-134 | 302.1709 |
| CDCA4        | 1.999345 | 2.077808 | 38.46679 | 1.60E-121 | 2.50E-119 | 266.1805 |
| GPR132       | 2.180892 | 1.307971 | 37.1318  | 1.55E-117 | 1.87E-115 | 256.9816 |
| BTBD6        | 1.766233 | 3.388967 | 20.5956  | 1.93E-60  | 1.83E-59  | 125.2941 |
| P11-521B24.  | 1.244743 | 2.354057 | 11.24227 | 6.59E-25  | 2.91E-24  | 43.56462 |
| CRIP2        | 2.887351 | 5.979496 | 28.01041 | 8.72E-88  | 1.99E-86  | 188.3403 |
| CRIP1        | 6.297552 | 5.760414 | 56.91348 | 1.38E-168 | 8.37E-165 | 374.8147 |
| C14orf80     | 2.019899 | 2.476984 | 28.36582 | 4.98E-89  | 1.20E-87  | 191.2084 |
| IGHA2        | 4.61892  | 4.7533   | 21.64919 | 1.81E-64  | 1.92E-63  | 134.572  |
| IGHG4        | 6.265085 | 3.548878 | 27.18212 | 7.32E-85  | 1.48E-83  | 181.5963 |
| IGHG2        | 5.958866 | 4.32478  | 29.06064 | 1.93E-91  | 5.28E-90  | 196.7704 |
| IGHGP        | 4.126647 | 2.029032 | 27.10261 | 1.40E-84  | 2.82E-83  | 180.9446 |
| IGHG1        | 7.043032 | 5.977917 | 32.13646 | 8.47E-102 | 3.90E-100 | 220.668  |
| AL928768.3   | 2.102393 | 1.225815 | 16.15922 | 2.81E-43  | 1.81E-42  | 85.76857 |
| IGHA1        | 5.383529 | 6.689539 | 24.91568 | 1.11E-76  | 1.71E-75  | 162.7276 |
| IGHG3        | 5.714625 | 3.523279 | 29.78914 | 6.11E-94  | 1.88E-92  | 202.5376 |
| IGHD         | 1.915016 | 1.196446 | 12.54901 | 1.32E-29  | 6.43E-29  | 54.34296 |
| IGHM         | 5.136459 | 4.363299 | 26.10481 | 5.26E-81  | 9.31E-80  | 172.7017 |
| KIAA0125     | 1.160781 | 0.630332 | 12.91802 | 5.77E-31  | 2.90E-30  | 57.4624  |
| IGHV6-1      | 2.367238 | 1.293758 | 17.8786  | 6.08E-50  | 4.51E-49  | 101.1081 |
| IGHV1-2      | 3.269516 | 1.991702 | 18.38363 | 6.68E-52  | 5.17E-51  | 105.6197 |
| IGHV1-3      | 2.280412 | 1.289082 | 12.48073 | 2.34E-29  | 1.14E-28  | 53.769   |

|               |           |           |           |           |           |           |
|---------------|-----------|-----------|-----------|-----------|-----------|-----------|
| IGHV4-4       | 2. 427406 | 1. 33219  | 14. 37108 | 2. 03E-36 | 1. 14E-35 | 69. 9904  |
| H17-262H11.   | 1. 037748 | 0. 640564 | 6. 606643 | 1. 66E-10 | 5. 16E-10 | 10. 71765 |
| IGHV2-5       | 3. 40066  | 2. 041249 | 20. 63614 | 1. 35E-60 | 1. 29E-59 | 125. 6525 |
| IGHV3-7       | 3. 65701  | 2. 403003 | 21. 29122 | 4. 19E-63 | 4. 28E-62 | 131. 4286 |
| CH17-224D4. 1 | 1. 317016 | 0. 679656 | 10. 80212 | 2. 26E-23 | 9. 69E-23 | 40. 04553 |
| CH17-224D4. 2 | 1. 637987 | 0. 85536  | 11. 1596  | 1. 29E-24 | 5. 65E-24 | 42. 89894 |
| IGHV3-11      | 3. 376103 | 1. 974221 | 20. 99284 | 5. 79E-62 | 5. 72E-61 | 128. 8013 |
| IGHV3-13      | 2. 017372 | 1. 070578 | 14. 93769 | 1. 41E-38 | 8. 25E-38 | 74. 95767 |
| IGHV3-15      | 3. 721618 | 2. 346154 | 22. 17475 | 1. 84E-66 | 2. 06E-65 | 139. 1688 |
| IGHV1-18      | 3. 92584  | 2. 245903 | 22. 67019 | 2. 48E-68 | 2. 92E-67 | 143. 4807 |
| IGHV3-20      | 1. 046567 | 0. 538198 | 10. 0266  | 9. 81E-21 | 3. 98E-20 | 34. 00885 |
| IGHV3-21      | 4. 174164 | 2. 421355 | 25. 18813 | 1. 12E-77 | 1. 78E-76 | 165. 027  |
| IGHV3-23      | 4. 676599 | 3. 22544  | 22. 37521 | 3. 21E-67 | 3. 67E-66 | 140. 916  |
| IGHV1-24      | 2. 95715  | 1. 570479 | 19. 41758 | 6. 63E-56 | 5. 64E-55 | 114. 8406 |
| IGHV2-26      | 2. 235566 | 1. 194646 | 14. 78717 | 5. 29E-38 | 3. 07E-37 | 73. 63457 |
| IGHV4-28      | 1. 026577 | 0. 595905 | 11. 85772 | 4. 26E-27 | 1. 98E-26 | 48. 58426 |
| IGHV3-30      | 4. 620093 | 3. 05913  | 24. 52598 | 3. 01E-75 | 4. 42E-74 | 159. 4247 |
| IGHV4-31      | 2. 602747 | 1. 342368 | 17. 84369 | 8. 31E-50 | 6. 14E-49 | 100. 7963 |
| IGHV3-33      | 4. 00046  | 2. 565443 | 22. 8808  | 3. 99E-69 | 4. 83E-68 | 145. 307  |
| IGHV4-34      | 3. 190256 | 1. 800726 | 20. 91724 | 1. 13E-61 | 1. 11E-60 | 128. 1346 |
| IGHV4-39      | 4. 034387 | 2. 465573 | 22. 83049 | 6. 17E-69 | 7. 42E-68 | 144. 8712 |
| IGHV3-43      | 2. 270013 | 1. 19861  | 16. 7309  | 1. 72E-45 | 1. 16E-44 | 90. 85984 |
| IGHV1-46      | 2. 46166  | 1. 356374 | 18. 31853 | 1. 20E-51 | 9. 20E-51 | 105. 0382 |
| IGHV3-48      | 1. 605171 | 0. 959602 | 12. 19236 | 2. 64E-28 | 1. 26E-27 | 51. 35722 |
| IGHV3-49      | 2. 739424 | 1. 587714 | 19. 02447 | 2. 20E-54 | 1. 80E-53 | 111. 3384 |
| IGHV5-51      | 4. 283282 | 2. 549135 | 25. 17334 | 1. 27E-77 | 2. 01E-76 | 164. 9023 |
| IGHV3-53      | 1. 944607 | 1. 03215  | 17. 38344 | 5. 08E-48 | 3. 61E-47 | 96. 68439 |
| IGHV1-58      | 1. 289566 | 0. 631876 | 12. 26314 | 1. 46E-28 | 6. 99E-28 | 51. 94731 |
| IGHV4-59      | 3. 927484 | 2. 381214 | 22. 85093 | 5. 17E-69 | 6. 23E-68 | 145. 0483 |
| IGHV4-61      | 3. 202121 | 1. 774091 | 20. 98079 | 6. 44E-62 | 6. 36E-61 | 128. 695  |
| IGHV3-64      | 1. 023333 | 0. 55574  | 8. 442288 | 1. 13E-15 | 4. 05E-15 | 22. 45423 |
| IGHV3-66      | 1. 708429 | 0. 931337 | 14. 45434 | 9. 82E-37 | 5. 54E-36 | 70. 7179  |
| IGHV1-69      | 2. 520663 | 1. 322906 | 14. 90064 | 1. 95E-38 | 1. 14E-37 | 74. 63169 |
| IGHV1-69-2    | 4. 164474 | 2. 338499 | 24. 12063 | 9. 46E-74 | 1. 32E-72 | 155. 9719 |
| IGHV2-70      | 2. 17896  | 1. 22411  | 15. 24234 | 9. 56E-40 | 5. 73E-39 | 77. 64254 |
| IGHV3-72      | 2. 277193 | 1. 351227 | 16. 20453 | 1. 88E-43 | 1. 21E-42 | 86. 17151 |
| IGHV3-73      | 2. 208826 | 1. 258963 | 16. 60932 | 5. 09E-45 | 3. 41E-44 | 89. 77598 |
| IGHV3-74      | 2. 929629 | 1. 84094  | 20. 59546 | 1. 93E-60 | 1. 84E-59 | 125. 2929 |
| HERC2P2       | -1. 03161 | 3. 956073 | -9. 98487 | 1. 35E-20 | 5. 46E-20 | 33. 69045 |
| NIPA1         | 1. 123323 | 2. 232587 | 20. 36314 | 1. 50E-59 | 1. 40E-58 | 123. 2372 |
| NIPA2         | 1. 7276   | 3. 901983 | 29. 32026 | 2. 46E-92 | 7. 00E-91 | 198. 8333 |
| CYFIP1        | 1. 463276 | 4. 863666 | 24. 18646 | 5. 39E-74 | 7. 60E-73 | 156. 5338 |
| NDN           | 1. 587826 | 3. 182655 | 20. 68373 | 8. 84E-61 | 8. 49E-60 | 126. 0731 |
| PWRN1         | -1. 15036 | 0. 784551 | -20. 148  | 1. 01E-58 | 9. 18E-58 | 121. 3311 |
| UBE3A         | 1. 13915  | 3. 589355 | 14. 03681 | 3. 76E-35 | 2. 05E-34 | 67. 07876 |
| ATP10A        | 1. 770763 | 1. 268008 | 13. 65451 | 1. 04E-33 | 5. 51E-33 | 63. 76876 |
| NDNL2         | 1. 611117 | 2. 868256 | 30. 69916 | 5. 06E-97 | 1. 81E-95 | 209. 6484 |
| TJP1          | 1. 06313  | 4. 197495 | 15. 01825 | 6. 91E-39 | 4. 08E-38 | 75. 66676 |
| HMGN2P5       | 1. 873338 | 5. 029468 | 23. 98789 | 2. 94E-73 | 4. 03E-72 | 154. 8375 |
| RP11-16E12. 2 | 1. 117987 | 0. 846873 | 18. 21878 | 2. 91E-51 | 2. 22E-50 | 104. 1473 |
| GOLGA8N       | -1. 58872 | 2. 878949 | -24. 4918 | 4. 02E-75 | 5. 88E-74 | 159. 1339 |
| ARHGAP11A     | 1. 139272 | 1. 468781 | 19. 20011 | 4. 60E-55 | 3. 83E-54 | 112. 9038 |
| GREM1         | 4. 022243 | 2. 764527 | 27. 24805 | 4. 27E-85 | 8. 74E-84 | 182. 1362 |
| FMN1          | 1. 84813  | 1. 443495 | 29. 50864 | 5. 56E-93 | 1. 63E-91 | 200. 3248 |



|               |           |           |           |            |            |           |
|---------------|-----------|-----------|-----------|------------|------------|-----------|
| EMC7          | 1. 546502 | 5. 24732  | 26. 00376 | 1. 22E-80  | 2. 13E-79  | 171. 8604 |
| KATNBL1       | 1. 092673 | 3. 418787 | 18. 15191 | 5. 29E-51  | 4. 01E-50  | 103. 5499 |
| EMC4          | 1. 626028 | 5. 624455 | 27. 26086 | 3. 84E-85  | 7. 87E-84  | 182. 241  |
| SLC12A6       | 1. 273103 | 2. 268748 | 21. 20379 | 9. 04E-63  | 9. 16E-62  | 130. 6594 |
| NOP10         | 2. 430929 | 6. 223419 | 34. 25226 | 1. 26E-108 | 8. 77E-107 | 236. 4209 |
| LPCAT4        | 2. 975758 | 5. 059275 | 28. 96568 | 4. 11E-91  | 1. 11E-89  | 196. 0138 |
| GOLGA8A       | -1. 60683 | 4. 437841 | -14. 3159 | 3. 30E-36  | 1. 84E-35  | 69. 50892 |
| GOLGA8B       | -3. 59515 | 5. 448544 | -32. 4402 | 8. 57E-103 | 4. 18E-101 | 222. 9638 |
| AQR           | 1. 195566 | 3. 230399 | 23. 00835 | 1. 33E-69  | 1. 62E-68  | 146. 4111 |
| P11-463I20.   | 1. 373157 | 2. 871183 | 22. 01694 | 7. 28E-66  | 8. 01E-65  | 137. 7909 |
| C15orf41      | 1. 231868 | 1. 64099  | 25. 87272 | 3. 63E-80  | 6. 24E-79  | 170. 7676 |
| MEIS2         | 1. 255072 | 3. 203697 | 15. 45386 | 1. 47E-40  | 8. 97E-40  | 79. 51167 |
| SPRED1        | 2. 123131 | 2. 229798 | 34. 76035 | 3. 14E-110 | 2. 38E-108 | 240. 1216 |
| FAM98B        | 1. 473357 | 2. 365815 | 29. 79803 | 5. 70E-94  | 1. 76E-92  | 202. 6075 |
| RASGRP1       | 1. 183454 | 1. 135155 | 18. 06846 | 1. 12E-50  | 8. 38E-50  | 102. 8045 |
| THBS1         | 2. 50153  | 5. 054336 | 16. 74934 | 1. 46E-45  | 9. 89E-45  | 91. 02435 |
| GPR176        | 1. 950488 | 1. 511005 | 28. 79443 | 1. 61E-90  | 4. 20E-89  | 194. 6464 |
| EIF2AK4       | 1. 53996  | 3. 389246 | 28. 38518 | 4. 26E-89  | 1. 03E-87  | 191. 3642 |
| SRP14         | 2. 07824  | 7. 25184  | 27. 91784 | 1. 84E-87  | 4. 13E-86  | 187. 5908 |
| BMF           | 1. 247813 | 2. 479269 | 16. 84556 | 6. 19E-46  | 4. 22E-45  | 91. 88259 |
| BUB1B         | 1. 81438  | 1. 171153 | 34. 30692 | 8. 46E-109 | 5. 95E-107 | 236. 8205 |
| PLCB2         | 1. 948626 | 2. 71791  | 18. 89645 | 6. 88E-54  | 5. 57E-53  | 110. 1968 |
| INAFM2        | 1. 447968 | 2. 760314 | 25. 67102 | 1. 95E-79  | 3. 28E-78  | 169. 0818 |
| PHGR1         | 2. 882811 | 2. 150656 | 15. 04685 | 5. 37E-39  | 3. 18E-38  | 75. 9186  |
| DISP2         | 1. 044072 | 1. 011734 | 16. 42768 | 2. 57E-44  | 1. 69E-43  | 88. 15771 |
| KNSTRN        | 1. 51583  | 2. 386438 | 25. 7037  | 1. 49E-79  | 2. 51E-78  | 169. 3553 |
| IVD           | 1. 060798 | 4. 351971 | 17. 24771 | 1. 71E-47  | 1. 20E-46  | 95. 47216 |
| CHST14        | 2. 112975 | 3. 028451 | 34. 97944 | 6. 45E-111 | 5. 17E-109 | 241. 7076 |
| C15orf57      | 1. 364361 | 3. 68407  | 22. 58997 | 4. 97E-68  | 5. 80E-67  | 142. 784  |
| RPUSD2        | 1. 414624 | 2. 243758 | 32. 12024 | 9. 57E-102 | 4. 39E-100 | 220. 5451 |
| CASC5         | 1. 265718 | 0. 740661 | 29. 84682 | 3. 88E-94  | 1. 21E-92  | 202. 9913 |
| RAD51         | 2. 063858 | 1. 297054 | 38. 11561 | 1. 76E-120 | 2. 56E-118 | 263. 7807 |
| RMDN3         | 1. 369518 | 4. 074127 | 23. 97703 | 3. 22E-73  | 4. 41E-72  | 154. 7446 |
| GCHFR         | 2. 368868 | 3. 783864 | 29. 85998 | 3. 50E-94  | 1. 09E-92  | 203. 0948 |
| DNAJC17       | 1. 835068 | 4. 212707 | 29. 95977 | 1. 60E-94  | 5. 08E-93  | 203. 8788 |
| ZFYVE19       | 1. 493198 | 3. 902499 | 20. 68751 | 8. 55E-61  | 8. 22E-60  | 126. 1065 |
| PPP1R14D      | 3. 091767 | 1. 642961 | 26. 72862 | 3. 02E-83  | 5. 80E-82  | 177. 8689 |
| P11-532F12.   | 1. 273003 | 3. 908933 | 16. 96339 | 2. 16E-46  | 1. 49E-45  | 92. 93393 |
| SPINT1        | 2. 179977 | 6. 005619 | 24. 09636 | 1. 16E-73  | 1. 62E-72  | 155. 7647 |
| VPS18         | 2. 086472 | 2. 660754 | 40. 98593 | 8. 38E-129 | 2. 16E-126 | 282. 987  |
| DLL4          | 1. 962511 | 2. 024033 | 27. 37208 | 1. 55E-85  | 3. 23E-84  | 183. 1504 |
| INO80         | 1. 166098 | 2. 79829  | 20. 64412 | 1. 25E-60  | 1. 20E-59  | 125. 723  |
| CHP1          | 1. 884781 | 4. 88839  | 26. 17546 | 2. 92E-81  | 5. 22E-80  | 173. 2892 |
| OIP5          | 1. 40713  | 0. 858834 | 28. 28433 | 9. 59E-89  | 2. 28E-87  | 190. 5521 |
| NUSAP1        | 2. 806774 | 2. 116485 | 40. 01213 | 5. 03E-126 | 1. 03E-123 | 276. 5742 |
| NDUFAF1       | 1. 23496  | 3. 122881 | 23. 0759  | 7. 40E-70  | 9. 14E-69  | 146. 9952 |
| RTF1          | 1. 217692 | 3. 197264 | 22. 19319 | 1. 56E-66  | 1. 76E-65  | 139. 3297 |
| ITPKA         | 1. 849793 | 1. 658494 | 18. 71575 | 3. 45E-53  | 2. 74E-52  | 108. 5846 |
| RP11-23P13. ( | -1. 30021 | 2. 07264  | -13. 2942 | 2. 31E-32  | 1. 20E-31  | 60. 67105 |
| EHD4          | 1. 895448 | 3. 633158 | 29. 64407 | 1. 91E-93  | 5. 74E-92  | 201. 3944 |
| TMEM87A       | 1. 603018 | 4. 618519 | 23. 04618 | 9. 56E-70  | 1. 18E-68  | 146. 7383 |
| SNAP23        | 1. 402912 | 4. 382391 | 21. 26286 | 5. 38E-63  | 5. 48E-62  | 131. 1791 |
| RP11-265N6. 1 | 1. 660627 | 1. 163409 | 17. 96687 | 2. 76E-50  | 2. 06E-49  | 101. 8968 |
| LRRC57        | 1. 210272 | 2. 63057  | 21. 76173 | 6. 77E-65  | 7. 26E-64  | 135. 5582 |

|           |           |           |           |            |            |           |
|-----------|-----------|-----------|-----------|------------|------------|-----------|
| HAUS2     | 1. 179723 | 2. 546776 | 21. 74224 | 8. 03E-65  | 8. 59E-64  | 135. 3875 |
| TMEM62    | 1. 749981 | 3. 616931 | 28. 57836 | 9. 05E-90  | 2. 27E-88  | 192. 9161 |
| CCNDBP1   | 1. 29749  | 4. 781074 | 20. 13466 | 1. 14E-58  | 1. 03E-57  | 121. 2124 |
| MAP1A     | 1. 84821  | 1. 324261 | 28. 2849  | 9. 54E-89  | 2. 28E-87  | 190. 5568 |
| CKMT1B    | 2. 867483 | 2. 766225 | 30. 13718 | 4. 00E-95  | 1. 30E-93  | 205. 2694 |
| CKMT1A    | 2. 856328 | 2. 779414 | 29. 14238 | 1. 01E-91  | 2. 80E-90  | 197. 4208 |
| PDIA3     | 2. 093255 | 7. 561957 | 25. 81723 | 5. 76E-80  | 9. 86E-79  | 170. 3043 |
| ELL3      | 1. 45821  | 2. 170111 | 17. 89537 | 5. 24E-50  | 3. 88E-49  | 101. 258  |
| SERF2     | 1. 820424 | 9. 276718 | 19. 99167 | 4. 04E-58  | 3. 62E-57  | 119. 9438 |
| MFAP1     | 1. 500544 | 3. 491748 | 25. 18105 | 1. 19E-77  | 1. 89E-76  | 164. 9673 |
| WDR76     | 1. 118327 | 1. 493413 | 26. 59807 | 8. 86E-83  | 1. 67E-81  | 176. 7913 |
| FRMD5     | 1. 53698  | 0. 858077 | 28. 39856 | 3. 83E-89  | 9. 31E-88  | 191. 4719 |
| CASC4     | 2. 191349 | 4. 346785 | 29. 92237 | 2. 15E-94  | 6. 75E-93  | 203. 585  |
| CTDSPL2   | 1. 233553 | 2. 403708 | 20. 73492 | 5. 63E-61  | 5. 44E-60  | 126. 5253 |
| EIF3J-AS1 | 1. 009269 | 2. 292296 | 17. 69657 | 3. 09E-49  | 2. 26E-48  | 99. 48175 |
| SPG11     | 1. 065353 | 4. 486111 | 17. 12744 | 5. 00E-47  | 3. 48E-46  | 94. 39821 |
| B2M       | 3. 810838 | 10. 95978 | 32. 6745  | 1. 47E-103 | 7. 62E-102 | 224. 7267 |
| TRIM69    | 2. 42453  | 2. 657251 | 33. 85964 | 2. 24E-107 | 1. 43E-105 | 233. 5395 |
| SORD2P    | 1. 982679 | 2. 219661 | 24. 34279 | 1. 43E-74  | 2. 04E-73  | 157. 8665 |
| SORD      | 1. 853115 | 3. 193104 | 26. 10096 | 5. 43E-81  | 9. 60E-80  | 172. 6697 |
| DUOX2     | 4. 485908 | 2. 593857 | 27. 63146 | 1. 88E-86  | 4. 06E-85  | 185. 2653 |
| DUOX2     | 4. 45865  | 2. 401419 | 26. 38179 | 5. 29E-82  | 9. 72E-81  | 175. 0017 |
| DUOX1     | 1. 897709 | 1. 14434  | 21. 24019 | 6. 57E-63  | 6. 67E-62  | 130. 9797 |
| DUOX1     | 1. 57053  | 1. 593491 | 20. 59899 | 1. 87E-60  | 1. 78E-59  | 125. 3241 |
| SHF       | 2. 38413  | 2. 094594 | 33. 7524  | 4. 92E-107 | 3. 09E-105 | 232. 7492 |
| GATM      | -3. 13204 | 7. 352585 | -20. 7976 | 3. 24E-61  | 3. 14E-60  | 127. 0785 |
| C15orf48  | 4. 72348  | 4. 251824 | 35. 88016 | 1. 02E-113 | 9. 70E-112 | 248. 1669 |
| BLOC1S6   | 1. 000059 | 3. 481408 | 16. 16899 | 2. 57E-43  | 1. 66E-42  | 85. 85547 |
| SQRDL     | 1. 946675 | 4. 852819 | 26. 99273 | 3. 45E-84  | 6. 85E-83  | 180. 0427 |
| SEMA6D    | -1. 35105 | 1. 872239 | -18. 9201 | 5. 57E-54  | 4. 53E-53  | 110. 4074 |
| MYEF2     | -1. 17679 | 3. 162093 | -14. 0558 | 3. 19E-35  | 1. 74E-34  | 67. 24377 |
| DUT       | 1. 245449 | 5. 297805 | 18. 19403 | 3. 63E-51  | 2. 76E-50  | 103. 9262 |
| FBN1      | 3. 811777 | 3. 738889 | 32. 90852 | 2. 56E-104 | 1. 37E-102 | 226. 4807 |
| EID1      | 2. 026064 | 5. 453589 | 27. 50131 | 5. 41E-86  | 1. 15E-84  | 184. 2051 |
| COPS2     | 1. 163849 | 4. 372985 | 16. 28769 | 8. 94E-44  | 5. 82E-43  | 86. 91142 |
| GALK2     | 1. 360001 | 3. 445377 | 22. 88878 | 3. 73E-69  | 4. 51E-68  | 145. 3761 |
| FGF7      | 1. 438958 | 2. 171957 | 10. 979   | 5. 50E-24  | 2. 39E-23  | 41. 45215 |
| GABPB1    | 1. 382719 | 2. 843016 | 26. 33317 | 7. 91E-82  | 1. 44E-80  | 174. 5986 |
| USP8      | 1. 112485 | 3. 548928 | 19. 26415 | 2. 60E-55  | 2. 18E-54  | 113. 4743 |
| TNFAIP8L3 | 1. 199968 | 1. 063241 | 19. 06667 | 1. 51E-54  | 1. 24E-53  | 111. 7146 |
| LYSMD2    | 1. 514571 | 3. 206466 | 25. 09297 | 2. 49E-77  | 3. 91E-76  | 164. 2248 |
| TMOD3     | 2. 211804 | 3. 085688 | 30. 68537 | 5. 63E-97  | 2. 01E-95  | 209. 5415 |
| LEO1      | 1. 739002 | 2. 881427 | 32. 28011 | 2. 86E-102 | 1. 36E-100 | 221. 7552 |
| MAPK6     | 1. 75553  | 2. 652605 | 28. 96979 | 3. 98E-91  | 1. 07E-89  | 196. 0466 |
| GNB5      | 1. 34132  | 3. 540055 | 19. 55269 | 1. 99E-56  | 1. 72E-55  | 116. 0429 |
| MYO5A     | 1. 101809 | 1. 852169 | 17. 43574 | 3. 18E-48  | 2. 27E-47  | 97. 15152 |
| ARPP19    | 1. 707442 | 4. 091024 | 26. 35268 | 6. 73E-82  | 1. 23E-80  | 174. 7603 |
| ONECUT1   | -1. 67277 | 2. 015461 | -17. 9723 | 2. 63E-50  | 1. 96E-49  | 101. 9455 |
| WDR72     | 1. 603017 | 1. 726116 | 14. 05621 | 3. 18E-35  | 1. 74E-34  | 67. 24733 |
| RAB27A    | 1. 218309 | 3. 574356 | 16. 47345 | 1. 71E-44  | 1. 13E-43  | 88. 56535 |
| PIGBOS1   | 1. 291801 | 3. 070455 | 26. 61543 | 7. 68E-83  | 1. 45E-81  | 176. 9347 |
| PIGB      | 1. 380767 | 2. 976335 | 26. 29736 | 1. 06E-81  | 1. 93E-80  | 174. 3015 |
| NEDD4     | 1. 103714 | 1. 343498 | 22. 75651 | 1. 17E-68  | 1. 40E-67  | 144. 2297 |
| TEX9      | 1. 235905 | 1. 793215 | 20. 99886 | 5. 49E-62  | 5. 43E-61  | 128. 8543 |

|               |           |           |           |            |            |           |
|---------------|-----------|-----------|-----------|------------|------------|-----------|
| MNS1          | 1. 48186  | 1. 420784 | 24. 55531 | 2. 34E-75  | 3. 46E-74  | 159. 6739 |
| TCF12         | 1. 81607  | 3. 414132 | 27. 28018 | 3. 28E-85  | 6. 75E-84  | 182. 3991 |
| AQP9          | 1. 498406 | 1. 013821 | 18. 51435 | 2. 08E-52  | 1. 63E-51  | 106. 7869 |
| RP11-50C13. 1 | 1. 034058 | 1. 114852 | 21. 51696 | 5. 78E-64  | 6. 04E-63  | 133. 412  |
| ADAM10        | 2. 44267  | 4. 041114 | 27. 48606 | 6. 13E-86  | 1. 30E-84  | 184. 0808 |
| FAM63B        | 1. 346425 | 1. 825814 | 23. 75698 | 2. 12E-72  | 2. 82E-71  | 152. 8597 |
| RP11-30K9. 5  | 1. 062541 | 1. 32868  | 15. 06696 | 4. 50E-39  | 2. 67E-38  | 76. 09582 |
| RNF111        | 1. 181011 | 2. 941764 | 21. 5792  | 3. 35E-64  | 3. 52E-63  | 133. 9581 |
| CCNB2         | 2. 956201 | 1. 768964 | 43. 61174 | 4. 48E-136 | 2. 10E-133 | 299. 7711 |
| MYO1E         | 3. 397724 | 4. 388014 | 44. 06132 | 2. 74E-137 | 1. 37E-134 | 302. 5728 |
| FAM81A        | 1. 515073 | 1. 148624 | 28. 64857 | 5. 16E-90  | 1. 32E-88  | 193. 479  |
| P11-356M20.   | 1. 826264 | 1. 135796 | 20. 55177 | 2. 84E-60  | 2. 68E-59  | 124. 9066 |
| GCNT3         | 5. 351854 | 3. 217052 | 41. 47866 | 3. 42E-130 | 9. 72E-128 | 286. 1924 |
| GTF2A2        | 2. 253932 | 5. 269273 | 35. 88316 | 1. 00E-113 | 9. 53E-112 | 248. 1883 |
| ANXA2         | 4. 001636 | 8. 706859 | 38. 25258 | 6. 90E-121 | 1. 02E-118 | 264. 7184 |
| ICE2          | 1. 028857 | 3. 260268 | 19. 00178 | 2. 69E-54  | 2. 20E-53  | 111. 1361 |
| C2CD4B        | -2. 14153 | 3. 476218 | -17. 1437 | 4. 32E-47  | 3. 01E-46  | 94. 5437  |
| TLN2          | 1. 093459 | 1. 934446 | 19. 08104 | 1. 33E-54  | 1. 09E-53  | 111. 8427 |
| TPM1          | 1. 20764  | 7. 816598 | 9. 223917 | 4. 13E-18  | 1. 57E-17  | 28. 01165 |
| LACTB         | 1. 774048 | 3. 13578  | 30. 37732 | 6. 15E-96  | 2. 08E-94  | 207. 1454 |
| RAB8B         | 2. 136914 | 2. 28443  | 32. 64999 | 1. 77E-103 | 9. 05E-102 | 224. 5425 |
| APH1B         | 1. 836158 | 2. 340187 | 30. 98369 | 5. 62E-98  | 2. 11E-96  | 211. 8505 |
| P11-321G12.   | -1. 3055  | 1. 106976 | -21. 1197 | 1. 89E-62  | 1. 90E-61  | 129. 9195 |
| FAM96A        | 1. 103239 | 4. 924031 | 17. 71357 | 2. 66E-49  | 1. 94E-48  | 99. 6336  |
| SNX1          | 1. 163507 | 5. 030239 | 17. 89896 | 5. 07E-50  | 3. 76E-49  | 101. 2901 |
| PPIB          | 1. 489294 | 8. 475362 | 17. 64625 | 4. 85E-49  | 3. 53E-48  | 99. 03216 |
| KIAA0101      | 3. 266171 | 2. 542379 | 42. 82695 | 6. 19E-134 | 2. 53E-131 | 294. 8308 |
| TRIP4         | 1. 520663 | 3. 517466 | 27. 89598 | 2. 20E-87  | 4. 92E-86  | 187. 4137 |
| ZNF609        | 1. 271382 | 2. 314192 | 23. 25486 | 1. 58E-70  | 1. 99E-69  | 148. 5405 |
| OAZ2          | 1. 388678 | 4. 901884 | 21. 34116 | 2. 70E-63  | 2. 78E-62  | 131. 8677 |
| PIF1          | 1. 278301 | 0. 913692 | 26. 57696 | 1. 05E-82  | 1. 98E-81  | 176. 6169 |
| PLEKH02       | 2. 420301 | 2. 873083 | 33. 94881 | 1. 16E-107 | 7. 56E-106 | 234. 1956 |
| SPG21         | 1. 885165 | 5. 119781 | 30. 9199  | 9. 18E-98  | 3. 41E-96  | 211. 3577 |
| MTFMT         | 1. 337737 | 2. 194268 | 29. 03625 | 2. 35E-91  | 6. 38E-90  | 196. 5762 |
| RASL12        | 1. 758892 | 1. 746862 | 25. 23806 | 7. 35E-78  | 1. 18E-76  | 165. 4474 |
| CILP          | 1. 541874 | 1. 788115 | 12. 46416 | 2. 69E-29  | 1. 31E-28  | 53. 62993 |
| HACD3         | 2. 121389 | 4. 065224 | 34. 56292 | 1. 31E-109 | 9. 68E-108 | 238. 6873 |
| VWA9          | 1. 175524 | 3. 853918 | 21. 26717 | 5. 18E-63  | 5. 28E-62  | 131. 2171 |
| SLC24A1       | 1. 17902  | 1. 90393  | 24. 53114 | 2. 88E-75  | 4. 23E-74  | 159. 4686 |
| RAB11A        | 2. 696594 | 6. 191903 | 35. 70907 | 3. 46E-113 | 3. 18E-111 | 246. 9475 |
| MAP2K1        | 1. 831223 | 4. 140986 | 28. 98616 | 3. 49E-91  | 9. 44E-90  | 196. 1771 |
| SNAPC5        | 1. 231674 | 3. 885656 | 21. 84607 | 3. 24E-65  | 3. 51E-64  | 136. 2967 |
| ZWILCH        | 1. 409909 | 1. 899447 | 27. 69371 | 1. 13E-86  | 2. 47E-85  | 185. 7716 |
| SMAD6         | 1. 532968 | 2. 056623 | 21. 03547 | 3. 98E-62  | 3. 95E-61  | 129. 1771 |
| RP11-798K3. 2 | -1. 68073 | 1. 202506 | -27. 2941 | 2. 93E-85  | 6. 03E-84  | 182. 5131 |
| SMAD3         | 1. 771035 | 3. 853368 | 22. 30887 | 5. 71E-67  | 6. 48E-66  | 140. 3382 |
| AAGAB         | 1. 61079  | 3. 811351 | 29. 53311 | 4. 59E-93  | 1. 35E-91  | 200. 5182 |
| PIAS1         | 1. 164636 | 3. 231472 | 20. 50702 | 4. 21E-60  | 3. 97E-59  | 124. 5107 |
| CALML4        | 2. 518887 | 3. 815332 | 28. 12747 | 3. 39E-88  | 7. 87E-87  | 189. 2867 |
| CLN6          | 1. 525632 | 3. 965459 | 26. 22536 | 1. 93E-81  | 3. 47E-80  | 173. 7038 |
| FEM1B         | 1. 586503 | 2. 669141 | 28. 94799 | 4. 73E-91  | 1. 27E-89  | 195. 8727 |
| ITGA11        | 3. 130227 | 1. 955008 | 29. 22118 | 5. 40E-92  | 1. 51E-90  | 198. 047  |
| ANP32A        | 2. 176154 | 5. 470021 | 31. 00098 | 4. 92E-98  | 1. 86E-96  | 211. 9839 |
| GLCE          | 1. 521531 | 2. 543422 | 27. 26585 | 3. 69E-85  | 7. 56E-84  | 182. 2819 |

|               |           |           |           |            |            |           |
|---------------|-----------|-----------|-----------|------------|------------|-----------|
| KIF23         | 2. 005854 | 1. 451855 | 32. 50376 | 5. 31E-103 | 2. 64E-101 | 223. 4426 |
| RPLP1         | 1. 708236 | 10. 17643 | 16. 91972 | 3. 19E-46  | 2. 19E-45  | 92. 54422 |
| TLE3          | 1. 746356 | 3. 474761 | 23. 84797 | 9. 71E-73  | 1. 31E-71  | 153. 6397 |
| UACA          | 1. 875099 | 4. 195596 | 27. 27052 | 3. 55E-85  | 7. 29E-84  | 182. 3201 |
| LARP6         | 1. 377135 | 2. 873972 | 19. 50311 | 3. 10E-56  | 2. 66E-55  | 115. 6018 |
| LRRC49        | 1. 167647 | 1. 502684 | 23. 67542 | 4. 26E-72  | 5. 61E-71  | 152. 1599 |
| THSD4         | 1. 731428 | 2. 412673 | 21. 75562 | 7. 14E-65  | 7. 66E-64  | 135. 5047 |
| RP11-673C5. 1 | 1. 746987 | 5. 32471  | 23. 9133  | 5. 55E-73  | 7. 53E-72  | 154. 1992 |
| GRAMD2        | 1. 048389 | 0. 726505 | 18. 87709 | 8. 18E-54  | 6. 61E-53  | 110. 0241 |
| PKM           | 3. 995983 | 7. 522662 | 43. 49306 | 9. 40E-136 | 4. 34E-133 | 299. 0281 |
| HEXA          | 1. 850287 | 5. 502933 | 27. 05664 | 2. 04E-84  | 4. 08E-83  | 180. 5674 |
| ARIH1         | 1. 275529 | 4. 319465 | 18. 70845 | 3. 68E-53  | 2. 92E-52  | 108. 5194 |
| NEO1          | 1. 307441 | 3. 5818   | 17. 46007 | 2. 56E-48  | 1. 83E-47  | 97. 36887 |
| NPTN          | 1. 943001 | 5. 424318 | 24. 41579 | 7. 66E-75  | 1. 11E-73  | 158. 4879 |
| CD276         | 2. 685606 | 4. 918594 | 36. 08193 | 2. 45E-114 | 2. 46E-112 | 249. 6005 |
| LOXL1         | 3. 930522 | 4. 229925 | 44. 65226 | 7. 17E-139 | 4. 09E-136 | 306. 2242 |
| STOML1        | 1. 600521 | 3. 163486 | 27. 01851 | 2. 79E-84  | 5. 57E-83  | 180. 2544 |
| PML           | 2. 651314 | 4. 359568 | 36. 82298 | 1. 34E-116 | 1. 53E-114 | 254. 824  |
| ISLR2         | 1. 228702 | 0. 780016 | 23. 4214  | 3. 77E-71  | 4. 83E-70  | 149. 9758 |
| ISLR          | 4. 931248 | 4. 462295 | 44. 68971 | 5. 70E-139 | 3. 35E-136 | 306. 4544 |
| STRA6         | 3. 750047 | 2. 043091 | 38. 33631 | 3. 90E-121 | 5. 91E-119 | 265. 2905 |
| RP11-60L3. 1  | 1. 015697 | 0. 491462 | 15. 67439 | 2. 08E-41  | 1. 29E-40  | 81. 46418 |
| SEMA7A        | 4. 065119 | 2. 455682 | 41. 64938 | 1. 14E-130 | 3. 36E-128 | 287. 2969 |
| UBL7          | 1. 166093 | 4. 560804 | 19. 89879 | 9. 21E-58  | 8. 18E-57  | 119. 1192 |
| CLK3          | 1. 203631 | 4. 80439  | 17. 8876  | 5. 61E-50  | 4. 16E-49  | 101. 1886 |
| EDC3          | 1. 043849 | 3. 00989  | 20. 20607 | 6. 04E-59  | 5. 52E-58  | 121. 8455 |
| CSK           | 2. 288152 | 4. 287347 | 33. 17792 | 3. 44E-105 | 1. 95E-103 | 228. 4914 |
| SCAMP2        | 1. 731526 | 5. 329027 | 25. 85734 | 4. 12E-80  | 7. 08E-79  | 170. 6393 |
| COX5A         | 1. 063265 | 7. 029747 | 14. 0063  | 4. 90E-35  | 2. 67E-34  | 66. 81383 |
| RPP25         | 1. 501805 | 2. 601757 | 25. 37204 | 2. 39E-78  | 3. 88E-77  | 166. 5744 |
| SCAMP5        | -1. 19732 | 4. 040065 | -12. 9656 | 3. 85E-31  | 1. 94E-30  | 57. 86645 |
| C15orf39      | 1. 67213  | 3. 10731  | 28. 32102 | 7. 14E-89  | 1. 72E-87  | 190. 8478 |
| COMMD4        | 1. 978198 | 5. 348786 | 30. 97086 | 6. 20E-98  | 2. 33E-96  | 211. 7513 |
| SIN3A         | 1. 245856 | 3. 326695 | 20. 95729 | 7. 92E-62  | 7. 80E-61  | 128. 4879 |
| PTPN9         | 1. 986751 | 3. 092889 | 33. 85656 | 2. 29E-107 | 1. 46E-105 | 233. 5169 |
| SNUPN         | 1. 61692  | 3. 237237 | 32. 25679 | 3. 41E-102 | 1. 61E-100 | 221. 5788 |
| IMP3          | 1. 326133 | 4. 874662 | 21. 83827 | 3. 47E-65  | 3. 75E-64  | 136. 2284 |
| CSPG4         | 1. 551276 | 1. 589532 | 21. 30287 | 3. 79E-63  | 3. 87E-62  | 131. 531  |
| UBE2Q2        | 1. 570214 | 3. 464942 | 27. 12239 | 1. 19E-84  | 2. 40E-83  | 181. 1068 |
| FBXO22        | 1. 455602 | 3. 184859 | 24. 65312 | 1. 02E-75  | 1. 53E-74  | 160. 5041 |
| NRG4          | -2. 14062 | 2. 656391 | -23. 3119 | 9. 67E-71  | 1. 23E-69  | 149. 0322 |
| C15orf27      | -1. 13113 | 1. 244751 | -28. 418  | 3. 27E-89  | 8. 00E-88  | 191. 6285 |
| ETFA          | 1. 364128 | 5. 625085 | 20. 99304 | 5. 78E-62  | 5. 71E-61  | 128. 803  |
| RCN2          | 1. 608838 | 4. 151763 | 24. 8974  | 1. 30E-76  | 1. 99E-75  | 162. 5731 |
| PSTPIP1       | 1. 800903 | 1. 916944 | 22. 08395 | 4. 06E-66  | 4. 49E-65  | 138. 3762 |
| TSPAN3        | 2. 765713 | 6. 853525 | 31. 55212 | 7. 18E-100 | 2. 97E-98  | 216. 2192 |
| PEAK1         | 1. 354362 | 2. 238598 | 21. 2134  | 8. 31E-63  | 8. 42E-62  | 130. 744  |
| P11-500C12.   | 1. 29041  | 2. 343017 | 18. 56699 | 1. 30E-52  | 1. 02E-51  | 107. 2569 |
| CIB2          | 1. 05367  | 2. 228216 | 16. 08863 | 5. 26E-43  | 3. 37E-42  | 85. 14101 |
| IDH3A         | 1. 430407 | 4. 046503 | 20. 5225  | 3. 67E-60  | 3. 47E-59  | 124. 6477 |
| DNAJA4        | 1. 825972 | 3. 317664 | 16. 15718 | 2. 86E-43  | 1. 84E-42  | 85. 7504  |
| WDR61         | 1. 053535 | 4. 74087  | 19. 39612 | 8. 03E-56  | 6. 81E-55  | 114. 6495 |
| PSMA4         | 2. 200794 | 6. 034002 | 31. 81144 | 9. 95E-101 | 4. 33E-99  | 218. 1988 |
| CHRNA5        | 1. 749097 | 1. 593241 | 22. 32947 | 4. 78E-67  | 5. 43E-66  | 140. 5177 |

|               |           |           |           |            |            |           |
|---------------|-----------|-----------|-----------|------------|------------|-----------|
| ADAMTS7       | 1. 761808 | 1. 230014 | 26. 93146 | 5. 70E-84  | 1. 12E-82  | 179. 5392 |
| MORF4L1       | 2. 030246 | 6. 633994 | 25. 03018 | 4. 23E-77  | 6. 58E-76  | 163. 6949 |
| CTSH          | 2. 873612 | 6. 858547 | 32. 07789 | 1. 32E-101 | 5. 99E-100 | 220. 224  |
| MTHFS         | 1. 150268 | 4. 633423 | 16. 56992 | 7. 23E-45  | 4. 82E-44  | 89. 42479 |
| ST20          | 1. 368196 | 2. 386978 | 21. 12374 | 1. 83E-62  | 1. 83E-61  | 129. 9546 |
| BCL2A1        | 2. 794745 | 1. 806047 | 30. 46962 | 3. 00E-96  | 1. 03E-94  | 207. 8646 |
| ZFAND6        | 1. 993565 | 4. 838495 | 32. 74433 | 8. 74E-104 | 4. 56E-102 | 225. 2507 |
| FAH           | 1. 907421 | 3. 325289 | 32. 3883  | 1. 27E-102 | 6. 10E-101 | 222. 5722 |
| ABHD17C       | 3. 450658 | 3. 411475 | 40. 68544 | 5. 97E-128 | 1. 41E-125 | 281. 0193 |
| CEMIP         | 3. 045342 | 1. 913208 | 29. 8006  | 5. 58E-94  | 1. 73E-92  | 202. 6277 |
| MESDC2        | 1. 259521 | 3. 682284 | 24. 45197 | 5. 64E-75  | 8. 20E-74  | 158. 7956 |
| MESDC1        | 1. 008519 | 2. 675557 | 18. 68829 | 4. 41E-53  | 3. 50E-52  | 108. 3396 |
| IL16          | 2. 073013 | 2. 165355 | 21. 55491 | 4. 14E-64  | 4. 35E-63  | 133. 7451 |
| EFTUD1        | 1. 597071 | 2. 459513 | 30. 03083 | 9. 18E-95  | 2. 95E-93  | 204. 4362 |
| RP13-608F4. 5 | 1. 058081 | 3. 715754 | 9. 544405 | 3. 82E-19  | 1. 49E-18  | 30. 37311 |
| HOMER2        | -1. 87822 | 4. 93664  | -16. 9194 | 3. 20E-46  | 2. 19E-45  | 92. 5417  |
| FAM103A1      | 1. 481134 | 3. 454559 | 29. 25648 | 4. 08E-92  | 1. 15E-90  | 198. 3273 |
| C15orf40      | 1. 384445 | 3. 509968 | 25. 45951 | 1. 15E-78  | 1. 88E-77  | 167. 309  |
| BTBD1         | 1. 813766 | 3. 632335 | 29. 36127 | 1. 78E-92  | 5. 09E-91  | 199. 1583 |
| TM6SF1        | 1. 467323 | 1. 259715 | 20. 80631 | 3. 00E-61  | 2. 91E-60  | 127. 1558 |
| HDGFRP3       | 2. 10388  | 2. 728281 | 24. 55087 | 2. 43E-75  | 3. 59E-74  | 159. 6362 |
| GOLGA6L5P     | -1. 18659 | 2. 54253  | -16. 2232 | 1. 59E-43  | 1. 03E-42  | 86. 33743 |
| NMB           | 1. 547406 | 2. 740633 | 21. 05872 | 3. 24E-62  | 3. 23E-61  | 129. 3819 |
| SEC11A        | 1. 402086 | 6. 27258  | 21. 0915  | 2. 43E-62  | 2. 43E-61  | 129. 6707 |
| AKAP13        | 1. 433838 | 4. 985247 | 19. 41548 | 6. 76E-56  | 5. 74E-55  | 114. 8219 |
| KLHL25        | 2. 001892 | 1. 729448 | 33. 19838 | 2. 96E-105 | 1. 68E-103 | 228. 6438 |
| MRPL46        | 1. 463883 | 3. 547176 | 28. 88718 | 7. 68E-91  | 2. 04E-89  | 195. 3875 |
| MRPS11        | 1. 351759 | 4. 474208 | 24. 24251 | 3. 35E-74  | 4. 74E-73  | 157. 0119 |
| ISG20         | 3. 588745 | 4. 044287 | 39. 39973 | 2. 97E-124 | 5. 39E-122 | 272. 4875 |
| ACAN          | 1. 173345 | 0. 806389 | 18. 99979 | 2. 74E-54  | 2. 24E-53  | 111. 1184 |
| HAPLN3        | 3. 196519 | 2. 420147 | 38. 99158 | 4. 60E-123 | 7. 77E-121 | 269. 7405 |
| MFGES         | 2. 470022 | 5. 51676  | 24. 38838 | 9. 67E-75  | 1. 39E-73  | 158. 2546 |
| ABHD2         | 1. 920981 | 4. 678044 | 20. 11628 | 1. 34E-58  | 1. 21E-57  | 121. 0494 |
| P11-326A19.   | 1. 395489 | 5. 431452 | 14. 32114 | 3. 15E-36  | 1. 76E-35  | 69. 55446 |
| FANCI         | 1. 910834 | 1. 901784 | 32. 08035 | 1. 29E-101 | 5. 88E-100 | 220. 2427 |
| POLG          | 1. 124422 | 4. 383582 | 17. 62662 | 5. 78E-49  | 4. 19E-48  | 98. 85677 |
| KIF7          | 1. 284586 | 1. 142787 | 26. 98049 | 3. 81E-84  | 7. 56E-83  | 179. 9421 |
| ANPEP         | -2. 88622 | 6. 75393  | -19. 2393 | 3. 24E-55  | 2. 71E-54  | 113. 2531 |
| SEMA4B        | 1. 692787 | 5. 120372 | 15. 72601 | 1. 32E-41  | 8. 21E-41  | 81. 92177 |
| CIB1          | 1. 223222 | 6. 771443 | 14. 09392 | 2. 29E-35  | 1. 25E-34  | 67. 57511 |
| GDPGP1        | 1. 032797 | 1. 642479 | 20. 73912 | 5. 42E-61  | 5. 24E-60  | 126. 5624 |
| NGRN          | 1. 935042 | 4. 775644 | 31. 47381 | 1. 31E-99  | 5. 33E-98  | 215. 6197 |
| IQGAP1        | 2. 262987 | 5. 452766 | 31. 3871  | 2. 53E-99  | 1. 02E-97  | 214. 9551 |
| CRTC3         | 1. 451876 | 3. 040392 | 24. 10159 | 1. 11E-73  | 1. 55E-72  | 155. 8093 |
| BLM           | 1. 545227 | 1. 063055 | 35. 61546 | 6. 74E-113 | 6. 07E-111 | 246. 2789 |
| FES           | 1. 157111 | 3. 171114 | 9. 94756  | 1. 80E-20  | 7. 25E-20  | 33. 40637 |
| MAN2A2        | -1. 06385 | 4. 667923 | -13. 3369 | 1. 60E-32  | 8. 33E-32  | 61. 03715 |
| UNC45A        | 1. 131006 | 4. 738279 | 18. 78917 | 1. 79E-53  | 1. 43E-52  | 109. 2397 |
| PRC1          | 2. 144168 | 3. 126668 | 29. 29042 | 3. 12E-92  | 8. 83E-91  | 198. 5966 |
| VPS33B        | 1. 196352 | 3. 017339 | 23. 71371 | 3. 07E-72  | 4. 06E-71  | 152. 4885 |
| AC068831. 17  | -1. 28643 | 0. 799541 | -27. 2852 | 3. 15E-85  | 6. 48E-84  | 182. 4398 |
| SLC03A1       | 2. 310566 | 2. 812322 | 31. 42741 | 1. 86E-99  | 7. 53E-98  | 215. 2642 |
| LINC00930     | -1. 05913 | 0. 998046 | -13. 1631 | 7. 12E-32  | 3. 65E-31  | 59. 54978 |
| LINC01578     | 1. 227931 | 5. 497507 | 16. 78184 | 1. 09E-45  | 7. 42E-45  | 91. 31414 |

|              |           |           |           |            |            |           |
|--------------|-----------|-----------|-----------|------------|------------|-----------|
| NR2F2        | 1. 710321 | 3. 99237  | 21. 60415 | 2. 69E-64  | 2. 84E-63  | 134. 177  |
| CTD-2147F2.1 | 1. 566708 | 0. 796655 | 12. 25102 | 1. 61E-28  | 7. 73E-28  | 51. 84614 |
| TTC23        | 1. 120567 | 2. 715272 | 21. 32288 | 3. 18E-63  | 3. 25E-62  | 131. 707  |
| MEF2A        | 1. 265546 | 3. 305944 | 19. 14659 | 7. 40E-55  | 6. 15E-54  | 112. 4269 |
| LINS         | 1. 108671 | 2. 365    | 21. 43619 | 1. 17E-63  | 1. 22E-62  | 132. 7028 |
| ASB7         | 1. 233917 | 1. 639983 | 31. 61814 | 4. 34E-100 | 1. 82E-98  | 216. 724  |
| ALDH1A3      | 2. 225189 | 3. 08     | 21. 0517  | 3. 45E-62  | 3. 43E-61  | 129. 32   |
| CHSY1        | 2. 415713 | 2. 783098 | 31. 96385 | 3. 13E-101 | 1. 39E-99  | 219. 3583 |
| SNRPA1       | 1. 244008 | 4. 747449 | 18. 97874 | 3. 30E-54  | 2. 70E-53  | 110. 9307 |
| PCSK6        | 2. 09012  | 2. 130277 | 27. 42598 | 9. 99E-86  | 2. 10E-84  | 183. 5905 |
| TM2D3        | 1. 213844 | 4. 490056 | 21. 10649 | 2. 13E-62  | 2. 13E-61  | 129. 8028 |
| POLR3K       | 1. 841366 | 2. 704397 | 39. 49503 | 1. 57E-124 | 2. 90E-122 | 273. 1262 |
| SNRNP25      | 1. 229283 | 3. 768127 | 25. 57206 | 4. 46E-79  | 7. 43E-78  | 168. 253  |
| RHBDF1       | 1. 563528 | 4. 355142 | 19. 05099 | 1. 74E-54  | 1. 43E-53  | 111. 5749 |
| MPG          | 1. 408708 | 5. 165103 | 20. 55192 | 2. 83E-60  | 2. 68E-59  | 124. 9078 |
| ITFG3        | 1. 391526 | 5. 085968 | 21. 34928 | 2. 52E-63  | 2. 59E-62  | 131. 9391 |
| RGS11        | -1. 32048 | 2. 663183 | -15. 7584 | 9. 90E-42  | 6. 18E-41  | 82. 20874 |
| ARHGDI6      | -4. 04926 | 3. 610674 | -37. 5282 | 9. 96E-119 | 1. 30E-116 | 259. 7346 |
| PDIA2        | -5. 90635 | 6. 405383 | -26. 2009 | 2. 37E-81  | 4. 24E-80  | 173. 5008 |
| AXIN1        | 1. 526338 | 3. 351854 | 27. 74335 | 7. 57E-87  | 1. 66E-85  | 186. 1751 |
| MRPL28       | 2. 028003 | 4. 809377 | 30. 99219 | 5. 26E-98  | 1. 98E-96  | 211. 916  |
| NME4         | 1. 794739 | 5. 190506 | 23. 69094 | 3. 73E-72  | 4. 92E-71  | 152. 2931 |
| C16orf13     | 1. 608121 | 5. 304436 | 22. 64352 | 3. 12E-68  | 3. 67E-67  | 143. 2492 |
| MSLN         | 7. 134377 | 3. 717462 | 48. 90684 | 7. 94E-150 | 1. 07E-146 | 331. 5131 |
| STUB1        | 1. 509084 | 6. 058395 | 23. 27236 | 1. 36E-70  | 1. 72E-69  | 148. 6915 |
| JMJD8        | 1. 051942 | 5. 154072 | 17. 35112 | 6. 78E-48  | 4. 80E-47  | 96. 39571 |
| FAM173A      | 1. 065539 | 4. 000596 | 12. 32899 | 8. 39E-29  | 4. 04E-28  | 52. 49746 |
| CCDC78       | 1. 055398 | 1. 161415 | 15. 6761  | 2. 05E-41  | 1. 27E-40  | 81. 47934 |
| HAGHL        | 1. 896763 | 2. 429606 | 22. 38532 | 2. 94E-67  | 3. 36E-66  | 141. 004  |
| RPUSD1       | 1. 077435 | 3. 27737  | 18. 75877 | 2. 35E-53  | 1. 87E-52  | 108. 9685 |
| CACNA1H      | 1. 307325 | 2. 438848 | 15. 81772 | 5. 84E-42  | 3. 66E-41  | 82. 73516 |
| TPSB2        | 2. 476203 | 3. 85252  | 17. 41889 | 3. 70E-48  | 2. 64E-47  | 97. 00099 |
| TPSAB1       | 2. 433699 | 4. 021155 | 20. 012   | 3. 37E-58  | 3. 03E-57  | 120. 1242 |
| UBE2I        | 1. 901935 | 5. 370507 | 28. 1079  | 3. 97E-88  | 9. 18E-87  | 189. 1286 |
| TSR3         | 1. 229199 | 5. 112676 | 19. 54803 | 2. 08E-56  | 1. 79E-55  | 116. 0014 |
| GNPTG        | 1. 310542 | 5. 114228 | 23. 46595 | 2. 57E-71  | 3. 31E-70  | 150. 3593 |
| C16orf91     | 1. 790833 | 2. 901728 | 37. 42741 | 2. 00E-118 | 2. 55E-116 | 259. 0364 |
| A16c-390E6   | 1. 36067  | 2. 154488 | 10. 96894 | 5. 97E-24  | 2. 59E-23  | 41. 37188 |
| IFT140       | 1. 056641 | 2. 738806 | 18. 87539 | 8. 30E-54  | 6. 71E-53  | 110. 0089 |
| TMEM204      | 2. 065936 | 3. 744267 | 23. 57874 | 9. 75E-72  | 1. 27E-70  | 151. 3294 |
| HN1L         | 1. 768858 | 4. 382707 | 25. 76719 | 8. 74E-80  | 1. 49E-78  | 169. 8862 |
| MRPS34       | 1. 222183 | 5. 887994 | 17. 72246 | 2. 46E-49  | 1. 80E-48  | 99. 71305 |
| FAHD1        | 1. 831758 | 3. 200791 | 32. 41825 | 1. 01E-102 | 4. 91E-101 | 222. 7982 |
| RPL3L        | -1. 19572 | 0. 847996 | -8. 73478 | 1. 43E-16  | 5. 25E-16  | 24. 49879 |
| NDUFB10      | 1. 238204 | 6. 388489 | 18. 61291 | 8. 63E-53  | 6. 81E-52  | 107. 6668 |
| TBL3         | 1. 344731 | 4. 558855 | 20. 49433 | 4. 71E-60  | 4. 43E-59  | 124. 3984 |
| NOXO1        | 1. 486339 | 1. 052391 | 15. 30085 | 5. 70E-40  | 3. 44E-39  | 78. 15919 |
| SYNGR3       | 1. 196541 | 0. 970236 | 18. 29872 | 1. 43E-51  | 1. 10E-50  | 104. 8613 |
| SLC9A3R2     | 2. 317968 | 5. 3882   | 26. 71227 | 3. 46E-83  | 6. 62E-82  | 177. 734  |
| NTHL1        | 1. 978631 | 3. 5326   | 28. 94335 | 4. 91E-91  | 1. 31E-89  | 195. 8357 |
| P11-304L19   | 2. 487231 | 1. 571315 | 30. 38909 | 5. 61E-96  | 1. 90E-94  | 207. 2372 |
| P11-304L19   | 2. 090776 | 1. 602953 | 26. 74502 | 2. 64E-83  | 5. 08E-82  | 178. 0041 |
| RAB26        | -1. 60361 | 3. 426344 | -14. 9675 | 1. 08E-38  | 6. 36E-38  | 75. 21997 |
| TRAF7        | 1. 58935  | 4. 642782 | 22. 91332 | 3. 02E-69  | 3. 66E-68  | 145. 5887 |

|             |           |           |           |            |            |           |
|-------------|-----------|-----------|-----------|------------|------------|-----------|
| PGP         | 1. 273446 | 2. 537408 | 24. 74044 | 4. 89E-76  | 7. 36E-75  | 161. 2445 |
| RNPS1       | 1. 795038 | 5. 949697 | 25. 97958 | 1. 49E-80  | 2. 59E-79  | 171. 659  |
| AC009065.4  | 2. 235965 | 1. 065413 | 40. 67577 | 6. 36E-128 | 1. 50E-125 | 280. 9558 |
| CCNF        | 1. 31587  | 1. 161906 | 32. 79761 | 5. 87E-104 | 3. 08E-102 | 225. 6502 |
| C16orf59    | 1. 262131 | 1. 016849 | 26. 03318 | 9. 53E-81  | 1. 67E-79  | 172. 1055 |
| ATP6VOC     | 1. 82243  | 6. 622525 | 23. 84237 | 1. 02E-72  | 1. 37E-71  | 153. 5918 |
| AMDHD2      | 1. 253218 | 3. 454645 | 19. 44387 | 5. 25E-56  | 4. 47E-55  | 115. 0746 |
| KCTD5       | 2. 270472 | 3. 269346 | 39. 86338 | 1. 35E-125 | 2. 69E-123 | 275. 5854 |
| TCEB2       | 2. 543668 | 7. 363556 | 33. 5492  | 2. 20E-106 | 1. 32E-104 | 231. 2479 |
| PRSS21      | 1. 935714 | 1. 763947 | 13. 26654 | 2. 93E-32  | 1. 52E-31  | 60. 4342  |
| ZG16B       | 4. 522729 | 3. 018016 | 32. 95996 | 1. 75E-104 | 9. 41E-103 | 226. 8653 |
| PRSS22      | 2. 05119  | 4. 545036 | 19. 21486 | 4. 03E-55  | 3. 37E-54  | 113. 0353 |
| FLYWCH2     | 2. 066663 | 3. 6263   | 35. 31639 | 5. 72E-112 | 4. 86E-110 | 244. 1355 |
| PKMYT1      | 2. 820257 | 2. 164362 | 35. 83703 | 1. 39E-113 | 1. 31E-111 | 247. 8598 |
| PAQR4       | 1. 697855 | 3. 19901  | 25. 22294 | 8. 35E-78  | 1. 33E-76  | 165. 3201 |
| TNFRSF12A   | 2. 323174 | 6. 086945 | 21. 79995 | 4. 85E-65  | 5. 22E-64  | 135. 8929 |
| HCFC1R1     | 2. 708339 | 5. 515179 | 34. 59337 | 1. 05E-109 | 7. 81E-108 | 238. 9089 |
| THOC6       | 1. 619537 | 3. 88932  | 27. 55798 | 3. 41E-86  | 7. 29E-85  | 184. 667  |
| CCDC64B     | -1. 5517  | 5. 227038 | -15. 1049 | 3. 22E-39  | 1. 91E-38  | 76. 43022 |
| P11-473M20. | -1. 74519 | 1. 854005 | -26. 1328 | 4. 17E-81  | 7. 40E-80  | 172. 9346 |
| IL32        | 1. 01663  | 8. 166058 | 8. 812971 | 8. 16E-17  | 3. 02E-16  | 25. 05264 |
| ZNF200      | 1. 066801 | 1. 579239 | 24. 93061 | 9. 80E-77  | 1. 51E-75  | 162. 8539 |
| ZNF263      | 1. 162105 | 3. 565424 | 21. 19238 | 1. 00E-62  | 1. 01E-61  | 130. 5589 |
| ZNF174      | 1. 067646 | 2. 175476 | 25. 16788 | 1. 33E-77  | 2. 10E-76  | 164. 8564 |
| CLUAP1      | 1. 55107  | 3. 236718 | 28. 14646 | 2. 91E-88  | 6. 78E-87  | 189. 44   |
| DNASE1      | -1. 08767 | 3. 60202  | -10. 4518 | 3. 61E-22  | 1. 50E-21  | 37. 29157 |
| GLIS2       | 1. 970633 | 3. 403054 | 21. 53579 | 4. 90E-64  | 5. 13E-63  | 133. 5772 |
| COR07       | 1. 50952  | 3. 642856 | 22. 59677 | 4. 68E-68  | 5. 48E-67  | 142. 8431 |
| VASN        | 1. 922096 | 3. 142138 | 21. 18243 | 1. 09E-62  | 1. 10E-61  | 130. 4714 |
| NMRAL1      | 1. 210178 | 4. 834077 | 20. 31109 | 2. 38E-59  | 2. 20E-58  | 122. 7762 |
| HMOX2       | 1. 952828 | 4. 881635 | 32. 12846 | 9. 00E-102 | 4. 14E-100 | 220. 6074 |
| MGRN1       | 1. 113363 | 4. 229556 | 17. 71615 | 2. 60E-49  | 1. 90E-48  | 99. 65667 |
| NUDT16L1    | 1. 105566 | 3. 775432 | 21. 32594 | 3. 09E-63  | 3. 17E-62  | 131. 7339 |
| SMIM22      | 2. 34397  | 6. 883928 | 24. 23928 | 3. 44E-74  | 4. 87E-73  | 156. 9844 |
| GLYR1       | 1. 129646 | 4. 564327 | 18. 13676 | 6. 06E-51  | 4. 58E-50  | 103. 4146 |
| UBN1        | 1. 120987 | 3. 157336 | 19. 46644 | 4. 29E-56  | 3. 67E-55  | 115. 2755 |
| PPL         | 2. 498316 | 3. 545933 | 25. 64251 | 2. 48E-79  | 4. 16E-78  | 168. 8432 |
| NAGPA       | 1. 204602 | 2. 682119 | 24. 5416  | 2. 63E-75  | 3. 87E-74  | 159. 5575 |
| ALG1        | 1. 019815 | 3. 916557 | 20. 25598 | 3. 88E-59  | 3. 56E-58  | 122. 2879 |
| EEF2KMT     | 1. 052302 | 2. 547344 | 22. 98126 | 1. 68E-69  | 2. 05E-68  | 146. 1767 |
| ABAT        | -1. 18571 | 3. 497579 | -12. 7955 | 1. 64E-30  | 8. 14E-30  | 56. 4236  |
| CARHSP1     | 2. 082728 | 5. 435085 | 29. 24998 | 4. 30E-92  | 1. 21E-90  | 198. 2757 |
| C16orf72    | 1. 403828 | 3. 134091 | 27. 11773 | 1. 24E-84  | 2. 49E-83  | 181. 0686 |
| EMP2        | 2. 613053 | 3. 758391 | 35. 86635 | 1. 13E-113 | 1. 07E-111 | 248. 0686 |
| CIITA       | 1. 965419 | 1. 986625 | 24. 07329 | 1. 42E-73  | 1. 96E-72  | 155. 5676 |
| DEXI        | 1. 189467 | 4. 23622  | 22. 44079 | 1. 81E-67  | 2. 09E-66  | 141. 4869 |
| P11-876N24. | 1. 073607 | 1. 412101 | 14. 81948 | 3. 98E-38  | 2. 32E-37  | 73. 91832 |
| CLEC16A     | 1. 368817 | 2. 710736 | 25. 75069 | 1. 00E-79  | 1. 70E-78  | 169. 7483 |
| RMI2        | 2. 588086 | 1. 85439  | 42. 45657 | 6. 48E-133 | 2. 38E-130 | 292. 4769 |
| SOCS1       | 1. 74102  | 1. 881263 | 21. 70739 | 1. 09E-64  | 1. 16E-63  | 135. 0822 |
| LITAF       | 2. 862123 | 5. 346821 | 36. 5646  | 8. 17E-116 | 8. 95E-114 | 253. 0101 |
| SNN         | 1. 553087 | 2. 492538 | 23. 37418 | 5. 66E-71  | 7. 21E-70  | 149. 5692 |
| GSPT1       | 1. 143633 | 5. 00215  | 16. 94549 | 2. 54E-46  | 1. 74E-45  | 92. 77417 |
| TNFRSF17    | 1. 034645 | 0. 586287 | 14. 24548 | 6. 10E-36  | 3. 38E-35  | 68. 89459 |

|               |           |           |           |            |            |           |
|---------------|-----------|-----------|-----------|------------|------------|-----------|
| SNX29         | 1. 513607 | 1. 729044 | 27. 98617 | 1. 06E-87  | 2. 40E-86  | 188. 1441 |
| CPPED1        | 2. 090174 | 2. 117991 | 35. 16974 | 1. 64E-111 | 1. 36E-109 | 243. 0805 |
| PARN          | 1. 524674 | 3. 717022 | 28. 48065 | 1. 98E-89  | 4. 89E-88  | 192. 1317 |
| BFAR          | 1. 257468 | 4. 910544 | 17. 11137 | 5. 77E-47  | 4. 02E-46  | 94. 25473 |
| PLA2G10       | 2. 361849 | 2. 634996 | 19. 66141 | 7. 59E-57  | 6. 61E-56  | 117. 0098 |
| RP11-719K4. 5 | 3. 215174 | 2. 396158 | 23. 59717 | 8. 33E-72  | 1. 09E-70  | 151. 4878 |
| NTAN1         | 1. 747379 | 4. 007863 | 27. 8524  | 3. 13E-87  | 6. 97E-86  | 187. 0603 |
| RRN3          | 1. 174203 | 3. 382018 | 15. 71871 | 1. 41E-41  | 8. 75E-41  | 81. 85703 |
| MPV17L        | -1. 13737 | 2. 153571 | -17. 8532 | 7. 63E-50  | 5. 65E-49  | 100. 8811 |
| C16orf45      | 1. 346385 | 3. 769178 | 14. 10576 | 2. 06E-35  | 1. 13E-34  | 67. 67807 |
| NDE1          | 2. 75929  | 2. 713499 | 40. 06904 | 3. 45E-126 | 7. 15E-124 | 276. 9518 |
| CTB-193M12. 5 | 2. 376886 | 1. 726479 | 41. 93894 | 1. 77E-131 | 5. 75E-129 | 289. 163  |
| MYH11         | 2. 501852 | 3. 487841 | 17. 68284 | 3. 50E-49  | 2. 55E-48  | 99. 35904 |
| AF001548. 5   | 1. 426557 | 1. 235815 | 22. 07872 | 4. 25E-66  | 4. 70E-65  | 138. 3306 |
| ABCC1         | 1. 602674 | 3. 088376 | 26. 41337 | 4. 07E-82  | 7. 51E-81  | 175. 2633 |
| ABCC6         | -1. 03046 | 2. 58053  | -13. 869  | 1. 62E-34  | 8. 73E-34  | 65. 62268 |
| NOM03         | -1. 04041 | 4. 2166   | -12. 0574 | 8. 12E-28  | 3. 84E-27  | 50. 23542 |
| PKD1P1        | -1. 15034 | 1. 691532 | -12. 5395 | 1. 43E-29  | 6. 97E-29  | 54. 26281 |
| XYLT1         | 1. 52192  | 1. 649845 | 24. 05972 | 1. 59E-73  | 2. 20E-72  | 155. 4516 |
| ARL6IP1       | 2. 961853 | 5. 639037 | 36. 67773 | 3. 69E-116 | 4. 12E-114 | 253. 8053 |
| TMC7          | 2. 267873 | 1. 465337 | 23. 04916 | 9. 32E-70  | 1. 15E-68  | 146. 7641 |
| COQ7          | 1. 239635 | 2. 807752 | 27. 20259 | 6. 19E-85  | 1. 26E-83  | 181. 764  |
| ITPRIPL2      | 1. 679752 | 2. 823004 | 25. 14345 | 1. 63E-77  | 2. 58E-76  | 164. 6505 |
| P11-626G11. 2 | 0. 21288  | 3. 608497 | 30. 75991 | 3. 16E-97  | 1. 14E-95  | 210. 1195 |
| SYT17         | 1. 774101 | 1. 924546 | 25. 8154  | 5. 85E-80  | 1. 00E-78  | 170. 2891 |
| CTA-363E6. 2  | 1. 374938 | 0. 710021 | 16. 20793 | 1. 82E-43  | 1. 18E-42  | 86. 20176 |
| TMC5          | 4. 751717 | 3. 371281 | 42. 63301 | 2. 11E-133 | 8. 14E-131 | 293. 6    |
| GDE1          | 1. 627274 | 4. 543872 | 24. 77929 | 3. 52E-76  | 5. 32E-75  | 161. 5735 |
| C16orf62      | 1. 515171 | 3. 679897 | 25. 85031 | 4. 37E-80  | 7. 50E-79  | 170. 5806 |
| KNOP1         | 1. 641646 | 3. 22552  | 27. 35643 | 1. 76E-85  | 3. 66E-84  | 183. 0225 |
| IQCK          | 1. 183096 | 2. 913322 | 18. 71687 | 3. 41E-53  | 2. 72E-52  | 108. 5946 |
| GPRC5B        | 1. 024726 | 3. 933931 | 11. 65326 | 2. 30E-26  | 1. 05E-25  | 46. 90465 |
| GP2           | -8. 50303 | 9. 371874 | -25. 6608 | 2. 13E-79  | 3. 57E-78  | 168. 9959 |
| UMOD          | -1. 34665 | 0. 886022 | -24. 5056 | 3. 57E-75  | 5. 24E-74  | 159. 2516 |
| DCUN1D3       | 1. 055104 | 1. 946271 | 20. 46076 | 6. 34E-60  | 5. 94E-59  | 124. 1014 |
| LYRM1         | 1. 029657 | 3. 937955 | 16. 81365 | 8. 23E-46  | 5. 60E-45  | 91. 59786 |
| TMEM159       | 2. 547283 | 3. 714426 | 34. 88894 | 1. 24E-110 | 9. 69E-109 | 241. 0531 |
| ANKS4B        | 1. 631357 | 0. 877517 | 21. 9973  | 8. 64E-66  | 9. 49E-65  | 137. 6193 |
| CRYM          | 1. 282278 | 0. 73995  | 21. 26659 | 5. 21E-63  | 5. 31E-62  | 131. 212  |
| METTL9        | 1. 785861 | 4. 858456 | 28. 02469 | 7. 77E-88  | 1. 77E-86  | 188. 4559 |
| IGSF6         | 2. 157142 | 1. 46515  | 28. 71337 | 3. 07E-90  | 7. 93E-89  | 193. 998  |
| UQCRC2        | 1. 303844 | 6. 107117 | 19. 8544  | 1. 37E-57  | 1. 21E-56  | 118. 7249 |
| CDR2          | 1. 784008 | 3. 436102 | 29. 0614  | 1. 92E-91  | 5. 25E-90  | 196. 7764 |
| HS3ST2        | 1. 334807 | 0. 813364 | 18. 90977 | 6. 11E-54  | 4. 96E-53  | 110. 3156 |
| COG7          | 1. 137302 | 3. 551559 | 18. 53881 | 1. 67E-52  | 1. 31E-51  | 107. 0053 |
| UBFD1         | 1. 084997 | 3. 415848 | 19. 25025 | 2. 94E-55  | 2. 46E-54  | 113. 3505 |
| NDUFAB1       | 1. 374338 | 5. 634796 | 22. 13118 | 2. 69E-66  | 2. 99E-65  | 138. 7886 |
| PALB2         | 1. 593767 | 2. 196347 | 34. 03202 | 6. 31E-108 | 4. 17E-106 | 234. 8069 |
| DCTN5         | 1. 882116 | 4. 059853 | 30. 89064 | 1. 15E-97  | 4. 25E-96  | 211. 1314 |
| PLK1          | 2. 829544 | 2. 184355 | 40. 70421 | 5. 28E-128 | 1. 25E-125 | 281. 1425 |
| TD-2196E14. 1 | 1. 11506  | 0. 594579 | 16. 4444  | 2. 21E-44  | 1. 46E-43  | 88. 3066  |
| ERN2          | 4. 550508 | 2. 780475 | 34. 27523 | 1. 07E-108 | 7. 47E-107 | 236. 5888 |
| PRKCB         | 1. 175599 | 0. 808299 | 14. 98076 | 9. 62E-39  | 5. 66E-38  | 75. 33669 |
| ARHGAP17      | 1. 13185  | 4. 314494 | 18. 951   | 4. 23E-54  | 3. 44E-53  | 110. 6833 |



|              |          |          |          |           |           |          |
|--------------|----------|----------|----------|-----------|-----------|----------|
| AQP8         | -5.36405 | 4.637961 | -27.0141 | 2.89E-84  | 5.77E-83  | 180.2185 |
| NSMCE1       | 1.505722 | 5.26774  | 25.39656 | 1.94E-78  | 3.17E-77  | 166.7804 |
| IL4R         | 1.963427 | 4.508527 | 20.42928 | 8.38E-60  | 7.83E-59  | 123.8228 |
| IL21R        | 1.243128 | 0.68878  | 21.79341 | 5.13E-65  | 5.53E-64  | 135.8356 |
| XPO6         | 1.530916 | 4.906773 | 24.3953  | 9.12E-75  | 1.32E-73  | 158.3135 |
| EIF3CL       | 1.365298 | 5.069198 | 17.98704 | 2.31E-50  | 1.73E-49  | 102.077  |
| CLN3         | 1.44113  | 4.609307 | 23.65962 | 4.87E-72  | 6.40E-71  | 152.0242 |
| APOBR        | 2.182696 | 1.61643  | 32.80086 | 5.73E-104 | 3.01E-102 | 225.6746 |
| EIF3C        | 1.357588 | 7.821614 | 14.87523 | 2.44E-38  | 1.42E-37  | 74.40831 |
| RP11-24N18.1 | 1.596606 | 2.795432 | 9.828324 | 4.47E-20  | 1.79E-19  | 32.50225 |
| TUFM         | 1.235562 | 6.572873 | 18.38855 | 6.40E-52  | 4.95E-51  | 105.6636 |
| RABEP2       | 1.022749 | 3.684166 | 17.60775 | 6.84E-49  | 4.96E-48  | 98.68815 |
| CD19         | 1.163702 | 0.645328 | 11.27142 | 5.20E-25  | 2.30E-24  | 43.79986 |
| SPNS1        | 1.670618 | 4.146464 | 27.59067 | 2.62E-86  | 5.62E-85  | 184.9332 |
| LAT          | 1.129347 | 2.697414 | 12.62945 | 6.68E-30  | 3.28E-29  | 55.02045 |
| P11-426C22.  | 1.490163 | 0.881978 | 31.13391 | 1.77E-98  | 6.82E-97  | 213.0089 |
| P11-426C22.  | 1.070199 | 0.55759  | 23.28217 | 1.25E-70  | 1.58E-69  | 148.7761 |
| RP11-345J4.5 | 2.387102 | 3.593014 | 35.89087 | 9.50E-114 | 9.11E-112 | 248.2431 |
| RP11-345J4.6 | 1.466595 | 1.36472  | 7.921445 | 4.00E-14  | 1.39E-13  | 18.92459 |
| BOLA2        | 2.367589 | 2.773254 | 32.16933 | 6.60E-102 | 3.06E-100 | 220.917  |
| SLX1B        | 1.190967 | 2.623393 | 11.38514 | 2.06E-25  | 9.23E-25  | 44.71997 |
| SULT1A4      | 2.669591 | 2.703005 | 27.49947 | 5.49E-86  | 1.16E-84  | 184.19   |
| RP11-345J4.5 | 1.068749 | 0.649454 | 18.17466 | 4.32E-51  | 3.28E-50  | 103.7532 |
| RP11-345J4.4 | 1.214445 | 0.762619 | 19.15849 | 6.66E-55  | 5.54E-54  | 112.5329 |
| SPN          | 1.973706 | 1.292562 | 27.66511 | 1.43E-86  | 3.10E-85  | 185.539  |
| C16orf54     | 1.593978 | 0.917333 | 18.49338 | 2.51E-52  | 1.96E-51  | 106.5996 |
| KIF22        | 1.314335 | 4.114557 | 19.87741 | 1.11E-57  | 9.88E-57  | 118.9293 |
| AC009133.21  | 1.058    | 0.992191 | 15.73492 | 1.22E-41  | 7.59E-41  | 82.00073 |
| MAZ          | 1.658763 | 6.195535 | 23.77334 | 1.84E-72  | 2.46E-71  | 153      |
| PAGR1        | 1.088372 | 3.902175 | 18.84549 | 1.08E-53  | 8.74E-53  | 109.7422 |
| MVP          | 2.199923 | 6.479642 | 23.70349 | 3.35E-72  | 4.42E-71  | 152.4008 |
| CDIPT        | 1.199226 | 5.679546 | 17.36944 | 5.75E-48  | 4.09E-47  | 96.55931 |
| SEZ6L2       | 1.886767 | 4.086622 | 27.06402 | 1.92E-84  | 3.85E-83  | 180.6281 |
| ASPHD1       | 2.046912 | 3.363347 | 22.31074 | 5.62E-67  | 6.38E-66  | 140.3545 |
| KCTD13       | 1.190853 | 3.383886 | 19.4648  | 4.36E-56  | 3.72E-55  | 115.2608 |
| TMEM219      | 1.563706 | 6.598329 | 22.33491 | 4.56E-67  | 5.19E-66  | 140.5651 |
| ALDOA        | 2.435197 | 9.004988 | 23.71779 | 2.96E-72  | 3.92E-71  | 152.5235 |
| PPP4C        | 2.318249 | 5.444681 | 35.54915 | 1.08E-112 | 9.56E-111 | 245.8046 |
| TBX6         | 1.019145 | 1.834364 | 11.41599 | 1.61E-25  | 7.20E-25  | 44.97026 |
| GDPD3        | 2.076016 | 2.190091 | 23.8053  | 1.40E-72  | 1.88E-71  | 153.274  |
| MAPK3        | 2.762553 | 5.206501 | 37.99219 | 4.09E-120 | 5.76E-118 | 262.9339 |
| CORO1A       | 2.855231 | 3.698071 | 25.26659 | 5.78E-78  | 9.29E-77  | 165.6876 |
| BOLA2B       | 2.803573 | 5.35017  | 37.85921 | 1.02E-119 | 1.39E-117 | 262.0196 |
| SLX1A        | 1.067455 | 4.507741 | 11.96909 | 1.69E-27  | 7.94E-27  | 49.5039  |
| SULT1A3      | 1.34969  | 3.4664   | 14.1251  | 1.74E-35  | 9.58E-35  | 67.84635 |
| P11-347C12.  | 1.998379 | 1.330524 | 27.53214 | 4.21E-86  | 8.96E-85  | 184.4564 |
| P11-347C12.  | 1.234193 | 0.772029 | 19.4169  | 6.67E-56  | 5.67E-55  | 114.8345 |
| CD2BP2       | 1.584427 | 4.850067 | 25.61666 | 3.07E-79  | 5.15E-78  | 168.6267 |
| P11-347C12.1 | 1.231911 | 1.236066 | 28.40166 | 3.73E-89  | 9.09E-88  | 191.4968 |
| TBC1D10B     | 1.525109 | 3.978112 | 27.57412 | 2.99E-86  | 6.41E-85  | 184.7984 |
| ZNF48        | 1.053431 | 2.127171 | 25.73967 | 1.10E-79  | 1.86E-78  | 169.6562 |
| 1-Sep        | 1.733106 | 1.77001  | 18.62035 | 8.08E-53  | 6.38E-52  | 107.7332 |
| DCTPP1       | 2.093058 | 4.352309 | 33.26521 | 1.80E-105 | 1.03E-103 | 229.141  |
| SEPHS2       | 1.956471 | 4.507923 | 32.4035  | 1.13E-102 | 5.46E-101 | 222.6869 |

|              |           |           |           |            |            |           |
|--------------|-----------|-----------|-----------|------------|------------|-----------|
| ITGAL        | 1. 800996 | 1. 612106 | 19. 24078 | 3. 20E-55  | 2. 68E-54  | 113. 2661 |
| ZNF768       | 1. 419548 | 4. 056884 | 22. 66877 | 2. 51E-68  | 2. 96E-67  | 143. 4684 |
| ZNF688       | 1. 109376 | 3. 25359  | 21. 72227 | 9. 57E-65  | 1. 02E-63  | 135. 2125 |
| RP11-2C24. 9 | 1. 183745 | 2. 392977 | 24. 78844 | 3. 26E-76  | 4. 93E-75  | 161. 6511 |
| TMEM265      | 3. 216056 | 3. 80551  | 34. 78212 | 2. 68E-110 | 2. 04E-108 | 240. 2794 |
| PHKG2        | 1. 258033 | 4. 014683 | 20. 63331 | 1. 38E-60  | 1. 32E-59  | 125. 6275 |
| RNF40        | 1. 758923 | 4. 943613 | 29. 88094 | 2. 97E-94  | 9. 30E-93  | 203. 2595 |
| ZNF629       | 1. 370427 | 2. 299146 | 30. 08086 | 6. 21E-95  | 2. 01E-93  | 204. 8283 |
| BCL7C        | 2. 156804 | 3. 9089   | 36. 46627 | 1. 63E-115 | 1. 74E-113 | 252. 3178 |
| CTF1         | 1. 190536 | 1. 804634 | 19. 92768 | 7. 13E-58  | 6. 35E-57  | 119. 3757 |
| FBXL19       | 1. 491275 | 2. 646042 | 23. 80536 | 1. 40E-72  | 1. 88E-71  | 153. 2746 |
| ORAI3        | 1. 214823 | 3. 474475 | 20. 3192  | 2. 22E-59  | 2. 05E-58  | 122. 848  |
| HSD3B7       | 1. 454209 | 3. 963317 | 22. 43563 | 1. 90E-67  | 2. 19E-66  | 141. 442  |
| STX4         | 1. 593078 | 5. 105872 | 24. 52031 | 3. 16E-75  | 4. 63E-74  | 159. 3766 |
| ZNF668       | 1. 821047 | 2. 153457 | 36. 00683 | 4. 17E-114 | 4. 12E-112 | 249. 0675 |
| VKORC1       | 1. 123378 | 6. 196898 | 17. 12313 | 5. 19E-47  | 3. 62E-46  | 94. 35971 |
| P11-388M20.  | 1. 204418 | 1. 094019 | 7. 654743 | 2. 35E-13  | 7. 97E-13  | 17. 17541 |
| PRSS8        | 1. 598972 | 6. 069325 | 16. 47366 | 1. 71E-44  | 1. 13E-43  | 88. 56718 |
| PRSS36       | 1. 191543 | 1. 29699  | 26. 31268 | 9. 38E-82  | 1. 71E-80  | 174. 4286 |
| FUS          | 1. 335838 | 6. 831215 | 17. 20377 | 2. 53E-47  | 1. 77E-46  | 95. 07972 |
| PYCARD       | 3. 520642 | 4. 087784 | 43. 34713 | 2. 34E-135 | 1. 04E-132 | 298. 1125 |
| ITGAM        | 1. 928249 | 2. 051223 | 22. 42867 | 2. 02E-67  | 2. 32E-66  | 141. 3814 |
| ITGAX        | 2. 099615 | 2. 356154 | 20. 65147 | 1. 18E-60  | 1. 13E-59  | 125. 788  |
| TGFB1I1      | 2. 926143 | 3. 697416 | 32. 82905 | 4. 64E-104 | 2. 44E-102 | 225. 8858 |
| ZNF720       | 1. 427118 | 2. 642151 | 25. 78127 | 7. 77E-80  | 1. 33E-78  | 170. 0039 |
| ZNF267       | 2. 047592 | 2. 087667 | 41. 0928  | 4. 18E-129 | 1. 10E-126 | 283. 6845 |
| P11-1166P10. | 1. 290692 | 0. 742004 | 20. 56382 | 2. 55E-60  | 2. 42E-59  | 125. 0131 |
| UBE2MP1      | 1. 316776 | 0. 749473 | 36. 89581 | 8. 04E-117 | 9. 26E-115 | 255. 3338 |
| SHCBP1       | 1. 723263 | 1. 026353 | 36. 35862 | 3. 48E-115 | 3. 64E-113 | 251. 5584 |
| RP11-46D6. 1 | 1. 707826 | 2. 361746 | 27. 93061 | 1. 66E-87  | 3. 73E-86  | 187. 6942 |
| RAB43P1      | 1. 557505 | 1. 936969 | 21. 37328 | 2. 04E-63  | 2. 10E-62  | 132. 15   |
| VPS35        | 2. 065017 | 4. 188967 | 32. 48257 | 6. 23E-103 | 3. 08E-101 | 223. 283  |
| ORC6         | 1. 69178  | 1. 21278  | 32. 59476 | 2. 68E-103 | 1. 35E-101 | 224. 1274 |
| C16orf87     | 1. 529667 | 1. 667935 | 34. 01024 | 7. 40E-108 | 4. 87E-106 | 234. 647  |
| GPT2         | -2. 08884 | 4. 419976 | -19. 6984 | 5. 46E-57  | 4. 77E-56  | 117. 3391 |
| DNAJA2       | 1. 68913  | 4. 231674 | 27. 72886 | 8. 52E-87  | 1. 86E-85  | 186. 0573 |
| NETO2        | 1. 129884 | 1. 47576  | 14. 58515 | 3. 12E-37  | 1. 78E-36  | 71. 86263 |
| ITFG1        | 1. 857483 | 4. 53995  | 29. 86417 | 3. 39E-94  | 1. 06E-92  | 203. 1277 |
| SLAH1        | 1. 45684  | 3. 302771 | 26. 07739 | 6. 60E-81  | 1. 16E-79  | 172. 4735 |
| N4BP1        | 1. 892094 | 3. 276141 | 31. 52326 | 8. 95E-100 | 3. 67E-98  | 215. 9984 |
| ZNF423       | 1. 105945 | 1. 463748 | 16. 9865  | 1. 76E-46  | 1. 21E-45  | 93. 14017 |
| ADCY7        | 2. 058527 | 2. 092625 | 26. 66284 | 5. 20E-83  | 9. 89E-82  | 177. 3262 |
| BRD7         | 1. 378009 | 4. 805537 | 25. 0771  | 2. 85E-77  | 4. 46E-76  | 164. 091  |
| SNX20        | 1. 751771 | 1. 133126 | 25. 70548 | 1. 46E-79  | 2. 47E-78  | 169. 3702 |
| NOD2         | 1. 077478 | 0. 86801  | 11. 39197 | 1. 95E-25  | 8. 74E-25  | 44. 77538 |
| CYLD         | 1. 427633 | 2. 999524 | 24. 28447 | 2. 34E-74  | 3. 33E-73  | 157. 3696 |
| HNRNPA1P48   | 1. 069403 | 3. 379601 | 15. 4437  | 1. 61E-40  | 9. 81E-40  | 79. 42178 |
| TOX3         | 1. 946953 | 1. 920783 | 22. 02057 | 7. 05E-66  | 7. 76E-65  | 137. 8226 |
| CHD9         | 1. 147797 | 2. 734402 | 20. 57361 | 2. 34E-60  | 2. 22E-59  | 125. 0997 |
| AKTIP        | 1. 119396 | 3. 556328 | 20. 02519 | 3. 00E-58  | 2. 70E-57  | 120. 2413 |
| RPGRIP1L     | 1. 224797 | 1. 280639 | 29. 61711 | 2. 36E-93  | 7. 05E-92  | 201. 1817 |
| FTO          | 1. 456106 | 3. 542221 | 23. 22992 | 1. 96E-70  | 2. 47E-69  | 148. 3254 |
| CRNDE        | 1. 878519 | 2. 679904 | 20. 28301 | 3. 06E-59  | 2. 81E-58  | 122. 5274 |
| IRX5         | 1. 18709  | 0. 645309 | 22. 27934 | 7. 39E-67  | 8. 35E-66  | 140. 0808 |

|               |           |           |           |            |            |           |
|---------------|-----------|-----------|-----------|------------|------------|-----------|
| MMP2          | 3. 790212 | 5. 957388 | 29. 44752 | 9. 01E-93  | 2. 60E-91  | 199. 8413 |
| LPCAT2        | 2. 374265 | 2. 389689 | 34. 4234  | 3. 62E-109 | 2. 60E-107 | 237. 6709 |
| CES1          | 2. 718554 | 3. 626466 | 19. 6069  | 1. 23E-56  | 1. 07E-55  | 116. 5251 |
| AMFR          | 1. 792683 | 4. 897157 | 29. 18956 | 6. 94E-92  | 1. 94E-90  | 197. 7958 |
| NUDT21        | 1. 435125 | 4. 479485 | 20. 73289 | 5. 73E-61  | 5. 53E-60  | 126. 5074 |
| OGFOD1        | 1. 805705 | 3. 14379  | 28. 68779 | 3. 77E-90  | 9. 69E-89  | 193. 7932 |
| BBS2          | 1. 16225  | 3. 818964 | 18. 96748 | 3. 65E-54  | 2. 98E-53  | 110. 8302 |
| MT2A          | 1. 202849 | 7. 901333 | 7. 683251 | 1. 95E-13  | 6. 62E-13  | 17. 36043 |
| MT1G          | -1. 86043 | 7. 040686 | -9. 16541 | 6. 34E-18  | 2. 41E-17  | 27. 58551 |
| MT1H          | -1. 78791 | 3. 826674 | -9. 35232 | 1. 60E-18  | 6. 16E-18  | 28. 95227 |
| MT1X          | -1. 01804 | 8. 19748  | -6. 35022 | 7. 44E-10  | 2. 26E-09  | 9. 245963 |
| NUP93         | 1. 869315 | 3. 846427 | 33. 42837 | 5. 38E-106 | 3. 19E-104 | 230. 3527 |
| RP11-325K4. 3 | -1. 5725  | 1. 46134  | -29. 5138 | 5. 34E-93  | 1. 57E-91  | 200. 3652 |
| RP11-325K4. 2 | -1. 88324 | 2. 120062 | -29. 7416 | 8. 88E-94  | 2. 71E-92  | 202. 1634 |
| NLRC5         | 2. 086915 | 3. 073318 | 24. 44002 | 6. 24E-75  | 9. 06E-74  | 158. 694  |
| CPNE2         | 1. 970229 | 3. 541895 | 27. 79531 | 4. 97E-87  | 1. 10E-85  | 186. 597  |
| FAM192A       | 1. 272541 | 5. 171996 | 20. 10589 | 1. 47E-58  | 1. 33E-57  | 120. 9572 |
| RSPRY1        | 1. 00576  | 3. 418567 | 17. 65915 | 4. 32E-49  | 3. 14E-48  | 99. 14738 |
| ARL2BP        | 1. 854021 | 4. 159339 | 31. 19335 | 1. 12E-98  | 4. 35E-97  | 213. 4665 |
| PLLP          | 1. 13032  | 4. 671825 | 10. 87007 | 1. 32E-23  | 5. 67E-23  | 40. 58468 |
| CCL22         | 1. 97813  | 0. 990214 | 24. 98418 | 6. 23E-77  | 9. 65E-76  | 163. 3066 |
| CX3CL1        | 2. 332304 | 3. 463872 | 23. 77001 | 1. 89E-72  | 2. 53E-71  | 152. 9715 |
| CCL17         | 2. 931616 | 1. 487996 | 22. 5483  | 7. 13E-68  | 8. 30E-67  | 142. 4219 |
| CIAPIN1       | 1. 361138 | 4. 188459 | 16. 22131 | 1. 62E-43  | 1. 05E-42  | 86. 32084 |
| POLR2C        | 1. 182525 | 4. 723098 | 20. 10953 | 1. 42E-58  | 1. 29E-57  | 120. 9896 |
| DOK4          | 2. 415693 | 4. 050801 | 32. 85458 | 3. 83E-104 | 2. 03E-102 | 226. 077  |
| CCDC102A      | 1. 406456 | 2. 20512  | 25. 29937 | 4. 39E-78  | 7. 08E-77  | 165. 9634 |
| ADGRG1        | 1. 975288 | 5. 456883 | 23. 79518 | 1. 53E-72  | 2. 04E-71  | 153. 1873 |
| KATNB1        | 1. 053805 | 3. 341783 | 20. 12737 | 1. 21E-58  | 1. 10E-57  | 121. 1478 |
| USB1          | 1. 810313 | 3. 944876 | 31. 24806 | 7. 35E-99  | 2. 89E-97  | 213. 8874 |
| MMP15         | 1. 787415 | 3. 727691 | 22. 67371 | 2. 40E-68  | 2. 84E-67  | 143. 5113 |
| CFAP20        | 1. 907525 | 3. 764034 | 33. 93776 | 1. 26E-107 | 8. 17E-106 | 234. 1144 |
| GINS3         | 1. 166882 | 1. 261371 | 28. 54981 | 1. 14E-89  | 2. 84E-88  | 192. 6871 |
| CNOT1         | 1. 283759 | 5. 850684 | 23. 00592 | 1. 35E-69  | 1. 66E-68  | 146. 3901 |
| SLC38A7       | 1. 236983 | 2. 307881 | 25. 11009 | 2. 16E-77  | 3. 40E-76  | 164. 3692 |
| GOT2          | 1. 657228 | 4. 511943 | 30. 53656 | 1. 78E-96  | 6. 20E-95  | 208. 3855 |
| RP11-5106. 1  | 1. 532358 | 4. 523362 | 23. 05413 | 8. 93E-70  | 1. 10E-68  | 146. 8071 |
| CDH11         | 4. 221633 | 3. 006286 | 37. 12007 | 1. 68E-117 | 2. 02E-115 | 256. 8999 |
| CDH5          | 1. 686649 | 2. 702459 | 21. 74234 | 8. 03E-65  | 8. 58E-64  | 135. 3884 |
| LINC00920     | 1. 363175 | 0. 734485 | 26. 37396 | 5. 64E-82  | 1. 03E-80  | 174. 9367 |
| BEAN1         | 2. 182498 | 1. 443268 | 24. 86145 | 1. 76E-76  | 2. 69E-75  | 162. 2691 |
| TK2           | 1. 235216 | 3. 986219 | 19. 51278 | 2. 84E-56  | 2. 44E-55  | 115. 6878 |
| CKLF          | 3. 724166 | 4. 725972 | 47. 73125 | 7. 13E-147 | 7. 57E-144 | 324. 6959 |
| CKLF-CMTM1    | 1. 664124 | 1. 213736 | 28. 64533 | 5. 30E-90  | 1. 35E-88  | 193. 453  |
| P11-403P17.   | 1. 459367 | 2. 142975 | 18. 13915 | 5. 93E-51  | 4. 48E-50  | 103. 4359 |
| CMTM1         | 1. 435417 | 0. 988563 | 25. 99149 | 1. 35E-80  | 2. 35E-79  | 171. 7582 |
| CMTM3         | 3. 95548  | 3. 752081 | 40. 97389 | 9. 06E-129 | 2. 32E-126 | 282. 9084 |
| RRAD          | 2. 08017  | 1. 987277 | 20. 07314 | 1. 96E-58  | 1. 77E-57  | 120. 6668 |
| FAM96B        | 2. 114508 | 5. 838766 | 31. 39737 | 2. 34E-99  | 9. 43E-98  | 215. 0338 |
| CES2          | 1. 686648 | 3. 800486 | 20. 92865 | 1. 02E-61  | 1. 00E-60  | 128. 2353 |
| P11-361L15.   | 1. 755996 | 2. 976051 | 15. 29355 | 6. 08E-40  | 3. 67E-39  | 78. 09468 |
| CBFB          | 2. 116009 | 3. 774034 | 32. 18825 | 5. 72E-102 | 2. 67E-100 | 221. 0603 |
| C16orf70      | 1. 184643 | 2. 648062 | 23. 80094 | 1. 45E-72  | 1. 95E-71  | 153. 2366 |
| B3GNT9        | 2. 144243 | 2. 204369 | 34. 03229 | 6. 30E-108 | 4. 17E-106 | 234. 8089 |

|              |           |           |           |            |            |           |
|--------------|-----------|-----------|-----------|------------|------------|-----------|
| TRADD        | 1. 658979 | 4. 001335 | 23. 9258  | 4. 99E-73  | 6. 77E-72  | 154. 3062 |
| FBXL8        | -1. 16398 | 3. 828022 | -13. 5703 | 2. 15E-33  | 1. 13E-32  | 63. 04278 |
| RP11-5A19. 5 | -1. 7925  | 2. 23219  | -22. 8361 | 5. 88E-69  | 7. 08E-68  | 144. 9193 |
| HSF4         | -1. 0481  | 5. 126285 | -9. 27218 | 2. 89E-18  | 1. 11E-17  | 28. 36433 |
| TMEM208      | 1. 58172  | 5. 477417 | 25. 34881 | 2. 90E-78  | 4. 70E-77  | 166. 3791 |
| TPPP3        | 2. 629396 | 4. 064514 | 23. 56096 | 1. 14E-71  | 1. 48E-70  | 151. 1765 |
| HSD11B2      | 2. 248312 | 3. 256739 | 20. 20922 | 5. 88E-59  | 5. 37E-58  | 121. 8735 |
| ATP6VOD1     | 2. 008459 | 5. 331093 | 31. 23591 | 8. 07E-99  | 3. 16E-97  | 213. 794  |
| FAM65A       | 1. 052867 | 4. 660836 | 14. 86481 | 2. 67E-38  | 1. 56E-37  | 74. 3167  |
| CTCF         | 1. 443223 | 3. 565173 | 27. 90835 | 1. 99E-87  | 4. 46E-86  | 187. 5138 |
| RLTPR        | 1. 041202 | 1. 199709 | 12. 96889 | 3. 74E-31  | 1. 89E-30  | 57. 89466 |
| ACD          | 1. 004817 | 3. 710986 | 16. 41995 | 2. 75E-44  | 1. 81E-43  | 88. 08879 |
| GFOD2        | 1. 441175 | 2. 931374 | 29. 30749 | 2. 73E-92  | 7. 73E-91  | 198. 732  |
| THAP11       | 1. 204079 | 3. 573078 | 23. 48379 | 2. 20E-71  | 2. 84E-70  | 150. 5129 |
| NUTF2        | 1. 742747 | 5. 696428 | 25. 86276 | 3. 94E-80  | 6. 77E-79  | 170. 6845 |
| CTRL         | -6. 4924  | 6. 506508 | -24. 1049 | 1. 08E-73  | 1. 50E-72  | 155. 8376 |
| PSMB10       | 1. 416523 | 6. 27594  | 18. 71812 | 3. 38E-53  | 2. 69E-52  | 108. 6058 |
| DPEP2        | 1. 714316 | 1. 33745  | 22. 75779 | 1. 16E-68  | 1. 38E-67  | 144. 2408 |
| DUS2         | 1. 560118 | 2. 389722 | 33. 97832 | 9. 36E-108 | 6. 11E-106 | 234. 4125 |
| DDX28        | 1. 26579  | 2. 201508 | 28. 71971 | 2. 92E-90  | 7. 55E-89  | 194. 0488 |
| NFATC3       | 1. 25162  | 2. 104745 | 21. 86418 | 2. 76E-65  | 3. 00E-64  | 136. 4551 |
| PLA2G15      | 1. 957625 | 2. 992514 | 32. 05968 | 1. 51E-101 | 6. 86E-100 | 220. 0859 |
| SMPD3        | 1. 816866 | 1. 95949  | 19. 35486 | 1. 16E-55  | 9. 78E-55  | 114. 2822 |
| ZFP90        | 1. 036342 | 2. 579678 | 19. 39478 | 8. 12E-56  | 6. 89E-55  | 114. 6376 |
| CDH3         | 4. 996914 | 3. 006389 | 47. 58704 | 1. 66E-146 | 1. 70E-143 | 323. 8509 |
| CDH1         | 1. 631715 | 5. 874426 | 19. 50793 | 2. 97E-56  | 2. 55E-55  | 115. 6446 |
| TANGO6       | 1. 013881 | 1. 752688 | 25. 4657  | 1. 09E-78  | 1. 79E-77  | 167. 3609 |
| HAS3         | 1. 447441 | 1. 261616 | 15. 53704 | 7. 05E-41  | 4. 32E-40  | 80. 24762 |
| CHTF8        | 1. 523019 | 5. 088119 | 25. 36139 | 2. 61E-78  | 4. 24E-77  | 166. 4849 |
| CIRH1A       | 1. 048642 | 3. 873597 | 17. 80775 | 1. 15E-49  | 8. 45E-49  | 100. 4751 |
| SNTB2        | 1. 1008   | 1. 890324 | 22. 27667 | 7. 56E-67  | 8. 54E-66  | 140. 0576 |
| P11-343C2. 1 | 1. 808898 | 2. 463601 | 30. 49709 | 2. 42E-96  | 8. 37E-95  | 208. 0784 |
| NIP7         | 1. 792268 | 3. 209519 | 29. 46126 | 8. 08E-93  | 2. 34E-91  | 199. 95   |
| TMED6        | -3. 10939 | 3. 919148 | -21. 4801 | 7. 99E-64  | 8. 31E-63  | 133. 0885 |
| TERF2        | 1. 291714 | 3. 340491 | 24. 96042 | 7. 62E-77  | 1. 18E-75  | 163. 1058 |
| CYB5B        | 2. 578294 | 4. 752614 | 39. 2066  | 1. 08E-123 | 1. 89E-121 | 271. 19   |
| P11-311C24.  | 1. 162672 | 3. 784423 | 17. 15384 | 3. 95E-47  | 2. 76E-46  | 94. 63393 |
| NQO1         | 5. 784598 | 4. 802985 | 59. 31773 | 8. 44E-174 | 7. 30E-170 | 386. 8508 |
| DDX19B       | 1. 409271 | 3. 984894 | 23. 76344 | 2. 00E-72  | 2. 67E-71  | 152. 9152 |
| DDX19A       | 1. 169775 | 3. 622513 | 22. 12087 | 2. 94E-66  | 3. 27E-65  | 138. 6986 |
| ST3GAL2      | 1. 816627 | 2. 318344 | 28. 63148 | 5. 92E-90  | 1. 51E-88  | 193. 3421 |
| COG4         | 1. 78475  | 4. 122498 | 28. 88426 | 7. 86E-91  | 2. 09E-89  | 195. 3641 |
| SF3B3        | 1. 574459 | 5. 908473 | 21. 88557 | 2. 29E-65  | 2. 49E-64  | 136. 6422 |
| IL34         | 1. 505155 | 1. 590295 | 21. 51225 | 6. 02E-64  | 6. 29E-63  | 133. 3706 |
| MTSS1L       | 1. 684116 | 3. 219312 | 20. 54384 | 3. 04E-60  | 2. 88E-59  | 124. 8364 |
| VAC14        | 1. 693026 | 3. 949207 | 29. 43741 | 9. 76E-93  | 2. 82E-91  | 199. 7613 |
| CALB2        | 2. 955459 | 1. 722325 | 23. 98542 | 3. 00E-73  | 4. 11E-72  | 154. 8164 |
| CHST4        | 1. 95069  | 2. 480982 | 16. 64392 | 3. 74E-45  | 2. 51E-44  | 90. 08441 |
| IST1         | 1. 438474 | 6. 009816 | 20. 63725 | 1. 33E-60  | 1. 27E-59  | 125. 6623 |
| P11-417N10.  | 1. 124472 | 1. 469443 | 17. 02262 | 1. 27E-46  | 8. 82E-46  | 93. 46255 |
| ZNF821       | 1. 075061 | 1. 96475  | 20. 76619 | 4. 27E-61  | 4. 14E-60  | 126. 8015 |
| DHX38        | 1. 00514  | 4. 420702 | 16. 38706 | 3. 69E-44  | 2. 42E-43  | 87. 79601 |
| PSMD7        | 1. 757334 | 5. 155519 | 27. 93594 | 1. 59E-87  | 3. 58E-86  | 187. 7374 |
| GLG1         | 1. 194872 | 5. 191964 | 18. 46055 | 3. 36E-52  | 2. 62E-51  | 106. 3066 |

|              |          |          |          |           |           |          |
|--------------|----------|----------|----------|-----------|-----------|----------|
| RFWD3        | 1.066267 | 2.43419  | 17.54134 | 1.24E-48  | 8.92E-48  | 98.09487 |
| MLKL         | 1.26178  | 3.194255 | 22.44519 | 1.75E-67  | 2.01E-66  | 141.5251 |
| FA2H         | 2.933528 | 3.182913 | 30.07685 | 6.41E-95  | 2.07E-93  | 204.7969 |
| ZNRF1        | 1.856652 | 3.537596 | 28.59926 | 7.66E-90  | 1.93E-88  | 193.0837 |
| ZFP1         | 1.366223 | 1.51355  | 28.04818 | 6.43E-88  | 1.47E-86  | 188.6459 |
| CTRB2        | -7.98409 | 10.9407  | -19.3677 | 1.03E-55  | 8.73E-55  | 114.3965 |
| CTRB1        | -8.1267  | 10.70579 | -19.9318 | 6.87E-58  | 6.12E-57  | 119.4127 |
| RP11-331F4.4 | -8.76704 | 7.187469 | -35.9334 | 7.02E-114 | 6.81E-112 | 248.5455 |
| BCAR1        | 1.702988 | 4.914546 | 21.32633 | 3.08E-63  | 3.16E-62  | 131.7374 |
| CFDP1        | 1.798376 | 5.142318 | 28.58679 | 8.46E-90  | 2.13E-88  | 192.9837 |
| TMEM170A     | 1.187942 | 2.536301 | 23.00832 | 1.33E-69  | 1.62E-68  | 146.4109 |
| GABARAPL2    | 1.830137 | 5.849295 | 28.92101 | 5.87E-91  | 1.57E-89  | 195.6575 |
| ADAT1        | 1.62282  | 3.497352 | 30.6465  | 7.60E-97  | 2.70E-95  | 209.2398 |
| KARS         | 1.44068  | 5.72891  | 22.11263 | 3.16E-66  | 3.51E-65  | 138.6266 |
| TERF2IP      | 1.579734 | 4.657156 | 25.22602 | 8.13E-78  | 1.30E-76  | 165.3461 |
| WWOX         | 1.102564 | 2.399546 | 23.81703 | 1.27E-72  | 1.70E-71  | 153.3746 |
| MAF          | 2.086468 | 2.143729 | 29.52747 | 4.79E-93  | 1.41E-91  | 200.4737 |
| CDYL2        | 1.031325 | 0.984754 | 22.34166 | 4.30E-67  | 4.90E-66  | 140.6239 |
| CMC2         | 1.650939 | 4.913101 | 28.65915 | 4.74E-90  | 1.21E-88  | 193.5638 |
| CENPN        | 1.983757 | 2.112358 | 32.41092 | 1.07E-102 | 5.18E-101 | 222.7429 |
| P11-303E16.  | 1.592766 | 1.533579 | 32.44925 | 8.00E-103 | 3.92E-101 | 223.0319 |
| ATMIN        | 1.147174 | 3.34209  | 21.52092 | 5.58E-64  | 5.83E-63  | 133.4468 |
| BCO1         | 1.303424 | 0.704281 | 24.48214 | 4.36E-75  | 6.37E-74  | 159.0521 |
| CMIP         | 2.401079 | 3.924005 | 32.01429 | 2.13E-101 | 9.64E-100 | 219.7414 |
| PLCG2        | 1.554363 | 2.506308 | 20.94062 | 9.17E-62  | 9.02E-61  | 128.3408 |
| HSD17B2      | 2.41993  | 4.260942 | 18.23559 | 2.51E-51  | 1.91E-50  | 104.2974 |
| MPHOSPH6     | 1.92739  | 3.14851  | 31.46321 | 1.42E-99  | 5.77E-98  | 215.5385 |
| CDH13        | 1.975639 | 1.271462 | 27.59642 | 2.50E-86  | 5.36E-85  | 184.98   |
| HSBP1        | 2.364009 | 5.256428 | 36.06539 | 2.76E-114 | 2.76E-112 | 249.4832 |
| MBTPS1       | 1.176605 | 4.796192 | 19.80199 | 2.18E-57  | 1.92E-56  | 118.2594 |
| HSDL1        | 1.14454  | 2.536563 | 25.20766 | 9.49E-78  | 1.51E-76  | 165.1915 |
| WFDC1        | 1.860724 | 1.317018 | 23.1277  | 4.73E-70  | 5.88E-69  | 147.4429 |
| ATP2C2       | 2.535096 | 1.985247 | 26.26709 | 1.37E-81  | 2.47E-80  | 174.0504 |
| TLDC1        | 1.843477 | 2.30298  | 21.35449 | 2.41E-63  | 2.47E-62  | 131.9849 |
| COTL1        | 3.949014 | 5.234294 | 47.78923 | 5.08E-147 | 5.59E-144 | 325.0351 |
| USP10        | 1.696378 | 3.935866 | 30.74952 | 3.42E-97  | 1.23E-95  | 210.0389 |
| CRISPLD2     | 2.67015  | 4.132855 | 23.15763 | 3.65E-70  | 4.56E-69  | 147.7014 |
| ZDHHC7       | 1.823551 | 4.515755 | 24.04057 | 1.87E-73  | 2.58E-72  | 155.2879 |
| GINS2        | 1.577779 | 1.160176 | 31.12527 | 1.89E-98  | 7.27E-97  | 212.9424 |
| C16orf74     | 2.175865 | 1.534962 | 20.66975 | 1.00E-60  | 9.59E-60  | 125.9495 |
| EMC8         | 1.483197 | 3.561595 | 29.94837 | 1.75E-94  | 5.55E-93  | 203.7893 |
| COX4I1       | 1.771682 | 8.355975 | 22.45552 | 1.60E-67  | 1.84E-66  | 141.6151 |
| IRF8         | 2.666209 | 2.390997 | 28.45494 | 2.43E-89  | 5.98E-88  | 191.9252 |
| FENDRR       | 1.051783 | 0.795181 | 14.30049 | 3.77E-36  | 2.10E-35  | 69.37426 |
| FOXF1        | 1.752026 | 1.407091 | 26.47538 | 2.44E-82  | 4.53E-81  | 175.7767 |
| FOXC2        | 1.338409 | 0.723107 | 16.52789 | 1.05E-44  | 6.99E-44  | 89.05031 |
| FOXL1        | 3.120423 | 1.575381 | 33.25521 | 1.94E-105 | 1.11E-103 | 229.0667 |
| CTD-2015G9.2 | 1.529668 | 0.743618 | 18.95948 | 3.92E-54  | 3.19E-53  | 110.7589 |
| C16orf95     | 1.307216 | 1.983835 | 27.74821 | 7.28E-87  | 1.60E-85  | 186.2145 |
| MAP1LC3B     | 2.021843 | 4.584636 | 29.32581 | 2.36E-92  | 6.71E-91  | 198.8773 |
| SLC7A5       | 2.597019 | 2.81587  | 21.66392 | 1.59E-64  | 1.69E-63  | 134.7012 |
| P11-863P13.  | 1.732855 | 0.869923 | 26.2752  | 1.28E-81  | 2.31E-80  | 174.1176 |
| ZNF469       | 1.503012 | 0.833823 | 26.03156 | 9.66E-81  | 1.69E-79  | 172.092  |
| ZC3H18       | 1.098186 | 3.722086 | 19.4573  | 4.66E-56  | 3.98E-55  | 115.1941 |

|              |          |          |          |           |           |          |
|--------------|----------|----------|----------|-----------|-----------|----------|
| CYBA         | 3.362563 | 6.839025 | 31.74611 | 1.64E-100 | 7.03E-99  | 217.7008 |
| MVD          | 1.459658 | 4.479305 | 18.60029 | 9.66E-53  | 7.62E-52  | 107.5541 |
| PIEZ01       | 2.802741 | 5.213242 | 29.97571 | 1.41E-94  | 4.50E-93  | 204.0039 |
| CDT1         | 2.028316 | 1.322311 | 29.79285 | 5.93E-94  | 1.83E-92  | 202.5668 |
| APRT         | 1.256568 | 6.623918 | 16.60671 | 5.21E-45  | 3.49E-44  | 89.75269 |
| GALNS        | 1.694066 | 3.408182 | 23.52165 | 1.59E-71  | 2.06E-70  | 150.8386 |
| TRAPPC2L     | 1.857031 | 5.362663 | 29.03802 | 2.31E-91  | 6.29E-90  | 196.5903 |
| CBFA2T3      | -1.86894 | 2.721589 | -24.6124 | 1.45E-75  | 2.14E-74  | 160.1587 |
| ACSF3        | 1.059411 | 3.7053   | 18.68945 | 4.36E-53  | 3.46E-52  | 108.3499 |
| SLC22A31     | -2.36687 | 1.804586 | -13.9701 | 6.72E-35  | 3.65E-34  | 66.4998  |
| ANKRD11      | 1.071497 | 4.42914  | 17.25638 | 1.58E-47  | 1.11E-46  | 95.54954 |
| CPNE7        | 2.146051 | 1.750276 | 24.44177 | 6.15E-75  | 8.93E-74  | 158.7089 |
| DPEP1        | -2.5907  | 5.483397 | -21.6928 | 1.24E-64  | 1.32E-63  | 134.9539 |
| CHMP1A       | 1.969624 | 5.158275 | 29.62176 | 2.28E-93  | 6.80E-92  | 201.2183 |
| SPATA33      | 1.168362 | 2.302126 | 23.65948 | 4.88E-72  | 6.40E-71  | 152.023  |
| VPS9D1       | 1.269917 | 3.183248 | 19.12395 | 9.06E-55  | 7.51E-54  | 112.2252 |
| FANCA        | 2.20054  | 2.270566 | 31.73811 | 1.74E-100 | 7.45E-99  | 217.6399 |
| SPIRE2       | 2.000786 | 2.392261 | 20.64196 | 1.28E-60  | 1.22E-59  | 125.704  |
| P11-566K11.  | 1.259715 | 1.19957  | 21.51612 | 5.82E-64  | 6.08E-63  | 133.4046 |
| TUBB3        | 4.298203 | 3.004039 | 41.74808 | 6.02E-131 | 1.85E-128 | 287.934  |
| FAM101B      | 1.731435 | 1.989362 | 24.21003 | 4.41E-74  | 6.22E-73  | 156.735  |
| FAM57A       | 1.828243 | 2.950902 | 29.41146 | 1.20E-92  | 3.45E-91  | 199.5559 |
| GLOD4        | 1.385554 | 4.577386 | 24.31443 | 1.81E-74  | 2.59E-73  | 157.6249 |
| ABR          | 1.988237 | 4.271591 | 26.61707 | 7.58E-83  | 1.43E-81  | 176.9482 |
| YWHAE        | 1.685823 | 7.30752  | 22.11103 | 3.20E-66  | 3.56E-65  | 138.6127 |
| CRK          | 1.304288 | 3.641561 | 23.69342 | 3.65E-72  | 4.82E-71  | 152.3144 |
| PITPNA       | 1.139825 | 4.225397 | 19.09215 | 1.20E-54  | 9.93E-54  | 111.9417 |
| SLC43A2      | 2.014776 | 2.803174 | 28.57989 | 8.94E-90  | 2.24E-88  | 192.9284 |
| PRPF8        | 1.117744 | 5.758057 | 16.02512 | 9.25E-43  | 5.90E-42  | 84.57656 |
| TLCD2        | 1.395064 | 1.207148 | 29.74104 | 8.92E-94  | 2.72E-92  | 202.1588 |
| MIR22HG      | 1.08876  | 3.276406 | 11.83598 | 5.10E-27  | 2.37E-26  | 48.40511 |
| WDR81        | 1.071319 | 3.179927 | 16.39831 | 3.34E-44  | 2.19E-43  | 87.89612 |
| SERPINF1     | 2.001879 | 6.832609 | 17.55252 | 1.12E-48  | 8.08E-48  | 98.19479 |
| RPA1         | 1.287997 | 4.007188 | 21.25768 | 5.63E-63  | 5.73E-62  | 131.1336 |
| OVCA2        | 1.207666 | 4.070236 | 18.98895 | 3.02E-54  | 2.46E-53  | 111.0217 |
| P11-667K14.  | 2.513999 | 1.284539 | 25.5617  | 4.87E-79  | 8.10E-78  | 168.1662 |
| HIC1         | 1.856054 | 2.119943 | 22.34593 | 4.14E-67  | 4.72E-66  | 140.661  |
| SMG6         | 1.464535 | 3.353492 | 25.48918 | 8.94E-79  | 1.47E-77  | 167.558  |
| PAFAH1B1     | 1.252038 | 4.457834 | 21.03462 | 4.01E-62  | 3.98E-61  | 129.1696 |
| TAX1BP3      | 2.476032 | 5.999531 | 30.95742 | 6.88E-98  | 2.57E-96  | 211.6475 |
| P2RX5        | 1.302277 | 1.107124 | 11.96061 | 1.82E-27  | 8.51E-27  | 49.4337  |
| ITGAE        | 1.324891 | 3.684032 | 22.67674 | 2.34E-68  | 2.76E-67  | 143.5376 |
| P2RX1        | -3.10322 | 3.120882 | -32.6857 | 1.36E-103 | 7.02E-102 | 224.8106 |
| CYB5D2       | 1.175005 | 3.224777 | 21.3103  | 3.55E-63  | 3.63E-62  | 131.5964 |
| RP11-810M2.2 | 1.675747 | 3.042204 | 22.61222 | 4.09E-68  | 4.80E-67  | 142.9774 |
| SPNS3        | 1.200091 | 0.904336 | 25.83747 | 4.86E-80  | 8.34E-79  | 170.4733 |
| SPNS2        | 1.643377 | 3.950967 | 16.36681 | 4.42E-44  | 2.90E-43  | 87.61566 |
| ARRB2        | 1.61023  | 4.198981 | 20.26558 | 3.57E-59  | 3.28E-58  | 122.3729 |
| CXCL16       | 3.490027 | 4.683783 | 43.72452 | 2.22E-136 | 1.05E-133 | 300.4759 |
| ZMYND15      | 1.325699 | 1.49213  | 24.21133 | 4.36E-74  | 6.16E-73  | 156.7461 |
| TM4SF5       | 3.966783 | 2.211437 | 29.84332 | 3.99E-94  | 1.24E-92  | 202.9638 |
| VMO1         | 2.167966 | 1.635243 | 30.95265 | 7.13E-98  | 2.67E-96  | 211.6107 |
| PSMB6        | 1.804678 | 5.90295  | 28.87182 | 8.68E-91  | 2.30E-89  | 195.2648 |
| SLC25A11     | 1.554378 | 4.303674 | 27.63384 | 1.84E-86  | 3.99E-85  | 185.2846 |

|              |          |          |          |           |           |          |
|--------------|----------|----------|----------|-----------|-----------|----------|
| PFN1         | 2.718326 | 7.718661 | 33.01753 | 1.14E-104 | 6.23E-103 | 227.2953 |
| SPAG7        | 1.404279 | 4.928933 | 24.498   | 3.81E-75  | 5.58E-74  | 159.187  |
| SCIMP        | 1.497254 | 1.096283 | 19.65034 | 8.37E-57  | 7.28E-56  | 116.9114 |
| NUP88        | 1.109707 | 4.423171 | 17.11632 | 5.52E-47  | 3.85E-46  | 94.29892 |
| CIQBP        | 1.331369 | 5.425649 | 19.90697 | 8.57E-58  | 7.62E-57  | 119.1919 |
| NLRP1        | 1.896295 | 3.216771 | 19.38997 | 8.48E-56  | 7.19E-55  | 114.5948 |
| FAM64A       | 1.800116 | 0.966004 | 36.26737 | 6.61E-115 | 6.83E-113 | 250.9138 |
| TXNDC17      | 1.903583 | 5.991471 | 27.17636 | 7.67E-85  | 1.55E-83  | 181.5492 |
| MED31        | 1.143433 | 2.753536 | 22.45178 | 1.65E-67  | 1.90E-66  | 141.5825 |
| SLC13A5      | 1.94603  | 1.057703 | 14.71383 | 1.01E-37  | 5.82E-37  | 72.99076 |
| XAF1         | 2.395582 | 3.373437 | 19.8796  | 1.09E-57  | 9.69E-57  | 118.9488 |
| P11-609D21.  | 1.359136 | 0.920105 | 16.48387 | 1.56E-44  | 1.03E-43  | 88.65817 |
| RNASEK       | 1.675466 | 7.284593 | 21.95094 | 1.30E-65  | 1.42E-64  | 137.214  |
| C17orf49     | 1.886027 | 5.407516 | 28.14037 | 3.06E-88  | 7.11E-87  | 189.3909 |
| BCL6B        | 1.747279 | 1.837415 | 23.18809 | 2.81E-70  | 3.52E-69  | 147.9644 |
| SLC16A13     | 1.277561 | 1.287617 | 25.32589 | 3.51E-78  | 5.69E-77  | 166.1865 |
| CLEC10A      | 1.571797 | 1.359848 | 16.03064 | 8.81E-43  | 5.62E-42  | 84.62559 |
| ASGR1        | 1.138074 | 0.987907 | 20.31064 | 2.39E-59  | 2.21E-58  | 122.7722 |
| DLG4         | 1.149347 | 2.778678 | 14.2125  | 8.13E-36  | 4.49E-35  | 68.60717 |
| PHF23        | 1.977516 | 3.659015 | 35.51028 | 1.43E-112 | 1.25E-110 | 245.5263 |
| GABARAP      | 1.117774 | 8.619745 | 13.08536 | 1.38E-31  | 7.05E-31  | 58.8864  |
| CTDNEP1      | 1.177754 | 5.9384   | 18.1587  | 4.98E-51  | 3.77E-50  | 103.6106 |
| ELP5         | 1.235329 | 4.023025 | 19.25309 | 2.87E-55  | 2.40E-54  | 113.3758 |
| CLDN7        | 1.639062 | 6.168527 | 18.15106 | 5.33E-51  | 4.04E-50  | 103.5424 |
| EIF5A        | 1.469452 | 7.417697 | 19.33329 | 1.40E-55  | 1.18E-54  | 114.0901 |
| ACAP1        | 1.769039 | 2.395582 | 19.63334 | 9.74E-57  | 8.45E-56  | 116.7603 |
| KCTD11       | 1.938008 | 2.905512 | 31.40119 | 2.27E-99  | 9.16E-98  | 215.0631 |
| MEM256-PLSCF | 1.95457  | 4.045587 | 28.2762  | 1.02E-88  | 2.44E-87  | 190.4867 |
| NLGN2        | 1.124083 | 2.701337 | 14.40698 | 1.49E-36  | 8.35E-36  | 70.30399 |
| TMEM102      | 1.461011 | 2.289369 | 27.39295 | 1.31E-85  | 2.73E-84  | 183.3208 |
| FGF11        | 1.249237 | 1.092184 | 20.42694 | 8.55E-60  | 7.99E-59  | 123.8021 |
| ZBTB4        | 1.026102 | 3.719928 | 16.68496 | 2.59E-45  | 1.75E-44  | 90.45029 |
| TNFSF12      | 1.399329 | 4.412355 | 20.19004 | 6.96E-59  | 6.35E-58  | 121.7034 |
| FSF12-TNFSF  | 1.257761 | 0.785537 | 14.41102 | 1.43E-36  | 8.06E-36  | 70.33923 |
| TNFSF13      | 2.074764 | 4.584099 | 29.83513 | 4.26E-94  | 1.32E-92  | 202.8994 |
| SENP3        | 1.158213 | 4.611629 | 19.71109 | 4.88E-57  | 4.26E-56  | 117.4515 |
| EIF4A1       | 1.284463 | 7.915719 | 13.67633 | 8.58E-34  | 4.57E-33  | 63.9571  |
| CD68         | 4.680008 | 4.700771 | 38.3714  | 3.07E-121 | 4.74E-119 | 265.5301 |
| MPDU1        | 1.39455  | 5.002746 | 23.78626 | 1.65E-72  | 2.20E-71  | 153.1108 |
| TP53         | 1.613285 | 3.575382 | 23.41989 | 3.82E-71  | 4.89E-70  | 149.9629 |
| WRAP53       | 1.153815 | 2.332712 | 23.43637 | 3.31E-71  | 4.25E-70  | 150.1048 |
| DNAH2        | 1.183815 | 0.719599 | 16.84091 | 6.45E-46  | 4.40E-45  | 91.84109 |
| KDM6B        | 1.027114 | 2.958392 | 14.68617 | 1.28E-37  | 7.40E-37  | 72.74814 |
| NAA38        | 1.795549 | 5.345744 | 28.13655 | 3.15E-88  | 7.33E-87  | 189.36   |
| TRAPPC1      | 1.798595 | 5.99021  | 26.54535 | 1.37E-82  | 2.57E-81  | 176.3555 |
| ALOX15B      | 1.251778 | 1.179188 | 10.55308 | 1.63E-22  | 6.84E-22  | 38.08316 |
| AURKB        | 2.738832 | 1.718713 | 40.45115 | 2.78E-127 | 6.24E-125 | 279.4782 |
| RANGRF       | 1.82103  | 3.529287 | 26.3099  | 9.59E-82  | 1.74E-80  | 174.4056 |
| NDEL1        | 1.120185 | 3.984447 | 18.03175 | 1.55E-50  | 1.16E-49  | 102.4765 |
| MYH10        | 1.576799 | 2.753948 | 18.49753 | 2.42E-52  | 1.89E-51  | 106.6367 |
| PIK3R5       | 1.274452 | 1.542399 | 15.21241 | 1.25E-39  | 7.46E-39  | 77.37833 |
| STX8         | 1.471997 | 4.929904 | 24.92481 | 1.03E-76  | 1.58E-75  | 162.8048 |
| GAS7         | 2.038813 | 2.121071 | 24.38714 | 9.78E-75  | 1.41E-73  | 158.244  |
| SCO1         | 1.258798 | 2.910102 | 27.10407 | 1.39E-84  | 2.78E-83  | 180.9566 |

|              |          |          |          |           |           |          |
|--------------|----------|----------|----------|-----------|-----------|----------|
| LINC00675    | 1.55606  | 0.828161 | 15.58485 | 4.61E-41  | 2.84E-40  | 80.67098 |
| HS3ST3A1     | 1.184257 | 0.65286  | 17.81932 | 1.03E-49  | 7.62E-49  | 100.5785 |
| HS3ST3B1     | 1.063106 | 0.914156 | 23.38655 | 5.09E-71  | 6.49E-70  | 149.6757 |
| PMP22        | 2.820046 | 4.566178 | 28.62843 | 6.06E-90  | 1.54E-88  | 193.3176 |
| CDRT4        | -1.09808 | 2.352159 | -10.9859 | 5.21E-24  | 2.26E-23  | 41.50748 |
| TRIM16       | 2.867384 | 3.372566 | 37.76551 | 1.94E-119 | 2.63E-117 | 261.374  |
| ZNF286A      | 1.012464 | 1.969363 | 17.95549 | 3.06E-50  | 2.28E-49  | 101.7952 |
| UBE2SP1      | 1.369372 | 0.807904 | 23.80547 | 1.40E-72  | 1.87E-71  | 153.2755 |
| MEIS3P1      | 1.034725 | 1.656052 | 15.29569 | 5.97E-40  | 3.60E-39  | 78.11363 |
| TD-3157E16.  | 1.394205 | 2.775033 | 20.36625 | 1.46E-59  | 1.36E-58  | 123.2647 |
| ADORA2B      | 1.862136 | 1.508244 | 24.14012 | 8.01E-74  | 1.12E-72  | 156.1383 |
| CENPV        | 1.22578  | 4.057964 | 14.41444 | 1.39E-36  | 7.83E-36  | 70.36912 |
| UBB          | 1.503742 | 9.450887 | 16.65714 | 3.32E-45  | 2.23E-44  | 90.20223 |
| RP11-138I1.4 | 2.42006  | 5.729635 | 29.73634 | 9.25E-94  | 2.81E-92  | 202.1218 |
| TRPV2        | 2.256167 | 3.000825 | 28.62945 | 6.01E-90  | 1.53E-88  | 193.3258 |
| LRRC75A      | 1.006287 | 1.246796 | 18.86565 | 9.06E-54  | 7.31E-53  | 109.9221 |
| MPRIP        | 1.144821 | 6.007577 | 15.26739 | 7.66E-40  | 4.61E-39  | 77.86371 |
| RAI1         | 1.115479 | 3.122336 | 17.17846 | 3.17E-47  | 2.22E-46  | 94.85373 |
| SREBF1       | 1.312069 | 4.684552 | 16.14879 | 3.08E-43  | 1.98E-42  | 85.67581 |
| ALKBH5       | 1.27615  | 4.660724 | 22.51811 | 9.27E-68  | 1.08E-66  | 142.1595 |
| LLGL1        | 1.398401 | 2.354293 | 24.21565 | 4.21E-74  | 5.94E-73  | 156.7829 |
| SHMT1        | 1.144789 | 2.873914 | 18.10579 | 7.99E-51  | 6.02E-50  | 103.138  |
| LGALS9C      | 1.120597 | 0.613207 | 14.46612 | 8.85E-37  | 5.00E-36  | 70.82089 |
| TD-2303H24.  | -1.02097 | 1.97804  | -10.5396 | 1.81E-22  | 7.60E-22  | 37.97777 |
| UBE2SP2      | 2.743282 | 1.35305  | 50.3573  | 2.14E-153 | 3.69E-150 | 339.7532 |
| TVP23B       | 1.042035 | 4.333419 | 15.35975 | 3.39E-40  | 2.05E-39  | 78.67958 |
| FAM83G       | 1.116732 | 2.634216 | 17.16249 | 3.65E-47  | 2.55E-46  | 94.71115 |
| GRAP         | 1.730976 | 1.334026 | 26.19082 | 2.57E-81  | 4.60E-80  | 173.4168 |
| SNORD3A      | 1.579963 | 5.638094 | 7.846796 | 6.59E-14  | 2.27E-13  | 18.43091 |
| EPN2         | 1.00486  | 3.124398 | 17.40957 | 4.02E-48  | 2.86E-47  | 96.91773 |
| MAPK7        | 1.195453 | 2.694729 | 20.55881 | 2.67E-60  | 2.52E-59  | 124.9688 |
| MFAP4        | 2.383554 | 4.893672 | 18.90812 | 6.20E-54  | 5.03E-53  | 110.3009 |
| ALDH3A1      | 2.753217 | 1.623537 | 22.51815 | 9.26E-68  | 1.08E-66  | 142.1598 |
| SPECC1       | 2.186739 | 2.930111 | 35.40677 | 3.00E-112 | 2.59E-110 | 244.7844 |
| LGALS9B      | 1.074012 | 0.551214 | 12.68064 | 4.33E-30  | 2.14E-29  | 55.45234 |
| CDC144NL-AS  | 1.632708 | 0.945226 | 28.37387 | 4.67E-89  | 1.13E-87  | 191.2732 |
| RP11-746M1.1 | 1.771058 | 2.975468 | 12.93732 | 4.90E-31  | 2.47E-30  | 57.62635 |
| DHRS7B       | 1.476395 | 3.89451  | 27.80633 | 4.54E-87  | 1.00E-85  | 186.6865 |
| TMEM11       | 1.270295 | 3.645396 | 25.04668 | 3.68E-77  | 5.74E-76  | 163.8343 |
| MAP2K3       | 2.137231 | 4.530603 | 30.6443  | 7.73E-97  | 2.74E-95  | 209.2227 |
| KSR1         | -2.25069 | 4.877784 | -19.0027 | 2.67E-54  | 2.18E-53  | 111.1447 |
| RP11-19P22.8 | -1.30734 | 3.046092 | -11.8664 | 3.97E-27  | 1.84E-26  | 48.65567 |
| LGALS9       | 3.985171 | 5.430032 | 40.8814  | 1.66E-128 | 4.07E-126 | 282.3037 |
| TD-2008P7.9  | -2.93437 | 2.064099 | -42.683  | 1.54E-133 | 6.01E-131 | 293.9177 |
| TMEM97       | -1.05195 | 4.81255  | -11.3604 | 2.52E-25  | 1.13E-24  | 44.51956 |
| TMEM199      | 1.497521 | 3.138655 | 28.54804 | 1.15E-89  | 2.88E-88  | 192.6729 |
| PIGS         | 1.861001 | 4.246278 | 28.87918 | 8.19E-91  | 2.17E-89  | 195.3236 |
| ALDOC        | 2.687879 | 2.751844 | 31.09227 | 2.43E-98  | 9.32E-97  | 212.6881 |
| SPAG5        | 2.171501 | 2.178736 | 32.79415 | 6.02E-104 | 3.16E-102 | 225.6243 |
| SDF2         | 1.772232 | 4.902762 | 30.72004 | 4.30E-97  | 1.54E-95  | 209.8103 |
| RAB34        | 3.460791 | 4.035983 | 37.25303 | 6.69E-118 | 8.24E-116 | 257.8255 |
| RPL23A       | 1.035977 | 9.582315 | 11.03024 | 3.65E-24  | 1.59E-23  | 41.86161 |
| TLCD1        | 1.695856 | 3.140597 | 25.03638 | 4.01E-77  | 6.25E-76  | 163.7473 |
| TRAF4        | 1.345359 | 4.937921 | 16.4494  | 2.12E-44  | 1.40E-43  | 88.35108 |



|               |           |           |           |            |            |           |
|---------------|-----------|-----------|-----------|------------|------------|-----------|
| FAM222B       | 1. 904317 | 2. 896897 | 33. 82607 | 2. 86E-107 | 1. 81E-105 | 233. 2923 |
| ERAL1         | 1. 391843 | 4. 186057 | 26. 46828 | 2. 59E-82  | 4. 80E-81  | 175. 718  |
| FLOT2         | 1. 936445 | 5. 0678   | 24. 82712 | 2. 35E-76  | 3. 58E-75  | 161. 9785 |
| RP11-20B24. 4 | 1. 207721 | 2. 016514 | 17. 07777 | 7. 79E-47  | 5. 41E-46  | 93. 95478 |
| MYO18A        | 1. 159197 | 4. 448752 | 19. 64505 | 8. 77E-57  | 7. 63E-56  | 116. 8644 |
| NUFIP2        | 1. 357153 | 3. 033765 | 22. 59882 | 4. 60E-68  | 5. 38E-67  | 142. 8609 |
| TAOK1         | 1. 417264 | 2. 322183 | 25. 90472 | 2. 78E-80  | 4. 79E-79  | 171. 0347 |
| ABHD15        | 1. 149241 | 2. 535877 | 21. 87705 | 2. 47E-65  | 2. 68E-64  | 136. 5677 |
| TP53I13       | 1. 065912 | 4. 809501 | 14. 30018 | 3. 78E-36  | 2. 10E-35  | 69. 37155 |
| GIT1          | 1. 267613 | 3. 946372 | 21. 92712 | 1. 59E-65  | 1. 74E-64  | 137. 0057 |
| NSRP1         | 1. 034523 | 3. 688895 | 17. 55499 | 1. 10E-48  | 7. 90E-48  | 98. 21684 |
| CPD           | 2. 073664 | 3. 396511 | 29. 26154 | 3. 92E-92  | 1. 11E-90  | 198. 3674 |
| GOSR1         | 1. 075135 | 3. 441881 | 19. 46188 | 4. 47E-56  | 3. 82E-55  | 115. 2348 |
| AC005562. 1   | 1. 021655 | 1. 716298 | 22. 47898 | 1. 30E-67  | 1. 51E-66  | 141. 8192 |
| CRLF3         | 1. 482915 | 2. 148004 | 27. 66632 | 1. 41E-86  | 3. 07E-85  | 185. 5489 |
| TEFM          | 1. 128131 | 2. 152101 | 24. 68526 | 7. 80E-76  | 1. 16E-74  | 160. 7768 |
| ADAP2         | 1. 23444  | 1. 845923 | 19. 10469 | 1. 08E-54  | 8. 90E-54  | 112. 0535 |
| RNF135        | 1. 288367 | 3. 160686 | 23. 96099 | 3. 69E-73  | 5. 04E-72  | 154. 6074 |
| NF1           | 1. 062823 | 2. 811078 | 19. 11315 | 9. 97E-55  | 8. 26E-54  | 112. 1289 |
| EVI2B         | 2. 66897  | 2. 207562 | 26. 6459  | 5. 97E-83  | 1. 13E-81  | 177. 1863 |
| EVI2A         | 2. 626727 | 1. 90596  | 30. 25655 | 1. 58E-95  | 5. 22E-94  | 206. 2028 |
| AK4P1         | 1. 346816 | 0. 811376 | 20. 72457 | 6. 16E-61  | 5. 95E-60  | 126. 4339 |
| COPRS         | 1. 325367 | 4. 617342 | 23. 11791 | 5. 15E-70  | 6. 39E-69  | 147. 3583 |
| UTP6          | 1. 241644 | 4. 589509 | 19. 8717  | 1. 17E-57  | 1. 04E-56  | 118. 8786 |
| SUZ12         | 1. 236313 | 2. 684701 | 22. 95637 | 2. 08E-69  | 2. 53E-68  | 145. 9614 |
| ZNF207        | 1. 266553 | 5. 421381 | 18. 4192  | 4. 87E-52  | 3. 78E-51  | 105. 9373 |
| PSMD11        | 1. 832213 | 4. 773631 | 29. 64    | 1. 97E-93  | 5. 92E-92  | 201. 3623 |
| CDK5R1        | 1. 056559 | 1. 015117 | 17. 3211  | 8. 86E-48  | 6. 27E-47  | 96. 12756 |
| MYO1D         | 1. 961377 | 4. 459561 | 24. 47652 | 4. 58E-75  | 6. 68E-74  | 159. 0044 |
| TMEM98        | 1. 201921 | 5. 338719 | 15. 15537 | 2. 06E-39  | 1. 23E-38  | 76. 87511 |
| SPACA3        | -1. 24069 | 1. 083143 | -17. 5014 | 1. 77E-48  | 1. 27E-47  | 97. 73789 |
| CCL2          | 1. 201671 | 5. 171457 | 7. 185443 | 4. 81E-12  | 1. 57E-11  | 14. 19908 |
| CCL11         | 1. 209538 | 1. 362666 | 12. 05696 | 8. 15E-28  | 3. 85E-27  | 50. 23178 |
| CCL13         | 2. 130459 | 1. 340118 | 20. 04378 | 2. 55E-58  | 2. 29E-57  | 120. 4062 |
| ZNF830        | 1. 291232 | 2. 873103 | 25. 71319 | 1. 37E-79  | 2. 32E-78  | 169. 4347 |
| RFFL          | 1. 305414 | 3. 121864 | 21. 76465 | 6. 60E-65  | 7. 08E-64  | 135. 5838 |
| SLFN5         | 2. 004091 | 2. 011774 | 28. 94619 | 4. 80E-91  | 1. 29E-89  | 195. 8583 |
| SLFN11        | 1. 499801 | 2. 456836 | 17. 23538 | 1. 91E-47  | 1. 34E-46  | 95. 36198 |
| P11-686D22.   | 1. 156656 | 0. 975324 | 23. 75403 | 2. 17E-72  | 2. 89E-71  | 152. 8344 |
| P11-686D22.   | 1. 07838  | 1. 099615 | 23. 26117 | 1. 50E-70  | 1. 89E-69  | 148. 595  |
| SLFN12        | 1. 294354 | 1. 499315 | 23. 99182 | 2. 84E-73  | 3. 90E-72  | 154. 8711 |
| SLFN13        | 1. 808411 | 2. 067849 | 15. 22848 | 1. 08E-39  | 6. 48E-39  | 77. 52019 |
| 11-1094M14.   | 1. 26392  | 2. 049752 | 26. 99357 | 3. 43E-84  | 6. 80E-83  | 180. 0496 |
| AP2B1         | 2. 255881 | 4. 799437 | 33. 56449 | 1. 97E-106 | 1. 19E-104 | 231. 361  |
| TAF15         | 1. 297278 | 5. 805385 | 19. 76229 | 3. 10E-57  | 2. 72E-56  | 117. 9066 |
| MMP28         | 4. 671016 | 2. 941952 | 45. 53306 | 3. 35E-141 | 2. 42E-138 | 311. 6021 |
| CCL5          | 3. 45502  | 2. 806946 | 33. 99161 | 8. 49E-108 | 5. 57E-106 | 234. 5101 |
| CCL15-CCL14   | 2. 593367 | 1. 644243 | 22. 96753 | 1. 89E-69  | 2. 30E-68  | 146. 058  |
| CCL15         | 1. 829315 | 0. 964248 | 17. 08191 | 7. 50E-47  | 5. 21E-46  | 93. 9918  |
| CCL18         | 4. 713159 | 2. 391339 | 34. 25448 | 1. 24E-108 | 8. 64E-107 | 236. 4372 |
| CCL3          | 2. 337323 | 1. 652786 | 25. 59647 | 3. 64E-79  | 6. 08E-78  | 168. 4575 |
| CCL4          | 2. 199256 | 1. 931598 | 23. 60844 | 7. 56E-72  | 9. 87E-71  | 151. 5846 |
| CCL3L3        | 1. 36609  | 0. 86421  | 18. 37273 | 7. 37E-52  | 5. 70E-51  | 105. 5223 |
| CCL4L2        | 2. 26997  | 1. 422999 | 24. 21882 | 4. 09E-74  | 5. 79E-73  | 156. 8099 |

|               |           |           |           |            |            |           |
|---------------|-----------|-----------|-----------|------------|------------|-----------|
| ZNHIT3        | 1. 132469 | 4. 477454 | 19. 16277 | 6. 41E-55  | 5. 33E-54  | 112. 5711 |
| PIGW          | 1. 058235 | 1. 88205  | 21. 10949 | 2. 07E-62  | 2. 08E-61  | 129. 8292 |
| AATF          | 1. 490987 | 4. 531437 | 22. 2587  | 8. 84E-67  | 9. 98E-66  | 139. 9009 |
| ACACA         | 1. 270421 | 3. 077287 | 22. 15827 | 2. 12E-66  | 2. 37E-65  | 139. 025  |
| DUSP14        | 1. 958061 | 2. 652584 | 31. 8594  | 6. 91E-101 | 3. 03E-99  | 218. 564  |
| ARHGAP23      | 2. 552243 | 2. 491919 | 27. 98233 | 1. 09E-87  | 2. 48E-86  | 188. 1131 |
| AC124789. 1   | 1. 657647 | 1. 087587 | 16. 10937 | 4. 37E-43  | 2. 81E-42  | 85. 32532 |
| PCGF2         | 1. 784433 | 4. 250211 | 21. 07576 | 2. 79E-62  | 2. 78E-61  | 129. 5321 |
| PSMB3         | 2. 654404 | 6. 230578 | 36. 26715 | 6. 62E-115 | 6. 83E-113 | 250. 9122 |
| PIP4K2B       | 1. 114077 | 3. 380386 | 19. 56861 | 1. 73E-56  | 1. 49E-55  | 116. 1845 |
| RPL23         | 1. 023105 | 9. 968496 | 10. 46643 | 3. 22E-22  | 1. 34E-21  | 37. 40552 |
| LASP1         | 2. 175001 | 5. 45987  | 30. 16154 | 3. 31E-95  | 1. 08E-93  | 205. 46   |
| PLXDC1        | 2. 118362 | 2. 623747 | 25. 67749 | 1. 85E-79  | 3. 11E-78  | 169. 1359 |
| CACNB1        | 1. 224177 | 2. 07389  | 16. 13882 | 3. 37E-43  | 2. 17E-42  | 85. 5872  |
| RPL19         | 1. 072251 | 10. 49951 | 10. 80734 | 2. 17E-23  | 9. 30E-23  | 40. 08696 |
| CTB-131K11. 1 | 1. 354006 | 2. 534844 | 23. 8693  | 8. 09E-73  | 1. 09E-71  | 153. 8224 |
| MED1          | 1. 561116 | 2. 686837 | 30. 62634 | 8. 89E-97  | 3. 15E-95  | 209. 0833 |
| CDK12         | 1. 086027 | 3. 157825 | 18. 6447  | 6. 50E-53  | 5. 14E-52  | 107. 9505 |
| PPP1R1B       | 1. 364602 | 5. 451478 | 8. 891808 | 4. 63E-17  | 1. 72E-16  | 25. 61407 |
| STARD3        | 1. 081055 | 4. 774582 | 15. 01628 | 7. 03E-39  | 4. 15E-38  | 75. 64938 |
| PGAP3         | 1. 167202 | 4. 188577 | 15. 84734 | 4. 49E-42  | 2. 82E-41  | 82. 99792 |
| ERBB2         | 2. 00264  | 5. 074062 | 23. 19399 | 2. 67E-70  | 3. 35E-69  | 148. 0153 |
| MIEN1         | 1. 493542 | 5. 22179  | 20. 78534 | 3. 61E-61  | 3. 50E-60  | 126. 9706 |
| IKZF3         | 1. 163873 | 0. 74356  | 16. 69606 | 2. 35E-45  | 1. 58E-44  | 90. 54924 |
| GSDMB         | 2. 186621 | 4. 080313 | 21. 11335 | 2. 00E-62  | 2. 01E-61  | 129. 8631 |
| PSMD3         | 1. 3762   | 5. 247159 | 22. 08912 | 3. 88E-66  | 4. 30E-65  | 138. 4214 |
| NR1D1         | 1. 20186  | 3. 491145 | 11. 29974 | 4. 13E-25  | 1. 84E-24  | 44. 02858 |
| RAPGEFL1      | 2. 287419 | 3. 236467 | 20. 74645 | 5. 08E-61  | 4. 92E-60  | 126. 6272 |
| WIPF2         | 1. 185641 | 2. 927234 | 22. 05568 | 5. 19E-66  | 5. 73E-65  | 138. 1293 |
| CDC6          | 1. 455399 | 1. 394775 | 22. 18006 | 1. 75E-66  | 1. 97E-65  | 139. 2151 |
| RARA          | 2. 503917 | 3. 73964  | 35. 06573 | 3. 47E-111 | 2. 82E-109 | 242. 3307 |
| RARA-AS1      | 1. 260452 | 1. 228486 | 27. 03633 | 2. 41E-84  | 4. 82E-83  | 180. 4008 |
| TD-2267D19.   | 1. 320152 | 1. 572139 | 30. 37364 | 6. 33E-96  | 2. 14E-94  | 207. 1167 |
| TOP2A         | 3. 476377 | 2. 01708  | 47. 85173 | 3. 53E-147 | 3. 96E-144 | 325. 4004 |
| IGFBP4        | 2. 950753 | 7. 14829  | 26. 86082 | 1. 02E-83  | 1. 99E-82  | 178. 958  |
| RP11-5809. 2  | 1. 486526 | 0. 720368 | 19. 69766 | 5. 50E-57  | 4. 80E-56  | 117. 3321 |
| TNS4          | 4. 550337 | 2. 277912 | 36. 09975 | 2. 16E-114 | 2. 18E-112 | 249. 7269 |
| CCR7          | 1. 695554 | 1. 125572 | 15. 72202 | 1. 37E-41  | 8. 50E-41  | 81. 88637 |
| SMARCE1       | 1. 859176 | 5. 240594 | 28. 83759 | 1. 14E-90  | 3. 00E-89  | 194. 9914 |
| KRT20         | 1. 55974  | 0. 797289 | 8. 789613 | 9. 65E-17  | 3. 56E-16  | 24. 88687 |
| KRT23         | 3. 352415 | 2. 589946 | 22. 67192 | 2. 44E-68  | 2. 88E-67  | 143. 4957 |
| KRT15         | 2. 981392 | 2. 280856 | 27. 53563 | 4. 09E-86  | 8. 72E-85  | 184. 4849 |
| KRT19         | 6. 470575 | 7. 154498 | 52. 04878 | 1. 85E-157 | 4. 47E-154 | 349. 1323 |
| KRT14         | 1. 052622 | 1. 453907 | 6. 514578 | 2. 86E-10  | 8. 82E-10  | 10. 18413 |
| KRT16         | 4. 93835  | 2. 620128 | 30. 87914 | 1. 26E-97  | 4. 64E-96  | 211. 0425 |
| KRT17         | 7. 336215 | 4. 388286 | 45. 051   | 6. 26E-140 | 3. 91E-137 | 308. 6683 |
| JUP           | 3. 005262 | 6. 033959 | 36. 4537  | 1. 78E-115 | 1. 90E-113 | 252. 2292 |
| P3H4          | 1. 370476 | 3. 566357 | 21. 50551 | 6. 39E-64  | 6. 66E-63  | 133. 3115 |
| FKBP10        | 2. 921007 | 4. 55771  | 31. 01041 | 4. 57E-98  | 1. 73E-96  | 212. 0567 |
| ACLY          | 1. 500813 | 4. 720194 | 21. 22162 | 7. 73E-63  | 7. 85E-62  | 130. 8163 |
| CNP           | 1. 933363 | 4. 529356 | 33. 0271  | 1. 06E-104 | 5. 83E-103 | 227. 3668 |
| DNAJC7        | 1. 621648 | 5. 359884 | 25. 70509 | 1. 47E-79  | 2. 48E-78  | 169. 3669 |
| NKIRAS2       | 2. 017537 | 3. 641973 | 35. 52583 | 1. 28E-112 | 1. 12E-110 | 245. 6376 |
| DHX58         | 1. 655835 | 3. 350959 | 22. 69275 | 2. 04E-68  | 2. 41E-67  | 143. 6765 |

|             |           |           |           |            |            |           |
|-------------|-----------|-----------|-----------|------------|------------|-----------|
| RAB5C       | 2. 107065 | 5. 730625 | 31. 10646 | 2. 18E-98  | 8. 38E-97  | 212. 7975 |
| GHDC        | 1. 114832 | 4. 102396 | 18. 19968 | 3. 45E-51  | 2. 63E-50  | 103. 9767 |
| STAT5A      | 1. 552861 | 3. 463181 | 23. 48674 | 2. 15E-71  | 2. 77E-70  | 150. 5382 |
| STAT3       | 1. 096635 | 5. 382066 | 12. 39754 | 4. 72E-29  | 2. 28E-28  | 53. 07119 |
| PTRF        | 3. 122153 | 4. 927468 | 33. 60433 | 1. 46E-106 | 8. 90E-105 | 231. 6557 |
| ATP6V0A1    | 1. 327338 | 4. 344051 | 19. 79519 | 2. 31E-57  | 2. 04E-56  | 118. 199  |
| P11-400F19. | 1. 136167 | 2. 699746 | 22. 06244 | 4. 89E-66  | 5. 41E-65  | 138. 1884 |
| TUBG2       | -1. 41581 | 4. 392448 | -13. 0328 | 2. 17E-31  | 1. 10E-30  | 58. 43832 |
| PLEKHH3     | -1. 01565 | 4. 766554 | -10. 1563 | 3. 61E-21  | 1. 48E-20  | 35. 00265 |
| RAMP2       | 2. 178559 | 3. 762292 | 25. 04624 | 3. 69E-77  | 5. 76E-76  | 163. 8306 |
| VPS25       | 1. 586496 | 5. 018875 | 26. 79995 | 1. 68E-83  | 3. 26E-82  | 178. 4568 |
| BECN1       | 1. 732882 | 4. 918082 | 29. 35157 | 1. 92E-92  | 5. 48E-91  | 199. 0815 |
| PSME3       | 1. 514539 | 4. 672072 | 23. 65523 | 5. 06E-72  | 6. 64E-71  | 151. 9865 |
| AOC3        | 2. 290961 | 3. 160808 | 24. 01423 | 2. 34E-73  | 3. 22E-72  | 155. 0627 |
| LINC00671   | -2. 88182 | 2. 202155 | -24. 4187 | 7. 48E-75  | 1. 08E-73  | 158. 5123 |
| RUNDC1      | 1. 233851 | 2. 580201 | 27. 63297 | 1. 85E-86  | 4. 01E-85  | 185. 2775 |
| RPL27       | 1. 228535 | 10. 16117 | 12. 57021 | 1. 10E-29  | 5. 39E-29  | 54. 52137 |
| IFI35       | 2. 835676 | 4. 244883 | 35. 80033 | 1. 81E-113 | 1. 69E-111 | 247. 5984 |
| VAT1        | 1. 952475 | 5. 606538 | 26. 4342  | 3. 43E-82  | 6. 33E-81  | 175. 4358 |
| BRCA1       | 1. 285637 | 1. 357518 | 26. 82794 | 1. 34E-83  | 2. 59E-82  | 178. 6873 |
| NBR1        | 1. 821723 | 4. 505643 | 29. 10092 | 1. 40E-91  | 3. 86E-90  | 197. 091  |
| TMEM106A    | 1. 012439 | 1. 671606 | 23. 05092 | 9. 18E-70  | 1. 13E-68  | 146. 7793 |
| ARL4D       | 2. 169705 | 1. 928913 | 25. 57749 | 4. 27E-79  | 7. 11E-78  | 168. 2985 |
| DHX8        | 1. 831564 | 3. 705048 | 34. 93759 | 8. 73E-111 | 6. 93E-109 | 241. 4051 |
| ETV4        | 2. 43088  | 3. 011533 | 24. 7682  | 3. 86E-76  | 5. 84E-75  | 161. 4797 |
| MEOX1       | 1. 402793 | 1. 296949 | 16. 63777 | 3. 95E-45  | 2. 65E-44  | 90. 02961 |
| DUSP3       | 1. 326301 | 4. 412758 | 20. 81702 | 2. 73E-61  | 2. 65E-60  | 127. 2502 |
| PPY         | 2. 464003 | 5. 208098 | 7. 707137 | 1. 66E-13  | 5. 67E-13  | 17. 51582 |
| NAGS        | 1. 827085 | 1. 238202 | 29. 24863 | 4. 35E-92  | 1. 22E-90  | 198. 265  |
| LSM12       | 1. 551933 | 3. 950197 | 29. 34163 | 2. 08E-92  | 5. 92E-91  | 199. 0026 |
| G6PC3       | 1. 465272 | 5. 122455 | 23. 9727  | 3. 34E-73  | 4. 57E-72  | 154. 7075 |
| HDAC5       | 1. 099885 | 4. 170686 | 17. 22613 | 2. 07E-47  | 1. 45E-46  | 95. 27944 |
| C17orf53    | 1. 052867 | 0. 744868 | 28. 18185 | 2. 19E-88  | 5. 13E-87  | 189. 7258 |
| TMUB2       | 1. 123852 | 4. 554638 | 18. 79081 | 1. 77E-53  | 1. 41E-52  | 109. 2544 |
| ATXN7L3     | 1. 454399 | 4. 018552 | 24. 05611 | 1. 64E-73  | 2. 27E-72  | 155. 4207 |
| SLC25A39    | 1. 20677  | 6. 286909 | 16. 79034 | 1. 01E-45  | 6. 88E-45  | 91. 38997 |
| GRN         | 3. 415016 | 6. 74123  | 42. 45112 | 6. 71E-133 | 2. 45E-130 | 292. 4421 |
| FZD2        | 1. 917577 | 1. 55536  | 34. 86529 | 1. 47E-110 | 1. 14E-108 | 240. 882  |
| CCDC43      | 1. 470811 | 2. 916049 | 32. 25003 | 3. 59E-102 | 1. 69E-100 | 221. 5277 |
| GJC1        | 1. 070737 | 1. 066199 | 21. 30619 | 3. 68E-63  | 3. 76E-62  | 131. 5602 |
| EFTUD2      | 1. 841125 | 4. 568776 | 31. 6455  | 3. 52E-100 | 1. 49E-98  | 216. 933  |
| KIF18B      | 1. 556672 | 0. 877309 | 31. 70039 | 2. 32E-100 | 9. 85E-99  | 217. 3521 |
| DCAKD       | 1. 152938 | 3. 351722 | 21. 71812 | 9. 92E-65  | 1. 06E-63  | 135. 1762 |
| NMT1        | 1. 165263 | 4. 553082 | 18. 13396 | 6. 21E-51  | 4. 69E-50  | 103. 3896 |
| PLCD3       | 3. 595505 | 3. 555149 | 39. 90469 | 1. 03E-125 | 2. 05E-123 | 275. 8603 |
| HEXIM1      | 1. 365402 | 3. 620985 | 22. 53354 | 8. 10E-68  | 9. 42E-67  | 142. 2936 |
| TD-2020K17. | 1. 067394 | 1. 281795 | 12. 45563 | 2. 90E-29  | 1. 40E-28  | 53. 55831 |
| FMNL1       | 2. 272744 | 3. 199777 | 23. 50563 | 1. 83E-71  | 2. 36E-70  | 150. 7008 |
| ARHGAP27    | 2. 623464 | 3. 68099  | 30. 33789 | 8. 36E-96  | 2. 81E-94  | 206. 8379 |
| CTB-39G8. 3 | 1. 465488 | 1. 260049 | 18. 67255 | 5. 07E-53  | 4. 02E-52  | 108. 1991 |
| PLEKHM1     | 1. 648416 | 3. 354059 | 26. 59155 | 9. 35E-83  | 1. 77E-81  | 176. 7374 |
| ARL17B      | 1. 001566 | 1. 514319 | 18. 65189 | 6. 10E-53  | 4. 82E-52  | 108. 0147 |
| CDC27       | 1. 499175 | 3. 414937 | 25. 59416 | 3. 71E-79  | 6. 20E-78  | 168. 4382 |
| ITGB3       | 1. 48736  | 0. 960299 | 23. 54373 | 1. 32E-71  | 1. 71E-70  | 151. 0285 |

|              |          |          |          |           |           |          |
|--------------|----------|----------|----------|-----------|-----------|----------|
| KPNB1        | 1.433495 | 5.484865 | 19.48743 | 3.56E-56  | 3.05E-55  | 115.4623 |
| RP11-138C9.1 | 1.726774 | 3.17154  | 15.05392 | 5.05E-39  | 2.99E-38  | 75.98094 |
| SP6          | 1.3572   | 0.854849 | 23.99627 | 2.73E-73  | 3.75E-72  | 154.9091 |
| RP11-6N17.4  | 1.595386 | 2.05879  | 27.51648 | 4.78E-86  | 1.02E-84  | 184.3288 |
| SP2          | 1.083568 | 2.795867 | 21.08614 | 2.55E-62  | 2.54E-61  | 129.6235 |
| PNPO         | 1.121901 | 2.960096 | 21.15179 | 1.43E-62  | 1.44E-61  | 130.2017 |
| RP11-6N17.6  | 1.779954 | 1.440101 | 16.80602 | 8.81E-46  | 5.99E-45  | 91.52987 |
| COPZ2        | 1.934457 | 4.015393 | 25.30171 | 4.31E-78  | 6.94E-77  | 165.9831 |
| NFE2L1       | 2.232037 | 5.14595  | 31.66624 | 3.01E-100 | 1.27E-98  | 217.0914 |
| RP5-890E16.4 | 1.168772 | 0.797596 | 9.099487 | 1.03E-17  | 3.88E-17  | 27.10731 |
| CBX1         | 1.720844 | 3.987972 | 27.10478 | 1.38E-84  | 2.77E-83  | 180.9624 |
| SNX11        | 1.370864 | 3.1654   | 28.43616 | 2.83E-89  | 6.93E-88  | 191.7742 |
| SKAP1        | 2.107273 | 2.478523 | 24.18855 | 5.30E-74  | 7.47E-73  | 156.5517 |
| HOXB2        | 2.462363 | 2.560436 | 29.23551 | 4.82E-92  | 1.35E-90  | 198.1608 |
| HOXB-AS1     | 1.442508 | 1.094419 | 25.46643 | 1.08E-78  | 1.78E-77  | 167.3671 |
| HOXB3        | 1.935173 | 2.485709 | 22.4015  | 2.55E-67  | 2.93E-66  | 141.1449 |
| HOXB-AS3     | 2.305838 | 1.569186 | 30.7365  | 3.79E-97  | 1.36E-95  | 209.938  |
| HOXB4        | 1.181666 | 1.127317 | 21.95367 | 1.26E-65  | 1.38E-64  | 137.2379 |
| HOXB5        | 2.347065 | 1.522242 | 34.92564 | 9.51E-111 | 7.53E-109 | 241.3186 |
| HOXB6        | 2.91761  | 2.003608 | 33.90576 | 1.59E-107 | 1.03E-105 | 233.879  |
| HOXB7        | 3.439387 | 2.190432 | 40.96958 | 9.32E-129 | 2.38E-126 | 282.8802 |
| HOXB8        | 1.135531 | 0.603257 | 14.47261 | 8.36E-37  | 4.73E-36  | 70.8777  |
| HOXB9        | 1.815895 | 0.876767 | 20.79216 | 3.40E-61  | 3.30E-60  | 127.0308 |
| P11-357H14.1 | 1.856189 | 0.892128 | 19.66353 | 7.45E-57  | 6.48E-56  | 117.0287 |
| TD-2377D24.  | 3.156961 | 1.515215 | 20.47655 | 5.51E-60  | 5.18E-59  | 124.2411 |
| CALCOCO2     | 1.12094  | 5.15664  | 14.9418  | 1.36E-38  | 7.96E-38  | 74.9938  |
| ATP5G1       | 1.722733 | 6.152041 | 24.3802  | 1.04E-74  | 1.49E-73  | 158.185  |
| UBE2Z        | 1.851989 | 4.748653 | 29.77966 | 6.58E-94  | 2.03E-92  | 202.4629 |
| SNF8         | 1.433647 | 5.692889 | 22.49178 | 1.16E-67  | 1.35E-66  | 141.9304 |
| GNGT2        | 1.458494 | 1.236861 | 24.41739 | 7.56E-75  | 1.09E-73  | 158.5014 |
| ABI3         | 2.015213 | 2.304313 | 26.92546 | 5.99E-84  | 1.18E-82  | 179.4898 |
| ZNF652       | 1.148626 | 3.321873 | 21.9492  | 1.32E-65  | 1.44E-64  | 137.1988 |
| PHB          | 2.056653 | 5.85173  | 31.61528 | 4.43E-100 | 1.86E-98  | 216.7021 |
| EIF4EP2      | 1.141613 | 1.550801 | 15.25545 | 8.52E-40  | 5.12E-39  | 77.75824 |
| NXPH3        | 1.069269 | 0.789039 | 19.76241 | 3.09E-57  | 2.72E-56  | 117.9077 |
| SPOP         | 1.121307 | 4.108068 | 19.4659  | 4.32E-56  | 3.69E-55  | 115.2707 |
| SLC35B1      | 1.063659 | 5.035449 | 16.77164 | 1.20E-45  | 8.12E-45  | 91.22319 |
| KAT7         | 1.048933 | 3.185756 | 19.42211 | 6.37E-56  | 5.42E-55  | 114.8809 |
| ITGA3        | 3.677099 | 5.23017  | 34.51914 | 1.81E-109 | 1.33E-107 | 238.3686 |
| RP5-875H18.9 | 1.056096 | 0.537665 | 15.80343 | 6.63E-42  | 4.16E-41  | 82.60837 |
| SAMD14       | 1.420423 | 0.987459 | 30.65113 | 7.34E-97  | 2.61E-95  | 209.2757 |
| PPP1R9B      | 1.593551 | 3.874473 | 26.01964 | 1.07E-80  | 1.87E-79  | 171.9927 |
| SGCA         | 1.188403 | 1.303154 | 14.62031 | 2.29E-37  | 1.31E-36  | 72.1707  |
| COL1A1       | 6.365447 | 6.863645 | 42.54559 | 3.68E-133 | 1.37E-130 | 293.044  |
| TMEM92       | 3.891884 | 2.3702   | 47.52887 | 2.33E-146 | 2.27E-143 | 323.5095 |
| XYLT2        | 1.289703 | 3.306285 | 25.09102 | 2.53E-77  | 3.97E-76  | 164.2084 |
| MRPL27       | 1.63989  | 5.235934 | 26.49362 | 2.10E-82  | 3.90E-81  | 175.9277 |
| CHAD         | -2.44892 | 2.069719 | -27.7069 | 1.02E-86  | 2.22E-85  | 185.8787 |
| P11-294J22.  | 1.069601 | 0.856966 | 10.81521 | 2.04E-23  | 8.74E-23  | 40.14932 |
| LINC00483    | 1.675356 | 0.828776 | 14.35487 | 2.34E-36  | 1.31E-35  | 69.84887 |
| NME1         | 1.746168 | 5.429497 | 22.80221 | 7.89E-69  | 9.44E-68  | 144.626  |
| NME2         | 1.67737  | 3.573016 | 20.70369 | 7.41E-61  | 7.14E-60  | 126.2495 |
| NME1-NME2    | 1.58057  | 8.499022 | 17.98527 | 2.35E-50  | 1.75E-49  | 102.0612 |
| UTP18        | 1.295886 | 3.883059 | 24.20424 | 4.64E-74  | 6.54E-73  | 156.6855 |

|               |           |           |           |            |            |           |
|---------------|-----------|-----------|-----------|------------|------------|-----------|
| MMD           | 2. 394022 | 2. 170807 | 34. 13844 | 2. 90E-108 | 1. 96E-106 | 235. 5875 |
| PCTP          | 1. 476516 | 3. 107032 | 26. 45054 | 3. 00E-82  | 5. 55E-81  | 175. 5711 |
| NOG           | 1. 061147 | 0. 582895 | 18. 84496 | 1. 09E-53  | 8. 78E-53  | 109. 7375 |
| SCPEP1        | 2. 133733 | 4. 381402 | 25. 81686 | 5. 78E-80  | 9. 88E-79  | 170. 3012 |
| AKAP1         | 1. 550632 | 4. 065799 | 22. 8242  | 6. 52E-69  | 7. 82E-68  | 144. 8167 |
| MSI2          | 1. 385007 | 3. 236733 | 23. 16385 | 3. 46E-70  | 4. 33E-69  | 147. 7551 |
| MRPS23        | 1. 422029 | 4. 259204 | 22. 79039 | 8. 74E-69  | 1. 04E-67  | 144. 5235 |
| CUEDC1        | 1. 442138 | 4. 234057 | 19. 65765 | 7. 84E-57  | 6. 83E-56  | 116. 9764 |
| SRSF1         | 1. 132146 | 5. 639329 | 15. 8639  | 3. 88E-42  | 2. 44E-41  | 83. 14488 |
| DYNLL2        | 1. 477283 | 3. 483098 | 28. 98261 | 3. 59E-91  | 9. 70E-90  | 196. 1488 |
| BZRAP1        | -1. 1316  | 3. 558303 | -13. 2738 | 2. 75E-32  | 1. 43E-31  | 60. 49647 |
| SUPT4H1       | 1. 732448 | 5. 091309 | 28. 03305 | 7. 26E-88  | 1. 66E-86  | 188. 5235 |
| 4-Sep         | 1. 344101 | 3. 068485 | 17. 32433 | 8. 61E-48  | 6. 09E-47  | 96. 15641 |
| RAD51C        | 1. 260974 | 3. 219182 | 23. 75997 | 2. 06E-72  | 2. 75E-71  | 152. 8854 |
| TRIM37        | 1. 316089 | 2. 284331 | 27. 18105 | 7. 38E-85  | 1. 49E-83  | 181. 5876 |
| SKA2          | 2. 004301 | 3. 405345 | 33. 38655 | 7. 33E-106 | 4. 31E-104 | 230. 0424 |
| PRR11         | 1. 92494  | 1. 102392 | 32. 70786 | 1. 15E-103 | 5. 97E-102 | 224. 9771 |
| CTD-2510F5. 4 | 1. 116444 | 0. 583649 | 22. 72695 | 1. 51E-68  | 1. 80E-67  | 143. 9733 |
| SMG8          | 1. 130444 | 2. 0602   | 20. 6948  | 8. 02E-61  | 7. 71E-60  | 126. 1709 |
| CLTC          | 2. 201592 | 5. 649162 | 33. 29788 | 1. 41E-105 | 8. 18E-104 | 229. 3839 |
| PTRH2         | 1. 652845 | 3. 701849 | 27. 56202 | 3. 30E-86  | 7. 06E-85  | 184. 6999 |
| VMP1          | 2. 044213 | 6. 096236 | 19. 19298 | 4. 90E-55  | 4. 08E-54  | 112. 8403 |
| WFDC21P       | 2. 794472 | 1. 896738 | 31. 53373 | 8. 26E-100 | 3. 41E-98  | 216. 0785 |
| CA4           | -1. 989   | 2. 619615 | -16. 4259 | 2. 61E-44  | 1. 72E-43  | 88. 14157 |
| USP32         | 1. 579846 | 2. 947245 | 30. 68046 | 5. 84E-97  | 2. 08E-95  | 209. 5034 |
| BCAS3         | 1. 246692 | 2. 677306 | 25. 68853 | 1. 69E-79  | 2. 84E-78  | 169. 2283 |
| TBX2          | 1. 255703 | 2. 211489 | 17. 99804 | 2. 09E-50  | 1. 57E-49  | 102. 1753 |
| MED13         | 1. 129851 | 2. 552761 | 21. 12067 | 1. 88E-62  | 1. 88E-61  | 129. 9277 |
| METTL2A       | 1. 160117 | 2. 634139 | 23. 76189 | 2. 03E-72  | 2. 71E-71  | 152. 9018 |
| TLK2          | 1. 436248 | 3. 27099  | 26. 7866  | 1. 88E-83  | 3. 62E-82  | 178. 3468 |
| P11-464D20.   | 1. 658954 | 1. 357303 | 28. 96202 | 4. 23E-91  | 1. 14E-89  | 195. 9846 |
| MRC2          | 3. 58455  | 3. 74146  | 35. 64047 | 5. 64E-113 | 5. 12E-111 | 246. 4576 |
| TANC2         | 1. 636955 | 1. 998815 | 23. 26779 | 1. 41E-70  | 1. 79E-69  | 148. 6521 |
| ACE           | 2. 627956 | 2. 943798 | 36. 3792  | 3. 01E-115 | 3. 16E-113 | 251. 7037 |
| DCAF7         | 1. 509661 | 3. 66173  | 25. 94854 | 1. 93E-80  | 3. 35E-79  | 171. 4002 |
| TACO1         | 1. 322545 | 3. 166823 | 26. 43812 | 3. 32E-82  | 6. 14E-81  | 175. 4683 |
| LIMD2         | 2. 385237 | 3. 215629 | 24. 63732 | 1. 17E-75  | 1. 74E-74  | 160. 3701 |
| RP11-51F16. 1 | 1. 102945 | 0. 727041 | 24. 10615 | 1. 07E-73  | 1. 49E-72  | 155. 8482 |
| CCDC47        | 1. 504892 | 4. 808806 | 21. 0019  | 5. 34E-62  | 5. 30E-61  | 128. 8812 |
| FTSJ3         | 1. 085553 | 3. 906435 | 17. 51477 | 1. 57E-48  | 1. 13E-47  | 97. 8575  |
| PSMC5         | 1. 60189  | 6. 143632 | 22. 09294 | 3. 75E-66  | 4. 16E-65  | 138. 4547 |
| CD79B         | 2. 048681 | 1. 611401 | 16. 06024 | 6. 77E-43  | 4. 33E-42  | 84. 88862 |
| PRR29         | 1. 000089 | 0. 873741 | 21. 38393 | 1. 86E-63  | 1. 91E-62  | 132. 2436 |
| ICAM2         | 2. 10311  | 3. 794159 | 29. 25885 | 4. 01E-92  | 1. 13E-90  | 198. 3461 |
| SNHG25        | -1. 36646 | 1. 587626 | -12. 3857 | 5. 21E-29  | 2. 52E-28  | 52. 9719  |
| PECAM1        | 2. 215566 | 3. 942479 | 23. 65795 | 4. 94E-72  | 6. 49E-71  | 152. 0098 |
| MILR1         | 2. 074098 | 1. 784424 | 25. 94184 | 2. 04E-80  | 3. 54E-79  | 171. 3443 |
| SMURF2        | 1. 351386 | 2. 637325 | 22. 569   | 5. 96E-68  | 6. 94E-67  | 142. 6018 |
| P13-104F24.   | 1. 370792 | 3. 062386 | 14. 4788  | 7. 92E-37  | 4. 48E-36  | 70. 93176 |
| GNA13         | 2. 119106 | 3. 067483 | 33. 14748 | 4. 32E-105 | 2. 43E-103 | 228. 2647 |
| RP11-16005. 1 | 1. 171701 | 1. 3007   | 25. 39119 | 2. 03E-78  | 3. 31E-77  | 166. 7352 |
| AXIN2         | 1. 391393 | 2. 066996 | 18. 57558 | 1. 20E-52  | 9. 47E-52  | 107. 3336 |
| PRKCA         | 1. 481013 | 2. 259008 | 24. 8085  | 2. 75E-76  | 4. 18E-75  | 161. 8209 |
| CACNG4        | 1. 796183 | 1. 071102 | 15. 85971 | 4. 02E-42  | 2. 53E-41  | 83. 10775 |

|               |           |           |           |            |            |           |
|---------------|-----------|-----------|-----------|------------|------------|-----------|
| PSMD12        | 1. 119501 | 3. 701305 | 18. 09769 | 8. 59E-51  | 6. 47E-50  | 103. 0655 |
| NOL11         | 1. 446484 | 3. 768908 | 26. 04726 | 8. 48E-81  | 1. 49E-79  | 172. 2227 |
| KPNA2         | 2. 920204 | 3. 410258 | 41. 95596 | 1. 58E-131 | 5. 18E-129 | 289. 2725 |
| AMZ2          | 1. 379049 | 4. 674939 | 22. 87834 | 4. 08E-69  | 4. 93E-68  | 145. 2858 |
| PRKAR1A       | 1. 756195 | 5. 265428 | 22. 54075 | 7. 61E-68  | 8. 86E-67  | 142. 3563 |
| FAM20A        | 2. 252334 | 2. 303953 | 24. 14373 | 7. 76E-74  | 1. 09E-72  | 156. 1692 |
| ABCA5         | -1. 62327 | 3. 830453 | -20. 9593 | 7. 78E-62  | 7. 67E-61  | 128. 5055 |
| SNRPGP4       | -1. 53562 | 1. 161996 | -20. 2181 | 5. 43E-59  | 4. 96E-58  | 121. 9526 |
| KCNJ16        | -1. 59425 | 2. 844246 | -12. 4103 | 4. 24E-29  | 2. 05E-28  | 53. 17836 |
| AC005152. 3   | -1. 80085 | 1. 66565  | -19. 7147 | 4. 72E-57  | 4. 13E-56  | 117. 4841 |
| LINC01152     | -1. 08738 | 1. 06637  | -22. 0043 | 8. 13E-66  | 8. 94E-65  | 137. 6801 |
| SOX9-AS1      | -1. 14265 | 2. 360874 | -14. 6269 | 2. 16E-37  | 1. 24E-36  | 72. 22872 |
| SOX9          | 1. 690557 | 4. 278226 | 21. 77778 | 5. 89E-65  | 6. 32E-64  | 135. 6988 |
| LINC00511     | 2. 797571 | 3. 208858 | 35. 06489 | 3. 49E-111 | 2. 84E-109 | 242. 3246 |
| TD-3010D24.   | 1. 048635 | 0. 629242 | 20. 3005  | 2. 62E-59  | 2. 41E-58  | 122. 6823 |
| SLC39A11      | 2. 081645 | 3. 692017 | 34. 53157 | 1. 65E-109 | 1. 21E-107 | 238. 4591 |
| FAM104A       | 1. 226629 | 3. 217237 | 24. 21251 | 4. 32E-74  | 6. 10E-73  | 156. 7561 |
| RPL38         | 1. 143785 | 9. 918737 | 11. 47473 | 9. 94E-26  | 4. 48E-25  | 45. 44764 |
| CD300A        | 2. 671323 | 2. 208192 | 34. 58716 | 1. 10E-109 | 8. 15E-108 | 238. 8637 |
| CD300C        | 1. 24857  | 0. 865038 | 24. 22514 | 3. 88E-74  | 5. 49E-73  | 156. 8638 |
| RAB37         | 1. 221956 | 1. 409507 | 16. 38034 | 3. 92E-44  | 2. 57E-43  | 87. 73611 |
| CD300LF       | 2. 092494 | 1. 300388 | 28. 47585 | 2. 06E-89  | 5. 07E-88  | 192. 0932 |
| RP11-452I5. 2 | 1. 070536 | 1. 639991 | 11. 332   | 3. 18E-25  | 1. 42E-24  | 44. 28957 |
| SLC9A3R1      | 1. 386862 | 5. 646181 | 17. 49946 | 1. 80E-48  | 1. 29E-47  | 97. 72072 |
| CDR2L         | 2. 958194 | 2. 760977 | 41. 54792 | 2. 19E-130 | 6. 37E-128 | 286. 6409 |
| ICT1          | 1. 142103 | 4. 027331 | 19. 64061 | 9. 13E-57  | 7. 93E-56  | 116. 8249 |
| KCTD2         | 1. 296212 | 3. 097288 | 24. 45796 | 5. 36E-75  | 7. 80E-74  | 158. 8466 |
| ATP5H         | 1. 620238 | 7. 123946 | 21. 82608 | 3. 86E-65  | 4. 16E-64  | 136. 1217 |
| SLC16A5       | 2. 589851 | 2. 69707  | 27. 88994 | 2. 31E-87  | 5. 17E-86  | 187. 3646 |
| ARMC7         | 1. 843072 | 2. 729339 | 36. 27352 | 6. 33E-115 | 6. 55E-113 | 250. 9573 |
| NT5C          | 1. 258417 | 5. 068474 | 13. 08771 | 1. 36E-31  | 6. 91E-31  | 58. 90636 |
| HN1           | 4. 752477 | 5. 39569  | 54. 47348 | 4. 18E-163 | 1. 81E-159 | 362. 1646 |
| SUM02         | 2. 374454 | 6. 740559 | 31. 77175 | 1. 35E-100 | 5. 82E-99  | 217. 8963 |
| NUP85         | 1. 034993 | 4. 482399 | 13. 74108 | 4. 90E-34  | 2. 62E-33  | 64. 51636 |
| MRPS7         | 1. 305308 | 4. 801447 | 21. 52756 | 5. 27E-64  | 5. 51E-63  | 133. 505  |
| SLC25A19      | 1. 209258 | 2. 727275 | 22. 06074 | 4. 97E-66  | 5. 49E-65  | 138. 1735 |
| GRB2          | 2. 09598  | 4. 597305 | 34. 61816 | 8. 80E-110 | 6. 55E-108 | 239. 0891 |
| MYO15B        | 1. 046168 | 5. 334764 | 9. 307331 | 2. 23E-18  | 8. 56E-18  | 28. 62186 |
| SMIM5         | 1. 39632  | 1. 709718 | 16. 59825 | 5. 62E-45  | 3. 75E-44  | 89. 67727 |
| SMIM6         | 1. 767075 | 2. 451043 | 22. 42974 | 2. 00E-67  | 2. 30E-66  | 141. 3907 |
| SAP30BP       | 1. 191205 | 5. 349201 | 18. 34552 | 9. 39E-52  | 7. 25E-51  | 105. 2793 |
| ITGB4         | 4. 807727 | 5. 36148  | 47. 5665  | 1. 87E-146 | 1. 85E-143 | 323. 7304 |
| H3F3B         | 1. 862668 | 8. 638355 | 18. 98231 | 3. 20E-54  | 2. 61E-53  | 110. 9625 |
| UNC13D        | 2. 351225 | 3. 528492 | 24. 077   | 1. 37E-73  | 1. 90E-72  | 155. 5993 |
| TRIM47        | 2. 6752   | 4. 458005 | 25. 41291 | 1. 69E-78  | 2. 77E-77  | 166. 9177 |
| TEN1          | 1. 01045  | 4. 118291 | 15. 78143 | 8. 06E-42  | 5. 04E-41  | 82. 41319 |
| EVPL          | 2. 935659 | 2. 468113 | 31. 96417 | 3. 12E-101 | 1. 39E-99  | 219. 3607 |
| P11-449J21.   | -1. 10453 | 2. 146241 | -16. 1364 | 3. 44E-43  | 2. 21E-42  | 85. 56596 |
| FOXJ1         | 1. 613798 | 1. 069806 | 14. 9218  | 1. 62E-38  | 9. 48E-38  | 74. 81782 |
| UBALD2        | 2. 353064 | 5. 169255 | 27. 81137 | 4. 36E-87  | 9. 65E-86  | 186. 7273 |
| SPHK1         | 1. 975277 | 3. 75958  | 21. 03442 | 4. 01E-62  | 3. 99E-61  | 129. 1678 |
| RHBDF2        | 1. 397977 | 4. 144722 | 18. 1575  | 5. 04E-51  | 3. 81E-50  | 103. 5999 |
| CYGB          | 2. 117298 | 3. 526045 | 24. 63951 | 1. 15E-75  | 1. 71E-74  | 160. 3887 |
| ST6GALNAC1    | 4. 129678 | 2. 550246 | 36. 48133 | 1. 47E-115 | 1. 57E-113 | 252. 4239 |

|               |           |           |           |            |            |           |
|---------------|-----------|-----------|-----------|------------|------------|-----------|
| MXRA7         | 1. 685041 | 5. 413021 | 18. 27452 | 1. 77E-51  | 1. 36E-50  | 104. 6452 |
| JMJD6         | 1. 150092 | 4. 305784 | 16. 78589 | 1. 05E-45  | 7. 15E-45  | 91. 3503  |
| MFS11         | 1. 468498 | 3. 347358 | 26. 30095 | 1. 03E-81  | 1. 87E-80  | 174. 3313 |
| SEC14L1       | 1. 263009 | 4. 189015 | 18. 99136 | 2. 95E-54  | 2. 41E-53  | 111. 0432 |
| 9-Sep         | 3. 142443 | 5. 501258 | 40. 65931 | 7. 08E-128 | 1. 65E-125 | 280. 8477 |
| TNRC6C-AS1    | 1. 099679 | 2. 219336 | 15. 60832 | 3. 75E-41  | 2. 31E-40  | 80. 87879 |
| TMC6          | 2. 262098 | 4. 398668 | 26. 67088 | 4. 86E-83  | 9. 27E-82  | 177. 3925 |
| TMC8          | 1. 919347 | 1. 908189 | 22. 0843  | 4. 04E-66  | 4. 48E-65  | 138. 3793 |
| SYNGR2        | 1. 754182 | 7. 003877 | 22. 03061 | 6. 46E-66  | 7. 12E-65  | 137. 9103 |
| TK1           | 3. 079941 | 3. 014456 | 39. 29101 | 6. 15E-124 | 1. 08E-121 | 271. 7576 |
| BIRC5         | 2. 55228  | 1. 718954 | 24. 50955 | 3. 46E-75  | 5. 07E-74  | 159. 2851 |
| SOCS3         | 2. 544395 | 4. 422532 | 19. 51854 | 2. 70E-56  | 2. 32E-55  | 115. 739  |
| CYTH1         | 1. 37831  | 4. 502842 | 18. 18313 | 4. 01E-51  | 3. 04E-50  | 103. 8289 |
| TIMP2         | 2. 941843 | 6. 237615 | 29. 86226 | 3. 44E-94  | 1. 07E-92  | 203. 1127 |
| LGALS3BP      | 4. 047444 | 6. 70139  | 43. 72483 | 2. 21E-136 | 1. 05E-133 | 300. 4778 |
| CANT1         | 2. 278386 | 4. 191915 | 31. 59957 | 5. 00E-100 | 2. 09E-98  | 216. 5821 |
| C1QTNF1       | 2. 576337 | 3. 791964 | 27. 85642 | 3. 03E-87  | 6. 75E-86  | 187. 0928 |
| CBX8          | 1. 078777 | 1. 703038 | 22. 71775 | 1. 64E-68  | 1. 95E-67  | 143. 8935 |
| P11-353N14.   | 1. 241784 | 0. 985068 | 17. 70537 | 2. 86E-49  | 2. 09E-48  | 99. 56041 |
| GAA           | 1. 298473 | 4. 699697 | 17. 72351 | 2. 43E-49  | 1. 78E-48  | 99. 72244 |
| EIF4A3        | 1. 828951 | 4. 791069 | 28. 01704 | 8. 26E-88  | 1. 89E-86  | 188. 394  |
| RNF213        | 1. 409867 | 4. 902119 | 17. 42747 | 3. 43E-48  | 2. 44E-47  | 97. 07761 |
| NPTX1         | 1. 794855 | 0. 991259 | 22. 8889  | 3. 72E-69  | 4. 51E-68  | 145. 3772 |
| RPTOR         | 1. 145844 | 2. 483451 | 24. 47252 | 4. 73E-75  | 6. 90E-74  | 158. 9704 |
| CHMP6         | 1. 25684  | 3. 582796 | 21. 82655 | 3. 84E-65  | 4. 15E-64  | 136. 1258 |
| BAIAP2-AS1    | 1. 614357 | 2. 095499 | 29. 74405 | 8. 71E-94  | 2. 66E-92  | 202. 1825 |
| BAIAP2        | 2. 966964 | 3. 767978 | 37. 72582 | 2. 55E-119 | 3. 43E-117 | 261. 1003 |
| CEP131        | 1. 090744 | 2. 626329 | 15. 87754 | 3. 43E-42  | 2. 17E-41  | 83. 26595 |
| C17orf89      | 1. 017321 | 4. 970693 | 15. 35718 | 3. 46E-40  | 2. 10E-39  | 78. 65684 |
| TMEM105       | 1. 508587 | 0. 771898 | 26. 03653 | 9. 27E-81  | 1. 63E-79  | 172. 1334 |
| P11-1055B8.   | -1. 02368 | 1. 644803 | -13. 1445 | 8. 34E-32  | 4. 28E-31  | 59. 39128 |
| ACTG1         | 1. 720289 | 10. 26238 | 14. 42685 | 1. 25E-36  | 7. 03E-36  | 70. 47759 |
| FSCN2         | -1. 01283 | 1. 426596 | -15. 6746 | 2. 08E-41  | 1. 29E-40  | 81. 46578 |
| NPLOC4        | 1. 049703 | 4. 387543 | 16. 14683 | 3. 13E-43  | 2. 02E-42  | 85. 65841 |
| PDE6G         | 1. 312373 | 0. 843037 | 14. 40174 | 1. 56E-36  | 8. 73E-36  | 70. 25815 |
| OXLD1         | 1. 072795 | 4. 137241 | 14. 18467 | 1. 04E-35  | 5. 72E-35  | 68. 36477 |
| CCDC137       | 1. 33163  | 3. 215985 | 19. 85177 | 1. 40E-57  | 1. 24E-56  | 118. 7016 |
| HGS           | 1. 107151 | 5. 730831 | 14. 26661 | 5. 07E-36  | 2. 81E-35  | 69. 07876 |
| MRPL12        | 1. 272098 | 5. 093805 | 17. 67323 | 3. 81E-49  | 2. 78E-48  | 99. 27317 |
| FAM195B       | 1. 212336 | 5. 69635  | 15. 24458 | 9. 37E-40  | 5. 62E-39  | 77. 6623  |
| RP11-498C9. 5 | 1. 099176 | 0. 887618 | 6. 843229 | 4. 00E-11  | 1. 27E-10  | 12. 11452 |
| ARHGDI1       | 1. 633615 | 7. 057094 | 20. 27406 | 3. 31E-59  | 3. 04E-58  | 122. 4481 |
| ALYREF        | 2. 245227 | 4. 711394 | 34. 18313 | 2. 09E-108 | 1. 43E-106 | 235. 915  |
| ANAPC11       | 1. 677424 | 6. 136699 | 24. 30595 | 1. 95E-74  | 2. 78E-73  | 157. 5527 |
| PCYT2         | 1. 300538 | 4. 079235 | 18. 8521  | 1. 02E-53  | 8. 24E-53  | 109. 8012 |
| SIRT7         | 1. 089949 | 4. 126065 | 15. 19942 | 1. 40E-39  | 8. 35E-39  | 77. 26373 |
| MAFG          | 1. 156457 | 2. 755106 | 18. 81097 | 1. 47E-53  | 1. 18E-52  | 109. 4342 |
| MAFG-AS1      | 1. 091122 | 1. 475921 | 24. 11371 | 1. 00E-73  | 1. 40E-72  | 155. 9128 |
| P11-498C9. 1  | 1. 735949 | 1. 251536 | 12. 59257 | 9. 12E-30  | 4. 47E-29  | 54. 70963 |
| NOTUM         | 1. 014406 | 0. 661558 | 13. 55557 | 2. 44E-33  | 1. 29E-32  | 62. 91592 |
| STRA13        | 1. 555869 | 4. 682173 | 22. 44424 | 1. 76E-67  | 2. 03E-66  | 141. 5169 |
| RAC3          | 1. 312785 | 2. 086518 | 18. 41635 | 4. 99E-52  | 3. 87E-51  | 105. 9119 |
| GPS1          | 1. 095178 | 5. 307292 | 17. 44092 | 3. 04E-48  | 2. 17E-47  | 97. 19782 |
| FASN          | 1. 447411 | 4. 713102 | 14. 78838 | 5. 23E-38  | 3. 04E-37  | 73. 64517 |

|              |           |           |           |            |            |           |
|--------------|-----------|-----------|-----------|------------|------------|-----------|
| CCDC57       | 1. 023473 | 4. 563218 | 13. 69265 | 7. 45E-34  | 3. 97E-33  | 64. 09799 |
| SLC16A3      | 5. 06554  | 4. 114624 | 47. 65423 | 1. 12E-146 | 1. 17E-143 | 324. 2449 |
| CD7          | 2. 216387 | 1. 654415 | 26. 59046 | 9. 44E-83  | 1. 78E-81  | 176. 7285 |
| SECTM1       | 2. 300582 | 2. 423161 | 23. 94117 | 4. 38E-73  | 5. 95E-72  | 154. 4378 |
| C17orf62     | 1. 328549 | 5. 176693 | 17. 60581 | 6. 96E-49  | 5. 04E-48  | 98. 67085 |
| NARF         | 1. 119133 | 4. 784995 | 14. 75543 | 6. 99E-38  | 4. 05E-37  | 73. 35586 |
| WDR45B       | 1. 002122 | 5. 285256 | 12. 87803 | 8. 11E-31  | 4. 07E-30  | 57. 12296 |
| RAB40B       | 1. 217903 | 2. 963119 | 18. 83026 | 1. 24E-53  | 1. 00E-52  | 109. 6063 |
| FN3KRP       | 1. 471034 | 3. 894242 | 25. 6936  | 1. 62E-79  | 2. 72E-78  | 169. 2708 |
| TBCD         | 1. 210724 | 5. 417805 | 17. 79901 | 1. 24E-49  | 9. 13E-49  | 100. 397  |
| B3GNTL1      | 1. 380096 | 2. 281389 | 26. 03989 | 9. 02E-81  | 1. 58E-79  | 172. 1614 |
| METRNL       | 2. 470802 | 4. 499871 | 28. 69772 | 3. 48E-90  | 8. 97E-89  | 193. 8727 |
| USP14        | 1. 595581 | 3. 521668 | 25. 3448  | 3. 00E-78  | 4. 86E-77  | 166. 3454 |
| COLEC12      | 1. 813314 | 1. 603213 | 18. 49138 | 2. 55E-52  | 1. 99E-51  | 106. 5818 |
| TYMS         | 2. 161877 | 3. 092314 | 28. 64519 | 5. 30E-90  | 1. 35E-88  | 193. 4519 |
| YES1         | 1. 376562 | 3. 391067 | 21. 20178 | 9. 20E-63  | 9. 32E-62  | 130. 6417 |
| METTL4       | 1. 367769 | 2. 014613 | 26. 33389 | 7. 86E-82  | 1. 44E-80  | 174. 6046 |
| NDC80        | 2. 340088 | 1. 324517 | 40. 67262 | 6. 49E-128 | 1. 52E-125 | 280. 9351 |
| EMILIN2      | 2. 504707 | 2. 362948 | 36. 76492 | 2. 01E-116 | 2. 27E-114 | 254. 4171 |
| LPIN2        | 1. 565533 | 3. 189972 | 19. 34296 | 1. 29E-55  | 1. 09E-54  | 114. 1762 |
| MYL12A       | 2. 760335 | 7. 728603 | 30. 41223 | 4. 69E-96  | 1. 60E-94  | 207. 4176 |
| MYL12B       | 2. 831926 | 7. 638945 | 33. 2138  | 2. 64E-105 | 1. 50E-103 | 228. 7586 |
| TGIF1        | 2. 399564 | 4. 903585 | 30. 62061 | 9. 29E-97  | 3. 29E-95  | 209. 0387 |
| GAPLINC      | 1. 80067  | 0. 922554 | 31. 93406 | 3. 92E-101 | 1. 73E-99  | 219. 1319 |
| DLGAP1-AS1   | 1. 851322 | 2. 554717 | 24. 1025  | 1. 10E-73  | 1. 54E-72  | 155. 8171 |
| DLGAP1-AS2   | 1. 10806  | 1. 251741 | 17. 76664 | 1. 65E-49  | 1. 22E-48  | 100. 1078 |
| EPB41L3      | 1. 489145 | 2. 601508 | 16. 82696 | 7. 31E-46  | 4. 97E-45  | 91. 71665 |
| PTPRM        | 1. 215529 | 3. 835558 | 17. 36    | 6. 26E-48  | 4. 44E-47  | 96. 47495 |
| RAB12        | 1. 554896 | 3. 630633 | 24. 39795 | 8. 92E-75  | 1. 29E-73  | 158. 336  |
| NDUFV2       | 1. 474221 | 6. 064707 | 21. 17519 | 1. 16E-62  | 1. 17E-61  | 130. 4076 |
| TWSG1        | 2. 609292 | 2. 724179 | 37. 31574 | 4. 33E-118 | 5. 40E-116 | 258. 2614 |
| RALBP1       | 2. 319154 | 3. 708506 | 37. 46176 | 1. 58E-118 | 2. 04E-116 | 259. 2745 |
| PPP4R1       | 1. 53386  | 4. 318934 | 22. 15204 | 2. 24E-66  | 2. 50E-65  | 138. 9706 |
| RAB31        | 3. 765729 | 3. 421915 | 38. 27079 | 6. 09E-121 | 9. 08E-119 | 264. 8429 |
| VAPA         | 1. 437095 | 6. 228013 | 18. 08373 | 9. 73E-51  | 7. 32E-50  | 102. 9409 |
| APCDD1       | 2. 092081 | 3. 34499  | 21. 60738 | 2. 62E-64  | 2. 76E-63  | 134. 2054 |
| NAPG         | 1. 224015 | 3. 153036 | 21. 62457 | 2. 25E-64  | 2. 38E-63  | 134. 3561 |
| CHMP1B       | 2. 133775 | 3. 902219 | 33. 47403 | 3. 84E-106 | 2. 29E-104 | 230. 6912 |
| RP11-78A19.5 | 3. 059729 | 2. 499508 | 33. 33567 | 1. 07E-105 | 6. 21E-104 | 229. 6647 |
| IMPA2        | -1. 48595 | 6. 410319 | -15. 2618 | 8. 05E-40  | 4. 84E-39  | 77. 81472 |
| SDHDP1       | -1. 123   | 0. 653306 | -29. 8032 | 5. 47E-94  | 1. 69E-92  | 202. 6481 |
| RP11-64C12.5 | -1. 09338 | 0. 599244 | -34. 2248 | 1. 54E-108 | 1. 06E-106 | 236. 2202 |
| RP11-64C12.5 | -2. 76368 | 1. 787786 | -42. 9166 | 3. 52E-134 | 1. 47E-131 | 295. 3982 |
| TUBB6        | 1. 981403 | 5. 150429 | 26. 18533 | 2. 69E-81  | 4. 81E-80  | 173. 3712 |
| AFG3L2       | 1. 184511 | 4. 01891  | 18. 86611 | 9. 02E-54  | 7. 28E-53  | 109. 9261 |
| SPIRE1       | 1. 401947 | 2. 407676 | 19. 41968 | 6. 51E-56  | 5. 54E-55  | 114. 8592 |
| PSMG2        | 1. 482872 | 5. 300222 | 22. 12722 | 2. 78E-66  | 3. 10E-65  | 138. 754  |
| SEH1L        | 1. 178712 | 3. 189934 | 22. 00395 | 8. 15E-66  | 8. 96E-65  | 137. 6774 |
| LDLRAD4      | 2. 12297  | 1. 87082  | 32. 80609 | 5. 51E-104 | 2. 90E-102 | 225. 7138 |
| FAM210A      | 1. 341239 | 1. 947809 | 23. 43576 | 3. 33E-71  | 4. 28E-70  | 150. 0995 |
| RNMT         | 1. 122391 | 3. 033564 | 22. 32987 | 4. 76E-67  | 5. 42E-66  | 140. 5212 |
| ANKRD20A5P   | -1. 17607 | 1. 664028 | -16. 1273 | 3. 73E-43  | 2. 40E-42  | 85. 48507 |
| ROCK1        | 1. 220975 | 2. 907949 | 18. 15143 | 5. 32E-51  | 4. 02E-50  | 103. 5457 |
| ESCO1        | 1. 581451 | 2. 672722 | 29. 94299 | 1. 83E-94  | 5. 76E-93  | 203. 747  |



|               |           |           |           |            |            |           |
|---------------|-----------|-----------|-----------|------------|------------|-----------|
| SNRPD1        | 2. 832305 | 4. 890077 | 41. 48665 | 3. 25E-130 | 9. 28E-128 | 286. 2441 |
| ABHD3         | 1. 63075  | 3. 36309  | 21. 98605 | 9. 53E-66  | 1. 04E-64  | 137. 521  |
| MIB1          | 1. 205847 | 2. 377721 | 20. 66166 | 1. 07E-60  | 1. 03E-59  | 125. 8781 |
| RBBP8         | 1. 466802 | 3. 486112 | 23. 52679 | 1. 52E-71  | 1. 97E-70  | 150. 8828 |
| CABLES1       | 1. 890999 | 2. 116399 | 29. 31739 | 2. 52E-92  | 7. 15E-91  | 198. 8105 |
| RIOK3         | 1. 551398 | 4. 809309 | 19. 44226 | 5. 33E-56  | 4. 54E-55  | 115. 0603 |
| C18orf8       | 1. 563169 | 3. 943952 | 24. 42627 | 7. 01E-75  | 1. 02E-73  | 158. 577  |
| NPC1          | 1. 804867 | 3. 75795  | 25. 48058 | 9. 60E-79  | 1. 58E-77  | 167. 4858 |
| ANKRD29       | 1. 669994 | 1. 409882 | 22. 74343 | 1. 31E-68  | 1. 56E-67  | 144. 1163 |
| LAMA3         | 4. 92838  | 3. 828451 | 49. 95145 | 2. 09E-152 | 3. 42E-149 | 337. 4662 |
| CABYR         | 1. 172468 | 1. 046538 | 22. 98202 | 1. 66E-69  | 2. 03E-68  | 146. 1833 |
| OSBPL1A       | 1. 341593 | 3. 192682 | 18. 21459 | 3. 02E-51  | 2. 30E-50  | 104. 1098 |
| IMPACT        | 1. 333009 | 2. 82046  | 23. 92279 | 5. 12E-73  | 6. 95E-72  | 154. 2805 |
| ZNF521        | 1. 902951 | 1. 49993  | 24. 6057  | 1. 53E-75  | 2. 27E-74  | 160. 1017 |
| SS18          | 1. 093905 | 4. 273114 | 17. 53503 | 1. 31E-48  | 9. 43E-48  | 98. 03853 |
| DHFRP1        | 1. 85474  | 1. 112066 | 26. 30761 | 9. 78E-82  | 1. 78E-80  | 174. 3865 |
| KCTD1         | 1. 760167 | 2. 741341 | 27. 54299 | 3. 85E-86  | 8. 22E-85  | 184. 5448 |
| CDH2          | 1. 816287 | 1. 177148 | 17. 65866 | 4. 34E-49  | 3. 16E-48  | 99. 14303 |
| DSC2          | 1. 756697 | 2. 695359 | 24. 60393 | 1. 55E-75  | 2. 30E-74  | 160. 0867 |
| DSG3          | 1. 431467 | 0. 748431 | 12. 92282 | 5. 54E-31  | 2. 79E-30  | 57. 5032  |
| DSG2          | 2. 486788 | 4. 030726 | 28. 61704 | 6. 64E-90  | 1. 68E-88  | 193. 2263 |
| RNF138        | 1. 165534 | 2. 625822 | 19. 99665 | 3. 87E-58  | 3. 46E-57  | 119. 988  |
| DTNA          | -1. 4039  | 2. 720578 | -18. 5448 | 1. 59E-52  | 1. 24E-51  | 107. 0585 |
| MAPRE2        | 1. 679475 | 3. 086085 | 26. 7882  | 1. 85E-83  | 3. 58E-82  | 178. 36   |
| ZNF271P       | 1. 02442  | 2. 148    | 21. 66532 | 1. 58E-64  | 1. 67E-63  | 134. 7134 |
| INOSOC        | 1. 501107 | 3. 422623 | 26. 37068 | 5. 80E-82  | 1. 06E-80  | 174. 9095 |
| GALNT1        | 1. 978746 | 3. 795574 | 30. 79973 | 2. 32E-97  | 8. 48E-96  | 210. 4279 |
| SLC39A6       | 1. 288436 | 3. 559154 | 18. 77299 | 2. 07E-53  | 1. 65E-52  | 109. 0954 |
| RP11-49I11. 1 | 1. 772194 | 1. 523624 | 26. 9229  | 6. 12E-84  | 1. 20E-82  | 179. 4687 |
| MOCOS         | 1. 471365 | 1. 290816 | 27. 99865 | 9. 59E-88  | 2. 18E-86  | 188. 2452 |
| FHOD3         | 1. 846269 | 1. 464713 | 19. 24301 | 3. 14E-55  | 2. 63E-54  | 113. 286  |
| TPGS2         | 1. 250867 | 4. 465379 | 19. 62722 | 1. 03E-56  | 8. 92E-56  | 116. 7058 |
| PIK3C3        | 1. 252206 | 3. 790831 | 21. 75528 | 7. 17E-65  | 7. 68E-64  | 135. 5018 |
| HAUS1         | 1. 399418 | 3. 10466  | 25. 98804 | 1. 39E-80  | 2. 42E-79  | 171. 7295 |
| IER3IP1       | 1. 22429  | 2. 977674 | 26. 19153 | 2. 56E-81  | 4. 58E-80  | 173. 4228 |
| SMAD2         | 1. 443762 | 4. 179844 | 19. 85595 | 1. 35E-57  | 1. 19E-56  | 118. 7387 |
| ZBTB7C        | 1. 966317 | 1. 303686 | 28. 37935 | 4. 47E-89  | 1. 08E-87  | 191. 3173 |
| CTIF          | 1. 154319 | 3. 100195 | 18. 81934 | 1. 37E-53  | 1. 10E-52  | 109. 5089 |
| SMAD7         | 1. 798953 | 3. 096865 | 24. 24632 | 3. 24E-74  | 4. 59E-73  | 157. 0445 |
| PL17-C18orf1  | 1. 423811 | 2. 902147 | 13. 94849 | 8. 11E-35  | 4. 40E-34  | 66. 31212 |
| LIPG          | 2. 237139 | 1. 749194 | 27. 91982 | 1. 81E-87  | 4. 07E-86  | 187. 6068 |
| ACAA2         | 1. 244343 | 4. 985503 | 17. 58134 | 8. 66E-49  | 6. 26E-48  | 98. 45226 |
| MYO5B         | 1. 934812 | 3. 489641 | 26. 79992 | 1. 68E-83  | 3. 26E-82  | 178. 4565 |
| MEX3C         | 1. 447822 | 2. 847269 | 21. 49849 | 6. 80E-64  | 7. 08E-63  | 133. 2498 |
| SNRPGP2       | 2. 579847 | 2. 280313 | 31. 34545 | 3. 49E-99  | 1. 39E-97  | 214. 6355 |
| RAB27B        | 1. 648946 | 1. 773657 | 23. 66604 | 4. 61E-72  | 6. 06E-71  | 152. 0793 |
| CCDC68        | 1. 228771 | 1. 647588 | 18. 33801 | 1. 00E-51  | 7. 74E-51  | 105. 2122 |
| TCF4          | 1. 922796 | 2. 61877  | 22. 41296 | 2. 31E-67  | 2. 65E-66  | 141. 2447 |
| ONECUT2       | 1. 364867 | 1. 472955 | 15. 66187 | 2. 33E-41  | 1. 44E-40  | 81. 35326 |
| ZNF532        | 1. 96263  | 2. 918411 | 25. 30451 | 4. 21E-78  | 6. 79E-77  | 166. 0066 |
| GRP           | 2. 510099 | 1. 747877 | 19. 29254 | 2. 02E-55  | 1. 70E-54  | 113. 7272 |
| PMAIP1        | 2. 202412 | 1. 527336 | 30. 43807 | 3. 83E-96  | 1. 32E-94  | 207. 6189 |
| TNFRSF11A     | 1. 899744 | 1. 620073 | 24. 84227 | 2. 07E-76  | 3. 16E-75  | 162. 1067 |
| KDSR          | 1. 471424 | 3. 598295 | 21. 51395 | 5. 93E-64  | 6. 19E-63  | 133. 3856 |

|              |           |           |           |            |            |           |
|--------------|-----------|-----------|-----------|------------|------------|-----------|
| VPS4B        | 1. 353438 | 3. 457442 | 22. 96189 | 1. 98E-69  | 2. 41E-68  | 146. 0091 |
| SERPINB5     | 4. 398591 | 2. 205545 | 43. 78042 | 1. 57E-136 | 7. 58E-134 | 300. 8247 |
| SERPINB4     | 1. 039399 | 0. 52313  | 11. 72231 | 1. 30E-26  | 5. 99E-26  | 47. 47057 |
| SERPINB3     | 2. 092732 | 1. 109451 | 13. 84319 | 2. 02E-34  | 1. 09E-33  | 65. 3996  |
| SERPINB7     | 1. 497305 | 0. 760188 | 17. 54149 | 1. 24E-48  | 8. 91E-48  | 98. 09619 |
| SERPINB2     | 2. 143408 | 1. 439372 | 19. 04434 | 1. 84E-54  | 1. 51E-53  | 111. 5156 |
| SERPINB8     | 2. 059013 | 2. 298224 | 32. 4183  | 1. 01E-102 | 4. 91E-101 | 222. 7985 |
| CCDC102B     | 1. 418055 | 1. 483073 | 21. 99297 | 8. 97E-66  | 9. 85E-65  | 137. 5814 |
| SOCS6        | 1. 590378 | 2. 413658 | 26. 30672 | 9. 85E-82  | 1. 79E-80  | 174. 3792 |
| CNDP2        | 1. 408486 | 5. 972326 | 19. 48016 | 3. 80E-56  | 3. 25E-55  | 115. 3975 |
| TSHZ1        | 1. 126345 | 2. 23893  | 19. 33076 | 1. 44E-55  | 1. 21E-54  | 114. 0675 |
| NFATC1       | 1. 662317 | 2. 189227 | 22. 59048 | 4. 94E-68  | 5. 78E-67  | 142. 7885 |
| PPAP2C       | 2. 744642 | 5. 221541 | 31. 39315 | 2. 42E-99  | 9. 73E-98  | 215. 0015 |
| MIER2        | 1. 358104 | 3. 346801 | 22. 6295  | 3. 52E-68  | 4. 14E-67  | 143. 1274 |
| SHC2         | -1. 55836 | 5. 49285  | -13. 8747 | 1. 54E-34  | 8. 31E-34  | 65. 67273 |
| GZMM         | 1. 271949 | 0. 833478 | 17. 42288 | 3. 57E-48  | 2. 55E-47  | 97. 03665 |
| AC009005. 2  | 1. 188275 | 1. 006834 | 21. 40817 | 1. 50E-63  | 1. 55E-62  | 132. 4567 |
| BSG          | 2. 207921 | 7. 766671 | 28. 17675 | 2. 28E-88  | 5. 34E-87  | 189. 6846 |
| POLRMT       | 1. 477637 | 4. 602052 | 20. 41248 | 9. 72E-60  | 9. 07E-59  | 123. 6741 |
| RNF126       | 1. 104343 | 4. 318888 | 15. 99836 | 1. 17E-42  | 7. 47E-42  | 84. 33882 |
| FSTL3        | 2. 002937 | 4. 940847 | 16. 15064 | 3. 03E-43  | 1. 95E-42  | 85. 69227 |
| PALM         | 1. 772528 | 2. 581692 | 21. 61524 | 2. 44E-64  | 2. 58E-63  | 134. 2743 |
| MISP         | 5. 36416  | 2. 936418 | 59. 83556 | 6. 71E-175 | 6. 76E-171 | 389. 3899 |
| PTBP1        | 1. 417191 | 6. 077381 | 20. 93818 | 9. 37E-62  | 9. 22E-61  | 128. 3193 |
| R3HDM4       | 1. 892199 | 5. 311295 | 23. 86887 | 8. 12E-73  | 1. 10E-71  | 153. 8187 |
| WDR18        | 1. 097396 | 4. 146484 | 15. 34292 | 3. 93E-40  | 2. 38E-39  | 78. 53085 |
| CNN2         | 2. 275116 | 5. 824697 | 28. 23511 | 1. 42E-88  | 3. 37E-87  | 190. 1554 |
| AC011558. 5  | 2. 960859 | 5. 164219 | 24. 71945 | 5. 84E-76  | 8. 76E-75  | 161. 0666 |
| HMHA1        | 2. 123881 | 3. 548382 | 26. 08312 | 6. 30E-81  | 1. 11E-79  | 172. 5212 |
| POLR2E       | 1. 807899 | 5. 937025 | 27. 00473 | 3. 13E-84  | 6. 22E-83  | 180. 1413 |
| GPX4         | 2. 693769 | 7. 028738 | 34. 27002 | 1. 11E-108 | 7. 74E-107 | 236. 5508 |
| SBNO2        | 1. 906128 | 4. 316793 | 24. 93144 | 9. 73E-77  | 1. 50E-75  | 162. 8609 |
| MIDN         | 1. 611501 | 4. 766584 | 16. 72412 | 1. 83E-45  | 1. 24E-44  | 90. 79942 |
| C19orf24     | 1. 452592 | 5. 123882 | 19. 76889 | 2. 92E-57  | 2. 57E-56  | 117. 9652 |
| EFNA2        | 1. 735302 | 0. 855541 | 20. 00599 | 3. 56E-58  | 3. 19E-57  | 120. 0709 |
| NDUFS7       | 1. 049934 | 5. 68933  | 13. 39138 | 1. 00E-32  | 5. 23E-32  | 61. 50431 |
| GAMT         | -1. 92597 | 5. 141216 | -19. 385  | 8. 86E-56  | 7. 50E-55  | 114. 5508 |
| C19orf25     | 1. 112643 | 3. 772298 | 17. 43785 | 3. 12E-48  | 2. 23E-47  | 97. 17042 |
| ADAMTSL5     | 1. 65928  | 1. 272203 | 24. 39225 | 9. 36E-75  | 1. 35E-73  | 158. 2876 |
| MEX3D        | 1. 736872 | 2. 557176 | 28. 6631  | 4. 60E-90  | 1. 18E-88  | 193. 5954 |
| MBD3         | 1. 003861 | 4. 600623 | 13. 48274 | 4. 57E-33  | 2. 40E-32  | 62. 2892  |
| AC005943. 6  | 1. 892402 | 1. 575402 | 9. 702336 | 1. 16E-19  | 4. 61E-19  | 31. 55327 |
| AC005943. 2  | 1. 406744 | 1. 028643 | 11. 6548  | 2. 27E-26  | 1. 04E-25  | 46. 9172  |
| UQCR11       | 1. 992248 | 6. 305831 | 29. 10684 | 1. 34E-91  | 3. 69E-90  | 197. 1381 |
| TCF3         | 1. 787008 | 4. 550003 | 28. 56551 | 1. 00E-89  | 2. 51E-88  | 192. 813  |
| ONECUT3      | 1. 735723 | 0. 846999 | 19. 3254  | 1. 51E-55  | 1. 27E-54  | 114. 0199 |
| CTB-31020. 3 | 2. 278972 | 1. 556888 | 20. 68895 | 8. 44E-61  | 8. 12E-60  | 126. 1192 |
| CTB-31020. 6 | 1. 378587 | 2. 375585 | 10. 84679 | 1. 58E-23  | 6. 82E-23  | 40. 3998  |
| KLF16        | 2. 279632 | 2. 796127 | 34. 88447 | 1. 28E-110 | 9. 96E-109 | 241. 0208 |
| SCAMP4       | 1. 119325 | 4. 733861 | 17. 5418  | 1. 23E-48  | 8. 88E-48  | 98. 09896 |
| CSNK1G2      | 1. 011179 | 4. 798289 | 15. 17338 | 1. 76E-39  | 1. 05E-38  | 77. 03397 |
| MOB3A        | 1. 759864 | 3. 436133 | 27. 61009 | 2. 23E-86  | 4. 82E-85  | 185. 0913 |
| IZUMO4       | -1. 15108 | 2. 778287 | -14. 7781 | 5. 73E-38  | 3. 32E-37  | 73. 55501 |
| JSRP1        | 1. 370461 | 1. 160379 | 15. 84676 | 4. 51E-42  | 2. 84E-41  | 82. 99281 |

|              |          |          |          |           |           |          |
|--------------|----------|----------|----------|-----------|-----------|----------|
| OAZ1         | 1.339425 | 8.874325 | 15.46187 | 1.37E-40  | 8.37E-40  | 79.58245 |
| LSM7         | 2.068728 | 5.70458  | 25.67896 | 1.83E-79  | 3.08E-78  | 169.1483 |
| LMNB2        | 2.107736 | 3.127971 | 34.79892 | 2.38E-110 | 1.82E-108 | 240.4012 |
| GADD45B      | 1.117352 | 5.477078 | 8.170735 | 7.37E-15  | 2.60E-14  | 20.59569 |
| SLC39A3      | 1.722839 | 3.870825 | 32.49449 | 5.69E-103 | 2.82E-101 | 223.3728 |
| THOP1        | 1.178093 | 4.08666  | 18.25974 | 2.02E-51  | 1.54E-50  | 104.5131 |
| AC005944.2   | 2.617304 | 2.836629 | 21.99552 | 8.78E-66  | 9.63E-65  | 137.6037 |
| AES          | 1.42036  | 8.098667 | 16.94172 | 2.62E-46  | 1.80E-45  | 92.74049 |
| GNA11        | 1.291134 | 4.259063 | 20.46888 | 5.90E-60  | 5.54E-59  | 124.1733 |
| GNA15        | 3.612508 | 2.269333 | 49.67714 | 9.86E-152 | 1.53E-148 | 335.9123 |
| S1PR4        | 1.789617 | 1.225583 | 23.9012  | 6.16E-73  | 8.34E-72  | 154.0956 |
| SMIM24       | 4.002604 | 3.450272 | 27.36271 | 1.67E-85  | 3.48E-84  | 183.0738 |
| DOHH         | 1.087409 | 2.761371 | 19.52869 | 2.47E-56  | 2.12E-55  | 115.8294 |
| FZR1         | 1.388316 | 3.926915 | 22.49506 | 1.13E-67  | 1.31E-66  | 141.959  |
| AC005786.7   | 2.350931 | 1.925299 | 19.08515 | 1.28E-54  | 1.06E-53  | 111.8793 |
| HMG20B       | 1.376109 | 4.953336 | 19.74705 | 3.54E-57  | 3.11E-56  | 117.7711 |
| PIP5K1C      | 1.073722 | 3.433874 | 18.9053  | 6.36E-54  | 5.15E-53  | 110.2757 |
| TJP3         | 2.786807 | 3.89147  | 28.04918 | 6.38E-88  | 1.46E-86  | 188.6539 |
| MRPL54       | 1.051273 | 5.46451  | 15.54478 | 6.58E-41  | 4.03E-40  | 80.31618 |
| MATK         | 1.151603 | 1.06221  | 18.12967 | 6.46E-51  | 4.88E-50  | 103.3513 |
| DAPK3        | 1.755657 | 4.814664 | 25.92174 | 2.41E-80  | 4.17E-79  | 171.1767 |
| ZBTB7A       | 1.888702 | 3.038902 | 33.1007  | 6.12E-105 | 3.40E-103 | 227.916  |
| EBI3         | 1.202959 | 1.119189 | 16.45077 | 2.09E-44  | 1.38E-43  | 88.36332 |
| STAP2        | 1.771404 | 4.738657 | 21.47538 | 8.32E-64  | 8.66E-63  | 133.0469 |
| MPND         | 1.290396 | 3.675479 | 25.37641 | 2.30E-78  | 3.75E-77  | 166.6111 |
| SH3GL1       | 1.613991 | 4.717768 | 25.01936 | 4.63E-77  | 7.19E-76  | 163.6036 |
| CHAF1A       | 1.40844  | 2.105315 | 27.15178 | 9.38E-85  | 1.89E-83  | 181.3478 |
| HDGFRP2      | 1.662062 | 4.252506 | 27.21398 | 5.64E-85  | 1.15E-83  | 181.8573 |
| PLIN4        | -1.54619 | 2.25979  | -11.1669 | 1.21E-24  | 5.34E-24  | 42.95721 |
| PLIN5        | -4.22615 | 3.640851 | -40.1911 | 1.54E-126 | 3.25E-124 | 277.7604 |
| CTB-50L17.14 | -2.61473 | 1.690007 | -39.7726 | 2.47E-125 | 4.84E-123 | 274.9809 |
| SEMA6B       | 1.74893  | 2.189495 | 23.39334 | 4.80E-71  | 6.13E-70  | 149.7342 |
| TNFAIP8L1    | 2.007292 | 1.994763 | 39.14109 | 1.68E-123 | 2.90E-121 | 270.7489 |
| AC005339.2   | 2.272266 | 1.655617 | 29.69792 | 1.25E-93  | 3.79E-92  | 201.819  |
| DPP9         | 1.399477 | 4.032595 | 21.8963  | 2.09E-65  | 2.27E-64  | 136.7361 |
| TICAM1       | 2.200122 | 3.283444 | 31.9045  | 4.91E-101 | 2.16E-99  | 218.9071 |
| CTC-518P12.6 | 1.688669 | 0.860935 | 19.14847 | 7.28E-55  | 6.05E-54  | 112.4436 |
| PLIN3        | 2.917708 | 4.358671 | 41.24241 | 1.58E-129 | 4.35E-127 | 284.6588 |
| UHRF1        | 2.343591 | 1.334915 | 41.78102 | 4.87E-131 | 1.52E-128 | 288.1464 |
| C19orf70     | 1.608009 | 5.349966 | 24.16172 | 6.66E-74  | 9.35E-73  | 156.3228 |
| LONP1        | 1.240463 | 4.55688  | 20.02636 | 2.97E-58  | 2.67E-57  | 120.2517 |
| NRTN         | -1.4759  | 1.984845 | -24.8022 | 2.90E-76  | 4.40E-75  | 161.7674 |
| FUT6         | 2.672759 | 2.341857 | 29.90026 | 2.55E-94  | 8.00E-93  | 203.4114 |
| FUT3         | 3.376345 | 3.643003 | 32.92175 | 2.32E-104 | 1.24E-102 | 226.5796 |
| NDUFA11      | 1.510286 | 6.977342 | 20.33502 | 1.93E-59  | 1.78E-58  | 122.9881 |
| CAPS         | 1.743312 | 4.49718  | 16.98325 | 1.81E-46  | 1.25E-45  | 93.11111 |
| RANBP3       | 1.267442 | 4.509048 | 21.1987  | 9.46E-63  | 9.57E-62  | 130.6146 |
| RFX2         | 1.543446 | 1.792788 | 25.2795  | 5.19E-78  | 8.35E-77  | 165.7962 |
| CLPP         | 1.364598 | 5.077641 | 22.15591 | 2.17E-66  | 2.42E-65  | 139.0044 |
| SLC25A23     | 1.460632 | 4.018896 | 22.41406 | 2.29E-67  | 2.63E-66  | 141.2543 |
| DENND1C      | 1.200433 | 3.494816 | 17.78725 | 1.38E-49  | 1.01E-48  | 100.2919 |
| TD-2396E7.1  | 1.113883 | 4.05733  | 15.34133 | 3.98E-40  | 2.41E-39  | 78.51679 |
| TNFSF9       | 2.081033 | 1.072537 | 24.75808 | 4.21E-76  | 6.35E-75  | 161.3939 |
| CD70         | 1.396478 | 0.712076 | 17.66397 | 4.14E-49  | 3.01E-48  | 99.19047 |

|               |           |           |           |            |            |           |
|---------------|-----------|-----------|-----------|------------|------------|-----------|
| C3            | 2. 653978 | 8. 34534  | 15. 70813 | 1. 55E-41  | 9. 60E-41  | 81. 76322 |
| GPR108        | 1. 143475 | 5. 619606 | 16. 72788 | 1. 77E-45  | 1. 20E-44  | 90. 83296 |
| TRIP10        | 1. 645369 | 5. 355367 | 18. 58327 | 1. 12E-52  | 8. 85E-52  | 107. 4021 |
| SH2D3A        | 1. 534133 | 4. 08118  | 18. 43743 | 4. 13E-52  | 3. 21E-51  | 106. 1001 |
| VAV1          | 2. 53587  | 1. 830074 | 33. 14998 | 4. 24E-105 | 2. 39E-103 | 228. 2833 |
| ARHGEF18      | 1. 462314 | 3. 824342 | 21. 22693 | 7. 38E-63  | 7. 49E-62  | 130. 8631 |
| ZNF358        | 1. 124372 | 4. 83704  | 17. 25249 | 1. 64E-47  | 1. 15E-46  | 95. 51483 |
| MCOLN1        | 1. 397465 | 3. 517605 | 23. 69894 | 3. 48E-72  | 4. 60E-71  | 152. 3617 |
| PNPLA6        | 1. 737158 | 4. 415189 | 24. 48257 | 4. 35E-75  | 6. 35E-74  | 159. 0558 |
| PET100        | 1. 978417 | 4. 971486 | 31. 70575 | 2. 22E-100 | 9. 48E-99  | 217. 393  |
| RETN          | 1. 933845 | 1. 329768 | 15. 65566 | 2. 46E-41  | 1. 52E-40  | 81. 29819 |
| MCEMP1        | 1. 638721 | 1. 099152 | 15. 96104 | 1. 64E-42  | 1. 04E-41  | 84. 0073  |
| FD-3214H19. 1 | 1. 409455 | 0. 969095 | 11. 53927 | 5. 86E-26  | 2. 66E-25  | 45. 97334 |
| TRAPPC5       | 1. 725392 | 5. 324627 | 21. 58774 | 3. 11E-64  | 3. 27E-63  | 134. 0331 |
| EVI5L         | 1. 314413 | 2. 343737 | 26. 00025 | 1. 25E-80  | 2. 19E-79  | 171. 8312 |
| LRRRC8E       | 1. 150454 | 1. 860742 | 19. 09434 | 1. 18E-54  | 9. 74E-54  | 111. 9612 |
| SNAPC2        | 1. 60011  | 3. 704638 | 25. 15127 | 1. 53E-77  | 2. 41E-76  | 164. 7163 |
| CTXN1         | 1. 826212 | 1. 693554 | 22. 87817 | 4. 09E-69  | 4. 94E-68  | 145. 2843 |
| ELAVL1        | 1. 60967  | 4. 352876 | 29. 35548 | 1. 87E-92  | 5. 32E-91  | 199. 1124 |
| CERS4         | -2. 01122 | 4. 484889 | -23. 7666 | 1. 95E-72  | 2. 60E-71  | 152. 9424 |
| NDUFA7        | 1. 924461 | 5. 201875 | 30. 57239 | 1. 35E-96  | 4. 73E-95  | 208. 6641 |
| 2-Mar         | 1. 870577 | 3. 864905 | 30. 40403 | 4. 99E-96  | 1. 70E-94  | 207. 3537 |
| HNRNPM        | 1. 26511  | 5. 86302  | 18. 81939 | 1. 37E-53  | 1. 10E-52  | 109. 5094 |
| PRAM1         | 1. 177204 | 1. 382723 | 15. 63999 | 2. 83E-41  | 1. 75E-40  | 81. 15937 |
| MYO1F         | 1. 782892 | 2. 364994 | 19. 80039 | 2. 21E-57  | 1. 95E-56  | 118. 2452 |
| MUC16         | 3. 151859 | 1. 564545 | 18. 92587 | 5. 29E-54  | 4. 30E-53  | 110. 4592 |
| ZNF317        | 1. 280184 | 3. 335789 | 23. 9461  | 4. 20E-73  | 5. 71E-72  | 154. 4799 |
| ZNF561-AS1    | 1. 41808  | 1. 891852 | 28. 16798 | 2. 45E-88  | 5. 72E-87  | 189. 6138 |
| ZNF562        | 1. 104679 | 2. 120945 | 21. 78028 | 5. 76E-65  | 6. 18E-64  | 135. 7207 |
| ZNF846        | 1. 549266 | 2. 317691 | 26. 07359 | 6. 81E-81  | 1. 20E-79  | 172. 4419 |
| FBXL12        | 1. 137024 | 3. 291644 | 19. 74713 | 3. 54E-57  | 3. 11E-56  | 117. 7718 |
| UBL5          | 2. 229431 | 7. 455769 | 29. 76264 | 7. 53E-94  | 2. 31E-92  | 202. 3289 |
| PIN1          | 1. 587614 | 4. 937376 | 24. 75432 | 4. 35E-76  | 6. 55E-75  | 161. 3621 |
| OLFM2         | 1. 235859 | 2. 69075  | 15. 42449 | 1. 91E-40  | 1. 16E-39  | 79. 25188 |
| COL5A3        | 1. 216451 | 2. 208822 | 13. 78555 | 3. 33E-34  | 1. 79E-33  | 64. 90082 |
| C19orf66      | 1. 193059 | 4. 245924 | 15. 73281 | 1. 24E-41  | 7. 73E-41  | 81. 98201 |
| DNMT1         | 1. 457545 | 3. 679454 | 24. 15666 | 6. 95E-74  | 9. 75E-73  | 156. 2795 |
| S1PR2         | 1. 377379 | 1. 718931 | 26. 65214 | 5. 67E-83  | 1. 08E-81  | 177. 2378 |
| MRPL4         | 1. 670909 | 4. 468081 | 26. 7459  | 2. 62E-83  | 5. 04E-82  | 178. 0113 |
| ICAM1         | 3. 068728 | 3. 558675 | 30. 22937 | 1. 95E-95  | 6. 44E-94  | 205. 9904 |
| FDX1L         | 1. 282638 | 3. 71208  | 22. 65901 | 2. 73E-68  | 3. 22E-67  | 143. 3837 |
| TD-2369P2. 1  | 1. 920475 | 2. 943022 | 26. 88707 | 8. 21E-84  | 1. 61E-82  | 179. 174  |
| RAVER1        | 1. 135712 | 3. 300885 | 15. 87161 | 3. 62E-42  | 2. 28E-41  | 83. 21335 |
| ICAM3         | 1. 571227 | 3. 512131 | 25. 1272  | 1. 87E-77  | 2. 95E-76  | 164. 5134 |
| CDC37         | 1. 447837 | 6. 526392 | 19. 46543 | 4. 33E-56  | 3. 70E-55  | 115. 2664 |
| KEAP1         | 2. 036311 | 4. 594323 | 34. 22952 | 1. 49E-108 | 1. 03E-106 | 236. 2545 |
| CDKN2D        | 2. 269117 | 2. 739959 | 33. 60474 | 1. 46E-106 | 8. 89E-105 | 231. 6587 |
| AP1M2         | 1. 984887 | 5. 166339 | 25. 49603 | 8. 44E-79  | 1. 39E-77  | 167. 6155 |
| SLC44A2       | 2. 109674 | 5. 421685 | 29. 48818 | 6. 54E-93  | 1. 91E-91  | 200. 163  |
| DNM2          | 1. 258535 | 5. 896098 | 15. 57629 | 4. 98E-41  | 3. 06E-40  | 80. 59516 |
| TMED1         | 1. 289801 | 4. 376571 | 22. 99661 | 1. 47E-69  | 1. 79E-68  | 146. 3096 |
| C19orf38      | 1. 06561  | 1. 04488  | 19. 82054 | 1. 85E-57  | 1. 63E-56  | 118. 4242 |
| AC007229. 3   | 1. 170068 | 0. 832981 | 31. 97146 | 2. 95E-101 | 1. 31E-99  | 219. 4161 |
| C19orf52      | 1. 237824 | 3. 118354 | 25. 94267 | 2. 02E-80  | 3. 51E-79  | 171. 3512 |

|               |           |           |           |            |            |           |
|---------------|-----------|-----------|-----------|------------|------------|-----------|
| SMARCA4       | 1. 67878  | 4. 92859  | 25. 06702 | 3. 10E-77  | 4. 85E-76  | 164. 0059 |
| LDLR          | 2. 901986 | 4. 44544  | 24. 53735 | 2. 73E-75  | 4. 01E-74  | 159. 5213 |
| SPC24         | 2. 041863 | 1. 252377 | 35. 36169 | 4. 14E-112 | 3. 55E-110 | 244. 4608 |
| KANK2         | 1. 690496 | 4. 554833 | 19. 69935 | 5. 42E-57  | 4. 73E-56  | 117. 3472 |
| DOCK6         | 1. 294571 | 4. 203968 | 17. 15669 | 3. 85E-47  | 2. 69E-46  | 94. 65942 |
| TMEM205       | 1. 305992 | 6. 170441 | 19. 01525 | 2. 39E-54  | 1. 96E-53  | 111. 2562 |
| LPPR2         | 1. 024321 | 3. 405916 | 16. 46329 | 1. 87E-44  | 1. 24E-43  | 88. 4748  |
| RGL3          | -1. 13437 | 4. 368688 | -10. 9978 | 4. 73E-24  | 2. 06E-23  | 41. 60261 |
| PRKCSH        | 1. 290662 | 6. 897734 | 18. 39004 | 6. 31E-52  | 4. 89E-51  | 105. 6769 |
| CNN1          | 3. 129074 | 3. 283693 | 24. 14772 | 7. 50E-74  | 1. 05E-72  | 156. 2032 |
| ACP5          | 3. 151025 | 4. 13137  | 29. 77432 | 6. 87E-94  | 2. 11E-92  | 202. 4208 |
| HNRNPA1P10    | 1. 149018 | 1. 546704 | 18. 92754 | 5. 22E-54  | 4. 24E-53  | 110. 474  |
| ZNF564        | 1. 026767 | 1. 744818 | 24. 58366 | 1. 84E-75  | 2. 72E-74  | 159. 9147 |
| MAN2B1        | 2. 231318 | 5. 177538 | 33. 86684 | 2. 12E-107 | 1. 35E-105 | 233. 5926 |
| WDR830S       | 1. 455625 | 6. 887552 | 21. 45395 | 1. 00E-63  | 1. 04E-62  | 132. 8588 |
| FBXW9         | 1. 112575 | 2. 47122  | 22. 75114 | 1. 23E-68  | 1. 46E-67  | 144. 1832 |
| C19orf43      | 1. 117624 | 6. 555667 | 15. 26494 | 7. 83E-40  | 4. 71E-39  | 77. 84206 |
| ASNA1         | 1. 508481 | 5. 064533 | 25. 05576 | 3. 41E-77  | 5. 32E-76  | 163. 9109 |
| JUNB          | 2. 165506 | 6. 460479 | 15. 78692 | 7. 68E-42  | 4. 80E-41  | 82. 46193 |
| PRDX2         | 1. 070351 | 6. 716835 | 14. 85349 | 2. 95E-38  | 1. 72E-37  | 74. 21723 |
| RNASEH2A      | 1. 98232  | 3. 189132 | 34. 8977  | 1. 16E-110 | 9. 12E-109 | 241. 1166 |
| DNASE2        | 2. 033081 | 4. 498447 | 35. 93641 | 6. 88E-114 | 6. 68E-112 | 248. 5671 |
| FARSA         | 1. 461404 | 4. 59743  | 25. 64928 | 2. 34E-79  | 3. 93E-78  | 168. 8998 |
| CALR          | 2. 315899 | 7. 952452 | 27. 83351 | 3. 65E-87  | 8. 10E-86  | 186. 907  |
| CTC-425F1. 4  | 2. 170511 | 2. 081256 | 13. 53154 | 3. 00E-33  | 1. 58E-32  | 62. 70901 |
| RAD23A        | 1. 597727 | 5. 676618 | 24. 60742 | 1. 51E-75  | 2. 23E-74  | 160. 1164 |
| GADD45GIP1    | 1. 53859  | 4. 626979 | 23. 69373 | 3. 64E-72  | 4. 80E-71  | 152. 317  |
| NFIX          | 1. 973519 | 3. 577309 | 27. 2117  | 5. 74E-85  | 1. 17E-83  | 181. 8386 |
| LYL1          | 1. 668056 | 1. 695311 | 22. 57738 | 5. 54E-68  | 6. 47E-67  | 142. 6746 |
| NACC1         | 1. 949192 | 3. 212562 | 34. 90299 | 1. 12E-110 | 8. 80E-109 | 241. 1548 |
| STX10         | 1. 391205 | 4. 879079 | 21. 78091 | 5. 73E-65  | 6. 15E-64  | 135. 7262 |
| IER2          | 1. 38663  | 5. 69696  | 12. 10775 | 5. 34E-28  | 2. 53E-27  | 50. 65337 |
| C19orf53      | 1. 917245 | 6. 201872 | 27. 73079 | 8. 38E-87  | 1. 84E-85  | 186. 073  |
| ZSWIM4        | 1. 878798 | 2. 156058 | 29. 76394 | 7. 45E-94  | 2. 28E-92  | 202. 3391 |
| CTD-3252C9. 4 | 2. 327515 | 3. 071979 | 21. 93808 | 1. 45E-65  | 1. 58E-64  | 137. 1015 |
| NANOS3        | 1. 068024 | 0. 834072 | 18. 75565 | 2. 42E-53  | 1. 93E-52  | 108. 9407 |
| PODNL1        | 3. 135212 | 2. 16794  | 34. 10487 | 3. 70E-108 | 2. 49E-106 | 235. 3415 |
| DCAF15        | 1. 125693 | 3. 988858 | 11. 48184 | 9. 38E-26  | 4. 23E-25  | 45. 50549 |
| IL27RA        | 1. 813638 | 1. 885354 | 30. 11156 | 4. 89E-95  | 1. 59E-93  | 205. 0688 |
| SAMD1         | 1. 166966 | 4. 007095 | 17. 10373 | 6. 17E-47  | 4. 30E-46  | 94. 18658 |
| PRKACA        | 1. 473117 | 4. 467791 | 24. 58841 | 1. 77E-75  | 2. 62E-74  | 159. 955  |
| ASF1B         | 2. 72074  | 1. 634556 | 46. 03888 | 1. 59E-142 | 1. 30E-139 | 314. 6561 |
| ADGRE5        | 2. 313743 | 4. 77102  | 29. 95146 | 1. 71E-94  | 5. 42E-93  | 203. 8135 |
| DDX39A        | 1. 769379 | 4. 834352 | 25. 18203 | 1. 18E-77  | 1. 87E-76  | 164. 9756 |
| PKN1          | 1. 737456 | 5. 418437 | 25. 13633 | 1. 73E-77  | 2. 73E-76  | 164. 5904 |
| GIPC1         | 2. 911506 | 5. 569793 | 35. 21046 | 1. 22E-111 | 1. 02E-109 | 243. 3736 |
| DNAJB1        | 2. 383136 | 5. 361918 | 21. 75309 | 7. 30E-65  | 7. 82E-64  | 135. 4826 |
| TECR          | 1. 905921 | 6. 132557 | 26. 8287  | 1. 33E-83  | 2. 58E-82  | 178. 6936 |
| NDUFB7        | 1. 231812 | 6. 822641 | 16. 35236 | 5. 03E-44  | 3. 29E-43  | 87. 48706 |
| ITGB1P1       | 1. 488113 | 3. 928779 | 9. 999117 | 1. 21E-20  | 4. 90E-20  | 33. 79909 |
| ADGRE2        | 1. 014538 | 0. 905182 | 17. 01254 | 1. 39E-46  | 9. 64E-46  | 93. 37258 |
| AC005255. 3   | 2. 371704 | 1. 354083 | 30. 91651 | 9. 43E-98  | 3. 50E-96  | 211. 3314 |
| SYDE1         | 1. 57993  | 2. 450027 | 23. 17297 | 3. 20E-70  | 4. 01E-69  | 147. 8338 |
| ILVBL         | 1. 226697 | 4. 740351 | 20. 16073 | 9. 03E-59  | 8. 22E-58  | 121. 4436 |

|              |           |           |           |            |            |           |
|--------------|-----------|-----------|-----------|------------|------------|-----------|
| NOTCH3       | 2. 553445 | 3. 536687 | 28. 26615 | 1. 11E-88  | 2. 64E-87  | 190. 4057 |
| EPHX3        | 1. 374829 | 0. 792542 | 15. 6228  | 3. 29E-41  | 2. 03E-40  | 81. 0071  |
| RASAL3       | 1. 555494 | 1. 693452 | 18. 55571 | 1. 44E-52  | 1. 13E-51  | 107. 1561 |
| CYP4F3       | 2. 036229 | 1. 170031 | 23. 937   | 4. 53E-73  | 6. 17E-72  | 154. 4021 |
| CYP4F12      | 2. 383847 | 2. 012074 | 22. 85734 | 4. 89E-69  | 5. 90E-68  | 145. 1038 |
| UCA1         | 3. 062763 | 1. 736298 | 21. 15805 | 1. 35E-62  | 1. 36E-61  | 130. 2568 |
| CYP4F11      | 1. 02639  | 1. 529682 | 10. 42559 | 4. 43E-22  | 1. 85E-21  | 37. 08706 |
| TPM4         | 3. 755643 | 6. 711273 | 40. 14324 | 2. 11E-126 | 4. 42E-124 | 277. 4437 |
| RAB8A        | 2. 076734 | 4. 055849 | 33. 65981 | 9. 73E-107 | 5. 99E-105 | 232. 0658 |
| TD-2231E14.  | 2. 129695 | 4. 101079 | 38. 35204 | 3. 50E-121 | 5. 35E-119 | 265. 3979 |
| HSH2D        | 2. 15138  | 2. 859546 | 29. 11246 | 1. 28E-91  | 3. 53E-90  | 197. 1828 |
| FAM32A       | 1. 818495 | 5. 204313 | 30. 15591 | 3. 45E-95  | 1. 13E-93  | 205. 416  |
| AP1M1        | 1. 698268 | 4. 002263 | 27. 69178 | 1. 15E-86  | 2. 51E-85  | 185. 7559 |
| KLF2         | 2. 715495 | 3. 664321 | 24. 75348 | 4. 38E-76  | 6. 59E-75  | 161. 3549 |
| EPS15L1      | 1. 077628 | 3. 440365 | 19. 78864 | 2. 45E-57  | 2. 16E-56  | 118. 1407 |
| MED26        | 1. 095918 | 1. 959767 | 27. 34611 | 1. 92E-85  | 3. 97E-84  | 182. 9382 |
| CTC-429P9. 4 | 1. 06758  | 1. 695078 | 8. 20017  | 6. 02E-15  | 2. 13E-14  | 20. 79525 |
| SMIM7        | 1. 186746 | 5. 590936 | 18. 208   | 3. 21E-51  | 2. 44E-50  | 104. 051  |
| TMEM38A      | 1. 704594 | 1. 838852 | 23. 57122 | 1. 04E-71  | 1. 35E-70  | 151. 2648 |
| F2RL3        | 1. 310751 | 1. 978717 | 13. 73131 | 5. 33E-34  | 2. 85E-33  | 64. 43187 |
| HAUS8        | 1. 739209 | 2. 244643 | 34. 88574 | 1. 27E-110 | 9. 89E-109 | 241. 03   |
| MYO9B        | 1. 693019 | 4. 624396 | 24. 26101 | 2. 86E-74  | 4. 06E-73  | 157. 1697 |
| OCEL1        | 1. 021663 | 4. 245142 | 15. 99737 | 1. 18E-42  | 7. 54E-42  | 84. 33007 |
| BABAM1       | 1. 462288 | 5. 174923 | 25. 22856 | 7. 96E-78  | 1. 27E-76  | 165. 3675 |
| MRPL34       | 1. 226849 | 5. 272541 | 18. 18138 | 4. 07E-51  | 3. 09E-50  | 103. 8132 |
| DDA1         | 2. 38114  | 4. 252673 | 35. 60674 | 7. 18E-113 | 6. 42E-111 | 246. 2165 |
| PLVAP        | 1. 341372 | 5. 652172 | 15. 65365 | 2. 51E-41  | 1. 55E-40  | 81. 28042 |
| BST2         | 4. 181309 | 5. 371032 | 37. 22333 | 8. 22E-118 | 1. 00E-115 | 257. 6189 |
| MVB12A       | 1. 288773 | 4. 930669 | 19. 0429  | 1. 87E-54  | 1. 53E-53  | 111. 5027 |
| SLC27A1      | 1. 131205 | 3. 489678 | 17. 3635  | 6. 07E-48  | 4. 31E-47  | 96. 50626 |
| PGLS         | 1. 095829 | 5. 606123 | 14. 60506 | 2. 62E-37  | 1. 50E-36  | 72. 03705 |
| COLGALT1     | 2. 101251 | 4. 631434 | 27. 90309 | 2. 08E-87  | 4. 65E-86  | 187. 4712 |
| MAP1S        | 2. 419322 | 3. 843925 | 36. 74057 | 2. 38E-116 | 2. 67E-114 | 254. 2463 |
| FCH01        | 2. 194674 | 1. 576976 | 32. 08897 | 1. 21E-101 | 5. 52E-100 | 220. 3081 |
| B3GNT3       | 4. 476811 | 3. 300717 | 48. 32071 | 2. 32E-148 | 2. 81E-145 | 328. 13   |
| JAK3         | 1. 660543 | 1. 757683 | 22. 43418 | 1. 92E-67  | 2. 21E-66  | 141. 4294 |
| CCDC124      | 1. 367678 | 5. 403771 | 18. 31571 | 1. 23E-51  | 9. 43E-51  | 105. 0131 |
| ARRDC2       | 2. 427427 | 4. 102029 | 28. 23068 | 1. 48E-88  | 3. 48E-87  | 190. 1197 |
| IL12RB1      | 1. 480042 | 0. 938261 | 26. 532   | 1. 53E-82  | 2. 86E-81  | 176. 2452 |
| AC007192. 6  | 1. 178275 | 2. 192129 | 11. 67467 | 1. 93E-26  | 8. 84E-26  | 47. 07997 |
| PIK3R2       | 1. 533698 | 3. 730545 | 26. 56352 | 1. 18E-82  | 2. 21E-81  | 176. 5057 |
| IFI30        | 3. 377699 | 6. 090337 | 33. 46854 | 3. 99E-106 | 2. 38E-104 | 230. 6505 |
| MPV17L2      | 1. 107459 | 3. 006148 | 20. 58273 | 2. 16E-60  | 2. 05E-59  | 125. 1803 |
| RAB3A        | 1. 010839 | 1. 279187 | 21. 57423 | 3. 50E-64  | 3. 67E-63  | 133. 9146 |
| PDE4C        | 3. 272802 | 2. 596283 | 23. 779   | 1. 75E-72  | 2. 34E-71  | 153. 0486 |
| LSM4         | 2. 166281 | 5. 563317 | 31. 44155 | 1. 67E-99  | 6. 78E-98  | 215. 3726 |
| LRRC25       | 1. 588672 | 1. 459394 | 21. 98135 | 9. 93E-66  | 1. 09E-64  | 137. 4799 |
| SSBP4        | 1. 31617  | 4. 959714 | 16. 95173 | 2. 40E-46  | 1. 65E-45  | 92. 82988 |
| FKBP8        | 1. 711172 | 6. 664162 | 23. 571   | 1. 04E-71  | 1. 35E-70  | 151. 2629 |
| COMP         | 5. 133887 | 3. 424148 | 42. 76229 | 9. 32E-134 | 3. 71E-131 | 294. 4209 |
| UPF1         | 1. 142613 | 4. 553045 | 18. 85099 | 1. 03E-53  | 8. 32E-53  | 109. 7913 |
| COPE         | 1. 272019 | 6. 463491 | 18. 395   | 6. 04E-52  | 4. 68E-51  | 105. 7212 |
| DDX49        | 1. 065248 | 4. 481456 | 17. 90651 | 4. 74E-50  | 3. 52E-49  | 101. 3575 |
| HOMER3       | 2. 312434 | 3. 69523  | 30. 58861 | 1. 19E-96  | 4. 19E-95  | 208. 7902 |

|              |           |           |           |            |            |           |
|--------------|-----------|-----------|-----------|------------|------------|-----------|
| ARMC6        | 1. 722647 | 3. 058786 | 31. 73712 | 1. 75E-100 | 7. 50E-99  | 217. 6323 |
| EF2BNB-MEF2  | 1. 170247 | 2. 256954 | 21. 26273 | 5. 39E-63  | 5. 49E-62  | 131. 178  |
| MEF2BNB      | 1. 215489 | 3. 575934 | 22. 3507  | 3. 97E-67  | 4. 53E-66  | 140. 7026 |
| RFXANK       | 1. 585165 | 5. 31733  | 23. 01012 | 1. 31E-69  | 1. 60E-68  | 146. 4264 |
| NR2C2AP      | 1. 475462 | 3. 641451 | 25. 21813 | 8. 69E-78  | 1. 39E-76  | 165. 2796 |
| TM6SF2       | 1. 530023 | 0. 954666 | 23. 52822 | 1. 51E-71  | 1. 95E-70  | 150. 8951 |
| GATAD2A      | 1. 473835 | 4. 027685 | 24. 29155 | 2. 20E-74  | 3. 14E-73  | 157. 43   |
| NDUFA13      | 2. 393235 | 7. 079186 | 34. 13768 | 2. 91E-108 | 1. 97E-106 | 235. 582  |
| CILP2        | 1. 929393 | 0. 984474 | 24. 80736 | 2. 77E-76  | 4. 22E-75  | 161. 8112 |
| PBX4         | 1. 73695  | 1. 472469 | 25. 92177 | 2. 41E-80  | 4. 17E-79  | 171. 177  |
| GMIP         | 1. 86671  | 2. 743895 | 31. 15092 | 1. 55E-98  | 5. 99E-97  | 213. 1399 |
| ZNF101       | 1. 220525 | 1. 913375 | 11. 33025 | 3. 23E-25  | 1. 44E-24  | 44. 27539 |
| TD-2626G11.  | -1. 24427 | 0. 777152 | -17. 4556 | 2. 66E-48  | 1. 91E-47  | 97. 32902 |
| P11-678G14.  | -1. 42848 | 1. 313475 | -20. 7464 | 5. 09E-61  | 4. 92E-60  | 126. 6266 |
| P11-420K14.  | -1. 25551 | 1. 394237 | -12. 0833 | 6. 55E-28  | 3. 10E-27  | 50. 45057 |
| ZNF98        | -1. 54343 | 1. 326001 | -22. 9486 | 2. 22E-69  | 2. 70E-68  | 145. 8938 |
| AC025811.3   | -1. 10216 | 0. 706687 | -23. 2894 | 1. 17E-70  | 1. 48E-69  | 148. 8388 |
| CTC-459F4.3  | 1. 017913 | 1. 804851 | 19. 69309 | 5. 73E-57  | 4. 99E-56  | 117. 2915 |
| UQCRFS1      | 1. 056266 | 4. 018378 | 19. 76713 | 2. 97E-57  | 2. 61E-56  | 117. 9496 |
| POP4         | 1. 603141 | 4. 995969 | 24. 51019 | 3. 44E-75  | 5. 04E-74  | 159. 2905 |
| PLEKHF1      | 1. 467052 | 2. 223036 | 21. 52358 | 5. 45E-64  | 5. 70E-63  | 133. 4701 |
| CCNE1        | 1. 676185 | 1. 449881 | 29. 01563 | 2. 76E-91  | 7. 50E-90  | 196. 4119 |
| URI1         | 1. 231935 | 4. 361817 | 20. 47216 | 5. 73E-60  | 5. 38E-59  | 124. 2023 |
| TSHZ3        | 1. 519901 | 1. 408016 | 24. 16945 | 6. 24E-74  | 8. 76E-73  | 156. 3887 |
| PDCD5        | 1. 140409 | 5. 829385 | 16. 61201 | 4. 97E-45  | 3. 33E-44  | 89. 79992 |
| ANKRD27      | 1. 456674 | 2. 622353 | 26. 7403  | 2. 75E-83  | 5. 27E-82  | 177. 9652 |
| NUDT19       | 1. 071432 | 2. 191556 | 23. 36358 | 6. 20E-71  | 7. 89E-70  | 149. 4778 |
| CEP89        | 1. 380923 | 2. 716415 | 12. 27307 | 1. 34E-28  | 6. 44E-28  | 52. 03023 |
| FAAP24       | 1. 18378  | 1. 053101 | 27. 54877 | 3. 68E-86  | 7. 85E-85  | 184. 5919 |
| RHPN2        | 2. 552262 | 3. 370866 | 28. 71793 | 2. 96E-90  | 7. 65E-89  | 194. 0345 |
| FD-2540B15.1 | 1. 675621 | 2. 608947 | 19. 81306 | 1. 97E-57  | 1. 74E-56  | 118. 3577 |
| CEBPG        | 1. 460395 | 3. 317701 | 23. 16779 | 3. 35E-70  | 4. 19E-69  | 147. 789  |
| PEPD         | 1. 994234 | 4. 441203 | 30. 89843 | 1. 08E-97  | 4. 01E-96  | 211. 1917 |
| CTC-526N19.1 | -1. 40185 | 1. 414415 | -24. 7621 | 4. 07E-76  | 6. 14E-75  | 161. 4277 |
| LSM14A       | 1. 503174 | 4. 85839  | 22. 0109  | 7. 67E-66  | 8. 44E-65  | 137. 7381 |
| GPI          | 2. 371129 | 6. 245563 | 30. 51922 | 2. 04E-96  | 7. 07E-95  | 208. 2506 |
| PDCD2L       | 1. 023384 | 2. 713819 | 19. 50384 | 3. 08E-56  | 2. 64E-55  | 115. 6083 |
| UBA2         | 1. 518671 | 4. 922562 | 21. 46333 | 9. 25E-64  | 9. 62E-63  | 132. 9412 |
| WTIP         | 1. 597984 | 2. 371598 | 22. 82575 | 6. 43E-69  | 7. 72E-68  | 144. 8301 |
| HPN          | -3. 42391 | 4. 984023 | -23. 9871 | 2. 95E-73  | 4. 05E-72  | 154. 8309 |
| HPN-AS1      | -1. 43852 | 0. 898441 | -32. 9851 | 1. 45E-104 | 7. 88E-103 | 227. 0534 |
| FXYD3        | 4. 918759 | 6. 694315 | 41. 07151 | 4. 80E-129 | 1. 25E-126 | 283. 5456 |
| FXYD5        | 4. 936602 | 5. 78801  | 49. 33203 | 7. 00E-151 | 9. 84E-148 | 333. 9479 |
| LSR          | 2. 427363 | 6. 430031 | 27. 30918 | 2. 59E-85  | 5. 35E-84  | 182. 6363 |
| USF2         | 1. 296154 | 6. 134806 | 18. 73844 | 2. 82E-53  | 2. 24E-52  | 108. 7871 |
| CD22         | 1. 51504  | 1. 335345 | 13. 60137 | 1. 64E-33  | 8. 69E-33  | 63. 31053 |
| ATP4A        | -2. 04593 | 1. 133832 | -20. 1249 | 1. 24E-58  | 1. 12E-57  | 121. 1254 |
| RBM42        | 2. 038736 | 4. 929299 | 31. 34385 | 3. 53E-99  | 1. 40E-97  | 214. 6232 |
| COX6B1       | 2. 218206 | 7. 29782  | 29. 08359 | 1. 61E-91  | 4. 42E-90  | 196. 9531 |
| PSENNEN      | 2. 3256   | 5. 73875  | 32. 79129 | 6. 15E-104 | 3. 23E-102 | 225. 6028 |
| AC002398.9   | 1. 523231 | 2. 019291 | 24. 35721 | 1. 26E-74  | 1. 81E-73  | 157. 9893 |
| AC002398.12  | 1. 419399 | 1. 410321 | 11. 64495 | 2. 46E-26  | 1. 13E-25  | 46. 83663 |
| PRODH2       | -1. 59952 | 0. 998795 | -32. 0993 | 1. 12E-101 | 5. 12E-100 | 220. 3863 |
| NPHS1        | -2. 98587 | 2. 241635 | -42. 3061 | 1. 69E-132 | 6. 01E-130 | 291. 5167 |

|             |          |          |          |           |           |          |
|-------------|----------|----------|----------|-----------|-----------|----------|
| KIRREL2     | -3.25136 | 3.08453  | -34.2499 | 1.28E-108 | 8.91E-107 | 236.4036 |
| HCST        | 2.964517 | 2.989898 | 31.98436 | 2.68E-101 | 1.20E-99  | 219.5141 |
| TYROBP      | 3.772751 | 5.265605 | 31.67483 | 2.81E-100 | 1.20E-98  | 217.157  |
| ALKBH6      | 1.319148 | 3.168914 | 21.90264 | 1.98E-65  | 2.15E-64  | 136.7916 |
| CLIP3       | 1.987922 | 2.195752 | 26.31307 | 9.34E-82  | 1.70E-80  | 174.4319 |
| WDR62       | 1.149105 | 0.740582 | 29.51683 | 5.21E-93  | 1.53E-91  | 200.3896 |
| POLR2I      | 1.153982 | 5.6566   | 16.48173 | 1.59E-44  | 1.05E-43  | 88.63905 |
| TBCB        | 2.429054 | 5.636636 | 33.49199 | 3.36E-106 | 2.02E-104 | 230.8242 |
| CAPNS1      | 2.629048 | 8.144447 | 30.97894 | 5.83E-98  | 2.19E-96  | 211.8137 |
| COX7A1      | 2.258262 | 4.538322 | 25.263   | 5.96E-78  | 9.57E-77  | 165.6573 |
| ZNF146      | 1.624656 | 4.082482 | 23.93053 | 4.79E-73  | 6.51E-72  | 154.3467 |
| ZNF260      | 1.250999 | 1.640704 | 25.75721 | 9.50E-80  | 1.61E-78  | 169.8028 |
| ZNF790      | 1.158173 | 1.376285 | 24.77655 | 3.60E-76  | 5.44E-75  | 161.5503 |
| ZNF585A     | 1.347393 | 2.722206 | 24.54026 | 2.66E-75  | 3.92E-74  | 159.5461 |
| SIPA1L3     | 1.6951   | 3.014573 | 23.32014 | 9.01E-71  | 1.14E-69  | 149.1035 |
| SPINT2      | 2.593727 | 7.889782 | 28.26185 | 1.15E-88  | 2.72E-87  | 190.371  |
| CTB-102L5.4 | 1.013086 | 1.641831 | 10.77843 | 2.73E-23  | 1.17E-22  | 39.858   |
| C19orf33    | 7.265106 | 5.043918 | 65.0571  | 1.45E-185 | 2.93E-181 | 414.006  |
| YIF1B       | 1.646161 | 4.333862 | 26.43524 | 3.40E-82  | 6.28E-81  | 175.4444 |
| PSMD8       | 1.745585 | 6.229313 | 24.62077 | 1.35E-75  | 2.00E-74  | 160.2297 |
| SPRED3      | 1.075083 | 1.102409 | 9.593258 | 2.65E-19  | 1.04E-18  | 30.73704 |
| FAM98C      | 1.031783 | 3.83518  | 16.46444 | 1.85E-44  | 1.22E-43  | 88.48511 |
| MAP4K1      | 1.645055 | 1.668322 | 19.02612 | 2.17E-54  | 1.78E-53  | 111.3531 |
| EIF3K       | 1.49955  | 7.31742  | 20.51781 | 3.83E-60  | 3.61E-59  | 124.6062 |
| ACTN4       | 2.668917 | 6.839932 | 29.06265 | 1.90E-91  | 5.20E-90  | 196.7864 |
| CAPN12      | 2.118955 | 3.338995 | 17.8491  | 7.92E-50  | 5.86E-49  | 100.8446 |
| LGALS7      | 1.01432  | 0.636454 | 8.021797 | 2.03E-14  | 7.10E-14  | 19.59318 |
| LGALS7B     | 1.812863 | 1.699689 | 10.30234 | 1.16E-21  | 4.79E-21  | 36.12979 |
| LGALS4      | 4.484276 | 6.306534 | 28.39442 | 3.96E-89  | 9.61E-88  | 191.4385 |
| ECH1        | 1.863362 | 6.6918   | 24.39569 | 9.09E-75  | 1.31E-73  | 158.3169 |
| AC104534.3  | 1.842    | 1.045901 | 11.16188 | 1.26E-24  | 5.55E-24  | 42.91721 |
| HNRNPL      | 1.690534 | 6.719867 | 24.55285 | 2.39E-75  | 3.53E-74  | 159.653  |
| RINL        | 1.028417 | 3.126254 | 14.91377 | 1.74E-38  | 1.02E-37  | 74.74722 |
| NFKBIB      | 1.775617 | 3.706994 | 27.91645 | 1.86E-87  | 4.18E-86  | 187.5795 |
| MRPS12      | 1.626715 | 4.443297 | 23.97089 | 3.39E-73  | 4.64E-72  | 154.692  |
| PAK4        | 1.342734 | 4.497495 | 17.27192 | 1.37E-47  | 9.70E-47  | 95.68837 |
| SYCN        | -8.08677 | 8.143178 | -23.4638 | 2.62E-71  | 3.37E-70  | 150.3405 |
| GMFG        | 3.013537 | 3.863835 | 32.26575 | 3.19E-102 | 1.51E-100 | 221.6466 |
| TC-246B18.1 | 1.226134 | 1.608002 | 9.657164 | 1.64E-19  | 6.46E-19  | 31.21464 |
| SAMD4B      | 1.774921 | 5.650724 | 23.8069  | 1.38E-72  | 1.85E-71  | 153.2878 |
| PAF1        | 1.722932 | 4.559561 | 26.10098 | 5.43E-81  | 9.60E-80  | 172.6699 |
| MED29       | 1.687265 | 3.787277 | 27.60888 | 2.26E-86  | 4.86E-85  | 185.0814 |
| ZFP36       | 2.448873 | 6.390543 | 18.17255 | 4.40E-51  | 3.34E-50  | 103.7343 |
| PLEKHG2     | 1.936076 | 2.989855 | 24.51934 | 3.18E-75  | 4.67E-74  | 159.3683 |
| RPS16       | 1.015084 | 10.46193 | 9.755523 | 7.77E-20  | 3.09E-19  | 31.95309 |
| SUPT5H      | 1.038579 | 5.730699 | 13.87728 | 1.50E-34  | 8.13E-34  | 65.69484 |
| TIMM50      | 1.617244 | 4.69025  | 24.70585 | 6.55E-76  | 9.81E-75  | 160.9513 |
| EID2        | 1.292019 | 2.356429 | 26.32103 | 8.75E-82  | 1.60E-80  | 174.4979 |
| DYRK1B      | 1.393356 | 2.925545 | 20.41585 | 9.43E-60  | 8.80E-59  | 123.7039 |
| FBL         | 1.311683 | 7.009473 | 16.24994 | 1.25E-43  | 8.13E-43  | 86.57555 |
| FCGBP       | 1.863011 | 2.269316 | 14.25404 | 5.66E-36  | 3.14E-35  | 68.96919 |
| PSMC4       | 2.275669 | 5.12485  | 33.88163 | 1.90E-107 | 1.22E-105 | 233.7014 |
| C19orf47    | 1.465323 | 2.437493 | 29.37704 | 1.57E-92  | 4.51E-91  | 199.2833 |
| PLD3        | 1.610205 | 6.754233 | 20.33654 | 1.90E-59  | 1.76E-58  | 123.0016 |



|             |           |           |           |            |            |           |
|-------------|-----------|-----------|-----------|------------|------------|-----------|
| SERTAD1     | 2. 798452 | 3. 033903 | 39. 63178 | 6. 30E-125 | 1. 19E-122 | 274. 041  |
| SERTAD3     | 2. 978292 | 3. 594471 | 41. 84784 | 3. 17E-131 | 9. 99E-129 | 288. 5769 |
| BLVRB       | 1. 968514 | 5. 718311 | 24. 79916 | 2. 97E-76  | 4. 51E-75  | 161. 7418 |
| SHKBP1      | 1. 713226 | 4. 956434 | 22. 51953 | 9. 15E-68  | 1. 06E-66  | 142. 1717 |
| LTBP4       | 1. 8852   | 5. 279542 | 21. 4085  | 1. 50E-63  | 1. 55E-62  | 132. 4596 |
| NUMBL       | 1. 410446 | 3. 122124 | 17. 47176 | 2. 31E-48  | 1. 65E-47  | 97. 47331 |
| ADCK4       | 1. 214207 | 4. 054723 | 18. 13989 | 5. 89E-51  | 4. 46E-50  | 103. 4425 |
| ITPKC       | 1. 91427  | 3. 780094 | 24. 70996 | 6. 32E-76  | 9. 48E-75  | 160. 9862 |
| SNRPA       | 1. 701491 | 4. 888206 | 25. 29865 | 4. 42E-78  | 7. 12E-77  | 165. 9573 |
| MIA         | 5. 353352 | 3. 168993 | 33. 9471  | 1. 18E-107 | 7. 64E-106 | 234. 183  |
| RAB4B       | 1. 929816 | 4. 354231 | 27. 27644 | 3. 38E-85  | 6. 95E-84  | 182. 3685 |
| EGLN2       | 2. 014759 | 4. 91087  | 30. 37362 | 6. 33E-96  | 2. 14E-94  | 207. 1165 |
| CYP2B7P     | 1. 393675 | 0. 891893 | 15. 87927 | 3. 38E-42  | 2. 13E-41  | 83. 28136 |
| CYP2S1      | 4. 458193 | 2. 454986 | 35. 12855 | 2. 21E-111 | 1. 81E-109 | 242. 7837 |
| AXL         | 3. 024747 | 2. 785549 | 34. 32897 | 7. 21E-109 | 5. 09E-107 | 236. 9816 |
| HNRNPUL1    | 1. 502121 | 5. 588394 | 22. 47241 | 1. 38E-67  | 1. 59E-66  | 141. 762  |
| TGFB1       | 2. 813924 | 4. 094532 | 32. 97184 | 1. 60E-104 | 8. 66E-103 | 226. 9541 |
| CCDC97      | 1. 176535 | 3. 441924 | 21. 30472 | 3. 72E-63  | 3. 80E-62  | 131. 5473 |
| B9D2        | 1. 530038 | 2. 257455 | 29. 64278 | 1. 93E-93  | 5. 80E-92  | 201. 3842 |
| BCKDHA      | 1. 014415 | 4. 05708  | 16. 20254 | 1. 91E-43  | 1. 23E-42  | 86. 15381 |
| B3GNT8      | 1. 623983 | 1. 559375 | 25. 82255 | 5. 51E-80  | 9. 43E-79  | 170. 3488 |
| LINC01480   | 1. 125731 | 0. 857998 | 18. 44984 | 3. 70E-52  | 2. 88E-51  | 106. 2109 |
| AC006129. 2 | 1. 041775 | 0. 764293 | 13. 70751 | 6. 55E-34  | 3. 50E-33  | 64. 22633 |
| CEACAM21    | 1. 318387 | 0. 884459 | 21. 49801 | 6. 83E-64  | 7. 11E-63  | 133. 2457 |
| CEACAM5     | 6. 907393 | 3. 45929  | 32. 42575 | 9. 55E-103 | 4. 65E-101 | 222. 8547 |
| CEACAM7     | 2. 923771 | 2. 178633 | 18. 18359 | 3. 99E-51  | 3. 03E-50  | 103. 8329 |
| CEACAM6     | 7. 288499 | 4. 896718 | 45. 89229 | 3. 85E-142 | 3. 02E-139 | 313. 7735 |
| RPS19       | 1. 161828 | 10. 89224 | 10. 62053 | 9. 56E-23  | 4. 04E-22  | 38. 61252 |
| CD79A       | 2. 943485 | 1. 734763 | 19. 27877 | 2. 28E-55  | 1. 92E-54  | 113. 6045 |
| ARHGEF1     | 1. 261963 | 5. 540311 | 15. 18176 | 1. 63E-39  | 9. 75E-39  | 77. 10789 |
| RABAC1      | 1. 47447  | 6. 735422 | 19. 11035 | 1. 02E-54  | 8. 47E-54  | 112. 1039 |
| ZNF574      | 1. 49186  | 2. 520833 | 30. 59627 | 1. 12E-96  | 3. 96E-95  | 208. 8496 |
| DEDD2       | 1. 816038 | 4. 2741   | 26. 88138 | 8. 61E-84  | 1. 68E-82  | 179. 1272 |
| ZNF526      | 1. 237641 | 1. 740603 | 33. 84353 | 2. 52E-107 | 1. 60E-105 | 233. 4209 |
| GSK3A       | 1. 665997 | 4. 842932 | 28. 01088 | 8. 69E-88  | 1. 98E-86  | 188. 3441 |
| ERF         | 1. 47458  | 4. 336872 | 20. 12216 | 1. 27E-58  | 1. 15E-57  | 121. 1016 |
| PAFAH1B3    | 2. 209729 | 4. 025275 | 30. 92192 | 9. 04E-98  | 3. 36E-96  | 211. 3733 |
| CNFN        | 1. 096894 | 1. 458986 | 13. 17789 | 6. 27E-32  | 3. 22E-31  | 59. 67613 |
| LIPE-AS1    | 1. 161799 | 2. 435728 | 17. 63632 | 5. 30E-49  | 3. 85E-48  | 98. 94349 |
| LIPE        | 1. 220837 | 2. 215519 | 13. 01097 | 2. 61E-31  | 1. 32E-30  | 58. 25264 |
| CXCL17      | 1. 35814  | 4. 708375 | 7. 482228 | 7. 24E-13  | 2. 42E-12  | 16. 06593 |
| CEACAM1     | 3. 781304 | 2. 804479 | 38. 63439 | 5. 14E-122 | 8. 21E-120 | 267. 3209 |
| LYPD3       | 2. 426657 | 1. 750955 | 21. 6731  | 1. 47E-64  | 1. 56E-63  | 134. 7816 |
| ETHE1       | 2. 301472 | 4. 995592 | 28. 06343 | 5. 68E-88  | 1. 31E-86  | 188. 7692 |
| XRCC1       | 1. 512628 | 4. 01269  | 23. 98659 | 2. 97E-73  | 4. 07E-72  | 154. 8264 |
| PINLYP      | 1. 591443 | 1. 735963 | 22. 91339 | 3. 01E-69  | 3. 65E-68  | 145. 5893 |
| ZNF576      | 1. 635509 | 2. 921441 | 31. 71366 | 2. 09E-100 | 8. 93E-99  | 217. 4534 |
| ZNF428      | 1. 417372 | 4. 304145 | 23. 559   | 1. 16E-71  | 1. 50E-70  | 151. 1597 |
| PLAUR       | 5. 125348 | 4. 097683 | 54. 35569 | 7. 77E-163 | 3. 13E-159 | 361. 5423 |
| SMG9        | 2. 285757 | 4. 164999 | 33. 31516 | 1. 24E-105 | 7. 21E-104 | 229. 5123 |
| KCNN4       | 5. 732367 | 3. 358642 | 56. 85769 | 1. 84E-168 | 1. 01E-164 | 374. 5305 |
| LYPD5       | 1. 391567 | 0. 894414 | 28. 66184 | 4. 64E-90  | 1. 19E-88  | 193. 5853 |
| ZNF45       | 1. 040761 | 1. 894899 | 21. 57249 | 3. 55E-64  | 3. 73E-63  | 133. 8993 |
| ZNF226      | 1. 468733 | 2. 911853 | 26. 19737 | 2. 44E-81  | 4. 36E-80  | 173. 4713 |

|             |           |           |           |            |            |           |
|-------------|-----------|-----------|-----------|------------|------------|-----------|
| ZNF227      | 1. 300451 | 2. 234079 | 25. 31972 | 3. 70E-78  | 5. 99E-77  | 166. 1345 |
| PVR         | 1. 462365 | 3. 730555 | 19. 71937 | 4. 53E-57  | 3. 97E-56  | 117. 5252 |
| BCL3        | 1. 334309 | 5. 104227 | 11. 84638 | 4. 68E-27  | 2. 17E-26  | 48. 49074 |
| CBLC        | 1. 829569 | 3. 894702 | 18. 91067 | 6. 06E-54  | 4. 92E-53  | 110. 3236 |
| PVRL2       | 2. 76641  | 5. 578286 | 34. 78559 | 2. 62E-110 | 1. 99E-108 | 240. 3046 |
| TOMM40      | 1. 766152 | 4. 218252 | 29. 59845 | 2. 74E-93  | 8. 15E-92  | 201. 0344 |
| APOE        | 4. 198903 | 5. 644957 | 30. 31486 | 1. 00E-95  | 3. 34E-94  | 206. 6582 |
| APOC1       | 5. 244557 | 4. 991724 | 37. 57332 | 7. 29E-119 | 9. 57E-117 | 260. 0469 |
| APOC4-APOC2 | 2. 947698 | 2. 005579 | 28. 45339 | 2. 46E-89  | 6. 05E-88  | 191. 9127 |
| APOC2       | 2. 597262 | 1. 584124 | 27. 70225 | 1. 06E-86  | 2. 31E-85  | 185. 8411 |
| CLPTM1      | 1. 227257 | 5. 559035 | 18. 35995 | 8. 26E-52  | 6. 38E-51  | 105. 4082 |
| RELB        | 2. 158187 | 3. 645237 | 23. 82808 | 1. 15E-72  | 1. 55E-71  | 153. 4692 |
| ZNF296      | 1. 1975   | 0. 911147 | 24. 35104 | 1. 33E-74  | 1. 91E-73  | 157. 9368 |
| GEMIN7      | 1. 624785 | 3. 594856 | 27. 10981 | 1. 32E-84  | 2. 66E-83  | 181. 0036 |
| MARK4       | 1. 163822 | 3. 218906 | 21. 78507 | 5. 52E-65  | 5. 94E-64  | 135. 7626 |
| PPP1R37     | 1. 337409 | 3. 797237 | 19. 66777 | 7. 17E-57  | 6. 24E-56  | 117. 0664 |
| TRAPPC6A    | 1. 983181 | 4. 471121 | 28. 26352 | 1. 13E-88  | 2. 69E-87  | 190. 3845 |
| BLOC1S3     | 1. 488112 | 2. 395676 | 32. 68249 | 1. 39E-103 | 7. 19E-102 | 224. 7866 |
| CKM         | -1. 01823 | 0. 798565 | -12. 6113 | 7. 79E-30  | 3. 82E-29  | 54. 86753 |
| ERCC2       | 1. 294528 | 3. 276118 | 24. 33874 | 1. 48E-74  | 2. 11E-73  | 157. 8319 |
| PPP1R13L    | 2. 164442 | 4. 85292  | 23. 55717 | 1. 17E-71  | 1. 52E-70  | 151. 144  |
| CD3EAP      | 1. 077921 | 1. 554388 | 20. 54229 | 3. 08E-60  | 2. 92E-59  | 124. 8227 |
| ERCC1       | 1. 391614 | 5. 109958 | 22. 86972 | 4. 40E-69  | 5. 31E-68  | 145. 2111 |
| FOSB        | 2. 265766 | 2. 698099 | 12. 7132  | 3. 29E-30  | 1. 63E-29  | 55. 72732 |
| RTN2        | 2. 170893 | 2. 737873 | 33. 6641  | 9. 43E-107 | 5. 81E-105 | 232. 0975 |
| PPM1N       | 1. 970224 | 1. 326418 | 30. 5758  | 1. 32E-96  | 4. 62E-95  | 208. 6906 |
| VASP        | 3. 59448  | 5. 195308 | 44. 67516 | 6. 23E-139 | 3. 63E-136 | 306. 365  |
| OPA3        | 1. 186516 | 1. 852161 | 29. 19082 | 6. 87E-92  | 1. 92E-90  | 197. 8058 |
| GPR4        | 1. 182784 | 1. 798307 | 18. 40538 | 5. 50E-52  | 4. 27E-51  | 105. 8139 |
| EML2        | 1. 267556 | 4. 744516 | 17. 82895 | 9. 48E-50  | 7. 00E-49  | 100. 6646 |
| SNRPD2      | 2. 148576 | 7. 108554 | 27. 23416 | 4. 78E-85  | 9. 76E-84  | 182. 0225 |
| FBXO46      | 1. 074109 | 2. 718743 | 18. 3674  | 7. 73E-52  | 5. 97E-51  | 105. 4747 |
| SIX5        | -1. 02823 | 3. 541958 | -13. 2096 | 4. 78E-32  | 2. 46E-31  | 59. 94742 |
| AC074212. 6 | -1. 15635 | 1. 550203 | -21. 1838 | 1. 08E-62  | 1. 09E-61  | 130. 4835 |
| DMWD        | 1. 015643 | 3. 652076 | 17. 31504 | 9. 35E-48  | 6. 61E-47  | 96. 07342 |
| SYMPK       | 1. 494143 | 4. 656634 | 21. 24091 | 6. 53E-63  | 6. 63E-62  | 130. 986  |
| IRF2BP1     | 1. 005651 | 3. 221932 | 17. 74762 | 1. 96E-49  | 1. 44E-48  | 99. 93783 |
| CCDC61      | 1. 192965 | 2. 881771 | 21. 31693 | 3. 35E-63  | 3. 42E-62  | 131. 6546 |
| IGFL2       | 4. 268593 | 2. 086535 | 34. 50565 | 1. 99E-109 | 1. 46E-107 | 238. 2704 |
| AC006262. 5 | 1. 695724 | 0. 861188 | 12. 8085  | 1. 46E-30  | 7. 30E-30  | 56. 53351 |
| KFZp434J022 | 1. 070948 | 0. 717454 | 16. 10015 | 4. 75E-43  | 3. 04E-42  | 85. 24339 |
| IGFL1       | 1. 331634 | 0. 652883 | 10. 44227 | 3. 89E-22  | 1. 62E-21  | 37. 21705 |
| PPP5C       | 1. 274819 | 4. 663611 | 20. 13391 | 1. 15E-58  | 1. 04E-57  | 121. 2057 |
| CALM3       | 1. 783412 | 6. 34778  | 25. 70299 | 1. 49E-79  | 2. 52E-78  | 169. 3494 |
| DACT3       | 1. 926818 | 1. 436989 | 27. 28734 | 3. 10E-85  | 6. 37E-84  | 182. 4577 |
| PRKD2       | 1. 838287 | 4. 535579 | 25. 72153 | 1. 28E-79  | 2. 17E-78  | 169. 5045 |
| STRN4       | 1. 003397 | 4. 862723 | 14. 99814 | 8. 25E-39  | 4. 86E-38  | 75. 48967 |
| SLC1A5      | 2. 492746 | 4. 809547 | 28. 51542 | 1. 50E-89  | 3. 72E-88  | 192. 411  |
| AP2S1       | 2. 084411 | 5. 878888 | 30. 07628 | 6. 44E-95  | 2. 08E-93  | 204. 7924 |
| ARHGAP35    | 1. 060318 | 2. 907312 | 18. 02271 | 1. 68E-50  | 1. 26E-49  | 102. 3957 |
| ZC3H4       | 1. 012769 | 2. 97737  | 18. 38855 | 6. 40E-52  | 4. 95E-51  | 105. 6636 |
| SAE1        | 2. 14237  | 4. 572928 | 34. 50911 | 1. 94E-109 | 1. 42E-107 | 238. 2956 |
| BBC3        | 1. 368913 | 3. 0333   | 15. 41974 | 1. 99E-40  | 1. 21E-39  | 79. 20985 |
| C5AR1       | 2. 045653 | 2. 429074 | 21. 69923 | 1. 17E-64  | 1. 25E-63  | 135. 0107 |

|          |           |           |           |            |            |           |
|----------|-----------|-----------|-----------|------------|------------|-----------|
| MEIS3    | 2. 186664 | 2. 522982 | 25. 79627 | 6. 86E-80  | 1. 17E-78  | 170. 1292 |
| NAPA     | 1. 247616 | 6. 072765 | 18. 59546 | 1. 01E-52  | 7. 95E-52  | 107. 511  |
| EHD2     | 2. 074471 | 4. 512184 | 25. 92504 | 2. 34E-80  | 4. 06E-79  | 171. 2042 |
| SEPW1    | 2. 537789 | 7. 400218 | 30. 44402 | 3. 66E-96  | 1. 26E-94  | 207. 6652 |
| EMP3     | 3. 753591 | 4. 522007 | 40. 15677 | 1. 93E-126 | 4. 06E-124 | 277. 5333 |
| KDELR1   | 1. 868174 | 6. 559773 | 26. 38386 | 5. 20E-82  | 9. 56E-81  | 175. 0188 |
| GRIN2D   | 1. 938198 | 1. 024496 | 24. 26946 | 2. 66E-74  | 3. 78E-73  | 157. 2417 |
| GRWD1    | 1. 303514 | 3. 377771 | 22. 51933 | 9. 17E-68  | 1. 06E-66  | 142. 1701 |
| CYTH2    | 1. 816475 | 5. 005883 | 25. 76461 | 8. 93E-80  | 1. 52E-78  | 169. 8646 |
| SULT2B1  | 2. 823291 | 1. 73284  | 27. 99238 | 1. 01E-87  | 2. 29E-86  | 188. 1945 |
| FAM83E   | 4. 275324 | 2. 740607 | 40. 66992 | 6. 61E-128 | 1. 54E-125 | 280. 9174 |
| DBP      | 1. 416832 | 3. 16508  | 17. 58756 | 8. 20E-49  | 5. 93E-48  | 98. 50777 |
| CA11     | 1. 118421 | 2. 826644 | 17. 36952 | 5. 75E-48  | 4. 08E-47  | 96. 56007 |
| FUT2     | 2. 591779 | 3. 411175 | 20. 99824 | 5. 52E-62  | 5. 46E-61  | 128. 8489 |
| IZUMO1   | -1. 6076  | 1. 039476 | -20. 2614 | 3. 70E-59  | 3. 40E-58  | 122. 3362 |
| FUT1     | -1. 49697 | 2. 308132 | -17. 5898 | 8. 03E-49  | 5. 81E-48  | 98. 52806 |
| HSD17B14 | 2. 202189 | 2. 223058 | 28. 05817 | 5. 93E-88  | 1. 36E-86  | 188. 7267 |
| PLEKHA4  | 2. 239994 | 3. 621712 | 29. 4609  | 8. 11E-93  | 2. 35E-91  | 199. 9472 |
| PPP1R15A | 2. 527278 | 4. 577991 | 26. 60745 | 8. 20E-83  | 1. 55E-81  | 176. 8688 |
| NUCB1    | 1. 95161  | 6. 867974 | 25. 45343 | 1. 21E-78  | 1. 98E-77  | 167. 2579 |
| DHDH     | 1. 243545 | 0. 783552 | 12. 16095 | 3. 43E-28  | 1. 63E-27  | 51. 09574 |
| BAX      | 2. 643572 | 5. 658305 | 35. 47322 | 1. 86E-112 | 1. 62E-110 | 245. 2608 |
| FTL      | 2. 668615 | 10. 6681  | 25. 34727 | 2. 94E-78  | 4. 76E-77  | 166. 3662 |
| GYS1     | 1. 417558 | 3. 45639  | 23. 82921 | 1. 14E-72  | 1. 53E-71  | 153. 479  |
| RUVBL2   | 1. 81007  | 4. 958985 | 28. 75712 | 2. 17E-90  | 5. 62E-89  | 194. 3481 |
| LHB      | -1. 18164 | 1. 781425 | -11. 066  | 2. 74E-24  | 1. 20E-23  | 42. 14758 |
| CGB      | 1. 295987 | 0. 62609  | 8. 235637 | 4. 72E-15  | 1. 67E-14  | 21. 03632 |
| CGB5     | 3. 102327 | 1. 484232 | 15. 22349 | 1. 13E-39  | 6. 76E-39  | 77. 47612 |
| CGB8     | 2. 270053 | 1. 083219 | 15. 41504 | 2. 08E-40  | 1. 26E-39  | 79. 16829 |
| CGB7     | 1. 27329  | 0. 731999 | 15. 41138 | 2. 14E-40  | 1. 30E-39  | 79. 13596 |
| NTF4     | 1. 363906 | 0. 689395 | 17. 14581 | 4. 24E-47  | 2. 96E-46  | 94. 56225 |
| TRPM4    | 2. 003137 | 4. 010089 | 23. 61082 | 7. 41E-72  | 9. 67E-71  | 151. 605  |
| SLC6A16  | -1. 13725 | 1. 3307   | -21. 6765 | 1. 43E-64  | 1. 52E-63  | 134. 8118 |
| CD37     | 2. 865815 | 3. 394977 | 25. 42652 | 1. 51E-78  | 2. 47E-77  | 167. 032  |
| CCDC155  | -1. 04096 | 0. 676977 | -27. 9424 | 1. 51E-87  | 3. 40E-86  | 187. 7898 |
| PIH1D1   | 1. 389883 | 5. 384487 | 22. 31281 | 5. 52E-67  | 6. 27E-66  | 140. 3725 |
| FLT3LG   | 1. 859662 | 2. 471672 | 27. 57026 | 3. 09E-86  | 6. 61E-85  | 184. 767  |
| RPS11    | 1. 242981 | 10. 82167 | 12. 22567 | 1. 99E-28  | 9. 54E-28  | 51. 63474 |
| FCGRT    | 1. 936843 | 6. 07583  | 27. 35208 | 1. 83E-85  | 3. 79E-84  | 182. 987  |
| RCN3     | 3. 247425 | 4. 169111 | 32. 2841  | 2. 78E-102 | 1. 32E-100 | 221. 7853 |
| PRRG2    | 1. 037457 | 3. 180855 | 17. 24756 | 1. 71E-47  | 1. 20E-46  | 95. 47075 |
| PRR12    | 1. 273127 | 2. 950849 | 21. 54016 | 4. 72E-64  | 4. 94E-63  | 133. 6157 |
| RRAS     | 3. 208804 | 5. 183081 | 38. 56179 | 8. 41E-122 | 1. 33E-119 | 266. 8273 |
| SCAF1    | 1. 546172 | 3. 862922 | 27. 01251 | 2. 93E-84  | 5. 84E-83  | 180. 2052 |
| IRF3     | 1. 104271 | 5. 644632 | 13. 6754  | 8. 65E-34  | 4. 61E-33  | 63. 94905 |
| BCL2L12  | 1. 283824 | 3. 607856 | 21. 92139 | 1. 68E-65  | 1. 83E-64  | 136. 9556 |
| PRMT1    | 1. 645912 | 5. 869081 | 22. 62699 | 3. 60E-68  | 4. 23E-67  | 143. 1056 |
| CPT1C    | 1. 823392 | 2. 145893 | 23. 39277 | 4. 82E-71  | 6. 16E-70  | 149. 7293 |
| AP2A1    | 1. 21113  | 4. 986534 | 16. 70601 | 2. 15E-45  | 1. 45E-44  | 90. 63798 |
| MED25    | 1. 177834 | 4. 462045 | 18. 22221 | 2. 83E-51  | 2. 15E-50  | 104. 1779 |
| AKT1S1   | 1. 1998   | 4. 428326 | 20. 06011 | 2. 20E-58  | 1. 99E-57  | 120. 5511 |
| IL4I1    | 2. 361113 | 1. 463022 | 32. 17389 | 6. 38E-102 | 2. 96E-100 | 220. 9516 |
| NUP62    | 1. 657573 | 4. 000805 | 27. 89137 | 2. 28E-87  | 5. 11E-86  | 187. 3763 |
| ATF5     | 1. 367927 | 3. 872549 | 18. 70415 | 3. 82E-53  | 3. 04E-52  | 108. 4811 |

|               |           |           |           |            |            |           |
|---------------|-----------|-----------|-----------|------------|------------|-----------|
| VRK3          | 1. 134874 | 4. 095564 | 18. 97984 | 3. 27E-54  | 2. 67E-53  | 110. 9404 |
| MYH14         | 3. 273389 | 4. 668228 | 37. 05615 | 2. 63E-117 | 3. 10E-115 | 256. 4541 |
| CTB-191K22. 5 | 4. 367314 | 3. 323773 | 35. 30013 | 6. 43E-112 | 5. 45E-110 | 244. 0186 |
| NR1H2         | 1. 575876 | 4. 870024 | 24. 63801 | 1. 16E-75  | 1. 73E-74  | 160. 376  |
| NAPSB         | 3. 07283  | 2. 284742 | 28. 3561  | 5. 38E-89  | 1. 30E-87  | 191. 1302 |
| POLD1         | 1. 522679 | 3. 236006 | 21. 40392 | 1. 56E-63  | 1. 61E-62  | 132. 4193 |
| SPIB          | 1. 974866 | 1. 49847  | 17. 18095 | 3. 10E-47  | 2. 17E-46  | 94. 87595 |
| EMC10         | 1. 880363 | 5. 858947 | 25. 3043  | 4. 21E-78  | 6. 80E-77  | 166. 0049 |
| CTD-2545M3. 2 | 1. 085265 | 0. 540551 | 7. 149881 | 6. 02E-12  | 1. 96E-11  | 13. 97901 |
| JOSD2         | 1. 685413 | 4. 424797 | 21. 47917 | 8. 05E-64  | 8. 38E-63  | 133. 0802 |
| CLEC11A       | 2. 879154 | 3. 272454 | 32. 86989 | 3. 42E-104 | 1. 82E-102 | 226. 1916 |
| KLK1          | -5. 36136 | 7. 908963 | -24. 0786 | 1. 35E-73  | 1. 88E-72  | 155. 6132 |
| KLK6          | 4. 923791 | 2. 395888 | 30. 31865 | 9. 71E-96  | 3. 25E-94  | 206. 6878 |
| KLK7          | 4. 318136 | 2. 141792 | 25. 40386 | 1. 83E-78  | 2. 99E-77  | 166. 8417 |
| KLK8          | 3. 832969 | 1. 914274 | 22. 52587 | 8. 66E-68  | 1. 01E-66  | 142. 2269 |
| KLK10         | 5. 635715 | 3. 034614 | 39. 10961 | 2. 08E-123 | 3. 55E-121 | 270. 5368 |
| CTC-518B2. 1  | 1. 835006 | 0. 890978 | 16. 584   | 6. 38E-45  | 4. 26E-44  | 89. 55034 |
| KLK11         | 1. 280606 | 4. 790283 | 9. 24897  | 3. 43E-18  | 1. 31E-17  | 28. 19459 |
| SIGLEC9       | 1. 074324 | 1. 207908 | 9. 631802 | 1. 98E-19  | 7. 80E-19  | 31. 02489 |
| SIGLEC7       | 1. 273912 | 0. 980976 | 20. 74321 | 5. 23E-61  | 5. 06E-60  | 126. 5986 |
| CD33          | 1. 150016 | 1. 635146 | 9. 735581 | 9. 04E-20  | 3. 59E-19  | 31. 80304 |
| VSIG10L       | 1. 447163 | 1. 077642 | 22. 8534  | 5. 06E-69  | 6. 10E-68  | 145. 0697 |
| ETFB          | 2. 243981 | 5. 794917 | 29. 48151 | 6. 89E-93  | 2. 01E-91  | 200. 1103 |
| NKG7          | 2. 445258 | 1. 959138 | 27. 32646 | 2. 25E-85  | 4. 66E-84  | 182. 7776 |
| SIGLEC10      | 1. 411026 | 1. 67861  | 14. 1002  | 2. 16E-35  | 1. 19E-34  | 67. 62975 |
| SIGLEC14      | 1. 247753 | 0. 942993 | 16. 04907 | 7. 48E-43  | 4. 78E-42  | 84. 78934 |
| HAS1          | 1. 116592 | 0. 697723 | 11. 10618 | 1. 98E-24  | 8. 68E-24  | 42. 46986 |
| FPR1          | 2. 174135 | 2. 024171 | 21. 75915 | 6. 93E-65  | 7. 43E-64  | 135. 5356 |
| FPR3          | 2. 456478 | 1. 813827 | 25. 50877 | 7. 58E-79  | 1. 25E-77  | 167. 7223 |
| ZNF649        | 1. 021511 | 1. 534176 | 18. 55502 | 1. 45E-52  | 1. 13E-51  | 107. 15   |
| ZNF350        | 1. 011672 | 2. 001483 | 20. 49949 | 4. 50E-60  | 4. 24E-59  | 124. 4441 |
| ZNF836        | 1. 132895 | 2. 288166 | 21. 24053 | 6. 55E-63  | 6. 65E-62  | 130. 9827 |
| PPP2R1A       | 2. 237689 | 6. 290613 | 31. 37858 | 2. 70E-99  | 1. 08E-97  | 214. 8897 |
| ZNF766        | 1. 227178 | 2. 221273 | 24. 15588 | 7. 00E-74  | 9. 82E-73  | 156. 2729 |
| ZNF480        | 1. 815201 | 2. 324171 | 32. 40873 | 1. 09E-102 | 5. 25E-101 | 222. 7264 |
| ZNF880        | 1. 455584 | 2. 517866 | 21. 70599 | 1. 10E-64  | 1. 18E-63  | 135. 0699 |
| RPL39P34      | 1. 079913 | 1. 662465 | 7. 41753  | 1. 10E-12  | 3. 65E-12  | 15. 65441 |
| ZNF28         | 1. 343036 | 2. 274874 | 20. 00379 | 3. 63E-58  | 3. 26E-57  | 120. 0514 |
| ZNF468        | 1. 086713 | 2. 102407 | 18. 21961 | 2. 89E-51  | 2. 20E-50  | 104. 1548 |
| ZNF816        | 1. 128548 | 1. 939929 | 18. 87124 | 8. 62E-54  | 6. 96E-53  | 109. 9719 |
| MYADM         | 3. 012924 | 4. 900239 | 33. 76662 | 4. 43E-107 | 2. 79E-105 | 232. 8542 |
| OSCAR         | 2. 216069 | 1. 623255 | 28. 60562 | 7. 28E-90  | 1. 84E-88  | 193. 1348 |
| NDUFA3        | 1. 840842 | 6. 559413 | 25. 53943 | 5. 87E-79  | 9. 72E-78  | 167. 9795 |
| TFPT          | 2. 601465 | 3. 384632 | 39. 34865 | 4. 18E-124 | 7. 41E-122 | 272. 1447 |
| PRPF31        | 1. 651211 | 4. 514465 | 28. 92279 | 5. 78E-91  | 1. 54E-89  | 195. 6717 |
| LENG1         | 1. 050462 | 2. 705452 | 20. 36277 | 1. 51E-59  | 1. 40E-58  | 123. 2339 |
| TMC4          | 1. 15735  | 5. 427773 | 12. 89737 | 6. 88E-31  | 3. 45E-30  | 57. 28707 |
| MBOAT7        | 1. 693311 | 4. 878183 | 21. 21584 | 8. 13E-63  | 8. 25E-62  | 130. 7654 |
| TSEN34        | 1. 240762 | 4. 694365 | 19. 39409 | 8. 17E-56  | 6. 93E-55  | 114. 6315 |
| LILRB3        | 1. 070285 | 1. 927702 | 11. 07474 | 2. 55E-24  | 1. 12E-23  | 42. 21784 |
| LILRA6        | 1. 136458 | 1. 211056 | 14. 46202 | 9. 18E-37  | 5. 18E-36  | 70. 78509 |
| LILRB2        | 1. 514168 | 1. 555341 | 18. 81705 | 1. 40E-53  | 1. 12E-52  | 109. 4885 |
| LILRA5        | 1. 355923 | 1. 143006 | 18. 05167 | 1. 30E-50  | 9. 72E-50  | 102. 6545 |
| LAIR1         | 2. 434497 | 2. 912939 | 23. 10103 | 5. 96E-70  | 7. 37E-69  | 147. 2124 |

|             |          |          |          |           |           |          |
|-------------|----------|----------|----------|-----------|-----------|----------|
| TTYH1       | -1.43979 | 2.956135 | -13.4013 | 9.21E-33  | 4.81E-32  | 61.58947 |
| LENG8       | -1.24651 | 6.516608 | -11.7549 | 9.96E-27  | 4.59E-26  | 47.73829 |
| CDC42EP5    | 3.696121 | 4.454804 | 35.1458  | 1.95E-111 | 1.60E-109 | 242.908  |
| LILRA2      | 1.317375 | 1.181121 | 18.1298  | 6.45E-51  | 4.87E-50  | 103.3525 |
| LILRB1      | 1.073805 | 1.289704 | 13.38447 | 1.06E-32  | 5.55E-32  | 61.44506 |
| LILRB4      | 2.723299 | 2.106367 | 28.80292 | 1.50E-90  | 3.94E-89  | 194.7143 |
| RDH13       | 1.234236 | 3.736931 | 16.53979 | 9.46E-45  | 6.29E-44  | 89.15635 |
| EPS8L1      | 3.079714 | 5.308663 | 26.79821 | 1.70E-83  | 3.30E-82  | 178.4425 |
| TNNT1       | 2.070622 | 1.842615 | 13.07198 | 1.55E-31  | 7.89E-31  | 58.77234 |
| PTPRH       | 2.825433 | 2.965922 | 28.22679 | 1.52E-88  | 3.59E-87  | 190.0883 |
| PPP6R1      | 2.183396 | 4.233797 | 34.82397 | 1.98E-110 | 1.53E-108 | 240.5828 |
| HSPBP1      | 1.586785 | 4.224103 | 25.03135 | 4.19E-77  | 6.51E-76  | 163.7048 |
| TMEM150B    | 2.247674 | 1.324809 | 22.07057 | 4.56E-66  | 5.04E-65  | 138.2593 |
| COX6B2      | 2.381713 | 1.3524   | 20.68204 | 8.97E-61  | 8.62E-60  | 126.0581 |
| IL11        | 1.524141 | 0.9192   | 19.05294 | 1.71E-54  | 1.40E-53  | 111.5922 |
| RPL28       | 1.819621 | 10.19581 | 17.19492 | 2.73E-47  | 1.92E-46  | 95.0007  |
| UBE2S       | 3.205287 | 3.291239 | 46.49609 | 1.04E-143 | 8.96E-141 | 317.3953 |
| ISOC2       | 1.530237 | 4.92307  | 23.88753 | 6.92E-73  | 9.37E-72  | 153.9786 |
| NAT14       | 2.109511 | 3.255063 | 28.04768 | 6.45E-88  | 1.48E-86  | 188.6418 |
| SSC5D       | 2.676749 | 1.985089 | 30.94424 | 7.61E-98  | 2.84E-96  | 211.5458 |
| CCDC106     | 1.250226 | 2.789154 | 19.22319 | 3.74E-55  | 3.13E-54  | 113.1094 |
| U2AF2       | 1.20666  | 5.961041 | 16.53635 | 9.76E-45  | 6.48E-44  | 89.12569 |
| TC-444N24.8 | 1.250949 | 1.805276 | 26.50918 | 1.85E-82  | 3.44E-81  | 176.0564 |
| TRAPPC2B    | 2.125619 | 2.792062 | 39.92137 | 9.18E-126 | 1.85E-123 | 275.9712 |
| ZNF416      | 1.09578  | 1.089152 | 32.56945 | 3.24E-103 | 1.63E-101 | 223.937  |
| ZNF134      | 1.233722 | 2.047714 | 21.39047 | 1.75E-63  | 1.81E-62  | 132.301  |
| ZNF586      | 1.04571  | 1.841449 | 21.61769 | 2.39E-64  | 2.52E-63  | 134.2958 |
| ZNF552      | 1.046564 | 1.870534 | 19.81929 | 1.87E-57  | 1.65E-56  | 118.413  |
| ZNF274      | 1.08622  | 2.955012 | 16.60389 | 5.34E-45  | 3.57E-44  | 89.72759 |
| ERVK3-1     | 1.183565 | 4.434159 | 21.03487 | 4.00E-62  | 3.97E-61  | 129.1718 |
| ZBTB45      | 1.094503 | 2.546953 | 21.11577 | 1.96E-62  | 1.96E-61  | 129.8845 |
| TRIM28      | 1.227581 | 7.297056 | 14.84729 | 3.12E-38  | 1.82E-37  | 74.16275 |
| CHMP2A      | 2.070814 | 6.512502 | 29.65462 | 1.76E-93  | 5.29E-92  | 201.4776 |
| UBE2M       | 1.776999 | 4.938939 | 28.74226 | 2.44E-90  | 6.32E-89  | 194.2292 |
| CENPBD1P1   | 1.099007 | 3.610004 | 19.60391 | 1.26E-56  | 1.09E-55  | 116.4985 |
| ZCCHC3      | 1.340483 | 2.594573 | 29.47889 | 7.03E-93  | 2.05E-91  | 200.0895 |
| NRSN2       | 1.260255 | 3.590052 | 16.64658 | 3.65E-45  | 2.45E-44  | 90.10811 |
| RBCK1       | 1.111601 | 5.65641  | 14.28159 | 4.45E-36  | 2.47E-35  | 69.20944 |
| CSNK2A1     | 1.41568  | 4.255002 | 21.52456 | 5.41E-64  | 5.65E-63  | 133.4787 |
| SRXN1       | 1.363758 | 3.356376 | 19.62446 | 1.05E-56  | 9.14E-56  | 116.6813 |
| SLC52A3     | 2.408873 | 1.753289 | 36.70923 | 2.96E-116 | 3.32E-114 | 254.0264 |
| FAM110A     | 2.086054 | 2.567528 | 30.91006 | 9.91E-98  | 3.67E-96  | 211.2816 |
| PSMF1       | 1.290755 | 5.678321 | 18.21379 | 3.05E-51  | 2.32E-50  | 104.1027 |
| SDCBP2      | 3.38474  | 4.460975 | 28.62443 | 6.26E-90  | 1.59E-88  | 193.2855 |
| FKBP1A      | 2.047784 | 6.504833 | 28.13213 | 3.27E-88  | 7.58E-87  | 189.3243 |
| NSFL1C      | 1.849733 | 4.748856 | 30.31136 | 1.03E-95  | 3.43E-94  | 206.6308 |
| SIRPB2      | 1.0452   | 1.069475 | 15.26603 | 7.76E-40  | 4.66E-39  | 77.85164 |
| SIRPB1      | 1.266435 | 0.96687  | 16.44049 | 2.29E-44  | 1.51E-43  | 88.27171 |
| SIRPG       | 1.323138 | 0.764399 | 20.296   | 2.72E-59  | 2.51E-58  | 122.6425 |
| SIRPA       | 1.838856 | 3.397038 | 21.97676 | 1.03E-65  | 1.13E-64  | 137.4397 |
| SNRPB       | 2.505045 | 6.045551 | 34.80917 | 2.21E-110 | 1.69E-108 | 240.4755 |
| CPXM1       | 3.263187 | 2.576932 | 28.75588 | 2.19E-90  | 5.68E-89  | 194.3382 |
| PTPRA       | 1.814903 | 4.066006 | 29.84292 | 4.01E-94  | 1.24E-92  | 202.9607 |
| FASTKD5     | 1.251652 | 2.114226 | 26.04061 | 8.96E-81  | 1.57E-79  | 172.1673 |

|              |          |          |          |           |           |          |
|--------------|----------|----------|----------|-----------|-----------|----------|
| ITPA         | 1.7359   | 5.041946 | 24.8066  | 2.79E-76  | 4.24E-75  | 161.8048 |
| SLC4A11      | 2.602887 | 1.556511 | 30.36979 | 6.52E-96  | 2.20E-94  | 207.0867 |
| SIGLEC1      | 1.368104 | 1.328498 | 16.33626 | 5.80E-44  | 3.79E-43  | 87.34373 |
| HSPA12B      | 1.125656 | 1.539763 | 18.11941 | 7.08E-51  | 5.34E-50  | 103.2596 |
| C20orf27     | 1.510013 | 3.924881 | 24.127   | 8.95E-74  | 1.25E-72  | 156.0263 |
| CENPB        | 1.625701 | 4.708569 | 25.66238 | 2.10E-79  | 3.52E-78  | 169.0095 |
| CDC25B       | 1.792934 | 3.510571 | 22.44491 | 1.75E-67  | 2.02E-66  | 141.5228 |
| PANK2        | 1.391137 | 3.622597 | 24.40066 | 8.72E-75  | 1.26E-73  | 158.3591 |
| RNF24        | 1.497266 | 2.111636 | 21.18103 | 1.10E-62  | 1.12E-61  | 130.4591 |
| SMOX         | 2.166915 | 3.402795 | 28.86256 | 9.35E-91  | 2.47E-89  | 195.1909 |
| PRNP         | 2.349567 | 4.347305 | 30.29297 | 1.19E-95  | 3.95E-94  | 206.4873 |
| RASSF2       | 2.13769  | 1.916961 | 24.40718 | 8.25E-75  | 1.19E-73  | 158.4146 |
| TMEM230      | 1.440136 | 5.596928 | 22.60396 | 4.40E-68  | 5.15E-67  | 142.9056 |
| PCNA         | 2.092514 | 4.674418 | 30.41272 | 4.67E-96  | 1.60E-94  | 207.4214 |
| CDS2         | 1.650151 | 2.886706 | 30.24243 | 1.76E-95  | 5.82E-94  | 206.0926 |
| C20orf196    | 1.266081 | 2.13812  | 26.54003 | 1.43E-82  | 2.68E-81  | 176.3116 |
| CHGB         | 1.182323 | 4.337728 | 5.867443 | 1.11E-08  | 3.24E-08  | 6.599197 |
| TRMT6        | 1.129696 | 2.640724 | 22.54811 | 7.14E-68  | 8.31E-67  | 142.4203 |
| CRLS1        | 1.170915 | 4.896002 | 19.58385 | 1.51E-56  | 1.31E-55  | 116.3201 |
| FERMT1       | 3.366397 | 2.395132 | 44.08394 | 2.38E-137 | 1.20E-134 | 302.7132 |
| BMP2         | 1.747762 | 2.264943 | 24.45591 | 5.45E-75  | 7.93E-74  | 158.8291 |
| TMX4         | 1.474267 | 2.984283 | 23.11082 | 5.47E-70  | 6.79E-69  | 147.297  |
| PLCB4        | 1.580907 | 1.393703 | 21.39457 | 1.69E-63  | 1.74E-62  | 132.3371 |
| LAMP5        | 3.859895 | 2.056403 | 41.1139  | 3.64E-129 | 9.67E-127 | 283.822  |
| MKKS         | 1.450737 | 3.557923 | 26.89134 | 7.93E-84  | 1.55E-82  | 179.2092 |
| JAG1         | 1.657309 | 4.064299 | 21.53294 | 5.02E-64  | 5.26E-63  | 133.5523 |
| ISM1         | 1.977553 | 2.080795 | 19.93108 | 6.92E-58  | 6.17E-57  | 119.4059 |
| ESF1         | 1.051138 | 2.275114 | 19.31064 | 1.72E-55  | 1.45E-54  | 113.8884 |
| NDUFAF5      | 1.122858 | 3.24848  | 21.66123 | 1.63E-64  | 1.73E-63  | 134.6776 |
| MACROD2      | 1.34459  | 1.331459 | 16.62169 | 4.56E-45  | 3.05E-44  | 89.88625 |
| FLRT3        | 1.696837 | 1.435891 | 21.12904 | 1.75E-62  | 1.75E-61  | 130.0014 |
| KIF16B       | 1.219871 | 2.082024 | 22.3591  | 3.69E-67  | 4.22E-66  | 140.7758 |
| SNRPB2       | 2.121167 | 4.301964 | 35.92348 | 7.54E-114 | 7.27E-112 | 248.4751 |
| PCSK2        | 1.027254 | 2.181023 | 6.628927 | 1.45E-10  | 4.53E-10  | 10.84765 |
| DSTN         | 1.315692 | 7.582913 | 15.83004 | 5.24E-42  | 3.29E-41  | 82.84443 |
| BANF2        | -1.08208 | 0.809066 | -16.998  | 1.59E-46  | 1.10E-45  | 93.24273 |
| SNX5         | 1.369087 | 5.088619 | 20.89723 | 1.34E-61  | 1.32E-60  | 127.9581 |
| OVOL2        | 1.32441  | 2.671653 | 18.57537 | 1.21E-52  | 9.49E-52  | 107.3317 |
| MGME1        | 1.279459 | 2.751301 | 24.38972 | 9.57E-75  | 1.38E-73  | 158.266  |
| PET117       | 1.223857 | 2.867265 | 24.03756 | 1.92E-73  | 2.65E-72  | 155.2622 |
| RBBP9        | 1.417364 | 2.02863  | 30.11307 | 4.83E-95  | 1.57E-93  | 205.0806 |
| LINC00493    | 1.096909 | 5.747557 | 16.72651 | 1.79E-45  | 1.21E-44  | 90.82075 |
| DTD1         | 1.664985 | 3.895975 | 29.63091 | 2.12E-93  | 6.34E-92  | 201.2905 |
| SLC24A3      | 2.278158 | 1.48898  | 34.78915 | 2.55E-110 | 1.94E-108 | 240.3304 |
| RP1-122P22.4 | 1.68892  | 0.951045 | 18.00148 | 2.03E-50  | 1.52E-49  | 102.2061 |
| RIN2         | 1.664145 | 3.419987 | 24.77787 | 3.56E-76  | 5.38E-75  | 161.5615 |
| NAA20        | 1.075564 | 5.237287 | 16.42264 | 2.69E-44  | 1.77E-43  | 88.11276 |
| CRNKL1       | 1.952164 | 3.175792 | 39.67366 | 4.77E-125 | 9.15E-123 | 274.3207 |
| XRN2         | 1.213911 | 4.239883 | 17.21408 | 2.30E-47  | 1.62E-46  | 95.17179 |
| LINC00261    | -1.68263 | 2.974161 | -16.1133 | 4.22E-43  | 2.71E-42  | 85.36041 |
| THBD         | 1.855985 | 2.72023  | 21.92641 | 1.60E-65  | 1.75E-64  | 136.9995 |
| CD93         | 2.251978 | 2.920161 | 25.17883 | 1.21E-77  | 1.92E-76  | 164.9487 |
| NXT1         | 1.970298 | 3.389821 | 34.61019 | 9.32E-110 | 6.93E-108 | 239.0312 |
| CST3         | 1.641194 | 8.691641 | 17.97261 | 2.63E-50  | 1.96E-49  | 101.9481 |

|              |          |          |          |           |           |          |
|--------------|----------|----------|----------|-----------|-----------|----------|
| CST4         | 1.962222 | 0.93741  | 19.21387 | 4.07E-55  | 3.40E-54  | 113.0264 |
| CST1         | 6.573765 | 3.187252 | 40.21964 | 1.28E-126 | 2.71E-124 | 277.9495 |
| CST2         | 4.205427 | 2.151661 | 35.48365 | 1.73E-112 | 1.50E-110 | 245.3355 |
| SYNDIG1      | 2.066158 | 1.181834 | 28.77697 | 1.85E-90  | 4.81E-89  | 194.5069 |
| CST7         | 2.630898 | 1.918895 | 30.14346 | 3.81E-95  | 1.24E-93  | 205.3185 |
| APMAP        | 1.744911 | 4.923652 | 27.64403 | 1.70E-86  | 3.68E-85  | 185.3676 |
| RP4-738P15.6 | 2.482913 | 2.241975 | 14.62935 | 2.12E-37  | 1.21E-36  | 72.24988 |
| PYGB         | 2.952597 | 4.883035 | 34.20092 | 1.83E-108 | 1.26E-106 | 236.0452 |
| GINS1        | 1.39174  | 0.892945 | 31.09707 | 2.35E-98  | 8.99E-97  | 212.7251 |
| FRG1B        | 1.073207 | 2.79999  | 15.89201 | 3.02E-42  | 1.91E-41  | 83.39439 |
| ID1          | 2.872054 | 5.249945 | 24.75616 | 4.28E-76  | 6.45E-75  | 161.3777 |
| COX4I2       | 1.354907 | 1.644844 | 22.10736 | 3.31E-66  | 3.67E-65  | 138.5806 |
| BCL2L1       | 2.622794 | 5.542017 | 32.12991 | 8.90E-102 | 4.09E-100 | 220.6184 |
| TPX2         | 3.223398 | 1.733418 | 45.94143 | 2.86E-142 | 2.31E-139 | 314.0696 |
| MYLK2        | -1.28667 | 1.359467 | -14.5357 | 4.81E-37  | 2.73E-36  | 71.43003 |
| FOXS1        | 2.675458 | 1.699659 | 33.01799 | 1.13E-104 | 6.22E-103 | 227.2988 |
| PDRG1        | 1.49419  | 2.924404 | 32.5171  | 4.81E-103 | 2.39E-101 | 223.543  |
| HCK          | 2.591593 | 2.331686 | 28.86054 | 9.50E-91  | 2.51E-89  | 195.1748 |
| TM9SF4       | 1.547912 | 4.287159 | 26.15831 | 3.37E-81  | 6.01E-80  | 173.1466 |
| TSFY26P      | 1.062224 | 1.062862 | 26.18561 | 2.69E-81  | 4.80E-80  | 173.3735 |
| POFUT1       | 1.354248 | 3.278547 | 23.61305 | 7.27E-72  | 9.49E-71  | 151.6242 |
| KIF3B        | 1.021811 | 3.617341 | 18.32246 | 1.15E-51  | 8.88E-51  | 105.0734 |
| NOL4L        | 1.361205 | 2.973789 | 24.283   | 2.37E-74  | 3.37E-73  | 157.3571 |
| COMMD7       | 1.787583 | 4.804683 | 31.15398 | 1.51E-98  | 5.86E-97  | 213.1635 |
| MAPRE1       | 2.103586 | 4.696112 | 31.19618 | 1.10E-98  | 4.26E-97  | 213.4883 |
| BPIFB1       | 2.643039 | 1.318026 | 16.62109 | 4.58E-45  | 3.07E-44  | 89.88086 |
| E2F1         | 2.068717 | 1.406899 | 36.20037 | 1.06E-114 | 1.08E-112 | 250.4398 |
| PXMP4        | 1.161875 | 2.028663 | 27.05758 | 2.03E-84  | 4.05E-83  | 180.5752 |
| CHMP4B       | 2.533326 | 6.128003 | 35.88314 | 1.00E-113 | 9.53E-112 | 248.1882 |
| RALY         | 2.016132 | 5.912506 | 29.98333 | 1.33E-94  | 4.24E-93  | 204.0636 |
| EIF2S2       | 1.347047 | 4.929681 | 22.3747  | 3.22E-67  | 3.68E-66  | 140.9116 |
| ITCH         | 1.259806 | 3.015617 | 21.2095  | 8.60E-63  | 8.72E-62  | 130.7096 |
| DYNLRB1      | 2.55992  | 6.528652 | 36.38217 | 2.94E-115 | 3.10E-113 | 251.7247 |
| MAP1LC3A     | 1.636213 | 4.507472 | 20.40672 | 1.02E-59  | 9.53E-59  | 123.6231 |
| PIGU         | 2.002878 | 3.348068 | 39.61478 | 7.06E-125 | 1.33E-122 | 273.9274 |
| NCOA6        | 1.498667 | 3.169092 | 30.53139 | 1.86E-96  | 6.45E-95  | 208.3453 |
| TP53INP2     | 1.91887  | 2.761942 | 27.30405 | 2.70E-85  | 5.57E-84  | 182.5944 |
| ACSS2        | 1.152788 | 4.146382 | 16.42562 | 2.62E-44  | 1.72E-43  | 88.13934 |
| GSS          | 2.413282 | 3.85886  | 41.01915 | 6.75E-129 | 1.75E-126 | 283.204  |
| EDEM2        | 1.099962 | 4.112995 | 19.99169 | 4.04E-58  | 3.62E-57  | 119.944  |
| PROCR        | 2.602957 | 3.367179 | 32.23844 | 3.92E-102 | 1.84E-100 | 221.4401 |
| MMP24-AS1    | 1.29663  | 5.260239 | 18.60322 | 9.41E-53  | 7.42E-52  | 107.5802 |
| EIF6         | 2.676792 | 6.202224 | 37.37745 | 2.82E-118 | 3.54E-116 | 258.6899 |
| CEP250       | 1.10236  | 2.803696 | 18.59758 | 9.90E-53  | 7.80E-52  | 107.53   |
| ERGIC3       | 1.590009 | 7.11838  | 22.63902 | 3.24E-68  | 3.82E-67  | 143.2101 |
| FER1L4       | 3.153704 | 2.203377 | 23.68689 | 3.86E-72  | 5.09E-71  | 152.2584 |
| CPNE1        | 1.41169  | 6.213658 | 17.36696 | 5.88E-48  | 4.18E-47  | 96.53712 |
| RBM12        | 1.314259 | 3.174177 | 21.62456 | 2.25E-64  | 2.38E-63  | 134.356  |
| ROMO1        | 2.154592 | 6.581912 | 28.31471 | 7.51E-89  | 1.80E-87  | 190.7969 |
| PHF20        | 1.822128 | 3.041969 | 34.89954 | 1.15E-110 | 9.01E-109 | 241.1298 |
| SCAND1       | 1.100106 | 5.184362 | 11.54245 | 5.71E-26  | 2.59E-25  | 45.99927 |
| LINC00657    | 1.874038 | 5.403188 | 27.19769 | 6.44E-85  | 1.31E-83  | 181.7239 |
| EPB41L1      | 2.433216 | 4.344801 | 28.53082 | 1.32E-89  | 3.29E-88  | 192.5347 |
| AAR2         | 1.590115 | 3.700986 | 30.39818 | 5.23E-96  | 1.78E-94  | 207.3081 |

|              |           |           |           |            |            |           |
|--------------|-----------|-----------|-----------|------------|------------|-----------|
| DLGAP4       | 1. 208465 | 4. 856913 | 18. 61152 | 8. 74E-53  | 6. 89E-52  | 107. 6543 |
| MYL9         | 3. 59918  | 6. 532502 | 32. 47156 | 6. 77E-103 | 3. 33E-101 | 223. 2    |
| TGIF2        | 1. 01022  | 3. 012625 | 20. 0927  | 1. 65E-58  | 1. 49E-57  | 120. 8403 |
| JIF2-C20orf2 | 1. 209562 | 0. 747846 | 16. 26762 | 1. 07E-43  | 6. 96E-43  | 86. 73279 |
| C20orf24     | 2. 145063 | 5. 546993 | 31. 62404 | 4. 15E-100 | 1. 75E-98  | 216. 7691 |
| NDRG3        | 1. 416555 | 3. 300708 | 26. 83835 | 1. 23E-83  | 2. 38E-82  | 178. 7731 |
| DSN1         | 1. 42751  | 2. 265007 | 29. 14668 | 9. 75E-92  | 2. 71E-90  | 197. 455  |
| SOGA1        | 1. 198603 | 1. 564687 | 24. 82291 | 2. 43E-76  | 3. 71E-75  | 161. 9429 |
| TLDC2        | 1. 031161 | 1. 824227 | 12. 20599 | 2. 35E-28  | 1. 12E-27  | 51. 4707  |
| RPN2         | 1. 787953 | 6. 572836 | 25. 5909  | 3. 81E-79  | 6. 37E-78  | 168. 4109 |
| MANBAL       | 1. 786102 | 4. 929314 | 27. 63643 | 1. 80E-86  | 3. 91E-85  | 185. 3057 |
| SRC          | 1. 397193 | 4. 999113 | 16. 82055 | 7. 74E-46  | 5. 26E-45  | 91. 65946 |
| BLCAP        | 2. 200968 | 4. 613126 | 33. 60467 | 1. 46E-106 | 8. 89E-105 | 231. 6582 |
| CTNNBL1      | 2. 400399 | 4. 366115 | 40. 43188 | 3. 15E-127 | 7. 04E-125 | 279. 3512 |
| VSTM2L       | 3. 585033 | 2. 587228 | 25. 04377 | 3. 77E-77  | 5. 88E-76  | 163. 8097 |
| RPRD1B       | 1. 005321 | 3. 128757 | 17. 79916 | 1. 24E-49  | 9. 12E-49  | 100. 3983 |
| TGM2         | 3. 851883 | 5. 216253 | 28. 71045 | 3. 15E-90  | 8. 11E-89  | 193. 9746 |
| KIAA1755     | 2. 001871 | 1. 604486 | 29. 04779 | 2. 14E-91  | 5. 83E-90  | 196. 6681 |
| BPI          | 1. 133051 | 0. 665837 | 21. 5307  | 5. 12E-64  | 5. 36E-63  | 133. 5326 |
| SNHG17       | 1. 244242 | 4. 444089 | 15. 02702 | 6. 40E-39  | 3. 78E-38  | 75. 74399 |
| SNHG11       | 1. 048487 | 3. 067443 | 18. 59435 | 1. 02E-52  | 8. 02E-52  | 107. 5011 |
| PPP1R16B     | 1. 03883  | 1. 170708 | 14. 08326 | 2. 51E-35  | 1. 37E-34  | 67. 48242 |
| FAM83D       | 2. 349997 | 1. 297782 | 28. 21728 | 1. 64E-88  | 3. 87E-87  | 190. 0116 |
| DHX35        | 1. 074274 | 2. 226317 | 22. 79595 | 8. 33E-69  | 9. 96E-68  | 144. 5717 |
| MAFB         | 2. 060792 | 3. 159211 | 20. 39116 | 1. 17E-59  | 1. 09E-58  | 123. 4853 |
| TOP1         | 1. 898452 | 4. 118564 | 27. 73097 | 8. 37E-87  | 1. 83E-85  | 186. 0745 |
| PLCG1        | 1. 074374 | 4. 343399 | 13. 77838 | 3. 55E-34  | 1. 90E-33  | 64. 83876 |
| IFT52        | 1. 801321 | 3. 624502 | 33. 66027 | 9. 70E-107 | 5. 97E-105 | 232. 0692 |
| MYBL2        | 1. 119045 | 2. 788445 | 14. 78479 | 5. 40E-38  | 3. 14E-37  | 73. 61359 |
| TOX2         | 1. 343945 | 1. 347275 | 20. 34995 | 1. 69E-59  | 1. 56E-58  | 123. 1204 |
| JPH2         | 1. 059516 | 0. 707212 | 16. 12743 | 3. 72E-43  | 2. 40E-42  | 85. 48587 |
| OSER1        | 1. 45414  | 3. 957136 | 22. 82784 | 6. 32E-69  | 7. 59E-68  | 144. 8482 |
| HNF4A        | 1. 381588 | 3. 231355 | 16. 21825 | 1. 66E-43  | 1. 07E-42  | 86. 29355 |
| SERINC3      | 1. 91069  | 4. 795584 | 28. 7969  | 1. 58E-90  | 4. 12E-89  | 194. 6662 |
| PKIG         | 1. 919772 | 4. 370541 | 26. 14754 | 3. 69E-81  | 6. 56E-80  | 173. 0571 |
| ADA          | 1. 478489 | 2. 551921 | 21. 46949 | 8. 77E-64  | 9. 12E-63  | 132. 9952 |
| YWHAB        | 2. 597641 | 5. 614768 | 37. 86229 | 9. 98E-120 | 1. 37E-117 | 262. 0408 |
| PABPC1L      | -1. 22349 | 4. 648597 | -11. 8237 | 5. 65E-27  | 2. 62E-26  | 48. 30392 |
| TOMM34       | 1. 893966 | 3. 782869 | 31. 72262 | 1. 96E-100 | 8. 36E-99  | 217. 5217 |
| STK4         | 1. 808486 | 2. 460654 | 32. 7529  | 8. 20E-104 | 4. 28E-102 | 225. 315  |
| PI3          | 5. 203969 | 3. 048396 | 34. 79049 | 2. 53E-110 | 1. 93E-108 | 240. 3401 |
| SLPI         | 5. 294038 | 5. 98297  | 37. 01954 | 3. 39E-117 | 3. 97E-115 | 256. 1986 |
| MATN4        | -1. 26828 | 0. 946495 | -30. 2649 | 1. 48E-95  | 4. 91E-94  | 206. 2682 |
| RBPJL        | -7. 18776 | 4. 942881 | -44. 3721 | 4. 02E-138 | 2. 17E-135 | 304. 4974 |
| SDC4         | 2. 798729 | 6. 154112 | 30. 51219 | 2. 15E-96  | 7. 46E-95  | 208. 1959 |
| SYS1         | 1. 491241 | 3. 756896 | 25. 45653 | 1. 17E-78  | 1. 93E-77  | 167. 284  |
| DBNDD2       | 2. 252861 | 5. 024461 | 29. 63889 | 1. 99E-93  | 5. 97E-92  | 201. 3535 |
| PIGT         | 1. 823482 | 5. 464546 | 28. 91534 | 6. 14E-91  | 1. 64E-89  | 195. 6122 |
| WFDC2        | 4. 535883 | 5. 551052 | 30. 99576 | 5. 12E-98  | 1. 93E-96  | 211. 9436 |
| RPS2P7       | -1. 47959 | 1. 502199 | -21. 3545 | 2. 41E-63  | 2. 47E-62  | 131. 9847 |
| WFDC3        | 2. 619837 | 1. 615679 | 23. 81618 | 1. 27E-72  | 1. 71E-71  | 153. 3673 |
| DNTTIP1      | 2. 942347 | 4. 216451 | 40. 1093  | 2. 65E-126 | 5. 52E-124 | 277. 2188 |
| UBE2C        | 4. 482172 | 2. 584686 | 51. 38692 | 6. 98E-156 | 1. 41E-152 | 345. 4912 |
| TNNC2        | 1. 12668  | 1. 375555 | 11. 55037 | 5. 35E-26  | 2. 43E-25  | 46. 06383 |



|           |           |           |           |            |            |           |
|-----------|-----------|-----------|-----------|------------|------------|-----------|
| SNX21     | 1. 412818 | 2. 891665 | 24. 17403 | 6. 00E-74  | 8. 44E-73  | 156. 4278 |
| ACOT8     | 1. 446226 | 3. 829297 | 27. 21427 | 5. 62E-85  | 1. 14E-83  | 181. 8596 |
| ZSWIM3    | 1. 010285 | 1. 132021 | 27. 11135 | 1. 31E-84  | 2. 63E-83  | 181. 0163 |
| ZSWIM1    | 1. 331793 | 2. 044598 | 31. 84873 | 7. 50E-101 | 3. 28E-99  | 218. 4827 |
| CTSA      | 2. 376465 | 6. 105826 | 31. 13246 | 1. 79E-98  | 6. 89E-97  | 212. 9977 |
| PCIF1     | 1. 256496 | 4. 217576 | 22. 57557 | 5. 63E-68  | 6. 57E-67  | 142. 6589 |
| MMP9      | 4. 467332 | 2. 358292 | 41. 00625 | 7. 34E-129 | 1. 90E-126 | 283. 1197 |
| SLC12A5   | 1. 307698 | 1. 433503 | 16. 70412 | 2. 19E-45  | 1. 47E-44  | 90. 62113 |
| CD40      | 1. 184946 | 3. 901577 | 15. 33959 | 4. 05E-40  | 2. 45E-39  | 78. 50142 |
| SLC35C2   | 1. 07175  | 4. 758224 | 18. 46117 | 3. 34E-52  | 2. 60E-51  | 106. 3121 |
| TP53RK    | 1. 693756 | 2. 3376   | 41. 72013 | 7. 21E-131 | 2. 17E-128 | 287. 7537 |
| EYA2      | 1. 82273  | 1. 597216 | 19. 90073 | 9. 06E-58  | 8. 05E-57  | 119. 1364 |
| ZMYND8    | 1. 485727 | 3. 06428  | 23. 66429 | 4. 68E-72  | 6. 15E-71  | 152. 0643 |
| NCOA3     | 1. 274689 | 2. 683392 | 22. 02977 | 6. 51E-66  | 7. 17E-65  | 137. 903  |
| SULF2     | 4. 417767 | 4. 402523 | 46. 93747 | 7. 56E-145 | 7. 04E-142 | 320. 0207 |
| PREX1     | 1. 762495 | 2. 362105 | 22. 23085 | 1. 13E-66  | 1. 27E-65  | 139. 6581 |
| CSE1L     | 1. 57127  | 3. 872131 | 27. 6274  | 1. 94E-86  | 4. 19E-85  | 185. 2322 |
| STAU1     | 1. 684149 | 4. 999953 | 26. 27225 | 1. 31E-81  | 2. 37E-80  | 174. 0932 |
| DDX27     | 1. 417881 | 4. 340318 | 23. 14704 | 4. 00E-70  | 4. 99E-69  | 147. 6099 |
| ZNFX1     | 2. 29959  | 2. 8832   | 39. 43726 | 2. 31E-124 | 4. 23E-122 | 272. 7392 |
| ZFAS1     | 2. 018442 | 6. 820295 | 19. 81994 | 1. 86E-57  | 1. 64E-56  | 118. 4189 |
| PTGIS     | 2. 714855 | 2. 278542 | 23. 69037 | 3. 74E-72  | 4. 94E-71  | 152. 2882 |
| B4GALT5   | 2. 848003 | 3. 577447 | 35. 93061 | 7. 16E-114 | 6. 93E-112 | 248. 5259 |
| SNAI1     | 2. 078061 | 2. 067841 | 24. 91902 | 1. 08E-76  | 1. 66E-75  | 162. 7559 |
| UBE2V1    | 1. 426172 | 5. 631585 | 23. 54852 | 1. 26E-71  | 1. 64E-70  | 151. 0696 |
| TMEM189   | 2. 491471 | 3. 846028 | 39. 77848 | 2. 37E-125 | 4. 67E-123 | 275. 02   |
| CEBPB     | 2. 19617  | 4. 794788 | 24. 93836 | 9. 18E-77  | 1. 41E-75  | 162. 9194 |
| LINC01272 | 2. 627383 | 1. 772191 | 31. 781   | 1. 25E-100 | 5. 42E-99  | 217. 9669 |
| PTPN1     | 1. 879226 | 3. 516809 | 30. 35121 | 7. 53E-96  | 2. 53E-94  | 206. 9418 |
| PARD6B    | 1. 079476 | 1. 619936 | 18. 86596 | 9. 03E-54  | 7. 29E-53  | 109. 9248 |
| BCAS4     | 2. 288335 | 1. 826951 | 32. 10262 | 1. 09E-101 | 5. 00E-100 | 220. 4116 |
| TMSB4XP6  | 1. 244525 | 2. 335674 | 5. 428468 | 1. 13E-07  | 3. 17E-07  | 4. 339585 |
| ADNP      | 1. 354507 | 3. 672238 | 22. 15809 | 2. 13E-66  | 2. 37E-65  | 139. 0234 |
| DPM1      | 1. 064657 | 4. 621672 | 17. 24882 | 1. 69E-47  | 1. 19E-46  | 95. 48206 |
| NFATC2    | 1. 427282 | 1. 594877 | 21. 92642 | 1. 60E-65  | 1. 75E-64  | 136. 9996 |
| ATP9A     | 1. 799427 | 3. 34772  | 25. 64105 | 2. 51E-79  | 4. 20E-78  | 168. 831  |
| ZFP64     | 1. 595614 | 2. 210056 | 35. 79741 | 1. 85E-113 | 1. 72E-111 | 247. 5776 |
| TSHZ2     | 2. 394793 | 2. 226484 | 30. 3823  | 5. 91E-96  | 2. 01E-94  | 207. 1843 |
| ZNF217    | 1. 730166 | 2. 866276 | 23. 2701  | 1. 39E-70  | 1. 75E-69  | 148. 672  |
| BCAS1     | 4. 000169 | 2. 318007 | 34. 03917 | 5. 99E-108 | 3. 96E-106 | 234. 8594 |
| CYP24A1   | 1. 112683 | 0. 544094 | 10. 78598 | 2. 57E-23  | 1. 10E-22  | 39. 91773 |
| PFDN4     | 1. 97747  | 4. 301998 | 30. 45951 | 3. 24E-96  | 1. 12E-94  | 207. 7859 |
| DOK5      | 2. 413293 | 1. 478777 | 31. 11925 | 1. 98E-98  | 7. 60E-97  | 212. 896  |
| FAM210B   | 1. 466154 | 4. 236098 | 23. 98078 | 3. 12E-73  | 4. 27E-72  | 154. 7767 |
| AURKA     | 2. 33504  | 1. 672928 | 37. 59124 | 6. 44E-119 | 8. 49E-117 | 260. 1708 |
| RTFDC1    | 1. 859393 | 5. 268888 | 30. 10385 | 5. 19E-95  | 1. 68E-93  | 205. 0084 |
| BMP7      | 1. 635782 | 1. 106503 | 17. 16616 | 3. 54E-47  | 2. 47E-46  | 94. 74389 |
| RAE1      | 1. 631808 | 3. 389778 | 30. 73715 | 3. 77E-97  | 1. 36E-95  | 209. 943  |
| RBM38     | 1. 590201 | 3. 171296 | 20. 21778 | 5. 45E-59  | 4. 98E-58  | 121. 9493 |
| ZBP1      | 1. 866565 | 1. 089844 | 24. 36028 | 1. 23E-74  | 1. 77E-73  | 158. 0154 |
| PMEP A1   | 3. 463187 | 5. 087954 | 32. 29912 | 2. 48E-102 | 1. 18E-100 | 221. 8988 |
| NKILA     | 1. 995401 | 1. 465472 | 24. 63756 | 1. 17E-75  | 1. 74E-74  | 160. 3721 |
| PPP4R1L   | 1. 136399 | 2. 074898 | 17. 09724 | 6. 54E-47  | 4. 55E-46  | 94. 12859 |
| RAB22A    | 1. 60065  | 2. 372562 | 33. 38572 | 7. 37E-106 | 4. 33E-104 | 230. 0363 |

|                |           |           |           |            |            |           |
|----------------|-----------|-----------|-----------|------------|------------|-----------|
| VAPB           | 1. 21076  | 3. 832427 | 21. 31302 | 3. 46E-63  | 3. 54E-62  | 131. 6203 |
| APCDD1L        | 1. 010858 | 0. 67899  | 12. 51811 | 1. 71E-29  | 8. 33E-29  | 54. 08314 |
| APCDD1L-AS1    | 1. 122012 | 0. 823245 | 10. 89312 | 1. 09E-23  | 4. 73E-23  | 40. 76793 |
| RP5-907D15. 4  | 1. 310589 | 0. 669062 | 18. 77221 | 2. 08E-53  | 1. 66E-52  | 109. 0885 |
| GNAS           | 1. 781183 | 8. 8513   | 19. 72498 | 4. 31E-57  | 3. 78E-56  | 117. 575  |
| NELFCD         | 1. 176492 | 4. 87251  | 18. 05252 | 1. 29E-50  | 9. 65E-50  | 102. 662  |
| CTSZ           | 3. 01693  | 6. 496925 | 37. 62999 | 4. 93E-119 | 6. 56E-117 | 260. 4386 |
| ATP5E          | 2. 703813 | 5. 389136 | 36. 31488 | 4. 73E-115 | 4. 91E-113 | 251. 2496 |
| SLM02          | 2. 192638 | 4. 110132 | 31. 29765 | 5. 03E-99  | 1. 99E-97  | 214. 2684 |
| PHACTR3        | 2. 663028 | 1. 525344 | 21. 52119 | 5. 57E-64  | 5. 82E-63  | 133. 4492 |
| PPP1R3D        | 1. 060284 | 1. 698897 | 24. 13304 | 8. 51E-74  | 1. 19E-72  | 156. 0779 |
| LSM14B         | 1. 113185 | 3. 849083 | 19. 55287 | 1. 99E-56  | 1. 71E-55  | 116. 0445 |
| PSMA7          | 1. 87764  | 6. 659683 | 25. 57727 | 4. 27E-79  | 7. 12E-78  | 168. 2967 |
| MTG2           | 1. 196074 | 4. 029308 | 21. 05695 | 3. 29E-62  | 3. 28E-61  | 129. 3663 |
| ADRM1          | 1. 525785 | 5. 689844 | 21. 75587 | 7. 13E-65  | 7. 64E-64  | 135. 5069 |
| LAMA5          | 1. 13309  | 5. 444095 | 10. 47431 | 3. 02E-22  | 1. 26E-21  | 37. 46706 |
| RPS21          | 1. 319386 | 10. 38095 | 12. 84907 | 1. 04E-30  | 5. 19E-30  | 56. 87737 |
| SLC04A1        | 2. 278126 | 2. 900981 | 20. 00679 | 3. 53E-58  | 3. 17E-57  | 120. 078  |
| RP11-93B14. 9  | 1. 141895 | 1. 134018 | 23. 31679 | 9. 27E-71  | 1. 18E-69  | 149. 0746 |
| SLC04A1-AS1    | 2. 23864  | 1. 382785 | 22. 92092 | 2. 82E-69  | 3. 43E-68  | 145. 6545 |
| NTSR1          | 1. 316442 | 0. 877603 | 11. 54476 | 5. 60E-26  | 2. 54E-25  | 46. 01803 |
| MRGBP          | 1. 657474 | 2. 59674  | 32. 86928 | 3. 43E-104 | 1. 82E-102 | 226. 187  |
| OGFR           | 1. 348886 | 4. 48531  | 18. 25827 | 2. 05E-51  | 1. 56E-50  | 104. 5    |
| TCFL5          | 1. 110769 | 1. 917015 | 24. 60375 | 1. 56E-75  | 2. 30E-74  | 160. 0852 |
| DID01          | 1. 057333 | 3. 785723 | 17. 08126 | 7. 55E-47  | 5. 24E-46  | 93. 98596 |
| GID8           | 1. 299407 | 3. 776187 | 24. 55072 | 2. 44E-75  | 3. 59E-74  | 159. 635  |
| SLC17A9        | 2. 186798 | 2. 83859  | 20. 4417  | 7. 51E-60  | 7. 02E-59  | 123. 9327 |
| YTHDF1         | 1. 504021 | 3. 904497 | 28. 79285 | 1. 63E-90  | 4. 25E-89  | 194. 6339 |
| BIRC7          | 1. 807839 | 0. 891323 | 19. 7889  | 2. 44E-57  | 2. 15E-56  | 118. 1431 |
| NKAIN4         | 1. 415084 | 0. 726287 | 19. 74035 | 3. 76E-57  | 3. 30E-56  | 117. 7116 |
| EEF1A2         | 1. 370085 | 3. 473257 | 9. 732558 | 9. 25E-20  | 3. 67E-19  | 31. 78031 |
| PPDPF          | 2. 491459 | 7. 675872 | 24. 31151 | 1. 86E-74  | 2. 66E-73  | 157. 6    |
| PTK6           | 3. 275042 | 2. 641903 | 32. 98205 | 1. 48E-104 | 8. 05E-103 | 227. 0304 |
| HELZ2          | 2. 148908 | 3. 141344 | 27. 02628 | 2. 62E-84  | 5. 23E-83  | 180. 3183 |
| STMN3          | 1. 744026 | 3. 600159 | 20. 5696  | 2. 42E-60  | 2. 30E-59  | 125. 0642 |
| TNFRSF6B       | 3. 929435 | 3. 035083 | 22. 94129 | 2. 37E-69  | 2. 88E-68  | 145. 8309 |
| ARFRP1         | 1. 841549 | 4. 497172 | 27. 94919 | 1. 43E-87  | 3. 22E-86  | 187. 8448 |
| ZGPAT          | 1. 366594 | 3. 812602 | 22. 49231 | 1. 16E-67  | 1. 34E-66  | 141. 9351 |
| LIME1          | 2. 278737 | 3. 189072 | 17. 37375 | 5. 54E-48  | 3. 93E-47  | 96. 59778 |
| P4-583P15. 1   | 3. 80184  | 2. 319694 | 39. 40544 | 2. 86E-124 | 5. 22E-122 | 272. 5258 |
| SLC2A4RG       | 1. 57517  | 5. 010227 | 20. 70731 | 7. 18E-61  | 6. 92E-60  | 126. 2814 |
| TPD52L2        | 1. 930753 | 5. 16218  | 28. 12324 | 3. 51E-88  | 8. 13E-87  | 189. 2525 |
| SAMD10         | 1. 19778  | 2. 282591 | 18. 78962 | 1. 78E-53  | 1. 43E-52  | 109. 2438 |
| PRPF6          | 1. 680807 | 4. 895039 | 28. 61424 | 6. 79E-90  | 1. 72E-88  | 193. 2038 |
| TCEA2          | 1. 479628 | 4. 352912 | 22. 07343 | 4. 45E-66  | 4. 92E-65  | 138. 2844 |
| RGS19          | 2. 009209 | 2. 903684 | 29. 47821 | 7. 07E-93  | 2. 06E-91  | 200. 0842 |
| CH507-9B2. 3   | 1. 265341 | 4. 862134 | 13. 7693  | 3. 84E-34  | 2. 06E-33  | 64. 76024 |
| CH507-9B2. 5   | 1. 169506 | 2. 606633 | 14. 82888 | 3. 66E-38  | 2. 13E-37  | 74. 00091 |
| CH507-9B2. 9   | 1. 032891 | 2. 190221 | 19. 97662 | 4. 62E-58  | 4. 13E-57  | 119. 8102 |
| H507-42P11. 1  | 1. 233802 | 3. 674699 | 7. 363736 | 1. 55E-12  | 5. 13E-12  | 15. 31416 |
| H507-152C13. 1 | 1. 806534 | 5. 014488 | 26. 28282 | 1. 20E-81  | 2. 17E-80  | 174. 1809 |
| H507-513H4. 1  | 1. 459999 | 1. 221579 | 33. 28264 | 1. 58E-105 | 9. 09E-104 | 229. 2706 |
| H507-513H4. 1  | 1. 708773 | 1. 387187 | 18. 79218 | 1. 74E-53  | 1. 40E-52  | 109. 2666 |
| H507-528H12. 1 | 1. 459999 | 1. 221579 | 33. 28264 | 1. 58E-105 | 9. 09E-104 | 229. 2706 |

|              |           |           |           |            |            |           |
|--------------|-----------|-----------|-----------|------------|------------|-----------|
| RNA5-8S5     | 1. 226897 | 9. 00957  | 7. 070851 | 9. 86E-12  | 3. 19E-11  | 13. 49279 |
| HSPA13       | 1. 084793 | 2. 586408 | 16. 14903 | 3. 07E-43  | 1. 98E-42  | 85. 67794 |
| SAMSN1       | 2. 097206 | 1. 780418 | 24. 42206 | 7. 27E-75  | 1. 05E-73  | 158. 5412 |
| AF127577. 10 | 1. 530721 | 3. 067933 | 18. 17315 | 4. 38E-51  | 3. 32E-50  | 103. 7397 |
| MIR99AHG     | 1. 818546 | 1. 53216  | 25. 95648 | 1. 80E-80  | 3. 14E-79  | 171. 4664 |
| CXADR        | 1. 315886 | 2. 667066 | 18. 19865 | 3. 49E-51  | 2. 65E-50  | 103. 9675 |
| BTG3         | 1. 454506 | 3. 824568 | 20. 994   | 5. 73E-62  | 5. 67E-61  | 128. 8115 |
| C21orf91     | 1. 019468 | 1. 334599 | 21. 70746 | 1. 09E-64  | 1. 16E-63  | 135. 0828 |
| PPIAP22      | 3. 408651 | 5. 802495 | 48. 78408 | 1. 61E-149 | 2. 11E-146 | 330. 8071 |
| JAM2         | 1. 349453 | 2. 047703 | 16. 18509 | 2. 23E-43  | 1. 44E-42  | 85. 99862 |
| ATP5J        | 1. 363187 | 6. 455419 | 20. 50426 | 4. 32E-60  | 4. 06E-59  | 124. 4863 |
| APP          | 2. 235416 | 7. 048195 | 26. 58449 | 9. 91E-83  | 1. 87E-81  | 176. 6791 |
| CYYR1        | 1. 183693 | 2. 118785 | 15. 67171 | 2. 14E-41  | 1. 32E-40  | 81. 44042 |
| CCT8         | 1. 087744 | 5. 924605 | 15. 30171 | 5. 66E-40  | 3. 41E-39  | 78. 16675 |
| MAP3K7CL     | 1. 252078 | 2. 048683 | 22. 11656 | 3. 05E-66  | 3. 39E-65  | 138. 661  |
| BACH1        | 1. 418838 | 2. 829308 | 22. 17157 | 1. 89E-66  | 2. 11E-65  | 139. 141  |
| TIAM1        | 1. 329291 | 1. 245343 | 21. 43168 | 1. 22E-63  | 1. 27E-62  | 132. 6631 |
| SOD1         | 2. 465756 | 6. 57925  | 32. 33634 | 1. 87E-102 | 9. 01E-101 | 222. 18   |
| MIS18A       | 1. 25149  | 1. 988602 | 26. 48209 | 2. 31E-82  | 4. 29E-81  | 175. 8322 |
| URB1-AS1     | 1. 053295 | 2. 286389 | 21. 71154 | 1. 05E-64  | 1. 12E-63  | 135. 1185 |
| EVA1C        | 2. 116493 | 3. 933096 | 27. 26727 | 3. 65E-85  | 7. 48E-84  | 182. 2935 |
| AP000275. 65 | 1. 354257 | 1. 209761 | 16. 96387 | 2. 15E-46  | 1. 48E-45  | 92. 93814 |
| C21orf59     | 1. 242061 | 4. 491779 | 20. 80305 | 3. 08E-61  | 3. 00E-60  | 127. 1269 |
| IFNAR2       | 2. 262906 | 3. 283234 | 34. 29241 | 9. 41E-109 | 6. 60E-107 | 236. 7145 |
| IL10RB-AS1   | 1. 778441 | 1. 84616  | 28. 85431 | 9. 98E-91  | 2. 63E-89  | 195. 125  |
| IL10RB       | 1. 881713 | 4. 261271 | 30. 19239 | 2. 60E-95  | 8. 55E-94  | 205. 7013 |
| IFNAR1       | 1. 471116 | 3. 276808 | 25. 43888 | 1. 36E-78  | 2. 23E-77  | 167. 1359 |
| IFNGR2       | 3. 042498 | 5. 07478  | 40. 75003 | 3. 91E-128 | 9. 39E-126 | 281. 4431 |
| ITSN1        | 1. 941233 | 2. 724078 | 28. 3164  | 7. 41E-89  | 1. 78E-87  | 190. 8105 |
| ATP50        | 1. 438825 | 6. 600093 | 21. 05102 | 3. 47E-62  | 3. 45E-61  | 129. 3141 |
| LINC00649    | 1. 092272 | 0. 93901  | 16. 01952 | 9. 73E-43  | 6. 20E-42  | 84. 52677 |
| MRPS6        | 2. 037493 | 4. 211712 | 31. 55689 | 6. 92E-100 | 2. 87E-98  | 216. 2557 |
| SLC5A3       | 1. 048145 | 1. 230652 | 19. 38541 | 8. 83E-56  | 7. 48E-55  | 114. 5542 |
| RCAN1        | 1. 435175 | 3. 783924 | 16. 65065 | 3. 52E-45  | 2. 37E-44  | 90. 14436 |
| CLIC6        | 1. 476041 | 1. 806352 | 19. 77642 | 2. 73E-57  | 2. 40E-56  | 118. 0321 |
| LINC01426    | 1. 246587 | 0. 862107 | 25. 66909 | 1. 98E-79  | 3. 33E-78  | 169. 0656 |
| RUNX1        | 3. 570699 | 3. 031138 | 45. 43508 | 6. 07E-141 | 4. 17E-138 | 311. 0077 |
| CBR1         | 2. 114692 | 4. 766558 | 28. 35706 | 5. 34E-89  | 1. 29E-87  | 191. 1379 |
| CBR3         | 2. 22479  | 1. 728759 | 41. 6783  | 9. 44E-131 | 2. 80E-128 | 287. 4837 |
| DOPEY2       | 1. 694624 | 1. 869383 | 28. 10867 | 3. 94E-88  | 9. 13E-87  | 189. 1348 |
| AP000695. 6  | 1. 230375 | 0. 613103 | 27. 3879  | 1. 36E-85  | 2. 84E-84  | 183. 2796 |
| AP000695. 4  | 1. 577714 | 0. 818783 | 29. 21364 | 5. 74E-92  | 1. 61E-90  | 197. 9871 |
| SIM2         | 1. 71934  | 1. 007375 | 21. 72087 | 9. 68E-65  | 1. 03E-63  | 135. 2003 |
| DYRK1A       | 1. 046066 | 3. 418287 | 17. 60455 | 7. 04E-49  | 5. 10E-48  | 98. 65965 |
| ERG          | 1. 402401 | 1. 69761  | 19. 02796 | 2. 13E-54  | 1. 75E-53  | 111. 3695 |
| ETS2         | 2. 667336 | 4. 347409 | 28. 80052 | 1. 53E-90  | 4. 01E-89  | 194. 6952 |
| HMGN1        | 1. 507121 | 6. 395857 | 21. 65441 | 1. 73E-64  | 1. 84E-63  | 134. 6178 |
| B3GALT5      | 1. 916653 | 1. 931949 | 21. 8165  | 4. 19E-65  | 4. 52E-64  | 136. 0378 |
| BACE2        | 2. 260826 | 5. 492893 | 21. 57758 | 3. 40E-64  | 3. 57E-63  | 133. 9439 |
| FAM3B        | -1. 03738 | 5. 775115 | -8. 52768 | 6. 19E-16  | 2. 24E-15  | 23. 04665 |
| MX2          | 2. 606765 | 2. 847019 | 28. 27804 | 1. 01E-88  | 2. 40E-87  | 190. 5015 |
| MX1          | 3. 199291 | 3. 94318  | 28. 12664 | 3. 41E-88  | 7. 92E-87  | 189. 28   |
| RIPK4        | 1. 093205 | 3. 045218 | 15. 00152 | 8. 01E-39  | 4. 72E-38  | 75. 51942 |
| ABCG1        | 2. 801717 | 2. 561567 | 37. 65971 | 4. 02E-119 | 5. 36E-117 | 260. 644  |

|             |          |          |          |           |           |          |
|-------------|----------|----------|----------|-----------|-----------|----------|
| TFF3        | 5.301053 | 4.785827 | 26.07967 | 6.48E-81  | 1.14E-79  | 172.4925 |
| TFF2        | 6.080951 | 3.97683  | 27.85652 | 3.03E-87  | 6.75E-86  | 187.0937 |
| TFF1        | 7.657526 | 4.606716 | 30.2147  | 2.18E-95  | 7.21E-94  | 205.8758 |
| TMPRSS3     | 2.999197 | 3.321805 | 33.47656 | 3.76E-106 | 2.25E-104 | 230.71   |
| RSPH1       | 1.495484 | 1.817548 | 23.65267 | 5.17E-72  | 6.78E-71  | 151.9646 |
| SLC37A1     | 2.440576 | 3.02805  | 33.65405 | 1.02E-106 | 6.24E-105 | 232.0232 |
| PDE9A       | 1.727807 | 2.384757 | 21.61772 | 2.39E-64  | 2.52E-63  | 134.2961 |
| PKNOX1      | 1.310401 | 2.161973 | 27.62175 | 2.03E-86  | 4.38E-85  | 185.1862 |
| CBS         | -3.82613 | 4.097767 | -32.4119 | 1.06E-102 | 5.14E-101 | 222.7503 |
| H2BFS       | 1.649416 | 1.776977 | 19.00267 | 2.67E-54  | 2.18E-53  | 111.144  |
| RRP1B       | 1.002635 | 2.643183 | 19.80671 | 2.09E-57  | 1.84E-56  | 118.3013 |
| PDXK        | 1.497947 | 5.571274 | 21.1872  | 1.05E-62  | 1.06E-61  | 130.5134 |
| CSTB        | 3.419514 | 5.386485 | 37.1209  | 1.68E-117 | 2.01E-115 | 256.9056 |
| RRP1        | 1.175233 | 3.479991 | 20.12853 | 1.20E-58  | 1.09E-57  | 121.1581 |
| TRAPPC10    | 1.016161 | 2.898859 | 15.34239 | 3.95E-40  | 2.39E-39  | 78.52616 |
| ICOSLG      | 1.598142 | 1.267159 | 30.17675 | 2.94E-95  | 9.64E-94  | 205.579  |
| PFKL        | 1.467009 | 5.591414 | 17.58936 | 8.06E-49  | 5.83E-48  | 98.52386 |
| TRPM2       | 1.795063 | 1.645609 | 23.95881 | 3.76E-73  | 5.14E-72  | 154.5887 |
| SUMO3       | 2.175462 | 5.003019 | 35.17531 | 1.58E-111 | 1.31E-109 | 243.1206 |
| PTTG1IP     | 2.804686 | 6.26527  | 37.34263 | 3.59E-118 | 4.49E-116 | 258.4481 |
| ITGB2       | 3.757358 | 3.933016 | 33.88479 | 1.86E-107 | 1.19E-105 | 233.7247 |
| ITGB2-AS1   | 1.393581 | 1.191762 | 16.86437 | 5.23E-46  | 3.57E-45  | 92.05035 |
| APO01505.10 | 1.288822 | 1.884747 | 21.75238 | 7.35E-65  | 7.87E-64  | 135.4763 |
| COL18A1     | 1.392867 | 5.931003 | 15.08201 | 3.94E-39  | 2.34E-38  | 76.22838 |
| SLC19A1     | 1.182133 | 2.435831 | 16.05243 | 7.26E-43  | 4.64E-42  | 84.81924 |
| COL6A1      | 2.239774 | 6.268353 | 19.14299 | 7.65E-55  | 6.35E-54  | 112.3948 |
| COL6A2      | 2.991617 | 6.460054 | 25.09549 | 2.44E-77  | 3.83E-76  | 164.246  |
| S100B       | 2.167468 | 2.452267 | 21.52126 | 5.57E-64  | 5.82E-63  | 133.4497 |
| PRMT2       | 1.879822 | 4.891666 | 27.53342 | 4.17E-86  | 8.87E-85  | 184.4668 |
| CECR1       | 2.139178 | 2.971923 | 21.01076 | 4.94E-62  | 4.90E-61  | 128.9592 |
| ATP6V1E1    | 2.149343 | 5.563965 | 33.44661 | 4.70E-106 | 2.79E-104 | 230.4879 |
| BCL2L13     | 1.180162 | 3.805181 | 19.86589 | 1.23E-57  | 1.09E-56  | 118.827  |
| BID         | 2.804153 | 3.626634 | 32.58058 | 2.98E-103 | 1.50E-101 | 224.0208 |
| PEX26       | 1.612965 | 3.111701 | 28.40587 | 3.61E-89  | 8.80E-88  | 191.5306 |
| USP18       | 2.147534 | 2.130581 | 30.36526 | 6.75E-96  | 2.28E-94  | 207.0514 |
| DGCR5       | -1.60876 | 1.395966 | -28.7777 | 1.84E-90  | 4.79E-89  | 194.5129 |
| DGCR2       | 1.279256 | 4.670391 | 20.19803 | 6.49E-59  | 5.92E-58  | 121.7742 |
| DGCR14      | 1.255726 | 2.844888 | 26.05743 | 7.79E-81  | 1.37E-79  | 172.3074 |
| SLC25A1     | 1.293437 | 5.011623 | 18.81378 | 1.44E-53  | 1.15E-52  | 109.4593 |
| MRPL40      | 1.065634 | 4.340755 | 19.37807 | 9.43E-56  | 7.97E-55  | 114.4888 |
| UFD1L       | 1.727671 | 4.912163 | 29.04794 | 2.14E-91  | 5.83E-90  | 196.6693 |
| CDC45       | 2.047391 | 1.244255 | 33.7103  | 6.71E-107 | 4.19E-105 | 232.4386 |
| CLDN5       | 1.482053 | 3.532155 | 12.72202 | 3.05E-30  | 1.51E-29  | 55.80182 |
| GNB1L       | 1.046146 | 1.972211 | 18.5554  | 1.44E-52  | 1.13E-51  | 107.1534 |
| AC000089.3  | 1.330506 | 1.069847 | 34.86619 | 1.46E-110 | 1.13E-108 | 240.8885 |
| COMT        | 2.092002 | 6.095839 | 27.39246 | 1.31E-85  | 2.74E-84  | 183.3168 |
| RANBP1      | 1.761327 | 5.393056 | 28.09969 | 4.24E-88  | 9.80E-87  | 189.0622 |
| RTN4R       | 1.271052 | 1.749752 | 17.05294 | 9.72E-47  | 6.74E-46  | 93.73315 |
| DGCR6L      | 1.306282 | 4.64752  | 22.57487 | 5.66E-68  | 6.60E-67  | 142.6528 |
| USP41       | 1.388055 | 1.614773 | 11.36615 | 2.41E-25  | 1.08E-24  | 44.5661  |
| SCARF2      | 2.204556 | 2.562334 | 24.4421  | 6.13E-75  | 8.90E-74  | 158.7117 |
| MED15       | 1.67062  | 4.777716 | 23.02436 | 1.15E-69  | 1.42E-68  | 146.5496 |
| TMEM191A    | 2.134871 | 2.095626 | 32.26369 | 3.24E-102 | 1.53E-100 | 221.631  |
| PI4KA       | 1.093033 | 4.180707 | 18.11089 | 7.64E-51  | 5.76E-50  | 103.1835 |

|             |           |           |           |            |            |           |
|-------------|-----------|-----------|-----------|------------|------------|-----------|
| SNAP29      | 1. 505868 | 3. 444791 | 27. 39766 | 1. 26E-85  | 2. 64E-84  | 183. 3593 |
| CRKL        | 1. 34366  | 3. 379221 | 24. 17276 | 6. 06E-74  | 8. 53E-73  | 156. 4169 |
| bac-B135H6. | 1. 080287 | 1. 153702 | 19. 90133 | 9. 01E-58  | 8. 00E-57  | 119. 1418 |
| SLC7A4      | 1. 57674  | 0. 86714  | 22. 40212 | 2. 54E-67  | 2. 91E-66  | 141. 1503 |
| UBE2L3      | 1. 963447 | 4. 438293 | 36. 22313 | 9. 04E-115 | 9. 25E-113 | 250. 6008 |
| MAPK1       | 1. 356605 | 3. 823383 | 17. 33385 | 7. 91E-48  | 5. 60E-47  | 96. 24145 |
| IGLV4-69    | 2. 879184 | 1. 732585 | 19. 49162 | 3. 43E-56  | 2. 94E-55  | 115. 4995 |
| IGLV8-61    | 2. 577994 | 1. 662565 | 15. 17452 | 1. 74E-39  | 1. 04E-38  | 77. 04405 |
| IGLV4-60    | 1. 341385 | 0. 937841 | 7. 604539 | 3. 27E-13  | 1. 10E-12  | 16. 85073 |
| IGLV6-57    | 3. 013345 | 1. 72801  | 20. 57952 | 2. 22E-60  | 2. 11E-59  | 125. 1519 |
| IGLV10-54   | 2. 006054 | 1. 214386 | 13. 63916 | 1. 18E-33  | 6. 29E-33  | 63. 63632 |
| IGLV1-51    | 3. 896031 | 3. 075088 | 22. 09046 | 3. 83E-66  | 4. 25E-65  | 138. 4331 |
| IGLV9-49    | 1. 436365 | 0. 795501 | 13. 09684 | 1. 25E-31  | 6. 40E-31  | 58. 98425 |
| IGLV1-47    | 3. 960275 | 2. 526142 | 23. 51448 | 1. 69E-71  | 2. 19E-70  | 150. 7769 |
| IGLV7-46    | 2. 89409  | 1. 845537 | 18. 27925 | 1. 70E-51  | 1. 30E-50  | 104. 6874 |
| IGLV5-45    | 1. 83555  | 1. 088836 | 13. 98395 | 5. 95E-35  | 3. 24E-34  | 66. 61981 |
| IGLV1-44    | 4. 182196 | 2. 705539 | 23. 81088 | 1. 33E-72  | 1. 79E-71  | 153. 3219 |
| IGLV7-43    | 2. 49783  | 1. 517973 | 17. 15317 | 3. 97E-47  | 2. 77E-46  | 94. 62792 |
| IGLV1-40    | 4. 675643 | 3. 246896 | 24. 8317  | 2. 26E-76  | 3. 44E-75  | 162. 0173 |
| IGLV1-36    | 1. 63199  | 0. 890977 | 13. 0413  | 2. 02E-31  | 1. 02E-30  | 58. 51091 |
| IGLV3-27    | 1. 56516  | 0. 831071 | 12. 31433 | 9. 49E-29  | 4. 56E-28  | 52. 3749  |
| IGLV3-25    | 4. 065284 | 2. 525246 | 22. 74249 | 1. 32E-68  | 1. 58E-67  | 144. 1082 |
| IGLV2-23    | 4. 539785 | 2. 86335  | 26. 79289 | 1. 78E-83  | 3. 44E-82  | 178. 3987 |
| IGLV3-21    | 3. 802658 | 2. 148164 | 22. 04592 | 5. 65E-66  | 6. 23E-65  | 138. 0441 |
| IGLV3-19    | 4. 172202 | 2. 665939 | 23. 16721 | 3. 37E-70  | 4. 21E-69  | 147. 7841 |
| IGLV2-18    | 1. 927051 | 1. 096756 | 14. 79293 | 5. 03E-38  | 2. 92E-37  | 73. 68514 |
| IGLL5       | 4. 241654 | 2. 830164 | 25. 75704 | 9. 51E-80  | 1. 62E-78  | 169. 8013 |
| IGLV2-14    | 4. 586079 | 3. 759596 | 23. 53854 | 1. 38E-71  | 1. 78E-70  | 150. 9838 |
| IGLV2-11    | 4. 132604 | 2. 942427 | 23. 22651 | 2. 02E-70  | 2. 54E-69  | 148. 296  |
| IGLV3-10    | 2. 886618 | 1. 822676 | 17. 41277 | 3. 91E-48  | 2. 78E-47  | 96. 94636 |
| IGLV3-9     | 1. 870687 | 1. 018525 | 13. 96136 | 7. 25E-35  | 3. 94E-34  | 66. 42378 |
| IGLV2-8     | 3. 613863 | 2. 561472 | 20. 99614 | 5. 62E-62  | 5. 56E-61  | 128. 8303 |
| IGLV3-1     | 4. 426046 | 2. 683943 | 25. 59289 | 3. 75E-79  | 6. 27E-78  | 168. 4276 |
| IGLC1       | 5. 839054 | 5. 245432 | 28. 85269 | 1. 01E-90  | 2. 66E-89  | 195. 1121 |
| IGLC2       | 5. 997513 | 6. 299709 | 27. 85358 | 3. 10E-87  | 6. 90E-86  | 187. 0698 |
| IGLC3       | 5. 829695 | 5. 436992 | 28. 00352 | 9. 22E-88  | 2. 10E-86  | 188. 2846 |
| IGLC7       | 2. 738054 | 1. 529507 | 16. 85368 | 5. 76E-46  | 3. 93E-45  | 91. 95497 |
| GNAZ        | 1. 086523 | 1. 166965 | 15. 40053 | 2. 36E-40  | 1. 43E-39  | 79. 04004 |
| RAB36       | 1. 199639 | 1. 544619 | 21. 05799 | 3. 26E-62  | 3. 25E-61  | 129. 3755 |
| BCR         | 2. 243926 | 4. 228261 | 35. 27213 | 7. 86E-112 | 6. 64E-110 | 243. 8173 |
| GUSBP11     | -1. 08151 | 3. 226459 | -13. 8579 | 1. 78E-34  | 9. 61E-34  | 65. 52717 |
| VPREB3      | 1. 479709 | 0. 943663 | 11. 45319 | 1. 19E-25  | 5. 34E-25  | 45. 2725  |
| CHCHD10     | 1. 579609 | 6. 182963 | 19. 91049 | 8. 31E-58  | 7. 39E-57  | 119. 2231 |
| MMP11       | 7. 425619 | 4. 291908 | 53. 53509 | 6. 05E-161 | 1. 93E-157 | 357. 1771 |
| AP000349. 2 | 6. 061169 | 3. 011679 | 45. 40825 | 7. 14E-141 | 4. 85E-138 | 310. 8447 |
| SMARCB1     | 1. 627059 | 4. 909292 | 26. 12254 | 4. 54E-81  | 8. 05E-80  | 172. 8492 |
| MIF         | 1. 747128 | 7. 627041 | 15. 36297 | 3. 29E-40  | 1. 99E-39  | 78. 70804 |
| SUSD2       | 2. 092206 | 2. 381346 | 21. 19738 | 9. 57E-63  | 9. 68E-62  | 130. 603  |
| GGT5        | 2. 816098 | 4. 568602 | 29. 68529 | 1. 38E-93  | 4. 17E-92  | 201. 7195 |
| ADORA2A     | 1. 159866 | 1. 456011 | 17. 27046 | 1. 39E-47  | 9. 82E-47  | 95. 67533 |
| GUCD1       | 1. 566353 | 5. 009173 | 24. 41369 | 7. 80E-75  | 1. 13E-73  | 158. 47   |
| SNRPD3      | 2. 357142 | 5. 52969  | 37. 39341 | 2. 53E-118 | 3. 19E-116 | 258. 8006 |
| GGT1        | 1. 065143 | 4. 955377 | 9. 193985 | 5. 14E-18  | 1. 96E-17  | 27. 79345 |
| BCRP3       | 1. 025328 | 1. 582879 | 14. 80079 | 4. 69E-38  | 2. 73E-37  | 73. 75412 |

|              |           |           |           |            |            |           |
|--------------|-----------|-----------|-----------|------------|------------|-----------|
| KIAA1671     | 1. 513849 | 2. 866923 | 24. 69708 | 7. 05E-76  | 1. 05E-74  | 160. 877  |
| ASPHD2       | 2. 4665   | 1. 465916 | 33. 66563 | 9. 32E-107 | 5. 75E-105 | 232. 1088 |
| SRRD         | 1. 129537 | 3. 041169 | 21. 39972 | 1. 62E-63  | 1. 67E-62  | 132. 3824 |
| TFIP11       | 1. 400504 | 3. 856638 | 26. 28054 | 1. 22E-81  | 2. 21E-80  | 174. 162  |
| TPST2        | -2. 46817 | 5. 72826  | -25. 1964 | 1. 04E-77  | 1. 66E-76  | 165. 097  |
| P5-1172A22.  | 1. 184409 | 0. 641276 | 25. 51847 | 6. 99E-79  | 1. 15E-77  | 167. 8037 |
| MN1          | 1. 653504 | 1. 188897 | 27. 06891 | 1. 85E-84  | 3. 70E-83  | 180. 6682 |
| PITPNB       | 1. 427986 | 4. 209132 | 24. 28026 | 2. 43E-74  | 3. 45E-73  | 157. 3337 |
| CHEK2        | 1. 670212 | 2. 059547 | 31. 57923 | 5. 84E-100 | 2. 43E-98  | 216. 4265 |
| XBP1         | -1. 63191 | 7. 915752 | -15. 2878 | 6. 40E-40  | 3. 85E-39  | 78. 04402 |
| KREMEN1      | 1. 338237 | 1. 904546 | 21. 75365 | 7. 27E-65  | 7. 79E-64  | 135. 4874 |
| GAS2L1       | 1. 151012 | 3. 190609 | 16. 59678 | 5. 69E-45  | 3. 80E-44  | 89. 6642  |
| AP1B1        | 1. 371567 | 4. 580464 | 22. 85058 | 5. 19E-69  | 6. 25E-68  | 145. 0453 |
| NIPSNAP1     | 1. 523766 | 4. 038056 | 26. 27592 | 1. 27E-81  | 2. 30E-80  | 174. 1236 |
| ZMAT5        | 1. 185237 | 3. 658441 | 22. 31192 | 5. 56E-67  | 6. 32E-66  | 140. 3648 |
| UQCR10       | 2. 015283 | 5. 693881 | 31. 94068 | 3. 73E-101 | 1. 65E-99  | 219. 1822 |
| ASCC2        | 1. 169622 | 4. 623357 | 19. 67695 | 6. 61E-57  | 5. 76E-56  | 117. 148  |
| LIF          | 3. 359872 | 2. 567332 | 31. 25035 | 7. 23E-99  | 2. 84E-97  | 213. 905  |
| OSM          | 1. 664331 | 1. 08635  | 20. 36944 | 1. 42E-59  | 1. 32E-58  | 123. 293  |
| GATSL3       | 1. 076838 | 2. 421765 | 16. 44553 | 2. 19E-44  | 1. 45E-43  | 88. 31667 |
| TBC1D10A     | 1. 877258 | 3. 497209 | 29. 95262 | 1. 69E-94  | 5. 37E-93  | 203. 8226 |
| SF3A1        | 1. 089494 | 4. 654769 | 13. 07489 | 1. 51E-31  | 7. 71E-31  | 58. 79707 |
| SEC14L2      | 3. 066254 | 2. 826944 | 38. 76519 | 2. 12E-122 | 3. 49E-120 | 268. 2085 |
| RP4-539M6. 1 | 1. 51044  | 1. 02024  | 20. 69387 | 8. 08E-61  | 7. 78E-60  | 126. 1626 |
| MTFP1        | 1. 543455 | 3. 611949 | 20. 38629 | 1. 23E-59  | 1. 14E-58  | 123. 4422 |
| GAL3ST1      | 1. 228107 | 2. 365057 | 14. 16534 | 1. 23E-35  | 6. 76E-35  | 68. 19648 |
| PES1         | 1. 341494 | 5. 023688 | 20. 80351 | 3. 07E-61  | 2. 99E-60  | 127. 131  |
| TCN2         | 2. 227817 | 3. 496825 | 31. 91387 | 4. 57E-101 | 2. 01E-99  | 218. 9784 |
| SLC35E4      | 1. 614769 | 1. 385766 | 29. 94486 | 1. 80E-94  | 5. 68E-93  | 203. 7617 |
| DUSP18       | 1. 515573 | 1. 733815 | 29. 44972 | 8. 86E-93  | 2. 56E-91  | 199. 8588 |
| CTA-963H5. 5 | 1. 439169 | 1. 609957 | 22. 45337 | 1. 63E-67  | 1. 88E-66  | 141. 5963 |
| MORC2        | 1. 326081 | 3. 836259 | 21. 85419 | 3. 02E-65  | 3. 27E-64  | 136. 3677 |
| TUG1_1       | 1. 076365 | 2. 26601  | 6. 294274 | 1. 03E-09  | 3. 11E-09  | 8. 930832 |
| SELM         | 1. 103224 | 6. 262407 | 12. 02972 | 1. 02E-27  | 4. 82E-27  | 50. 0059  |
| INPP5J       | -1. 29735 | 2. 141141 | -21. 6017 | 2. 75E-64  | 2. 90E-63  | 134. 1552 |
| RNF185-AS1   | 1. 160393 | 1. 410809 | 11. 38479 | 2. 07E-25  | 9. 26E-25  | 44. 71714 |
| LIMK2        | 1. 194148 | 4. 154717 | 15. 95089 | 1. 79E-42  | 1. 14E-41  | 83. 91722 |
| PIK3IP1      | 2. 773129 | 3. 670665 | 33. 33376 | 1. 08E-105 | 6. 30E-104 | 229. 6505 |
| DRG1         | 1. 188753 | 4. 756895 | 18. 77014 | 2. 12E-53  | 1. 70E-52  | 109. 07   |
| PRR14L       | 1. 017655 | 2. 317855 | 22. 11868 | 3. 00E-66  | 3. 33E-65  | 138. 6795 |
| DEPDC5       | 1. 056907 | 2. 134613 | 21. 96766 | 1. 12E-65  | 1. 22E-64  | 137. 3602 |
| YWHAH        | 2. 363236 | 5. 851692 | 29. 64057 | 1. 97E-93  | 5. 90E-92  | 201. 3668 |
| SLC5A1       | 2. 905276 | 2. 0135   | 27. 64009 | 1. 75E-86  | 3. 80E-85  | 185. 3355 |
| RTCB         | 1. 384424 | 4. 90686  | 21. 83101 | 3. 69E-65  | 3. 99E-64  | 136. 1649 |
| FBX07        | 1. 514456 | 5. 051956 | 24. 04407 | 1. 82E-73  | 2. 51E-72  | 155. 3178 |
| TIMP3        | 2. 381067 | 5. 921867 | 20. 39897 | 1. 10E-59  | 1. 02E-58  | 123. 5544 |
| LARGE        | 1. 002099 | 2. 315919 | 19. 38349 | 8. 98E-56  | 7. 60E-55  | 114. 537  |
| HMGXB4       | 1. 179393 | 2. 381002 | 21. 68408 | 1. 34E-64  | 1. 42E-63  | 134. 8778 |
| TOM1         | 2. 01336  | 4. 418206 | 30. 82947 | 1. 85E-97  | 6. 77E-96  | 210. 6582 |
| HMOX1        | 2. 956071 | 2. 995756 | 31. 66993 | 2. 92E-100 | 1. 24E-98  | 217. 1196 |
| MCM5         | 2. 000427 | 3. 602245 | 31. 29089 | 5. 30E-99  | 2. 09E-97  | 214. 2165 |
| RASD2        | 1. 089783 | 1. 226867 | 17. 00453 | 1. 50E-46  | 1. 04E-45  | 93. 30109 |
| APOL6        | 2. 26596  | 1. 970433 | 35. 92249 | 7. 59E-114 | 7. 31E-112 | 248. 4681 |
| RBFOX2       | 1. 410924 | 3. 727537 | 20. 13077 | 1. 18E-58  | 1. 07E-57  | 121. 1779 |

|          |           |           |           |            |            |           |
|----------|-----------|-----------|-----------|------------|------------|-----------|
| APOL3    | 1. 928569 | 3. 204303 | 24. 15321 | 7. 16E-74  | 1. 00E-72  | 156. 2501 |
| APOL4    | 1. 789068 | 1. 506724 | 23. 92376 | 5. 08E-73  | 6. 89E-72  | 154. 2887 |
| APOL2    | 2. 580479 | 4. 039506 | 32. 86827 | 3. 46E-104 | 1. 84E-102 | 226. 1795 |
| APOL1    | 5. 173401 | 4. 440358 | 50. 87162 | 1. 21E-154 | 2. 22E-151 | 342. 6308 |
| MYH9     | 1. 935293 | 6. 892258 | 20. 80952 | 2. 91E-61  | 2. 83E-60  | 127. 1841 |
| TXN2     | 1. 392231 | 5. 28317  | 23. 75644 | 2. 13E-72  | 2. 83E-71  | 152. 8551 |
| IFT27    | 1. 119822 | 3. 878081 | 20. 50629 | 4. 24E-60  | 3. 99E-59  | 124. 5043 |
| NCF4     | 2. 149829 | 2. 350352 | 25. 31096 | 3. 98E-78  | 6. 44E-77  | 166. 0608 |
| CSF2RB   | 1. 782256 | 1. 421098 | 21. 83025 | 3. 72E-65  | 4. 02E-64  | 136. 1582 |
| TST      | 1. 676213 | 5. 356104 | 18. 42209 | 4. 74E-52  | 3. 68E-51  | 105. 9631 |
| KCTD17   | 2. 397365 | 2. 753123 | 35. 55845 | 1. 01E-112 | 8. 96E-111 | 245. 8711 |
| IL2RB    | 1. 673272 | 1. 089818 | 24. 876   | 1. 55E-76  | 2. 38E-75  | 162. 3921 |
| C1QTNF6  | 2. 414714 | 2. 791428 | 30. 17762 | 2. 92E-95  | 9. 58E-94  | 205. 5858 |
| RAC2     | 4. 172292 | 3. 588319 | 48. 37914 | 1. 65E-148 | 2. 08E-145 | 328. 4686 |
| CYTH4    | 1. 669902 | 1. 895892 | 21. 43923 | 1. 14E-63  | 1. 19E-62  | 132. 7295 |
| MFNG     | 2. 088358 | 2. 494559 | 27. 76218 | 6. 50E-87  | 1. 43E-85  | 186. 328  |
| CARD10   | 1. 716969 | 3. 638875 | 22. 92839 | 2. 65E-69  | 3. 21E-68  | 145. 7191 |
| SH3BP1   | 2. 370782 | 2. 502353 | 34. 26685 | 1. 13E-108 | 7. 91E-107 | 236. 5276 |
| LGALS1   | 4. 240727 | 7. 694332 | 36. 64292 | 4. 71E-116 | 5. 23E-114 | 253. 5608 |
| NOL12    | 1. 162441 | 3. 484046 | 21. 09246 | 2. 41E-62  | 2. 41E-61  | 129. 6792 |
| TRIOBP   | 1. 608619 | 4. 453994 | 22. 05363 | 5. 28E-66  | 5. 83E-65  | 138. 1115 |
| H1FO     | 1. 79562  | 6. 278413 | 19. 99405 | 3. 96E-58  | 3. 54E-57  | 119. 965  |
| GCAT     | -1. 46775 | 4. 024755 | -19. 2179 | 3. 92E-55  | 3. 28E-54  | 113. 062  |
| POLR2F   | 1. 677069 | 5. 225764 | 27. 23921 | 4. 59E-85  | 9. 38E-84  | 182. 0639 |
| BAIAP2L2 | 3. 318937 | 2. 552062 | 28. 582   | 8. 79E-90  | 2. 21E-88  | 192. 9453 |
| MAFF     | 2. 889045 | 3. 49498  | 30. 32214 | 9. 45E-96  | 3. 16E-94  | 206. 715  |
| TMEM184B | 1. 945578 | 4. 175213 | 27. 40679 | 1. 17E-85  | 2. 45E-84  | 183. 4339 |
| KDELR3   | 2. 464495 | 3. 759162 | 33. 68302 | 8. 20E-107 | 5. 08E-105 | 232. 2372 |
| CBY1     | 1. 074463 | 4. 371302 | 19. 08618 | 1. 27E-54  | 1. 05E-53  | 111. 8885 |
| TOMM22   | 1. 701957 | 4. 560231 | 30. 32573 | 9. 19E-96  | 3. 08E-94  | 206. 743  |
| JOSD1    | 1. 653898 | 4. 115093 | 26. 40675 | 4. 30E-82  | 7. 93E-81  | 175. 2084 |
| DNAL4    | 1. 27929  | 3. 793718 | 22. 24122 | 1. 03E-66  | 1. 16E-65  | 139. 7485 |
| APOBEC3B | 1. 543118 | 1. 770428 | 20. 6953  | 7. 98E-61  | 7. 68E-60  | 126. 1753 |
| APOBEC3C | 2. 768416 | 2. 824894 | 42. 79251 | 7. 70E-134 | 3. 13E-131 | 294. 6125 |
| APOBEC3D | 1. 679168 | 1. 193938 | 32. 43503 | 8. 91E-103 | 4. 34E-101 | 222. 9247 |
| APOBEC3F | 1. 636615 | 1. 675794 | 35. 49695 | 1. 57E-112 | 1. 37E-110 | 245. 4308 |
| APOBEC3G | 2. 452737 | 2. 19327  | 34. 3669  | 5. 47E-109 | 3. 89E-107 | 237. 2586 |
| PDGFB    | 2. 138676 | 2. 804984 | 27. 13147 | 1. 11E-84  | 2. 23E-83  | 181. 1813 |
| MGAT3    | 2. 066614 | 2. 072025 | 23. 25081 | 1. 64E-70  | 2. 06E-69  | 148. 5056 |
| MKL1     | 1. 6111   | 3. 700004 | 25. 1131  | 2. 10E-77  | 3. 31E-76  | 164. 3946 |
| SLC25A17 | 1. 223531 | 3. 164791 | 24. 25306 | 3. 06E-74  | 4. 34E-73  | 157. 1019 |
| ST13     | 1. 117251 | 6. 63908  | 14. 013   | 4. 63E-35  | 2. 52E-34  | 66. 87201 |
| RBX1     | 2. 233727 | 4. 542078 | 37. 14382 | 1. 43E-117 | 1. 72E-115 | 257. 0654 |
| L3MBTL2  | 1. 26578  | 3. 166514 | 24. 73835 | 4. 97E-76  | 7. 48E-75  | 161. 2268 |
| RANGAP1  | 1. 205059 | 5. 022901 | 16. 03803 | 8. 25E-43  | 5. 27E-42  | 84. 69127 |
| TOB2     | 1. 388101 | 3. 765863 | 20. 16946 | 8. 36E-59  | 7. 61E-58  | 121. 521  |
| PHF5A    | 1. 455178 | 4. 097609 | 26. 1528  | 3. 53E-81  | 6. 29E-80  | 173. 1008 |
| ACO2     | 1. 308203 | 4. 996674 | 22. 04768 | 5. 57E-66  | 6. 14E-65  | 138. 0595 |
| POLR3H   | 1. 395832 | 3. 317579 | 26. 91017 | 6. 79E-84  | 1. 33E-82  | 179. 364  |
| CSDC2    | -2. 28293 | 2. 72602  | -17. 9811 | 2. 43E-50  | 1. 82E-49  | 102. 024  |
| DESI1    | 1. 126134 | 3. 383078 | 21. 03496 | 3. 99E-62  | 3. 97E-61  | 129. 1725 |
| XRCC6    | 1. 885264 | 6. 334258 | 27. 27343 | 3. 47E-85  | 7. 12E-84  | 182. 3439 |
| NHP2L1   | 1. 735393 | 5. 965655 | 21. 15766 | 1. 36E-62  | 1. 37E-61  | 130. 2533 |
| C22orf46 | 1. 244756 | 2. 005847 | 23. 82808 | 1. 15E-72  | 1. 55E-71  | 153. 4693 |

|               |           |           |           |            |            |           |
|---------------|-----------|-----------|-----------|------------|------------|-----------|
| MEI1          | 2. 417394 | 1. 632953 | 32. 85899 | 3. 71E-104 | 1. 96E-102 | 226. 11   |
| SREBF2        | 1. 026309 | 4. 768576 | 13. 41451 | 8. 22E-33  | 4. 30E-32  | 61. 70295 |
| CENPM         | 2. 88126  | 1. 834065 | 32. 27661 | 2. 94E-102 | 1. 40E-100 | 221. 7287 |
| NAGA          | 2. 505465 | 3. 342459 | 42. 25932 | 2. 28E-132 | 8. 01E-130 | 291. 2175 |
| FAM109B       | 1. 061846 | 3. 399878 | 17. 82054 | 1. 02E-49  | 7. 54E-49  | 100. 5894 |
| NDUFA6        | 1. 642641 | 5. 024985 | 26. 53996 | 1. 43E-82  | 2. 68E-81  | 176. 311  |
| TCF20         | 1. 59594  | 2. 745598 | 28. 74771 | 2. 34E-90  | 6. 05E-89  | 194. 2728 |
| NFAM1         | 1. 461376 | 1. 119269 | 23. 59227 | 8. 69E-72  | 1. 13E-70  | 151. 4457 |
| RRP7A         | 1. 874311 | 3. 698101 | 30. 18453 | 2. 76E-95  | 9. 08E-94  | 205. 6399 |
| POLDIP3       | 1. 180844 | 4. 356222 | 19. 19667 | 4. 74E-55  | 3. 95E-54  | 112. 8732 |
| CYB5R3        | 2. 339398 | 6. 172894 | 29. 77072 | 7. 06E-94  | 2. 17E-92  | 202. 3926 |
| A4GALT        | 2. 359976 | 2. 911687 | 25. 27167 | 5. 54E-78  | 8. 91E-77  | 165. 7303 |
| TTLL1         | 1. 518621 | 2. 014686 | 33. 28562 | 1. 55E-105 | 8. 91E-104 | 229. 2928 |
| BIK           | 3. 750201 | 2. 696306 | 43. 06314 | 1. 40E-134 | 6. 03E-132 | 296. 3243 |
| MCAT          | 1. 116343 | 3. 293323 | 20. 47573 | 5. 56E-60  | 5. 22E-59  | 124. 2338 |
| TSPO          | 3. 10265  | 6. 587159 | 32. 65505 | 1. 71E-103 | 8. 73E-102 | 224. 5805 |
| TTLL12        | 1. 854051 | 4. 195492 | 24. 04475 | 1. 81E-73  | 2. 49E-72  | 155. 3237 |
| SAMM50        | 1. 154318 | 4. 313211 | 19. 4827  | 3. 72E-56  | 3. 18E-55  | 115. 4202 |
| PARVB         | 1. 853791 | 3. 42232  | 22. 60481 | 4. 37E-68  | 5. 11E-67  | 142. 9129 |
| PARVG         | 1. 971967 | 2. 654147 | 19. 04271 | 1. 87E-54  | 1. 53E-53  | 111. 501  |
| LDOC1L        | 1. 215577 | 2. 485891 | 20. 51631 | 3. 88E-60  | 3. 66E-59  | 124. 5929 |
| PRR5          | 1. 171777 | 3. 164833 | 18. 56106 | 1. 37E-52  | 1. 08E-51  | 107. 2039 |
| ARHGAP8       | 1. 020811 | 3. 418896 | 11. 98664 | 1. 46E-27  | 6. 87E-27  | 49. 64908 |
| NUP50-AS1     | 1. 073048 | 2. 438341 | 18. 6473  | 6. 35E-53  | 5. 02E-52  | 107. 9738 |
| NUP50         | 1. 042809 | 3. 264831 | 18. 95562 | 4. 06E-54  | 3. 31E-53  | 110. 7245 |
| KIAA0930      | 2. 285735 | 4. 13889  | 31. 43772 | 1. 72E-99  | 6. 97E-98  | 215. 3432 |
| FBLN1         | 2. 248869 | 5. 863834 | 17. 69308 | 3. 19E-49  | 2. 33E-48  | 99. 45054 |
| ATXN10        | 1. 394263 | 5. 225177 | 21. 45203 | 1. 02E-63  | 1. 06E-62  | 132. 8419 |
| WNT7B         | 2. 587128 | 1. 492689 | 30. 35946 | 7. 07E-96  | 2. 38E-94  | 207. 0062 |
| PRR34-AS1     | 1. 135895 | 3. 338662 | 16. 23563 | 1. 42E-43  | 9. 22E-43  | 86. 44825 |
| GTSE1         | 1. 709398 | 1. 020522 | 34. 32377 | 7. 49E-109 | 5. 28E-107 | 236. 9436 |
| CELSR1        | 2. 947844 | 2. 047174 | 40. 37682 | 4. 53E-127 | 9. 89E-125 | 278. 9881 |
| GRAMD4        | 1. 119549 | 3. 466459 | 16. 52715 | 1. 06E-44  | 7. 03E-44  | 89. 04374 |
| CTA-29F11. 1  | 1. 000478 | 2. 327601 | 14. 57785 | 3. 33E-37  | 1. 90E-36  | 71. 79873 |
| TBC1D22A      | 1. 294273 | 3. 597469 | 22. 52224 | 8. 94E-68  | 1. 04E-66  | 142. 1954 |
| FAM19A5       | 2. 272596 | 2. 051277 | 30. 5917  | 1. 16E-96  | 4. 09E-95  | 208. 8141 |
| PIM3          | 1. 119246 | 5. 157948 | 11. 4808  | 9. 46E-26  | 4. 27E-25  | 45. 49705 |
| MAPK12        | 1. 105336 | 1. 951142 | 15. 30515 | 5. 49E-40  | 3. 31E-39  | 78. 19717 |
| MAPK11        | 1. 071318 | 2. 208765 | 15. 19157 | 1. 50E-39  | 8. 95E-39  | 77. 19447 |
| PLXNB2        | 1. 761271 | 6. 076014 | 20. 71782 | 6. 54E-61  | 6. 31E-60  | 126. 3743 |
| SCO2          | 2. 064005 | 3. 951587 | 29. 13209 | 1. 10E-91  | 3. 03E-90  | 197. 339  |
| TYMP          | 3. 01621  | 4. 70623  | 25. 92847 | 2. 28E-80  | 3. 95E-79  | 171. 2328 |
| ODF3B         | 2. 052804 | 3. 96072  | 19. 45315 | 4. 83E-56  | 4. 12E-55  | 115. 1572 |
| CTA-384D8. 3E | 1. 961818 | 1. 067801 | 26. 32064 | 8. 78E-82  | 1. 60E-80  | 174. 4947 |
| CTA-384D8. 3G | 1. 088172 | 0. 618386 | 18. 54817 | 1. 54E-52  | 1. 21E-51  | 107. 0888 |
| KLHDC7B       | 1. 732677 | 0. 930504 | 15. 83146 | 5. 17E-42  | 3. 25E-41  | 82. 85706 |
| RPL23AP82     | 1. 752827 | 3. 465069 | 28. 55614 | 1. 08E-89  | 2. 70E-88  | 192. 7379 |
| CSF2RA        | 2. 552916 | 1. 897376 | 30. 92126 | 9. 09E-98  | 3. 38E-96  | 211. 3682 |
| IL3RA         | 1. 718507 | 2. 144745 | 25. 98091 | 1. 47E-80  | 2. 57E-79  | 171. 67   |
| P2RY8         | 1. 198398 | 1. 054346 | 16. 58029 | 6. 60E-45  | 4. 40E-44  | 89. 51724 |
| ZBED1         | 1. 394347 | 3. 850355 | 23. 3503  | 6. 95E-71  | 8. 84E-70  | 149. 3634 |
| CD99P1        | 1. 06938  | 2. 138151 | 19. 07319 | 1. 42E-54  | 1. 17E-53  | 111. 7727 |
| CD99          | 1. 737909 | 7. 231722 | 20. 05956 | 2. 21E-58  | 1. 99E-57  | 120. 5462 |
| MXRA5         | 3. 560727 | 3. 309774 | 31. 37254 | 2. 83E-99  | 1. 13E-97  | 214. 8434 |



|              |           |           |           |            |            |           |
|--------------|-----------|-----------|-----------|------------|------------|-----------|
| PRKX         | 1. 327674 | 2. 183064 | 21. 76216 | 6. 75E-65  | 7. 24E-64  | 135. 5619 |
| HDHD1        | 1. 817404 | 2. 660895 | 28. 6508  | 5. 07E-90  | 1. 30E-88  | 193. 4969 |
| STS          | 2. 031108 | 1. 860086 | 31. 16883 | 1. 35E-98  | 5. 23E-97  | 213. 2778 |
| ANOS1        | 1. 785321 | 0. 977778 | 27. 23632 | 4. 70E-85  | 9. 60E-84  | 182. 0402 |
| TBL1X        | 1. 210393 | 2. 313801 | 22. 41331 | 2. 30E-67  | 2. 65E-66  | 141. 2478 |
| GPR143       | 1. 332964 | 1. 251959 | 17. 92992 | 3. 85E-50  | 2. 86E-49  | 101. 5667 |
| WWC3         | 1. 376994 | 2. 633504 | 25. 23294 | 7. 67E-78  | 1. 23E-76  | 165. 4044 |
| CLCN4        | 1. 237188 | 1. 001836 | 25. 4884  | 9. 00E-79  | 1. 48E-77  | 167. 5514 |
| MID1         | 1. 202959 | 1. 91594  | 17. 712   | 2. 70E-49  | 1. 97E-48  | 99. 61962 |
| HCCS         | 2. 013221 | 3. 121535 | 38. 0866  | 2. 14E-120 | 3. 07E-118 | 263. 5818 |
| ARHGAP6      | 1. 068973 | 1. 318998 | 16. 09847 | 4. 82E-43  | 3. 09E-42  | 85. 22847 |
| MSL3         | 1. 052604 | 3. 470362 | 17. 34749 | 7. 00E-48  | 4. 96E-47  | 96. 36325 |
| TMSB4X       | 3. 160643 | 10. 76813 | 30. 35876 | 7. 10E-96  | 2. 39E-94  | 207. 0007 |
| EGFL6        | 1. 445338 | 0. 723854 | 23. 24545 | 1. 71E-70  | 2. 16E-69  | 148. 4594 |
| RAB9A        | 1. 265771 | 3. 905993 | 22. 65328 | 2. 87E-68  | 3. 38E-67  | 143. 334  |
| PIR          | 1. 666309 | 2. 122094 | 24. 206   | 4. 57E-74  | 6. 44E-73  | 156. 7005 |
| BMX          | 1. 106862 | 0. 879942 | 15. 91536 | 2. 45E-42  | 1. 55E-41  | 83. 6017  |
| ACE2         | 1. 035251 | 1. 546378 | 10. 05067 | 8. 15E-21  | 3. 31E-20  | 34. 19279 |
| CA5BP1       | 1. 469772 | 2. 790136 | 23. 11052 | 5. 49E-70  | 6. 81E-69  | 147. 2944 |
| AC112497. 1  | 1. 272898 | 1. 346229 | 25. 03699 | 3. 99E-77  | 6. 21E-76  | 163. 7524 |
| ZRSR2        | 1. 141251 | 3. 176873 | 19. 44131 | 5. 37E-56  | 4. 58E-55  | 115. 0518 |
| AP1S2        | 1. 525775 | 2. 770074 | 21. 25835 | 5. 60E-63  | 5. 70E-62  | 131. 1395 |
| GRPR         | -1. 48558 | 1. 052891 | -25. 5503 | 5. 36E-79  | 8. 89E-78  | 168. 0708 |
| SYAP1        | 1. 817864 | 2. 965339 | 36. 701   | 3. 14E-116 | 3. 51E-114 | 253. 9687 |
| RBBP7        | 1. 428302 | 5. 656402 | 22. 75811 | 1. 16E-68  | 1. 38E-67  | 144. 2436 |
| NHS          | 1. 49529  | 0. 988923 | 27. 6304  | 1. 89E-86  | 4. 09E-85  | 185. 2566 |
| SH3KBP1      | 3. 513713 | 2. 941206 | 52. 9042  | 1. 78E-159 | 5. 14E-156 | 353. 7843 |
| EIF1AX       | 1. 220301 | 4. 400238 | 16. 97273 | 1. 99E-46  | 1. 37E-45  | 93. 01725 |
| RPS6KA3      | 1. 725253 | 3. 183323 | 24. 71695 | 5. 96E-76  | 8. 95E-75  | 161. 0454 |
| MBTPS2       | 1. 198535 | 2. 110338 | 23. 04435 | 9. 72E-70  | 1. 19E-68  | 146. 7225 |
| SMS          | 2. 727887 | 4. 57377  | 43. 54918 | 6. 62E-136 | 3. 08E-133 | 299. 3796 |
| FAM3C2       | 2. 523923 | 3. 606587 | 22. 21291 | 1. 32E-66  | 1. 48E-65  | 139. 5017 |
| ACOT9        | 1. 64973  | 4. 077824 | 27. 59995 | 2. 43E-86  | 5. 21E-85  | 185. 0088 |
| SAT1         | 2. 239201 | 7. 895806 | 19. 42211 | 6. 37E-56  | 5. 42E-55  | 114. 8809 |
| APOO         | 1. 434281 | 3. 152617 | 29. 63346 | 2. 08E-93  | 6. 22E-92  | 201. 3106 |
| PDK3         | 1. 455653 | 1. 768821 | 28. 83275 | 1. 19E-90  | 3. 11E-89  | 194. 9528 |
| GS1-358P8. 4 | 1. 051783 | 2. 030975 | 20. 40222 | 1. 06E-59  | 9. 91E-59  | 123. 5832 |
| CXorf21      | 1. 066172 | 0. 689688 | 19. 74235 | 3. 70E-57  | 3. 24E-56  | 117. 7294 |
| GK           | 1. 717851 | 1. 887395 | 27. 70862 | 1. 00E-86  | 2. 19E-85  | 185. 8928 |
| DMD          | -1. 38051 | 2. 860974 | -19. 1311 | 8. 50E-55  | 7. 05E-54  | 112. 2888 |
| TBCAP1       | 1. 00473  | 0. 606912 | 21. 55865 | 4. 01E-64  | 4. 21E-63  | 133. 7779 |
| TMEM47       | 1. 843257 | 2. 481731 | 22. 34954 | 4. 01E-67  | 4. 58E-66  | 140. 6925 |
| PRRG1        | 1. 904336 | 1. 610108 | 33. 08267 | 7. 00E-105 | 3. 88E-103 | 227. 7815 |
| CYBB         | 2. 487865 | 2. 362006 | 24. 08827 | 1. 25E-73  | 1. 73E-72  | 155. 6955 |
| DYNLT3       | 2. 322892 | 3. 519831 | 33. 06863 | 7. 77E-105 | 4. 30E-103 | 227. 6768 |
| ATP6AP2      | 2. 661427 | 5. 040521 | 38. 82159 | 1. 45E-122 | 2. 42E-120 | 268. 5908 |
| CXorf38      | 1. 598724 | 2. 444335 | 30. 42754 | 4. 16E-96  | 1. 43E-94  | 207. 5369 |
| MED14        | 1. 042912 | 3. 19375  | 17. 98127 | 2. 43E-50  | 1. 82E-49  | 102. 0255 |
| RPS2P55      | 1. 614674 | 1. 494146 | 37. 47234 | 1. 46E-118 | 1. 90E-116 | 259. 3478 |
| USP9X        | 1. 215742 | 3. 513471 | 19. 92414 | 7. 36E-58  | 6. 55E-57  | 119. 3443 |
| DDX3X        | 1. 442404 | 5. 188761 | 18. 51925 | 1. 99E-52  | 1. 56E-51  | 106. 8306 |
| CASK         | 2. 047562 | 3. 347264 | 31. 41747 | 2. 01E-99  | 8. 12E-98  | 215. 188  |
| P11-204C16.  | 1. 223628 | 0. 649956 | 24. 32536 | 1. 65E-74  | 2. 36E-73  | 157. 718  |
| GPR34        | 1. 302108 | 1. 481884 | 14. 80392 | 4. 56E-38  | 2. 65E-37  | 73. 78161 |

|             |          |          |          |           |           |          |
|-------------|----------|----------|----------|-----------|-----------|----------|
| MAOB        | 2.668338 | 3.210818 | 31.80775 | 1.02E-100 | 4.44E-99  | 218.1707 |
| FUNDC1      | 1.945516 | 3.064363 | 34.88775 | 1.25E-110 | 9.76E-109 | 241.0445 |
| CXorf36     | 1.289028 | 1.835701 | 18.75477 | 2.43E-53  | 1.94E-52  | 108.9328 |
| MIR222HG    | 1.767558 | 1.647302 | 21.71491 | 1.02E-64  | 1.09E-63  | 135.148  |
| SLC9A7      | 1.164098 | 1.856723 | 19.52043 | 2.66E-56  | 2.28E-55  | 115.7559 |
| RP2         | 1.97236  | 1.840857 | 35.5667  | 9.55E-113 | 8.47E-111 | 245.9301 |
| RGN         | -1.48556 | 3.159027 | -16.9143 | 3.35E-46  | 2.30E-45  | 92.4958  |
| NDUFB11     | 1.155392 | 5.850459 | 17.9243  | 4.04E-50  | 3.00E-49  | 101.5165 |
| UBA1        | 1.848996 | 5.920803 | 27.02227 | 2.71E-84  | 5.40E-83  | 180.2853 |
| CDK16       | 1.068089 | 5.126918 | 16.57859 | 6.70E-45  | 4.46E-44  | 89.50212 |
| USP11       | 1.393361 | 4.409951 | 21.08916 | 2.48E-62  | 2.48E-61  | 129.6501 |
| TIMP1       | 4.709907 | 7.929984 | 36.51409 | 1.16E-115 | 1.27E-113 | 252.6546 |
| CFP         | 1.483211 | 1.361341 | 17.46241 | 2.51E-48  | 1.79E-47  | 97.3898  |
| ELK1        | 1.869805 | 3.374493 | 32.74162 | 8.92E-104 | 4.64E-102 | 225.2304 |
| UXT         | 1.080013 | 6.591147 | 16.27873 | 9.69E-44  | 6.30E-43  | 86.83171 |
| SLC38A5     | -1.62014 | 6.144571 | -11.8137 | 6.13E-27  | 2.84E-26  | 48.22179 |
| FTSJ1       | 1.397099 | 4.486802 | 23.05098 | 9.18E-70  | 1.13E-68  | 146.7798 |
| PORCN       | 1.364468 | 2.784342 | 22.4805  | 1.28E-67  | 1.49E-66  | 141.8324 |
| EBP         | 2.170901 | 5.14084  | 28.96178 | 4.24E-91  | 1.14E-89  | 195.9826 |
| TBC1D25     | 1.145501 | 2.441265 | 23.21322 | 2.26E-70  | 2.84E-69  | 148.1812 |
| RBM3        | 1.046973 | 7.083897 | 11.6097  | 3.29E-26  | 1.50E-25  | 46.54828 |
| P11-1148L6. | 1.459714 | 3.060936 | 23.38735 | 5.05E-71  | 6.45E-70  | 149.6826 |
| WAS         | 2.141809 | 2.16138  | 23.36459 | 6.15E-71  | 7.82E-70  | 149.4866 |
| SUV39H1     | 1.086877 | 1.630226 | 27.5772  | 2.92E-86  | 6.25E-85  | 184.8235 |
| TIMM17B     | 1.882666 | 4.805929 | 31.2464  | 7.45E-99  | 2.92E-97  | 213.8746 |
| PQBP1       | 1.032365 | 5.637562 | 15.59504 | 4.21E-41  | 2.59E-40  | 80.76123 |
| SLC35A2     | 1.753614 | 4.050808 | 29.35341 | 1.90E-92  | 5.41E-91  | 199.0961 |
| PIM2        | 2.358117 | 2.628309 | 30.8796  | 1.25E-97  | 4.62E-96  | 211.0461 |
| OTUD5       | 1.138753 | 4.610262 | 19.46288 | 4.43E-56  | 3.79E-55  | 115.2438 |
| TFE3        | 1.552601 | 3.89688  | 24.32604 | 1.64E-74  | 2.35E-73  | 157.7238 |
| PRAF2       | 2.402345 | 3.407216 | 34.20247 | 1.81E-108 | 1.24E-106 | 236.0565 |
| GPKOW       | 1.828962 | 3.324938 | 38.07678 | 2.29E-120 | 3.27E-118 | 263.5144 |
| PRICKLE3    | 1.096904 | 2.522279 | 19.51964 | 2.68E-56  | 2.30E-55  | 115.7489 |
| CCDC22      | 1.075617 | 3.178171 | 22.53116 | 8.27E-68  | 9.62E-67  | 142.2729 |
| FOXP3       | 1.486104 | 0.801349 | 25.32192 | 3.63E-78  | 5.88E-77  | 166.153  |
| PPP1R3F     | 1.000998 | 1.509301 | 18.70075 | 3.94E-53  | 3.13E-52  | 108.4507 |
| GSPT2       | 1.491352 | 2.142023 | 21.60168 | 2.75E-64  | 2.90E-63  | 134.1554 |
| MAGED1      | 1.89271  | 5.59907  | 28.4488  | 2.56E-89  | 6.27E-88  | 191.8758 |
| MAGED4B     | 1.010207 | 3.242876 | 10.29014 | 1.28E-21  | 5.27E-21  | 36.03534 |
| MAGED4      | 1.936803 | 1.755293 | 20.24494 | 4.28E-59  | 3.92E-58  | 122.19   |
| TSPYL2      | -1.1194  | 4.624626 | -12.3591 | 6.52E-29  | 3.14E-28  | 52.74934 |
| IQSEC2      | 1.242921 | 2.723003 | 23.97203 | 3.36E-73  | 4.60E-72  | 154.7018 |
| SMC1A       | 1.168618 | 3.171662 | 15.95726 | 1.69E-42  | 1.07E-41  | 83.97376 |
| HSD17B10    | 1.542903 | 5.509676 | 24.17821 | 5.79E-74  | 8.14E-73  | 156.4635 |
| TSR2        | 1.63948  | 4.338599 | 30.279   | 1.32E-95  | 4.40E-94  | 206.3782 |
| GNL3L       | 1.126663 | 1.833377 | 20.34052 | 1.84E-59  | 1.70E-58  | 123.0368 |
| MAGED2      | 2.007072 | 5.742357 | 28.43921 | 2.76E-89  | 6.77E-88  | 191.7987 |
| APEX2       | 1.913635 | 2.841102 | 40.40961 | 3.65E-127 | 8.03E-125 | 279.2043 |
| FAM104B     | 1.401255 | 2.923252 | 30.76971 | 2.93E-97  | 1.06E-95  | 210.1954 |
| RRAGB       | 1.006914 | 3.077623 | 18.21668 | 2.97E-51  | 2.26E-50  | 104.1285 |
| UBQLN2      | 1.938675 | 2.977912 | 34.26579 | 1.14E-108 | 7.96E-107 | 236.5199 |
| LINC01420   | 2.639729 | 3.867772 | 44.56152 | 1.25E-138 | 6.95E-136 | 305.6658 |
| SPIN4       | 1.131472 | 1.253163 | 20.41147 | 9.81E-60  | 9.14E-59  | 123.6651 |
| ARHGEF9     | 1.455854 | 2.545964 | 28.69299 | 3.62E-90  | 9.31E-89  | 193.8349 |

|           |           |           |           |            |            |           |
|-----------|-----------|-----------|-----------|------------|------------|-----------|
| ZC4H2     | 1. 244421 | 1. 97687  | 24. 02974 | 2. 05E-73  | 2. 83E-72  | 155. 1953 |
| LAS1L     | 1. 026392 | 3. 796033 | 21. 03124 | 4. 13E-62  | 4. 10E-61  | 129. 1397 |
| MSN       | 3. 251938 | 5. 282205 | 34. 54175 | 1. 53E-109 | 1. 13E-107 | 238. 5333 |
| VSIG4     | 2. 032529 | 3. 344634 | 15. 27198 | 7. 36E-40  | 4. 43E-39  | 77. 90425 |
| HEPH      | 3. 408684 | 2. 310044 | 38. 02016 | 3. 38E-120 | 4. 78E-118 | 263. 1259 |
| YIPF6     | 1. 422393 | 3. 342093 | 24. 29165 | 2. 20E-74  | 3. 14E-73  | 157. 4308 |
| EFNB1     | 3. 564271 | 3. 610892 | 41. 07625 | 4. 65E-129 | 1. 22E-126 | 283. 5766 |
| PJA1      | 2. 087085 | 3. 333285 | 36. 04069 | 3. 28E-114 | 3. 27E-112 | 249. 3079 |
| PDZD11    | 2. 256116 | 4. 284963 | 40. 38968 | 4. 16E-127 | 9. 12E-125 | 279. 0729 |
| KIF4A     | 1. 829913 | 0. 950394 | 37. 75431 | 2. 10E-119 | 2. 82E-117 | 261. 2968 |
| GDPD2     | 1. 015023 | 0. 510045 | 16. 16269 | 2. 72E-43  | 1. 75E-42  | 85. 79941 |
| TEX11     | -1. 60444 | 1. 495555 | -20. 3278 | 2. 06E-59  | 1. 90E-58  | 122. 9244 |
| SNX12     | 2. 059369 | 4. 073679 | 36. 50818 | 1. 21E-115 | 1. 32E-113 | 252. 613  |
| IL2RG     | 5. 127664 | 3. 339341 | 52. 78144 | 3. 46E-159 | 9. 10E-156 | 353. 1204 |
| OGT       | -1. 19542 | 5. 497858 | -14. 4878 | 7. 33E-37  | 4. 15E-36  | 71. 01017 |
| CXCR3     | 1. 713866 | 0. 970317 | 27. 80105 | 4. 74E-87  | 1. 05E-85  | 186. 6436 |
| PIN4      | 1. 561081 | 3. 415212 | 29. 52753 | 4. 79E-93  | 1. 41E-91  | 200. 4741 |
| HDAC8     | 1. 222572 | 2. 930416 | 26. 75249 | 2. 48E-83  | 4. 78E-82  | 178. 0657 |
| JPX       | 1. 440898 | 3. 575666 | 23. 4281  | 3. 56E-71  | 4. 56E-70  | 150. 0336 |
| SLC16A2   | 1. 311938 | 2. 272582 | 20. 08516 | 1. 76E-58  | 1. 59E-57  | 120. 7734 |
| RLIM      | 1. 4645   | 2. 321868 | 28. 68615 | 3. 82E-90  | 9. 81E-89  | 193. 7801 |
| ABCB7     | 1. 013282 | 2. 837879 | 20. 83344 | 2. 36E-61  | 2. 30E-60  | 127. 3952 |
| UPRT      | 1. 019738 | 2. 33493  | 23. 59619 | 8. 40E-72  | 1. 10E-70  | 151. 4793 |
| PBDC1     | 1. 924616 | 3. 881014 | 35. 15618 | 1. 81E-111 | 1. 49E-109 | 242. 9828 |
| MAGT1     | 1. 293531 | 4. 18539  | 21. 42012 | 1. 35E-63  | 1. 40E-62  | 132. 5616 |
| COX7B     | 2. 459678 | 5. 659024 | 37. 42023 | 2. 10E-118 | 2. 66E-116 | 258. 9866 |
| PGK1      | 2. 833927 | 6. 800846 | 31. 93787 | 3. 81E-101 | 1. 68E-99  | 219. 1609 |
| TAF9B     | 1. 012281 | 2. 629897 | 18. 50101 | 2. 34E-52  | 1. 83E-51  | 106. 6678 |
| P2RY10    | 1. 003763 | 0. 573451 | 14. 47286 | 8. 35E-37  | 4. 72E-36  | 70. 87982 |
| ITM2A     | 1. 511516 | 2. 871466 | 13. 83542 | 2. 16E-34  | 1. 17E-33  | 65. 33228 |
| SH3BGRL   | 2. 153356 | 5. 207694 | 30. 09555 | 5. 54E-95  | 1. 79E-93  | 204. 9434 |
| POF1B     | 2. 389954 | 2. 474148 | 28. 16424 | 2. 52E-88  | 5. 89E-87  | 189. 5836 |
| CHM       | 1. 2504   | 2. 257542 | 26. 09753 | 5. 58E-81  | 9. 88E-80  | 172. 6412 |
| NAP1L3    | 1. 242278 | 1. 068015 | 15. 7768  | 8. 40E-42  | 5. 25E-41  | 82. 37213 |
| DIAPH2    | 1. 454264 | 1. 872318 | 29. 83864 | 4. 14E-94  | 1. 29E-92  | 202. 927  |
| TSPAN6    | 1. 379837 | 3. 67085  | 23. 84512 | 9. 95E-73  | 1. 34E-71  | 153. 6153 |
| SRPX2     | 2. 941938 | 2. 583118 | 32. 97507 | 1. 56E-104 | 8. 47E-103 | 226. 9782 |
| 11-524D16 | 1. 522443 | 1. 298837 | 21. 17901 | 1. 12E-62  | 1. 14E-61  | 130. 4413 |
| SYTL4     | 1. 181309 | 3. 270006 | 17. 01894 | 1. 32E-46  | 9. 11E-46  | 93. 42966 |
| CSTF2     | 1. 833641 | 2. 307276 | 40. 41021 | 3. 63E-127 | 8. 02E-125 | 279. 2083 |
| TRMT2B    | 1. 053292 | 2. 317752 | 22. 74343 | 1. 31E-68  | 1. 56E-67  | 144. 1163 |
| CENPI     | 1. 008015 | 0. 568218 | 28. 69451 | 3. 57E-90  | 9. 20E-89  | 193. 847  |
| TIMM8A    | 1. 229439 | 1. 709573 | 32. 21805 | 4. 57E-102 | 2. 14E-100 | 221. 2858 |
| BTK       | 1. 730529 | 1. 646666 | 19. 86729 | 1. 22E-57  | 1. 08E-56  | 118. 8394 |
| RPL36A    | 1. 08167  | 10. 07331 | 10. 68897 | 5. 56E-23  | 2. 36E-22  | 39. 15129 |
| GLA       | 2. 034957 | 3. 524109 | 34. 18869 | 2. 01E-108 | 1. 37E-106 | 235. 9557 |
| HNRNPH2   | 1. 601385 | 4. 775833 | 25. 09735 | 2. 40E-77  | 3. 77E-76  | 164. 2618 |
| ARMCX6    | 1. 115088 | 4. 685389 | 18. 74999 | 2. 54E-53  | 2. 03E-52  | 108. 8902 |
| BEX1      | -1. 01741 | 3. 988536 | -6. 73388 | 7. 76E-11  | 2. 44E-10  | 11. 46431 |
| NXF3      | 1. 423485 | 1. 201492 | 11. 08647 | 2. 32E-24  | 1. 02E-23  | 42. 31181 |
| BEX4      | 1. 062278 | 3. 89525  | 13. 31287 | 1. 97E-32  | 1. 02E-31  | 60. 83103 |
| TCEAL8    | 1. 698369 | 4. 769867 | 27. 77778 | 5. 73E-87  | 1. 26E-85  | 186. 4546 |
| TCEAL7    | 1. 87975  | 1. 439589 | 27. 62764 | 1. 94E-86  | 4. 18E-85  | 185. 2342 |
| WBP5      | 2. 062385 | 5. 126032 | 27. 66505 | 1. 43E-86  | 3. 10E-85  | 185. 5386 |

|               |           |           |           |            |            |           |
|---------------|-----------|-----------|-----------|------------|------------|-----------|
| NGFRAP1       | 1. 602889 | 5. 939001 | 22. 1821  | 1. 72E-66  | 1. 93E-65  | 139. 233  |
| TCEAL4        | 1. 372692 | 5. 788214 | 18. 79663 | 1. 68E-53  | 1. 34E-52  | 109. 3063 |
| TCEAL3        | 1. 118342 | 4. 332698 | 12. 32553 | 8. 64E-29  | 4. 16E-28  | 52. 46853 |
| MORF4L2       | 1. 231721 | 6. 585789 | 15. 49909 | 9. 86E-41  | 6. 03E-40  | 79. 91182 |
| TMSB15B       | 1. 479675 | 1. 415138 | 26. 28278 | 1. 20E-81  | 2. 17E-80  | 174. 1805 |
| MUM1L1        | -1. 03249 | 1. 783386 | -11. 727  | 1. 25E-26  | 5. 76E-26  | 47. 50924 |
| RNF128        | 2. 226482 | 3. 608888 | 24. 84863 | 1. 96E-76  | 2. 99E-75  | 162. 1605 |
| CLDN2         | 3. 398431 | 3. 520619 | 19. 07838 | 1. 36E-54  | 1. 12E-53  | 111. 8189 |
| PRPS1         | 1. 309205 | 3. 603104 | 19. 1298  | 8. 60E-55  | 7. 13E-54  | 112. 2773 |
| TSC22D3       | 1. 996871 | 6. 166124 | 16. 17901 | 2. 35E-43  | 1. 52E-42  | 85. 94459 |
| VSIG1         | 3. 443773 | 1. 806389 | 21. 71115 | 1. 05E-64  | 1. 12E-63  | 135. 1151 |
| PSMD10        | 1. 93794  | 3. 889659 | 34. 41896 | 3. 74E-109 | 2. 68E-107 | 237. 6385 |
| RP6-149D17. 1 | -3. 16291 | 2. 829623 | -11. 4331 | 1. 40E-25  | 6. 28E-25  | 45. 10907 |
| COL4A5        | 1. 289428 | 1. 364993 | 18. 66355 | 5. 49E-53  | 4. 35E-52  | 108. 1188 |
| NXT2          | 1. 330988 | 1. 856146 | 28. 23067 | 1. 48E-88  | 3. 48E-87  | 190. 1196 |
| ACSL4         | 2. 322265 | 2. 977719 | 32. 65609 | 1. 69E-103 | 8. 67E-102 | 224. 5883 |
| AMMECR1       | 1. 331279 | 1. 613943 | 32. 30228 | 2. 42E-102 | 1. 16E-100 | 221. 9227 |
| PAK3          | -2. 06145 | 2. 127651 | -29. 4014 | 1. 30E-92  | 3. 73E-91  | 199. 4763 |
| CAPN6         | 1. 241214 | 1. 837771 | 13. 05637 | 1. 77E-31  | 9. 01E-31  | 58. 63927 |
| EIF4BP7       | 1. 081642 | 1. 397735 | 26. 65961 | 5. 34E-83  | 1. 02E-81  | 177. 2995 |
| AMOT          | 1. 405878 | 1. 386472 | 22. 3315  | 4. 69E-67  | 5. 34E-66  | 140. 5354 |
| PLS3          | 2. 798231 | 4. 67212  | 36. 23695 | 8. 20E-115 | 8. 42E-113 | 250. 6986 |
| RP1-241P17. 4 | 2. 078248 | 1. 759307 | 15. 84089 | 4. 76E-42  | 2. 99E-41  | 82. 9407  |
| SLC6A14       | 3. 628852 | 1. 773801 | 31. 10371 | 2. 23E-98  | 8. 55E-97  | 212. 7763 |
| WDR44         | 1. 350295 | 2. 087685 | 24. 40726 | 8. 24E-75  | 1. 19E-73  | 158. 4153 |
| DOCK11        | 2. 399833 | 1. 887517 | 35. 88591 | 9. 84E-114 | 9. 39E-112 | 248. 2079 |
| IL13RA1       | 2. 404177 | 4. 17815  | 35. 98011 | 5. 04E-114 | 4. 94E-112 | 248. 8777 |
| PGRMC1        | 2. 223773 | 4. 949196 | 33. 64879 | 1. 06E-106 | 6. 48E-105 | 231. 9844 |
| SLC25A43      | 1. 48946  | 2. 5466   | 28. 02611 | 7. 68E-88  | 1. 75E-86  | 188. 4673 |
| CXorf56       | 1. 315289 | 3. 017957 | 24. 64135 | 1. 13E-75  | 1. 68E-74  | 160. 4043 |
| UBE2A         | 1. 936267 | 4. 486877 | 33. 0277  | 1. 05E-104 | 5. 81E-103 | 227. 3713 |
| NKRF          | 1. 149938 | 1. 963524 | 26. 47348 | 2. 48E-82  | 4. 60E-81  | 175. 761  |
| 6-Sep         | 2. 685947 | 2. 834686 | 35. 43287 | 2. 49E-112 | 2. 15E-110 | 244. 9716 |
| RPL39         | 1. 41608  | 10. 7486  | 13. 62218 | 1. 37E-33  | 7. 27E-33  | 63. 48996 |
| UPF3B         | 1. 005347 | 2. 50105  | 20. 00954 | 3. 45E-58  | 3. 10E-57  | 120. 1024 |
| NDUFA1        | 1. 95752  | 6. 050976 | 31. 02798 | 3. 99E-98  | 1. 52E-96  | 212. 1923 |
| NKAP          | 1. 116186 | 2. 207936 | 30. 17501 | 2. 98E-95  | 9. 77E-94  | 205. 5654 |
| RHOXF1P1      | -2. 01417 | 1. 362727 | -37. 2632 | 6. 23E-118 | 7. 70E-116 | 257. 8962 |
| ZBTB33        | 1. 168382 | 2. 162267 | 24. 1524  | 7. 21E-74  | 1. 01E-72  | 156. 2432 |
| LAMP2         | 1. 819611 | 5. 24244  | 26. 04775 | 8. 45E-81  | 1. 48E-79  | 172. 2268 |
| CUL4B         | 1. 13591  | 3. 546691 | 20. 19029 | 6. 95E-59  | 6. 34E-58  | 121. 7057 |
| MCTS1         | 1. 296439 | 4. 733908 | 23. 54634 | 1. 29E-71  | 1. 67E-70  | 151. 0509 |
| C1GALT1C1     | 1. 839458 | 3. 594147 | 33. 78796 | 3. 79E-107 | 2. 39E-105 | 233. 0115 |
| XIAP          | 1. 459622 | 3. 103144 | 29. 9339  | 1. 96E-94  | 6. 17E-93  | 203. 6756 |
| STAG2         | 1. 484037 | 3. 479978 | 23. 87414 | 7. 76E-73  | 1. 05E-71  | 153. 8639 |
| SH2D1A        | 1. 016189 | 0. 576503 | 15. 99792 | 1. 18E-42  | 7. 50E-42  | 84. 33495 |
| SMARCA1       | 1. 336359 | 3. 207623 | 17. 52214 | 1. 47E-48  | 1. 06E-47  | 97. 92336 |
| SASH3         | 2. 144847 | 2. 001602 | 21. 6483  | 1. 83E-64  | 1. 94E-63  | 134. 5642 |
| ZDHHC9        | 1. 378144 | 3. 816553 | 20. 96249 | 7. 56E-62  | 7. 46E-61  | 128. 5337 |
| BCORL1        | 1. 068851 | 1. 843674 | 20. 53268 | 3. 36E-60  | 3. 17E-59  | 124. 7377 |
| ELF4          | 2. 823546 | 2. 356122 | 44. 05028 | 2. 93E-137 | 1. 45E-134 | 302. 5042 |
| AIFM1         | 1. 164034 | 3. 933426 | 23. 45374 | 2. 85E-71  | 3. 67E-70  | 150. 2542 |
| RAB33A        | 1. 081174 | 0. 639876 | 25. 87029 | 3. 70E-80  | 6. 36E-79  | 170. 7474 |
| RBMX2         | 1. 230522 | 3. 484642 | 24. 04749 | 1. 76E-73  | 2. 44E-72  | 155. 3471 |

|              |           |           |           |            |            |           |
|--------------|-----------|-----------|-----------|------------|------------|-----------|
| ENOX2        | 1. 383094 | 2. 132719 | 26. 9236  | 6. 08E-84  | 1. 20E-82  | 179. 4745 |
| STK26        | 1. 956736 | 1. 979173 | 35. 01722 | 4. 91E-111 | 3. 96E-109 | 241. 9805 |
| MBNL3        | 1. 059011 | 1. 674789 | 19. 96591 | 5. 08E-58  | 4. 53E-57  | 119. 7152 |
| GPC4         | 1. 260897 | 2. 874837 | 19. 38432 | 8. 92E-56  | 7. 55E-55  | 114. 5444 |
| GPC3         | 1. 059768 | 2. 632747 | 10. 07432 | 6. 80E-21  | 2. 76E-20  | 34. 37379 |
| RP3-417G15.1 | 1. 313996 | 2. 146139 | 15. 94418 | 1. 90E-42  | 1. 20E-41  | 83. 85759 |
| HPRT1        | 1. 521655 | 4. 149297 | 24. 50596 | 3. 56E-75  | 5. 22E-74  | 159. 2546 |
| FAM122B      | 1. 059439 | 3. 367255 | 18. 87151 | 8. 60E-54  | 6. 95E-53  | 109. 9743 |
| FAM122C      | 1. 018364 | 1. 088666 | 23. 70408 | 3. 33E-72  | 4. 40E-71  | 152. 4058 |
| MOSPD1       | 1. 158947 | 2. 198375 | 23. 72624 | 2. 75E-72  | 3. 65E-71  | 152. 596  |
| SMIM10       | 1. 211116 | 1. 789912 | 22. 08578 | 3. 99E-66  | 4. 42E-65  | 138. 3922 |
| FAM127C      | 1. 407579 | 2. 422657 | 22. 58634 | 5. 12E-68  | 5. 99E-67  | 142. 7525 |
| FAM127A      | 2. 062596 | 5. 51846  | 26. 93768 | 5. 42E-84  | 1. 07E-82  | 179. 5902 |
| FAM127B      | 1. 964361 | 5. 092754 | 29. 04729 | 2. 15E-91  | 5. 85E-90  | 196. 6641 |
| MMGT1        | 1. 371271 | 2. 954623 | 25. 72252 | 1. 27E-79  | 2. 15E-78  | 169. 5127 |
| SLC9A6       | 1. 523859 | 1. 940685 | 34. 8274  | 1. 93E-110 | 1. 49E-108 | 240. 6076 |
| FHL1         | 1. 217134 | 3. 606933 | 11. 25047 | 6. 16E-25  | 2. 73E-24  | 43. 63079 |
| HTATSF1      | 1. 769897 | 4. 090477 | 31. 67056 | 2. 91E-100 | 1. 23E-98  | 217. 1244 |
| VGLL1        | 2. 375806 | 1. 473572 | 19. 32451 | 1. 52E-55  | 1. 28E-54  | 114. 0119 |
| ARHGEF6      | 1. 360634 | 1. 764015 | 19. 02505 | 2. 19E-54  | 1. 79E-53  | 111. 3436 |
| ATP11C       | 1. 223849 | 2. 119175 | 23. 1578  | 3. 65E-70  | 4. 56E-69  | 147. 7028 |
| LDOC1        | 1. 033982 | 3. 692914 | 11. 82712 | 5. 49E-27  | 2. 54E-26  | 48. 3321  |
| FTH1P8       | 2. 409932 | 2. 196284 | 39. 71197 | 3. 69E-125 | 7. 18E-123 | 274. 5764 |
| IDS          | 1. 855803 | 4. 280675 | 24. 47328 | 4. 70E-75  | 6. 86E-74  | 158. 9768 |
| TMEM185A     | 1. 62247  | 3. 200788 | 32. 75804 | 7. 89E-104 | 4. 13E-102 | 225. 3535 |
| MTM1         | 1. 21822  | 1. 97668  | 23. 76583 | 1. 96E-72  | 2. 62E-71  | 152. 9356 |
| CD99L2       | 1. 039809 | 3. 529075 | 14. 39836 | 1. 60E-36  | 8. 99E-36  | 70. 22865 |
| HMGB3        | 1. 854319 | 3. 666971 | 21. 69853 | 1. 18E-64  | 1. 25E-63  | 135. 0045 |
| VMA21        | 1. 32658  | 2. 67049  | 31. 19515 | 1. 10E-98  | 4. 29E-97  | 213. 4804 |
| CETN2        | 2. 239486 | 4. 320842 | 36. 65422 | 4. 35E-116 | 4. 84E-114 | 253. 6402 |
| NSDHL        | 2. 062389 | 3. 306541 | 38. 02879 | 3. 18E-120 | 4. 51E-118 | 263. 1852 |
| ZNF185       | 2. 708614 | 2. 411732 | 34. 05295 | 5. 42E-108 | 3. 60E-106 | 234. 9606 |
| HAUS7        | 1. 383384 | 3. 450338 | 22. 82909 | 6. 25E-69  | 7. 51E-68  | 144. 859  |
| BGN          | 4. 564777 | 6. 707949 | 38. 10342 | 1. 91E-120 | 2. 76E-118 | 263. 6972 |
| FAM58A       | 1. 370775 | 3. 762458 | 25. 60999 | 3. 25E-79  | 5. 44E-78  | 168. 5708 |
| SLC6A8       | 2. 063577 | 3. 942796 | 15. 94415 | 1. 90E-42  | 1. 20E-41  | 83. 85734 |
| BCAP31       | 1. 944996 | 6. 772317 | 29. 06384 | 1. 88E-91  | 5. 16E-90  | 196. 7958 |
| PLXNB3       | 1. 094055 | 2. 656728 | 11. 39425 | 1. 92E-25  | 8. 58E-25  | 44. 7939  |
| IDH3G        | 1. 336036 | 4. 913135 | 22. 83536 | 5. 92E-69  | 7. 12E-68  | 144. 9134 |
| LICAM        | 1. 321637 | 1. 467202 | 11. 8563  | 4. 31E-27  | 2. 00E-26  | 48. 57251 |
| ARHGAP4      | 1. 768443 | 3. 457621 | 16. 64976 | 3. 55E-45  | 2. 38E-44  | 90. 13648 |
| NAA10        | 1. 041619 | 5. 69598  | 16. 03016 | 8. 85E-43  | 5. 65E-42  | 84. 62139 |
| RENBP        | 2. 504967 | 2. 254442 | 33. 95184 | 1. 14E-107 | 7. 40E-106 | 234. 2179 |
| HCFC1        | 1. 262216 | 3. 581429 | 22. 58785 | 5. 06E-68  | 5. 91E-67  | 142. 7656 |
| IRAK1        | 1. 435111 | 5. 254203 | 20. 13918 | 1. 09E-58  | 9. 93E-58  | 121. 2525 |
| MECP2        | 1. 455571 | 3. 494075 | 26. 08152 | 6. 38E-81  | 1. 12E-79  | 172. 5079 |
| FLNA         | 2. 949183 | 7. 466536 | 26. 06979 | 7. 03E-81  | 1. 24E-79  | 172. 4103 |
| DNASE1L1     | 2. 111364 | 3. 589105 | 33. 6262  | 1. 25E-106 | 7. 61E-105 | 231. 8174 |
| H17-340M24.  | 1. 584054 | 2. 395262 | 29. 48893 | 6. 50E-93  | 1. 90E-91  | 200. 169  |
| ATP6AP1      | 1. 899527 | 5. 705738 | 30. 86681 | 1. 38E-97  | 5. 09E-96  | 210. 9471 |
| GDI1         | 1. 210931 | 5. 754421 | 15. 83523 | 5. 00E-42  | 3. 14E-41  | 82. 89052 |
| FAM50A       | 1. 655912 | 5. 481884 | 23. 70723 | 3. 24E-72  | 4. 29E-71  | 152. 4329 |
| LAGE3        | 1. 159586 | 4. 255508 | 18. 86272 | 9. 30E-54  | 7. 50E-53  | 109. 8959 |
| SLC10A3      | 1. 732476 | 4. 026879 | 27. 30442 | 2. 69E-85  | 5. 56E-84  | 182. 5974 |

|             |          |          |          |           |           |          |
|-------------|----------|----------|----------|-----------|-----------|----------|
| G6PD        | 2.054854 | 3.753871 | 32.63421 | 1.99E-103 | 1.02E-101 | 224.424  |
| IKBKG       | 1.262744 | 3.596096 | 21.97763 | 1.03E-65  | 1.12E-64  | 137.4474 |
| IKBKGP1     | 1.058368 | 0.749593 | 18.0897  | 9.23E-51  | 6.94E-50  | 102.9942 |
| HMG1P37     | 2.187703 | 1.082283 | 49.30422 | 8.20E-151 | 1.13E-147 | 333.7892 |
| F8A1        | 1.617343 | 3.791334 | 20.2801  | 3.14E-59  | 2.89E-58  | 122.5016 |
| BRCC3       | 1.627562 | 2.804098 | 32.24664 | 3.68E-102 | 1.73E-100 | 221.5021 |
| VBP1        | 1.592015 | 3.776327 | 28.57442 | 9.34E-90  | 2.34E-88  | 192.8845 |
| CLIC2       | 1.746479 | 1.909175 | 21.80792 | 4.52E-65  | 4.87E-64  | 135.9627 |
| P13-228J13. | 1.006572 | 1.31152  | 13.32003 | 1.85E-32  | 9.62E-32  | 60.8924  |
| TMLHE       | 1.255371 | 2.426855 | 26.58891 | 9.56E-83  | 1.80E-81  | 176.7156 |
| VAMP7       | 1.569195 | 3.316939 | 27.09025 | 1.55E-84  | 3.11E-83  | 180.8433 |
| MT-RNR1     | 1.665874 | 9.586552 | 14.76922 | 6.19E-38  | 3.59E-37  | 73.47693 |
| MT-RNR2     | 1.324273 | 11.51761 | 10.50581 | 2.36E-22  | 9.89E-22  | 37.71321 |
| MT-CO1      | 1.175466 | 13.02517 | 7.5965   | 3.44E-13  | 1.16E-12  | 16.79888 |
| MT-ND6      | 1.361055 | 10.84978 | 9.383769 | 1.27E-18  | 4.89E-18  | 29.18379 |

**Table S4. The 1305 DEGs between the high-risk group and the low-risk group**

|           | baseMean | log2FoldChang | lfcSE    | stat     | pvalue   | padj     |
|-----------|----------|---------------|----------|----------|----------|----------|
| AMY2B     | 7979.991 | 3.579570462   | 0.378368 | 9.460547 | 3.06E-21 | 1.13E-16 |
| THrsp     | 21.22727 | 3.627576381   | 0.387763 | 9.355129 | 8.35E-21 | 1.54E-16 |
| TMED6     | 258.2693 | 2.284821363   | 0.265634 | 8.601398 | 7.88E-18 | 4.42E-14 |
| P2RX1     | 349.9453 | 1.910327105   | 0.222293 | 8.59373  | 8.42E-18 | 4.42E-14 |
| MET       | 7967.424 | -1.06938763   | 0.129667 | -8.24715 | 1.62E-16 | 6.63E-13 |
| CTRL      | 67.47473 | 3.200699058   | 0.398037 | 8.041203 | 8.90E-16 | 2.40E-12 |
| FGL1      | 949.2801 | 3.131865963   | 0.38964  | 8.037845 | 9.14E-16 | 2.40E-12 |
| LINC00926 | 403.6192 | 2.037855361   | 0.253107 | 8.051345 | 8.19E-16 | 2.40E-12 |
| GPHA2     | 121.8905 | 3.623033087   | 0.456852 | 7.930434 | 2.18E-15 | 4.72E-12 |
| ITGA2     | 7201.023 | -1.00795325   | 0.127376 | -7.91324 | 2.51E-15 | 4.85E-12 |
| SPINK4    | 344.1787 | 3.075094306   | 0.388517 | 7.914945 | 2.47E-15 | 4.85E-12 |
| PEX5L     | 30.82446 | 1.914110022   | 0.244815 | 7.818597 | 5.34E-15 | 8.93E-12 |
| SLC14A1   | 562.6279 | -2.29355401   | 0.295494 | -7.76177 | 8.38E-15 | 1.28E-11 |
| RASGRP2   | 648.149  | 1.653851109   | 0.214154 | 7.722708 | 1.14E-14 | 1.61E-11 |
| NKAIN2    | 16.94061 | 1.959346984   | 0.256068 | 7.65168  | 1.98E-14 | 2.52E-11 |
| PPL       | 8468.579 | -1.0529277    | 0.137558 | -7.65442 | 1.94E-14 | 2.52E-11 |
| TEX11     | 118.6351 | 2.068482892   | 0.270179 | 7.65598  | 1.92E-14 | 2.52E-11 |
| BRSK2     | 211.6128 | 1.846658599   | 0.241732 | 7.639286 | 2.18E-14 | 2.68E-11 |
| FAM110D   | 141.8973 | 1.161387383   | 0.152351 | 7.623121 | 2.48E-14 | 2.79E-11 |
| SPX       | 56.70406 | 2.875818324   | 0.378046 | 7.607056 | 2.80E-14 | 3.03E-11 |
| KLK1      | 7945.494 | 2.814825954   | 0.372114 | 7.564421 | 3.90E-14 | 3.87E-11 |
| CLEC3B    | 281.5234 | 1.149993323   | 0.153115 | 7.510637 | 5.88E-14 | 5.28E-11 |
| PEBP4     | 21.52016 | 1.426080712   | 0.190061 | 7.503262 | 6.22E-14 | 5.41E-11 |
| ZG16      | 50.6921  | 3.211248541   | 0.42887  | 7.487696 | 7.01E-14 | 5.73E-11 |
| PART1     | 40.35999 | 2.110225019   | 0.283024 | 7.45599  | 8.92E-14 | 6.83E-11 |
| KLB       | 56.81324 | 2.040683917   | 0.274571 | 7.432275 | 1.07E-13 | 7.41E-11 |
| IL24      | 156.9522 | 1.763307797   | 0.237191 | 7.434129 | 1.05E-13 | 7.41E-11 |
| TRPM6     | 41.21968 | 1.473911681   | 0.199099 | 7.402902 | 1.33E-13 | 9.07E-11 |
| UCA1      | 1462.006 | -2.08205845   | 0.281766 | -7.38932 | 1.48E-13 | 9.69E-11 |
| CD37      | 1943.611 | 1.406351268   | 0.190265 | 7.391548 | 1.45E-13 | 9.69E-11 |
| LINGO3    | 34.81172 | 1.858140445   | 0.252137 | 7.369554 | 1.71E-13 | 1.09E-10 |
| SOX17     | 169.1317 | 1.02676738    | 0.139431 | 7.363985 | 1.78E-13 | 1.11E-10 |
| ATP4A     | 7.035701 | 2.985531458   | 0.405936 | 7.354677 | 1.91E-13 | 1.14E-10 |
| SNTG2     | 34.18593 | 1.7632163     | 0.239696 | 7.356042 | 1.89E-13 | 1.14E-10 |
| SNTG2.1   | 34.18593 | 1.7632163     | 0.239696 | 7.356042 | 1.89E-13 | 1.14E-10 |
| SNTG2.2   | 34.18593 | 1.7632163     | 0.239696 | 7.356042 | 1.89E-13 | 1.14E-10 |
| SLC1A2    | 161.5753 | 1.93765208    | 0.263687 | 7.348312 | 2.01E-13 | 1.14E-10 |
| TNFRSF13C | 411.9325 | 2.233799957   | 0.304434 | 7.33754  | 2.18E-13 | 1.19E-10 |
| TBC1D10C  | 566.4839 | 1.435648363   | 0.196013 | 7.324249 | 2.40E-13 | 1.26E-10 |
| MPZ       | 114.9438 | 1.199995364   | 0.164121 | 7.31163  | 2.64E-13 | 1.33E-10 |
| CAMK2N2   | 74.4005  | 1.435870776   | 0.19732  | 7.276863 | 3.42E-13 | 1.65E-10 |
| GNG7      | 607.7579 | 1.061449116   | 0.146329 | 7.253872 | 4.05E-13 | 1.87E-10 |
| TMEM52    | 239.4597 | 2.092407191   | 0.289147 | 7.236487 | 4.60E-13 | 2.07E-10 |
| RADIL     | 94.98507 | 1.112241959   | 0.153681 | 7.237348 | 4.58E-13 | 2.07E-10 |
| KCNG2     | 9.389496 | 1.494352073   | 0.206671 | 7.230595 | 4.81E-13 | 2.13E-10 |
| CD22      | 743.5033 | 1.952040355   | 0.271405 | 7.19234  | 6.37E-13 | 2.66E-10 |
| FXYD1     | 46.43459 | 1.008966134   | 0.140665 | 7.172823 | 7.35E-13 | 3.04E-10 |
| KIF26A    | 244.4898 | 1.040646239   | 0.145278 | 7.163144 | 7.88E-13 | 3.15E-10 |
| CD19      | 294.7097 | 2.45218924    | 0.34249  | 7.159892 | 8.07E-13 | 3.19E-10 |
| PLAT      | 24853.61 | -1.37454383   | 0.192655 | -7.13476 | 9.70E-13 | 3.79E-10 |

|           |          |             |          |          |          |          |
|-----------|----------|-------------|----------|----------|----------|----------|
| PLA2G2A   | 2294.378 | 2.561606329 | 0.361324 | 7.089505 | 1.35E-12 | 5.00E-10 |
| CFD       | 972.2156 | 1.372100245 | 0.193588 | 7.087738 | 1.36E-12 | 5.01E-10 |
| CFD.1     | 972.2156 | 1.372100245 | 0.193588 | 7.087738 | 1.36E-12 | 5.01E-10 |
| KIF19     | 80.57148 | 1.46736822  | 0.207406 | 7.074864 | 1.50E-12 | 5.39E-10 |
| P2RX5     | 201.7879 | 2.063588604 | 0.291971 | 7.067797 | 1.57E-12 | 5.51E-10 |
| ATP1B2    | 158.2633 | 1.012207256 | 0.143199 | 7.06856  | 1.57E-12 | 5.51E-10 |
| FCER2     | 208.6007 | 2.882759977 | 0.4086   | 7.055213 | 1.72E-12 | 5.98E-10 |
| C6orf58   | 21.4493  | 2.07284811  | 0.29427  | 7.044023 | 1.87E-12 | 6.36E-10 |
| MYOC      | 12.22329 | 2.421932191 | 0.344492 | 7.030436 | 2.06E-12 | 6.88E-10 |
| ARHGAP9   | 707.7369 | 1.105571041 | 0.157476 | 7.020551 | 2.21E-12 | 7.25E-10 |
| MATN4     | 34.03759 | 1.801405988 | 0.256633 | 7.019379 | 2.23E-12 | 7.25E-10 |
| CD79B     | 604.4957 | 1.970744909 | 0.281263 | 7.006761 | 2.44E-12 | 7.80E-10 |
| ANLN      | 1438.028 | -1.0386097  | 0.148516 | -6.99326 | 2.69E-12 | 8.16E-10 |
| SNX22     | 193.0207 | 1.083137695 | 0.154867 | 6.993975 | 2.67E-12 | 8.16E-10 |
| FITM1     | 32.35835 | 1.410564201 | 0.202294 | 6.972826 | 3.11E-12 | 9.29E-10 |
| FITM1.1   | 32.35835 | 1.410564201 | 0.202294 | 6.972826 | 3.11E-12 | 9.29E-10 |
| SLC6A16   | 74.83294 | 1.003362198 | 0.143973 | 6.969088 | 3.19E-12 | 9.46E-10 |
| ZAP70     | 397.5734 | 1.409909479 | 0.203891 | 6.915004 | 4.68E-12 | 1.30E-09 |
| CTRC      | 56607.68 | 3.642416354 | 0.529674 | 6.876708 | 6.13E-12 | 1.64E-09 |
| MATK      | 185.5145 | 1.00671901  | 0.146404 | 6.876324 | 6.14E-12 | 1.64E-09 |
| SNHG9     | 180.3013 | 1.102746616 | 0.160508 | 6.870344 | 6.40E-12 | 1.68E-09 |
| ERP27     | 2087.182 | 2.276144932 | 0.332936 | 6.836589 | 8.11E-12 | 2.00E-09 |
| RASAL3    | 669.9218 | 1.097448958 | 0.160649 | 6.831326 | 8.41E-12 | 2.06E-09 |
| PROK1     | 18.4253  | 2.213465287 | 0.324321 | 6.824912 | 8.80E-12 | 2.11E-09 |
| BPIFB4    | 5.139813 | 3.490918528 | 0.511655 | 6.822803 | 8.93E-12 | 2.13E-09 |
| NEU4      | 34.13807 | 1.926512173 | 0.282643 | 6.816058 | 9.36E-12 | 2.21E-09 |
| NEU4.1    | 34.13807 | 1.926512173 | 0.282643 | 6.816058 | 9.36E-12 | 2.21E-09 |
| DIRAS1    | 156.6929 | 1.19315211  | 0.175169 | 6.811438 | 9.66E-12 | 2.24E-09 |
| CD79A     | 1167.963 | 2.125141506 | 0.31236  | 6.803495 | 1.02E-11 | 2.35E-09 |
| GCAT      | 685.5329 | 1.194900463 | 0.176088 | 6.785809 | 1.15E-11 | 2.59E-09 |
| FCRL2     | 117.4261 | 2.27739329  | 0.335687 | 6.784268 | 1.17E-11 | 2.60E-09 |
| RBPJL     | 779.0404 | 3.386876231 | 0.499386 | 6.782079 | 1.18E-11 | 2.62E-09 |
| LINC00861 | 142.1204 | 1.713789147 | 0.253565 | 6.758779 | 1.39E-11 | 2.99E-09 |
| LIMD2     | 1349.628 | 1.083641891 | 0.160914 | 6.734294 | 1.65E-11 | 3.46E-09 |
| STAP1     | 94.94469 | 1.853967549 | 0.275578 | 6.727552 | 1.73E-11 | 3.59E-09 |
| CLEC17A   | 64.52658 | 2.179314788 | 0.324155 | 6.72307  | 1.78E-11 | 3.68E-09 |
| AQP12B    | 67.65171 | 2.993219147 | 0.445772 | 6.714683 | 1.88E-11 | 3.87E-09 |
| GZMM      | 84.81285 | 1.342386437 | 0.200022 | 6.711195 | 1.93E-11 | 3.94E-09 |
| HCAR1     | 265.6401 | -1.57524851 | 0.235059 | -6.70149 | 2.06E-11 | 4.17E-09 |
| CELA2B    | 6890.43  | 3.428471516 | 0.511669 | 6.70057  | 2.08E-11 | 4.17E-09 |
| RPS3AP5   | 40.6919  | 1.492752602 | 0.223227 | 6.687158 | 2.28E-11 | 4.50E-09 |
| CD300LG   | 26.60462 | 2.312613319 | 0.345967 | 6.684494 | 2.32E-11 | 4.56E-09 |
| LINC01251 | 7.50655  | 2.154424255 | 0.322486 | 6.680674 | 2.38E-11 | 4.65E-09 |
| NPHS1     | 135.744  | 1.859239484 | 0.278655 | 6.672183 | 2.52E-11 | 4.88E-09 |
| ACAP1     | 831.0279 | 1.154699658 | 0.173352 | 6.660999 | 2.72E-11 | 5.16E-09 |
| ACAP1.1   | 831.0279 | 1.154699658 | 0.173352 | 6.660999 | 2.72E-11 | 5.16E-09 |
| TSPAN7    | 744.291  | 1.179205354 | 0.177253 | 6.652685 | 2.88E-11 | 5.40E-09 |
| AMY2A     | 19834.69 | 4.240219337 | 0.638667 | 6.639174 | 3.15E-11 | 5.89E-09 |
| SYCN      | 12504.52 | 4.08355747  | 0.616886 | 6.619629 | 3.60E-11 | 6.43E-09 |
| GSDMC     | 111.9099 | -1.61872121 | 0.244972 | -6.60779 | 3.90E-11 | 6.93E-09 |
| GSDMC.1   | 111.9099 | -1.61872121 | 0.244972 | -6.60779 | 3.90E-11 | 6.93E-09 |
| CLEC4G    | 21.84019 | 1.958928899 | 0.297669 | 6.5809   | 4.68E-11 | 7.97E-09 |
| NCR3      | 41.99105 | 1.579128051 | 0.240188 | 6.574553 | 4.88E-11 | 8.23E-09 |
| NCR3.1    | 41.99105 | 1.579128051 | 0.240188 | 6.574553 | 4.88E-11 | 8.23E-09 |



|           |          |             |          |          |          |          |
|-----------|----------|-------------|----------|----------|----------|----------|
| NCR3.2    | 41.99105 | 1.579128051 | 0.240188 | 6.574553 | 4.88E-11 | 8.23E-09 |
| NCR3.3    | 41.99105 | 1.579128051 | 0.240188 | 6.574553 | 4.88E-11 | 8.23E-09 |
| NCR3.4    | 41.99105 | 1.579128051 | 0.240188 | 6.574553 | 4.88E-11 | 8.23E-09 |
| NCR3.5    | 41.99105 | 1.579128051 | 0.240188 | 6.574553 | 4.88E-11 | 8.23E-09 |
| NCR3.6    | 41.99105 | 1.579128051 | 0.240188 | 6.574553 | 4.88E-11 | 8.23E-09 |
| NCR3.7    | 41.99105 | 1.579128051 | 0.240188 | 6.574553 | 4.88E-11 | 8.23E-09 |
| PNLIP     | 274224.3 | 4.243370533 | 0.649369 | 6.534607 | 6.38E-11 | 1.03E-08 |
| PLIN1     | 363.8179 | 2.302060697 | 0.352407 | 6.532396 | 6.47E-11 | 1.04E-08 |
| KCNK3     | 681.6878 | 1.579659469 | 0.243042 | 6.499536 | 8.06E-11 | 1.26E-08 |
| XDH       | 1399.255 | -1.17342436 | 0.180529 | -6.49993 | 8.04E-11 | 1.26E-08 |
| CETP      | 89.70515 | 1.117298188 | 0.172167 | 6.489603 | 8.61E-11 | 1.32E-08 |
| SLITRK1   | 15.89245 | 2.010981639 | 0.309987 | 6.487311 | 8.74E-11 | 1.34E-08 |
| SERPINB5  | 3308.511 | -1.10277006 | 0.170134 | -6.48179 | 9.06E-11 | 1.37E-08 |
| HAS1      | 204.0087 | 2.024582796 | 0.312673 | 6.475086 | 9.48E-11 | 1.41E-08 |
| CUZD1     | 6831.511 | 2.740285909 | 0.424396 | 6.456911 | 1.07E-10 | 1.56E-08 |
| FBN3      | 16.1006  | -2.04661862 | 0.317428 | -6.44751 | 1.14E-10 | 1.63E-08 |
| MAP4K1    | 502.6113 | 1.237104694 | 0.191858 | 6.448019 | 1.13E-10 | 1.63E-08 |
| MAP4K1.1  | 502.6113 | 1.237104694 | 0.191858 | 6.448019 | 1.13E-10 | 1.63E-08 |
| E2F7      | 173.214  | -1.05329406 | 0.1635   | -6.44217 | 1.18E-10 | 1.67E-08 |
| ACTC1     | 74.33958 | 1.740532796 | 0.270328 | 6.438595 | 1.21E-10 | 1.70E-08 |
| PI16      | 435.5579 | 2.018946459 | 0.313794 | 6.433988 | 1.24E-10 | 1.74E-08 |
| CCR7      | 526.5312 | 1.719929235 | 0.267579 | 6.427733 | 1.30E-10 | 1.79E-08 |
| TTYH1     | 438.4447 | 1.6732296   | 0.260331 | 6.427328 | 1.30E-10 | 1.79E-08 |
| TTYH1.1   | 438.4447 | 1.6732296   | 0.260331 | 6.427328 | 1.30E-10 | 1.79E-08 |
| TTYH1.2   | 438.4447 | 1.6732296   | 0.260331 | 6.427328 | 1.30E-10 | 1.79E-08 |
| TTYH1.3   | 438.4447 | 1.6732296   | 0.260331 | 6.427328 | 1.30E-10 | 1.79E-08 |
| XPNPEP2   | 78.21523 | 1.725112319 | 0.269228 | 6.40762  | 1.48E-10 | 1.98E-08 |
| PCED1B-AS | 351.3519 | 1.02848932  | 0.160614 | 6.403492 | 1.52E-10 | 2.02E-08 |
| VPREB3    | 149.5643 | 2.256393288 | 0.352486 | 6.401368 | 1.54E-10 | 2.03E-08 |
| TRAF3IP3  | 433.6393 | 1.227341863 | 0.191958 | 6.393797 | 1.62E-10 | 2.11E-08 |
| SLC43A1   | 1310.831 | 1.089735769 | 0.170535 | 6.390101 | 1.66E-10 | 2.14E-08 |
| AQP12A    | 34.9692  | 3.146336031 | 0.492718 | 6.385673 | 1.71E-10 | 2.17E-08 |
| AQP8      | 1260.168 | 3.176384771 | 0.497569 | 6.383805 | 1.73E-10 | 2.19E-08 |
| VIPR2     | 67.51433 | 1.495012291 | 0.235434 | 6.350021 | 2.15E-10 | 2.68E-08 |
| ARC       | 113.5479 | 1.839011113 | 0.289656 | 6.348951 | 2.17E-10 | 2.69E-08 |
| CEL       | 72377.58 | 3.564202966 | 0.562373 | 6.337789 | 2.33E-10 | 2.88E-08 |
| BRINP2    | 10.13212 | 1.664286102 | 0.263435 | 6.317638 | 2.66E-10 | 3.22E-08 |
| XKR4      | 39.14362 | 1.48012268  | 0.23484  | 6.302677 | 2.93E-10 | 3.52E-08 |
| ZC3H12D   | 143.574  | 1.120628244 | 0.177858 | 6.30068  | 2.96E-10 | 3.55E-08 |
| PRODH2    | 7.050726 | 1.983762612 | 0.314973 | 6.298194 | 3.01E-10 | 3.60E-08 |
| CCDC69    | 1530.782 | 1.008176413 | 0.160285 | 6.28988  | 3.18E-10 | 3.77E-08 |
| TRBV28    | 275.5195 | 1.24609791  | 0.198118 | 6.289669 | 3.18E-10 | 3.77E-08 |
| BLK       | 302.7819 | 2.292369288 | 0.364962 | 6.281118 | 3.36E-10 | 3.94E-08 |
| BLK.1     | 302.7819 | 2.292369288 | 0.364962 | 6.281118 | 3.36E-10 | 3.94E-08 |
| PHACTR3   | 787.1102 | -1.54767758 | 0.246889 | -6.26872 | 3.64E-10 | 4.20E-08 |
| SPSB4     | 72.63913 | 1.150850014 | 0.183607 | 6.268007 | 3.66E-10 | 4.20E-08 |
| CD27      | 265.795  | 1.32449489  | 0.211355 | 6.26667  | 3.69E-10 | 4.23E-08 |
| PLA2G1B   | 31705.74 | 3.373656267 | 0.538738 | 6.262148 | 3.80E-10 | 4.30E-08 |
| RHOH      | 433.5671 | 1.256341561 | 0.200737 | 6.258632 | 3.88E-10 | 4.38E-08 |
| POMC      | 57.39546 | 1.253346855 | 0.200278 | 6.258031 | 3.90E-10 | 4.38E-08 |
| FAM181B   | 33.8784  | 1.222575192 | 0.195918 | 6.240232 | 4.37E-10 | 4.83E-08 |
| ZNF98     | 15.70645 | 1.571230051 | 0.251896 | 6.237606 | 4.44E-10 | 4.89E-08 |
| RAB26     | 390.0653 | 1.229187984 | 0.197171 | 6.234123 | 4.54E-10 | 4.95E-08 |
| ITGAD     | 21.82217 | 1.193967777 | 0.191525 | 6.233989 | 4.55E-10 | 4.95E-08 |

|           |          |             |          |          |          |          |
|-----------|----------|-------------|----------|----------|----------|----------|
| COR01A    | 3064.183 | 1.104911962 | 0.177291 | 6.232201 | 4.60E-10 | 4.98E-08 |
| CALML3    | 13.33601 | 3.090890065 | 0.496618 | 6.223883 | 4.85E-10 | 5.20E-08 |
| GSG1      | 11.84694 | 1.932253102 | 0.310534 | 6.222358 | 4.90E-10 | 5.21E-08 |
| CELA3A    | 123465.2 | 3.507557687 | 0.563711 | 6.222258 | 4.90E-10 | 5.21E-08 |
| NEURL1    | 673.0358 | 1.404552762 | 0.225907 | 6.217405 | 5.05E-10 | 5.36E-08 |
| AMER2     | 6.386145 | 1.986263133 | 0.319676 | 6.213356 | 5.19E-10 | 5.48E-08 |
| HSPB6     | 1730.106 | 1.172605209 | 0.188765 | 6.211986 | 5.23E-10 | 5.50E-08 |
| APOE      | 14679.73 | 1.164250874 | 0.187507 | 6.209099 | 5.33E-10 | 5.58E-08 |
| SHISA8    | 8.676046 | 2.13135399  | 0.343566 | 6.203629 | 5.52E-10 | 5.73E-08 |
| RTP5      | 9.735489 | 1.936207217 | 0.312709 | 6.191718 | 5.95E-10 | 6.15E-08 |
| RTP5.1    | 9.735489 | 1.936207217 | 0.312709 | 6.191718 | 5.95E-10 | 6.15E-08 |
| DHH       | 26.86531 | 1.079506482 | 0.174472 | 6.187262 | 6.12E-10 | 6.31E-08 |
| GALNT8    | 98.89337 | 1.217179902 | 0.196798 | 6.184913 | 6.21E-10 | 6.38E-08 |
| C2CD4B    | 431.6391 | 1.361004548 | 0.220096 | 6.18369  | 6.26E-10 | 6.42E-08 |
| PACSIN1   | 91.55455 | 1.208069152 | 0.19541  | 6.182214 | 6.32E-10 | 6.46E-08 |
| RAB39B    | 89.92383 | 1.277719987 | 0.206893 | 6.175738 | 6.59E-10 | 6.67E-08 |
| LINC00402 | 19.19583 | 2.111050689 | 0.341995 | 6.172746 | 6.71E-10 | 6.76E-08 |
| ACSL6     | 78.184   | 1.209140633 | 0.195936 | 6.171085 | 6.78E-10 | 6.80E-08 |
| CELA2A    | 31278.83 | 3.750998715 | 0.608136 | 6.168024 | 6.91E-10 | 6.91E-08 |
| MAT1A     | 145.2723 | 1.676536712 | 0.271898 | 6.166061 | 7.00E-10 | 6.98E-08 |
| LGALS12   | 39.73436 | 1.558281142 | 0.252734 | 6.165686 | 7.02E-10 | 6.98E-08 |
| PRSS1     | 179497.3 | 3.390807083 | 0.550053 | 6.164509 | 7.07E-10 | 7.01E-08 |
| PRSS1.1   | 179497.3 | 3.390807083 | 0.550053 | 6.164509 | 7.07E-10 | 7.01E-08 |
| TNFRSF13E | 64.84538 | 2.097192664 | 0.340472 | 6.15967  | 7.29E-10 | 7.17E-08 |
| ARRDC5    | 20.77153 | 1.075001598 | 0.174623 | 6.15613  | 7.45E-10 | 7.27E-08 |
| ATP1A2    | 219.4597 | 1.657853367 | 0.269528 | 6.15095  | 7.70E-10 | 7.47E-08 |
| ADAD2     | 9.164109 | 1.188701314 | 0.193498 | 6.14321  | 8.09E-10 | 7.79E-08 |
| FCRLA     | 210.6445 | 2.245454425 | 0.365623 | 6.14144  | 8.18E-10 | 7.85E-08 |
| CXCR4     | 5800.766 | 1.021036361 | 0.166355 | 6.137698 | 8.37E-10 | 7.98E-08 |
| CD36      | 1230.697 | 1.248139893 | 0.203729 | 6.126469 | 8.99E-10 | 8.41E-08 |
| CDHR1     | 32.62685 | 1.209205531 | 0.197339 | 6.12757  | 8.92E-10 | 8.41E-08 |
| TMC8      | 1248.352 | 1.045110679 | 0.170575 | 6.126987 | 8.96E-10 | 8.41E-08 |
| CD52      | 1538.72  | 1.174398968 | 0.19168  | 6.12686  | 8.96E-10 | 8.41E-08 |
| SELL      | 1143.246 | 1.40157329  | 0.22884  | 6.124679 | 9.09E-10 | 8.46E-08 |
| IL2ORB    | 708.5177 | -1.79668145 | 0.293379 | -6.12409 | 9.12E-10 | 8.47E-08 |
| KCNA5     | 109.8511 | 1.326531813 | 0.21682  | 6.118115 | 9.47E-10 | 8.71E-08 |
| SLC2A1    | 16423.85 | -1.07823578 | 0.176322 | -6.11514 | 9.65E-10 | 8.85E-08 |
| CCKBR     | 49.07083 | 1.809058322 | 0.296399 | 6.103459 | 1.04E-09 | 9.38E-08 |
| CELA3B    | 26257.92 | 3.293009729 | 0.53979  | 6.100544 | 1.06E-09 | 9.53E-08 |
| AHNAK2    | 9491.13  | -1.02084005 | 0.167395 | -6.09839 | 1.07E-09 | 9.63E-08 |
| DPEP3     | 8.461629 | 1.485948271 | 0.243747 | 6.096285 | 1.09E-09 | 9.69E-08 |
| GJB4      | 577.1156 | -1.14917584 | 0.18884  | -6.08546 | 1.16E-09 | 1.02E-07 |
| DES       | 1781.105 | 2.04529018  | 0.336186 | 6.083806 | 1.17E-09 | 1.03E-07 |
| CRHBP     | 15.83326 | 1.186492335 | 0.195299 | 6.075271 | 1.24E-09 | 1.07E-07 |
| S1PR4     | 272.5068 | 1.054401485 | 0.173888 | 6.063667 | 1.33E-09 | 1.14E-07 |
| LY9       | 179.2518 | 1.35884726  | 0.224128 | 6.062812 | 1.34E-09 | 1.14E-07 |
| GJB6      | 188.0722 | -1.81776535 | 0.300075 | -6.05771 | 1.38E-09 | 1.16E-07 |
| IGF2BP3   | 377.0014 | -1.47855816 | 0.244105 | -6.05707 | 1.39E-09 | 1.17E-07 |
| GAMT      | 911.7613 | 1.099831427 | 0.182024 | 6.042238 | 1.52E-09 | 1.26E-07 |
| TCL1A     | 323.7356 | 2.797276236 | 0.463432 | 6.036003 | 1.58E-09 | 1.31E-07 |
| RBM20     | 45.15391 | 1.162906183 | 0.192899 | 6.028562 | 1.65E-09 | 1.36E-07 |
| DEFA6     | 6.741924 | 3.974358268 | 0.660187 | 6.020047 | 1.74E-09 | 1.42E-07 |
| DEFA6.1   | 6.741924 | 3.974358268 | 0.660187 | 6.020047 | 1.74E-09 | 1.42E-07 |
| KIRREL2   | 342.4257 | 1.626397195 | 0.270377 | 6.015303 | 1.80E-09 | 1.45E-07 |

|           |          |             |          |          |          |          |
|-----------|----------|-------------|----------|----------|----------|----------|
| CD48      | 860.9726 | 1.295839367 | 0.215511 | 6.012872 | 1.82E-09 | 1.46E-07 |
| SLIT3     | 2397.891 | 1.159402121 | 0.192908 | 6.010136 | 1.85E-09 | 1.49E-07 |
| ADORA2B   | 428.8917 | -1.0413197  | 0.173274 | -6.00966 | 1.86E-09 | 1.49E-07 |
| RGN       | 278.6923 | 1.054719946 | 0.175624 | 6.005547 | 1.91E-09 | 1.52E-07 |
| PTPRR     | 482.0781 | -1.1546252  | 0.192346 | -6.00286 | 1.94E-09 | 1.53E-07 |
| KLHDC7B   | 770.0407 | -1.78219077 | 0.297097 | -5.99868 | 1.99E-09 | 1.56E-07 |
| PNMA3     | 49.9609  | 1.17947098  | 0.196723 | 5.995587 | 2.03E-09 | 1.58E-07 |
| LYVE1     | 311.4184 | 1.239010047 | 0.207119 | 5.982123 | 2.20E-09 | 1.69E-07 |
| SCML4     | 118.8339 | 1.186167395 | 0.198312 | 5.981314 | 2.21E-09 | 1.70E-07 |
| ZNF831    | 130.5381 | 1.491496694 | 0.249592 | 5.975735 | 2.29E-09 | 1.74E-07 |
| OSR1      | 243.7871 | 1.268374423 | 0.212244 | 5.976016 | 2.29E-09 | 1.74E-07 |
| TM4SF1-AS | 77.4407  | -1.16039303 | 0.194419 | -5.96853 | 2.39E-09 | 1.81E-07 |
| BANF2     | 7.587075 | 3.067436572 | 0.513962 | 5.968219 | 2.40E-09 | 1.81E-07 |
| UGT1A10   | 842.9924 | -1.44364227 | 0.242196 | -5.96063 | 2.51E-09 | 1.88E-07 |
| TRBV5-4   | 11.84977 | 1.478504874 | 0.248105 | 5.959195 | 2.53E-09 | 1.89E-07 |
| CSN1S1    | 3.782398 | 3.27562776  | 0.549813 | 5.957715 | 2.56E-09 | 1.90E-07 |
| LINC01215 | 70.98812 | 1.816723148 | 0.3056   | 5.944779 | 2.77E-09 | 2.04E-07 |
| DEFA5     | 16.25772 | 4.961784717 | 0.834949 | 5.942621 | 2.81E-09 | 2.06E-07 |
| DEFA5.1   | 16.25772 | 4.961784717 | 0.834949 | 5.942621 | 2.81E-09 | 2.06E-07 |
| CA6       | 2.494367 | 2.346708019 | 0.394905 | 5.942461 | 2.81E-09 | 2.06E-07 |
| BTLA      | 84.93057 | 1.5931219   | 0.268302 | 5.937783 | 2.89E-09 | 2.12E-07 |
| FAM167A-1 | 6.016297 | 2.695078995 | 0.454068 | 5.935404 | 2.93E-09 | 2.14E-07 |
| FAM167A-2 | 6.016297 | 2.695078995 | 0.454068 | 5.935404 | 2.93E-09 | 2.14E-07 |
| CPA1      | 254779.3 | 3.739293863 | 0.630072 | 5.934706 | 2.94E-09 | 2.14E-07 |
| GALNT16   | 337.5043 | 1.031994859 | 0.173888 | 5.934838 | 2.94E-09 | 2.14E-07 |
| DKK1      | 1320.173 | -1.50562294 | 0.253858 | -5.93096 | 3.01E-09 | 2.18E-07 |
| CD7       | 392.1826 | 1.034932142 | 0.174599 | 5.927471 | 3.08E-09 | 2.21E-07 |
| CTSV      | 417.1526 | -1.21048675 | 0.204381 | -5.92269 | 3.17E-09 | 2.27E-07 |
| PCDH15    | 2.666556 | 2.17515822  | 0.367352 | 5.921184 | 3.20E-09 | 2.28E-07 |
| CNR2      | 88.85207 | 2.170511646 | 0.367238 | 5.910369 | 3.41E-09 | 2.42E-07 |
| MUC21     | 46.25722 | -2.31697279 | 0.392348 | -5.9054  | 3.52E-09 | 2.48E-07 |
| MUC21.1   | 46.25722 | -2.31697279 | 0.392348 | -5.9054  | 3.52E-09 | 2.48E-07 |
| MUC21.2   | 46.25722 | -2.31697279 | 0.392348 | -5.9054  | 3.52E-09 | 2.48E-07 |
| MUC21.3   | 46.25722 | -2.31697279 | 0.392348 | -5.9054  | 3.52E-09 | 2.48E-07 |
| MUC21.4   | 46.25722 | -2.31697279 | 0.392348 | -5.9054  | 3.52E-09 | 2.48E-07 |
| MUC21.5   | 46.25722 | -2.31697279 | 0.392348 | -5.9054  | 3.52E-09 | 2.48E-07 |
| MUC21.6   | 46.25722 | -2.31697279 | 0.392348 | -5.9054  | 3.52E-09 | 2.48E-07 |
| CTRB1     | 66734.65 | 3.331097153 | 0.56436  | 5.902428 | 3.58E-09 | 2.51E-07 |
| CTRB1.1   | 66734.65 | 3.331097153 | 0.56436  | 5.902428 | 3.58E-09 | 2.51E-07 |
| CHL1-AS2  | 5.243773 | 1.554976284 | 0.263542 | 5.900292 | 3.63E-09 | 2.54E-07 |
| HAMP      | 146.3486 | 1.286016936 | 0.218093 | 5.896637 | 3.71E-09 | 2.58E-07 |
| PRSS3     | 7015.975 | 1.632207432 | 0.276825 | 5.896174 | 3.72E-09 | 2.59E-07 |
| SDS       | 650.0448 | 1.179265304 | 0.200456 | 5.882924 | 4.03E-09 | 2.74E-07 |
| CELP      | 219.4463 | 2.971883634 | 0.505322 | 5.881164 | 4.07E-09 | 2.76E-07 |
| ACKR1     | 1610.976 | 1.455538885 | 0.247508 | 5.88078  | 4.08E-09 | 2.76E-07 |
| TRIM50    | 57.59422 | 1.961009785 | 0.33404  | 5.870583 | 4.34E-09 | 2.89E-07 |
| CPA2      | 48461.09 | 3.22971091  | 0.550286 | 5.869153 | 4.38E-09 | 2.91E-07 |
| PTX3      | 343.9664 | 1.677983436 | 0.285997 | 5.86714  | 4.43E-09 | 2.94E-07 |
| CYP4F32P  | 2.529864 | 2.348185095 | 0.400624 | 5.861325 | 4.59E-09 | 3.04E-07 |
| IGHD      | 735.8563 | 2.211770251 | 0.37743  | 5.860081 | 4.63E-09 | 3.05E-07 |
| TAGLN3    | 114.763  | 1.605228168 | 0.274887 | 5.839599 | 5.23E-09 | 3.39E-07 |
| MDS2      | 8.862779 | 1.487955369 | 0.254875 | 5.837975 | 5.28E-09 | 3.42E-07 |
| CASP14    | 117.3414 | -3.63715652 | 0.623406 | -5.83433 | 5.40E-09 | 3.47E-07 |
| CMA1      | 21.67823 | 1.914906636 | 0.328574 | 5.827925 | 5.61E-09 | 3.56E-07 |

|           |          |             |          |          |          |          |
|-----------|----------|-------------|----------|----------|----------|----------|
| SCN4A     | 24.95875 | 1.254275609 | 0.215243 | 5.827254 | 5.63E-09 | 3.57E-07 |
| MROH5     | 5.365535 | 1.247856972 | 0.214163 | 5.826665 | 5.65E-09 | 3.58E-07 |
| MROH5.1   | 5.365535 | 1.247856972 | 0.214163 | 5.826665 | 5.65E-09 | 3.58E-07 |
| PAX5      | 338.9565 | 2.202263558 | 0.378034 | 5.825574 | 5.69E-09 | 3.59E-07 |
| CLPS      | 56483.34 | 3.882192505 | 0.666618 | 5.823714 | 5.76E-09 | 3.62E-07 |
| TNNT1     | 536.2727 | -1.78294918 | 0.306144 | -5.82389 | 5.75E-09 | 3.62E-07 |
| SERPINI2  | 1249.536 | 3.046835406 | 0.523279 | 5.822589 | 5.79E-09 | 3.62E-07 |
| MMP1      | 17108.41 | -1.83927392 | 0.315873 | -5.82282 | 5.79E-09 | 3.62E-07 |
| TRBV5-1   | 27.78871 | 1.466495727 | 0.251992 | 5.819601 | 5.90E-09 | 3.66E-07 |
| PRKCB     | 636.5037 | 1.339879351 | 0.230538 | 5.811963 | 6.17E-09 | 3.79E-07 |
| A2ML1     | 736.7199 | -2.40144113 | 0.413485 | -5.8078  | 6.33E-09 | 3.88E-07 |
| VGLL1     | 359.0697 | -1.48225666 | 0.255327 | -5.80532 | 6.42E-09 | 3.91E-07 |
| CPB1      | 230347.6 | 3.334704561 | 0.575499 | 5.794453 | 6.85E-09 | 4.14E-07 |
| ADRA1B    | 53.64775 | -1.2958775  | 0.223985 | -5.78556 | 7.23E-09 | 4.33E-07 |
| C1QTNF4   | 24.87529 | 1.167563057 | 0.201811 | 5.785438 | 7.23E-09 | 4.33E-07 |
| C1QTNF4.1 | 24.87529 | 1.167563057 | 0.201811 | 5.785438 | 7.23E-09 | 4.33E-07 |
| CMTM5     | 12.37083 | 1.381398694 | 0.238826 | 5.784122 | 7.29E-09 | 4.34E-07 |
| CD247     | 335.8421 | 1.04957557  | 0.181544 | 5.781382 | 7.41E-09 | 4.39E-07 |
| CD3D      | 352.8689 | 1.127215406 | 0.195333 | 5.770731 | 7.89E-09 | 4.62E-07 |
| AOX1      | 895.1847 | 1.304563592 | 0.226067 | 5.770693 | 7.89E-09 | 4.62E-07 |
| CHI3L2    | 187.4441 | 1.20491079  | 0.208857 | 5.769066 | 7.97E-09 | 4.65E-07 |
| NPPC      | 14.65481 | 1.921968626 | 0.333168 | 5.768764 | 7.99E-09 | 4.65E-07 |
| ART3      | 59.41658 | 1.804051817 | 0.312747 | 5.768398 | 8.00E-09 | 4.66E-07 |
| FCRL1     | 124.4184 | 2.317318775 | 0.402324 | 5.759839 | 8.42E-09 | 4.85E-07 |
| SIT1      | 148.5577 | 1.304776257 | 0.226655 | 5.756651 | 8.58E-09 | 4.92E-07 |
| CSF3      | 40.52806 | 2.149205279 | 0.373332 | 5.756819 | 8.57E-09 | 4.92E-07 |
| CBFA2T3   | 407.0736 | 1.023494635 | 0.177864 | 5.754374 | 8.70E-09 | 4.97E-07 |
| ANK2      | 789.8743 | 1.124208338 | 0.195425 | 5.752632 | 8.79E-09 | 5.00E-07 |
| C14orf18C | 16.33632 | 2.129919183 | 0.370524 | 5.748403 | 9.01E-09 | 5.11E-07 |
| C14orf18D | 16.33632 | 2.129919183 | 0.370524 | 5.748403 | 9.01E-09 | 5.11E-07 |
| SPACA3    | 15.98277 | 1.881141415 | 0.32741  | 5.74552  | 9.16E-09 | 5.17E-07 |
| PLIN4     | 1110.332 | 1.819410752 | 0.316881 | 5.741616 | 9.38E-09 | 5.28E-07 |
| SLC5A10   | 19.84768 | 1.034325804 | 0.180559 | 5.728468 | 1.01E-08 | 5.63E-07 |
| PRSS3P1   | 174.6921 | 3.111762555 | 0.543306 | 5.727457 | 1.02E-08 | 5.66E-07 |
| FGF23     | 2.58125  | -2.91595915 | 0.509405 | -5.72424 | 1.04E-08 | 5.74E-07 |
| MEDAG     | 1164.492 | 1.34606549  | 0.235318 | 5.720191 | 1.06E-08 | 5.86E-07 |
| STMN4     | 18.99564 | 1.689439051 | 0.295717 | 5.713034 | 1.11E-08 | 6.06E-07 |
| CXCL12    | 3510.776 | 1.121349245 | 0.19647  | 5.707476 | 1.15E-08 | 6.19E-07 |
| SORCS1    | 116.4834 | 1.277151301 | 0.223739 | 5.708211 | 1.14E-08 | 6.19E-07 |
| PCSK1N    | 1710.484 | 1.576253073 | 0.276309 | 5.704676 | 1.17E-08 | 6.28E-07 |
| P2RY8     | 483.6953 | 1.044205847 | 0.183145 | 5.701527 | 1.19E-08 | 6.38E-07 |
| CACNA1I   | 65.22494 | 1.278561593 | 0.224847 | 5.686352 | 1.30E-08 | 6.86E-07 |
| CTRB2     | 71196.91 | 2.942117297 | 0.518069 | 5.679012 | 1.35E-08 | 7.10E-07 |
| CTRB2.1   | 71196.91 | 2.942117297 | 0.518069 | 5.679012 | 1.35E-08 | 7.10E-07 |
| IDO1      | 674.0146 | -1.5270488  | 0.269066 | -5.67537 | 1.38E-08 | 7.23E-07 |
| TRBV29-1  | 27.10831 | 1.416198956 | 0.249578 | 5.674381 | 1.39E-08 | 7.25E-07 |
| IL1RAPL2  | 22.92476 | -1.37103337 | 0.241798 | -5.67016 | 1.43E-08 | 7.39E-07 |
| RASGEF1C  | 13.8694  | 1.200415904 | 0.211832 | 5.666819 | 1.45E-08 | 7.50E-07 |
| TMEM72    | 38.29151 | 1.684974022 | 0.2974   | 5.665687 | 1.46E-08 | 7.54E-07 |
| PMP2      | 41.84194 | 1.769024745 | 0.312367 | 5.663298 | 1.48E-08 | 7.61E-07 |
| SP140     | 326.9969 | 1.158826335 | 0.204614 | 5.663476 | 1.48E-08 | 7.61E-07 |
| S100A1    | 198.8901 | 1.039715985 | 0.183623 | 5.662241 | 1.49E-08 | 7.64E-07 |
| DNASE1L3  | 75.81305 | 1.438775179 | 0.254127 | 5.66163  | 1.50E-08 | 7.65E-07 |
| ADAMTS8   | 320.3812 | 1.345692107 | 0.237831 | 5.658185 | 1.53E-08 | 7.77E-07 |

|           |          |             |          |          |          |          |
|-----------|----------|-------------|----------|----------|----------|----------|
| ZNF80     | 11.06844 | 1.536477339 | 0.271785 | 5.653287 | 1.57E-08 | 7.95E-07 |
| IGHV5-78  | 23.62483 | 1.426806661 | 0.252391 | 5.65315  | 1.58E-08 | 7.95E-07 |
| KLHL14    | 36.9958  | 1.717045119 | 0.303852 | 5.650935 | 1.60E-08 | 8.02E-07 |
| PCAT29    | 5.957453 | 1.395755081 | 0.247203 | 5.646182 | 1.64E-08 | 8.19E-07 |
| HPD       | 54.40579 | 1.233170715 | 0.218459 | 5.644856 | 1.65E-08 | 8.22E-07 |
| LRRC74A   | 5.525501 | 1.063131033 | 0.188349 | 5.644486 | 1.66E-08 | 8.22E-07 |
| CADM3     | 227.0058 | 1.351780277 | 0.239553 | 5.642925 | 1.67E-08 | 8.29E-07 |
| GZMK      | 232.9937 | 1.293128221 | 0.22933  | 5.638727 | 1.71E-08 | 8.41E-07 |
| HPN       | 1231.74  | 1.567059552 | 0.277955 | 5.637811 | 1.72E-08 | 8.43E-07 |
| HES6      | 458.4419 | 1.022615538 | 0.181414 | 5.636907 | 1.73E-08 | 8.47E-07 |
| C10orf82  | 5.005658 | 1.523866798 | 0.27035  | 5.63665  | 1.73E-08 | 8.47E-07 |
| ECHDC3    | 306.3871 | 1.020341818 | 0.181163 | 5.632166 | 1.78E-08 | 8.66E-07 |
| MEP1A     | 65.13778 | 2.009824673 | 0.357175 | 5.627005 | 1.83E-08 | 8.87E-07 |
| PAIP2B    | 393.424  | 1.17386368  | 0.208806 | 5.621797 | 1.89E-08 | 9.09E-07 |
| TLR10     | 140.314  | 1.536977024 | 0.273488 | 5.619917 | 1.91E-08 | 9.16E-07 |
| GPR18     | 49.24977 | 1.343929155 | 0.239538 | 5.610505 | 2.02E-08 | 9.55E-07 |
| ITK       | 418.9997 | 1.320985771 | 0.235551 | 5.608062 | 2.05E-08 | 9.65E-07 |
| MAG       | 7.416022 | 1.872123336 | 0.334029 | 5.604674 | 2.09E-08 | 9.81E-07 |
| NPAS4     | 10.02192 | 1.197389883 | 0.213864 | 5.598825 | 2.16E-08 | 1.01E-06 |
| ASB2      | 215.3605 | 1.227651286 | 0.219298 | 5.598096 | 2.17E-08 | 1.01E-06 |
| ASB2.1    | 215.3605 | 1.227651286 | 0.219298 | 5.598096 | 2.17E-08 | 1.01E-06 |
| ITM2A     | 924.3877 | 1.009966584 | 0.180531 | 5.594431 | 2.21E-08 | 1.03E-06 |
| PGM5P4-AS | 3.901886 | 1.430266078 | 0.255813 | 5.591067 | 2.26E-08 | 1.04E-06 |
| PPP1R16B  | 737.9885 | 1.009557012 | 0.180621 | 5.589374 | 2.28E-08 | 1.05E-06 |
| FCRL3     | 199.4947 | 1.636674831 | 0.292919 | 5.587474 | 2.30E-08 | 1.06E-06 |
| FAM180B   | 11.84844 | 1.524978186 | 0.273224 | 5.581415 | 2.39E-08 | 1.08E-06 |
| FAM180B.1 | 11.84844 | 1.524978186 | 0.273224 | 5.581415 | 2.39E-08 | 1.08E-06 |
| TRBV20-1  | 39.59894 | 1.257843784 | 0.225574 | 5.576187 | 2.46E-08 | 1.11E-06 |
| LY86-AS1  | 6.234562 | 1.681152852 | 0.302416 | 5.559066 | 2.71E-08 | 1.21E-06 |
| ABCC11    | 23.1506  | -1.04002993 | 0.187154 | -5.55707 | 2.74E-08 | 1.22E-06 |
| NCF1B     | 67.79682 | 1.164448317 | 0.209561 | 5.556599 | 2.75E-08 | 1.22E-06 |
| SLC12A1   | 5.375824 | 1.34471895  | 0.242022 | 5.55618  | 2.76E-08 | 1.22E-06 |
| IGLV1-36  | 121.6751 | 1.917197686 | 0.345056 | 5.556188 | 2.76E-08 | 1.22E-06 |
| TCEAL2    | 146.638  | 1.363858838 | 0.245512 | 5.555164 | 2.77E-08 | 1.23E-06 |
| PM20D1    | 104.9389 | 1.747422317 | 0.314672 | 5.553148 | 2.81E-08 | 1.24E-06 |
| FBXW12    | 17.59171 | 1.527286944 | 0.275793 | 5.537793 | 3.06E-08 | 1.33E-06 |
| CIDEA     | 42.63636 | 2.959556126 | 0.535294 | 5.528838 | 3.22E-08 | 1.38E-06 |
| FABP4     | 874.9102 | 1.844063898 | 0.333636 | 5.52718  | 3.25E-08 | 1.39E-06 |
| KLK2      | 49.38875 | 2.659892191 | 0.481526 | 5.523883 | 3.32E-08 | 1.41E-06 |
| ZNF114    | 34.9628  | -1.14790742 | 0.207982 | -5.51927 | 3.40E-08 | 1.45E-06 |
| DPT       | 1452.465 | 1.202740093 | 0.218134 | 5.513763 | 3.51E-08 | 1.48E-06 |
| MUC2      | 639.0718 | 2.455130349 | 0.445382 | 5.51242  | 3.54E-08 | 1.49E-06 |
| MUC2.1    | 639.0718 | 2.455130349 | 0.445382 | 5.51242  | 3.54E-08 | 1.49E-06 |
| MUC2.2    | 639.0718 | 2.455130349 | 0.445382 | 5.51242  | 3.54E-08 | 1.49E-06 |
| SPINK1    | 41977.14 | 1.620640144 | 0.29441  | 5.504702 | 3.70E-08 | 1.54E-06 |
| IGLV3-9   | 262.9362 | 1.821456359 | 0.332326 | 5.48093  | 4.23E-08 | 1.74E-06 |
| MMRN1     | 638.635  | 1.231527075 | 0.224862 | 5.476822 | 4.33E-08 | 1.77E-06 |
| ZNF556    | 14.24363 | 1.851142412 | 0.338353 | 5.471033 | 4.47E-08 | 1.82E-06 |
| TESPA1    | 187.9147 | 1.102297876 | 0.201524 | 5.469817 | 4.51E-08 | 1.83E-06 |
| CASQ2     | 70.97347 | 1.354446227 | 0.248292 | 5.455064 | 4.90E-08 | 1.96E-06 |
| HADHAP1   | 3.649553 | 1.1609444   | 0.213065 | 5.448769 | 5.07E-08 | 2.01E-06 |
| IGFN1     | 132.55   | 1.321897867 | 0.242701 | 5.446602 | 5.13E-08 | 2.02E-06 |
| ARX       | 137.4958 | 1.497664681 | 0.275165 | 5.442781 | 5.25E-08 | 2.07E-06 |
| BHLHA15   | 162.66   | 1.814801787 | 0.333592 | 5.440188 | 5.32E-08 | 2.09E-06 |

|           |          |             |          |          |          |          |
|-----------|----------|-------------|----------|----------|----------|----------|
| SLC5A8    | 5.492578 | 1.929449119 | 0.355032 | 5.434581 | 5.49E-08 | 2.14E-06 |
| SLC5A8.1  | 5.492578 | 1.929449119 | 0.355032 | 5.434581 | 5.49E-08 | 2.14E-06 |
| SLC7A10   | 12.77239 | 2.427839253 | 0.446761 | 5.434311 | 5.50E-08 | 2.14E-06 |
| NCF1      | 195.9917 | 1.02875362  | 0.18945  | 5.430222 | 5.63E-08 | 2.18E-06 |
| RCS1D1    | 995.0335 | 1.008553992 | 0.185861 | 5.426399 | 5.75E-08 | 2.22E-06 |
| HTR1D     | 318.5697 | -1.04295164 | 0.192206 | -5.42622 | 5.76E-08 | 2.22E-06 |
| RBFOX3    | 30.08641 | 1.217985938 | 0.22467  | 5.421216 | 5.92E-08 | 2.28E-06 |
| IKZF3     | 874.1129 | 1.14483246  | 0.21124  | 5.419588 | 5.97E-08 | 2.30E-06 |
| KCNH6     | 118.5384 | 1.613695617 | 0.297863 | 5.417571 | 6.04E-08 | 2.32E-06 |
| ADAMTS9-1 | 62.81203 | 1.091819474 | 0.20154  | 5.417375 | 6.05E-08 | 2.32E-06 |
| GNMT      | 140.7901 | 1.674801451 | 0.309212 | 5.416345 | 6.08E-08 | 2.33E-06 |
| LILRA4    | 54.15693 | 1.357812751 | 0.250773 | 5.414509 | 6.15E-08 | 2.35E-06 |
| LILRA4.1  | 54.15693 | 1.357812751 | 0.250773 | 5.414509 | 6.15E-08 | 2.35E-06 |
| LILRA4.2  | 54.15693 | 1.357812751 | 0.250773 | 5.414509 | 6.15E-08 | 2.35E-06 |
| LILRA4.3  | 54.15693 | 1.357812751 | 0.250773 | 5.414509 | 6.15E-08 | 2.35E-06 |
| CRIP3     | 40.1003  | 1.028425692 | 0.190165 | 5.408075 | 6.37E-08 | 2.42E-06 |
| REG1A     | 130197.5 | 2.316295569 | 0.428632 | 5.40392  | 6.52E-08 | 2.46E-06 |
| C1QTNF9   | 6.468769 | 1.151082876 | 0.213075 | 5.40223  | 6.58E-08 | 2.48E-06 |
| CD28      | 192.095  | 1.135434768 | 0.210482 | 5.394445 | 6.87E-08 | 2.57E-06 |
| OXT       | 7.920823 | 1.313952103 | 0.243641 | 5.392978 | 6.93E-08 | 2.59E-06 |
| LPL       | 893.1848 | 1.012502836 | 0.188071 | 5.383621 | 7.30E-08 | 2.71E-06 |
| LMO3      | 274.7834 | 1.038822627 | 0.193127 | 5.378963 | 7.49E-08 | 2.77E-06 |
| ACER2     | 225.9678 | -1.07989622 | 0.201003 | -5.37255 | 7.76E-08 | 2.85E-06 |
| COL19A1   | 19.84462 | 1.937298368 | 0.360918 | 5.367704 | 7.97E-08 | 2.90E-06 |
| CTSG      | 99.6544  | 1.436171494 | 0.267748 | 5.363886 | 8.15E-08 | 2.95E-06 |
| PYHIN1    | 99.62563 | 1.14964232  | 0.214464 | 5.360544 | 8.30E-08 | 3.01E-06 |
| ANGPTL1   | 399.9854 | 1.130362277 | 0.210881 | 5.360193 | 8.31E-08 | 3.01E-06 |
| SLC6A4    | 76.66855 | 1.323542084 | 0.2471   | 5.3563   | 8.49E-08 | 3.06E-06 |
| CD3E      | 929.8032 | 1.05850718  | 0.197768 | 5.35228  | 8.69E-08 | 3.12E-06 |
| CHRDL2    | 424.1197 | 1.569084011 | 0.293236 | 5.350918 | 8.75E-08 | 3.13E-06 |
| PCDH19    | 60.9388  | 1.002524182 | 0.187425 | 5.348939 | 8.85E-08 | 3.15E-06 |
| LINC00494 | 50.82973 | 1.560175785 | 0.291766 | 5.347358 | 8.92E-08 | 3.17E-06 |
| NTRK2     | 1421.893 | 1.100524041 | 0.205904 | 5.344837 | 9.05E-08 | 3.20E-06 |
| CCL14     | 75.64926 | 1.258295278 | 0.235625 | 5.340241 | 9.28E-08 | 3.28E-06 |
| CCL14.1   | 75.64926 | 1.258295278 | 0.235625 | 5.340241 | 9.28E-08 | 3.28E-06 |
| CHRDL1    | 1090.37  | 1.439265057 | 0.269802 | 5.334522 | 9.58E-08 | 3.37E-06 |
| ASTN1     | 59.91064 | 1.236571877 | 0.231828 | 5.334005 | 9.61E-08 | 3.37E-06 |
| ANKRD30B  | 3.016668 | 2.276318278 | 0.42677  | 5.333824 | 9.62E-08 | 3.37E-06 |
| ARHGEF26  | 14.52269 | 1.085335869 | 0.203742 | 5.327014 | 9.98E-08 | 3.48E-06 |
| ARHGEF26  | 14.52269 | 1.085335869 | 0.203742 | 5.327014 | 9.98E-08 | 3.48E-06 |
| BEND4     | 23.9374  | 1.670944679 | 0.313849 | 5.324048 | 1.01E-07 | 3.53E-06 |
| TRBV6-5   | 14.37814 | 1.180324672 | 0.221889 | 5.319438 | 1.04E-07 | 3.59E-06 |
| IL36RN    | 7.924788 | -2.18902627 | 0.411633 | -5.31791 | 1.05E-07 | 3.62E-06 |
| HS3ST2    | 231.2734 | 1.114250788 | 0.20961  | 5.315839 | 1.06E-07 | 3.64E-06 |
| APOC1     | 3498.191 | 1.011616741 | 0.190327 | 5.315139 | 1.07E-07 | 3.65E-06 |
| PPY       | 17763.92 | 2.482269416 | 0.46704  | 5.3149   | 1.07E-07 | 3.65E-06 |
| MEG9      | 38.7909  | 1.013643925 | 0.19087  | 5.310639 | 1.09E-07 | 3.73E-06 |
| TMEM40    | 107.9479 | -1.62595917 | 0.306162 | -5.31079 | 1.09E-07 | 3.73E-06 |
| GFRA1     | 617.8726 | 1.13097125  | 0.213051 | 5.308454 | 1.11E-07 | 3.76E-06 |
| ACSM6     | 3.871446 | 1.466347759 | 0.276414 | 5.304898 | 1.13E-07 | 3.80E-06 |
| ITIH4     | 74.62547 | 1.231563835 | 0.232184 | 5.304267 | 1.13E-07 | 3.81E-06 |
| CD5       | 421.5984 | 1.01498751  | 0.191835 | 5.290927 | 1.22E-07 | 4.05E-06 |
| RUNDC3A   | 266.9221 | 1.18593381  | 0.224407 | 5.284742 | 1.26E-07 | 4.16E-06 |
| TRBV25-1  | 26.16863 | 1.155820801 | 0.218819 | 5.282092 | 1.28E-07 | 4.22E-06 |

|           |          |             |          |          |          |          |
|-----------|----------|-------------|----------|----------|----------|----------|
| CXCR5     | 23.30806 | 1.921282774 | 0.363811 | 5.28099  | 1.28E-07 | 4.23E-06 |
| PCDHGB2   | 243.6906 | -1.22829418 | 0.232729 | -5.27779 | 1.31E-07 | 4.30E-06 |
| CUX2      | 12.52405 | 1.153730594 | 0.218899 | 5.270604 | 1.36E-07 | 4.44E-06 |
| SPAG6     | 21.15168 | 1.505574306 | 0.28611  | 5.262219 | 1.42E-07 | 4.61E-06 |
| MYLK2     | 90.75805 | 1.531256541 | 0.290982 | 5.262373 | 1.42E-07 | 4.61E-06 |
| ADH1B     | 1918.296 | 1.459427393 | 0.277442 | 5.260292 | 1.44E-07 | 4.65E-06 |
| LINC01529 | 4.678089 | 1.241536694 | 0.236117 | 5.258134 | 1.46E-07 | 4.69E-06 |
| CACNA2D2  | 500.6461 | 1.061991774 | 0.202296 | 5.249697 | 1.52E-07 | 4.86E-06 |
| FCN2      | 3.552602 | 1.777522444 | 0.338704 | 5.248005 | 1.54E-07 | 4.90E-06 |
| PRUNE2    | 997.5626 | 1.069756332 | 0.203848 | 5.247814 | 1.54E-07 | 4.90E-06 |
| FZD9      | 10.27467 | 1.005830787 | 0.191697 | 5.246992 | 1.55E-07 | 4.91E-06 |
| TMED11P   | 123.132  | 2.903397669 | 0.553439 | 5.246107 | 1.55E-07 | 4.93E-06 |
| APLP1     | 1286.619 | 1.011526693 | 0.192969 | 5.24191  | 1.59E-07 | 5.03E-06 |
| IKZF1     | 901.2725 | 1.068165736 | 0.203808 | 5.241045 | 1.60E-07 | 5.04E-06 |
| RASD1     | 1254.409 | 1.063820802 | 0.203399 | 5.230207 | 1.69E-07 | 5.29E-06 |
| MIR663AHC | 2.77482  | 1.436035009 | 0.274663 | 5.228358 | 1.71E-07 | 5.33E-06 |
| TNFSF8    | 157.942  | 1.128342664 | 0.215875 | 5.226832 | 1.72E-07 | 5.37E-06 |
| SH2D1A    | 136.9282 | 1.164669571 | 0.222926 | 5.224474 | 1.75E-07 | 5.42E-06 |
| GDF10     | 39.07966 | 1.19300033  | 0.228653 | 5.217516 | 1.81E-07 | 5.59E-06 |
| SLAMF1    | 179.3727 | 1.010425627 | 0.193751 | 5.215084 | 1.84E-07 | 5.65E-06 |
| AMHR2     | 27.88961 | 1.51407489  | 0.290602 | 5.21014  | 1.89E-07 | 5.76E-06 |
| PCDHGB1   | 61.32034 | -1.29658454 | 0.248875 | -5.20977 | 1.89E-07 | 5.77E-06 |
| FXD7      | 18.2913  | 1.160243643 | 0.222954 | 5.203949 | 1.95E-07 | 5.95E-06 |
| LTA       | 41.18422 | 1.160612343 | 0.223056 | 5.20324  | 1.96E-07 | 5.96E-06 |
| LTA.1     | 41.18422 | 1.160612343 | 0.223056 | 5.20324  | 1.96E-07 | 5.96E-06 |
| LTA.2     | 41.18422 | 1.160612343 | 0.223056 | 5.20324  | 1.96E-07 | 5.96E-06 |
| LTA.3     | 41.18422 | 1.160612343 | 0.223056 | 5.20324  | 1.96E-07 | 5.96E-06 |
| LTA.4     | 41.18422 | 1.160612343 | 0.223056 | 5.20324  | 1.96E-07 | 5.96E-06 |
| LTA.5     | 41.18422 | 1.160612343 | 0.223056 | 5.20324  | 1.96E-07 | 5.96E-06 |
| LTA.6     | 41.18422 | 1.160612343 | 0.223056 | 5.20324  | 1.96E-07 | 5.96E-06 |
| ARHGDI3   | 121.8727 | 1.505217267 | 0.289631 | 5.197014 | 2.03E-07 | 6.12E-06 |
| HEPACAM   | 5.523    | 1.766142596 | 0.339936 | 5.195518 | 2.04E-07 | 6.15E-06 |
| PNLIPRP1  | 9701.611 | 2.80664816  | 0.54046  | 5.193076 | 2.07E-07 | 6.21E-06 |
| UPK2      | 96.69461 | -1.85237065 | 0.356971 | -5.18913 | 2.11E-07 | 6.30E-06 |
| LCN10     | 18.80284 | 1.483587215 | 0.286155 | 5.184565 | 2.17E-07 | 6.44E-06 |
| SCARA5    | 331.4297 | 1.693856231 | 0.326821 | 5.182832 | 2.19E-07 | 6.48E-06 |
| VWA5B2    | 304.8002 | 1.406096855 | 0.271395 | 5.181003 | 2.21E-07 | 6.53E-06 |
| CACNA1A   | 327.544  | 1.010007572 | 0.195148 | 5.175586 | 2.27E-07 | 6.70E-06 |
| IGHG2     | 13144.34 | 1.467513685 | 0.283747 | 5.171909 | 2.32E-07 | 6.82E-06 |
| NPW       | 30.00147 | 1.454785544 | 0.281584 | 5.166435 | 2.39E-07 | 6.99E-06 |
| AKAP14    | 2.642851 | -1.62502206 | 0.314926 | -5.16002 | 2.47E-07 | 7.21E-06 |
| RHCG      | 103.1171 | -1.56138114 | 0.302781 | -5.15681 | 2.51E-07 | 7.31E-06 |
| ICAM5     | 90.41433 | -1.2038458  | 0.233534 | -5.15492 | 2.54E-07 | 7.37E-06 |
| PLP1      | 277.0776 | 1.371378363 | 0.266127 | 5.153095 | 2.56E-07 | 7.43E-06 |
| CCL21     | 2697.384 | 1.509237495 | 0.292939 | 5.152058 | 2.58E-07 | 7.46E-06 |
| TCEAL5    | 45.37716 | 1.056255624 | 0.205364 | 5.143327 | 2.70E-07 | 7.76E-06 |
| GP2       | 56819.14 | 2.76026215  | 0.536725 | 5.142787 | 2.71E-07 | 7.78E-06 |
| GPM6A     | 147.042  | 1.359571769 | 0.264427 | 5.141581 | 2.72E-07 | 7.81E-06 |
| TRBV7-4   | 2.632844 | 1.640136993 | 0.319002 | 5.141459 | 2.73E-07 | 7.81E-06 |
| PHF21B    | 25.08916 | 1.063398419 | 0.206845 | 5.141034 | 2.73E-07 | 7.81E-06 |
| SLC22A31  | 42.01369 | 1.513346029 | 0.294384 | 5.140722 | 2.74E-07 | 7.81E-06 |
| SYP       | 451.234  | 1.03084454  | 0.200575 | 5.139456 | 2.76E-07 | 7.85E-06 |
| NTF4      | 86.59715 | -1.37556218 | 0.267808 | -5.13638 | 2.80E-07 | 7.96E-06 |
| NAT8L     | 212.7513 | 1.114354624 | 0.217105 | 5.132794 | 2.85E-07 | 8.10E-06 |

|           |          |             |          |          |          |          |
|-----------|----------|-------------|----------|----------|----------|----------|
| SYT6      | 31.126   | 1.491197883 | 0.290634 | 5.130843 | 2.88E-07 | 8.18E-06 |
| GFAP      | 83.33217 | 1.272705882 | 0.248213 | 5.127479 | 2.94E-07 | 8.31E-06 |
| MRAP      | 5.654158 | 2.008303625 | 0.391743 | 5.126589 | 2.95E-07 | 8.33E-06 |
| CPA5      | 10.4555  | 1.331373852 | 0.259878 | 5.123074 | 3.01E-07 | 8.46E-06 |
| CPB2-AS1  | 4.364287 | 1.079403912 | 0.210738 | 5.12203  | 3.02E-07 | 8.50E-06 |
| ZDHHC19   | 8.959504 | 1.110440656 | 0.21686  | 5.12053  | 3.05E-07 | 8.55E-06 |
| PRR35     | 2.824334 | 2.28655775  | 0.446653 | 5.119314 | 3.07E-07 | 8.58E-06 |
| PDIA2     | 2558.507 | 2.015878392 | 0.393782 | 5.11927  | 3.07E-07 | 8.58E-06 |
| SLC8A3    | 33.04718 | 1.069869052 | 0.209061 | 5.117502 | 3.10E-07 | 8.65E-06 |
| CLCNKA    | 36.40439 | 1.198143208 | 0.234327 | 5.11312  | 3.17E-07 | 8.82E-06 |
| MT1G      | 1798.69  | 1.478692249 | 0.289339 | 5.110583 | 3.21E-07 | 8.91E-06 |
| TIGIT     | 284.7567 | 1.071993633 | 0.209796 | 5.109696 | 3.23E-07 | 8.94E-06 |
| FFAR3     | 7.064538 | 1.02169306  | 0.200007 | 5.108286 | 3.25E-07 | 9.00E-06 |
| COL6A4P1  | 7.022137 | -1.20999481 | 0.236865 | -5.10838 | 3.25E-07 | 9.00E-06 |
| CXCL2     | 714.3516 | 1.111030922 | 0.21752  | 5.107717 | 3.26E-07 | 9.02E-06 |
| PARP15    | 290.0606 | 1.091930703 | 0.213816 | 5.106875 | 3.28E-07 | 9.04E-06 |
| GLYATL2   | 20.03213 | 1.281111651 | 0.250906 | 5.105938 | 3.29E-07 | 9.08E-06 |
| FAM87A    | 14.65031 | 1.10016654  | 0.215858 | 5.09671  | 3.46E-07 | 9.44E-06 |
| MROH9     | 3.128949 | -1.87037094 | 0.36705  | -5.09569 | 3.47E-07 | 9.47E-06 |
| MADCAM1   | 189.6388 | 1.185538513 | 0.233017 | 5.087771 | 3.62E-07 | 9.80E-06 |
| TACR1     | 65.02274 | 1.117546891 | 0.219726 | 5.08609  | 3.66E-07 | 9.88E-06 |
| TDH       | 18.02796 | 1.54244808  | 0.303347 | 5.084773 | 3.68E-07 | 9.92E-06 |
| TDH.1     | 18.02796 | 1.54244808  | 0.303347 | 5.084773 | 3.68E-07 | 9.92E-06 |
| TRBV7-1   | 1.640105 | 2.115369774 | 0.416146 | 5.083236 | 3.71E-07 | 9.99E-06 |
| IGKV2D-29 | 157.1418 | 1.655973069 | 0.326007 | 5.079571 | 3.78E-07 | 1.01E-05 |
| HPCAL4    | 29.86988 | 1.246246974 | 0.245356 | 5.079339 | 3.79E-07 | 1.01E-05 |
| MYRIP     | 130.9059 | 1.017703456 | 0.200402 | 5.078299 | 3.81E-07 | 1.02E-05 |
| MUC16     | 4345.876 | -1.68009565 | 0.330907 | -5.07724 | 3.83E-07 | 1.02E-05 |
| UGT1A6    | 120.6136 | -1.39473516 | 0.274887 | -5.07385 | 3.90E-07 | 1.04E-05 |
| IGF1      | 199.6367 | 1.388702203 | 0.27398  | 5.068635 | 4.01E-07 | 1.06E-05 |
| SCEL      | 1386.022 | -1.19586129 | 0.236117 | -5.0647  | 4.09E-07 | 1.08E-05 |
| TNNT3     | 44.69268 | 1.292036161 | 0.255123 | 5.064372 | 4.10E-07 | 1.08E-05 |
| TNNT3.1   | 44.69268 | 1.292036161 | 0.255123 | 5.064372 | 4.10E-07 | 1.08E-05 |
| KEL       | 39.06252 | 1.130706868 | 0.223377 | 5.061866 | 4.15E-07 | 1.09E-05 |
| KEL.1     | 39.06252 | 1.130706868 | 0.223377 | 5.061866 | 4.15E-07 | 1.09E-05 |
| LCN6      | 17.62712 | 1.325558956 | 0.261882 | 5.061659 | 4.16E-07 | 1.09E-05 |
| C1QL1     | 141.6283 | 1.151155063 | 0.227414 | 5.061941 | 4.15E-07 | 1.09E-05 |
| ICAM3     | 122.4112 | 1.05385286  | 0.208204 | 5.061642 | 4.16E-07 | 1.09E-05 |
| MIR4539   | 3.46105  | 2.25240497  | 0.445543 | 5.055413 | 4.29E-07 | 1.12E-05 |
| CCR4      | 182.1929 | 1.16331495  | 0.230264 | 5.052092 | 4.37E-07 | 1.14E-05 |
| ABCA8     | 691.8335 | 1.055721322 | 0.208967 | 5.05209  | 4.37E-07 | 1.14E-05 |
| PTF1A     | 113.3786 | 2.862208052 | 0.566833 | 5.049469 | 4.43E-07 | 1.15E-05 |
| AMYP1     | 8.3157   | 4.137554401 | 0.819619 | 5.048146 | 4.46E-07 | 1.16E-05 |
| CHL1      | 348.0784 | 1.046662004 | 0.207376 | 5.047162 | 4.48E-07 | 1.16E-05 |
| CACNG4    | 701.4557 | -1.37855608 | 0.273469 | -5.04099 | 4.63E-07 | 1.19E-05 |
| TNMD      | 10.83097 | 2.198392282 | 0.436388 | 5.037699 | 4.71E-07 | 1.21E-05 |
| KCNA1     | 10.89833 | 1.421112782 | 0.282525 | 5.030035 | 4.90E-07 | 1.25E-05 |
| FAM163A   | 48.83769 | 1.18400888  | 0.235502 | 5.027586 | 4.97E-07 | 1.26E-05 |
| FAM163A.1 | 48.83769 | 1.18400888  | 0.235502 | 5.027586 | 4.97E-07 | 1.26E-05 |
| TRBV6-4   | 1.575581 | 1.665538902 | 0.331672 | 5.021641 | 5.12E-07 | 1.29E-05 |
| TRAV4     | 10.09574 | 1.066649328 | 0.21248  | 5.020007 | 5.17E-07 | 1.30E-05 |
| SHISA7    | 9.749762 | 1.196561567 | 0.238508 | 5.016865 | 5.25E-07 | 1.32E-05 |
| C16orf89  | 288.3332 | 1.145209261 | 0.228412 | 5.01378  | 5.34E-07 | 1.34E-05 |
| FEV       | 79.97066 | 1.43626911  | 0.286456 | 5.013922 | 5.33E-07 | 1.34E-05 |



|           |          |             |          |          |          |          |
|-----------|----------|-------------|----------|----------|----------|----------|
| GDAP1L1   | 28.80574 | 1.181360585 | 0.235678 | 5.012598 | 5.37E-07 | 1.34E-05 |
| WDFY4     | 861.6565 | 1.023421702 | 0.204276 | 5.010002 | 5.44E-07 | 1.36E-05 |
| DPEP1     | 1698.211 | 1.127307895 | 0.225159 | 5.00671  | 5.54E-07 | 1.37E-05 |
| NROB1     | 54.16716 | 1.588085158 | 0.317193 | 5.006692 | 5.54E-07 | 1.37E-05 |
| KLK3      | 144.9071 | 2.871844692 | 0.574365 | 5.000039 | 5.73E-07 | 1.41E-05 |
| BTBD17    | 11.46663 | 1.419437083 | 0.283996 | 4.998096 | 5.79E-07 | 1.42E-05 |
| CBLN1     | 66.13963 | 1.100412993 | 0.220297 | 4.995123 | 5.88E-07 | 1.44E-05 |
| ANKRD55   | 23.94751 | 1.173639046 | 0.235234 | 4.989239 | 6.06E-07 | 1.48E-05 |
| AGTR2     | 7.988903 | 2.207187872 | 0.442558 | 4.987344 | 6.12E-07 | 1.49E-05 |
| GJC3      | 24.94892 | 1.019513329 | 0.204635 | 4.982099 | 6.29E-07 | 1.52E-05 |
| P2RY10    | 97.18434 | 1.215191958 | 0.243972 | 4.980865 | 6.33E-07 | 1.53E-05 |
| DUSP26    | 198.8926 | 1.141763624 | 0.229286 | 4.97965  | 6.37E-07 | 1.54E-05 |
| MIR8071-2 | 13.85253 | 2.085974328 | 0.419048 | 4.977887 | 6.43E-07 | 1.55E-05 |
| HSF5      | 5.773326 | 1.348597387 | 0.271045 | 4.97555  | 6.51E-07 | 1.56E-05 |
| FBXL16    | 260.9495 | 1.006127183 | 0.202623 | 4.965524 | 6.85E-07 | 1.63E-05 |
| TRBV19    | 28.79702 | 1.246918434 | 0.251125 | 4.965324 | 6.86E-07 | 1.63E-05 |
| SNAP25    | 473.9972 | 1.079973554 | 0.217611 | 4.962855 | 6.95E-07 | 1.64E-05 |
| ACTL8     | 5.401062 | 2.478113061 | 0.499398 | 4.962201 | 6.97E-07 | 1.65E-05 |
| MS4A1     | 764.9415 | 1.992515154 | 0.401834 | 4.958555 | 7.10E-07 | 1.67E-05 |
| PLIN5     | 205.775  | 1.143159836 | 0.230658 | 4.956074 | 7.19E-07 | 1.69E-05 |
| KCNJ5     | 428.0671 | 1.223643026 | 0.247026 | 4.953492 | 7.29E-07 | 1.71E-05 |
| TRAV8-6   | 10.9771  | 1.136364561 | 0.229401 | 4.953626 | 7.28E-07 | 1.71E-05 |
| GRIA2     | 77.83393 | 1.39594539  | 0.281947 | 4.951094 | 7.38E-07 | 1.72E-05 |
| CYP2B6    | 146.4536 | -1.56887742 | 0.317073 | -4.948   | 7.50E-07 | 1.75E-05 |
| FTCD      | 48.31555 | 1.181501448 | 0.238846 | 4.946716 | 7.55E-07 | 1.75E-05 |
| FTCD.1    | 48.31555 | 1.181501448 | 0.238846 | 4.946716 | 7.55E-07 | 1.75E-05 |
| TUBB4A    | 74.03217 | 1.141760396 | 0.231079 | 4.941006 | 7.77E-07 | 1.80E-05 |
| IRF4      | 253.0715 | 1.124462163 | 0.227644 | 4.939574 | 7.83E-07 | 1.80E-05 |
| WNT9B     | 9.019508 | 1.012864155 | 0.205233 | 4.93519  | 8.01E-07 | 1.84E-05 |
| WNT9B.1   | 9.019508 | 1.012864155 | 0.205233 | 4.93519  | 8.01E-07 | 1.84E-05 |
| SFRP1     | 1128.122 | 1.278029972 | 0.259013 | 4.934233 | 8.05E-07 | 1.84E-05 |
| GRIA1     | 10.74801 | 1.238441373 | 0.251054 | 4.932959 | 8.10E-07 | 1.85E-05 |
| C12orf42  | 11.38617 | 1.760073838 | 0.357764 | 4.919649 | 8.67E-07 | 1.96E-05 |
| OPRD1     | 40.79143 | 1.088280649 | 0.221275 | 4.918217 | 8.73E-07 | 1.97E-05 |
| LBP       | 130.6592 | 1.727579665 | 0.351416 | 4.916046 | 8.83E-07 | 1.99E-05 |
| RNU6-1022 | 3.429542 | 2.975015257 | 0.605378 | 4.914314 | 8.91E-07 | 2.00E-05 |
| TRBV21-1  | 2.219379 | 1.666983837 | 0.3401   | 4.901447 | 9.51E-07 | 2.12E-05 |
| PPP2R2C   | 661.1444 | -1.2112676  | 0.247528 | -4.89345 | 9.91E-07 | 2.20E-05 |
| ATCAY     | 48.25763 | 1.191159602 | 0.243503 | 4.891773 | 9.99E-07 | 2.22E-05 |
| SLC8A2    | 170.4713 | 1.291379465 | 0.264165 | 4.888532 | 1.02E-06 | 2.25E-05 |
| SCGB1D2   | 6.05894  | 2.08818019  | 0.427392 | 4.88587  | 1.03E-06 | 2.28E-05 |
| UGT1A1    | 52.91623 | -1.69431944 | 0.346813 | -4.88539 | 1.03E-06 | 2.28E-05 |
| SLC12A3   | 13.98533 | 1.037544561 | 0.212641 | 4.879328 | 1.06E-06 | 2.34E-05 |
| AMY1B     | 5.925021 | 3.110187985 | 0.637575 | 4.878152 | 1.07E-06 | 2.35E-05 |
| KCNA3     | 49.98521 | 1.092487166 | 0.224313 | 4.870366 | 1.11E-06 | 2.43E-05 |
| ABCD2     | 43.8512  | 1.08292617  | 0.222408 | 4.869096 | 1.12E-06 | 2.45E-05 |
| ZDHHC22   | 10.70645 | 1.351686044 | 0.27774  | 4.866729 | 1.13E-06 | 2.47E-05 |
| RAB3C     | 325.2875 | 1.127362134 | 0.231774 | 4.864063 | 1.15E-06 | 2.49E-05 |
| KRT73     | 2.558732 | 2.119051233 | 0.435952 | 4.860746 | 1.17E-06 | 2.52E-05 |
| TRBV15    | 4.90584  | 1.465700886 | 0.301759 | 4.857187 | 1.19E-06 | 2.56E-05 |
| GPR87     | 492.223  | -1.37077856 | 0.282412 | -4.85382 | 1.21E-06 | 2.59E-05 |
| MZB1      | 684.2078 | 1.101519018 | 0.227064 | 4.851142 | 1.23E-06 | 2.62E-05 |
| POU2AF1   | 725.935  | 1.234771709 | 0.254529 | 4.851211 | 1.23E-06 | 2.62E-05 |
| SPINK2    | 10.86262 | 1.141144402 | 0.235621 | 4.843127 | 1.28E-06 | 2.70E-05 |

|           |          |             |          |          |          |          |
|-----------|----------|-------------|----------|----------|----------|----------|
| EPO       | 11.00277 | 1.539349071 | 0.317906 | 4.842146 | 1.28E-06 | 2.71E-05 |
| DMRT3     | 4.330019 | 1.432117452 | 0.29577  | 4.841999 | 1.29E-06 | 2.71E-05 |
| PTGS2     | 2073.41  | -1.17194045 | 0.242049 | -4.84174 | 1.29E-06 | 2.71E-05 |
| PCDH8     | 12.47744 | 1.334783179 | 0.275727 | 4.840965 | 1.29E-06 | 2.72E-05 |
| PWRN1     | 5.203302 | 1.357410592 | 0.28073  | 4.835283 | 1.33E-06 | 2.78E-05 |
| CBLN4     | 85.24674 | 1.22098034  | 0.252894 | 4.828035 | 1.38E-06 | 2.86E-05 |
| POU3F2    | 3.914481 | 1.345447998 | 0.279066 | 4.821261 | 1.43E-06 | 2.94E-05 |
| LINC00565 | 1.482791 | 1.716660146 | 0.356114 | 4.820532 | 1.43E-06 | 2.94E-05 |
| RNA5SP18  | 5.765417 | -1.17268868 | 0.24349  | -4.81617 | 1.46E-06 | 3.00E-05 |
| BFSP2     | 8.206288 | 1.232106019 | 0.255965 | 4.813568 | 1.48E-06 | 3.03E-05 |
| TMPRSS15  | 41.79418 | 2.560603386 | 0.532388 | 4.809659 | 1.51E-06 | 3.08E-05 |
| ITLN1     | 408.587  | 2.14779733  | 0.446596 | 4.809267 | 1.51E-06 | 3.08E-05 |
| GATM      | 9965.794 | 1.152315678 | 0.239668 | 4.807975 | 1.52E-06 | 3.10E-05 |
| APOA4     | 72.60614 | 2.657665913 | 0.552906 | 4.806719 | 1.53E-06 | 3.11E-05 |
| PVALB     | 13.05678 | 1.116125366 | 0.232312 | 4.804418 | 1.55E-06 | 3.14E-05 |
| PVALB.1   | 13.05678 | 1.116125366 | 0.232312 | 4.804418 | 1.55E-06 | 3.14E-05 |
| LINC00475 | 28.9883  | 1.353492334 | 0.281992 | 4.799761 | 1.59E-06 | 3.19E-05 |
| SMYD1     | 4.990473 | 2.399271714 | 0.500436 | 4.794359 | 1.63E-06 | 3.27E-05 |
| P3H2-AS1  | 7.414067 | -1.45138233 | 0.302977 | -4.7904  | 1.66E-06 | 3.32E-05 |
| FDCSP     | 821.7859 | 1.747592144 | 0.364885 | 4.789439 | 1.67E-06 | 3.33E-05 |
| PNOC      | 78.99304 | 1.090747712 | 0.22777  | 4.788814 | 1.68E-06 | 3.34E-05 |
| MAPK4     | 103.1837 | 1.135766134 | 0.237245 | 4.787307 | 1.69E-06 | 3.36E-05 |
| MAPK4.1   | 103.1837 | 1.135766134 | 0.237245 | 4.787307 | 1.69E-06 | 3.36E-05 |
| TRAT1     | 64.11864 | 1.137291739 | 0.237715 | 4.784269 | 1.72E-06 | 3.39E-05 |
| DEFB124   | 3.843974 | 1.067698165 | 0.223178 | 4.78406  | 1.72E-06 | 3.39E-05 |
| MAL       | 87.25977 | 1.16673263  | 0.243966 | 4.782348 | 1.73E-06 | 3.42E-05 |
| CACNA1B   | 54.83295 | 1.246880597 | 0.260803 | 4.780923 | 1.74E-06 | 3.44E-05 |
| SCRG1     | 166.1994 | 1.086470657 | 0.227371 | 4.778396 | 1.77E-06 | 3.47E-05 |
| MIR126    | 4.156843 | 1.110837523 | 0.232487 | 4.778064 | 1.77E-06 | 3.47E-05 |
| DPYS      | 16.66354 | 1.113445574 | 0.233464 | 4.769238 | 1.85E-06 | 3.60E-05 |
| NKX2-2    | 312.517  | 1.515333597 | 0.317719 | 4.76942  | 1.85E-06 | 3.60E-05 |
| CNTNAP4   | 5.024487 | 1.533154362 | 0.321692 | 4.765912 | 1.88E-06 | 3.65E-05 |
| GPR171    | 120.8049 | 1.027320842 | 0.215847 | 4.759491 | 1.94E-06 | 3.75E-05 |
| TRBV5-6   | 8.981058 | 1.319470382 | 0.277676 | 4.751826 | 2.02E-06 | 3.87E-05 |
| REG3G     | 6450.739 | 2.615094881 | 0.550529 | 4.750146 | 2.03E-06 | 3.90E-05 |
| DSCR8     | 1.312458 | 2.355909565 | 0.496097 | 4.748886 | 2.05E-06 | 3.92E-05 |
| HEMGN     | 3.019441 | 1.540639646 | 0.324718 | 4.744543 | 2.09E-06 | 3.99E-05 |
| TTC24     | 12.69438 | 1.348501141 | 0.284338 | 4.742604 | 2.11E-06 | 4.03E-05 |
| LINC00316 | 2.856912 | 1.473213561 | 0.310647 | 4.742397 | 2.11E-06 | 4.03E-05 |
| KCTD4     | 4.207163 | 1.517585596 | 0.320105 | 4.740893 | 2.13E-06 | 4.05E-05 |
| DSCAM     | 32.12562 | 1.207570005 | 0.254732 | 4.740546 | 2.13E-06 | 4.06E-05 |
| IL13      | 2.711337 | 1.449025789 | 0.305742 | 4.73937  | 2.14E-06 | 4.07E-05 |
| LTB       | 1128.315 | 1.056009638 | 0.223109 | 4.733164 | 2.21E-06 | 4.18E-05 |
| LTB.1     | 1128.315 | 1.056009638 | 0.223109 | 4.733164 | 2.21E-06 | 4.18E-05 |
| LTB.2     | 1128.315 | 1.056009638 | 0.223109 | 4.733164 | 2.21E-06 | 4.18E-05 |
| LTB.3     | 1128.315 | 1.056009638 | 0.223109 | 4.733164 | 2.21E-06 | 4.18E-05 |
| LTB.4     | 1128.315 | 1.056009638 | 0.223109 | 4.733164 | 2.21E-06 | 4.18E-05 |
| LTB.5     | 1128.315 | 1.056009638 | 0.223109 | 4.733164 | 2.21E-06 | 4.18E-05 |
| LTB.6     | 1128.315 | 1.056009638 | 0.223109 | 4.733164 | 2.21E-06 | 4.18E-05 |
| LTB.7     | 1128.315 | 1.056009638 | 0.223109 | 4.733164 | 2.21E-06 | 4.18E-05 |
| UNC79     | 138.3294 | 1.060737662 | 0.224367 | 4.727697 | 2.27E-06 | 4.28E-05 |
| UNC79.1   | 138.3294 | 1.060737662 | 0.224367 | 4.727697 | 2.27E-06 | 4.28E-05 |
| INHA      | 131.1333 | 1.188584098 | 0.25145  | 4.726922 | 2.28E-06 | 4.29E-05 |
| PTENP1-AS | 2.171543 | 1.413712154 | 0.29912  | 4.726244 | 2.29E-06 | 4.30E-05 |

|           |          |             |          |          |          |          |
|-----------|----------|-------------|----------|----------|----------|----------|
| DNAH11    | 87.49409 | -1.19055572 | 0.252382 | -4.71727 | 2.39E-06 | 4.47E-05 |
| KCNB1     | 101.2008 | 1.142438779 | 0.242462 | 4.711817 | 2.46E-06 | 4.57E-05 |
| LINC01146 | 42.98798 | 1.110255287 | 0.235737 | 4.709713 | 2.48E-06 | 4.60E-05 |
| HMGA2     | 729.6798 | -1.31340736 | 0.279018 | -4.70725 | 2.51E-06 | 4.65E-05 |
| KHDRBS2   | 9.70135  | 1.214254295 | 0.258372 | 4.699636 | 2.61E-06 | 4.80E-05 |
| SERTM1    | 32.96889 | 1.31255509  | 0.279835 | 4.690455 | 2.73E-06 | 4.99E-05 |
| TRBV5-5   | 3.086359 | 1.405716154 | 0.299907 | 4.687174 | 2.77E-06 | 5.04E-05 |
| ARL14EPL  | 4.189629 | -1.86660768 | 0.398249 | -4.68704 | 2.77E-06 | 5.04E-05 |
| TRBV2     | 11.68092 | 1.250052502 | 0.267229 | 4.677835 | 2.90E-06 | 5.24E-05 |
| SBK2      | 7.104347 | 1.363213674 | 0.291606 | 4.674841 | 2.94E-06 | 5.31E-05 |
| TRBV6-1   | 10.38808 | 1.293378496 | 0.276776 | 4.673022 | 2.97E-06 | 5.34E-05 |
| CDK5R2    | 120.5369 | 1.050003306 | 0.224719 | 4.672512 | 2.98E-06 | 5.35E-05 |
| TRBV9     | 12.21376 | 1.157441325 | 0.247837 | 4.670173 | 3.01E-06 | 5.40E-05 |
| MIR5195   | 6.550166 | 1.624850981 | 0.348363 | 4.664242 | 3.10E-06 | 5.53E-05 |
| LINGO4    | 21.82599 | 1.023966919 | 0.219576 | 4.663385 | 3.11E-06 | 5.55E-05 |
| IGLV3-21  | 1808.039 | 1.359680642 | 0.291755 | 4.660354 | 3.16E-06 | 5.61E-05 |
| STAB2     | 52.20966 | 1.13326102  | 0.243283 | 4.65821  | 3.19E-06 | 5.66E-05 |
| CA10      | 12.93829 | 1.426563405 | 0.306367 | 4.656384 | 3.22E-06 | 5.69E-05 |
| LINC00671 | 89.40439 | 1.601693167 | 0.344058 | 4.655302 | 3.24E-06 | 5.72E-05 |
| NAT16     | 33.73109 | 1.311305548 | 0.281865 | 4.652252 | 3.28E-06 | 5.79E-05 |
| ACTL6B    | 38.66557 | 1.305205197 | 0.280751 | 4.648985 | 3.34E-06 | 5.87E-05 |
| SHD       | 12.99873 | 1.43972548  | 0.309688 | 4.648958 | 3.34E-06 | 5.87E-05 |
| MIR7152   | 0.995585 | 1.652278235 | 0.355713 | 4.644975 | 3.40E-06 | 5.97E-05 |
| RIMS4     | 13.33677 | 1.063671421 | 0.229109 | 4.642649 | 3.44E-06 | 6.02E-05 |
| BHMT      | 9.329409 | 1.094964678 | 0.236208 | 4.635591 | 3.56E-06 | 6.19E-05 |
| AOX3P     | 1.09081  | 1.670192202 | 0.360323 | 4.635264 | 3.56E-06 | 6.20E-05 |
| ANKRD18B  | 19.74983 | -1.23561584 | 0.266784 | -4.63152 | 3.63E-06 | 6.29E-05 |
| TNR       | 66.01053 | 1.170853013 | 0.252799 | 4.631549 | 3.63E-06 | 6.29E-05 |
| ADAMTS16  | 235.0861 | 1.027037461 | 0.221859 | 4.629236 | 3.67E-06 | 6.35E-05 |
| IGLV5-37  | 32.0406  | 2.023474327 | 0.437228 | 4.627962 | 3.69E-06 | 6.38E-05 |
| DDX25     | 35.90634 | 1.128379908 | 0.244004 | 4.624437 | 3.76E-06 | 6.46E-05 |
| ELAVL3    | 12.23214 | 1.110783843 | 0.240256 | 4.623331 | 3.78E-06 | 6.48E-05 |
| ALB       | 1345.962 | 1.765824745 | 0.382242 | 4.619648 | 3.84E-06 | 6.57E-05 |
| MIR4420   | 1.628842 | 1.403919377 | 0.304239 | 4.614527 | 3.94E-06 | 6.71E-05 |
| BEX1      | 562.093  | 1.229887529 | 0.266863 | 4.60868  | 4.05E-06 | 6.87E-05 |
| SELE      | 287.8578 | 1.259492313 | 0.273462 | 4.605725 | 4.11E-06 | 6.95E-05 |
| IGLV3-16  | 14.49893 | 1.484383894 | 0.322437 | 4.603635 | 4.15E-06 | 7.01E-05 |
| IGLV4-3   | 6.543656 | 1.755749514 | 0.381482 | 4.602445 | 4.18E-06 | 7.04E-05 |
| NPY       | 70.44247 | 1.41822197  | 0.308369 | 4.599109 | 4.24E-06 | 7.14E-05 |
| LEP       | 118.5974 | 2.004581198 | 0.43646  | 4.592822 | 4.37E-06 | 7.30E-05 |
| GALNTL6   | 24.11641 | 1.057947074 | 0.230412 | 4.591536 | 4.40E-06 | 7.34E-05 |
| EEF1DP5   | 2.141565 | -2.87605314 | 0.626655 | -4.58954 | 4.44E-06 | 7.40E-05 |
| VSTM2L    | 3090.131 | -1.14385069 | 0.249426 | -4.58594 | 4.52E-06 | 7.51E-05 |
| IGHV3-73  | 203.484  | 1.350297451 | 0.294462 | 4.585642 | 4.53E-06 | 7.52E-05 |
| EOMES     | 83.8753  | 1.00822581  | 0.219946 | 4.583969 | 4.56E-06 | 7.57E-05 |
| FABP7     | 5.51757  | 1.607492192 | 0.350877 | 4.58136  | 4.62E-06 | 7.64E-05 |
| TRAV41    | 4.832565 | 1.241544227 | 0.271668 | 4.570076 | 4.88E-06 | 8.01E-05 |
| PENK      | 92.54739 | 1.344141769 | 0.294143 | 4.569687 | 4.88E-06 | 8.02E-05 |
| LINC01281 | 9.524373 | 1.314210929 | 0.287861 | 4.565443 | 4.98E-06 | 8.15E-05 |
| MYH7      | 51.49793 | 1.802866977 | 0.395177 | 4.562175 | 5.06E-06 | 8.26E-05 |
| TMEM213   | 30.68109 | -1.4329383  | 0.314491 | -4.55638 | 5.20E-06 | 8.44E-05 |
| IGKV2-18  | 2.082297 | 1.803907509 | 0.39612  | 4.553944 | 5.26E-06 | 8.52E-05 |
| IGHA1     | 52310.25 | 1.092561171 | 0.239995 | 4.552428 | 5.30E-06 | 8.57E-05 |
| NPY2R     | 1.767624 | 1.973742097 | 0.433897 | 4.548874 | 5.39E-06 | 8.70E-05 |

|           |           |              |           |           |           |              |
|-----------|-----------|--------------|-----------|-----------|-----------|--------------|
| NPY5R     | 9. 447666 | 1. 321015911 | 0. 290458 | 4. 548047 | 5. 41E-06 | 8. 72E-05    |
| HNRNPA1P7 | 2. 876502 | 1. 731618616 | 0. 380779 | 4. 547574 | 5. 43E-06 | 8. 73E-05    |
| KRT72     | 4. 686811 | 1. 73696138  | 0. 382573 | 4. 540206 | 5. 62E-06 | 8. 99E-05    |
| MIR8071-1 | 7. 634058 | 2. 220215349 | 0. 489028 | 4. 540057 | 5. 62E-06 | 8. 99E-05    |
| CD40LG    | 64. 63633 | 1. 046469285 | 0. 230605 | 4. 537938 | 5. 68E-06 | 9. 06E-05    |
| LINC01198 | 3. 052303 | 1. 307333706 | 0. 288162 | 4. 536804 | 5. 71E-06 | 9. 11E-05    |
| AMER3     | 72. 32788 | 1. 272906419 | 0. 280654 | 4. 5355   | 5. 75E-06 | 9. 16E-05    |
| VAV3-AS1  | 1. 817081 | 2. 077025302 | 0. 457981 | 4. 535174 | 5. 76E-06 | 9. 16E-05    |
| VAV3-AS1  | 1. 817081 | 2. 077025302 | 0. 457981 | 4. 535174 | 5. 76E-06 | 9. 16E-05    |
| SLC18A1   | 5. 765407 | 1. 174609543 | 0. 259091 | 4. 533571 | 5. 80E-06 | 9. 21E-05    |
| FGF19     | 806. 6864 | -1. 50947395 | 0. 333376 | -4. 52785 | 5. 96E-06 | 9. 45E-05    |
| AICDA     | 14. 45722 | 1. 400123764 | 0. 309348 | 4. 526055 | 6. 01E-06 | 9. 52E-05    |
| IGLV7-46  | 311. 6777 | 1. 322289064 | 0. 29238  | 4. 522502 | 6. 11E-06 | 9. 65E-05    |
| PRPH      | 111. 1314 | 1. 133248742 | 0. 250647 | 4. 521287 | 6. 15E-06 | 9. 71E-05    |
| TRBV10-3  | 7. 912297 | 1. 330763441 | 0. 294533 | 4. 518218 | 6. 24E-06 | 9. 82E-05    |
| TRAV26-2  | 3. 12222  | 1. 351551119 | 0. 299199 | 4. 517239 | 6. 27E-06 | 9. 85E-05    |
| DMBX1     | 100. 1809 | -1. 20169007 | 0. 266075 | -4. 51637 | 6. 29E-06 | 9. 87E-05    |
| TENM1     | 54. 78813 | 1. 141673329 | 0. 252837 | 4. 515458 | 6. 32E-06 | 9. 90E-05    |
| PRSS3P4   | 3. 689882 | 2. 540215464 | 0. 562745 | 4. 513974 | 6. 36E-06 | 9. 96E-05    |
| MGAT4C    | 27. 92627 | 1. 119839211 | 0. 248359 | 4. 508958 | 6. 51E-06 | 0. 000101536 |
| MGAT4C.1  | 27. 92627 | 1. 119839211 | 0. 248359 | 4. 508958 | 6. 51E-06 | 0. 000101536 |
| MGAT4C.2  | 27. 92627 | 1. 119839211 | 0. 248359 | 4. 508958 | 6. 51E-06 | 0. 000101536 |
| TGFB2-AS1 | 47. 44196 | -1. 06692689 | 0. 236625 | -4. 50893 | 6. 52E-06 | 0. 000101536 |
| TCL1B     | 1. 012985 | 2. 649064515 | 0. 587575 | 4. 50847  | 6. 53E-06 | 0. 000101715 |
| TRBV7-9   | 23. 62785 | 1. 015181157 | 0. 225316 | 4. 505587 | 6. 62E-06 | 0. 000102844 |
| SNCB      | 32. 9756  | 1. 171418602 | 0. 260155 | 4. 502779 | 6. 71E-06 | 0. 000103949 |
| CCL23     | 52. 20098 | 1. 118174494 | 0. 248366 | 4. 50212  | 6. 73E-06 | 0. 000104185 |
| CCL23.1   | 52. 20098 | 1. 118174494 | 0. 248366 | 4. 50212  | 6. 73E-06 | 0. 000104185 |
| TPO       | 44. 01503 | 1. 16369321  | 0. 258628 | 4. 499479 | 6. 81E-06 | 0. 000105222 |
| TPO.1     | 44. 01503 | 1. 16369321  | 0. 258628 | 4. 499479 | 6. 81E-06 | 0. 000105222 |
| CNTFR     | 80. 20958 | 1. 401554378 | 0. 311569 | 4. 498381 | 6. 85E-06 | 0. 0001055   |
| SLIT1     | 127. 8293 | 1. 057654327 | 0. 235536 | 4. 490417 | 7. 11E-06 | 0. 000108659 |
| TRBV14    | 6. 283684 | 1. 272334816 | 0. 283902 | 4. 481597 | 7. 41E-06 | 0. 000112407 |
| GPC5-AS1  | 10. 75755 | 1. 514947571 | 0. 338131 | 4. 480354 | 7. 45E-06 | 0. 000112831 |
| TF        | 144. 4504 | 1. 107060558 | 0. 247163 | 4. 479077 | 7. 50E-06 | 0. 000113415 |
| IGHJ3P    | 11. 92593 | 1. 430542291 | 0. 319584 | 4. 476269 | 7. 60E-06 | 0. 00011468  |
| RNU6-776F | 10. 0342  | 2. 644532608 | 0. 5909   | 4. 475429 | 7. 63E-06 | 0. 000115037 |
| BNIP3P30  | 2. 331044 | 1. 208025161 | 0. 270261 | 4. 469839 | 7. 83E-06 | 0. 000117268 |
| TRAV12-1  | 8. 679233 | 1. 146524224 | 0. 256507 | 4. 469752 | 7. 83E-06 | 0. 000117268 |
| FMN2      | 129. 8924 | 1. 091291853 | 0. 244222 | 4. 468444 | 7. 88E-06 | 0. 000117843 |
| NR4A3     | 854. 9159 | 1. 08543454  | 0. 243085 | 4. 465241 | 8. 00E-06 | 0. 000119377 |
| FCRL5     | 243. 0893 | 1. 227092948 | 0. 275176 | 4. 459305 | 8. 22E-06 | 0. 000122137 |
| IGKV1D-42 | 9. 195993 | 1. 46393445  | 0. 328284 | 4. 459353 | 8. 22E-06 | 0. 000122137 |
| TKTL1     | 6. 344499 | 1. 005704672 | 0. 22559  | 4. 458106 | 8. 27E-06 | 0. 000122772 |
| NKX6-3    | 41. 91605 | 1. 473494889 | 0. 330887 | 4. 453163 | 8. 46E-06 | 0. 000125028 |
| INSM1     | 230. 6987 | 1. 30248177  | 0. 292599 | 4. 451425 | 8. 53E-06 | 0. 000125944 |
| HS6ST3    | 74. 17871 | 1. 143385913 | 0. 256872 | 4. 451185 | 8. 54E-06 | 0. 000126034 |
| PADI4     | 12. 43534 | 1. 082835045 | 0. 243394 | 4. 44889  | 8. 63E-06 | 0. 000127133 |
| PADI4.1   | 12. 43534 | 1. 082835045 | 0. 243394 | 4. 44889  | 8. 63E-06 | 0. 000127133 |
| NRXN1     | 207. 4202 | 1. 098145118 | 0. 247976 | 4. 428436 | 9. 49E-06 | 0. 000137175 |
| HP        | 208. 4675 | 1. 286562072 | 0. 290758 | 4. 424849 | 9. 65E-06 | 0. 000138704 |
| PKHD1L1   | 22. 87315 | 1. 225395997 | 0. 277156 | 4. 421317 | 9. 81E-06 | 0. 000140716 |
| TRBV18    | 12. 73024 | 1. 171945546 | 0. 2652   | 4. 419104 | 9. 91E-06 | 0. 000141833 |
| IGKV1-27  | 386. 7375 | 1. 293792219 | 0. 292818 | 4. 418423 | 9. 94E-06 | 0. 000142225 |

|            |          |             |          |          |          |             |
|------------|----------|-------------|----------|----------|----------|-------------|
| LHX1       | 38.6983  | -1.87335393 | 0.424047 | -4.4178  | 9.97E-06 | 0.000142578 |
| LHX1.1     | 38.6983  | -1.87335393 | 0.424047 | -4.4178  | 9.97E-06 | 0.000142578 |
| POU6F2-AS1 | 1.860308 | 1.627225553 | 0.368447 | 4.416442 | 1.00E-05 | 0.000143311 |
| MT1H       | 157.5173 | 1.24898394  | 0.283197 | 4.410296 | 1.03E-05 | 0.000146642 |
| GLYAT      | 4.184268 | 2.224180761 | 0.504341 | 4.410076 | 1.03E-05 | 0.000146735 |
| SPDYE4     | 0.874386 | 1.392453516 | 0.315843 | 4.408682 | 1.04E-05 | 0.000147511 |
| MIR202HG   | 2.299417 | 1.316970802 | 0.298806 | 4.407447 | 1.05E-05 | 0.000148241 |
| LIX1       | 8.129689 | 1.125122184 | 0.255725 | 4.399741 | 1.08E-05 | 0.000152254 |
| IGLV3-25   | 1048.929 | 1.279252829 | 0.290959 | 4.396674 | 1.10E-05 | 0.000154184 |
| SLC16A12   | 263.9392 | 1.257689763 | 0.286462 | 4.390424 | 1.13E-05 | 0.000158021 |
| ANKRD62    | 3.725282 | 1.477191174 | 0.337099 | 4.382064 | 1.18E-05 | 0.000163033 |
| CELF3      | 309.1219 | 1.252322558 | 0.285886 | 4.380496 | 1.18E-05 | 0.000164025 |
| IGLC2      | 5388.399 | 1.071194947 | 0.244677 | 4.377992 | 1.20E-05 | 0.000165422 |
| IL21-AS1   | 3.952841 | 1.702889052 | 0.389137 | 4.376062 | 1.21E-05 | 0.000166558 |
| SCRT1      | 20.86163 | 1.225016925 | 0.280242 | 4.371276 | 1.24E-05 | 0.000169701 |
| SCRT1.1    | 20.86163 | 1.225016925 | 0.280242 | 4.371276 | 1.24E-05 | 0.000169701 |
| FLT3       | 156.136  | 1.035060591 | 0.237278 | 4.362234 | 1.29E-05 | 0.000175886 |
| TRAV21     | 9.075405 | 1.103830548 | 0.25314  | 4.360546 | 1.30E-05 | 0.00017705  |
| UPK3B      | 558.2589 | -1.40551381 | 0.322414 | -4.35934 | 1.30E-05 | 0.000177567 |
| UPK3B.1    | 558.2589 | -1.40551381 | 0.322414 | -4.35934 | 1.30E-05 | 0.000177567 |
| PRIMA1     | 131.4102 | 1.057374993 | 0.242964 | 4.351985 | 1.35E-05 | 0.000182619 |
| PRIMA1.1   | 131.4102 | 1.057374993 | 0.242964 | 4.351985 | 1.35E-05 | 0.000182619 |
| CLCA2      | 51.36972 | 1.637676969 | 0.376988 | 4.34411  | 1.40E-05 | 0.000187978 |
| OLIG1      | 8.1209   | 1.128888411 | 0.260265 | 4.337451 | 1.44E-05 | 0.000192846 |
| IGLV9-49   | 72.97633 | 1.418654416 | 0.327193 | 4.335829 | 1.45E-05 | 0.000193957 |
| C22orf42   | 27.45881 | 1.389649335 | 0.320519 | 4.335624 | 1.45E-05 | 0.000194032 |
| TRBV12-3   | 4.452034 | 1.283485991 | 0.296305 | 4.331635 | 1.48E-05 | 0.000196867 |
| NRSN1      | 22.96443 | 1.175117229 | 0.271325 | 4.331027 | 1.48E-05 | 0.00019734  |
| FRRS1L     | 111.2831 | 1.150033398 | 0.265856 | 4.325771 | 1.52E-05 | 0.000200871 |
| ABCC12     | 1.477665 | 2.215512233 | 0.512435 | 4.323496 | 1.54E-05 | 0.000202445 |
| SVOP       | 155.2937 | 1.287709859 | 0.298036 | 4.320655 | 1.56E-05 | 0.000204483 |
| IGLV3-32   | 1.725725 | 1.819263637 | 0.421099 | 4.320278 | 1.56E-05 | 0.000204613 |
| HPSE2      | 13.03631 | 1.019045127 | 0.236193 | 4.314466 | 1.60E-05 | 0.000209249 |
| WDR38      | 12.46349 | -1.28775501 | 0.298509 | -4.31395 | 1.60E-05 | 0.000209588 |
| UGT2B11    | 8.477397 | 1.519284337 | 0.352261 | 4.312955 | 1.61E-05 | 0.000210385 |
| PIK3CD-AS1 | 3.449385 | 1.006174234 | 0.233344 | 4.31198  | 1.62E-05 | 0.00021105  |
| CRYGD      | 4.01614  | 1.462291475 | 0.339138 | 4.311791 | 1.62E-05 | 0.000211122 |
| CRYGD.1    | 4.01614  | 1.462291475 | 0.339138 | 4.311791 | 1.62E-05 | 0.000211122 |
| TEX26-AS1  | 11.18229 | 1.0118414   | 0.234925 | 4.307088 | 1.65E-05 | 0.000215125 |
| DGKB       | 49.94933 | 1.053623984 | 0.245074 | 4.299206 | 1.71E-05 | 0.000221896 |
| ANKRD1     | 259.3768 | -1.18020789 | 0.274522 | -4.29913 | 1.71E-05 | 0.000221896 |
| PGA5       | 4.138454 | 2.007100315 | 0.467896 | 4.289633 | 1.79E-05 | 0.000229823 |
| IGF2BP1    | 91.0035  | -1.37292503 | 0.320063 | -4.28955 | 1.79E-05 | 0.000229833 |
| IGLC5      | 2.230916 | 1.996718868 | 0.465624 | 4.288264 | 1.80E-05 | 0.000231001 |
| EREG       | 669.3734 | -1.25902065 | 0.293684 | -4.287   | 1.81E-05 | 0.000231998 |
| CXCL11     | 253.2254 | -1.04958827 | 0.245046 | -4.28323 | 1.84E-05 | 0.000235139 |
| INA        | 180.8809 | 1.090172403 | 0.254588 | 4.282108 | 1.85E-05 | 0.000236251 |
| LINC01163  | 1.82783  | 1.310262954 | 0.306006 | 4.281826 | 1.85E-05 | 0.000236281 |
| IGLV1-51   | 1184.063 | 1.155601348 | 0.269918 | 4.281299 | 1.86E-05 | 0.000236537 |
| ANGPTL5    | 5.750574 | 1.055957194 | 0.246671 | 4.280837 | 1.86E-05 | 0.000236783 |
| IGLC3      | 3536.49  | 1.079410965 | 0.252711 | 4.271318 | 1.94E-05 | 0.000245424 |
| JSRP1      | 183.1616 | 1.030178315 | 0.241198 | 4.271098 | 1.95E-05 | 0.000245582 |
| GHRL       | 190.172  | 1.087010922 | 0.254533 | 4.270611 | 1.95E-05 | 0.000245714 |
| HBA2       | 292.583  | 1.257302558 | 0.295037 | 4.261511 | 2.03E-05 | 0.000254438 |

|            |          |             |          |          |          |             |
|------------|----------|-------------|----------|----------|----------|-------------|
| COX6B2     | 492.6266 | -1.07793769 | 0.25313  | -4.25843 | 2.06E-05 | 0.000257262 |
| FOXN4      | 1.331331 | 1.404126418 | 0.329924 | 4.255903 | 2.08E-05 | 0.000259662 |
| OGN        | 997.7151 | 1.097491318 | 0.258219 | 4.25024  | 2.14E-05 | 0.000265236 |
| TNFRSF17   | 59.02326 | 1.139673831 | 0.268215 | 4.249106 | 2.15E-05 | 0.000266401 |
| RPL17P22   | 3.490949 | 1.011400554 | 0.238163 | 4.246677 | 2.17E-05 | 0.000269214 |
| MTTP       | 20.66106 | 1.409313873 | 0.33232  | 4.240839 | 2.23E-05 | 0.000274554 |
| F11        | 216.1723 | 1.245501801 | 0.293829 | 4.238865 | 2.25E-05 | 0.000276014 |
| ACER1      | 3.13455  | 1.216043784 | 0.287021 | 4.236775 | 2.27E-05 | 0.000278169 |
| TRAV2      | 7.183841 | 1.096208816 | 0.258782 | 4.236033 | 2.28E-05 | 0.000278997 |
| CALCB      | 11.75622 | 1.035890863 | 0.244604 | 4.234972 | 2.29E-05 | 0.000279944 |
| ARNTL2-AS1 | 2.977156 | -1.11008443 | 0.262548 | -4.22811 | 2.36E-05 | 0.000287596 |
| HSPB3      | 2.389533 | 1.53359592  | 0.362828 | 4.226787 | 2.37E-05 | 0.000288877 |
| CHRN2      | 76.27919 | 1.081360446 | 0.256098 | 4.222442 | 2.42E-05 | 0.000293047 |
| LINC01559  | 1113.835 | -1.09537912 | 0.259625 | -4.21909 | 2.45E-05 | 0.00029695  |
| BRINP3     | 11.5097  | 1.106542022 | 0.262816 | 4.210333 | 2.55E-05 | 0.000306076 |
| LINC00668  | 32.27689 | 2.179741356 | 0.517928 | 4.20858  | 2.57E-05 | 0.000307857 |
| TRBV24-1   | 6.389445 | 1.386055655 | 0.329653 | 4.204585 | 2.62E-05 | 0.000312126 |
| CABP7      | 257.586  | 1.141042419 | 0.271439 | 4.203685 | 2.63E-05 | 0.000313022 |
| LIPK       | 5.407507 | -1.70973468 | 0.407242 | -4.19832 | 2.69E-05 | 0.000319121 |
| IGLV3-10   | 374.9745 | 1.302095119 | 0.31041  | 4.194755 | 2.73E-05 | 0.000322936 |
| GP1BA      | 81.54964 | 1.027107373 | 0.245042 | 4.191558 | 2.77E-05 | 0.00032689  |
| DPP6       | 280.3988 | 1.075404773 | 0.256707 | 4.189237 | 2.80E-05 | 0.000329511 |
| ZSCAN4     | 22.08608 | -1.1399378  | 0.272108 | -4.18928 | 2.80E-05 | 0.000329511 |
| GIMAP3P    | 1.380557 | 1.643678124 | 0.392413 | 4.188644 | 2.81E-05 | 0.000330132 |
| Clorf127   | 279.1103 | 1.184419179 | 0.282879 | 4.187022 | 2.83E-05 | 0.000331681 |
| TRAV12-3   | 9.428812 | 1.040309035 | 0.248939 | 4.178968 | 2.93E-05 | 0.000341251 |
| IGHV7-56   | 6.705123 | 1.546033806 | 0.370603 | 4.171669 | 3.02E-05 | 0.000349162 |
| TRIM72     | 14.36557 | 1.086883053 | 0.260595 | 4.170768 | 3.04E-05 | 0.000350216 |
| DCAF12L2   | 3.357952 | 1.02830685  | 0.246659 | 4.168938 | 3.06E-05 | 0.000352376 |
| GH1        | 1.30669  | 1.45470073  | 0.349027 | 4.167877 | 3.07E-05 | 0.000353675 |
| SSTR3      | 181.6041 | 1.215734031 | 0.291951 | 4.164169 | 3.12E-05 | 0.000358699 |
| HOGA1      | 198.9195 | 1.062563113 | 0.255188 | 4.163842 | 3.13E-05 | 0.000358954 |
| CHRN3      | 8.437548 | 1.54819147  | 0.37193  | 4.162591 | 3.15E-05 | 0.000360512 |
| EGF        | 190.2731 | 1.313872419 | 0.316349 | 4.153236 | 3.28E-05 | 0.000372791 |
| LINC01485  | 6.003219 | 1.184029166 | 0.285501 | 4.147202 | 3.37E-05 | 0.000381687 |
| OTOGL      | 56.3534  | 1.072342641 | 0.258695 | 4.145203 | 3.40E-05 | 0.000384216 |
| CLPSL2     | 4.412455 | 1.582313831 | 0.382191 | 4.140118 | 3.47E-05 | 0.000391616 |
| ST18       | 160.4577 | 1.046764834 | 0.252863 | 4.139653 | 3.48E-05 | 0.00039229  |
| CP         | 3728.484 | -1.05375168 | 0.254936 | -4.1334  | 3.57E-05 | 0.000400913 |
| MYT1L      | 41.3581  | 1.164483989 | 0.281736 | 4.13324  | 3.58E-05 | 0.000401066 |
| DAW1       | 19.63611 | -1.30768822 | 0.316572 | -4.13078 | 3.62E-05 | 0.000404889 |
| ELAVL4     | 124.9458 | 1.044080882 | 0.253453 | 4.119425 | 3.80E-05 | 0.00042228  |
| MIR4269    | 0.975183 | 1.518106585 | 0.368715 | 4.117296 | 3.83E-05 | 0.00042517  |
| CYP4F22    | 20.81975 | -1.18854717 | 0.288701 | -4.11688 | 3.84E-05 | 0.000425784 |
| TMEM132D   | 91.76372 | 1.25858824  | 0.305972 | 4.113408 | 3.90E-05 | 0.000430191 |
| HCN1       | 17.46181 | 1.152429406 | 0.280497 | 4.108522 | 3.98E-05 | 0.000438079 |
| GAL3ST3    | 3.239265 | 1.256892206 | 0.305936 | 4.108353 | 3.98E-05 | 0.000438241 |
| GLB1L3     | 16.79657 | 1.07161436  | 0.260953 | 4.106547 | 4.02E-05 | 0.000440785 |
| CLPSL1     | 92.23233 | 2.184291278 | 0.532742 | 4.100095 | 4.13E-05 | 0.000451638 |
| TRAV20     | 5.419483 | 1.098597678 | 0.268269 | 4.095132 | 4.22E-05 | 0.000459991 |
| PATE2      | 0.793598 | -1.58765791 | 0.387834 | -4.09365 | 4.25E-05 | 0.000462187 |
| SLC7A14    | 114.8917 | 1.22536489  | 0.299454 | 4.092    | 4.28E-05 | 0.000465349 |
| IGLV4-69   | 461.0877 | 1.181811967 | 0.288824 | 4.091802 | 4.28E-05 | 0.000465608 |
| SNCG       | 1213.229 | -1.02893721 | 0.251484 | -4.09146 | 4.29E-05 | 0.00046603  |

|           |          |             |          |          |          |             |
|-----------|----------|-------------|----------|----------|----------|-------------|
| GPS2P2    | 4.815176 | -1.18954161 | 0.290787 | -4.09077 | 4.30E-05 | 0.000467138 |
| IGHV4-55  | 61.13734 | 1.098083222 | 0.268713 | 4.086458 | 4.38E-05 | 0.000474076 |
| CYP24A1   | 244.9902 | -1.52284802 | 0.372811 | -4.08477 | 4.41E-05 | 0.000476139 |
| SLFN14    | 4.672896 | 1.139582759 | 0.279376 | 4.079035 | 4.52E-05 | 0.00048595  |
| CNTN2     | 38.12988 | 1.066047064 | 0.262341 | 4.063596 | 4.83E-05 | 0.000515131 |
| GSTA2     | 244.4426 | 1.489742801 | 0.366866 | 4.060722 | 4.89E-05 | 0.000520007 |
| REG3A     | 61484.39 | 2.273513886 | 0.560421 | 4.056794 | 4.98E-05 | 0.000527911 |
| CRB2      | 14.70853 | 1.006380227 | 0.248104 | 4.056286 | 4.99E-05 | 0.000528768 |
| TRBV3-1   | 11.95915 | 1.150618114 | 0.284189 | 4.048782 | 5.15E-05 | 0.000543177 |
| SLC39A5   | 991.7624 | 1.235628022 | 0.305258 | 4.047819 | 5.17E-05 | 0.000544633 |
| LINC00648 | 2.343173 | 1.449844811 | 0.358344 | 4.045956 | 5.21E-05 | 0.000548042 |
| GUCA1C    | 36.3499  | 2.590929314 | 0.640508 | 4.045116 | 5.23E-05 | 0.000549697 |
| KRT27     | 3.981913 | 1.073377634 | 0.265771 | 4.038733 | 5.37E-05 | 0.000562057 |
| SI        | 126.659  | 2.262100437 | 0.560492 | 4.03592  | 5.44E-05 | 0.000566498 |
| LINC00545 | 2.130243 | 1.202940615 | 0.298225 | 4.033667 | 5.49E-05 | 0.000570024 |
| CHRM3-AS2 | 25.00636 | 1.000196305 | 0.248097 | 4.031474 | 5.54E-05 | 0.00057456  |
| IGLC6     | 16.41077 | 1.077814885 | 0.267478 | 4.029545 | 5.59E-05 | 0.000577829 |
| UNC80     | 198.8186 | 1.173055521 | 0.29114  | 4.029174 | 5.60E-05 | 0.000578253 |
| TCEAL6    | 13.14245 | 1.024453342 | 0.254481 | 4.025657 | 5.68E-05 | 0.00058532  |
| ANXA8L1   | 354.6055 | -1.00614457 | 0.249938 | -4.02558 | 5.68E-05 | 0.000585352 |
| MAP3K15   | 47.86845 | 1.076214086 | 0.267552 | 4.022454 | 5.76E-05 | 0.000592179 |
| BTNL2     | 1.473193 | 1.556208068 | 0.387157 | 4.019583 | 5.83E-05 | 0.00059777  |
| BTNL2.1   | 1.473193 | 1.556208068 | 0.387157 | 4.019583 | 5.83E-05 | 0.00059777  |
| BTNL2.2   | 1.473193 | 1.556208068 | 0.387157 | 4.019583 | 5.83E-05 | 0.00059777  |
| BTNL2.3   | 1.473193 | 1.556208068 | 0.387157 | 4.019583 | 5.83E-05 | 0.00059777  |
| BTNL2.4   | 1.473193 | 1.556208068 | 0.387157 | 4.019583 | 5.83E-05 | 0.00059777  |
| BTNL2.5   | 1.473193 | 1.556208068 | 0.387157 | 4.019583 | 5.83E-05 | 0.00059777  |
| BTNL2.6   | 1.473193 | 1.556208068 | 0.387157 | 4.019583 | 5.83E-05 | 0.00059777  |
| BTNL2.7   | 1.473193 | 1.556208068 | 0.387157 | 4.019583 | 5.83E-05 | 0.00059777  |
| RIMBP2    | 213.2721 | 1.031919796 | 0.256803 | 4.018329 | 5.86E-05 | 0.000600486 |
| HHATL     | 23.41399 | 1.334865678 | 0.332296 | 4.017104 | 5.89E-05 | 0.0006031   |
| PPP1R1A   | 441.9535 | 1.14054665  | 0.285601 | 3.993495 | 6.51E-05 | 0.000655664 |
| RNU6-5P   | 1.381081 | 1.241913568 | 0.311263 | 3.989916 | 6.61E-05 | 0.000663277 |
| ADCYAP1   | 463.1617 | 1.064663417 | 0.266856 | 3.989652 | 6.62E-05 | 0.000663651 |
| RPL31P12  | 1.14022  | 1.680473568 | 0.421317 | 3.988616 | 6.65E-05 | 0.000665467 |
| ZNF750    | 30.49089 | -1.04512441 | 0.26243  | -3.98249 | 6.82E-05 | 0.000680443 |
| FAR2P1    | 19.37295 | 1.668395471 | 0.419874 | 3.973559 | 7.08E-05 | 0.000700628 |
| CLEC4C    | 4.22858  | 1.38114175  | 0.348252 | 3.96593  | 7.31E-05 | 0.000719714 |
| FBXO40    | 1.133726 | 1.2076297   | 0.304637 | 3.964154 | 7.37E-05 | 0.000724317 |
| DPP10-AS1 | 25.9119  | 1.79317195  | 0.452354 | 3.964087 | 7.37E-05 | 0.000724326 |
| TRBV23-1  | 3.709445 | 1.182543946 | 0.298396 | 3.962999 | 7.40E-05 | 0.000727248 |
| RXRG      | 89.41998 | 1.151313063 | 0.290845 | 3.958506 | 7.54E-05 | 0.000738104 |
| IGLV2-28  | 7.185862 | 1.246112876 | 0.314944 | 3.95662  | 7.60E-05 | 0.000742221 |
| IGKV1D-39 | 19.2422  | 1.635665212 | 0.413467 | 3.955977 | 7.62E-05 | 0.000743387 |
| CALY      | 183.9631 | 1.099030277 | 0.277825 | 3.955836 | 7.63E-05 | 0.000743627 |
| EPHA5-AS1 | 1.764336 | 1.41265461  | 0.35712  | 3.955684 | 7.63E-05 | 0.000743706 |
| NPBWR1    | 27.09756 | -1.52620133 | 0.386522 | -3.94855 | 7.86E-05 | 0.000759974 |
| KLHL1     | 8.046565 | 1.503637073 | 0.380902 | 3.947568 | 7.89E-05 | 0.000762298 |
| CRABP1    | 37.91816 | 1.164213328 | 0.294942 | 3.947267 | 7.90E-05 | 0.000762738 |
| IGHV3-7   | 63.6572  | 1.237234933 | 0.313616 | 3.945066 | 7.98E-05 | 0.00076748  |
| CPNE6     | 9.303945 | 1.115312278 | 0.283129 | 3.939231 | 8.17E-05 | 0.000781887 |
| CPNE6.1   | 9.303945 | 1.115312278 | 0.283129 | 3.939231 | 8.17E-05 | 0.000781887 |
| ARMC3     | 58.15283 | -1.02684767 | 0.261065 | -3.9333  | 8.38E-05 | 0.000798133 |
| SH3GL2    | 135.5565 | 1.207169224 | 0.30712  | 3.930616 | 8.47E-05 | 0.000805621 |

|            |          |             |          |          |          |             |
|------------|----------|-------------|----------|----------|----------|-------------|
| PHEX-AS1   | 0.576117 | 1.814174546 | 0.461752 | 3.928894 | 8.53E-05 | 0.000809636 |
| TRAV1-2    | 5.794532 | 1.004374607 | 0.255757 | 3.927064 | 8.60E-05 | 0.00081529  |
| KISS1      | 61.06541 | -1.10169419 | 0.280644 | -3.92559 | 8.65E-05 | 0.000819884 |
| CXCL13     | 826.2088 | 1.473263874 | 0.375595 | 3.922482 | 8.76E-05 | 0.000829033 |
| NEURL1-AS1 | 2.183173 | 1.710796079 | 0.436372 | 3.920504 | 8.84E-05 | 0.000833937 |
| VIT        | 56.36926 | 1.042607294 | 0.267024 | 3.904539 | 9.44E-05 | 0.000881035 |
| CARTPT     | 59.52706 | 1.490941825 | 0.382833 | 3.894497 | 9.84E-05 | 0.00091183  |
| GALR1      | 10.56007 | 1.07269386  | 0.275691 | 3.890925 | 9.99E-05 | 0.000923267 |
| TRAV1-1    | 2.374447 | 1.143656566 | 0.294703 | 3.880707 | 0.000104 | 0.000955248 |
| SCGN       | 1419.733 | 1.217274782 | 0.313717 | 3.880167 | 0.000104 | 0.000957014 |
| IGKV3D-2C  | 153.0053 | 1.111756055 | 0.286605 | 3.879057 | 0.000105 | 0.000960075 |
| IGKV1D-4C  | 15.31228 | 1.338614025 | 0.345504 | 3.874376 | 0.000107 | 0.000975801 |
| GTSF1L     | 2.138063 | 1.225954522 | 0.317487 | 3.861431 | 0.000113 | 0.001020129 |
| OR2T10     | 0.638855 | 1.774341045 | 0.459649 | 3.860207 | 0.000113 | 0.001024242 |
| DAZL       | 7.029589 | 1.249161097 | 0.323819 | 3.857593 | 0.000115 | 0.001032717 |
| SPINK7     | 5.713736 | -1.19513694 | 0.309985 | -3.85547 | 0.000116 | 0.001040442 |
| KCNQ2      | 80.92877 | 1.078045474 | 0.279732 | 3.853852 | 0.000116 | 0.001044789 |
| KCNQ2.1    | 80.92877 | 1.078045474 | 0.279732 | 3.853852 | 0.000116 | 0.001044789 |
| HMGCLL1    | 87.48016 | 1.008631887 | 0.262131 | 3.847814 | 0.000119 | 0.001065132 |
| CCL19      | 1713.334 | 1.157103474 | 0.301365 | 3.839547 | 0.000123 | 0.001094738 |
| CA4        | 178.0157 | 1.260501292 | 0.328344 | 3.838961 | 0.000124 | 0.001096827 |
| C10orf71   | 3.127285 | 2.151858186 | 0.56068  | 3.837944 | 0.000124 | 0.001100315 |
| UGT1A13P   | 1.161432 | -1.25849008 | 0.328019 | -3.83664 | 0.000125 | 0.001104326 |
| LDLRAD4-1  | 2.161075 | 1.025527726 | 0.267314 | 3.836417 | 0.000125 | 0.001105043 |
| RNU6-26P   | 4.783056 | -1.00991985 | 0.263418 | -3.83391 | 0.000126 | 0.001115568 |
| IGLVI-63   | 1.088091 | 1.965802109 | 0.512937 | 3.832445 | 0.000127 | 0.001120345 |
| S100A2     | 5154.326 | -1.3898653  | 0.362962 | -3.82923 | 0.000129 | 0.001132377 |
| ADIPOQ     | 392.8685 | 2.297446765 | 0.600069 | 3.828641 | 0.000129 | 0.001134807 |
| OR7E91P    | 32.13017 | -1.06298282 | 0.27799  | -3.82382 | 0.000131 | 0.001152402 |
| RNU4ATAC   | 2.300383 | 1.123641399 | 0.294232 | 3.818896 | 0.000134 | 0.001172716 |
| IGHV1-58   | 93.91505 | 1.254282112 | 0.328809 | 3.814623 | 0.000136 | 0.001190079 |
| GRPR       | 23.43727 | 1.08504689  | 0.284632 | 3.8121   | 0.000138 | 0.001200586 |
| MIR7-3HG   | 184.1179 | 1.157296696 | 0.304091 | 3.805762 | 0.000141 | 0.001225082 |
| MMD2       | 0.700368 | 1.602954982 | 0.42141  | 3.803786 | 0.000143 | 0.001232866 |
| ALPP       | 173.3239 | -1.34070361 | 0.352935 | -3.79873 | 0.000145 | 0.001252684 |
| PNLIPRP2   | 11497.66 | 2.167399617 | 0.570701 | 3.797782 | 0.000146 | 0.001255992 |
| PRAMENP    | 8.273733 | 1.358440434 | 0.357861 | 3.795997 | 0.000147 | 0.00126302  |
| CHRNA2     | 3.471623 | 1.377586932 | 0.363125 | 3.793694 | 0.000148 | 0.001271828 |
| SFTPC      | 2.326309 | 1.769443483 | 0.466679 | 3.791568 | 0.00015  | 0.00128068  |
| KCNC2      | 6.527417 | 1.06504853  | 0.280926 | 3.791207 | 0.00015  | 0.001281814 |
| SLC38A3    | 424.8619 | 1.200545664 | 0.316702 | 3.790769 | 0.00015  | 0.001283059 |
| MIR4537    | 2.564447 | 1.802451589 | 0.475689 | 3.789135 | 0.000151 | 0.001289084 |
| IGLV1-50   | 16.09391 | 1.19223366  | 0.314699 | 3.788491 | 0.000152 | 0.001291831 |
| TRAV3      | 7.992391 | 1.017913141 | 0.268927 | 3.785094 | 0.000154 | 0.001305374 |
| RPL37P1    | 4.811191 | -1.03943422 | 0.274742 | -3.78332 | 0.000155 | 0.001312313 |
| SLC4A10    | 113.9843 | 1.092201956 | 0.288891 | 3.780667 | 0.000156 | 0.001324524 |
| UCN3       | 307.045  | 1.075292886 | 0.284591 | 3.778383 | 0.000158 | 0.001333659 |
| APOH       | 254.2325 | 1.072396016 | 0.284175 | 3.773713 | 0.000161 | 0.001353599 |
| IGLV1-40   | 1962.27  | 1.036404986 | 0.275371 | 3.763664 | 0.000167 | 0.001399212 |
| RNU4-2     | 12.02007 | 1.031930208 | 0.274954 | 3.753098 | 0.000175 | 0.001445809 |
| LINC01586  | 5.270001 | 1.212672461 | 0.32332  | 3.750689 | 0.000176 | 0.001458462 |
| MIR3131    | 12.55257 | -1.24124072 | 0.331086 | -3.749   | 0.000178 | 0.001466029 |
| PRRT4      | 18.27088 | 1.00032715  | 0.266955 | 3.747181 | 0.000179 | 0.001474031 |
| MAPT-IT1   | 1.620965 | 1.391890279 | 0.371496 | 3.746722 | 0.000179 | 0.001476399 |



|           |           |              |           |           |           |              |
|-----------|-----------|--------------|-----------|-----------|-----------|--------------|
| MAPT-IT1. | 1. 620965 | 1. 391890279 | 0. 371496 | 3. 746722 | 0. 000179 | 0. 001476399 |
| MAPT-IT1. | 1. 620965 | 1. 391890279 | 0. 371496 | 3. 746722 | 0. 000179 | 0. 001476399 |
| KCNMB2    | 91. 67137 | 1. 064754991 | 0. 284354 | 3. 744471 | 0. 000181 | 0. 001488027 |
| IGHV1-45  | 21. 44492 | 1. 109873892 | 0. 296591 | 3. 742108 | 0. 000182 | 0. 001499422 |
| CDH10     | 42. 58785 | 1. 106573111 | 0. 2963   | 3. 734632 | 0. 000188 | 0. 001537447 |
| CTD-3080F | 14. 41957 | 1. 052874239 | 0. 282122 | 3. 731982 | 0. 00019  | 0. 00155233  |
| PABPN1L   | 1. 237096 | 1. 237184431 | 0. 331591 | 3. 731051 | 0. 000191 | 0. 001557733 |
| SLC30A2   | 624. 8609 | 1. 199129588 | 0. 322323 | 3. 720269 | 0. 000199 | 0. 001617507 |
| GPR142    | 25. 31914 | 1. 00596753  | 0. 270713 | 3. 715989 | 0. 000202 | 0. 001641508 |
| PHOX2A    | 5. 898708 | 1. 265203372 | 0. 34088  | 3. 711581 | 0. 000206 | 0. 001666691 |
| CELA1     | 1. 917394 | 1. 251210648 | 0. 33804  | 3. 701369 | 0. 000214 | 0. 001723106 |
| LCT       | 13. 97661 | 1. 481023787 | 0. 400169 | 3. 700996 | 0. 000215 | 0. 001724533 |
| IGLV2-8   | 605. 7418 | 1. 042907663 | 0. 281813 | 3. 700708 | 0. 000215 | 0. 001725952 |
| IGHV3-22  | 3. 210055 | 1. 206197162 | 0. 326079 | 3. 699092 | 0. 000216 | 0. 001735603 |
| MIR342    | 0. 690672 | 1. 666195189 | 0. 450567 | 3. 697996 | 0. 000217 | 0. 00174235  |
| ITLN2     | 5. 672262 | 1. 605685608 | 0. 43454  | 3. 695138 | 0. 00022  | 0. 001758619 |
| MBD3L1    | 1. 890834 | 1. 912421569 | 0. 518162 | 3. 690777 | 0. 000224 | 0. 001783226 |
| FCAMR     | 40. 70816 | 1. 14535651  | 0. 310586 | 3. 687733 | 0. 000226 | 0. 001798062 |
| TH        | 34. 4416  | -1. 15724036 | 0. 313899 | -3. 68667 | 0. 000227 | 0. 001803659 |
| TMEM196   | 46. 66374 | 1. 184906554 | 0. 321547 | 3. 685013 | 0. 000229 | 0. 001812284 |
| STXBP5L   | 45. 50124 | 1. 058139535 | 0. 287253 | 3. 683649 | 0. 00023  | 0. 001820245 |
| TCF23     | 33. 89913 | 1. 026081391 | 0. 278557 | 3. 683566 | 0. 00023  | 0. 001820252 |
| UMODL1-AS | 1. 542751 | 1. 22071826  | 0. 331803 | 3. 679049 | 0. 000234 | 0. 001850005 |
| IL6       | 253. 3884 | 1. 06285641  | 0. 288947 | 3. 678378 | 0. 000235 | 0. 001852704 |
| NGB       | 5. 812324 | 1. 291082199 | 0. 351158 | 3. 676641 | 0. 000236 | 0. 001861549 |
| ABRA      | 3. 62337  | 1. 170361236 | 0. 318732 | 3. 671924 | 0. 000241 | 0. 001890588 |
| LINC0139E | 1. 591077 | -1. 39457834 | 0. 379836 | -3. 67153 | 0. 000241 | 0. 001893086 |
| GPR42     | 1. 173304 | 1. 161135416 | 0. 316308 | 3. 670898 | 0. 000242 | 0. 001896572 |
| MIR205HG  | 180. 4569 | -1. 80204818 | 0. 490947 | -3. 67056 | 0. 000242 | 0. 001897083 |
| MIR7848   | 1. 718311 | 1. 004749467 | 0. 273815 | 3. 669449 | 0. 000243 | 0. 001904513 |
| IGHV1-69  | 210. 0085 | 1. 256892878 | 0. 342964 | 3. 66479  | 0. 000248 | 0. 001934567 |
| VSX2      | 1. 100992 | 1. 378605775 | 0. 376198 | 3. 664573 | 0. 000248 | 0. 001935338 |
| NPAP1     | 1. 758939 | 1. 169886912 | 0. 319949 | 3. 656479 | 0. 000256 | 0. 001985696 |
| TNNI3     | 56. 87212 | -1. 18701191 | 0. 324746 | -3. 65521 | 0. 000257 | 0. 001994733 |
| AXDND1    | 91. 47561 | -1. 15701032 | 0. 316973 | -3. 65019 | 0. 000262 | 0. 002027649 |
| IGLV3-12  | 12. 47298 | 1. 19993416  | 0. 328735 | 3. 65016  | 0. 000262 | 0. 002027649 |
| SULT1B1   | 1970. 515 | -1. 00905611 | 0. 276876 | -3. 64443 | 0. 000268 | 0. 00206797  |
| SPIC      | 1. 483061 | 1. 51125498  | 0. 415197 | 3. 639849 | 0. 000273 | 0. 002100261 |
| GAD2      | 485. 3732 | 1. 204976035 | 0. 331828 | 3. 631331 | 0. 000282 | 0. 002152355 |
| LINC0125E | 0. 658133 | 1. 684632334 | 0. 464112 | 3. 629799 | 0. 000284 | 0. 002163375 |
| IGHD2-2   | 0. 727399 | 1. 620972424 | 0. 446728 | 3. 628546 | 0. 000285 | 0. 0021721   |
| FXVD2     | 1507. 41  | 1. 00799127  | 0. 278193 | 3. 623354 | 0. 000291 | 0. 002208861 |
| IGLV7-43  | 197. 3654 | 1. 067621379 | 0. 294933 | 3. 619881 | 0. 000295 | 0. 002232731 |
| HTR1E     | 0. 726147 | 1. 612904401 | 0. 446039 | 3. 616063 | 0. 000299 | 0. 002258461 |
| MB        | 124. 6565 | -1. 0062622  | 0. 278292 | -3. 61585 | 0. 000299 | 0. 002259794 |
| ABCC8     | 2293. 022 | 1. 113763681 | 0. 308676 | 3. 6082   | 0. 000308 | 0. 0023147   |
| DPYSL5    | 17. 4655  | 1. 039964939 | 0. 288341 | 3. 606724 | 0. 00031  | 0. 002324967 |
| IGLV4-60  | 128. 6532 | 1. 326259095 | 0. 367806 | 3. 605869 | 0. 000311 | 0. 002328927 |
| LRRC26    | 10. 02062 | 1. 205945319 | 0. 335044 | 3. 599364 | 0. 000319 | 0. 002372829 |
| COX6A2    | 2. 788134 | 1. 252786135 | 0. 348201 | 3. 597885 | 0. 000321 | 0. 002382667 |
| CLDN19    | 1. 76952  | 1. 202790911 | 0. 335727 | 3. 582645 | 0. 00034  | 0. 002491912 |
| IGKV1-17  | 430. 4838 | 1. 034672211 | 0. 288956 | 3. 580721 | 0. 000343 | 0. 002507339 |
| SCN10A    | 1. 378877 | 1. 262155525 | 0. 352863 | 3. 576898 | 0. 000348 | 0. 002538721 |
| TRAV35    | 2. 507326 | 1. 081381283 | 0. 30253  | 3. 574464 | 0. 000351 | 0. 002557885 |

|           |           |              |           |           |           |              |
|-----------|-----------|--------------|-----------|-----------|-----------|--------------|
| UTF1      | 1. 320841 | 1. 20606344  | 0. 337504 | 3. 573475 | 0. 000352 | 0. 002565034 |
| TMEM95    | 0. 982228 | 1. 210035095 | 0. 338902 | 3. 570461 | 0. 000356 | 0. 002585515 |
| TMEM95.1  | 0. 982228 | 1. 210035095 | 0. 338902 | 3. 570461 | 0. 000356 | 0. 002585515 |
| NLRP4     | 4. 164134 | 1. 702298387 | 0. 477143 | 3. 567687 | 0. 00036  | 0. 002605328 |
| C6orf15   | 174. 9947 | -1. 45504126 | 0. 408412 | -3. 56268 | 0. 000367 | 0. 002643577 |
| C6orf15.1 | 174. 9947 | -1. 45504126 | 0. 408412 | -3. 56268 | 0. 000367 | 0. 002643577 |
| C6orf15.2 | 174. 9947 | -1. 45504126 | 0. 408412 | -3. 56268 | 0. 000367 | 0. 002643577 |
| C6orf15.3 | 174. 9947 | -1. 45504126 | 0. 408412 | -3. 56268 | 0. 000367 | 0. 002643577 |
| C6orf15.4 | 174. 9947 | -1. 45504126 | 0. 408412 | -3. 56268 | 0. 000367 | 0. 002643577 |
| C6orf15.5 | 174. 9947 | -1. 45504126 | 0. 408412 | -3. 56268 | 0. 000367 | 0. 002643577 |
| IGKV2D-24 | 17. 61174 | 1. 185519618 | 0. 332879 | 3. 56141  | 0. 000369 | 0. 002652693 |
| CDH22     | 239. 7918 | 1. 012781737 | 0. 284608 | 3. 55852  | 0. 000373 | 0. 002676369 |
| NAV2-AS2  | 1. 741029 | 1. 325775362 | 0. 372573 | 3. 558435 | 0. 000373 | 0. 00267671  |
| ETV3L     | 1. 158355 | 1. 346234228 | 0. 378828 | 3. 553682 | 0. 00038  | 0. 002717072 |
| ARL5C     | 1. 005104 | 1. 302797465 | 0. 367086 | 3. 549029 | 0. 000387 | 0. 002753218 |
| TRAJ1     | 0. 720176 | 1. 53023867  | 0. 431427 | 3. 546928 | 0. 00039  | 0. 002769686 |
| RPL3L     | 22. 9481  | 1. 089467206 | 0. 30745  | 3. 543562 | 0. 000395 | 0. 002802256 |
| IGKV2-26  | 3. 986308 | 1. 374254478 | 0. 387854 | 3. 543228 | 0. 000395 | 0. 002805266 |
| TRBJ2-4   | 1. 433209 | 1. 218342659 | 0. 343873 | 3. 543006 | 0. 000396 | 0. 002807093 |
| TRBV11-3  | 1. 653116 | 1. 331645302 | 0. 376377 | 3. 538061 | 0. 000403 | 0. 002853038 |
| ASCL4     | 1. 41616  | 1. 101598614 | 0. 311807 | 3. 532947 | 0. 000411 | 0. 002897725 |
| LINC00602 | 1. 21523  | 1. 321913155 | 0. 374441 | 3. 530362 | 0. 000415 | 0. 002916727 |
| ANGPTL7   | 130. 2785 | 1. 236916646 | 0. 35065  | 3. 527492 | 0. 00042  | 0. 002943895 |
| IGHV3-43  | 112. 4761 | 1. 090974329 | 0. 309393 | 3. 526173 | 0. 000422 | 0. 002955776 |
| AQP7P2    | 1. 611915 | 1. 14072338  | 0. 323715 | 3. 523856 | 0. 000425 | 0. 002977774 |
| IGHV3-20  | 45. 48043 | 1. 056882833 | 0. 300001 | 3. 522936 | 0. 000427 | 0. 002986996 |
| UMOD      | 16. 34546 | 1. 837721508 | 0. 523738 | 3. 508854 | 0. 00045  | 0. 003118249 |
| MIR561    | 0. 91035  | -1. 32028986 | 0. 376319 | -3. 50843 | 0. 000451 | 0. 00312265  |
| LYPD2     | 199. 3721 | -1. 5002685  | 0. 428254 | -3. 50322 | 0. 00046  | 0. 003173006 |
| RAPGEF4-1 | 1. 33271  | 1. 219627371 | 0. 349386 | 3. 490775 | 0. 000482 | 0. 00329579  |
| LINC00616 | 5. 676307 | 1. 116446063 | 0. 320106 | 3. 487736 | 0. 000487 | 0. 003325714 |
| MIR208B   | 1. 041762 | 2. 53481771  | 0. 727626 | 3. 483682 | 0. 000495 | 0. 003370241 |
| LGALS17A  | 9. 209808 | -1. 26141271 | 0. 36284  | -3. 4765  | 0. 000508 | 0. 003442695 |
| OR1Q1     | 0. 892353 | -1. 5896781  | 0. 457312 | -3. 47613 | 0. 000509 | 0. 003445024 |
| TUNAR     | 151. 9375 | 1. 038237555 | 0. 298856 | 3. 474043 | 0. 000513 | 0. 00346669  |
| LINC01014 | 7. 570166 | 1. 06355101  | 0. 306273 | 3. 472564 | 0. 000516 | 0. 003480727 |
| SIRPG-AS1 | 4. 178646 | 1. 05856558  | 0. 304832 | 3. 472617 | 0. 000515 | 0. 003480727 |
| PLA2G2D   | 158. 973  | 1. 070696743 | 0. 308663 | 3. 468819 | 0. 000523 | 0. 003521847 |
| PRSS41    | 13. 4615  | 1. 247916267 | 0. 359812 | 3. 468243 | 0. 000524 | 0. 00352806  |
| IGKV1D-12 | 11. 19135 | 1. 152803636 | 0. 33293  | 3. 462599 | 0. 000535 | 0. 003587177 |
| HOXA13    | 339. 2743 | -1. 18031339 | 0. 341011 | -3. 46122 | 0. 000538 | 0. 00360166  |
| LINC01016 | 1. 250338 | 1. 17462538  | 0. 340214 | 3. 452611 | 0. 000555 | 0. 003693688 |
| SCG3      | 1027. 414 | 1. 061424312 | 0. 307454 | 3. 4523   | 0. 000556 | 0. 003697279 |
| CPN1      | 2. 770539 | 1. 224814346 | 0. 354842 | 3. 451721 | 0. 000557 | 0. 003703225 |
| IGKV6D-41 | 1. 374532 | 1. 757718489 | 0. 509636 | 3. 448968 | 0. 000563 | 0. 00373578  |
| OSTN      | 2. 961781 | 1. 300986286 | 0. 377256 | 3. 448549 | 0. 000564 | 0. 003740229 |
| LBX1      | 1. 175269 | 2. 764219733 | 0. 801967 | 3. 446801 | 0. 000567 | 0. 003756381 |
| AMY1A     | 1. 097829 | 3. 11916356  | 0. 905826 | 3. 443448 | 0. 000574 | 0. 003796432 |
| IGHV1-17  | 4. 479604 | 1. 223383947 | 0. 355306 | 3. 443187 | 0. 000575 | 0. 003798736 |
| CLEC4M    | 1. 824824 | 1. 592520155 | 0. 462873 | 3. 440511 | 0. 000581 | 0. 003822558 |
| LINC00595 | 1. 939559 | 1. 118013582 | 0. 325285 | 3. 437033 | 0. 000588 | 0. 003861821 |
| IGHV2-70  | 67. 67551 | 1. 311845236 | 0. 382701 | 3. 427862 | 0. 000608 | 0. 00396418  |
| PAX9      | 111. 2474 | -1. 03823955 | 0. 303009 | -3. 42643 | 0. 000612 | 0. 003978871 |
| NOL4      | 134. 5551 | 1. 033589943 | 0. 301652 | 3. 426429 | 0. 000612 | 0. 003978871 |

|            |           |              |           |           |           |              |
|------------|-----------|--------------|-----------|-----------|-----------|--------------|
| MAS1LP1    | 1. 424758 | 1. 356559946 | 0. 395944 | 3. 426145 | 0. 000612 | 0. 003980904 |
| UTS2R      | 2. 666634 | 1. 205582406 | 0. 352118 | 3. 423805 | 0. 000618 | 0. 004008248 |
| UNC5D      | 21. 05124 | 1. 052516311 | 0. 307551 | 3. 42225  | 0. 000621 | 0. 004028404 |
| LINC00161  | 0. 769956 | 1. 353390874 | 0. 395774 | 3. 419606 | 0. 000627 | 0. 004057026 |
| RNU6-892F  | 0. 963664 | 1. 006674764 | 0. 294551 | 3. 417661 | 0. 000632 | 0. 004075371 |
| IGHD3-3    | 1. 909218 | 1. 358369197 | 0. 399041 | 3. 404088 | 0. 000664 | 0. 004247598 |
| TEX35      | 5. 135885 | -1. 25693132 | 0. 369404 | -3. 4026  | 0. 000667 | 0. 004265428 |
| MYL7       | 3. 493709 | 1. 083788906 | 0. 318568 | 3. 402063 | 0. 000669 | 0. 004271024 |
| DPP10      | 59. 45065 | 1. 156160179 | 0. 340237 | 3. 3981   | 0. 000679 | 0. 004317629 |
| FFAR1      | 170. 1639 | 1. 114952188 | 0. 328308 | 3. 396053 | 0. 000684 | 0. 004341049 |
| HS3ST4     | 3. 069712 | 1. 075119824 | 0. 31696  | 3. 391968 | 0. 000694 | 0. 004387339 |
| SYT4       | 265. 8017 | 1. 003314215 | 0. 295783 | 3. 392065 | 0. 000694 | 0. 004387339 |
| LINC01284  | 0. 862415 | 1. 368979632 | 0. 403592 | 3. 39199  | 0. 000694 | 0. 004387339 |
| IGKV2-28   | 16. 5567  | 1. 454863663 | 0. 430044 | 3. 38306  | 0. 000717 | 0. 004501973 |
| RFPL4A     | 0. 792451 | 1. 228364554 | 0. 363298 | 3. 381144 | 0. 000722 | 0. 004526526 |
| ELOVL2-AS1 | 1. 141428 | 1. 141110952 | 0. 337676 | 3. 379307 | 0. 000727 | 0. 004548359 |
| GACAT3     | 0. 920473 | 1. 338018867 | 0. 396222 | 3. 376942 | 0. 000733 | 0. 004576734 |
| TRAV25     | 3. 673265 | 1. 018304963 | 0. 301589 | 3. 376469 | 0. 000734 | 0. 004583061 |
| IGHV3-48   | 209. 3987 | 1. 052759043 | 0. 312213 | 3. 371928 | 0. 000746 | 0. 004646672 |
| RPS17P1    | 1. 44896  | 1. 067717754 | 0. 317033 | 3. 367848 | 0. 000758 | 0. 004703243 |
| XKR3       | 0. 931382 | 1. 331661214 | 0. 395496 | 3. 36707  | 0. 00076  | 0. 004714148 |
| TMPRSS11F  | 49. 57318 | -1. 14015399 | 0. 339609 | -3. 35726 | 0. 000787 | 0. 004864181 |
| TMPRSS11F  | 49. 57318 | -1. 14015399 | 0. 339609 | -3. 35726 | 0. 000787 | 0. 004864181 |
| PADI1      | 3542. 805 | -1. 02702548 | 0. 306098 | -3. 35522 | 0. 000793 | 0. 004894336 |
| PADI1. 1   | 3542. 805 | -1. 02702548 | 0. 306098 | -3. 35522 | 0. 000793 | 0. 004894336 |
| OSTN-AS1   | 2. 864095 | 1. 091846891 | 0. 325798 | 3. 351296 | 0. 000804 | 0. 004950989 |
| SSTR4      | 0. 904339 | 1. 4633405   | 0. 436831 | 3. 3499   | 0. 000808 | 0. 004969439 |
| RNA5SP462  | 1. 320873 | -1. 01177346 | 0. 303179 | -3. 33721 | 0. 000846 | 0. 005168129 |
| IGHV3-38   | 11. 31805 | 1. 066986213 | 0. 320048 | 3. 333828 | 0. 000857 | 0. 005218557 |
| TRAV36DV7  | 3. 614006 | 1. 01361296  | 0. 304589 | 3. 327802 | 0. 000875 | 0. 005307173 |
| IGHV3-33-  | 0. 910477 | 1. 414069204 | 0. 425335 | 3. 3246   | 0. 000885 | 0. 005349973 |
| KRT13      | 802. 7057 | -1. 23007485 | 0. 370106 | -3. 32357 | 0. 000889 | 0. 005366198 |
| RFX6       | 149. 6563 | 1. 040834446 | 0. 313282 | 3. 32236  | 0. 000893 | 0. 005383376 |
| SNORD56    | 0. 66559  | -1. 47412655 | 0. 443955 | -3. 32044 | 0. 000899 | 0. 005414301 |
| TRDN       | 3. 979231 | 1. 338051106 | 0. 403341 | 3. 31742  | 0. 000909 | 0. 005461569 |
| KRT9       | 6. 794122 | -1. 00328595 | 0. 303283 | -3. 30809 | 0. 000939 | 0. 005610182 |
| AQP10      | 26. 23024 | 1. 038305807 | 0. 31395  | 3. 307231 | 0. 000942 | 0. 005624635 |
| ANKRD44-1  | 1. 833015 | 1. 06357852  | 0. 321676 | 3. 306368 | 0. 000945 | 0. 005638986 |
| SNORD113-  | 0. 670379 | 1. 179965914 | 0. 357458 | 3. 300992 | 0. 000963 | 0. 005723356 |
| RNF225     | 2. 12679  | -1. 24606008 | 0. 377678 | -3. 29927 | 0. 000969 | 0. 005746539 |
| MSMB       | 188. 3727 | 1. 327167364 | 0. 402438 | 3. 297819 | 0. 000974 | 0. 005771641 |
| REG1B      | 19672. 03 | 1. 732893848 | 0. 526242 | 3. 292958 | 0. 000991 | 0. 005854445 |
| SLC13A5    | 888. 8344 | -1. 08452348 | 0. 329669 | -3. 28974 | 0. 001003 | 0. 00590571  |
| LINC01169  | 11. 81697 | -1. 23733859 | 0. 37634  | -3. 28783 | 0. 00101  | 0. 005940285 |
| CTXN2      | 3. 823756 | 1. 077578852 | 0. 327887 | 3. 286434 | 0. 001015 | 0. 005964935 |
| FOXD4L5    | 2. 04505  | -1. 24085854 | 0. 37761  | -3. 28609 | 0. 001016 | 0. 005971356 |
| LINC00309  | 1. 237487 | 1. 425931532 | 0. 434654 | 3. 28061  | 0. 001036 | 0. 006060416 |
| CSMD3      | 5. 68433  | 1. 052553515 | 0. 321564 | 3. 273231 | 0. 001063 | 0. 006183224 |
| GJD2       | 316. 7196 | 1. 136711488 | 0. 347336 | 3. 272661 | 0. 001065 | 0. 006190098 |
| NEUROD1    | 443. 2196 | 1. 089804949 | 0. 333234 | 3. 270389 | 0. 001074 | 0. 006231171 |
| CR2        | 1419. 767 | 1. 530190477 | 0. 468171 | 3. 268441 | 0. 001081 | 0. 006262386 |
| MYO16-AS1  | 12. 73577 | -1. 61984151 | 0. 496218 | -3. 26437 | 0. 001097 | 0. 006329651 |
| CER1       | 0. 909633 | 1. 109004908 | 0. 340955 | 3. 252642 | 0. 001143 | 0. 006555104 |
| RNU4-53P   | 0. 808682 | -1. 2734034  | 0. 391639 | -3. 25147 | 0. 001148 | 0. 006576966 |

|           |           |              |           |           |           |              |
|-----------|-----------|--------------|-----------|-----------|-----------|--------------|
| ZBPB2     | 1. 250337 | 1. 337887184 | 0. 411564 | 3. 250738 | 0. 001151 | 0. 006591981 |
| IGKJ5     | 7. 472969 | 1. 052785973 | 0. 324616 | 3. 24317  | 0. 001182 | 0. 006720423 |
| CPA6      | 125. 5704 | -1. 19694484 | 0. 369144 | -3. 24249 | 0. 001185 | 0. 006734458 |
| RN7SL44P  | 0. 60325  | -1. 41797129 | 0. 437664 | -3. 23986 | 0. 001196 | 0. 006781614 |
| IGHV3-37  | 2. 850583 | 1. 24560122  | 0. 384464 | 3. 239838 | 0. 001196 | 0. 006781614 |
| MYH6      | 3. 520637 | 1. 033728002 | 0. 321453 | 3. 215795 | 0. 001301 | 0. 007289678 |
| GABRA1    | 3. 159831 | 1. 268628053 | 0. 395169 | 3. 210341 | 0. 001326 | 0. 007410244 |
| SCGB2A2   | 9. 86102  | 3. 138876872 | 0. 977938 | 3. 209688 | 0. 001329 | 0. 007423713 |
| G6PC2     | 1099. 113 | 1. 268668827 | 0. 395274 | 3. 209593 | 0. 001329 | 0. 007425044 |
| G6PC2.1   | 1099. 113 | 1. 268668827 | 0. 395274 | 3. 209593 | 0. 001329 | 0. 007425044 |
| DEFA4     | 1. 074218 | 1. 167328857 | 0. 364062 | 3. 206401 | 0. 001344 | 0. 007489711 |
| DEFA4.1   | 1. 074218 | 1. 167328857 | 0. 364062 | 3. 206401 | 0. 001344 | 0. 007489711 |
| C8orf86   | 0. 678251 | 1. 268945582 | 0. 397078 | 3. 195712 | 0. 001395 | 0. 007715472 |
| LINC00330 | 3. 619367 | -1. 25193325 | 0. 392015 | -3. 19358 | 0. 001405 | 0. 007766804 |
| GPR119    | 35. 62601 | 1. 19100891  | 0. 374511 | 3. 180168 | 0. 001472 | 0. 008071871 |
| TUSC8     | 3. 860583 | 1. 026980241 | 0. 323106 | 3. 178461 | 0. 001481 | 0. 0081116   |
| KRT24     | 1. 436352 | 1. 130096478 | 0. 355784 | 3. 176353 | 0. 001491 | 0. 008159839 |
| PADI3     | 126. 7871 | -1. 13338252 | 0. 356845 | -3. 17612 | 0. 001493 | 0. 008165198 |
| PADI3.1   | 126. 7871 | -1. 13338252 | 0. 356845 | -3. 17612 | 0. 001493 | 0. 008165198 |
| EVX1-AS   | 6. 963215 | -1. 47197886 | 0. 464505 | -3. 16892 | 0. 00153  | 0. 008333112 |
| SYT10     | 3. 449864 | 1. 057859098 | 0. 334012 | 3. 167129 | 0. 00154  | 0. 008378294 |
| SCRT2     | 7. 752543 | 1. 125575066 | 0. 355989 | 3. 161827 | 0. 001568 | 0. 008502142 |
| MIR670HG  | 1. 255526 | 1. 363654662 | 0. 431377 | 3. 16117  | 0. 001571 | 0. 008517586 |
| CPLX2     | 846. 9494 | 1. 016774268 | 0. 321651 | 3. 161111 | 0. 001572 | 0. 008518056 |
| MYLK1     | 5. 382318 | 1. 127388075 | 0. 356782 | 3. 159877 | 0. 001578 | 0. 008545402 |
| IGHJ2P    | 0. 78758  | 1. 567281081 | 0. 496885 | 3. 154212 | 0. 001609 | 0. 00867091  |
| IGHD3-9   | 1. 598289 | 1. 321407536 | 0. 41909  | 3. 153041 | 0. 001616 | 0. 008693042 |
| MS4A10    | 3. 885003 | 1. 610667799 | 0. 511376 | 3. 149675 | 0. 001635 | 0. 008765593 |
| SOX14     | 0. 602624 | 1. 890036364 | 0. 600917 | 3. 145251 | 0. 001659 | 0. 008870408 |
| ANKRD34C  | 14. 36332 | 1. 045835632 | 0. 332777 | 3. 142752 | 0. 001674 | 0. 008929567 |
| IGKV2D-3C | 7. 370388 | 1. 313000209 | 0. 418555 | 3. 136986 | 0. 001707 | 0. 009068015 |
| IRX6      | 10. 59847 | 1. 00052684  | 0. 319161 | 3. 134868 | 0. 001719 | 0. 009123202 |
| IGHV4-4   | 50. 84495 | 1. 02815703  | 0. 328166 | 3. 133041 | 0. 00173  | 0. 009173579 |
| TRAV38-1  | 2. 162885 | 1. 052915564 | 0. 337056 | 3. 123855 | 0. 001785 | 0. 009411923 |
| PRSS56    | 1. 098869 | 1. 135607551 | 0. 363847 | 3. 121114 | 0. 001802 | 0. 009483654 |
| IGKV1-39  | 28. 17621 | 1. 100325949 | 0. 35294  | 3. 117599 | 0. 001823 | 0. 009579651 |
| KRT5      | 4315. 306 | -1. 26828181 | 0. 406897 | -3. 11696 | 0. 001827 | 0. 009598208 |
| CRYGEP    | 0. 586697 | 1. 996615093 | 0. 640949 | 3. 11509  | 0. 001839 | 0. 009647744 |
| RNA5SP301 | 1. 036357 | 1. 137122665 | 0. 366257 | 3. 104712 | 0. 001905 | 0. 009941654 |
| IGHD3-22  | 0. 777485 | 1. 522354245 | 0. 49103  | 3. 10033  | 0. 001933 | 0. 010058225 |
| KRT73-AS1 | 0. 948797 | 1. 670163456 | 0. 539879 | 3. 093589 | 0. 001978 | 0. 010247843 |
| IGHV1-12  | 14. 63582 | 1. 050253327 | 0. 33974  | 3. 091345 | 0. 001993 | 0. 010311103 |
| TRBV16    | 0. 626348 | 1. 529208454 | 0. 494829 | 3. 090375 | 0. 001999 | 0. 010341904 |
| MAGEA12   | 1. 109052 | 1. 128692883 | 0. 365937 | 3. 08439  | 0. 00204  | 0. 010515302 |
| LINC01524 | 3. 306818 | -1. 02378326 | 0. 333234 | -3. 07227 | 0. 002124 | 0. 010877286 |
| GLRA1     | 10. 28277 | 1. 069720569 | 0. 3487   | 3. 067743 | 0. 002157 | 0. 01099577  |
| IGHG4     | 18028. 03 | 1. 111222228 | 0. 363025 | 3. 061007 | 0. 002206 | 0. 011179556 |
| IGKV2D-18 | 1. 196957 | 1. 284623981 | 0. 419827 | 3. 059891 | 0. 002214 | 0. 01121513  |
| IGLV10-54 | 239. 0658 | 1. 091846213 | 0. 357897 | 3. 050726 | 0. 002283 | 0. 011501381 |
| TRBV12-5  | 1. 632624 | 1. 275047303 | 0. 418319 | 3. 048029 | 0. 002303 | 0. 011582888 |
| LINC00456 | 0. 579118 | -1. 30508792 | 0. 428529 | -3. 0455  | 0. 002323 | 0. 011659346 |
| PGPEP1L   | 2. 151067 | 1. 018368071 | 0. 334418 | 3. 045198 | 0. 002325 | 0. 011663775 |
| LINC01254 | 0. 722325 | 1. 573306796 | 0. 516712 | 3. 044845 | 0. 002328 | 0. 01167271  |
| DBET      | 13. 11828 | 1. 314439305 | 0. 432656 | 3. 038074 | 0. 002381 | 0. 011892238 |

|           |          |             |          |          |          |             |
|-----------|----------|-------------|----------|----------|----------|-------------|
| NDST4     | 1.168655 | 1.232590909 | 0.406389 | 3.03303  | 0.002421 | 0.012059009 |
| HHATL-AS1 | 0.984544 | 1.010834976 | 0.333689 | 3.029276 | 0.002451 | 0.012181827 |
| FER1L6    | 1187.718 | -1.03194953 | 0.34116  | -3.02482 | 0.002488 | 0.012317611 |
| CFHR1     | 8.83436  | 1.04396733  | 0.34547  | 3.021875 | 0.002512 | 0.012418231 |
| IQCF1     | 0.930505 | -1.06050215 | 0.35114  | -3.02017 | 0.002526 | 0.012471589 |
| MIR143    | 1.617372 | 1.0112687   | 0.335152 | 3.017347 | 0.00255  | 0.012571466 |
| TRBV7-7   | 1.296018 | 1.055144512 | 0.350132 | 3.013561 | 0.002582 | 0.012705524 |
| RPS4Y2    | 0.977298 | 1.683479254 | 0.558915 | 3.012046 | 0.002595 | 0.012750196 |
| CHRM2     | 13.14116 | 1.171747027 | 0.389053 | 3.011797 | 0.002597 | 0.012757431 |
| KRTAP5-5  | 5.6248   | 1.066945241 | 0.354338 | 3.011096 | 0.002603 | 0.01278179  |
| KRTAP5-5. | 5.6248   | 1.066945241 | 0.354338 | 3.011096 | 0.002603 | 0.01278179  |
| KRTAP5-5. | 5.6248   | 1.066945241 | 0.354338 | 3.011096 | 0.002603 | 0.01278179  |
| UBE2U     | 5.879744 | 1.161509888 | 0.388577 | 2.989137 | 0.002798 | 0.013567063 |
| NMUR2     | 213.7273 | -1.05888387 | 0.354431 | -2.98756 | 0.002812 | 0.013617477 |
| REG4      | 18131.92 | -1.18154699 | 0.396249 | -2.98183 | 0.002865 | 0.013827559 |
| UGT2B17   | 25.4705  | 1.026187539 | 0.347054 | 2.956854 | 0.003108 | 0.014729926 |
| ELF5      | 88.6959  | -1.11849114 | 0.378479 | -2.95522 | 0.003124 | 0.014794669 |
| RPL17P33  | 0.588658 | 1.023654551 | 0.346613 | 2.953308 | 0.003144 | 0.014872001 |
| LINC00305 | 0.518965 | 1.207139723 | 0.408862 | 2.952437 | 0.003153 | 0.014896226 |
| SPINK8    | 0.551695 | 1.947603589 | 0.662454 | 2.939984 | 0.003282 | 0.015387676 |
| IRS4      | 2.191215 | 1.056781339 | 0.359564 | 2.939065 | 0.003292 | 0.015425478 |
| DEFA3     | 1.597472 | 1.402552116 | 0.478449 | 2.931453 | 0.003374 | 0.015740413 |
| DEFA3.1   | 1.597472 | 1.402552116 | 0.478449 | 2.931453 | 0.003374 | 0.015740413 |
| RNU6-875F | 0.487451 | -1.33458498 | 0.456174 | -2.92561 | 0.003438 | 0.015984459 |
| PES1P2    | 0.45126  | 1.134327439 | 0.387969 | 2.923755 | 0.003458 | 0.01606364  |
| LINC01098 | 2.655669 | -1.12721298 | 0.386442 | -2.9169  | 0.003535 | 0.016344628 |
| IGHE      | 30.98431 | 1.028672535 | 0.352762 | 2.916049 | 0.003545 | 0.016366574 |
| PCA3      | 1.599699 | 1.883160634 | 0.648085 | 2.905733 | 0.003664 | 0.016825113 |
| SPATA42   | 0.6922   | 1.166083121 | 0.401993 | 2.900754 | 0.003723 | 0.017042964 |
| CWH43     | 9.6802   | -1.04791693 | 0.36138  | -2.89977 | 0.003734 | 0.017079414 |
| RPL34P26  | 0.604979 | 1.246715634 | 0.429935 | 2.899775 | 0.003734 | 0.017079414 |
| CLCA1     | 266.8839 | 1.653522648 | 0.570516 | 2.898294 | 0.003752 | 0.017131054 |
| DGKK      | 1.485195 | 1.063272749 | 0.367429 | 2.893819 | 0.003806 | 0.017312597 |
| AADACL4   | 0.537103 | 1.439791433 | 0.497554 | 2.893736 | 0.003807 | 0.017315024 |
| LY6K      | 164.7874 | -1.2072732  | 0.417245 | -2.89344 | 0.00381  | 0.017324872 |
| RN7SL842F | 0.544077 | 2.287330173 | 0.790574 | 2.893251 | 0.003813 | 0.017331111 |
| MIR5196   | 0.588794 | 1.272082632 | 0.440111 | 2.890368 | 0.003848 | 0.017449897 |
| RPL7P33   | 0.663714 | 1.071190194 | 0.370956 | 2.887646 | 0.003881 | 0.017564761 |
| ISX       | 5.870708 | 1.039714497 | 0.360216 | 2.886367 | 0.003897 | 0.017631953 |
| EIF4E1B   | 5.222463 | 1.11931101  | 0.389233 | 2.875687 | 0.004031 | 0.018101624 |
| IGKV3D-7  | 2.857904 | 1.156794491 | 0.404367 | 2.860757 | 0.004226 | 0.018788261 |
| INS       | 54997.97 | 1.135478067 | 0.397184 | 2.85882  | 0.004252 | 0.018880522 |
| TRAV33    | 0.923495 | -1.83203181 | 0.644384 | -2.84308 | 0.004468 | 0.019653875 |
| BFSP2-AS1 | 1.797162 | 1.00939467  | 0.35709  | 2.826724 | 0.004703 | 0.020473501 |
| HAND1     | 6.078887 | 1.326141576 | 0.469653 | 2.823665 | 0.004748 | 0.020618101 |
| IGHV1-68  | 1.597909 | 1.308986664 | 0.464847 | 2.815951 | 0.004863 | 0.021035133 |
| OPRK1     | 3.93365  | -1.0578198  | 0.376215 | -2.81174 | 0.004927 | 0.021270071 |
| FOXL2NB   | 4.373702 | -1.24163059 | 0.442623 | -2.80517 | 0.005029 | 0.021590279 |
| LINC01215 | 1.209944 | -1.03442814 | 0.369796 | -2.79729 | 0.005153 | 0.022002196 |
| CECR3     | 0.922228 | 1.088530148 | 0.389847 | 2.7922   | 0.005235 | 0.02229978  |
| MIR4795   | 0.477837 | -1.32391826 | 0.475271 | -2.78561 | 0.005343 | 0.022671833 |
| OR11H13P  | 0.688183 | -1.32218547 | 0.47472  | -2.78519 | 0.00535  | 0.02269049  |
| IAPP      | 924.4475 | 1.174333375 | 0.421977 | 2.782932 | 0.005387 | 0.022829286 |
| RN7SL338F | 0.524299 | 1.182135102 | 0.425421 | 2.778739 | 0.005457 | 0.023042326 |

|           |          |             |          |          |          |             |
|-----------|----------|-------------|----------|----------|----------|-------------|
| LRR53     | 0.754885 | 1.363085718 | 0.490601 | 2.778397 | 0.005463 | 0.023055996 |
| TRAJ38    | 0.456145 | 1.204083578 | 0.434723 | 2.769771 | 0.00561  | 0.023561866 |
| OTC       | 65.97169 | 1.049358091 | 0.378953 | 2.769095 | 0.005621 | 0.023581334 |
| MAGEA10   | 1.090481 | -1.15171463 | 0.416741 | -2.76362 | 0.005716 | 0.023882264 |
| LINC00561 | 0.420931 | 1.781379326 | 0.647928 | 2.749346 | 0.005971 | 0.024717734 |
| OR8G5     | 0.612667 | 1.542822659 | 0.561247 | 2.74892  | 0.005979 | 0.024741518 |
| SCGB1C2   | 0.600411 | 1.972743233 | 0.719843 | 2.740519 | 0.006134 | 0.025275016 |
| SCGB1C2.1 | 0.600411 | 1.972743233 | 0.719843 | 2.740519 | 0.006134 | 0.025275016 |
| RPL9P33   | 0.669785 | 1.274530741 | 0.465237 | 2.739528 | 0.006153 | 0.025324765 |
| MAGEC3    | 1.533811 | 1.041167576 | 0.380503 | 2.73629  | 0.006214 | 0.025483377 |
| LINC01099 | 28.10901 | 1.003737898 | 0.367131 | 2.734003 | 0.006257 | 0.025628454 |
| RNY1P11   | 0.479211 | 1.643306076 | 0.601993 | 2.729778 | 0.006338 | 0.025895756 |
| IGKV1-33  | 10.835   | 1.054670171 | 0.386806 | 2.726611 | 0.006399 | 0.026087645 |
| OR2B11    | 0.549447 | 1.275102305 | 0.468619 | 2.72098  | 0.006509 | 0.026424896 |
| UCMA      | 0.67095  | 1.230311656 | 0.452294 | 2.720158 | 0.006525 | 0.026487739 |
| CD200R1L  | 1.433607 | -1.11240752 | 0.411883 | -2.70079 | 0.006918 | 0.027716991 |
| EEF1A1P34 | 0.532779 | 1.048721512 | 0.38897  | 2.696148 | 0.007015 | 0.028029668 |
| PPIAP26   | 0.424894 | 1.132308468 | 0.419981 | 2.696095 | 0.007016 | 0.028031036 |
| IFNA1     | 2.476029 | -1.21372946 | 0.452486 | -2.68236 | 0.007311 | 0.028934027 |
| HMX1      | 0.837307 | 1.052420338 | 0.394478 | 2.667882 | 0.007633 | 0.029950953 |
| HMX1.1    | 0.837307 | 1.052420338 | 0.394478 | 2.667882 | 0.007633 | 0.029950953 |
| LINC01539 | 1.85245  | 1.143362223 | 0.428797 | 2.666444 | 0.007666 | 0.030066556 |
| WWC2-AS1  | 0.813451 | 1.009928737 | 0.382033 | 2.643566 | 0.008204 | 0.031736427 |
| MIR222    | 0.974238 | -1.07970916 | 0.409807 | -2.63468 | 0.008422 | 0.032422589 |
| RN7SL36P  | 0.360246 | -1.09462634 | 0.416165 | -2.63027 | 0.008532 | 0.032780974 |
| MS4A3     | 1.115    | 1.050972126 | 0.400945 | 2.621237 | 0.008761 | 0.033498006 |
| MS4A3.1   | 1.115    | 1.050972126 | 0.400945 | 2.621237 | 0.008761 | 0.033498006 |
| TRAJ2     | 0.665451 | 1.146338022 | 0.437445 | 2.620531 | 0.008779 | 0.033553502 |
| TCERG1L-1 | 0.778631 | 1.001298815 | 0.383762 | 2.609167 | 0.009076 | 0.034427357 |
| VSTM2B    | 0.888988 | 1.062782453 | 0.407512 | 2.607978 | 0.009108 | 0.034518682 |
| FABP2     | 31.94536 | 1.059914251 | 0.407305 | 2.602262 | 0.009261 | 0.034998454 |
| CST8      | 0.822369 | -1.71970021 | 0.662172 | -2.59706 | 0.009403 | 0.035387569 |
| RNU7-186F | 0.879153 | -1.0350222  | 0.400507 | -2.58428 | 0.009758 | 0.036453764 |
| SERPINA9  | 11.52041 | 1.016844525 | 0.393893 | 2.581527 | 0.009836 | 0.036675205 |
| SOX3      | 0.714038 | 1.348638733 | 0.523276 | 2.577297 | 0.009958 | 0.037032263 |
| OR7E136P  | 0.823021 | -1.36731672 | 0.533363 | -2.56358 | 0.01036  | 0.038197456 |
| OR52P1P   | 0.566399 | 1.000029162 | 0.390604 | 2.560211 | 0.010461 | 0.038511424 |
| LINC00269 | 1.496839 | 1.070949448 | 0.41847  | 2.559201 | 0.010491 | 0.038588834 |
| PSAPL1    | 269.2083 | -1.0687717  | 0.418519 | -2.5537  | 0.010659 | 0.039055691 |
| MIR608    | 0.554626 | -1.14960069 | 0.450213 | -2.55346 | 0.010666 | 0.039070788 |
| MIR6859-2 | 0.643226 | 1.032347263 | 0.404445 | 2.552504 | 0.010695 | 0.039140342 |
| IGHD3-10  | 0.472666 | 1.523535469 | 0.596971 | 2.55211  | 0.010707 | 0.039171574 |
| PWRN3     | 0.4331   | 1.269752412 | 0.498954 | 2.544827 | 0.010933 | 0.039811966 |
| SRY       | 1.620896 | 1.559541321 | 0.613589 | 2.541672 | 0.011032 | 0.040105596 |
| SPATA16   | 0.641821 | 1.120838747 | 0.443167 | 2.529156 | 0.011434 | 0.041274953 |
| SLC22A25  | 0.486412 | -1.15086331 | 0.455133 | -2.52863 | 0.011451 | 0.04131227  |
| CRH       | 56.2086  | 1.0957939   | 0.434423 | 2.52241  | 0.011655 | 0.041898259 |
| PSG3      | 0.550389 | 1.406029833 | 0.559733 | 2.511964 | 0.012006 | 0.04289015  |
| IFNA5     | 0.536591 | 1.268709043 | 0.507234 | 2.501232 | 0.012376 | 0.043855135 |
| KCNJ18    | 1.339857 | 1.63266667  | 0.653325 | 2.49901  | 0.012454 | 0.044067328 |
| LINC01497 | 2.259266 | 1.113029581 | 0.44711  | 2.489387 | 0.012796 | 0.045000033 |
| GZMAP1    | 0.612599 | 1.152335517 | 0.463007 | 2.488808 | 0.012817 | 0.045040338 |
| GPR6      | 1.818332 | 1.043763488 | 0.419719 | 2.486816 | 0.012889 | 0.045235158 |
| IGKV2D-2C | 0.72009  | 1.416195249 | 0.570394 | 2.482836 | 0.013034 | 0.045619423 |

|         |          |             |          |          |          |             |
|---------|----------|-------------|----------|----------|----------|-------------|
| GABRR3  | 0.465179 | 1.357566916 | 0.547369 | 2.480167 | 0.013132 | 0.045892424 |
| NKX2-8  | 11.96854 | -1.30416396 | 0.52827  | -2.46875 | 0.013559 | 0.047061377 |
| CHIA    | 0.795144 | 1.24344487  | 0.504999 | 2.462272 | 0.013806 | 0.047690729 |
| MCCD1   | 0.757356 | 1.290674608 | 0.527012 | 2.449042 | 0.014324 | 0.049054487 |
| MCCD1.1 | 0.757356 | 1.290674608 | 0.527012 | 2.449042 | 0.014324 | 0.049054487 |
| MCCD1.2 | 0.757356 | 1.290674608 | 0.527012 | 2.449042 | 0.014324 | 0.049054487 |
| MCCD1.3 | 0.757356 | 1.290674608 | 0.527012 | 2.449042 | 0.014324 | 0.049054487 |
| MCCD1.4 | 0.757356 | 1.290674608 | 0.527012 | 2.449042 | 0.014324 | 0.049054487 |
| MCCD1.5 | 0.757356 | 1.290674608 | 0.527012 | 2.449042 | 0.014324 | 0.049054487 |
| MCCD1.6 | 0.757356 | 1.290674608 | 0.527012 | 2.449042 | 0.014324 | 0.049054487 |
| MCCD1.7 | 0.757356 | 1.290674608 | 0.527012 | 2.449042 | 0.014324 | 0.049054487 |
| OTOP2   | 0.978087 | -1.12800606 | 0.461443 | -2.44452 | 0.014505 | 0.049558594 |
| SLC32A1 | 1.02381  | 1.024892375 | 0.419952 | 2.440498 | 0.014667 | 0.049997627 |
